# Supplementary material for: Multi-omics characterization of partial chemical reprogramming reveals evidence of cell rejuvenation
Source: eLife. 2024 Mar 22;12:RP90579. doi: 10.7554/eLife.90579 (PMC10959535; doi:10.7554/eLife.90579)
Supplement: Figure 1—source data 1. [file elife-90579-fig1-data1.xlsx]

## Sheet: chemreprog
treatment	% increase normalized fluorescence intensity	sd
young control	100	16.2091
young 2c	164.363	17.4335
young 7c	452.127	9.84591
young CCCP	37.0248	3.64322
old control	100	21.1946
old 2c	185.395	16.8685
old 7c	411.613	12.6687
old CCCP	44.1327	3.69199
