# Supplementary material for: Multi-omics characterization of partial chemical reprogramming reveals evidence of cell rejuvenation
Source: eLife. 2024 Mar 22;12:RP90579. doi: 10.7554/eLife.90579 (PMC10959535; doi:10.7554/eLife.90579)
Supplement: Figure 1—source data 2. [file elife-90579-fig1-data2.xlsx]

## Sheet: analysis
basal mito
treatment	1	2	3	4	5	6	7	8	9	10	11	12	avg	stdev
young control	39.2308	37.424	32.0517	41.3112	41.0063	49.4847	44.1801	38.3441	40.8799	54.9765	48.8805	51.6418	43.2843	6.6969
young 2c	35.5269	31.2975	31.5527	35.5705	34.5831	30.0719	25.1652	23.2506	21.5378	26.7234	22.4005	27.0415	28.7268	5.09018
young 7c	37.8243	28.4184	65.5715	37.552	35.956	42.2305	36.9679	25.517	41.5706	40.2722	36.4784	48.2587	39.7181	10.0961
old control	36.8131	32.8718	35.2848	36.5309	32.9028	44.0609	75.8851	62.3088	56.4895	58.3213	40.1044	58.0024	47.4647	14.176
old 2c	32.0559	39.9301	34.5938	26.2494	29.9072	29.3369	29.6395	33.6863	28.2487	31.4644	32.5832	34.0942	31.8158	3.58345
old 7c	42.4532	37.7525	37.5833	37.1064	31.0348	29.4216	41.2848	40.4279	39.4332	41.7653	44.8567	36.3495	38.2891	4.51884
proton leak (oligomycin)
treatment	1	2	3	4	5	6	7	8	9	10	11	12	avg	stdev
young control	9.40576	9.07949	7.26933	7.68493	3.81603	7.95322	8.27368	5.85954	7.35848	10.3745	10.6426	9.27946	8.08308	1.91942
young 2c	9.39915	7.85763	8.76095	8.84033	8.1897	6.75895	6.63521	5.65543	4.79381	6.99058	1.89701	6.83688	6.88464	2.07076
young 7c	15.5771	14.8846	31.2475	13.7182	13.5344	17.9734	12.8093	10.8681	16.931	12.2766	10.5249	20.9228	15.939	5.67694
old control	7.36643	5.63927	6.98293	7.09854	5.34295	7.66128	14.52	11.656	11.1145	12.9811	9.39368	12.2373	9.33283	3.07429
old 2c	6.61452	11.7848	9.21433	4.27228	5.83536	7.16223	6.83402	9.10383	6.06898	6.37892	7.59076	8.5272	7.44893	1.97111
old 7c	20.0725	16.7818	14.7125	15.5964	10.9636	9.67399	19.2072	18.8282	18.1154	20.5947	17.6465	14.4698	16.3886	3.4577
spare respiratory capacity
treatment	1	2	3	4	5	6	7	8	9	10	11	12	avg	stdev
young control	62.4035	54.3236	47.9548	71.0529	81.5189	85.667	63.5952	60.9403	54.4718	85.9212	74.4497	65.4208	67.31	12.5783
young 2c	67.9103	56.9946	56.3118	91.3928	55.8395	63.9368	48.8392	49.1569	39.4403	65.6124	71.3925	65.4886	61.0263	13.3046
young 7c	161.416	172.471	172.175	203.522	204.318	192.017	152.542	151.507	147.577	129.309	138.31	155.222	165.032	24.4996
old control	61.0327	52.3885	44.2464	67.0737	62.0966	69.97	95.3362	83.1532	76.8621	65.6229	47.7331	70.3042	66.3183	14.5829
old 2c	64.9661	99.6501	88.0468	74.6375	87.0524	73.3618	77.7499	89.3378	73.1903	59.4396	70.5029	56.1583	76.1745	12.9468
old 7c	200.511	185.79	187.172	206.297	183.912	180.928	212.687	174.803	197.343	140.935	161.451	141.179	181.084	23.3018
fccp
treatment	1	2	3	4	5	6	7	8	9	10	11	12	avg	stdev
young control	101.634	91.7476	80.0065	112.364	122.525	135.152	107.775	99.2844	95.3517	140.898	123.33	117.063	110.594	18.1162
young 2c	103.437	88.2921	87.8645	126.963	90.4226	94.0086	74.0044	72.4075	60.9781	92.3358	93.7929	92.5301	89.7531	16.5247
young 7c	199.24	200.89	237.747	241.074	240.274	234.248	189.51	177.024	189.148	169.582	174.789	203.481	204.75	26.9108
old control	97.8458	85.2603	79.5311	103.605	94.9995	114.031	171.221	145.462	133.352	123.944	87.8375	128.307	113.783	27.5849
old 2c	97.0221	139.58	122.641	100.887	116.96	102.699	107.389	123.024	101.439	90.9041	103.086	90.2525	107.99	14.7453
old 7c	242.964	223.543	224.755	243.404	214.947	210.35	253.972	215.231	236.776	182.7	206.308	177.529	219.373	23.4812

## Sheet: representative
time (min)	ocr	uncertainty	group	norm. factor	time	corrected ocr	corrected uncertainty		time	young control		young 2c		young 7c		old control		old 2c		old 7c
1.37984	102.267	11.1718	young control	2.9	1.37984	35.2645	3.85235		1.37984	35.2645	3.85235	37.3283	3.63979	43.2346	8.29472	42.2403	2.80295	46.0665	4.95573	49.3677	3.17333
1.37984	97.0537	9.46345	young 2c	2.6	1.37984	37.3283	3.63979		9.88674	32.2646	4.38003	35.9574	2.88555	42.4163	5.34538	40.7312	2.30425	45.0231	4.57823	48.4438	2.06445
1.37984	56.205	10.7831	young 7c	1.3	1.37984	43.2346	8.29472		18.3942	32.8946	3.33697	37.0754	2.5422	45.1394	4.42502	41.5434	2.22531	46.2368	3.73898	50.6944	1.3905
1.37984	126.721	8.40886	old control	3	1.37984	42.2403	2.80295		27.0107	5.59707	0.817319	13.5254	0.938423	23.0523	6.32281	13.3866	1.66678	19.7141	2.78429	28.6203	1.43929
1.37984	110.56	11.8938	old 2c	2.4	1.37984	46.0665	4.95573		35.5218	6.35236	0.563594	13.611	0.905726	23.8712	7.71906	14.0996	1.05371	19.6044	2.07342	32.0988	1.25503
1.37984	74.0516	4.76	old 7c	1.5	1.37984	49.3677	3.17333		44.0298	6.00521	0.574722	12.9556	0.780863	23.2944	8.80371	13.708	1.66971	19.2259	2.34817	32.681	1.25843
9.88674	93.5672	12.7021	young control	2.9	9.88674	32.2646	4.38003		52.6401	85.8417	12.2472	88.4394	7.7833	190.673	13.7278	82.4624	7.35482	113.151	29.7325	238.428	11.5229
9.88674	93.4892	7.50243	young 2c	2.6	9.88674	35.9574	2.88555		61.148	87.1641	10.6887	93.1479	8.06043	209.404	11.3057	86.2525	7.94067	121.338	27.9916	241.852	9.51863
9.88674	55.1412	6.949	young 7c	1.3	9.88674	42.4163	5.34538		69.6567	79.4265	7.88401	97.481	9.01998	204.751	10.291	94.0993	7.99718	132.904	22.6526	215.756	7.17561
9.88674	122.193	6.91274	old control	3	9.88674	40.7312	2.30425		78.273	-1.01564	0.680212	6.20234	0.448283	6.2756	11.8229	8.22478	1.81247	12.8477	0.216988	16.3204	0.47455
9.88674	108.056	10.9877	old 2c	2.4	9.88674	45.0231	4.57823		86.781	-1.09266	1.04293	6.20614	0.488412	7.32455	17.1682	8.00445	1.29574	11.8507	0.377355	15.0083	0.192218
9.88674	72.6657	3.09668	old 7c	1.5	9.88674	48.4438	2.06445		95.2871	-2.91079	0.439561	4.28305	0.727619	3.62067	18.5018	6.55355	1.50808	9.74922	0.865585	11.4314	1.37995
18.3942	95.3942	9.67721	young control	2.9	18.3942	32.8946	3.33697
18.3942	96.396	6.60972	young 2c	2.6	18.3942	37.0754	2.5422
18.3942	58.6812	5.75253	young 7c	1.3	18.3942	45.1394	4.42502
18.3942	124.63	6.67592	old control	3	18.3942	41.5434	2.22531
18.3942	110.968	8.97356	old 2c	2.4	18.3942	46.2368	3.73898
18.3942	76.0415	2.08575	old 7c	1.5	18.3942	50.6944	1.3905
27.0107	16.2315	2.37023	young control	2.9	27.0107	5.59707	0.817319
27.0107	35.1661	2.4399	young 2c	2.6	27.0107	13.5254	0.938423
27.0107	29.9679	8.21965	young 7c	1.3	27.0107	23.0523	6.32281
27.0107	40.1598	5.00034	old control	3	27.0107	13.3866	1.66678
27.0107	47.3137	6.68229	old 2c	2.4	27.0107	19.7141	2.78429
27.0107	42.9304	2.15893	old 7c	1.5	27.0107	28.6203	1.43929
35.5218	18.4218	1.63442	young control	2.9	35.5218	6.35236	0.563594
35.5218	35.3887	2.35489	young 2c	2.6	35.5218	13.611	0.905726
35.5218	31.0326	10.0348	young 7c	1.3	35.5218	23.8712	7.71906
35.5218	42.2988	3.16113	old control	3	35.5218	14.0996	1.05371
35.5218	47.0505	4.97622	old 2c	2.4	35.5218	19.6044	2.07342
35.5218	48.1481	1.88254	old 7c	1.5	35.5218	32.0988	1.25503
44.0298	17.4151	1.66669	young control	2.9	44.0298	6.00521	0.574722
44.0298	33.6846	2.03024	young 2c	2.6	44.0298	12.9556	0.780863
44.0298	30.2828	11.4448	young 7c	1.3	44.0298	23.2944	8.80371
44.0298	41.1239	5.00912	old control	3	44.0298	13.708	1.66971
44.0298	46.1422	5.63561	old 2c	2.4	44.0298	19.2259	2.34817
44.0298	49.0215	1.88765	old 7c	1.5	44.0298	32.681	1.25843
52.6401	248.941	35.517	young control	2.9	52.6401	85.8417	12.2472
52.6401	229.942	20.2366	young 2c	2.6	52.6401	88.4394	7.7833
52.6401	247.875	17.8462	young 7c	1.3	52.6401	190.673	13.7278
52.6401	247.387	22.0645	old control	3	52.6401	82.4624	7.35482
52.6401	271.562	71.3581	old 2c	2.4	52.6401	113.151	29.7325
52.6401	357.642	17.2844	old 7c	1.5	52.6401	238.428	11.5229
61.148	252.776	30.9972	young control	2.9	61.148	87.1641	10.6887
61.148	242.185	20.9571	young 2c	2.6	61.148	93.1479	8.06043
61.148	272.226	14.6974	young 7c	1.3	61.148	209.404	11.3057
61.148	258.758	23.822	old control	3	61.148	86.2525	7.94067
61.148	291.212	67.1799	old 2c	2.4	61.148	121.338	27.9916
61.148	362.778	14.278	old 7c	1.5	61.148	241.852	9.51863
69.6567	230.337	22.8636	young control	2.9	69.6567	79.4265	7.88401
69.6567	253.45	23.4519	young 2c	2.6	69.6567	97.481	9.01998
69.6567	266.176	13.3783	young 7c	1.3	69.6567	204.751	10.291
69.6567	282.298	23.9915	old control	3	69.6567	94.0993	7.99718
69.6567	318.968	54.3663	old 2c	2.4	69.6567	132.904	22.6526
69.6567	323.634	10.7634	old 7c	1.5	69.6567	215.756	7.17561
78.273	-2.94535	1.97261	young control	2.9	78.273	-1.01564	0.680212
78.273	16.1261	1.16554	young 2c	2.6	78.273	6.20234	0.448283
78.273	8.15829	15.3698	young 7c	1.3	78.273	6.2756	11.8229
78.273	24.6743	5.43741	old control	3	78.273	8.22478	1.81247
78.273	30.8345	0.520771	old 2c	2.4	78.273	12.8477	0.216988
78.273	24.4805	0.711826	old 7c	1.5	78.273	16.3204	0.47455
86.781	-3.16871	3.0245	young control	2.9	86.781	-1.09266	1.04293
86.781	16.136	1.26987	young 2c	2.6	86.781	6.20614	0.488412
86.781	9.52191	22.3187	young 7c	1.3	86.781	7.32455	17.1682
86.781	24.0133	3.88721	old control	3	86.781	8.00445	1.29574
86.781	28.4417	0.905652	old 2c	2.4	86.781	11.8507	0.377355
86.781	22.5125	0.288327	old 7c	1.5	86.781	15.0083	0.192218
95.2871	-8.4413	1.27473	young control	2.9	95.2871	-2.91079	0.439561
95.2871	11.1359	1.89181	young 2c	2.6	95.2871	4.28305	0.727619
95.2871	4.70688	24.0524	young 7c	1.3	95.2871	3.62067	18.5018
95.2871	19.6606	4.52424	old control	3	95.2871	6.55355	1.50808
95.2871	23.3981	2.0774	old 2c	2.4	95.2871	9.74922	0.865585
95.2871	17.1471	2.06992	old 7c	1.5	95.2871	11.4314	1.37995
