# Supplementary material for: Multi-omics characterization of partial chemical reprogramming reveals evidence of cell rejuvenation
Source: eLife. 2024 Mar 22;12:RP90579. doi: 10.7554/eLife.90579 (PMC10959535; doi:10.7554/eLife.90579)
Supplement: Figure 2—source data 1. [file elife-90579-fig2-data1.xlsx]

## Sheet: Pluripotency_markers_logexpress
old	2c	7c	control	2c	7c	control	2c	7c	control	2c	7c	control		young	2c	7c	control	2c	7c	control	2c	7c	control	2c	7c	control
Klf4	2.61423	2.6868	2.32795	2.81719	2.69613	2.6549	2.69297	2.77266	2.58476	2.6672	2.47221	2.43106		Klf4	2.42575	2.68608	2.42371	2.60889	2.73592	2.57038	2.518	2.67491	2.4592	2.56376	2.53224	2.444
Myc	2.76226	2.20576	2.34217	2.75833	2.2436	2.52454	2.74358	2.23614	2.48973	2.75524	2.34042	2.55984		Myc	2.74314	2.42812	2.63405	2.77315	2.36047	2.57225	2.73537	2.34019	2.53671	2.72453	2.2956	2.57619
Sox2	0.434477	0.191502	0	0.445474	0	0	0.583751	0	0	0.576366	0	0.205409		Sox2	0.739117	0	0	0.488736	0	0	0.517189	0	0	0.320197	0	0
Esrrb	0.863594	0.942432	0.526311	0.600095	0.692652	0.339687	1.04943	0.857108	0.546306	0.913949	0	0.205409		Esrrb	0.623563	0.40113	0	0	0.332206	0	0.586861	0.654566	0	0.571198	0.659177	0
Nanog	0.700011	0	0.657024	0.340994	0.326791	0.711946	0	0.194042	0.546306	0.468222	0	0.533902		Nanog	0.215005	0	0.542865	0.556501	0	0.675842	0.331422	0	0.760527	0.571198	0	0.327777
Bend4	0.747034	1.06181	0.596567	0.713887	1.1769	0.711946	1.0913	1.33929	0.546306	0.688268	0.942703	0		Bend4	0.465654	0.782575	0.614147	0.615105	0.790273	0.457935	0.646886	1.10426	0.660015	0.809643	1.2158	0.194104
