# Supplementary material for: Multi-omics characterization of partial chemical reprogramming reveals evidence of cell rejuvenation
Source: eLife. 2024 Mar 22;12:RP90579. doi: 10.7554/eLife.90579 (PMC10959535; doi:10.7554/eLife.90579)
Supplement: Figure 2—source data 2. [file elife-90579-fig2-data2.xlsx]

## Sheet: Sheet1
20 month
control	0.3947	0.4148	0.3878	0.403
2c	0.39	0.4003	0.3959	0.3952
7c	0.3689	0.3878	0.3662	0.37
4 month
control	0.3836	0.4009	0.3924	0.3835
2c	0.3776	0.4025	0.4016	0.3939
7c	0.365	0.3717	0.382	0.37
