# Supplementary material for: Multi-omics characterization of partial chemical reprogramming reveals evidence of cell rejuvenation
Source: eLife. 2024 Mar 22;12:RP90579. doi: 10.7554/eLife.90579 (PMC10959535; doi:10.7554/eLife.90579)
Supplement: Figure 3—source data 1. [file elife-90579-fig3-data1.xlsx]

## Sheet: 2c_4m
Entrez ID	Gene_symbol	logFC	logCPM	LR	P.Value	FDR
29815	Bcar3	3.51123	5.3234	1412.24	0	1.14599e-306
235344	Sik2	2.58937	6.85518	1404.38	2.34682e-307	5.74226e-305
53896	Slc7a10	10.7363	3.96213	1397.14	8.79908e-306	2.11934e-303
12654	Chil1	-3.73101	8.22843	1383.62	7.63368e-303	1.81036e-300
16164	Il13ra1	-3.85374	5.68287	1358.17	2.58865e-297	6.04606e-295
11658	Alcam	3.24012	5.62003	1332.33	1.06676e-291	2.45435e-289
20249	Scd1	5.30724	10.4593	1327.74	1.05922e-290	2.40117e-288
211347	Pank3	2.97103	8.72563	1273.62	6.11143e-279	1.36533e-276
107747	Aldh1l1	2.92871	6.14365	1234.64	1.8122e-270	3.99071e-268
212862	Chpt1	2.58618	7.42036	1231.46	8.86759e-270	1.92527e-267
22117	Tst	5.06636	5.56331	1231.23	9.9595e-270	2.1323e-267
83379	Klb	9.67788	3.76581	1220.18	2.50367e-267	5.28686e-265
58909	Fam13a	4.46491	5.30707	1211.91	1.5725e-265	3.2757e-263
72039	Mccc1	2.94597	6.62543	1211.41	2.02316e-265	4.15826e-263
319520	Dusp4	4.28891	4.97021	1199.82	6.68402e-263	1.35571e-260
231070	Insig1	2.66952	7.10205	1167.62	6.65045e-256	1.33139e-253
22042	Tfrc	3.01612	7.83501	1167.34	7.63011e-256	1.50792e-253
80879	Slc16a3	-2.96805	6.48641	1147.66	1.44721e-251	2.8239e-249
76187	Adhfe1	3.10078	5.46304	1145.35	4.60334e-251	8.87006e-249
14057	Sfxn1	2.29013	7.02482	1132.17	3.35844e-248	6.39139e-246
19116	Prlr	3.88874	5.30614	1111.34	1.13167e-243	2.12741e-241
12479	Cd1d1	2.32918	6.60062	1098.83	5.94532e-241	1.10418e-238
12835	Col6a3	2.72487	9.69807	1093.45	8.76606e-240	1.60868e-237
16803	Lbp	-2.36588	6.48793	1076.68	3.86359e-236	7.00673e-234
70335	Reep6	5.4342	4.14937	1072.75	2.75994e-235	4.94704e-233
56615	Mgst1	2.36717	7.93338	1066.8	5.43421e-234	9.62855e-232
103172	Chchd10	7.70197	6.71029	1065.07	1.2878e-233	2.25585e-231
20377	Sfrp1	-2.69687	9.7008	1065.03	1.31682e-233	2.28075e-231
67784	Plxnd1	2.59179	8.07784	1060.92	1.03034e-232	1.76475e-230
54403	Slc4a4	2.97571	5.3152	1059.25	2.37982e-232	4.0313e-230
11754	Aoc3	2.65373	8.34806	1056.62	8.86009e-232	1.48455e-229
70564	Prxl2a	4.87342	5.53175	1053.52	4.19007e-231	6.94515e-229
76969	Chst1	3.20569	5.20875	1019.07	1.28309e-223	2.10413e-221
319880	Tmcc3	2.5201	6.15709	1017.4	2.96477e-223	4.81072e-221
58178	Sorcs1	4.64191	4.25097	1015.35	8.27726e-223	1.3291e-220
319196	Ankef1	5.57246	4.20233	1014.37	1.35446e-222	2.15248e-220
17347	Mknk2	2.42786	7.81691	993.209	5.37424e-218	8.45346e-216
228859	Fitm2	2.85534	6.33416	990.854	1.74712e-217	2.72039e-215
319480	Itga11	-2.17154	7.37514	984.49	4.22184e-216	6.50796e-214
18391	Sigmar1	2.2003	7.21043	965.077	7.00614e-212	1.0693e-209
66447	Mgst3	3.10828	5.20373	962.682	2.3222e-211	3.50948e-209
67469	Abhd5	2.44333	6.48883	962.146	3.03788e-211	4.54649e-209
77037	Mrap	8.53065	3.53808	958.589	1.80212e-210	2.67112e-208
19139	Prps1	2.55038	6.39813	958.366	2.0149e-210	2.95806e-208
108682	Gpt2	2.73247	5.70345	956.577	4.93155e-210	7.17168e-208
18828	Plscr2	-3.57738	5.07828	951.431	6.48224e-209	9.33867e-207
11489	Adam12	2.7507	7.68831	946.325	8.34934e-208	1.19171e-205
67895	Ppa1	3.19903	7.58252	940.334	1.67465e-206	2.36832e-204
81877	Tnxb	3.6476	4.93731	940.111	1.8721e-206	2.6235e-204
118453	Mmp28	3.13152	5.14163	938.465	4.26813e-206	5.92732e-204
20514	Slc1a5	2.34678	8.52899	936.019	1.45206e-205	1.99852e-203
20411	Sorbs1	2.25225	7.29659	930.601	2.18647e-204	2.9827e-202
11428	Aco1	2.23107	7.90299	920.654	3.176e-202	4.29456e-200
20305	Ccl6	4.75406	4.29278	918.762	8.19033e-202	1.09786e-199
12036	Bcat2	2.57535	7.16752	917.478	1.55731e-201	2.06948e-199
14645	Glul	2.24338	8.34947	915.021	5.32649e-201	7.01776e-199
71361	Aifm2	2.726	5.72809	911.031	3.92461e-200	5.12694e-198
195733	Grhl1	5.46847	3.68979	905.969	4.94586e-199	6.40676e-197
11363	Acadl	2.08883	7.52259	901.235	5.28836e-198	6.79334e-196
74148	Cluh	2.59519	7.67433	888.009	3.96742e-195	5.05436e-193
18576	Pde3b	2.57924	7.04941	887.544	5.00712e-195	6.32662e-193
192897	Itgb4	3.48576	5.14467	869.293	4.64773e-191	5.82478e-189
93689	Lmod1	2.50895	5.51933	863.034	1.06668e-189	1.32604e-187
52665	Echdc1	3.09062	4.78383	859.235	7.14328e-189	8.8091e-187
18534	Pck1	12.232	3.1356	852.65	1.92925e-187	2.36026e-185
170826	Ppargc1b	5.81887	3.74466	851.272	3.84658e-187	4.66891e-185
15439	Hp	2.51678	8.58142	849.722	8.35488e-187	1.00618e-184
12609	Cebpd	-2.28488	7.59797	846.631	3.92737e-186	4.69306e-184
13063	Cycs	2.16559	6.56471	837.464	3.86409e-184	4.58192e-182
17879	Myh1	2.12291	6.52532	836.577	6.02359e-184	7.08806e-182
53867	Col5a3	2.74394	5.59638	836.356	6.72796e-184	7.85693e-182
14268	Fn1	-2.54928	14.264	832.219	5.33739e-183	6.18616e-181
76976	Arxes2	3.10589	5.29186	828.895	2.8174e-182	3.24106e-180
24136	Zeb2	2.01627	7.34997	827.698	5.131e-182	5.85885e-180
227095	Hibch	2.32302	5.58383	823.805	3.60269e-181	4.0835e-179
20787	Srebf1	2.36066	8.39229	812.216	1.1915e-178	1.34065e-176
69217	Plekha4	-2.81021	6.14951	811.959	1.35525e-178	1.51385e-176
12332	Capg	-1.9543	6.66397	808.911	6.23368e-178	6.91311e-176
57435	Plin4	3.01929	7.20795	802.177	1.81457e-176	1.99797e-174
75104	Mmd2	12.1295	3.03454	798.178	1.3433e-175	1.46858e-173
19128	Pros1	-1.92469	7.04346	796.861	2.59751e-175	2.81977e-173
215798	Adgrg6	-2.75267	5.51804	793.227	1.60216e-174	1.72708e-172
73822	Mfsd12	2.59272	5.37771	792.226	2.64348e-174	2.82981e-172
320712	Abi3bp	-2.2708	10.1205	791.807	3.26072e-174	3.46649e-172
56078	Car5b	3.52356	7.21438	788.631	1.59903e-173	1.6883e-171
14165	Fgf10	5.36529	3.64227	786.167	5.4921e-173	5.75923e-171
14732	Gpam	3.01085	6.98264	783.693	1.8944e-172	1.97312e-170
50772	Mapk6	2.16141	8.15224	781.158	6.73924e-172	6.97217e-170
11637	Ak2	2.15929	6.81873	781.106	6.91994e-172	7.11139e-170
16666	Krt16	9.94172	3.20605	773.929	2.51527e-170	2.56774e-168
114249	Npnt	2.02745	8.5233	772.793	4.44034e-170	4.50314e-168
269831	Tspan12	4.37561	4.11519	766.034	1.30955e-168	1.3194e-166
15926	Idh1	2.13502	8.45251	764.562	2.73588e-168	2.73854e-166
269642	Nat8l	6.74798	3.48788	763.587	4.4571e-168	4.43266e-166
242377	Pm20d2	4.36875	4.09096	761.323	1.38483e-167	1.3684e-165
71939	Apol6	3.33179	5.28357	758.428	5.89936e-167	5.79227e-165
105005	Lratd1	2.32511	5.36019	755.905	2.08624e-166	2.03541e-164
14115	Fbln2	-2.05603	10.5346	747.703	1.26709e-164	1.22844e-162
394432	Ugt1a7c	3.41395	4.50001	744.846	5.29742e-164	5.10373e-162
14199	Fhl1	2.06319	7.46234	736.032	4.37049e-162	4.18454e-160
20649	Sntb1	2.90695	4.62088	733.729	1.38473e-161	1.31763e-159
338367	Myo1d	-2.2224	6.00076	729.911	9.36779e-161	8.85917e-159
78894	Aacs	2.15059	7.70579	724.46	1.435e-159	1.34881e-157
17294	Mest	1.88368	7.86714	723.814	1.98343e-159	1.853e-157
11459	Acta1	2.04008	7.10324	723.532	2.28348e-159	2.12047e-157
14218	Sh3pxd2a	1.97493	10.4207	723.239	2.64457e-159	2.44108e-157
12974	Cs	1.92895	8.80853	721.879	5.22419e-159	4.79351e-157
20280	Scp2	1.95021	8.82101	716.295	8.55518e-158	7.80344e-156
268903	Nrip1	1.90014	6.29534	711.495	9.46278e-157	8.58052e-155
66972	Slc25a23	2.46739	5.49496	711.183	1.1062e-156	9.97199e-155
13685	Eif4ebp1	2.54013	6.40954	709.606	2.43717e-156	2.18424e-154
104158	Ces1d	9.20914	2.95331	708.912	3.44919e-156	3.07337e-154
12389	Cav1	2.18371	9.95498	708.338	4.59749e-156	4.073e-154
70021	Nt5dc2	2.2014	6.21008	707.167	8.26496e-156	7.28025e-154
245945	Rbm47	5.03932	3.45405	705.063	2.36993e-155	2.07571e-153
11430	Acox1	1.83336	8.09437	701.425	1.46494e-154	1.27582e-152
15483	Hsd11b1	2.9372	5.08456	700.919	1.88758e-154	1.63466e-152
74511	Lrrc17	2.59236	5.947	698.988	4.963e-154	4.274e-152
78283	Map7d2	6.87928	3.02137	697.239	1.19165e-153	1.02051e-151
108099	Prkag2	2.19168	5.68363	695.782	2.47098e-153	2.10443e-151
12830	Col4a5	-2.57829	6.88228	691.491	2.11885e-152	1.79462e-150
22228	Ucp2	3.40188	4.6991	691.396	2.22161e-152	1.87137e-150
67916	Plpp3	1.87685	9.88857	685.225	4.88178e-151	4.08981e-149
17449	Mdh1	2.08765	8.26417	682.364	2.04544e-150	1.70435e-148
108958	Miga2	1.88903	6.15481	679.24	9.77635e-150	8.10228e-148
102103	Mtus1	1.86759	6.58003	678.729	1.26283e-149	1.04099e-147
18113	Nnmt	2.58054	5.00373	674.939	8.42414e-149	6.90734e-147
70757	Hacd2	1.84568	6.52162	674.368	1.12151e-148	9.14713e-147
14775	Gpx1	1.97103	9.00984	671.576	4.53779e-148	3.68158e-146
231549	Lrrc8d	3.13371	4.45554	668.529	2.0869e-147	1.68427e-145
17524	Mpp1	1.75543	7.15186	667.814	2.98499e-147	2.39655e-145
227700	Sh3glb2	2.00179	6.89242	666.995	4.49999e-147	3.59416e-145
63955	Cables1	2.24347	5.33069	666.095	7.06161e-147	5.61107e-145
50915	Grb14	-2.36536	6.73556	664.05	1.96576e-146	1.55396e-144
20341	Selenbp1	1.91386	6.09142	663.125	3.12447e-146	2.45734e-144
11364	Acadm	1.97431	7.45955	660.374	1.23849e-145	9.691e-144
20656	Sod2	1.78369	6.65566	658.733	2.81759e-145	2.19359e-143
11522	Adh1	3.68591	4.69331	658.234	3.61652e-145	2.80144e-143
13177	Eci1	2.17694	5.89189	653.885	3.19289e-144	2.46092e-142
100705	Acacb	3.1058	4.55063	644.677	3.21184e-142	2.46321e-140
18452	P4ha2	-1.6651	7.03367	640.863	2.16862e-141	1.65491e-139
60525	Acss2	2.3595	5.74538	639.692	3.89935e-141	2.96101e-139
330812	Rnf150	-2.31124	5.65202	638.922	5.73395e-141	4.33279e-139
19016	Pparg	3.31431	7.21643	637.936	9.39224e-141	7.06251e-139
21802	Tgfa	4.16747	5.16275	635.624	2.99e-140	2.23742e-138
14705	Bscl2	1.87785	6.77706	634.217	6.04937e-140	4.50488e-138
68070	Pdzd2	2.06559	7.0234	631.196	2.74621e-139	2.03523e-137
226101	Myof	-2.29246	7.44919	630.576	3.74608e-139	2.76296e-137
14745	Lpar1	-1.77662	6.64847	630.551	3.7927e-139	2.78402e-137
19288	Ptx3	-2.72038	8.23276	629.018	8.17502e-139	5.97242e-137
14245	Lpin1	1.70431	6.56287	628.239	1.20708e-138	8.77693e-137
22234	Ugcg	-1.77439	7.17608	626.609	2.73139e-138	1.97673e-136
72512	Sting1	-2.57999	4.88311	622.34	2.31635e-137	1.66853e-135
23993	Klk7	8.39011	3.01044	620.738	5.16724e-137	3.70479e-135
11816	Apoe	2.40163	9.3822	619.168	1.13453e-136	8.09663e-135
627626	Ptchd4	3.33072	4.3442	614.864	9.79116e-136	6.95534e-134
12702	Socs3	-2.2974	5.69952	614.665	1.08195e-135	7.65058e-134
71934	Car13	1.79376	6.51623	614.553	1.14439e-135	8.05517e-134
235339	Dlat	1.74607	7.21662	606.582	6.19662e-134	4.34186e-132
237847	Rtn4rl1	4.48729	3.91811	605.62	1.0034e-133	6.99885e-132
12813	Col10a1	2.72352	4.65856	604.311	1.93238e-133	1.34178e-131
84004	Mcam	5.35679	6.5323	601.979	6.21224e-133	4.29425e-131
11429	Aco2	1.78316	8.63602	596.104	1.17826e-131	8.10841e-130
244757	Glb1l2	6.92706	3.05015	594.459	2.68588e-131	1.84013e-129
70717	Medag	-2.30214	6.15086	592.261	8.07322e-131	5.50658e-129
71881	Apmap	1.9387	6.19237	592.217	8.25563e-131	5.60619e-129
56357	Ivd	1.74154	7.70438	592.169	8.45347e-131	5.71536e-129
19301	Pxmp2	4.76585	3.33487	590.769	1.70462e-130	1.14745e-128
68339	Ccdc88c	4.9708	3.23604	589.571	3.10542e-130	2.08131e-128
23921	Sh2b2	3.34793	4.58216	589.503	3.21394e-130	2.14471e-128
13713	Elk3	-2.05959	5.50162	588.668	4.88152e-130	3.24347e-128
11761	Aox1	2.38761	4.76547	584.968	3.11566e-129	2.06128e-127
64540	Tspan4	-1.62381	7.26469	582.494	1.07535e-128	7.084e-127
14874	Gstz1	2.96617	7.16667	581.156	2.1025e-128	1.37915e-126
15107	Hadh	1.921	7.01881	579.679	4.40524e-128	2.87741e-126
21923	Tnc	-3.08716	7.99438	578.668	7.30718e-128	4.75275e-126
68263	Pdhb	1.85323	7.24348	575.223	4.10415e-127	2.65822e-125
56349	Net1	1.66349	7.22285	573.469	9.87983e-127	6.37228e-125
107476	Acaca	1.79851	7.82568	570.462	4.45549e-126	2.86173e-124
22272	Uqcrq	1.85038	6.52069	568.67	1.09299e-125	6.99107e-124
66214	Rgcc	1.8646	5.83548	567.446	2.01799e-125	1.28543e-123
64293	Stk32b	2.78732	4.58142	567.28	2.19324e-125	1.39131e-123
21881	Tkt	1.68582	8.1635	564.115	1.07026e-124	6.76151e-123
104776	Aldh6a1	2.10601	7.91106	558.172	2.10008e-123	1.32134e-121
11492	Adam19	1.77665	5.9531	555.877	6.63115e-123	4.15525e-121
14600	Ghr	1.70402	8.68765	553.54	2.13798e-122	1.33429e-120
67834	Idh3a	1.64844	6.7953	553.082	2.68894e-122	1.67137e-120
140559	Igsf8	-1.90766	5.79984	552.376	3.82833e-122	2.37003e-120
15902	Id2	1.95979	7.09862	552.01	4.59979e-122	2.83623e-120
66469	Prxl2b	2.3826	4.73385	551.138	7.12055e-122	4.37304e-120
102632	Acad11	1.76811	5.92611	550.361	1.05085e-121	6.42811e-120
12359	Cat	1.72023	9.19541	550.087	1.20537e-121	7.34415e-120
12411	Cbs	4.29846	3.40026	548.321	2.91909e-121	1.77157e-119
18647	Cdk14	1.97964	5.82795	547.329	4.79668e-121	2.89964e-119
67041	Oxct1	1.73904	8.57208	545.712	1.07862e-120	6.49488e-119
56398	Chp1	1.74732	8.82535	545.269	1.34618e-120	8.07444e-119
59126	Nek6	-1.66694	6.61835	545.054	1.4997e-120	8.96039e-119
494504	Apcdd1	4.24854	5.58186	545	1.54039e-120	9.16799e-119
320508	Cachd1	2.17927	4.98243	543.444	3.35843e-120	1.99116e-118
18451	P4ha1	-1.66912	7.97436	542.939	4.32588e-120	2.55492e-118
16180	Il1rap	-2.04034	6.29126	542.711	4.8502e-120	2.85366e-118
21859	Timp3	-1.81906	10.2253	541.622	8.36684e-120	4.90398e-118
11740	Slc25a5	1.89168	8.42263	540.236	1.67548e-119	9.78317e-118
13609	S1pr1	2.09692	5.69526	539.505	2.41626e-119	1.40554e-117
68404	Nrn1	2.16756	5.62127	539.152	2.88387e-119	1.67124e-117
67680	Sdhb	1.60933	6.90207	538.284	4.45311e-119	2.57096e-117
17992	Ndufa4	1.76251	6.83348	537.911	5.36854e-119	3.08791e-117
18984	Por	1.70868	6.78061	536.431	1.12707e-118	6.45868e-117
64075	Smoc1	1.63598	8.70354	535.41	1.87921e-118	1.07289e-116
68655	Fndc1	-2.10006	5.27179	535.081	2.21544e-118	1.26019e-116
14461	Gata2	1.65435	6.30834	534.321	3.24193e-118	1.83729e-116
381290	Atp2b4	1.88767	5.69988	533.405	5.1319e-118	2.89774e-116
67273	Ndufa10	1.62249	6.93542	532.637	7.53972e-118	4.24178e-116
16449	Jag1	2.08913	6.35054	531.929	1.07483e-117	6.02494e-116
384783	Irs2	1.73852	6.3324	530.836	1.85788e-117	1.03765e-115
66445	Cyc1	1.85736	7.14689	530.136	2.63871e-117	1.46844e-115
14667	Gm2a	1.63843	7.63446	528.975	4.72092e-117	2.61773e-115
239463	Fam83a	8.41389	2.50066	525.662	2.48127e-116	1.37093e-114
23943	Esyt1	1.50129	7.26645	523.123	8.8511e-116	4.87285e-114
66141	Ifitm3	-2.09046	7.757	522.878	1.00083e-115	5.49031e-114
231162	Cytl1	2.51819	6.75834	522	1.55352e-115	8.49203e-114
252864	Dusp15	6.01522	2.94996	518.277	1.00319e-114	5.46436e-113
71207	Nudt4	1.79109	8.43764	518.186	1.05009e-114	5.69968e-113
11535	Adm	-2.32473	6.51183	516.503	2.44005e-114	1.31977e-112
16364	Irf4	9.20734	2.44423	515.531	3.97129e-114	2.14047e-112
94249	Slc24a3	2.72725	4.4838	515.148	4.81005e-114	2.58352e-112
78754	Galnt15	2.54527	4.72217	514.717	5.96917e-114	3.19496e-112
14194	Fh1	1.58767	6.85263	514.473	6.74462e-114	3.59752e-112
118449	Synpo2	2.5525	4.556	514.407	6.97244e-114	3.70621e-112
20308	Ccl9	2.79248	7.59128	514.089	8.17732e-114	4.33173e-112
74137	Nuak2	-2.62125	4.77647	513.194	1.28045e-113	6.75966e-112
223272	Itgbl1	-2.40055	5.30431	512.28	2.02423e-113	1.06497e-111
12338	Capn6	-1.69101	6.62074	512.173	2.13535e-113	1.11961e-111
56348	Hsd17b12	1.56764	7.00328	510.945	3.94951e-113	2.06379e-111
213945	Col28a1	-2.40172	5.37913	510.488	4.96698e-113	2.58669e-111
330189	Tmem120b	2.97207	3.87489	509.824	6.9281e-113	3.59585e-111
64085	Clstn2	5.69658	3.84579	509.394	8.59022e-113	4.44357e-111
20583	Snai2	1.94573	7.00372	508.459	1.37217e-112	7.07427e-111
17082	Il1rl1	-7.27426	8.22311	508.173	1.58383e-112	8.13825e-111
20778	Scarb1	1.80759	6.74293	507.727	1.98047e-112	1.01425e-110
12683	Cidea	4.13299	3.75266	507.065	2.75897e-112	1.40826e-110
73181	Nfatc4	-1.71112	6.05671	506.918	2.96975e-112	1.51085e-110
68792	Srpx2	-2.0358	7.12134	506.411	3.82967e-112	1.94192e-110
21922	Clec3b	2.78105	4.70881	503.989	1.28859e-111	6.51267e-110
73699	Ppp2r1b	1.58332	6.68716	502.45	2.7849e-111	1.40292e-109
381308	Ifi211	-3.008	4.01983	501.675	4.10779e-111	2.06259e-109
223775	Pim3	1.7781	6.61883	501.08	5.53326e-111	2.76932e-109
232334	Vgll4	1.47043	7.10818	501.054	5.60566e-111	2.79648e-109
100042178	Prdm16os	3.90667	3.93266	500.812	6.32779e-111	3.14654e-109
16832	Ldhb	1.50187	7.8934	500.207	8.56751e-111	4.24656e-109
21857	Timp1	-4.02193	6.85018	499.262	1.37593e-110	6.79809e-109
67914	Coq9	1.54294	6.21483	499.099	1.49307e-110	7.35327e-109
66218	Ndufb9	1.8056	6.68512	497.91	2.70901e-110	1.32992e-108
21351	Taldo1	1.58864	7.42061	496.921	4.44453e-110	2.175e-108
210789	Tbc1d4	2.01292	5.37467	495.805	7.77585e-110	3.79319e-108
55987	Cpxm2	-2.23565	7.83562	494.72	1.33935e-109	6.51296e-108
14712	Gnpat	1.45273	6.93557	493.485	2.48604e-109	1.2051e-107
11982	Atp10a	-2.08293	5.15585	492.048	5.10725e-109	2.46797e-107
56277	Tmem45a	-1.79342	6.19735	491.632	6.29173e-109	3.03084e-107
15258	Hipk2	1.57842	6.29573	491.474	6.80959e-109	3.27009e-107
66058	Tmem176a	-1.6058	6.01495	491.402	7.05765e-109	3.37869e-107
17263	Meg3	-1.75003	7.17439	489.8	1.57534e-108	7.51823e-107
26874	Abcd2	3.54736	3.45871	487.508	4.96658e-108	2.36296e-106
19141	Lgmn	-1.47391	6.66493	486.984	6.45602e-108	3.06214e-106
20753	Sprr1a	6.29625	2.80238	486.618	7.75694e-108	3.66789e-106
18606	Enpp2	4.98782	6.73733	485.294	1.50621e-107	7.10039e-106
330064	Slc5a6	2.54925	4.40846	484.059	2.79536e-107	1.31373e-105
121022	Mrps6	1.6314	6.55391	483.613	3.49606e-107	1.63805e-105
15510	Hspd1	1.56189	8.54526	482.701	5.52067e-107	2.57882e-105
68750	Rreb1	1.61473	6.98941	481.049	1.26318e-106	5.88275e-105
14265	Fmr1	1.62568	7.39362	479.971	2.16749e-106	1.00638e-104
100604	Lrrc8c	-1.86913	5.44109	479.269	3.08223e-106	1.4268e-104
107587	Osr2	2.69205	4.20171	478.956	3.60517e-106	1.66388e-104
239337	Adamts12	1.9361	5.6206	478.045	5.68976e-106	2.61814e-104
67664	Rnf125	3.68247	3.25004	475.546	1.99019e-105	9.13061e-104
12837	Col8a1	-1.6746	10.0985	472.655	8.47348e-105	3.87592e-103
12842	Col1a1	-1.57465	11.1934	472.595	8.73038e-105	3.98162e-103
69121	Chrdl2	-6.16816	2.72452	471.853	1.2663e-104	5.75813e-103
94190	Ophn1	1.94104	5.68292	471.153	1.79797e-104	8.15166e-103
17926	Myoc	4.85462	4.92649	470.07	3.09354e-104	1.39844e-102
98845	Eps8l2	-3.10057	3.81758	468.521	6.72408e-104	3.03075e-102
58207	Slc43a3	-1.74582	6.17336	468.48	6.86371e-104	3.08467e-102
66694	Uqcrfs1	1.90564	7.02294	466.877	1.53235e-103	6.86663e-102
18791	Plat	-2.34689	4.51074	466.731	1.64891e-103	7.36751e-102
16195	Il6st	-1.62677	10.1675	465.242	3.47679e-103	1.54898e-101
231470	Fras1	4.58509	3.14956	463.681	7.60228e-103	3.37721e-101
243270	Hcar1	5.60704	4.05325	463.279	9.29475e-103	4.1172e-101
50909	C1ra	-1.68774	6.93312	461.079	2.79938e-102	1.23646e-100
11603	Agrn	-1.47349	7.66195	460.907	3.05152e-102	1.34398e-100
320078	Olfml2b	1.43193	6.64774	460.895	3.06918e-102	1.3479e-100
70456	Mpc2	1.60871	6.43999	459.765	5.40844e-102	2.3685e-100
72472	Slc16a10	3.82372	3.5005	459.739	5.47779e-102	2.39207e-100
69635	Dapk1	1.47467	8.36137	458.319	1.11587e-101	4.85907e-100
98932	Myl9	1.54587	8.41518	458.058	1.27231e-101	5.5247e-100
328967	Arhgef37	4.66295	2.79681	457.816	1.43601e-101	6.21799e-100
13382	Dld	1.59093	7.40878	457.691	1.52926e-101	6.60321e-100
244416	Ppp1r3b	2.82999	5.60799	456.072	3.44169e-101	1.48194e-99
12490	Cd34	-2.82658	4.2725	454.831	6.40951e-101	2.75216e-99
19125	Prodh	3.46979	3.33176	450.635	5.24677e-100	2.24664e-98
70152	Mettl7a1	1.51665	6.89017	449.597	8.82744e-100	3.76939e-98
12364	Casp12	-1.584	6.13117	446.988	3.26319e-99	1.38956e-97
215113	Slc43a2	1.94354	5.52032	446.234	4.76011e-99	2.02141e-97
17901	Myl1	1.70813	6.13302	446.051	5.2195e-99	2.2104e-97
53881	Slc5a3	2.03318	8.50312	444.939	9.11145e-99	3.84803e-97
16981	Lrrn3	2.61238	4.13977	443.792	1.61871e-98	6.81759e-97
14261	Fmo1	4.05392	6.40709	443.294	2.0775e-98	8.72608e-97
241327	Olfml2a	2.19211	5.81577	441.217	5.88171e-98	2.46377e-96
67477	Abhd15	5.33232	3.3842	440.561	8.17283e-98	3.4142e-96
64817	Svep1	-1.8355	10.0476	435.758	9.07365e-97	3.78028e-95
170439	Elovl6	1.5199	6.28967	434.569	1.64608e-96	6.83944e-95
381413	Gpr176	-1.68486	5.85211	433.036	3.54939e-96	1.4708e-94
110595	Timp4	3.18787	3.90032	432.766	4.0632e-96	1.6792e-94
19122	Prnp	1.56301	8.72612	431.666	7.05104e-96	2.9062e-94
13167	Dbi	2.66875	8.91209	431.326	8.36061e-96	3.43677e-94
19258	Ptpn4	1.63639	5.96287	430.974	9.97297e-96	4.08865e-94
101401	Adamts9	1.78163	7.32788	429.832	1.76814e-95	7.22969e-94
110821	Pcca	1.71663	5.90488	429.581	2.00532e-95	8.17776e-94
78892	Crispld2	2.64997	6.29029	429.005	2.67574e-95	1.0883e-93
66895	Pxdc1	-1.93262	5.29407	428.985	2.70327e-95	1.0966e-93
226849	Ppp2r5a	1.49254	6.87546	428.939	2.76592e-95	1.11907e-93
171508	Creld1	1.92168	5.89205	428.483	3.47588e-95	1.40263e-93
18619	Penk	-1.81269	10.3074	428.216	3.97412e-95	1.5995e-93
76137	Mcur1	1.81191	5.41949	427.881	4.69959e-95	1.88657e-93
93747	Echs1	1.54059	6.98267	427.663	5.24306e-95	2.09927e-93
244654	Mtss2	1.45957	8.26127	427.127	6.85848e-95	2.73895e-93
12816	Col12a1	-1.74013	8.75884	426.189	1.09741e-94	4.3712e-93
140792	Colec12	-1.44964	9.13642	426.013	1.19886e-94	4.763e-93
14585	Gfra1	-1.41212	7.05856	425.609	1.46765e-94	5.81588e-93
231207	Cpeb2	1.71585	5.81785	424.88	2.11505e-94	8.35986e-93
20499	Slc12a7	1.61745	5.65777	423.418	4.40099e-94	1.73507e-92
11568	Aebp1	-1.89886	10.416	418.586	4.95599e-93	1.94889e-91
16859	Lgals9	-2.16602	4.65513	418.256	5.84785e-93	2.29376e-91
229211	Acad9	1.52698	6.54133	417.434	8.82968e-93	3.45456e-91
16403	Itga6	2.76293	6.20972	414.818	3.27677e-92	1.27877e-90
100129	Gpr153	-1.44488	6.54323	413.535	6.23218e-92	2.42599e-90
13823	Epb41l3	-1.89537	5.61178	412.111	1.27221e-91	4.93981e-90
20393	Sgk1	-2.24254	6.41721	411.91	1.40713e-91	5.44999e-90
20363	Selenop	1.60677	8.95221	411.332	1.8801e-91	7.26359e-90
170718	Idh3b	1.53237	7.1788	411.232	1.97676e-91	7.61792e-90
53623	Gria3	-1.71452	5.23463	410.927	2.30283e-91	8.85239e-90
14230	Fkbp10	-1.39293	6.94499	409.785	4.08206e-91	1.5653e-89
171212	Galnt10	-1.35782	6.86616	408.234	8.88343e-91	3.39797e-89
234729	Vac14	1.54096	5.67372	407.238	1.46309e-90	5.58254e-89
216848	Chd3	-1.40473	7.67529	405.571	3.37518e-90	1.28465e-88
72759	Tmem135	1.5027	5.85654	402.797	1.35534e-89	5.14596e-88
53614	Reck	-1.63018	8.32091	402.429	1.6303e-89	6.17472e-88
18795	Plcb1	2.01432	4.8421	401.988	2.0329e-89	7.68068e-88
212647	Aldh4a1	2.04414	5.57033	401.467	2.63934e-89	9.94752e-88
106572	Rab31	-1.39764	6.5815	401.173	3.05923e-89	1.1502e-87
13400	Dmpk	1.39048	6.53016	400.917	3.47786e-89	1.30441e-87
13835	Epha1	-3.91564	3.61215	400.685	3.90746e-89	1.46198e-87
22057	Tob1	1.37245	6.32794	399.098	8.65509e-89	3.23047e-87
14381	G6pdx	1.33433	7.2646	398.731	1.04039e-88	3.87384e-87
57319	Smpdl3a	-1.72324	5.19604	396.838	2.68738e-88	9.98217e-87
27357	Gyg	1.52056	6.22071	396.777	2.77089e-88	1.02676e-86
243725	Ppp1r9a	2.52334	3.9578	396.724	2.84502e-88	1.0517e-86
109731	Maob	2.10995	4.80503	396.358	3.41804e-88	1.2605e-86
269855	Ssc5d	-2.55675	4.19552	396.347	3.43719e-88	1.26454e-86
11752	Anxa8	3.80828	7.17388	395.936	4.22276e-88	1.54985e-86
110446	Acat1	1.39694	7.52352	395.159	6.23392e-88	2.28256e-86
233744	Spon1	3.54036	3.41122	394.566	8.39167e-88	3.06535e-86
192199	Rspo1	2.90937	3.64297	394.462	8.83929e-88	3.22122e-86
11830	Aqp5	2.53079	4.09641	393.016	1.82545e-87	6.63664e-86
16590	Kit	7.25874	2.87531	391.606	3.69972e-87	1.34191e-85
20198	S100a4	-1.54151	7.38536	391.362	4.18194e-87	1.51325e-85
27410	Abca3	1.55151	5.67905	390.592	6.15154e-87	2.22075e-85
26362	Axl	-1.48571	7.68381	390.475	6.523e-87	2.34935e-85
20181	Rxra	1.30301	7.71092	390.307	7.09748e-87	2.5503e-85
384071	Slc25a34	5.91272	2.28908	390.12	7.79443e-87	2.79421e-85
22402	Ccn4	-2.50208	4.32049	387.54	2.84111e-86	1.01614e-84
13644	Efs	2.63843	4.33806	387.084	3.57043e-86	1.27403e-84
666048	Trabd2b	1.33608	6.79608	386.988	3.74702e-86	1.33396e-84
78920	Dlst	1.31393	7.63134	386.677	4.37762e-86	1.55486e-84
22433	Xbp1	1.36274	7.62076	385.918	6.40426e-86	2.26946e-84
12843	Col1a2	-1.5679	11.9013	385.818	6.73378e-86	2.38076e-84
140570	Plxnb2	-1.35188	8.25956	385.375	8.40987e-86	2.96655e-84
20324	Cavin2	1.33518	6.70605	384.166	1.54166e-85	5.42573e-84
77590	Chst15	1.9678	5.25526	384.133	1.56751e-85	5.50415e-84
108079	Prkaa2	3.0684	3.5529	382.302	3.92391e-85	1.3747e-83
228662	Btbd3	-1.44847	7.65683	381.93	4.72927e-85	1.6531e-83
12039	Bckdha	1.4063	6.64051	381.742	5.19726e-85	1.81257e-83
18611	Pea15a	-1.28309	6.7796	380.465	9.85498e-85	3.42922e-83
28080	Atp5o	1.41091	7.30025	380.397	1.01979e-84	3.54055e-83
12390	Cav2	1.54683	6.69759	380.346	1.0463e-84	3.62442e-83
72301	Shisal1	4.01402	2.87357	379.377	1.70092e-84	5.87884e-83
101631	Pwwp2b	2.78735	3.96305	376.81	6.15812e-84	2.12365e-82
216197	Ckap4	-1.35621	7.63494	374.994	1.53025e-83	5.26537e-82
54338	Slc23a2	1.77257	6.6955	374.985	1.53786e-83	5.27977e-82
16480	Jup	1.53084	5.74594	374.192	2.28761e-83	7.83632e-82
21835	Thrsp	8.99939	6.59175	373.887	2.66679e-83	9.115e-82
12409	Cbr2	4.45136	6.98538	373.845	2.72346e-83	9.28808e-82
109620	Dsp	8.59291	2.44428	372.816	4.56047e-83	1.55187e-81
21366	Slc6a6	1.36364	9.5099	372.563	5.17704e-83	1.7578e-81
15904	Id4	1.97543	5.08374	372.085	6.58023e-83	2.22932e-81
22273	Uqcrc1	1.37888	7.84547	371.53	8.68969e-83	2.93753e-81
18783	Pla2g4a	-1.68148	5.45767	370.973	1.14903e-82	3.87579e-81
15551	Htr1b	3.81425	2.96525	370.775	1.26906e-82	4.2713e-81
215615	Rnpep	1.68612	5.88391	370.614	1.37558e-82	4.61975e-81
20203	S100b	1.71536	5.15372	370.528	1.43611e-82	4.81255e-81
104080	Nxph4	-3.40599	4.13449	369.534	2.3644e-82	7.90613e-81
107221	Ffar4	5.49517	2.57724	368.237	4.52863e-82	1.51101e-80
18633	Pex16	2.35914	5.08701	366.374	1.15238e-81	3.8367e-80
27280	Phlda3	1.25908	7.03715	365.952	1.42402e-81	4.73087e-80
215512	Fam117a	1.93004	4.58976	365.856	1.49476e-81	4.95522e-80
71795	Pitpnc1	1.63574	5.2839	365.42	1.85978e-81	6.15203e-80
117160	Ttyh2	1.51158	5.87666	365.001	2.29438e-81	7.57342e-80
211577	Mrgprf	-1.52705	5.65198	363.893	3.99933e-81	1.3173e-79
107869	Cth	3.39472	3.26778	362.393	8.48445e-81	2.78865e-79
15901	Id1	1.46063	7.05979	362.347	8.68042e-81	2.84699e-79
226777	C130074G19Rik	4.24365	3.11534	362.266	9.04008e-81	2.95866e-79
12552	Cdh11	1.49497	9.15292	361.98	1.04332e-80	3.40738e-79
11931	Atp1b1	2.28351	5.35768	361.701	1.19985e-80	3.91031e-79
28169	Agpat3	1.30204	6.93826	360.386	2.32034e-80	7.546e-79
12038	Bche	7.89993	1.97629	359.453	3.70444e-80	1.20219e-78
16826	Ldb2	4.85044	4.75404	359.065	4.49914e-80	1.45702e-78
67283	Slc25a19	1.9863	5.02376	358.633	5.58697e-80	1.80552e-78
58875	Hibadh	1.50092	6.7136	358.541	5.85061e-80	1.88676e-78
12305	Ddr1	-1.5985	6.84562	358.151	7.11386e-80	2.28936e-78
11433	Acp5	3.09932	4.32472	357.855	8.25527e-80	2.65114e-78
56198	Heyl	6.87899	2.39593	357.755	8.67859e-80	2.7813e-78
66864	Clec14a	2.65496	3.77793	355.724	2.40309e-79	7.68539e-78
99543	Olfml3	-1.9977	4.95898	355.659	2.48203e-79	7.92142e-78
12857	Cox4i1	1.37991	8.1369	355.322	2.93982e-79	9.36309e-78
18414	Osmr	-1.48102	8.26127	354.767	3.88158e-79	1.2337e-77
213417	Klhdc8a	-1.76023	5.14845	354.631	4.15532e-79	1.31799e-77
269633	Wdr86	2.02205	4.69033	354.212	5.12794e-79	1.62315e-77
72043	Sulf2	1.40732	7.6586	354.023	5.63791e-79	1.78091e-77
233328	Lrrk1	-1.43965	6.32337	353.195	8.53935e-79	2.6919e-77
18605	Enpp1	-1.63283	5.47801	352.176	1.42324e-78	4.47741e-77
12349	Car2	4.74671	3.16316	352.081	1.49243e-78	4.68551e-77
66142	Cox7b	1.33853	6.43651	351.586	1.91292e-78	5.99342e-77
66528	Smim5	3.67829	2.83869	350.93	2.65819e-78	8.31158e-77
54445	Unc93b1	-1.86082	4.72039	350.507	3.28663e-78	1.02558e-76
70885	Ints10	1.48854	5.7964	350.247	3.74386e-78	1.16589e-76
14184	Fgfr3	2.01789	5.40316	350.21	3.81418e-78	1.1854e-76
14178	Fgf7	-1.21575	7.63825	350.198	3.83703e-78	1.1901e-76
94185	Tnfrsf21	2.55231	3.65689	348.478	9.08805e-78	2.8131e-76
26408	Map3k5	2.86763	4.14957	347.812	1.26948e-77	3.92165e-76
53883	Celsr2	2.7478	3.61663	347.652	1.37516e-77	4.23962e-76
66594	Uqcr11	1.79328	5.87983	347.073	1.83914e-77	5.65875e-76
20775	Sqle	1.43782	6.77194	346.904	2.00172e-77	6.14672e-76
75909	Vmp1	-1.22935	7.60123	346.642	2.28283e-77	6.99599e-76
74147	Ehhadh	2.13794	4.44805	346.409	2.56513e-77	7.84553e-76
54725	Cadm1	5.16355	2.29752	346.325	2.67603e-77	8.16851e-76
18583	Pde7a	-1.45583	5.94855	346.169	2.89348e-77	8.81482e-76
252837	Ackr4	2.66062	4.4114	346.045	3.07891e-77	9.36123e-76
76566	Rflnb	-1.28811	6.58745	345.033	5.11439e-77	1.55194e-75
77446	Heg1	-1.41258	7.42746	343.343	1.1937e-76	3.61512e-75
14089	Fap	2.7426	3.41798	343.171	1.30091e-76	3.93207e-75
19017	Ppargc1a	4.17283	3.44999	343.055	1.37925e-76	4.16069e-75
71145	Scara5	1.93204	6.05524	343.045	1.38569e-76	4.17194e-75
214048	Larp1b	2.55047	3.82095	342.119	2.20519e-76	6.62632e-75
76199	Med13l	-1.31797	7.67525	342.063	2.26822e-76	6.80246e-75
11655	Alas1	1.46448	6.21103	340.811	4.24847e-76	1.27165e-74
19225	Ptgs2	-3.58501	4.33024	337.632	2.09175e-75	6.24891e-74
329628	Fat4	1.80025	8.69237	337.021	2.8419e-75	8.47347e-74
18212	Ntrk2	2.34059	6.14366	337.011	2.85601e-75	8.4991e-74
76252	Atp6v0e2	3.87066	3.03152	336.721	3.30362e-75	9.8122e-74
270685	Mthfd1l	-2.09556	4.48659	336.656	3.41224e-75	1.01153e-73
11735	Ank3	-2.94889	5.35221	335.632	5.70295e-75	1.68735e-73
68133	Gcsh	1.40947	5.97614	335.052	7.62997e-75	2.25318e-73
235320	Zbtb16	3.78776	2.98437	334.97	7.94964e-75	2.34309e-73
74340	Ahcyl2	1.3533	6.09016	334.639	9.38676e-75	2.76139e-73
78558	Htra3	1.73383	5.26198	334.586	9.63728e-75	2.82969e-73
13591	Ebf1	1.23643	7.97807	334.511	1.00086e-74	2.93314e-73
70316	Ndufab1	1.54525	6.65693	332.436	2.83257e-74	8.28541e-73
15526	Hspa9	1.29196	8.54381	331.867	3.76932e-74	1.10046e-72
12896	Cpt2	1.22706	6.58516	330.933	6.0196e-74	1.7541e-72
12226	Btg1	1.47006	7.40473	329.024	1.56798e-73	4.56044e-72
73102	Slc22a23	3.51763	3.46163	327.46	3.43482e-73	9.97132e-72
353211	Prune2	1.59261	5.57463	327.103	4.10863e-73	1.1905e-71
73246	Rassf6	4.39515	2.5353	326.772	4.85083e-73	1.40292e-71
384009	Glipr2	-1.36505	6.14885	326.306	6.12944e-73	1.76939e-71
54667	Atp8b2	-1.18545	7.2547	326.229	6.36925e-73	1.83518e-71
277414	Trp53i11	2.36228	4.61699	325.817	7.83082e-73	2.25209e-71
68588	Cthrc1	-3.35018	3.40177	325.669	8.43524e-73	2.4214e-71
56496	Tspan6	-1.54949	7.65978	325.649	8.52152e-73	2.44162e-71
22337	Vdr	-2.78815	4.28658	325.587	8.79049e-73	2.51401e-71
217344	Rhbdf2	2.44435	3.96218	325.558	8.9181e-73	2.54579e-71
17161	Maoa	1.4206	6.8801	324.41	1.58592e-72	4.51885e-71
104943	Fam110c	3.52464	2.94334	324.362	1.62482e-72	4.62113e-71
65963	Tmem176b	-1.17814	6.98737	324.353	1.63175e-72	4.63232e-71
60613	Kcnq4	3.23002	3.0235	324.27	1.70158e-72	4.82165e-71
16664	Krt14	8.45448	4.9957	324.172	1.78746e-72	5.05573e-71
233335	Synm	2.74032	3.46941	324.115	1.83938e-72	5.19304e-71
20655	Sod1	1.33496	7.64513	323.913	2.03498e-72	5.73477e-71
111175	Pecr	2.07735	4.47991	323.742	2.21677e-72	6.23569e-71
54324	Arhgef5	-1.90485	4.75567	323.217	2.88541e-72	8.10176e-71
19144	Klk6	8.61732	1.87192	322.887	3.40394e-72	9.54031e-71
228966	Ppp1r3d	2.37799	4.27901	322.881	3.41549e-72	9.55532e-71
14789	P3h3	-1.38941	7.5447	322.587	3.95754e-72	1.10517e-70
11947	Atp5b	1.39442	10.0702	321.06	8.51054e-72	2.37233e-70
19340	Rab3d	1.87172	4.95058	320.826	9.56925e-72	2.66264e-70
19266	Ptprd	1.57393	5.24751	320.213	1.30197e-71	3.6162e-70
11932	Atp1b2	-1.94694	4.97497	320.075	1.39494e-71	3.86744e-70
242050	Igsf10	-2.8066	5.2739	319.289	2.0686e-71	5.72487e-70
12709	Ckb	1.26831	7.00265	318.923	2.48612e-71	6.86801e-70
18639	Pfkfb1	3.10221	3.80791	318.517	3.04774e-71	8.40447e-70
246049	Slc36a2	7.77661	6.13162	318.386	3.25517e-71	8.96044e-70
17311	Kitl	1.41494	6.36733	318.046	3.85902e-71	1.06037e-69
227197	Ndufs1	1.23752	6.82558	317.421	5.27984e-71	1.4482e-69
68349	Ndufs3	1.24464	6.17617	317.178	5.96552e-71	1.63337e-69
192198	Lrrc4	4.0844	2.55256	316.815	7.15526e-71	1.95564e-69
12580	Cdkn2c	1.38174	6.85075	316.668	7.70338e-71	2.10173e-69
103743	Tmem98	-1.1829	6.56884	315.837	1.16874e-70	3.18307e-69
66427	Cyb5b	1.23285	8.04157	315.397	1.45723e-70	3.96177e-69
20750	Spp1	-2.41344	10.8601	314.991	1.7864e-70	4.84814e-69
17448	Mdh2	1.35237	8.04232	314.951	1.82313e-70	4.9391e-69
14465	Gata6	3.13897	3.16658	314.37	2.43979e-70	6.59814e-69
76219	Arxes1	4.10023	2.384	313.714	3.39036e-70	9.1528e-69
244864	Layn	-2.55272	4.31586	313.058	4.70978e-70	1.26925e-68
101772	Ano1	3.63062	4.00922	312.289	6.92729e-70	1.8636e-68
217310	Hid1	1.98531	4.32306	312.193	7.26989e-70	1.95236e-68
12867	Cox7c	1.28706	6.94528	311.788	8.90842e-70	2.38823e-68
229003	Helz2	-1.73724	5.24514	311.701	9.30193e-70	2.4894e-68
68027	Tmem178	2.63292	5.05545	309.589	2.68444e-69	7.17168e-68
330863	Trim67	7.10554	2.12227	309.334	3.05076e-69	8.13624e-68
51797	Ctps	-1.17502	6.62183	308.751	4.08632e-69	1.08792e-67
11479	Acvr1b	-1.24458	6.58964	308.744	4.10057e-69	1.08983e-67
16658	Mafb	1.38368	7.226	308.702	4.18814e-69	1.11119e-67
14260	Fmn1	-1.84131	4.80087	308.678	4.23921e-69	1.12281e-67
217837	Itpk1	1.83171	4.5966	308.463	4.7223e-69	1.24861e-67
17995	Ndufv1	1.30618	6.56384	308.349	4.99961e-69	1.31967e-67
13819	Epas1	1.57628	5.37743	308.334	5.03723e-69	1.32733e-67
11640	Akap1	1.30491	6.37968	308.262	5.2231e-69	1.37396e-67
19229	Ptk2b	2.02856	4.19847	306.879	1.04496e-68	2.74413e-67
100952	Emilin1	-1.48433	8.40921	306.153	1.50431e-68	3.9437e-67
22628	Ywhag	1.23403	8.74861	305.831	1.76788e-68	4.62681e-67
73139	Cenpv	2.65356	3.41377	305.675	1.91211e-68	4.99579e-67
16950	Loxl3	-1.41295	6.03102	304.24	3.92764e-68	1.02444e-66
16008	Igfbp2	-1.51146	10.6539	304.04	4.34035e-68	1.13018e-66
68241	Mcrip2	3.31725	3.98854	303.849	4.77731e-68	1.24186e-66
56072	Lgals12	7.24124	4.8931	303.788	4.92516e-68	1.27814e-66
70804	Pgrmc2	1.18398	6.73973	303.561	5.51928e-68	1.42991e-66
329828	Myorg	1.57733	5.38465	302.51	9.35275e-68	2.419e-66
22245	Uck1	1.41233	6.00735	302.271	1.05425e-67	2.72215e-66
211401	Mtss1	1.18705	6.33975	301.988	1.21523e-67	3.13257e-66
67452	Pnpla8	1.40463	7.33271	301.083	1.91306e-67	4.92316e-66
17717	ND2	1.86044	11.3342	301.017	1.97744e-67	5.08037e-66
209378	Itih5	2.34794	3.62413	300.862	2.13778e-67	5.48317e-66
20256	Clec11a	-1.28911	6.91829	300.847	2.1545e-67	5.51687e-66
21825	Thbs1	-1.72115	12.4395	300.779	2.22852e-67	5.69696e-66
100042480	Nhsl2	1.97706	4.27437	300.574	2.46988e-67	6.30352e-66
110826	Etfb	1.41841	6.52194	299.978	3.33168e-67	8.4889e-66
229699	Slc16a4	-2.20438	3.98914	298.675	6.40446e-67	1.62912e-65
66925	Sdhd	1.34438	6.8573	298.103	8.53296e-67	2.16698e-65
246782	Atpaf2	1.4998	5.3469	297.88	9.54425e-67	2.41981e-65
14651	Hagh	1.65888	5.15547	297.756	1.01544e-66	2.57028e-65
74246	Gale	1.79328	5.21625	297.353	1.24325e-66	3.14177e-65
26922	Mecr	1.6814	4.84643	296.545	1.86383e-66	4.70228e-65
20454	St3gal5	-1.29489	5.7603	294.996	4.05537e-66	1.02146e-64
67533	Ppfibp1	-1.24947	7.96454	294.42	5.41377e-66	1.36139e-64
110532	Adarb1	1.57836	4.93457	293.412	8.97892e-66	2.25423e-64
233870	Tufm	1.33693	6.34409	292.447	1.45692e-65	3.65179e-64
246221	Mpst	2.30911	6.57675	291.961	1.8594e-65	4.65303e-64
52637	Cisd1	1.56282	5.13659	291.214	2.70472e-65	6.75741e-64
56526	Septin6	1.62657	5.01043	290.869	3.21577e-65	8.02122e-64
320827	Cracd	2.70275	3.41367	290.746	3.42001e-65	8.51688e-64
114301	Palmd	-1.22895	6.2843	290.286	4.30816e-65	1.07113e-63
16400	Itga3	-1.17621	6.19913	290.229	4.43204e-65	1.10016e-63
12819	Col15a1	6.64352	8.73985	289.95	5.0984e-65	1.26353e-63
77219	Ptgr2	1.1695	6.49133	289.94	5.12527e-65	1.26815e-63
19663	Rbpms	2.14214	5.2192	289.346	6.90423e-65	1.70559e-63
17850	Mmut	1.31163	6.52183	288.924	8.52991e-65	2.10382e-63
224008	Spidr	-1.48364	5.82842	288.613	9.97372e-65	2.45599e-63
12977	Csf1	-1.35346	8.52364	287.846	1.46509e-64	3.60197e-63
17716	ND1	1.49478	11.6743	287.181	2.04592e-64	5.02195e-63
12908	Crat	1.44955	6.65898	287.055	2.17898e-64	5.34006e-63
246277	Csad	1.17317	6.82982	286.945	2.30209e-64	5.63281e-63
67384	Bag4	1.82279	4.52144	286.403	3.02236e-64	7.38346e-63
18194	Nsdhl	1.60764	5.20365	286.166	3.40381e-64	8.30217e-63
22340	Vegfb	1.2703	5.70044	285.871	3.94665e-64	9.61099e-63
51798	Ech1	1.23469	6.87101	285.36	5.10131e-64	1.24033e-62
18417	Cldn11	6.99051	1.99909	285.122	5.74688e-64	1.39509e-62
108655	Foxp1	-1.19566	6.14857	284.716	7.04693e-64	1.70799e-62
13385	Dlg4	-1.38777	5.3347	283.611	1.22668e-63	2.9685e-62
21824	Thbd	1.88725	8.09904	283.593	1.23783e-63	2.99077e-62
76614	Immt	1.1753	7.5291	283.481	1.30955e-63	3.15911e-62
76306	Slc18b1	1.38832	5.53334	281.391	3.73663e-63	9.00002e-62
66148	Dnajc15	1.7743	4.56056	281.322	3.86808e-63	9.30209e-62
353170	Txlng	1.63026	5.11945	281.27	3.97019e-63	9.53278e-62
73750	Whrn	2.24291	3.80364	281.22	4.07117e-63	9.76005e-62
67880	Dcxr	1.71355	4.97157	281.098	4.32802e-63	1.03597e-61
227333	Dgkd	1.25863	6.66411	280.56	5.66872e-63	1.35478e-61
223917	Krt79	10.6876	1.62461	280.295	6.47466e-63	1.545e-61
70617	Fam241a	2.57635	3.45493	279.015	1.23121e-62	2.93341e-61
24063	Spry1	1.74722	4.80377	278.564	1.54337e-62	3.67145e-61
235435	Lctl	5.18934	2.17171	278.451	1.63368e-62	3.8803e-61
74051	Steap2	-1.66177	5.31819	277.776	2.29206e-62	5.43571e-61
80876	Ifitm2	-1.19758	7.86726	277.761	2.30928e-62	5.46814e-61
18655	Pgk1	-1.44616	9.09483	277.758	2.31292e-62	5.46836e-61
12832	Col5a2	-1.27887	11.0388	277.545	2.57388e-62	6.07602e-61
53318	Pdlim3	2.5794	3.47458	277.341	2.85142e-62	6.7209e-61
71724	Aox3	3.91426	2.62114	277.171	3.10579e-62	7.30927e-61
22379	Fmnl3	-1.28221	5.64714	276.975	3.42684e-62	8.05255e-61
107831	Adgrb1	4.5264	2.21211	276.646	4.04136e-62	9.4677e-61
12868	Cox8a	1.43336	7.54301	276.649	4.03572e-62	9.4677e-61
18858	Pmp22	-1.20594	8.50428	276.573	4.19211e-62	9.80598e-61
83397	Akap12	1.17479	7.09114	275.875	5.95056e-62	1.38982e-60
17388	Mmp15	2.18631	3.82334	275.346	7.76029e-62	1.80976e-60
20311	Cxcl5	-1.22238	7.03751	275.09	8.82105e-62	2.05403e-60
12861	Cox6a1	1.28642	8.09665	274.88	9.80211e-62	2.27903e-60
664994	Isoc2a	1.73217	5.47072	273.966	1.55081e-61	3.60027e-60
26877	B3galt1	2.77935	3.34309	273.916	1.5901e-61	3.68038e-60
13358	Slc25a1	1.29283	7.30671	273.918	1.58873e-61	3.68038e-60
333433	Gpd1l	1.5178	5.73804	273.732	1.74427e-61	4.03117e-60
94187	Zfp423	2.0556	4.53363	273.262	2.20749e-61	5.09408e-60
19272	Ptprk	-1.11874	6.26493	272.913	2.63041e-61	6.06095e-60
105785	Kdelr3	-1.5683	4.95946	272.655	2.99389e-61	6.88818e-60
76980	Ube2ql1	3.69303	2.86774	272.56	3.1411e-61	7.21611e-60
52538	Acaa2	1.30577	5.76909	272.152	3.85429e-61	8.84135e-60
12845	Comp	1.44093	10.4167	271.736	4.74775e-61	1.08747e-59
66462	Rex1bd	1.21018	6.04012	271.152	6.36595e-61	1.45595e-59
435965	Lrp3	1.64032	5.78435	271.133	6.42766e-61	1.46789e-59
17203	Mc5r	5.44101	1.99169	270.859	7.37354e-61	1.68141e-59
320782	Tmem154	-3.76509	3.30929	270.349	9.52585e-61	2.169e-59
26358	Aldh1a7	1.13637	7.55712	270.34	9.56651e-61	2.17504e-59
240057	Syngap1	-1.55298	4.99988	270.316	9.68166e-61	2.19798e-59
17873	Gadd45b	-1.72125	5.19911	269.909	1.188e-60	2.69308e-59
74777	Selenon	-1.07807	6.97225	269.755	1.28355e-60	2.90543e-59
22368	Trpv2	2.76814	3.10951	269.337	1.5827e-60	3.57731e-59
71690	Esm1	3.09802	3.17273	269.268	1.63877e-60	3.69862e-59
241624	Exd1	2.95249	2.89776	269.081	1.79928e-60	4.05495e-59
19679	Pitpnm2	1.3758	5.60808	269.056	1.8222e-60	4.10061e-59
268882	Fbxo45	1.40729	5.58221	268.012	3.07813e-60	6.91682e-59
109272	Mybpc1	2.18076	3.88843	267.764	3.48597e-60	7.82186e-59
67460	Decr1	1.15076	6.13058	267.42	4.14277e-60	9.28208e-59
21763	Tex2	1.34629	5.65898	267.01	5.08905e-60	1.13857e-58
22138	Ttn	1.7859	5.04301	266.907	5.35837e-60	1.19709e-58
66945	Sdha	1.15075	8.29389	266.527	6.48402e-60	1.44647e-58
15364	Hmga2	-2.02048	4.17181	266.524	6.49433e-60	1.44668e-58
67426	Coq8a	1.61883	5.56358	266.108	8.00207e-60	1.77997e-58
16543	Mdfic	-1.42554	5.64382	265.2	1.2619e-59	2.80291e-58
11520	Plin2	1.17228	6.90283	265.159	1.28818e-59	2.85717e-58
17193	Mbd4	1.54038	4.83836	264.989	1.40291e-59	3.10717e-58
23876	Fbln5	-1.41131	9.72073	264.914	1.45671e-59	3.22169e-58
15929	Idh3g	1.20459	7.03456	264.506	1.7875e-59	3.94762e-58
66841	Etfdh	1.22123	6.51933	263.99	2.31668e-59	5.10897e-58
66607	Ms4a4d	-3.44209	2.48691	262.747	4.32348e-59	9.52093e-58
170731	Mfn2	1.05849	7.24851	262.35	5.27563e-59	1.16011e-57
216198	Tcp11l2	-1.26899	5.73651	262.122	5.91665e-59	1.29922e-57
18578	Pde4b	-1.5858	5.04766	261.165	9.56038e-59	2.09635e-57
12268	C4b	-1.14219	10.2505	260.646	1.24106e-58	2.71747e-57
17305	Mfng	8.23636	1.47995	260.515	1.32503e-58	2.89721e-57
67454	Ikbip	-1.07024	6.44513	260.107	1.62659e-58	3.55154e-57
67299	Dock7	-1.15605	7.92475	259.84	1.85913e-58	4.05354e-57
245857	Ssh3	-1.52894	4.79187	259.083	2.71842e-58	5.9187e-57
18208	Ntn1	1.65754	5.47421	258.794	3.14386e-58	6.83534e-57
14051	Eya4	-2.10616	4.43405	258.753	3.20882e-58	6.96676e-57
56282	Mrpl12	1.78202	4.67388	258.744	3.22397e-58	6.9898e-57
236899	Pcyt1b	-2.53314	3.43101	258.245	4.14017e-58	8.96359e-57
11910	Atf3	3.94532	2.55955	256.953	7.91783e-58	1.71183e-56
16688	Krt6b	10.5335	1.48366	256.908	8.09981e-58	1.74872e-56
232371	C1rl	-1.74674	4.21924	256.677	9.09825e-58	1.96153e-56
22041	Trf	1.47304	6.45572	256.382	1.05494e-57	2.27121e-56
54409	Ramp2	2.46443	3.83705	256.204	1.15322e-57	2.47933e-56
67419	Armh4	-1.6909	4.92361	256.164	1.17681e-57	2.52653e-56
66108	Ndufa9	1.33597	6.446	256.057	1.24148e-57	2.66167e-56
11951	Atp5g1	1.14555	6.61976	255.999	1.27864e-57	2.73753e-56
18128	Notch1	1.08697	6.33057	255.97	1.29733e-57	2.7737e-56
54140	Avpr1a	-1.464	5.80607	255.429	1.70209e-57	3.63404e-56
14366	Fzd4	1.27352	6.28868	255.303	1.81295e-57	3.86537e-56
56794	Hacl1	1.55438	5.09167	255.165	1.94319e-57	4.13732e-56
268566	Gphn	1.43154	5.42527	254.952	2.1617e-57	4.59622e-56
20564	Slit3	1.08123	7.17376	254.826	2.3038e-57	4.8916e-56
27360	Add3	1.19177	6.14603	254.695	2.46048e-57	5.2171e-56
67749	Mgarp	-4.13076	2.40264	254.109	3.30119e-57	6.99008e-56
18003	Nedd9	-1.17147	6.5981	254.029	3.43593e-57	7.2654e-56
16007	Ccn1	-1.57306	8.52944	253.906	3.65451e-57	7.71702e-56
320790	Chd7	3.02419	2.72201	253.839	3.78005e-57	7.97121e-56
30878	Apln	-1.59577	4.54993	253.757	3.93819e-57	8.29333e-56
71566	Clmp	-1.13338	6.83552	253.505	4.46938e-57	9.39911e-56
54613	St3gal6	2.03485	5.586	253.37	4.78489e-57	1.00489e-55
19241	Tmsb4x	1.10731	9.48042	252.39	7.82432e-57	1.64098e-55
68385	Tlcd1	1.97511	4.02647	252.354	7.96485e-57	1.66818e-55
242466	Zfp462	-1.43142	5.44207	252.248	8.4009e-57	1.75712e-55
75406	Ndufs7	1.20053	6.29655	251.692	1.11081e-56	2.32021e-55
56722	Litaf	-1.15293	7.18039	251.682	1.11603e-56	2.32796e-55
11622	Ahr	-1.15459	8.11791	251.67	1.12299e-56	2.33931e-55
236900	Pdk3	-1.27941	5.48637	251.191	1.42846e-56	2.97163e-55
208777	Sned1	1.31043	10.9847	250.976	1.59111e-56	3.30553e-55
26938	St6galnac5	4.30392	2.81	250.929	1.62868e-56	3.37902e-55
11606	Agt	4.0323	5.43888	250.667	1.85762e-56	3.84882e-55
11307	Abcg1	4.36948	4.79461	250.286	2.24968e-56	4.65487e-55
68947	Chst8	3.45025	2.55531	250.038	2.54803e-56	5.26513e-55
14799	Gria1	3.11278	3.46979	249.68	3.0487e-56	6.29126e-55
12494	Cd38	-4.64167	2.08433	248.573	5.31655e-56	1.09565e-54
66152	Uqcr10	1.55016	6.05788	248.435	5.69716e-56	1.17252e-54
66495	Ndufb3	1.76673	5.01594	248.277	6.16743e-56	1.26761e-54
99138	Stard7	1.09687	6.49222	247.898	7.45881e-56	1.53099e-54
68303	Fam114a1	-1.09939	7.23545	246.865	1.25272e-55	2.5679e-54
72181	Nsun4	-1.45056	5.04081	246.764	1.31801e-55	2.69816e-54
14118	Fbn1	-1.24751	9.65806	245.554	2.41977e-55	4.94704e-54
66887	Lonp2	1.02788	7.40385	245.396	2.61873e-55	5.34672e-54
14119	Fbn2	-1.24425	8.73242	245.39	2.62667e-55	5.35583e-54
22724	Zbtb7b	1.10846	6.34815	245.285	2.76998e-55	5.64059e-54
73737	Bbln	1.52593	4.93769	245.113	3.01927e-55	6.14011e-54
66612	Ormdl3	1.31733	6.92724	244.905	3.35182e-55	6.80741e-54
13731	Emp2	-1.0866	6.90834	244.217	4.73522e-55	9.60439e-54
114584	Clic1	-1.01868	6.70881	244.133	4.93726e-55	1.0001e-53
70638	Fam189a1	4.23748	2.40314	243.982	5.3258e-55	1.07739e-53
252838	Tox	-2.62482	3.67458	243.759	5.95869e-55	1.20384e-53
217517	Stxbp6	1.42989	5.12794	243.476	6.8666e-55	1.38545e-53
75691	Anks6	1.65808	4.62046	243.258	7.66198e-55	1.54391e-53
22793	Zyx	-1.36706	8.53539	243.155	8.06926e-55	1.62386e-53
23828	Bves	4.19471	2.23432	243	8.7208e-55	1.75269e-53
72033	Tsc22d2	-1.0955	6.60802	242.906	9.14166e-55	1.83488e-53
229949	Ak5	-1.49232	6.02694	242.878	9.27327e-55	1.85888e-53
66330	1700020L24Rik	3.17162	2.67506	242.232	1.28254e-54	2.56758e-53
68682	Slc44a2	-1.43748	7.97287	242.075	1.38766e-54	2.77441e-53
381338	Lonrf2	2.76596	3.13186	242.041	1.41124e-54	2.81792e-53
12859	Cox5b	1.50251	6.45452	241.871	1.53752e-54	3.0661e-53
13730	Emp1	-1.15186	8.19668	241.86	1.54582e-54	3.07865e-53
66525	Timm50	1.25635	5.57952	241.727	1.65219e-54	3.28627e-53
13809	Enpep	2.53752	3.46007	241.494	1.85769e-54	3.69024e-53
226791	Lyplal1	1.77898	4.1111	241.282	2.06606e-54	4.09887e-53
12443	Ccnd1	1.2596	7.43409	241.133	2.22678e-54	4.41207e-53
216161	Sbno2	-1.07282	7.0066	241.003	2.37747e-54	4.70459e-53
72780	Rspo3	1.75856	4.10118	240.598	2.91308e-54	5.75707e-53
54635	Pdgfc	-1.41161	5.35853	240.535	3.00608e-54	5.93326e-53
11946	Atp5a1	1.13671	9.57867	240.512	3.04204e-54	5.99656e-53
11898	Ass1	1.86792	4.49798	240.118	3.70727e-54	7.29854e-53
12182	Bst1	-4.90612	2.06709	239.905	4.12451e-54	8.10961e-53
18597	Pdha1	1.03526	7.72727	239.805	4.33775e-54	8.51802e-53
72309	Tmem158	2.28268	3.85043	239.648	4.69212e-54	9.20217e-53
12499	Entpd5	1.19003	5.86733	239.536	4.96553e-54	9.726e-53
15040	H2-T23	-1.32978	5.2585	239.325	5.51973e-54	1.07978e-52
29817	Igfbp7	1.24948	8.81455	239.255	5.71637e-54	1.11683e-52
18951	Septin5	-1.22131	5.65687	239.074	6.26069e-54	1.22163e-52
15982	Ifrd1	1.17285	5.71628	238.874	6.92139e-54	1.34884e-52
12040	Bckdhb	1.87661	4.92907	238.496	8.36938e-54	1.62896e-52
24066	Spry4	2.50569	3.31682	238.258	9.4301e-54	1.8331e-52
18631	Pex11a	1.893	4.18393	237.7	1.2479e-53	2.42271e-52
14594	Ggta1	-1.29113	6.36623	237.627	1.29459e-53	2.51021e-52
20603	Sms	1.52886	5.1789	237.276	1.54407e-53	2.99018e-52
67811	Poldip2	1.03273	6.70947	237.093	1.6929e-53	3.27428e-52
17929	Myom1	1.94656	3.86144	236.465	2.32051e-53	4.48254e-52
55951	Mpc1	1.68946	5.01047	236.253	2.58126e-53	4.98e-52
56264	Cpxm1	-1.68119	4.90367	235.691	3.42189e-53	6.59356e-52
76498	Paqr4	1.7562	4.55511	235.634	3.52185e-53	6.77769e-52
242653	Cldn19	-3.48314	3.91702	235.562	3.65052e-53	7.01656e-52
51902	Rnf24	1.40737	5.15314	235.515	3.73881e-53	7.1773e-52
16560	Kif1a	1.63578	4.47813	234.972	4.91011e-53	9.41409e-52
56752	Aldh9a1	1.20612	5.98113	234.941	4.98806e-53	9.55168e-52
74754	Dhcr24	1.13198	5.77467	234.878	5.14852e-53	9.8467e-52
208647	Creb3l2	-1.09213	7.24915	234.404	6.52906e-53	1.24716e-51
245638	Tbc1d8b	-1.28004	5.32299	234.219	7.16579e-53	1.36709e-51
15528	Hspe1	1.07406	6.8713	234.16	7.37989e-53	1.40619e-51
70673	Prdm16	1.24967	5.5618	233.779	8.93583e-53	1.70057e-51
58223	Mmp19	-1.22536	5.41296	233.639	9.58785e-53	1.8224e-51
208715	Hmgcs1	1.20356	7.09815	233.54	1.00797e-52	1.91353e-51
57423	Atp5j2	1.24513	7.01283	233.237	1.17356e-52	2.22514e-51
56428	Mtch2	1.02121	7.21787	233.091	1.26271e-52	2.39123e-51
70292	Afap1	1.02343	6.98599	232.789	1.46944e-52	2.77931e-51
17711	CYTB	1.27072	12.2153	232.555	1.65232e-52	3.12139e-51
12807	Hps3	1.2949	5.65206	232.17	2.00474e-52	3.7825e-51
11815	Apod	-1.52243	7.88407	231.318	3.07503e-52	5.79481e-51
12017	Bag1	1.14498	7.27785	230.934	3.72979e-52	7.02011e-51
11835	Ar	1.20821	5.55715	230.892	3.80885e-52	7.16016e-51
76441	Daam2	1.19513	6.32	230.658	4.28431e-52	8.04416e-51
27425	Atp5l	1.12396	6.39129	230.172	5.46674e-52	1.02518e-50
110842	Etfa	1.17341	6.97951	228.688	1.15179e-51	2.15733e-50
54447	Asah2	-1.31192	5.06846	228.47	1.2851e-51	2.40411e-50
63959	Slc29a1	-1.28626	5.35237	228.302	1.39823e-51	2.61257e-50
18604	Pdk2	1.24895	5.93031	228.264	1.42573e-51	2.66073e-50
13030	Ctsb	1.13933	10.0407	227.895	1.71586e-51	3.19831e-50
16005	Igfals	4.23658	4.1141	227.546	2.04378e-51	3.80493e-50
170441	Slc2a10	-2.20377	3.63826	227.404	2.19576e-51	4.08295e-50
320404	Itpkb	-1.03224	6.43681	227.042	2.63362e-51	4.89123e-50
13512	Dsg3	7.4803	1.51343	226.875	2.86274e-51	5.31037e-50
53901	Rcan2	-1.6067	4.95041	226.866	2.87689e-51	5.3302e-50
72416	Lrpprc	1.16023	6.34879	226.27	3.88039e-51	7.18081e-50
24052	Sgcd	1.43313	4.88623	225.923	4.61792e-51	8.53541e-50
225288	Fhod3	3.11022	2.89643	225.772	4.98147e-51	9.19632e-50
17719	ND4	1.33801	11.1702	225.378	6.07127e-51	1.11948e-49
70574	Cpm	4.12873	2.44749	225.264	6.43012e-51	1.18423e-49
12227	Btg2	1.30895	5.52416	225.251	6.4736e-51	1.19082e-49
60440	Iigp1	1.46821	5.10193	225.168	6.74639e-51	1.23952e-49
16668	Krt18	3.19921	2.74678	224.168	1.11524e-50	2.04659e-49
108100	Baiap2	1.02741	6.23512	223.776	1.35784e-50	2.48884e-49
12858	Cox5a	1.37139	5.72472	223.641	1.45275e-50	2.65963e-49
22259	Nr1h3	2.29718	4.03804	223.172	1.83873e-50	3.36228e-49
18787	Serpine1	-3.59231	8.05994	223.045	1.95962e-50	3.57909e-49
50530	Mfap5	-1.38261	5.50041	222.709	2.31986e-50	4.23204e-49
18121	Nog	2.61405	3.01721	222.696	2.33573e-50	4.25594e-49
212943	Tent5a	1.42531	6.0121	222.634	2.40919e-50	4.38462e-49
67247	Mtarc2	1.08542	6.58093	222.093	3.16058e-50	5.74531e-49
67266	Dipk1a	-1.40746	4.80023	222.077	3.18685e-50	5.78625e-49
108888	Atad3a	1.22301	5.78304	221.893	3.49447e-50	6.33733e-49
213056	Fam126b	1.43684	5.27191	221.821	3.62391e-50	6.56434e-49
12575	Cdkn1a	1.1459	6.20706	221.247	4.83605e-50	8.74973e-49
13641	Efnb1	-0.991153	7.03869	221.199	4.95202e-50	8.94906e-49
105242407	Gm38684	1.38306	5.4456	220.847	5.90999e-50	1.06677e-48
21678	Tead3	-1.19267	5.6931	220.704	6.35095e-50	1.14503e-48
11669	Aldh2	1.23586	7.84793	220.489	7.07543e-50	1.27416e-48
70186	Fam162a	-1.12134	6.62398	220.473	7.13274e-50	1.28298e-48
59091	Jph2	1.61463	4.47935	220.294	7.80147e-50	1.40163e-48
280408	Rilp	2.56491	3.2113	219.902	9.49919e-50	1.70466e-48
320916	Wscd2	1.73804	4.55566	219.852	9.74023e-50	1.74588e-48
83945	Dnaja3	1.05584	5.95663	219.713	1.04488e-49	1.87072e-48
237175	Adgrg2	-1.45412	5.4538	219.61	1.09993e-49	1.96698e-48
20620	Plk2	-1.43223	7.65831	219.3	1.28531e-49	2.29583e-48
240913	Adamts4	-1.33854	4.91013	218.869	1.59612e-49	2.8477e-48
11857	Arhgdib	-1.20207	5.34245	218.364	2.0568e-49	3.66538e-48
59010	Sqor	1.51126	4.48867	218.237	2.19256e-49	3.9028e-48
108052	Slc14a1	-5.76686	1.98532	218.226	2.20481e-49	3.92009e-48
69697	Camsap3	3.8656	2.58039	218.209	2.22364e-49	3.949e-48
68259	Ift80	-1.17547	5.59473	218.005	2.46329e-49	4.36957e-48
18550	Furin	-1.00097	7.27523	217.949	2.53353e-49	4.48901e-48
76612	Lrrc27	2.40985	3.34533	217.873	2.6322e-49	4.65848e-48
67003	Uqcrc2	1.18227	7.44324	217.64	2.95846e-49	5.22989e-48
56738	Mocs1	1.11685	5.80169	217.495	3.18212e-49	5.61882e-48
69847	Wnk4	1.44412	5.10925	217.252	3.59569e-49	6.34183e-48
244867	Arhgap20	1.28051	5.08448	216.621	4.93645e-49	8.69662e-48
19159	Cyth3	-0.998361	6.43669	216.47	5.326e-49	9.37218e-48
16504	Kcnc3	3.68336	2.31899	216.228	6.01296e-49	1.0569e-47
94227	Pi15	-1.38217	7.66378	215.604	8.22744e-49	1.44449e-47
53422	Ybx2	5.03047	1.82981	215.485	8.73379e-49	1.53164e-47
378937	Lrrc24	1.37526	4.80658	215.426	8.99826e-49	1.57623e-47
17713	Grpel1	1.12849	5.60705	214.73	1.27624e-48	2.23306e-47
11745	Anxa3	-1.30182	6.36669	214.586	1.37239e-48	2.39857e-47
72281	Sh2d4a	3.20432	3.03472	214.094	1.75685e-48	3.06703e-47
52064	Coq5	1.48811	4.81872	214.06	1.78676e-48	3.11572e-47
18552	Pcsk5	-1.7182	6.61789	213.715	2.1255e-48	3.70222e-47
235169	Foxred1	1.29218	5.17957	213.415	2.47094e-48	4.29904e-47
17721	ND5	1.28704	11.7371	213.105	2.88715e-48	5.01752e-47
595136	Ndufs5	1.10003	5.63399	213.01	3.02773e-48	5.25591e-47
21973	Top2a	-1.06365	6.52809	213.005	3.03616e-48	5.26461e-47
64074	Smoc2	-1.88101	9.36188	212.229	4.48381e-48	7.76606e-47
329154	Ankrd44	1.17686	6.26874	212.224	4.4947e-48	7.77619e-47
74551	Pck2	-1.30151	5.03535	211.956	5.14151e-48	8.88525e-47
18293	Ogdh	0.965686	7.93238	211.844	5.43822e-48	9.38747e-47
110095	Pygl	-1.13565	6.02806	211.341	7.00408e-48	1.20769e-46
18822	Plod1	-1.05891	7.3628	211.296	7.16403e-48	1.23389e-46
380928	Lmo7	1.1379	7.56868	210.509	1.06348e-47	1.82963e-46
57814	Kcne4	-2.31651	4.74958	210.292	1.18649e-47	2.03899e-46
72108	Ddhd2	0.981297	6.50781	210.164	1.26508e-47	2.17162e-46
14871	Gstt1	1.33413	5.19764	209.998	1.37495e-47	2.35761e-46
108089	Rnf144a	0.983909	6.70579	209.735	1.56885e-47	2.6871e-46
73569	Vgll3	-1.04243	7.90808	209.684	1.60987e-47	2.7543e-46
67442	Retsat	1.5584	4.64686	209.615	1.66669e-47	2.84834e-46
99899	Ifi44	-3.69804	2.64829	208.926	2.35577e-47	4.0215e-46
15360	Hmgcs2	2.00322	3.79852	208.742	2.5837e-47	4.40572e-46
17390	Mmp2	-1.05244	9.13351	208.672	2.6769e-47	4.55961e-46
76686	Clip3	-0.962318	6.64473	208.641	2.71863e-47	4.62558e-46
320910	Itgb8	-1.66288	4.67946	208.47	2.96318e-47	5.03611e-46
14314	Fstl1	-1.05345	10.9519	208.433	3.01881e-47	5.125e-46
66075	Chchd3	1.03984	5.90872	208.006	3.7398e-47	6.34203e-46
101122	Rpusd3	2.07689	3.47385	207.945	3.85721e-47	6.53394e-46
12864	Cox6c	1.13691	7.65124	207.781	4.18856e-47	7.08745e-46
21827	Thbs3	-1.50231	4.52168	207.537	4.73506e-47	8.00339e-46
17345	Mki67	-1.4359	6.19351	207.331	5.2499e-47	8.86388e-46
64661	Krtdap	8.03643	1.44586	207.25	5.46798e-47	9.22198e-46
14284	Fosl2	-1.08752	7.63574	207.141	5.77659e-47	9.73182e-46
67305	Gpx7	-1.26993	5.07847	206.968	6.2998e-47	1.06017e-45
84094	Plvap	2.80328	3.16372	206.948	6.36314e-47	1.06966e-45
246154	Vasn	-0.972854	7.75495	206.877	6.59559e-47	1.10753e-45
17996	Neb	1.40484	5.12471	206.822	6.78133e-47	1.13748e-45
83964	Jam3	-1.19862	5.28277	206.658	7.36261e-47	1.23364e-45
102644	Oaf	-1.39123	5.85741	206.27	8.94587e-47	1.49729e-45
13806	Eno1	-1.16031	10.9702	206.044	1.00209e-46	1.6754e-45
13405	Dmd	1.84249	3.96776	205.871	1.09305e-46	1.8255e-45
17708	COX1	1.22939	13.6585	205.786	1.141e-46	1.90352e-45
68671	Pcyt2	1.14589	5.6754	205.608	1.24784e-46	2.07951e-45
15505	Hsph1	-0.946172	7.59759	205.491	1.32354e-46	2.20328e-45
14221	Fjx1	2.21689	3.56253	205.277	1.47349e-46	2.45025e-45
50490	Nox4	-2.29128	4.07287	205.094	1.61572e-46	2.68387e-45
213556	Plekhh2	-1.13178	6.76588	204.681	1.98832e-46	3.29924e-45
17068	Ly6d	10.2375	1.18673	204.537	2.13706e-46	3.54224e-45
18746	Pkm	-1.10045	10.1531	204.519	2.15594e-46	3.56969e-45
16848	Lfng	1.97689	3.58713	204.423	2.26298e-46	3.7429e-45
72900	Ndufv2	1.04749	6.48945	204.376	2.3176e-46	3.82913e-45
110196	Fdps	1.17812	6.12067	204.355	2.34196e-46	3.86524e-45
21813	Tgfbr2	-0.983925	8.80158	204.14	2.6086e-46	4.3007e-45
74080	Nmnat3	1.96899	3.44655	204.134	2.6166e-46	4.30928e-45
59014	Rrs1	1.14422	5.38929	203.966	2.84642e-46	4.67777e-45
12034	Phb2	0.969061	6.76857	203.968	2.84419e-46	4.67777e-45
76561	Snx7	-1.22344	5.34356	203.955	2.86347e-46	4.70079e-45
11757	Prdx3	1.05619	6.6225	203.249	4.08236e-46	6.69463e-45
226856	Lpgat1	1.10345	7.63819	202.991	4.64576e-46	7.61045e-45
16477	Junb	-1.35474	5.42565	202.989	4.65106e-46	7.61105e-45
20525	Slc2a1	-1.21728	6.86639	202.794	5.12914e-46	8.38449e-45
192678	Rassf3	1.4047	4.562	202.595	5.66985e-46	9.25854e-45
14660	Gls	-1.07542	8.18133	202.392	6.27925e-46	1.02428e-44
56448	Cyp2d22	-3.01108	3.19121	202.067	7.39353e-46	1.20477e-44
231997	Fkbp14	-1.14941	5.63287	201.789	8.50013e-46	1.38363e-44
50799	Slc25a13	-1.75548	3.84059	201.693	8.91974e-46	1.4504e-44
55983	Pdzrn3	-0.908384	7.09609	201.555	9.56295e-46	1.55335e-44
78896	Ecrg4	1.18398	9.36425	201.145	1.17499e-45	1.90658e-44
22403	Ccn5	-0.980114	8.76248	201.138	1.17921e-45	1.91141e-44
233079	Ffar2	5.77083	1.86277	201.104	1.1992e-45	1.94176e-44
329252	Lgr6	2.25815	3.39248	200.586	1.55566e-45	2.51632e-44
18553	Pcsk6	-0.939576	6.57535	200.399	1.70927e-45	2.76189e-44
108154	Adamts6	-1.92417	5.21122	200.05	2.03702e-45	3.28803e-44
15951	Ifi204	-2.34843	3.22409	199.784	2.32804e-45	3.75384e-44
19876	Robo1	-1.41441	4.98087	199.703	2.42495e-45	3.90602e-44
70370	Fbln7	3.00461	4.69603	198.839	3.7419e-45	6.02102e-44
12372	Casq1	1.90204	4.3802	198.822	3.77553e-45	6.0688e-44
224829	Trerf1	-1.80648	3.77657	198.714	3.98611e-45	6.40062e-44
110391	Qdpr	1.07614	5.87506	198.571	4.28187e-45	6.86836e-44
219134	Shisa2	2.14543	3.66523	198.451	4.54958e-45	7.29021e-44
16518	Kcnj2	-2.11861	3.33308	198.088	5.45956e-45	8.73926e-44
75723	Amotl1	1.03206	8.30306	197.981	5.76067e-45	9.21169e-44
13800	Enah	-0.952935	6.94238	197.737	6.51017e-45	1.03994e-43
12831	Col5a1	-0.947378	8.73578	197.246	8.3318e-45	1.32955e-43
16582	Kifc3	-1.53079	5.10076	197.09	9.01249e-45	1.43669e-43
68197	Ndufc2	1.26001	5.47995	197.039	9.24851e-45	1.47279e-43
22591	Xpc	1.10008	5.44115	196.657	1.12045e-44	1.78243e-43
54381	Cpq	-0.986697	6.45917	196.26	1.36754e-44	2.17326e-43
15937	Ier3	-1.95044	4.85321	196.239	1.38219e-44	2.19429e-43
14860	Gsta4	2.54058	2.75526	195.977	1.57713e-44	2.50118e-43
67905	Ppm1m	1.13107	5.38832	195.938	1.60816e-44	2.54777e-43
68015	Trap1	0.922525	6.83347	195.389	2.11875e-44	3.35323e-43
194590	Reps2	3.13146	2.94815	195.37	2.13929e-44	3.38228e-43
14872	Gstt2	3.67532	4.18614	195.348	2.16311e-44	3.41642e-43
226041	Pgm5	1.84318	3.94689	194.995	2.58324e-44	4.0758e-43
11949	Atp5c1	0.964798	7.6591	194.829	2.80725e-44	4.42472e-43
72709	C1qtnf6	-1.25803	5.45811	194.782	2.87484e-44	4.52663e-43
67826	Snap47	-1.00293	6.21905	194.77	2.89235e-44	4.54954e-43
74365	Lonrf3	3.31316	3.0295	194.672	3.03822e-44	4.77412e-43
19223	Ptgis	-1.0637	6.95311	194.572	3.19525e-44	5.01576e-43
230073	Ddx58	-1.14141	6.05138	194.544	3.23976e-44	5.08046e-43
18186	Nrp1	0.957699	8.45751	194.271	3.71696e-44	5.82286e-43
66046	Ndufb5	1.07932	5.75607	194.235	3.78449e-44	5.92263e-43
20910	Stxbp1	-1.26184	5.27935	194.231	3.79258e-44	5.92927e-43
77113	Klhl2	1.42214	4.6962	194.067	4.11823e-44	6.43187e-43
11826	Aqp1	2.2566	7.32352	193.952	4.3624e-44	6.80631e-43
66894	Wwp2	-1.27971	8.31974	193.884	4.51309e-44	7.0343e-43
72585	Lypd1	4.05176	3.20577	193.868	4.54994e-44	7.08458e-43
12825	Col3a1	-1.05945	12.1462	193.851	4.59071e-44	7.14085e-43
54353	Skap2	-1.062	5.97643	193.75	4.82868e-44	7.50344e-43
22235	Ugdh	-0.88973	7.18085	193.71	4.92585e-44	7.64673e-43
14697	Gnb5	1.33933	4.87702	193.673	5.01899e-44	7.78348e-43
13120	Cyp4b1	2.61323	3.02133	193.664	5.04162e-44	7.81071e-43
231086	Hadhb	1.05909	7.08777	193.614	5.17011e-44	8.00174e-43
66120	Fkbp11	-2.01307	3.76494	193.485	5.51737e-44	8.53061e-43
66775	Hacd4	-1.20964	5.09589	193.032	6.92712e-44	1.06995e-42
68337	Crip2	0.91422	7.15807	192.753	7.96946e-44	1.22972e-42
17754	Map1a	-0.996594	6.04782	192.563	8.76967e-44	1.35184e-42
14586	Gfra2	1.14399	6.26223	192.356	9.73101e-44	1.49854e-42
16691	Krt8	3.87809	3.19725	192.232	1.03534e-43	1.5928e-42
216961	Coro6	2.99123	3.04807	192.084	1.11558e-43	1.71452e-42
68178	Cgnl1	0.9387	6.7416	192.033	1.14458e-43	1.75734e-42
70892	Ttll7	-2.59868	2.90717	192.024	1.14987e-43	1.76371e-42
56451	Suclg1	1.01556	6.49736	191.82	1.27389e-43	1.952e-42
15354	Hmgb3	1.73369	4.15667	191.504	1.49283e-43	2.2852e-42
18624	Pepd	1.18647	5.80219	191.413	1.56302e-43	2.39027e-42
68151	Wls	-0.969941	8.18274	191.299	1.65532e-43	2.52892e-42
11832	Aqp7	6.89143	3.89373	191.242	1.70289e-43	2.59901e-42
109672	Cyb5a	0.942178	7.12061	190.952	1.97044e-43	3.00438e-42
68041	Mid1ip1	1.60974	4.36822	190.944	1.97827e-43	3.01334e-42
12491	Cd36	8.53446	8.19167	190.844	2.0799e-43	3.1619e-42
12321	Calu	-0.966724	9.48652	190.844	2.07984e-43	3.1619e-42
57444	Isg20	-2.41057	2.8453	190.563	2.39544e-43	3.638e-42
22021	Tpst1	-1.1505	5.61854	190.505	2.46616e-43	3.74172e-42
22004	Tpm2	0.989932	8.2944	190.338	2.68325e-43	4.06709e-42
225207	Zfp521	-0.987296	7.66403	190.106	3.01463e-43	4.56488e-42
68066	Slc25a39	0.99654	7.00388	190.027	3.13714e-43	4.74574e-42
57810	Cdon	-0.923517	8.03324	189.977	3.2159e-43	4.86011e-42
19049	Ppp1r1b	1.80225	4.28319	189.863	3.40612e-43	5.14255e-42
68603	Pmvk	1.60363	4.12335	189.811	3.49547e-43	5.27228e-42
238330	Irf2bpl	-1.04894	5.69597	188.983	5.30125e-43	7.98815e-42
80911	Acox3	1.03296	5.75007	188.81	5.78223e-43	8.7044e-42
110323	Cox6b1	1.42408	7.32191	188.374	7.19909e-43	1.08267e-41
50523	Lats2	-0.924768	6.95914	188.298	7.48008e-43	1.12383e-41
13732	Emp3	-1.18591	6.10828	188.086	8.32116e-43	1.24898e-41
100040724	Mirg	-2.02567	3.51388	188.037	8.52616e-43	1.27851e-41
171167	Fut10	-1.60737	4.30217	187.661	1.03029e-42	1.54344e-41
20724	Serpinb5	10.0185	0.969875	187.6	1.06222e-42	1.58972e-41
382034	Gse1	1.44224	4.96298	187.511	1.1106e-42	1.66051e-41
96979	Ptges2	1.40189	4.98487	187.294	1.2388e-42	1.8504e-41
319942	A530016L24Rik	6.64617	5.80001	187.017	1.42401e-42	2.12498e-41
69581	Rhou	0.910859	7.23889	186.826	1.56745e-42	2.33677e-41
80287	Apobec3	-1.36208	4.67343	186.737	1.63933e-42	2.44157e-41
14792	Lpcat3	1.17948	6.33852	186.395	1.94677e-42	2.89666e-41
268515	Bahcc1	0.950201	6.72703	186.121	2.23433e-42	3.32134e-41
16174	Il18rap	-4.72726	2.15578	185.999	2.3758e-42	3.52823e-41
246293	Klhl8	1.57875	4.05075	185.917	2.47504e-42	3.67206e-41
237860	Ssh2	1.08931	5.88314	185.846	2.5645e-42	3.80113e-41
11472	Actn2	2.02746	4.12731	185.739	2.7066e-42	4.0079e-41
69553	Ripor3	-1.86326	3.99236	185.671	2.80065e-42	4.14319e-41
244723	Olfm2	5.89654	3.41297	185.366	3.265e-42	4.8255e-41
433456	4631405J19Rik	4.32321	2.30983	185.147	3.64466e-42	5.38145e-41
14183	Fgfr2	0.99275	8.93785	185.022	3.88149e-42	5.72567e-41
17001	Ltc4s	5.4969	1.47227	184.676	4.61983e-42	6.80829e-41
85308	Emc9	1.49877	4.26287	184.056	6.30796e-42	9.28722e-41
270192	Rab6b	1.4498	4.74153	183.51	8.30081e-42	1.22096e-40
98396	Slc41a1	-1.14748	6.15374	183.407	8.74263e-42	1.28473e-40
75735	Pank1	1.95481	3.79041	183.351	8.9918e-42	1.32008e-40
14677	Gnai1	1.64452	4.8941	183.163	9.88298e-42	1.44953e-40
54216	Pcdh7	1.77504	5.23774	183.144	9.97585e-42	1.46177e-40
20482	Skil	-1.65663	4.2718	183.135	1.00226e-41	1.46722e-40
56741	Igdcc4	-1.09622	5.53626	183.104	1.01816e-41	1.48909e-40
217684	Susd6	-1.02057	7.24094	182.976	1.08585e-41	1.58658e-40
214791	Sertad4	-0.997159	5.96922	182.917	1.11817e-41	1.63225e-40
67530	Uqcrb	1.13849	5.57342	182.569	1.3323e-41	1.94299e-40
11770	Fabp4	8.21144	10.3209	182.341	1.49386e-41	2.17654e-40
66180	P3h4	-0.909916	6.96959	182.337	1.49665e-41	2.17855e-40
71960	Myh14	2.78292	3.03086	182.255	1.5602e-41	2.26891e-40
72148	Tdrp	2.42623	2.73944	182.166	1.63141e-41	2.37024e-40
20585	Hltf	0.988644	6.04145	182.11	1.6775e-41	2.4349e-40
12554	Cdh13	1.45343	5.26424	181.526	2.25002e-41	3.26285e-40
71819	Kif23	-1.87561	3.68497	181.215	2.63136e-41	3.81226e-40
66725	Lrrk2	-1.25266	5.15035	180.981	2.96024e-41	4.28471e-40
23965	Tenm3	0.902567	6.2928	180.937	3.02517e-41	4.37458e-40
260315	Nav3	2.11234	3.34995	180.842	3.17307e-41	4.58415e-40
242721	Klhdc7a	3.17517	2.26308	180.408	3.94835e-41	5.69886e-40
474332	Dnm3os	-1.00167	7.0249	180.298	4.17144e-41	6.01522e-40
69608	Sec24d	-0.948685	6.93039	179.931	5.01704e-41	7.22783e-40
74645	Tent5c	1.8121	4.19534	179.7	5.63679e-41	8.11308e-40
19261	Sirpa	-1.11216	5.35526	179.674	5.71092e-41	8.21211e-40
68653	Samm50	1.05174	6.41492	179.463	6.3476e-41	9.11913e-40
230075	Ndufb6	1.34867	4.8122	179.348	6.72527e-41	9.6527e-40
11482	Acvrl1	-1.05628	5.63546	179.331	6.78345e-41	9.72715e-40
11496	Adam22	2.64139	2.68158	179.328	6.79332e-41	9.73225e-40
18111	Nnat	2.29974	3.35473	179.32	6.82202e-41	9.7643e-40
12534	Cdk1	-1.42644	4.66234	179.093	7.64789e-41	1.09362e-39
217124	Ppp1r9b	0.938435	7.85739	178.935	8.28e-41	1.18291e-39
66958	Tmx2	1.01774	5.61819	178.51	1.02497e-40	1.46295e-39
210293	Dock10	3.03532	2.70957	178.242	1.17285e-40	1.67248e-39
18053	Ngfr	3.12734	2.73206	178.14	1.23451e-40	1.75878e-39
16468	Jarid2	1.59896	5.39496	178.066	1.28119e-40	1.8236e-39
13601	Ecm1	-0.905839	8.2401	177.998	1.32571e-40	1.88522e-39
71721	Fam13c	-0.943881	6.74199	177.689	1.54854e-40	2.20007e-39
72948	Tppp	4.67685	1.4396	176.941	2.25644e-40	3.20285e-39
223254	Farp1	-0.98605	7.49358	176.572	2.71566e-40	3.85115e-39
70546	Zdhhc2	1.81037	3.88151	176.092	3.45822e-40	4.89968e-39
21810	Tgfbi	-1.8059	3.86895	175.7	4.21018e-40	5.95959e-39
13171	Dbt	1.23255	5.94005	175.663	4.29018e-40	6.06727e-39
245381	Sowahd	6.33063	1.39081	175.499	4.65877e-40	6.58249e-39
238564	Mylk4	3.74334	2.56976	175.292	5.16894e-40	7.29663e-39
193813	Mcfd2	-0.890349	6.57065	175.257	5.26034e-40	7.41886e-39
11464	Actc1	1.66311	5.65285	175.106	5.67503e-40	7.9964e-39
333088	Kcp	-1.83572	3.61778	175.068	5.78436e-40	8.14301e-39
20725	Serpinb8	2.02582	3.54283	174.874	6.37931e-40	8.97236e-39
13824	Epb41l4a	-1.4612	4.10925	174.76	6.75641e-40	9.49408e-39
66414	Ndufa12	1.21643	5.38474	174.553	7.49627e-40	1.05241e-38
71743	Coasy	1.15913	5.47928	174.522	7.61174e-40	1.06765e-38
14004	Chchd2	1.05279	8.1627	174.21	8.90658e-40	1.24814e-38
26879	B3galnt1	-1.32154	5.16722	174.207	8.92063e-40	1.24897e-38
56454	Aldh18a1	-0.950023	5.95777	174.185	9.01852e-40	1.26153e-38
240660	Slc35g1	2.83722	2.5376	174.073	9.54173e-40	1.33351e-38
16001	Igf1r	-0.909819	6.7134	173.908	1.03651e-39	1.44726e-38
217258	Abca8a	3.41026	1.90516	173.762	1.11562e-39	1.55632e-38
70209	Tmem143	1.24945	5.29509	173.211	1.47216e-39	2.05184e-38
21943	Tnfsf11	-2.94483	3.11143	173.136	1.52883e-39	2.12891e-38
72244	1600014C10Rik	1.30533	5.49312	172.891	1.72864e-39	2.40497e-38
234214	Sorbs2	-1.0685	7.68988	172.789	1.82028e-39	2.53017e-38
320046	F730043M19Rik	-2.00952	4.11465	172.551	2.05109e-39	2.84842e-38
12869	Cox8b	4.51959	2.1001	172.075	2.6056e-39	3.61523e-38
76267	Fads1	0.889953	7.48855	171.97	2.7477e-39	3.80898e-38
13617	Ednra	2.40699	4.10505	171.503	3.47432e-39	4.81192e-38
23892	Grem1	1.39328	5.31847	171.203	4.04051e-39	5.59107e-38
17722	ND6	1.28589	9.53462	171.043	4.37876e-39	6.05368e-38
18530	Pcdh8	4.91893	1.46931	170.94	4.61086e-39	6.36886e-38
73166	Tm7sf2	1.69024	3.88028	170.9	4.70475e-39	6.49273e-38
19672	Rcn1	-0.859843	7.40044	170.849	4.82701e-39	6.65549e-38
225608	Sh3tc2	-3.245	2.8081	170.768	5.02941e-39	6.92836e-38
18616	Peg3	1.12345	5.28948	170.71	5.17803e-39	7.12672e-38
16402	Itga5	-1.00906	6.50624	170.547	5.61823e-39	7.72569e-38
18196	Nsg1	-1.11121	5.76779	170.514	5.71486e-39	7.85156e-38
22634	Plagl1	0.918514	6.22466	170.31	6.33059e-39	8.68976e-38
101488	Slco2b1	6.88005	0.979883	170.109	7.00403e-39	9.60562e-38
634650	Gbp11	6.73546	1.38131	170.088	7.07764e-39	9.69794e-38
106369	Ypel1	1.18043	4.89041	170.041	7.24747e-39	9.92182e-38
79464	Lias	1.21605	5.13329	169.789	8.22855e-39	1.12549e-37
14661	Glud1	0.892637	8.23209	169.736	8.45104e-39	1.1549e-37
107522	Ece2	-1.32374	4.64942	169.332	1.03541e-38	1.41372e-37
20660	Sorl1	1.39568	5.18472	169.204	1.10432e-38	1.50647e-37
338523	Kdm7a	0.888632	6.41452	168.966	1.2445e-38	1.69619e-37
16551	Kif11	-1.41952	4.37903	168.859	1.31367e-38	1.78889e-37
13805	Eng	-1.12004	5.15075	168.824	1.33691e-38	1.81892e-37
14733	Gpc1	1.10604	6.71248	168.702	1.42123e-38	1.93194e-37
70435	Inf2	-1.28855	5.66758	168.519	1.55818e-38	2.11624e-37
18127	Nos3	5.83133	1.04297	168.474	1.59405e-38	2.16305e-37
20350	Sema3f	-0.950518	6.91847	168.321	1.72146e-38	2.33389e-37
56532	Ripk3	-1.4514	4.24081	168.311	1.73024e-38	2.34372e-37
50782	Rgs11	-2.11203	3.31016	167.884	2.14418e-38	2.90189e-37
78070	Cpt1c	-0.999012	5.75832	167.754	2.28891e-38	3.09505e-37
13008	Csrp2	-1.27792	5.18954	167.208	3.01366e-38	4.07148e-37
13866	Erbb2	-1.04211	5.57218	167.081	3.2121e-38	4.33577e-37
23948	Mmp17	2.51195	3.03355	167.06	3.2452e-38	4.37662e-37
77940	A930004D18Rik	-1.87205	3.70892	166.788	3.72251e-38	5.01595e-37
51800	Bok	1.92124	4.11076	166.618	4.05427e-38	5.45822e-37
22715	Zfp57	-1.47028	4.3323	166.513	4.2747e-38	5.74996e-37
241770	Rims4	4.74859	1.31718	166.404	4.51351e-38	6.06589e-37
330267	Thsd7a	-0.867423	6.42538	166.363	4.60931e-38	6.18925e-37
232370	Clstn3	5.01071	1.37367	166.338	4.66659e-38	6.2607e-37
13429	Dnm1	-1.04239	6.21721	166.325	4.69674e-38	6.29568e-37
69976	Galk2	-1.02106	5.60699	166.039	5.42476e-38	7.26522e-37
18190	Nrxn2	2.09511	3.4131	165.849	5.96924e-38	7.98749e-37
99887	Tlcd4	3.25823	1.96281	165.654	6.58259e-38	8.80057e-37
76282	Gpt	2.58852	3.25397	165.648	6.6036e-38	8.82102e-37
59038	Pxmp4	1.12466	5.72188	165.385	7.53863e-38	1.00613e-36
14373	G0s2	2.58673	7.27048	165.297	7.87909e-38	1.05066e-36
227612	Tor4a	-1.03122	5.46937	165.26	8.02536e-38	1.06924e-36
56047	Msln	-1.96614	3.16452	165.186	8.32931e-38	1.10878e-36
11468	Actg2	3.74227	5.4797	165.147	8.49609e-38	1.13e-36
27061	Bcap31	0.832944	7.52047	164.766	1.02921e-37	1.3677e-36
320309	1520401A03Rik	-3.35545	5.6996	164.41	1.23056e-37	1.63386e-36
234593	Ndrg4	-1.30254	5.11239	164.325	1.28455e-37	1.70407e-36
16854	Lgals3	1.10474	7.18931	164.313	1.29222e-37	1.71278e-36
18383	Tnfrsf11b	-1.92896	5.44762	164.291	1.30691e-37	1.73076e-36
108954	Ppp1r15b	1.08441	6.49826	164.264	1.32445e-37	1.75248e-36
12350	Car3	9.45989	9.29669	164.157	1.39753e-37	1.8476e-36
15213	Hey1	4.85245	1.74727	163.757	1.70914e-37	2.25761e-36
107515	Lgr4	1.02575	5.5512	163.729	1.73359e-37	2.28795e-36
26401	Map3k1	1.10422	5.3767	163.54	1.90687e-37	2.51449e-36
66477	Atp5md	1.06493	6.04067	163.49	1.9554e-37	2.57628e-36
77889	Lbh	-1.10988	6.87795	163.402	2.04408e-37	2.69082e-36
237759	Col23a1	1.15356	6.28407	163.369	2.07756e-37	2.73256e-36
70381	Tecpr1	0.889732	6.29587	162.964	2.54768e-37	3.34804e-36
19124	Procr	-4.04575	1.82973	162.948	2.56852e-37	3.37254e-36
78653	Bola3	1.38309	4.6826	162.603	3.05423e-37	4.00688e-36
78038	Mccc2	1.22889	5.04182	162.578	3.0938e-37	4.05536e-36
12579	Cdkn2b	1.36867	4.8709	161.92	4.30647e-37	5.64012e-36
319229	Sctr	7.59547	0.863525	161.809	4.55523e-37	5.96086e-36
235134	Nfrkb	0.920161	5.85556	161.72	4.76219e-37	6.22639e-36
170721	Papln	2.93547	3.53295	161.662	4.90425e-37	6.4067e-36
26433	Plod3	-0.872654	7.65535	161.636	4.96908e-37	6.48589e-36
15488	Hsd17b4	0.823272	7.15286	161.289	5.91513e-37	7.71419e-36
103140	Gstt3	1.23787	4.89289	161.16	6.31288e-37	8.22595e-36
18484	Pam	-0.927662	9.26168	160.541	8.62034e-37	1.12232e-35
26941	Slc9a3r1	1.28828	4.80164	160.536	8.63939e-37	1.12385e-35
17436	Me1	0.936442	6.89041	160.425	9.13593e-37	1.18744e-35
17318	Mid1	-1.25901	4.71517	160.041	1.1083e-36	1.43929e-35
214239	Ccdc9b	-1.62948	4.17931	159.995	1.13409e-36	1.47155e-35
66043	Atp5d	1.05157	7.58123	159.799	1.25182e-36	1.62294e-35
52357	Wwc2	-0.876395	6.47013	159.358	1.56301e-36	2.02469e-35
13360	Dhcr7	1.19449	4.92221	159.347	1.57158e-36	2.03408e-35
231858	Radil	2.20429	3.5759	159.24	1.65845e-36	2.14471e-35
68342	Ndufb10	1.42085	6.06081	159.032	1.84179e-36	2.37982e-35
13179	Dcn	1.27906	8.30154	158.636	2.24783e-36	2.90203e-35
69597	Afg3l2	0.852637	6.3333	158.459	2.45688e-36	3.16927e-35
194401	Mical3	0.958798	5.55682	158.441	2.47965e-36	3.19597e-35
16419	Itgb5	-0.855004	8.01126	158.377	2.56003e-36	3.29681e-35
64292	Ptges	1.09525	5.32705	158.371	2.56818e-36	3.30455e-35
66234	Msmo1	1.01382	5.98217	158.354	2.59054e-36	3.33053e-35
104111	Adcy3	-1.30648	4.85932	158.345	2.60109e-36	3.34132e-35
319430	C5ar2	5.98672	1.0283	158.242	2.74007e-36	3.51692e-35
19152	Prtn3	2.27808	3.04169	158.22	2.76992e-36	3.55227e-35
227753	Gsn	1.21018	11.0569	158.107	2.93292e-36	3.75818e-35
66848	Fuca2	-1.33794	4.71169	157.909	3.23924e-36	4.14724e-35
94280	Sfxn3	-0.921986	6.77501	157.748	3.51293e-36	4.49393e-35
18295	Ogn	1.02634	11.091	157.745	3.51894e-36	4.49788e-35
18263	Odc1	-0.876272	8.30482	157.389	4.2078e-36	5.37392e-35
22381	Tceal9	-1.00485	6.02488	157.246	4.52309e-36	5.7718e-35
16337	Insr	0.843913	6.40273	157.228	4.56449e-36	5.81982e-35
75805	Nln	0.944005	6.2499	156.916	5.33924e-36	6.80202e-35
56551	Txn2	0.871536	6.75162	156.718	5.89953e-36	7.5096e-35
11529	Adh7	1.97637	3.81313	156.605	6.24275e-36	7.93994e-35
20947	Swap70	-0.874425	6.6993	156.402	6.91638e-36	8.78945e-35
18479	Pak1	-1.11983	5.50011	156.36	7.06341e-36	8.96891e-35
26364	Adgre5	1.2775	5.20268	156.228	7.54828e-36	9.57669e-35
319909	Ism1	-1.03107	7.47089	156.146	7.86625e-36	9.97189e-35
22339	Vegfa	1.09939	8.13906	155.972	8.58457e-36	1.08736e-34
59027	Nampt	1.0047	6.8119	155.899	8.90825e-36	1.12743e-34
75552	Paqr9	9.69156	0.64677	155.58	1.046e-35	1.32273e-34
105387	Akr1c14	-2.19276	3.42779	155.443	1.12054e-35	1.41583e-34
69662	2310061I04Rik	1.47068	4.42679	155.359	1.16888e-35	1.47569e-34
14467	Nipsnap2	0.875948	6.36468	155.109	1.32557e-35	1.67215e-34
240843	Brinp2	5.97815	1.03626	155.099	1.33223e-35	1.67918e-34
214444	Cdk5rap2	-1.00177	5.7154	154.929	1.45145e-35	1.82796e-34
20503	Slc16a7	1.96751	3.27818	154.858	1.50377e-35	1.8923e-34
270076	Gcdh	1.04497	5.20377	154.531	1.77331e-35	2.22966e-34
16918	Mycl	3.88559	1.69034	154.459	1.8379e-35	2.3071e-34
235493	Fam214a	1.14141	5.60408	154.46	1.83697e-35	2.3071e-34
18807	Pld3	-0.827758	7.42882	154.28	2.01166e-35	2.52317e-34
212898	Dse	-0.81864	6.97012	154.029	2.28238e-35	2.86039e-34
80292	Zxdc	1.16676	5.47434	154.025	2.28659e-35	2.86334e-34
226866	Sbspon	2.44256	2.40199	153.912	2.42028e-35	3.02829e-34
21847	Klf10	1.33997	4.43459	153.864	2.47965e-35	3.10007e-34
54616	Extl3	0.850947	6.97926	153.805	2.55471e-35	3.19132e-34
13830	Stom	1.04545	6.53507	153.619	2.80546e-35	3.50171e-34
73182	Pear1	-0.940497	6.17146	153.601	2.83084e-35	3.53054e-34
229731	Slc25a24	-1.02643	5.64636	153.404	3.12628e-35	3.89584e-34
14313	Fst	-0.899615	5.99651	153.376	3.17104e-35	3.94843e-34
17912	Myo1b	-0.894507	6.27355	153.358	3.19881e-35	3.97979e-34
26611	Rcn2	-0.857298	7.26182	153.348	3.216e-35	3.99795e-34
69634	Clybl	1.1391	4.99502	153.119	3.6081e-35	4.48178e-34
20618	Sncg	1.85081	3.26741	153.028	3.77662e-35	4.68733e-34
327958	Pitpnm3	1.79062	4.17124	153.017	3.79708e-35	4.70893e-34
66090	Ypel3	-0.871343	6.42329	152.976	3.87697e-35	4.80414e-34
14251	Flot1	-0.808582	6.72699	152.855	4.12136e-35	5.10287e-34
68852	Lrrn4cl	-1.19035	5.4779	152.833	4.16597e-35	5.15396e-34
13688	Eif4ebp2	0.89616	5.89406	152.791	4.25636e-35	5.26157e-34
12261	C1qbp	0.920767	6.23416	152.5	4.92705e-35	6.08577e-34
54394	Crlf3	-1.04864	5.70034	152.244	5.60498e-35	6.91759e-34
70861	Akr1cl	9.6877	0.647367	152.133	5.9271e-35	7.3093e-34
239405	Rspo2	1.30622	4.64222	152.105	6.00973e-35	7.40527e-34
67956	Kmt5a	0.8173	7.31154	152.058	6.15506e-35	7.57829e-34
244954	Prss35	2.34777	3.02768	151.798	7.01382e-35	8.62873e-34
27362	Dnajb9	0.987366	5.959	151.758	7.15765e-35	8.79866e-34
235135	Tmem45b	6.99044	1.11714	151.719	7.29904e-35	8.95818e-34
93732	Acox2	-2.58134	2.95077	151.719	7.29897e-35	8.95818e-34
56613	Rps6ka4	-0.897263	6.1242	151.613	7.69818e-35	9.44053e-34
12797	Cnn1	0.850775	7.58676	151.529	8.03037e-35	9.84008e-34
13476	Reep5	0.879721	7.96049	151.356	8.75975e-35	1.07253e-33
89867	Sec16b	-1.2215	4.57362	151.161	9.66557e-35	1.1825e-33
26940	Ecsit	1.34306	4.26583	150.96	1.06948e-34	1.30738e-33
94044	Bcl2l13	0.943461	5.96423	150.829	1.14217e-34	1.39513e-33
11981	Atp9a	1.26777	5.7802	150.807	1.15484e-34	1.40949e-33
66552	Sppl2a	-0.838007	6.75162	150.763	1.1806e-34	1.43979e-33
239217	Kctd12	1.25586	4.92209	150.687	1.22693e-34	1.49511e-33
56233	Hdac7	-0.905494	6.53568	150.55	1.31413e-34	1.6001e-33
232748	Tcaf2	-1.6117	4.41938	150.319	1.47683e-34	1.79679e-33
66117	Fmc1	2.15037	2.88141	150.301	1.48971e-34	1.81104e-33
16987	Lss	1.04863	5.52219	150.196	1.57119e-34	1.90858e-33
15275	Hk1	-0.806254	6.58159	150.109	1.64109e-34	1.99193e-33
53322	Nucb2	-1.15308	5.0636	150.041	1.69831e-34	2.05976e-33
66350	Pla2g12a	1.35084	4.24655	149.919	1.80606e-34	2.18871e-33
11670	Aldh3a1	5.12828	1.12782	149.718	1.99819e-34	2.41965e-33
97212	Hadha	0.863612	7.99677	149.612	2.10714e-34	2.54957e-33
21353	Tank	1.13065	5.84915	149.599	2.12091e-34	2.56422e-33
56325	Abcb9	1.68231	3.45963	149.529	2.19776e-34	2.65505e-33
23797	Akt3	-1.13362	4.95061	149.281	2.48938e-34	3.00499e-33
71767	Tysnd1	0.987165	5.85068	149.132	2.68398e-34	3.23737e-33
108657	Rnpepl1	0.946659	5.78474	148.799	3.17259e-34	3.82373e-33
19085	Prkar1b	-2.23134	2.86651	148.672	3.38304e-34	4.07418e-33
50795	Sh3bgr	4.27561	1.55729	148.435	3.8114e-34	4.58647e-33
15931	Ids	-0.882525	6.79886	148.431	3.81805e-34	4.59089e-33
14958	H1f0	-0.800205	7.65522	148.41	3.85901e-34	4.63653e-33
14866	Gstm5	-0.869389	5.87801	148.305	4.06797e-34	4.88379e-33
19294	Nectin2	-1.16705	4.96548	148.281	4.11895e-34	4.94114e-33
217707	Coq6	1.38215	4.83737	147.896	4.99853e-34	5.99163e-33
77411	Esrp2	2.31458	2.77548	147.853	5.10798e-34	6.11807e-33
74143	Opa1	0.839573	6.66422	147.662	5.62289e-34	6.72957e-33
208266	Dot1l	0.86012	6.29933	147.37	6.51525e-34	7.79151e-33
319707	C430002N11Rik	-4.63861	1.08828	147.311	6.71186e-34	8.02041e-33
224697	Adamts10	-1.06208	5.15623	147.191	7.12777e-34	8.51082e-33
68797	Pdgfrl	-1.27893	4.67054	147.119	7.39293e-34	8.82058e-33
15957	Ifit1	-2.09254	4.24161	147.07	7.57567e-34	9.03162e-33
67270	Mrpl42	1.00477	5.55765	146.952	8.03992e-34	9.5777e-33
232536	Mrps35	1.34709	4.67158	146.948	8.05654e-34	9.59008e-33
66168	Grina	0.863902	7.97691	146.855	8.43987e-34	1.00386e-32
67689	Aldh3b1	-1.52381	4.00377	146.696	9.14614e-34	1.08703e-32
68565	Mrps18a	1.08856	4.88965	146.618	9.5127e-34	1.12972e-32
226518	Nmnat2	3.14701	3.09553	146.391	1.06643e-33	1.26551e-32
12834	Col6a2	0.971305	10.0817	146.368	1.07846e-33	1.27881e-32
56473	Fads2	0.969845	5.86612	146.146	1.20624e-33	1.42923e-32
56213	Htra1	0.831668	8.00932	146.046	1.26836e-33	1.50167e-32
21677	Tead2	-0.933435	5.61268	145.93	1.34477e-33	1.59092e-32
19765	Ralbp1	-0.823235	6.69131	145.856	1.39586e-33	1.65009e-32
50997	Mpp2	-2.06121	3.15307	145.833	1.41187e-33	1.66774e-32
20887	Sult1a1	1.83037	3.69592	145.589	1.59695e-33	1.88491e-32
109880	Braf	-1.06226	6.20801	145.584	1.60061e-33	1.88779e-32
229841	Cenpe	-1.5594	4.3848	145.525	1.64905e-33	1.94344e-32
11804	Aplp2	0.840603	10.2894	145.475	1.69063e-33	1.99092e-32
18027	Nfia	0.875446	6.54605	145.292	1.85362e-33	2.18119e-32
110380	Shroom2	-1.52253	4.21205	144.936	2.21802e-33	2.60799e-32
320609	Strip2	2.93455	4.3754	144.933	2.22117e-33	2.60971e-32
66277	Klf15	1.01571	5.39334	144.899	2.25928e-33	2.65246e-32
83453	Chrdl1	1.82444	6.26335	144.774	2.40604e-33	2.82261e-32
216152	Plppr3	1.07729	6.37363	144.737	2.45139e-33	2.87363e-32
19730	Ralgds	0.797993	7.01944	144.507	2.7525e-33	3.22415e-32
13636	Efna1	-1.85141	3.82858	144.012	3.5321e-33	4.13419e-32
17700	Mstn	6.12074	1.44155	143.986	3.57796e-33	4.18469e-32
56177	Olfm1	1.45566	4.07358	143.857	3.81848e-33	4.46262e-32
15205	Hes1	1.283	4.43701	143.667	4.20117e-33	4.90613e-32
107250	Kazald1	1.87391	3.47576	143.526	4.51028e-33	5.26313e-32
192185	Nadk	0.797245	7.46024	143.508	4.55081e-33	5.30642e-32
218756	Slc4a7	0.936291	5.88392	143.499	4.5715e-33	5.32651e-32
102657	Cd276	-1.10136	4.98952	143.458	4.66652e-33	5.43311e-32
11853	Rhoc	-0.847779	6.70732	143.338	4.95946e-33	5.76982e-32
65960	Twsg1	-0.850534	8.01615	143.201	5.31195e-33	6.17524e-32
107371	Exoc6	2.18517	2.73106	143.097	5.59724e-33	6.50199e-32
14281	Fos	-1.7142	3.64949	143.048	5.73768e-33	6.66012e-32
102247	Gpat4	0.798258	7.17467	142.971	5.96352e-33	6.91705e-32
66949	Trim59	-1.12547	5.22525	142.856	6.31989e-33	7.32489e-32
404634	Macroh2a2	-1.05152	5.14548	142.682	6.89771e-33	7.98859e-32
27361	Msrb1	0.924714	6.02544	142.623	7.10704e-33	8.22485e-32
16194	Il6ra	-1.7058	3.48647	142.238	8.6245e-33	9.97349e-32
271127	Adamts16	-0.863994	6.23775	142.159	8.97648e-33	1.03727e-31
66092	Ghitm	0.84477	7.67439	141.768	1.09289e-32	1.26194e-31
68119	Cmtm3	-0.890391	5.64267	141.436	1.29177e-32	1.49046e-31
93735	Wnt16	-1.43463	4.3544	141.361	1.34163e-32	1.54684e-31
24131	Ldb3	1.90616	3.71642	141.248	1.42003e-32	1.636e-31
219189	Vwa8	0.826271	6.15302	141.205	1.45148e-32	1.67099e-31
212167	Gsap	-2.43298	2.68957	141.124	1.51155e-32	1.73884e-31
110265	Msra	1.75662	3.40583	140.745	1.82931e-32	2.10282e-31
17698	Msn	-0.85076	8.23193	140.671	1.89873e-32	2.18099e-31
72590	Ppme1	-0.839496	6.1851	140.609	1.95924e-32	2.24882e-31
20425	Shmt1	1.77317	3.4702	140.561	2.00682e-32	2.30172e-31
228607	Mavs	0.936645	5.78218	140.22	2.3824e-32	2.73046e-31
69146	Gsdmd	-1.66714	4.12159	140.077	2.56055e-32	2.93246e-31
16924	Lnx1	-1.21788	5.45338	139.969	2.70337e-32	3.09373e-31
66052	Sdhc	0.794718	7.44142	139.772	2.98542e-32	3.41396e-31
170728	Rtn4ip1	1.59713	3.90663	139.74	3.03456e-32	3.46758e-31
100038882	Isg15	-2.33377	3.62614	139.71	3.08134e-32	3.51843e-31
270120	Fat3	5.12163	0.95327	139.699	3.09778e-32	3.53459e-31
56050	Cyp39a1	-1.76155	3.95339	139.591	3.27157e-32	3.73012e-31
215819	Nhsl1	-1.19236	4.70994	139.405	3.59207e-32	4.09252e-31
50908	C1s1	-0.89821	7.79302	139.309	3.76946e-32	4.29145e-31
16425	Itih2	-1.96896	3.70543	139.276	3.8324e-32	4.35988e-31
53333	Tomm40	0.940359	5.86251	139.147	4.09108e-32	4.65074e-31
71797	Chst13	5.16424	1.152	139.042	4.31279e-32	4.89917e-31
230099	Car9	-4.57588	6.73467	139.033	4.33138e-32	4.91666e-31
20346	Sema3a	-2.03627	2.80516	139.012	4.37858e-32	4.96658e-31
13876	Erg	-1.69714	3.59458	138.972	4.46634e-32	5.0624e-31
19024	Ppfibp2	2.74386	2.17492	138.908	4.61248e-32	5.22421e-31
14299	Ncs1	-0.846232	5.78086	138.803	4.86423e-32	5.5053e-31
17540	Irag1	1.35593	4.51546	138.633	5.29816e-32	5.99201e-31
14560	Gdf10	4.41886	2.63651	138.566	5.48035e-32	6.19352e-31
21848	Trim24	0.838357	6.54864	138.231	6.48679e-32	7.32556e-31
66377	Ndufc1	0.983627	5.56636	138.194	6.60885e-32	7.45793e-31
57265	Fzd2	-0.920791	7.69496	137.954	7.45848e-32	8.41057e-31
17701	Msx1	0.979177	5.14325	137.902	7.65657e-32	8.62764e-31
67528	Nudt7	1.33912	4.45827	137.815	7.99864e-32	9.00651e-31
17921	Myo7a	-1.24488	5.03079	137.772	8.17591e-32	9.19939e-31
230935	Dnajc11	0.910533	5.82993	137.726	8.364e-32	9.40417e-31
66977	Nuf2	-1.73211	3.47945	137.696	8.49113e-32	9.54015e-31
107449	Unc5b	0.816695	6.27949	137.477	9.48371e-32	1.06476e-30
77583	Notum	3.50608	2.05603	137.252	1.0621e-31	1.19158e-30
56690	Mlycd	1.1428	4.64837	137.205	1.08778e-31	1.2195e-30
15199	Hebp1	1.51786	3.83663	137.113	1.13936e-31	1.2764e-30
71833	Dcaf7	-0.804147	6.78496	136.599	1.47568e-31	1.65196e-30
229285	Spg20	-0.867433	6.37494	136.164	1.83696e-31	2.05492e-30
67092	Gatm	2.39046	2.33033	136.083	1.91363e-31	2.13913e-30
11639	Ak4	-1.22135	5.04201	136.042	1.95351e-31	2.18212e-30
65256	Asb2	3.60118	1.7611	136.005	1.99025e-31	2.22156e-30
69574	Cmbl	4.82383	2.44157	135.968	2.02787e-31	2.26191e-30
71373	Prr16	1.40128	4.10658	135.861	2.14029e-31	2.38558e-30
226139	Cox15	0.986373	5.51376	135.787	2.22163e-31	2.47445e-30
67484	Eepd1	1.77472	3.46038	135.74	2.27414e-31	2.53111e-30
68709	Cilp2	2.23091	2.42462	135.508	2.5566e-31	2.84343e-30
18542	Pcolce	-0.907703	8.83219	135.415	2.67858e-31	2.97695e-30
50527	Ero1a	-0.905823	6.06813	135.278	2.87041e-31	3.18785e-30
56374	Tmem59	-0.772266	8.03849	135.209	2.97203e-31	3.29833e-30
229905	Kyat3	1.7667	3.64591	135.19	3.0001e-31	3.32709e-30
26934	Racgap1	-1.30928	4.78436	134.981	3.33419e-31	3.69493e-30
67451	Pkp2	2.00002	2.73548	134.935	3.41183e-31	3.77826e-30
68778	Gucd1	1.13076	5.04682	134.908	3.4578e-31	3.82642e-30
11841	Arf2	-0.825164	6.36436	134.757	3.73072e-31	4.12546e-30
19246	Ptpn1	-0.79969	6.20768	134.254	4.80829e-31	5.31325e-30
20111	Rps6ka1	-1.78082	3.1464	134.223	4.88415e-31	5.39321e-30
20652	Soat1	-0.887272	6.04858	134.179	4.99225e-31	5.50863e-30
76901	Jade2	-0.995901	5.24323	134.172	5.01085e-31	5.5252e-30
621976	Tmem170b	1.22357	4.37259	134.168	5.01902e-31	5.53025e-30
110157	Raf1	0.767582	7.23247	133.848	5.89938e-31	6.49564e-30
94040	Clmn	-1.09942	7.3253	133.736	6.24065e-31	6.86649e-30
17174	Masp1	-1.155	4.57136	133.705	6.33929e-31	6.97005e-30
59125	Nek7	-0.785845	6.75293	133.615	6.63218e-31	7.28689e-30
217030	Synrg	0.828181	5.90467	133.469	7.13968e-31	7.8389e-30
76820	Cyria	2.11539	2.96872	133.422	7.30999e-31	8.02018e-30
330406	B4galnt3	3.01295	1.90483	133.346	7.59572e-31	8.32774e-30
52398	Septin11	-0.896852	8.2854	133.16	8.34293e-31	9.14045e-30
72169	Trim29	6.70113	0.862155	133.14	8.42347e-31	9.22215e-30
11513	Adcy7	-2.61682	3.36939	133.125	8.4889e-31	9.28718e-30
75202	Spaca6	-1.36231	5.18291	133.116	8.52765e-31	9.32296e-30
28030	Gfm1	0.865546	5.87937	133.034	8.88879e-31	9.7109e-30
329872	Frem1	2.32323	2.41981	132.751	1.0248e-30	1.11879e-29
21379	Tbrg4	0.937233	5.26974	132.71	1.04639e-30	1.14155e-29
70122	Mllt3	-0.972331	5.55106	132.702	1.05067e-30	1.1454e-29
18007	Neo1	-0.744031	7.60735	132.6	1.10583e-30	1.20468e-29
12051	Bcl3	-1.82282	3.7999	132.501	1.16246e-30	1.26549e-29
15368	Hmox1	-0.900062	6.26562	132.498	1.16423e-30	1.26652e-29
53600	Timm23	0.88422	5.76956	132.279	1.30028e-30	1.41353e-29
56419	Diaph3	-1.42325	4.11733	132.164	1.37779e-30	1.49673e-29
17748	Mt1	0.750355	6.97663	132.056	1.45421e-30	1.57864e-29
19248	Ptpn12	-0.965685	5.70513	132.013	1.48671e-30	1.61278e-29
320806	Gfm2	0.95581	5.21634	131.925	1.55401e-30	1.6846e-29
14066	F3	-0.888145	7.17081	131.9	1.57338e-30	1.70441e-29
140580	Elmo1	-2.30245	2.85477	131.888	1.58274e-30	1.71334e-29
74161	Ctcflos	7.31298	0.585244	131.852	1.61238e-30	1.7442e-29
70575	Gfod2	1.05289	4.99322	131.653	1.78207e-30	1.92641e-29
19293	Pvalb	6.08426	0.887547	131.553	1.87411e-30	2.02449e-29
13346	Des	0.992336	5.51159	131.507	1.91823e-30	2.07069e-29
68743	Anln	-0.945436	6.10325	131.492	1.93229e-30	2.08441e-29
654812	Angptl7	1.6789	3.78953	131.309	2.11965e-30	2.28493e-29
71660	Rarres2	1.72159	3.28432	131.098	2.35676e-30	2.53874e-29
235442	Rab8b	-0.912395	5.60678	131.027	2.44241e-30	2.62917e-29
20971	Sdc4	-0.973389	8.26767	130.913	2.58732e-30	2.78322e-29
192734	Lrrc75b	1.66581	3.52635	130.755	2.80099e-30	3.01097e-29
18824	Plp2	-0.974179	5.82866	130.733	2.83324e-30	3.04351e-29
20678	Sox5	-1.29623	4.69284	130.195	3.71448e-30	3.98738e-29
60596	Gucy1a1	7.3725	0.627222	130.127	3.84392e-30	4.12345e-29
72634	Tdrkh	2.43416	2.55766	130.105	3.88646e-30	4.16619e-29
76293	Mfap4	-5.17019	2.16579	129.878	4.35818e-30	4.66862e-29
244895	Peak1	-0.983757	7.83745	129.75	4.64843e-30	4.97608e-29
12048	Bcl2l1	0.97217	5.98324	129.688	4.79625e-30	5.13075e-29
72461	Prcp	-1.13213	4.67937	129.682	4.80983e-30	5.14171e-29
12400	Cbfb	-0.773454	6.29661	129.545	5.15226e-30	5.50396e-29
19091	Prkg1	-0.960146	5.42735	129.397	5.55191e-30	5.92678e-29
19275	Ptprn	-2.18422	2.64341	129.35	5.6857e-30	6.0654e-29
432486	Gnptab	0.765832	6.69717	129.189	6.16513e-30	6.5723e-29
14584	Gfpt2	-1.48776	4.11415	128.767	7.62502e-30	8.12299e-29
18704	Pik3c2a	-0.848798	6.51768	128.602	8.28829e-30	8.82348e-29
16182	Il18r1	-4.96435	1.29894	128.542	8.54325e-30	9.08863e-29
74637	Shpk	1.4366	3.73519	128.486	8.78636e-30	9.34081e-29
27402	Pdhx	1.16645	5.02679	128.253	9.8821e-30	1.04985e-28
11443	Chrnb1	1.52283	4.03454	128.085	1.07537e-29	1.14165e-28
192156	Mvd	1.30742	4.24136	128.071	1.08274e-29	1.14869e-28
16000	Igf1	1.03426	8.2891	127.861	1.20397e-29	1.27642e-28
14629	Gclc	0.938568	5.37567	127.784	1.25177e-29	1.32619e-28
226646	Ndufs2	0.741134	7.77813	127.771	1.25965e-29	1.33362e-28
109232	Sccpdh	0.833731	6.05236	127.629	1.35344e-29	1.43193e-28
67776	Vwa5a	-0.775493	7.46288	127.543	1.41282e-29	1.49373e-28
228033	Atp5g3	1.33214	7.53608	127.265	1.62569e-29	1.71762e-28
20848	Stat3	-0.778999	8.16058	127.194	1.68436e-29	1.77838e-28
11950	Atp5pb	0.889572	7.58519	127.056	1.80602e-29	1.90553e-28
74610	Abcb8	1.02846	5.13459	126.979	1.87723e-29	1.97931e-28
58172	Sertad2	-0.875398	6.24625	126.953	1.90188e-29	2.00393e-28
13653	Egr1	-0.978109	6.18189	126.744	2.11319e-29	2.22506e-28
68794	Flnc	-0.741883	7.84506	126.74	2.11792e-29	2.22851e-28
66222	Serpinb1a	1.04747	5.01363	126.717	2.1421e-29	2.25242e-28
21345	Tagln	0.801868	9.44038	126.673	2.1908e-29	2.30206e-28
83602	Gtf2a1	0.899312	5.56318	126.441	2.46264e-29	2.58594e-28
13663	Ei24	0.777087	6.04543	126.388	2.52875e-29	2.65355e-28
71679	Atp5h	0.876158	7.27565	126.309	2.63136e-29	2.75935e-28
103266	Tmem263	-0.893454	5.65611	126.253	2.7062e-29	2.8359e-28
56401	P3h1	-0.863465	6.78814	126.221	2.75095e-29	2.88084e-28
17872	Ppp1r15a	-1.1159	4.56135	126.214	2.76075e-29	2.88913e-28
381314	Iars2	0.77496	6.95124	126.149	2.85295e-29	2.9836e-28
71770	Ap2b1	-0.724264	7.72493	126.086	2.94462e-29	3.07738e-28
70423	Tspan15	2.26353	3.11633	125.993	3.08565e-29	3.22258e-28
13033	Ctsd	1.09621	10.7894	125.868	3.28561e-29	3.42909e-28
17156	Man1a2	-0.739055	7.38657	125.86	3.29997e-29	3.44175e-28
67893	Tmem86a	-1.31661	4.35791	125.857	3.30499e-29	3.44465e-28
226025	Trpm3	2.02478	3.01231	125.686	3.60271e-29	3.75242e-28
74182	Gpcpd1	0.913342	5.63359	125.679	3.61513e-29	3.76281e-28
19224	Ptgs1	-1.64265	3.46158	125.599	3.76387e-29	3.91498e-28
213053	Slc39a14	-0.84271	6.04298	125.362	4.23983e-29	4.40708e-28
80291	Rilpl2	1.00751	5.42441	125.271	4.43976e-29	4.61179e-28
66425	Pcp4l1	-0.758289	6.63516	125.232	4.52879e-29	4.70109e-28
210094	Iglon5	-2.01606	2.75011	125.175	4.65932e-29	4.83334e-28
394435	Ugt1a6b	3.59081	1.60181	125.163	4.68757e-29	4.85937e-28
11827	Aqp2	1.70224	3.1179	125.15	4.71876e-29	4.88842e-28
213649	Arhgef19	-1.08552	4.6475	125.123	4.78259e-29	4.95122e-28
68026	Pclaf	-1.69225	4.27711	125.099	4.84126e-29	5.0086e-28
74769	Pik3cb	-1.05994	4.86461	125.013	5.05519e-29	5.22641e-28
17309	Mgat3	-1.19069	4.4461	124.584	6.27671e-29	6.48313e-28
17218	Mcm5	-1.32886	4.23764	124.583	6.27915e-29	6.48313e-28
11488	Adam11	1.67137	3.53323	124.575	6.30663e-29	6.50714e-28
63953	Dusp10	1.78773	3.56526	124.504	6.53582e-29	6.73911e-28
67839	Gpsm1	-0.919062	5.54896	124.482	6.60712e-29	6.80807e-28
117198	Ivns1abp	0.808365	7.42933	124.467	6.65858e-29	6.85651e-28
18845	Plxna2	0.84651	6.25231	124.424	6.80479e-29	7.0024e-28
16897	Llgl1	-0.730921	6.42511	124.177	7.70498e-29	7.92344e-28
14073	Faah	-1.575	5.55604	124.102	8.00126e-29	8.22263e-28
16494	Kcna6	-2.38811	2.60123	123.994	8.45185e-29	8.6799e-28
76884	Cyfip2	3.27207	1.85597	123.69	9.85068e-29	1.01097e-27
270110	Irf2bp2	0.978136	6.95259	123.569	1.04671e-28	1.07352e-27
217149	Cisd3	1.4756	4.37153	123.541	1.06147e-28	1.08794e-27
235505	Cd109	-1.22627	4.33818	123.521	1.07257e-28	1.09859e-27
11409	Acads	0.921975	5.8786	123.391	1.14522e-28	1.17222e-27
11937	Atp2a1	1.27906	4.30433	123.372	1.15598e-28	1.18245e-27
17691	Sik1	1.33196	4.50085	123.191	1.26657e-28	1.29471e-27
11933	Atp1b3	0.78522	8.38321	123.101	1.32536e-28	1.35391e-27
107734	Mrpl30	0.802435	5.87956	122.915	1.45575e-28	1.48612e-27
382014	Ano8	0.789324	6.16962	122.907	1.46168e-28	1.49119e-27
67212	Mrpl55	1.18383	4.28056	122.89	1.47411e-28	1.50287e-27
12442	Ccnb2	-1.44553	3.82763	122.878	1.48277e-28	1.5107e-27
74533	Gzf1	0.796895	5.79872	122.871	1.48853e-28	1.51557e-27
98496	Pid1	1.50239	3.82684	122.862	1.49464e-28	1.52078e-27
20358	Sema6a	2.49997	2.71344	122.79	1.55041e-28	1.57649e-27
74244	Atg7	0.916457	5.51472	122.599	1.70704e-28	1.7346e-27
102442	Dennd4a	-1.08525	5.21426	122.562	1.73879e-28	1.76571e-27
18175	Nrap	1.99379	2.98133	122.496	1.79736e-28	1.82398e-27
94192	C1galt1	-0.970151	5.01878	122.379	1.90667e-28	1.93364e-27
67388	Rab5if	0.874887	5.54508	122.368	1.91779e-28	1.94363e-27
319278	Shfl	-1.4196	3.78409	122.277	2.00807e-28	2.0338e-27
66913	Kdelr2	-0.763619	7.22167	122.146	2.14486e-28	2.17092e-27
53978	Lpar2	-1.61184	3.42918	122.082	2.21486e-28	2.24029e-27
56421	Pfkp	-0.863059	6.22049	121.951	2.36655e-28	2.39216e-27
16157	Il11ra1	0.859107	7.87666	121.898	2.43016e-28	2.45485e-27
268345	Kcnc2	9.30712	0.27916	121.26	3.35163e-28	3.38345e-27
66859	Slc16a9	1.49792	3.56253	120.728	4.38225e-28	4.42097e-27
229473	Tmem131l	0.905941	5.32095	120.722	4.39636e-28	4.4323e-27
78330	Ndufv3	0.866474	6.08076	120.629	4.60799e-28	4.64263e-27
12373	Casq2	1.53803	4.52545	120.626	4.61324e-28	4.64488e-27
243755	Slc13a4	4.88211	1.08265	120.503	4.90881e-28	4.93925e-27
194126	Mtmr11	-2.46682	3.22503	120.477	4.97484e-28	5.00243e-27
78889	Wsb1	-0.737723	7.98886	120.472	4.98756e-28	5.01195e-27
66488	Fam136a	1.03363	5.4137	120.466	5.00151e-28	5.02269e-27
100434	Slc44a1	-0.869945	7.0259	120.446	5.05114e-28	5.06923e-27
68585	Rtn4	-0.751185	8.72919	120.361	5.2728e-28	5.28824e-27
259277	Klk8	5.957	0.727331	120.277	5.50297e-28	5.5155e-27
20200	S100a6	-0.797608	8.14122	120.215	5.67596e-28	5.68518e-27
382571	Kcnf1	3.41706	1.49468	120.161	5.83309e-28	5.83877e-27
230082	Nol6	0.82881	6.2352	120.135	5.91017e-28	5.91209e-27
13371	Dio2	1.36552	3.86879	120.034	6.21846e-28	6.21241e-27
269713	Clip2	-0.775531	6.12446	120.034	6.21716e-28	6.21241e-27
68917	Hint2	1.30387	4.08522	119.989	6.36014e-28	6.34985e-27
319604	Fam168a	-0.72461	6.55871	119.908	6.62673e-28	6.61171e-27
72599	Pdia5	-1.28891	4.56691	119.823	6.91501e-28	6.89488e-27
14257	Flt4	-2.04961	2.65327	119.706	7.33536e-28	7.30928e-27
224170	Dzip3	-0.840235	5.67812	119.686	7.41176e-28	7.38064e-27
57264	Retn	5.526	0.832457	119.572	7.84882e-28	7.81082e-27
18817	Plk1	-1.3653	3.93597	119.526	8.03165e-28	7.98761e-27
71963	Cdca4	-1.05493	4.8533	119.516	8.07299e-28	8.02354e-27
217882	Cep170b	-0.760084	6.49339	119.488	8.18857e-28	8.13317e-27
74513	Neto2	1.14491	5.20996	119.438	8.39619e-28	8.33401e-27
108946	Zzz3	-0.71738	6.98423	119.394	8.58838e-28	8.51929e-27
211712	Pcdh9	-0.863701	5.46719	119.325	8.89217e-28	8.81497e-27
16391	Irf9	-0.964979	5.55582	119.244	9.26092e-28	9.17462e-27
20623	Snrk	0.737894	6.37009	119.017	1.03825e-27	1.02791e-26
20362	Septin8	-0.706616	6.8203	119.005	1.04466e-27	1.03359e-26
16911	Lmo4	0.735523	7.48806	118.915	1.09317e-27	1.0809e-26
226442	Zfp281	-0.769058	5.91756	118.876	1.11465e-27	1.10143e-26
230027	Coq3	1.21576	4.12336	118.865	1.12107e-27	1.10706e-26
72136	Chst14	-1.0155	5.22047	118.835	1.13837e-27	1.12343e-26
21937	Tnfrsf1a	-0.706943	7.29521	118.8	1.15821e-27	1.14228e-26
320253	Marchf3	-1.16599	5.1946	118.725	1.20321e-27	1.1859e-26
57425	U90926	-5.65305	0.636093	118.699	1.21867e-27	1.20037e-26
231148	Ablim2	3.35795	2.0442	118.458	1.37654e-27	1.355e-26
17760	Map6	-1.04449	5.01614	118.427	1.39822e-27	1.37547e-26
66246	Osgep	0.807727	5.71385	118.358	1.44753e-27	1.42307e-26
230752	Eva1b	-1.00243	5.98755	118.331	1.46752e-27	1.4418e-26
19401	Rara	0.768576	6.10917	118.329	1.46889e-27	1.44223e-26
67856	Echdc3	1.77842	2.8603	118.164	1.59591e-27	1.56594e-26
209692	Dhtkd1	1.28945	3.97553	118.114	1.63687e-27	1.60511e-26
237459	Cdk17	-0.920881	5.97546	117.933	1.79316e-27	1.75726e-26
14863	Gstm2	-0.774309	5.95762	117.864	1.85679e-27	1.81845e-26
13602	Sparcl1	2.57724	2.13169	117.836	1.88327e-27	1.84321e-26
69219	Ddah1	-0.80118	6.94795	117.801	1.9168e-27	1.87484e-26
15529	Sdc2	0.742587	8.63157	117.757	1.95948e-27	1.91537e-26
28295	Gatd3a	0.917391	6.09687	117.643	2.07552e-27	2.02752e-26
80796	Calm4	9.43461	0.428545	117.472	2.26273e-27	2.209e-26
11548	Adra1b	3.39942	2.14892	117.45	2.28783e-27	2.23209e-26
67573	Loxl4	-2.02246	5.61015	117.416	2.3271e-27	2.26896e-26
104112	Acly	0.748752	8.09817	117.317	2.44711e-27	2.38446e-26
224024	Scarf2	-0.915004	7.73784	117.297	2.47114e-27	2.40636e-26
14609	Gja1	0.944713	5.61101	117.249	2.53146e-27	2.46353e-26
107589	Mylk	0.963171	7.95815	117.242	2.54122e-27	2.47148e-26
15531	Ndst1	-0.745199	7.16587	117.23	2.55614e-27	2.48442e-26
74198	Dtx2	1.05906	4.88138	117.021	2.84055e-27	2.75911e-26
319876	Cobll1	-1.01898	6.42878	116.784	3.20142e-27	3.10767e-26
67621	Bend5	2.32117	2.28962	116.727	3.29471e-27	3.19622e-26
434197	Fam169b	-2.88288	3.08434	116.607	3.49932e-27	3.39258e-26
319996	Golm2	-0.764585	6.45266	116.473	3.74476e-27	3.62825e-26
16828	Ldha	-0.908652	9.93101	116.462	3.76566e-27	3.6462e-26
230779	Serinc2	-2.7619	3.76606	116.181	4.33756e-27	4.19733e-26
12955	Cryab	-0.934508	6.16592	116.057	4.61838e-27	4.46627e-26
16440	Itpr3	-0.781297	6.38744	116.043	4.65133e-27	4.49531e-26
21812	Tgfbr1	0.778731	6.08234	115.984	4.79134e-27	4.62772e-26
109700	Itga1	-0.827303	8.02371	115.831	5.17551e-27	4.99564e-26
26926	Aifm1	0.860274	5.5137	115.826	5.18954e-27	5.00606e-26
12611	Cebpg	0.754196	6.19175	115.811	5.22874e-27	5.03931e-26
69195	Tmem121	-2.07033	2.73204	115.81	5.23055e-27	5.03931e-26
269717	Orai2	-1.37437	3.69697	115.729	5.44855e-27	5.24606e-26
66435	Uggt2	-0.936035	5.19324	115.685	5.5724e-27	5.36195e-26
215751	Ginm1	0.711934	6.53863	115.678	5.58998e-27	5.37551e-26
14782	Gsr	1.18296	5.21777	115.652	5.66536e-27	5.44461e-26
103968	Plin1	8.26215	8.55659	115.593	5.8369e-27	5.60597e-26
319277	Washc4	-0.729205	6.48008	115.528	6.02989e-27	5.78772e-26
218865	Chdh	1.13209	5.0031	115.379	6.50061e-27	6.23565e-26
230514	Leprot	-0.753964	6.58647	115.362	6.55792e-27	6.28671e-26
110052	Dek	-0.856777	6.46427	115.255	6.92155e-27	6.63118e-26
192657	Ell2	0.807289	6.18705	115.213	7.06797e-27	6.76725e-26
54670	Atp8b1	1.12734	4.86955	115.152	7.28852e-27	6.97409e-26
433926	Lrrc8b	1.85515	2.70452	115.006	7.8459e-27	7.50276e-26
17385	Mmp11	0.784672	6.17147	114.995	7.88919e-27	7.53949e-26
26415	Mapk13	-2.29976	2.85527	114.899	8.28094e-27	7.90896e-26
226255	Atrnl1	-0.807438	5.73286	114.822	8.60717e-27	8.21545e-26
20535	Slc4a2	-0.742029	6.456	114.646	9.4079e-27	8.97418e-26
67991	Nacc2	-0.727694	6.47114	114.636	9.45623e-27	9.0147e-26
380916	Lrch1	-0.798555	5.90595	114.595	9.65188e-27	9.19553e-26
170744	Tlr8	4.31447	1.74608	114.445	1.04135e-26	9.91501e-26
23908	Hs2st1	-0.747906	6.16806	114.389	1.071e-26	1.0191e-25
12428	Ccna2	-1.22248	4.4755	114.369	1.08171e-26	1.02866e-25
15891	Ibsp	5.76849	1.27971	114.238	1.15542e-26	1.09808e-25
320528	Vps13c	0.7752	5.97844	114.189	1.18463e-26	1.12515e-25
80752	Fam20c	0.886493	5.6821	114.12	1.22685e-26	1.16452e-25
225341	Lims2	1.23635	3.93262	114.054	1.26834e-26	1.20317e-25
63913	Niban1	1.12832	6.35655	114.045	1.27416e-26	1.20794e-25
319945	Flad1	1.00697	4.82015	113.967	1.32488e-26	1.25526e-25
228140	Tnks1bp1	-0.72045	7.62444	113.955	1.33323e-26	1.26239e-25
22154	Tubb5	-0.754562	9.67155	113.873	1.38903e-26	1.31442e-25
12180	Smyd1	1.81061	2.83407	113.805	1.43794e-26	1.35987e-25
228602	Dnaaf9	0.711387	6.71104	113.741	1.48466e-26	1.40319e-25
83965	Enpp5	1.31336	4.1431	113.712	1.50645e-26	1.42291e-25
12512	Cd63	-0.731893	8.67964	113.648	1.55649e-26	1.46928e-25
110460	Acat2	0.831591	5.80724	113.548	1.6369e-26	1.54424e-25
17434	Mocs2	0.833815	5.81343	113.263	1.89015e-26	1.78206e-25
212448	9330159F19Rik	5.28571	0.919549	113.216	1.93477e-26	1.82301e-25
18117	Emc8	0.910703	5.57065	113.198	1.95269e-26	1.83878e-25
21844	Tiam1	-0.986063	4.95302	113.158	1.99251e-26	1.87512e-25
170829	Tram2	-1.12069	5.33937	113.142	2.00899e-26	1.88948e-25
13507	Dsc3	6.34274	2.31527	113.107	2.04436e-26	1.92158e-25
97998	Deptor	0.905741	5.93977	113.077	2.0751e-26	1.94928e-25
97165	Hmgb2	-0.930431	5.32142	113.01	2.14696e-26	2.01555e-25
241732	Tspyl3	-1.48096	3.3948	112.981	2.1786e-26	2.04401e-25
235534	Pxylp1	-1.42803	3.83879	112.937	2.2274e-26	2.08853e-25
68612	Ube2c	-1.19675	4.29578	112.792	2.39633e-26	2.24556e-25
68801	Elovl5	0.826298	7.07037	112.787	2.40259e-26	2.25006e-25
226778	Mark1	-1.30099	4.71817	112.699	2.51111e-26	2.35026e-25
211329	Ncoa7	0.993095	5.19464	112.601	2.63899e-26	2.46845e-25
214804	Syde2	1.2499	4.04457	112.539	2.72267e-26	2.54518e-25
213575	Dync2li1	-0.929749	5.03614	112.511	2.7611e-26	2.57954e-25
56332	Amotl2	-0.796272	9.54023	112.392	2.93195e-26	2.73749e-25
76263	Gstk1	1.0795	4.49377	112.357	2.9838e-26	2.78421e-25
12527	Cd9	-0.703847	7.4278	112.156	3.3025e-26	3.07974e-25
17909	Myo10	-0.756489	8.08392	112.149	3.31451e-26	3.08907e-25
73710	Tubb2b	-0.938162	6.52496	112.142	3.32675e-26	3.0986e-25
80976	Syt13	1.04982	5.7339	111.974	3.6207e-26	3.36832e-25
19267	Ptpre	-2.54891	1.90718	111.975	3.61897e-26	3.36832e-25
27428	Shroom3	-1.19326	4.85948	111.886	3.78481e-26	3.51887e-25
237542	Osbpl8	0.730584	6.2263	111.846	3.86257e-26	3.589e-25
19309	Pygm	1.87492	3.20586	111.684	4.19139e-26	3.89218e-25
319387	Adgrl3	-1.48842	3.76217	111.682	4.19441e-26	3.89265e-25
380728	Kcnh4	4.844	0.834157	111.654	4.25349e-26	3.9451e-25
242570	Raver2	2.6356	1.98179	111.48	4.64504e-26	4.30567e-25
68428	Steap3	-0.689551	6.54605	111.175	5.41799e-26	5.01913e-25
56431	Dstn	0.898883	8.87038	111.115	5.58426e-26	5.17005e-25
26379	Esrra	0.939702	4.94701	111.096	5.6362e-26	5.21501e-25
56434	Tspan3	-0.690431	8.16897	111.035	5.81234e-26	5.37476e-25
100042784	Prdm11	1.16654	4.35695	111.013	5.87947e-26	5.43357e-25
229445	Ctso	-0.910655	5.14067	110.898	6.23103e-26	5.75503e-25
68713	Ifitm1	-4.44413	1.53754	110.888	6.26065e-26	5.77892e-25
93711	Pcdhga3	-1.23591	4.01853	110.703	6.87185e-26	6.33929e-25
78334	Cdk19	-0.836235	5.83201	110.552	7.41557e-26	6.83679e-25
327959	Xaf1	-1.54488	3.87395	110.543	7.45155e-26	6.86585e-25
60599	Trp53inp1	0.674479	6.86773	110.523	7.5271e-26	6.93132e-25
110279	Bcr	-0.727599	6.51762	110.17	8.99292e-26	8.27617e-25
21415	Tcf7l1	0.78656	6.2315	110.152	9.07498e-26	8.3467e-25
211134	Lzts1	3.04499	2.05738	110.062	9.49523e-26	8.72802e-25
13039	Ctsl	-0.760555	8.2549	109.802	1.08265e-25	9.94584e-25
67067	Romo1	1.25369	5.00083	109.733	1.12126e-25	1.02944e-24
319554	Idi1	1.14418	4.35766	109.645	1.17239e-25	1.07573e-24
56516	Rbms2	-0.686554	6.58862	109.583	1.20932e-25	1.10896e-24
50760	Fbxo17	-1.69444	3.42333	109.558	1.22451e-25	1.12222e-24
76527	Il34	1.12183	4.38417	109.539	1.23672e-25	1.13274e-24
70314	Rabep2	-0.857488	5.31941	109.486	1.26996e-25	1.1625e-24
66175	Mustn1	1.5003	3.35559	109.471	1.2795e-25	1.17053e-24
18673	Phb	0.847389	6.54717	109.363	1.35121e-25	1.2354e-24
19303	Pxn	-0.72656	6.3005	109.266	1.41879e-25	1.29642e-24
53886	Cdkl2	1.85842	3.03864	109.004	1.61951e-25	1.47896e-24
13244	Degs1	0.7469	8.07514	108.967	1.65037e-25	1.50625e-24
73046	Glrx5	0.798271	5.80602	108.848	1.75222e-25	1.59825e-24
12306	Anxa2	-0.771214	9.06954	108.654	1.93241e-25	1.76157e-24
380660	Acss3	1.88787	3.95063	108.554	2.03223e-25	1.85147e-24
54401	Ywhab	0.718818	8.54774	108.543	2.0439e-25	1.861e-24
216974	Proca1	2.25037	2.39764	108.323	2.28339e-25	2.07783e-24
18481	Pak3	-0.719809	6.58144	108.176	2.45984e-25	2.23707e-24
68775	Atp6v1c2	-2.0366	2.80114	108.12	2.53015e-25	2.29966e-24
12505	Cd44	-0.820916	6.51018	107.9	2.82715e-25	2.56809e-24
263406	Plekhg3	-0.883337	5.7923	107.584	3.31516e-25	3.00961e-24
71532	Fam217b	1.36798	3.74635	107.533	3.40278e-25	3.08734e-24
69743	Casz1	3.68528	1.48754	107.387	3.66117e-25	3.31982e-24
75974	Dock11	0.937283	5.24142	107.303	3.82009e-25	3.46189e-24
56384	Letm1	0.800213	5.84528	107.265	3.89399e-25	3.52678e-24
225115	Svil	0.743187	7.15495	107.161	4.10451e-25	3.71527e-24
16190	Il4ra	-0.941443	6.79387	106.901	4.68058e-25	4.23422e-24
70561	Txndc16	-0.742012	6.08243	106.895	4.69469e-25	4.2445e-24
239114	Il17d	1.43076	3.79727	106.809	4.90256e-25	4.42983e-24
105689	Mycbp2	-0.790236	8.26362	106.782	4.96878e-25	4.48704e-24
320184	Lrrc58	0.743309	7.63722	106.772	4.99342e-25	4.50665e-24
11475	Acta2	0.775037	10.5745	106.753	5.04303e-25	4.54876e-24
20322	Sord	1.38681	3.73915	106.565	5.54509e-25	4.99869e-24
80909	Castor2	-0.749366	6.16241	106.559	5.5599e-25	5.00911e-24
13038	Ctsk	-0.946972	5.41916	106.465	5.83045e-25	5.24979e-24
11474	Actn3	1.1906	4.51661	106.391	6.05472e-25	5.44854e-24
18476	Pafah1b3	-1.20281	4.378	106.368	6.12268e-25	5.50649e-24
113868	Acaa1a	0.708426	7.37596	106.334	6.22862e-25	5.59849e-24
54139	Irf6	3.71971	1.31507	106.273	6.42573e-25	5.7723e-24
224703	Marchf2	0.819975	6.00807	106.212	6.62616e-25	5.94888e-24
50887	Hmgn5	1.41019	3.52892	106.189	6.70274e-25	6.01413e-24
74048	Vsir	-1.20786	4.98491	105.882	7.82617e-25	7.01806e-24
240641	Kif20b	-1.47308	3.53663	105.782	8.22997e-25	7.37588e-24
15458	Hpx	2.87427	1.43267	105.779	8.24179e-25	7.38217e-24
26395	Map2k1	-0.699696	6.67988	105.672	8.70148e-25	7.78939e-24
67131	Acbd4	1.03778	5.03833	105.337	1.03019e-24	9.21674e-24
18033	Nfkb1	-0.689036	7.05353	105.027	1.20473e-24	1.0772e-23
219135	Mtmr6	-0.675776	6.53333	104.965	1.24307e-24	1.11083e-23
16170	Il16	-1.05709	4.85197	104.964	1.24403e-24	1.11105e-23
18041	Nfs1	0.986383	4.94631	104.825	1.33404e-24	1.19075e-23
242506	Frmd3	2.75709	1.91261	104.68	1.43533e-24	1.28042e-23
76905	Lrg1	2.63442	3.66246	104.596	1.49753e-24	1.33513e-23
216148	Shc2	-1.058	4.41397	104.556	1.52832e-24	1.3618e-23
241525	Ypel4	-1.37999	3.57329	104.531	1.54782e-24	1.37838e-23
59095	Fxyd6	-1.86259	4.65667	104.468	1.59735e-24	1.42166e-23
14387	Gaa	-0.705475	8.35021	104.412	1.64345e-24	1.46185e-23
12070	Bex3	-1.63472	4.78663	104.407	1.64721e-24	1.46435e-23
13433	Dnmt1	-0.73165	6.13187	104.397	1.65592e-24	1.47124e-23
70383	Cox10	1.15838	4.00136	104.361	1.68601e-24	1.49711e-23
68667	Trpm4	-1.18555	3.95853	104.321	1.72071e-24	1.52704e-23
72507	Dzip1l	-1.08938	4.44877	104.309	1.73126e-24	1.53553e-23
18442	P2ry2	2.95029	1.68539	104.307	1.73302e-24	1.5362e-23
14702	Gng2	-2.90883	1.8398	104.179	1.84827e-24	1.63742e-23
277353	Tcfl5	1.69573	3.28303	103.92	2.10681e-24	1.86539e-23
19418	Rasgrf2	5.40063	0.743168	103.916	2.11093e-24	1.86797e-23
98711	Rdh10	0.88314	5.39118	103.884	2.145e-24	1.89702e-23
56294	Ptpn9	-0.681359	6.65061	103.882	2.14772e-24	1.89834e-23
24051	Sgcb	-0.692338	6.27984	103.824	2.21057e-24	1.95278e-23
66461	Ptpmt1	1.20013	4.07243	103.731	2.31732e-24	2.04591e-23
12022	Barx1	-1.68411	3.27853	103.661	2.40116e-24	2.11871e-23
12894	Cpt1a	-0.715053	6.04989	103.414	2.72011e-24	2.39877e-23
97440	B3gnt9	-1.21751	4.71268	103.407	2.72854e-24	2.40482e-23
107373	Fam111a	-1.21721	4.48342	103.315	2.85838e-24	2.51782e-23
27279	Tnfrsf12a	-0.943395	4.81239	103.175	3.06882e-24	2.70165e-23
23859	Dlg2	-2.36132	2.06824	103.049	3.26948e-24	2.87665e-23
24070	Mpdu1	0.891959	5.28733	103.001	3.34928e-24	2.94519e-23
94062	Mrpl3	0.768268	5.84776	102.935	3.46339e-24	3.0438e-23
21856	Timm44	0.771384	5.73089	102.831	3.64945e-24	3.20549e-23
53310	Dlg3	-0.928146	5.14515	102.665	3.96963e-24	3.48473e-23
72007	Fndc3b	-0.752851	8.13514	102.6	4.10222e-24	3.59907e-23
72056	1810055G02Rik	-0.788424	5.68531	102.591	4.12044e-24	3.61301e-23
230279	Tmem268	1.33777	4.14044	102.586	4.1296e-24	3.61897e-23
214968	Sema6d	1.07223	5.16118	102.57	4.16447e-24	3.64746e-23
27999	Fam3c	-0.844809	5.40557	102.473	4.37219e-24	3.82722e-23
228790	Asxl1	-0.738605	6.24463	102.249	4.89577e-24	4.2831e-23
319476	Lrtm1	3.18789	1.78661	102.215	4.98204e-24	4.35611e-23
229534	Pbxip1	-0.687952	7.96796	102.206	5.00447e-24	4.37324e-23
16842	Lef1	1.30985	4.4681	102.102	5.27253e-24	4.60488e-23
20190	Ryr1	1.80554	3.7522	102.058	5.39196e-24	4.70651e-23
320365	Fry	1.2937	3.75088	101.986	5.59275e-24	4.87901e-23
100503924	Fcor	2.82539	2.68057	101.963	5.65773e-24	4.93291e-23
69029	Smdt1	0.803336	5.74118	101.931	5.74931e-24	5.00993e-23
50784	Plpp2	-1.36765	4.03053	101.768	6.24297e-24	5.43703e-23
93699	Pcdhgb1	-1.28571	3.91948	101.689	6.49752e-24	5.65552e-23
12571	Cdk6	-1.7081	2.9455	101.446	7.34516e-24	6.38971e-23
20692	Sparc	-0.743902	11.534	101.389	7.55976e-24	6.57268e-23
244548	Elmod2	0.843241	5.53231	101.347	7.71962e-24	6.70722e-23
56085	Ubqln1	0.668354	7.57155	101.346	7.7232e-24	6.70722e-23
240084	Cchcr1	-1.05517	4.457	101.168	8.44969e-24	7.33401e-23
14371	Fzd9	1.07064	5.71473	101.166	8.45853e-24	7.33755e-23
27223	Trp53bp1	-0.76089	5.97806	101.119	8.66265e-24	7.51039e-23
16412	Itgb1	-0.71107	10.1577	101.079	8.84059e-24	7.66036e-23
70967	Eva1c	1.64881	3.17584	101.073	8.86438e-24	7.67665e-23
19714	Rev3l	0.674296	6.9644	101.031	9.05657e-24	7.83869e-23
233103	Garre1	-0.768308	5.81826	101.011	9.14575e-24	7.91143e-23
108075	Ltbp4	0.719582	7.18723	100.911	9.62032e-24	8.31729e-23
70257	Atp5mpl	0.942029	5.44275	100.873	9.80783e-24	8.47464e-23
68468	Ly6g6c	6.95975	0.326804	100.808	1.01353e-23	8.75269e-23
320558	Sycp2	3.40451	1.05509	100.805	1.0148e-23	8.75877e-23
18760	Prkd1	-0.743241	6.21334	100.79	1.02262e-23	8.82134e-23
23962	Oasl2	-3.18099	2.96775	100.656	1.09441e-23	9.43531e-23
13202	Ddt	1.9044	2.55	100.523	1.17001e-23	1.00815e-22
52570	Ccdc69	3.15058	1.38954	100.498	1.18543e-23	1.02086e-22
268783	Mtmr12	-0.790423	5.70495	100.452	1.2129e-23	1.04393e-22
52915	Zmiz2	0.693925	6.15208	100.408	1.24025e-23	1.06688e-22
72129	Pex13	0.922389	5.9232	100.18	1.39139e-23	1.19622e-22
18933	Prrx1	0.772769	9.55294	100.013	1.51417e-23	1.30106e-22
104027	Synpo	-0.868134	9.48675	99.9885	1.53287e-23	1.31639e-22
66629	Golph3	-0.646689	7.67032	99.9226	1.58471e-23	1.36015e-22
52666	Arhgef25	-0.69141	7.22689	99.7222	1.75341e-23	1.5041e-22
73173	Pcdh18	-0.773938	6.05033	99.7154	1.75945e-23	1.50845e-22
18301	Fxyd5	-2.28579	2.35477	99.5835	1.88061e-23	1.61143e-22
12795	Plk3	-2.06938	2.79184	99.5366	1.92572e-23	1.64916e-22
56543	Kcnd3	3.04553	1.99575	99.5104	1.95133e-23	1.67017e-22
26377	Dapp1	-1.65356	3.03519	99.3973	2.06602e-23	1.76735e-22
70984	4931406C07Rik	0.729396	5.9346	99.2821	2.18976e-23	1.87217e-22
233115	Dpy19l3	-0.846601	5.19886	99.1805	2.30502e-23	1.96962e-22
100041194	Ahnak2	-0.952906	6.24739	99.1377	2.35544e-23	2.01159e-22
14431	Gamt	1.34305	3.69362	99.0874	2.41599e-23	2.06215e-22
106393	Srl	1.2649	4.62057	99.0825	2.42198e-23	2.06612e-22
13846	Ephb4	-0.693143	6.35972	98.9342	2.61027e-23	2.22552e-22
20512	Slc1a3	1.42401	6.26544	98.8941	2.66378e-23	2.26988e-22
69089	Oxa1l	0.744102	5.88923	98.8683	2.69864e-23	2.29831e-22
19731	Rgl1	-0.721786	6.53573	98.84	2.73753e-23	2.33015e-22
19348	Kif20a	-1.22592	4.39632	98.8372	2.7414e-23	2.33216e-22
15273	Hivep2	0.728696	6.02752	98.7711	2.83435e-23	2.4099e-22
233406	Prc1	-1.10306	5.28141	98.6952	2.94509e-23	2.50268e-22
215632	Psd4	0.955564	4.83313	98.6846	2.96098e-23	2.51479e-22
66616	Snx9	-0.681194	6.60016	98.6383	3.03093e-23	2.57279e-22
18792	Plau	-0.770356	5.85545	98.5398	3.18555e-23	2.70254e-22
216831	Arhgap44	-1.16642	3.88173	98.5301	3.2012e-23	2.71433e-22
12363	Casp4	-2.43564	2.66458	98.4994	3.25118e-23	2.7552e-22
97064	Wwtr1	-0.652023	6.88454	98.4558	3.32357e-23	2.81499e-22
13875	Erf	-0.899081	5.2286	98.4495	3.33422e-23	2.82246e-22
71461	Ptk7	-0.727475	6.27984	98.3371	3.52891e-23	2.98563e-22
76108	Rap2a	-0.713642	6.53555	97.9066	4.38587e-23	3.70862e-22
74202	Fblim1	-0.793259	5.62553	97.8293	4.56053e-23	3.8542e-22
57437	Golga7	-0.681301	6.7531	97.8162	4.59087e-23	3.87771e-22
319236	Trim12c	-0.857526	5.07278	97.7495	4.74792e-23	4.00817e-22
52187	Rragd	2.54347	1.76296	97.675	4.93018e-23	4.15975e-22
64706	Scube1	1.774	3.15218	97.6718	4.93801e-23	4.16408e-22
11799	Birc5	-1.22822	3.76376	97.6093	5.09632e-23	4.29523e-22
108897	Aif1l	1.19909	4.60339	97.5339	5.29413e-23	4.45951e-22
75329	Atf7ip2	4.28404	0.757501	97.3756	5.73494e-23	4.82819e-22
16410	Itgav	-0.696864	7.45848	97.3354	5.85233e-23	4.92433e-22
230125	Slc25a51	0.635235	7.14159	97.2892	5.99059e-23	5.03792e-22
66815	Mcub	-1.73658	2.74409	97.2216	6.19882e-23	5.21019e-22
64655	Mrps22	1.10116	4.30827	97.1919	6.29247e-23	5.28601e-22
12298	Cacnb4	2.2917	2.11057	97.1862	6.31045e-23	5.29824e-22
231147	Sh3tc1	3.62778	1.19457	97.0515	6.7549e-23	5.66831e-22
21938	Tnfrsf1b	-1.01361	4.40158	96.9308	7.17932e-23	6.02118e-22
216820	Dhrs7b	1.09567	4.71729	96.9081	7.26195e-23	6.08716e-22
64297	Gprc5b	0.698224	6.20596	96.8783	7.37214e-23	6.17617e-22
70099	Smc4	-0.672286	6.92582	96.859	7.44443e-23	6.23335e-22
407785	Ndufs6	0.98017	4.59677	96.8212	7.58796e-23	6.35007e-22
52815	Ldhd	1.81425	2.73231	96.7555	7.84386e-23	6.56067e-22
208795	Tmem63a	-0.818083	5.75319	96.5396	8.74784e-23	7.31279e-22
17308	Mgat1	-0.669882	6.53574	96.53	8.79016e-23	7.34419e-22
20250	Scd2	0.740858	8.95118	96.5036	8.90798e-23	7.4386e-22
105675	Ppif	1.02022	4.34345	96.4146	9.31792e-23	7.7767e-22
17258	Mef2a	0.732155	6.64286	96.4102	9.33834e-23	7.78953e-22
19220	Ptgfr	1.10044	5.68667	96.3711	9.52482e-23	7.94079e-22
228482	Arhgap11a	-1.1839	3.93842	96.3518	9.61826e-23	8.01435e-22
17025	Alad	0.986545	4.47131	96.3336	9.70695e-23	8.08388e-22
14635	Galk1	-0.739866	5.61755	96.3031	9.85751e-23	8.20483e-22
67264	Ndufb8	0.987249	5.18947	96.2568	1.00906e-22	8.39433e-22
243300	Nyap1	-1.94206	2.90659	96.2482	1.01346e-22	8.4264e-22
234076	Tmco3	-0.761643	5.69047	96.1208	1.08084e-22	8.98177e-22
19687	Rfc1	0.66221	6.42491	96.0624	1.11318e-22	9.24551e-22
17937	Nab2	-1.022	5.73788	96.0085	1.14389e-22	9.49543e-22
104885	Tmem179	7.29837	3.53958	95.9821	1.15926e-22	9.61785e-22
77569	Limch1	-0.932194	5.80233	95.8893	1.2149e-22	1.00741e-21
70375	Ica1l	3.27657	1.15684	95.7783	1.28497e-22	1.06494e-21
93885	Pcdhb14	-1.33744	3.39717	95.6652	1.36051e-22	1.12694e-21
106878	Smim3	-1.22897	3.91175	95.6534	1.36862e-22	1.13304e-21
75605	Kdm5b	-0.665733	7.0598	95.629	1.38564e-22	1.1464e-21
11502	Adam9	-0.702402	7.74962	95.6281	1.38624e-22	1.1464e-21
11303	Abca1	0.660542	8.02817	95.5625	1.43297e-22	1.18441e-21
68493	Ndufaf4	1.10661	4.47502	95.4914	1.48531e-22	1.22702e-21
235674	Acaa1b	3.1549	1.93713	95.4145	1.54415e-22	1.27494e-21
269823	Pon3	-0.938282	4.66884	95.3858	1.56675e-22	1.2929e-21
229357	Gpr149	5.25353	0.83071	95.3639	1.58419e-22	1.3066e-21
208628	Kntc1	-1.53712	3.41679	95.284	1.64942e-22	1.35967e-21
278279	Tmtc2	1.84766	3.0908	95.2728	1.65875e-22	1.36663e-21
69226	Snx24	-1.33844	3.43758	95.1885	1.73096e-22	1.42536e-21
13345	Twist2	2.01557	2.75943	95.126	1.78646e-22	1.47028e-21
20955	Vamp7	-1.01101	4.72182	95.0214	1.88335e-22	1.54919e-21
80904	Dtx3	-0.796589	6.67917	94.8754	2.02753e-22	1.6669e-21
27060	Tcirg1	-0.913551	5.19277	94.7292	2.18297e-22	1.79373e-21
67703	Kirrel3	-2.15872	4.349	94.6697	2.2496e-22	1.8475e-21
104681	Slc16a6	2.31621	1.98843	94.664	2.2561e-22	1.85185e-21
20340	Glg1	-0.657305	8.44745	94.6059	2.32324e-22	1.90595e-21
224454	Zdhhc14	1.98943	2.47098	94.598	2.3325e-22	1.91253e-21
27049	Etv3	0.806491	5.33439	94.5912	2.34059e-22	1.91814e-21
11722	Amy1	1.85342	2.45803	94.5821	2.35136e-22	1.92594e-21
16475	Ajuba	-0.703564	6.27477	94.4391	2.52753e-22	2.06914e-21
56046	Uqcc1	0.783787	5.24851	94.4152	2.55817e-22	2.09311e-21
278304	Zfp385c	3.09691	1.75731	94.3098	2.69808e-22	2.20641e-21
434215	Lrrc32	0.71259	7.24183	94.2939	2.7199e-22	2.22308e-21
26897	Acot1	-0.937265	5.11573	94.2565	2.77173e-22	2.26424e-21
74185	Gbe1	0.949758	4.76022	94.2281	2.81181e-22	2.29577e-21
228564	Frmd5	-1.03348	5.20311	94.2164	2.8285e-22	2.30817e-21
66948	Acad8	0.801252	5.25099	94.166	2.90149e-22	2.36648e-21
16971	Lrp1	-0.746787	10.667	94.0653	3.05284e-22	2.4886e-21
21817	Tgm2	0.974517	6.92341	94.0249	3.11587e-22	2.53864e-21
209683	Ttc28	0.718379	7.38089	94.0217	3.12082e-22	2.54134e-21
68732	Carmil1	-0.917144	4.71117	93.9806	3.18629e-22	2.59328e-21
16506	Kcnd1	-1.64097	3.21882	93.9037	3.31251e-22	2.69458e-21
269608	Plekhg5	-0.778207	5.93866	93.8974	3.32307e-22	2.70175e-21
22151	Tubb2a	-1.0109	7.84597	93.833	3.43303e-22	2.78967e-21
75965	Zdhhc20	-0.644413	6.56156	93.8046	3.4826e-22	2.82847e-21
319660	Agmo	1.37458	3.24415	93.7045	3.66334e-22	2.97369e-21
12866	Cox7a2	1.01038	6.39809	93.6409	3.78297e-22	3.06918e-21
319518	Pdpr	0.802308	5.6464	93.6386	3.7872e-22	3.071e-21
66695	Aspn	0.732518	9.95797	93.5842	3.89284e-22	3.155e-21
16800	Arhgef2	-0.645414	6.49608	93.3371	4.41044e-22	3.57262e-21
14991	H2-M3	-2.50144	1.6307	93.258	4.59028e-22	3.71634e-21
71911	Bdh1	1.40258	3.36268	93.1655	4.80987e-22	3.89208e-21
16527	Kcnk3	6.67187	3.22983	93.0824	5.01627e-22	4.05697e-21
20361	Sema7a	-1.74408	2.92943	93.0778	5.02777e-22	4.06414e-21
107350	AW112010	8.91456	-0.0953359	93.0723	5.04189e-22	4.07342e-21
327655	Ppip5k1	0.903815	4.79541	92.9644	5.32434e-22	4.29935e-21
71774	Shroom1	-1.51262	3.38315	92.9221	5.43934e-22	4.38992e-21
21983	Tpbg	-0.858591	5.4045	92.6938	6.10436e-22	4.92406e-21
232430	Crebl2	-0.866742	4.83401	92.6172	6.34532e-22	5.11575e-21
329251	Ppp1r12b	0.685251	6.70582	92.5714	6.49393e-22	5.23282e-21
170770	Bbc3	1.25778	4.20132	92.5403	6.5967e-22	5.31286e-21
74480	Samd4	-0.745121	6.50389	92.4685	6.84043e-22	5.50627e-21
19411	Rarg	-0.953721	6.57933	92.4418	6.93343e-22	5.57822e-21
67088	Cand2	-0.841158	4.93241	92.4155	7.02602e-22	5.64977e-21
60510	Syt9	5.81428	1.24161	92.3501	7.2624e-22	5.83681e-21
13709	Elf1	-0.679722	6.26312	92.3387	7.30411e-22	5.86726e-21
140493	Kcnn3	2.34608	2.26448	92.3324	7.32757e-22	5.88304e-21
72475	Ssbp3	-0.660643	6.96334	92.3104	7.40947e-22	5.94571e-21
67330	1700047M11Rik	5.37735	0.454863	92.2846	7.50648e-22	6.02042e-21
72434	Lypd3	8.96333	-0.0300104	92.2566	7.61366e-22	6.1032e-21
106529	Tecr	0.718991	7.60589	92.254	7.6236e-22	6.108e-21
20682	Sox9	-0.938561	8.24668	92.1377	8.08494e-22	6.47425e-21
50934	Slc7a8	1.70031	3.20457	92.0555	8.42794e-22	6.74541e-21
26568	Slc27a3	-1.03607	4.82376	91.7944	9.6164e-22	7.69262e-21
21950	Tnfsf9	-2.88529	1.65225	91.7462	9.8536e-22	7.87828e-21
21384	Tbx15	-0.656787	6.50903	91.67	1.02404e-21	8.18332e-21
407790	Ndufa4l2	-3.57712	6.54384	91.6536	1.03258e-21	8.24726e-21
242484	D630039A03Rik	3.13822	1.37289	91.6262	1.04699e-21	8.35801e-21
59092	Pcbp4	-0.7631	5.96021	91.6005	1.06068e-21	8.46293e-21
16371	Irx1	-0.830522	5.88416	91.586	1.06848e-21	8.52077e-21
69046	Isca1	0.659107	6.44673	91.5145	1.10776e-21	8.82947e-21
57170	Dolpp1	0.928867	4.53994	91.4912	1.12088e-21	8.92941e-21
56190	Rbm38	2.28761	2.30289	91.4749	1.13018e-21	8.99883e-21
11602	Angpt4	1.67216	6.26195	91.4465	1.14651e-21	9.1241e-21
16565	Kif21b	-1.45126	3.3722	91.409	1.16844e-21	9.29383e-21
60441	Mrpl38	0.891425	5.00277	91.3894	1.18005e-21	9.38136e-21
58859	Efemp2	-0.684184	8.6469	91.3528	1.2021e-21	9.55175e-21
212442	Lactb2	0.834211	5.57437	91.3112	1.22766e-21	9.74984e-21
26440	Psma1	0.691049	6.8542	91.2421	1.27127e-21	1.0091e-20
545539	Gm15417	1.89716	2.38267	91.2109	1.29146e-21	1.02459e-20
17076	Ly75	-1.20152	3.69905	91.2081	1.29328e-21	1.02551e-20
67636	Etfrf1	0.958014	5.17527	91.0954	1.36912e-21	1.08509e-20
26757	Dpysl4	0.955948	5.07928	91.0517	1.39967e-21	1.10873e-20
73144	Mir100hg	-0.837034	7.94489	91.0317	1.41388e-21	1.11941e-20
74335	Xrcc3	1.18591	4.24646	90.8344	1.56211e-21	1.23614e-20
73998	Herc3	1.55245	3.09427	90.7724	1.61189e-21	1.27487e-20
245049	Myrip	5.50937	0.632908	90.7261	1.65004e-21	1.30437e-20
12121	Bicd1	2.17001	2.20604	90.6039	1.75517e-21	1.38677e-20
20266	Scn1b	-0.80859	5.16611	90.5505	1.80314e-21	1.42395e-20
17387	Mmp14	-0.699518	9.28766	90.5268	1.82492e-21	1.44041e-20
107585	Dio3	-0.906031	6.15063	90.323	2.02284e-21	1.59581e-20
13046	Celf1	0.610654	7.2099	90.3128	2.03338e-21	1.6033e-20
407800	Ecm2	1.02802	4.88729	90.2526	2.09618e-21	1.65197e-20
16906	Lmnb1	-0.941849	4.78114	90.245	2.10419e-21	1.65744e-20
11647	Alpl	1.61519	3.12089	90.1809	2.17352e-21	1.71118e-20
74159	Acbd5	0.648779	6.25062	90.1715	2.18387e-21	1.71845e-20
234582	Ccdc102a	-0.803153	5.39682	90.0822	2.2847e-21	1.79687e-20
73078	Pmpcb	0.655377	6.12532	90.0771	2.29054e-21	1.80054e-20
16398	Itga2	2.56437	1.82675	89.9573	2.43357e-21	1.912e-20
13992	Khdrbs3	1.0698	4.13429	89.9271	2.47103e-21	1.94044e-20
226438	Igfn1	2.18365	2.38505	89.9129	2.48879e-21	1.9534e-20
22038	Plscr1	-1.95611	3.83804	89.8393	2.58308e-21	2.02637e-20
99542	AI115009	-2.36911	1.91319	89.8317	2.59301e-21	2.03312e-20
15251	Hif1a	-0.650968	7.66407	89.8095	2.62227e-21	2.05502e-20
17931	Ppp1r12a	0.680319	6.93302	89.6353	2.86367e-21	2.24306e-20
12153	Bmp1	-0.663427	7.72869	89.574	2.95387e-21	2.31254e-20
67016	Tbc1d2b	0.628693	7.44784	89.5655	2.96658e-21	2.32131e-20
67207	Lsm1	0.938956	4.89386	89.5351	3.01252e-21	2.35606e-20
101502	Hsd3b7	0.857251	5.11668	89.4169	3.198e-21	2.49986e-20
68316	Apoo	1.05967	4.10102	89.3479	3.31144e-21	2.58722e-20
18160	Npr1	2.18039	2.31645	89.2972	3.39733e-21	2.65298e-20
67792	Rgs8	2.90793	1.86382	89.2785	3.42975e-21	2.67694e-20
66988	Lap3	0.630136	6.37988	89.1606	3.64019e-21	2.83976e-20
239188	Enox1	1.57914	2.75588	89.0348	3.87936e-21	3.02481e-20
240752	Pik3c2b	1.61443	3.09158	89.0138	3.92071e-21	3.0555e-20
12877	Cpeb1	1.08994	4.27845	88.9493	4.05058e-21	3.15511e-20
232943	Klc3	-2.52654	1.85186	88.9282	4.09405e-21	3.18736e-20
78523	Mrpl9	0.795091	5.3559	88.8379	4.2852e-21	3.3345e-20
218885	Oxnad1	1.45884	3.81371	88.8329	4.2962e-21	3.34137e-20
229517	Slc25a44	0.777483	5.55252	88.8087	4.34908e-21	3.38079e-20
53605	Nap1l1	-0.693865	7.98965	88.7679	4.43951e-21	3.44934e-20
11610	Agtrap	-0.812739	5.29163	88.7379	4.50736e-21	3.5003e-20
69956	Ptcd3	0.779457	5.73153	88.6404	4.73524e-21	3.67542e-20
71709	Syde1	-0.720567	6.2504	88.615	4.79648e-21	3.72107e-20
66379	Cox14	0.838101	5.8563	88.5953	4.8444e-21	3.75636e-20
50529	Mrps7	0.78072	5.19316	88.3976	5.35359e-21	4.1491e-20
231050	Galnt11	-0.758123	5.59611	88.2209	5.85389e-21	4.53456e-20
100169	Phactr4	-0.93198	5.00078	88.1924	5.93886e-21	4.59806e-20
227697	Dolk	0.886244	5.11109	88.1382	6.10389e-21	4.72347e-20
78908	Igsf3	-1.15145	6.65255	88.1249	6.14494e-21	4.75285e-20
66383	Iscu	0.663087	6.07728	88.1013	6.21853e-21	4.80735e-20
207521	Dtx4	1.10356	4.32952	88.0605	6.34823e-21	4.90516e-20
69386	H4c8	2.8471	1.34982	87.9874	6.58732e-21	5.08735e-20
12361	Cask	-0.672645	6.34383	87.9655	6.66077e-21	5.1415e-20
72313	Fryl	0.653991	6.92449	87.8575	7.03453e-21	5.42729e-20
16949	Loxl1	-0.65602	8.31352	87.8333	7.12093e-21	5.4912e-20
20334	Sec23a	-0.619408	7.03614	87.7328	7.49201e-21	5.77447e-20
14235	Foxm1	-1.37943	4.12582	87.6552	7.79207e-21	6.00274e-20
15216	Hfe	1.08325	4.55691	87.6399	7.85245e-21	6.04623e-20
17709	COX2	1.27386	4.25741	87.6365	7.86596e-21	6.05358e-20
216877	Dhx33	0.640974	6.12445	87.6355	7.86986e-21	6.05358e-20
72823	Pard3b	0.92945	4.65411	87.4848	8.49295e-21	6.52962e-20
319622	Itpripl2	-0.633962	7.05929	87.445	8.66553e-21	6.65898e-20
242202	Pde5a	1.18953	4.03758	87.4304	8.72975e-21	6.70499e-20
70361	Lman1	-0.608683	7.28402	87.4266	8.74646e-21	6.71448e-20
66048	Emc6	0.976558	5.33746	87.385	8.93235e-21	6.85377e-20
15116	Has1	-3.92059	0.556614	87.3143	9.25779e-21	7.09994e-20
17710	COX3	1.17737	4.20197	87.2834	9.40326e-21	7.20792e-20
105245	Txndc5	-0.669617	8.40029	87.2819	9.41041e-21	7.20982e-20
433940	Fam222a	2.23002	2.39332	87.2649	9.49198e-21	7.26509e-20
26410	Map3k8	-1.68521	2.80425	87.265	9.49135e-21	7.26509e-20
27528	Nrep	0.97684	5.14287	87.2097	9.76061e-21	7.46699e-20
11450	Adipoq	10.2244	9.14853	87.2016	9.80065e-21	7.4939e-20
207182	Ggt7	-1.18014	4.0182	87.1575	1.00212e-20	7.65876e-20
60533	Cd274	2.2627	1.97554	87.1555	1.00318e-20	7.66303e-20
71755	Dhdh	1.20753	3.9494	87.1242	1.01913e-20	7.78105e-20
53321	Cntnap1	1.12331	4.72651	87.123	1.0198e-20	7.78226e-20
66586	Crls1	0.832817	5.34827	87.0996	1.03189e-20	7.87066e-20
17968	Ncam2	-1.96235	2.26734	87.0277	1.0701e-20	8.15806e-20
30806	Adamts8	6.79899	0.0438381	86.9916	1.08986e-20	8.30457e-20
70397	Tmem70	0.838514	5.7041	86.9452	1.11569e-20	8.49723e-20
69354	Slc38a4	-2.23752	1.86594	86.7801	1.21286e-20	9.23268e-20
21924	Tnnc1	1.05775	4.51873	86.7285	1.24487e-20	9.47169e-20
18029	Nfic	-0.646899	7.34154	86.7059	1.25923e-20	9.57623e-20
70661	Sik3	0.611791	6.68383	86.481	1.41083e-20	1.07238e-19
212679	Mars2	1.10012	4.42537	86.4559	1.42889e-20	1.08558e-19
380713	Scarf1	2.55033	1.75622	86.401	1.46907e-20	1.11556e-19
16177	Il1r1	-0.741069	7.09906	86.3858	1.48041e-20	1.12361e-19
114774	Pawr	0.654152	6.47436	86.3601	1.49981e-20	1.13778e-19
56878	Rbms1	-0.670625	7.7079	86.2892	1.55458e-20	1.17874e-19
56417	Adar	-0.897559	5.78327	86.2786	1.56292e-20	1.18449e-19
11957	Atp5j	0.808091	6.70109	86.2278	1.60358e-20	1.2147e-19
100616095	Snhg18	-0.976881	4.52164	86.2144	1.61449e-20	1.22237e-19
18162	Npr3	-1.17603	6.18834	86.1707	1.65057e-20	1.24907e-19
71998	Slc25a35	1.41134	3.44426	86.1659	1.65455e-20	1.25147e-19
108000	Cenpf	-1.27943	4.40366	86.1554	1.6634e-20	1.25754e-19
19347	Dennd5a	-0.644754	7.49724	86.1489	1.66882e-20	1.26102e-19
60527	Fads3	0.615565	7.80834	86.0768	1.73085e-20	1.30725e-19
73712	Dmkn	5.98402	2.3999	86.0323	1.77019e-20	1.33631e-19
66861	Dnajc10	-0.59515	7.25921	86.0123	1.78823e-20	1.34927e-19
230793	Ahdc1	-0.611395	6.39503	85.9084	1.88462e-20	1.4213e-19
668880	Stard9	-1.06556	4.31847	85.834	1.95691e-20	1.4751e-19
117606	Boc	-0.686018	7.50376	85.7946	1.9963e-20	1.50405e-19
57815	Spata5	0.994645	4.28248	85.7812	2.00991e-20	1.51357e-19
333654	Ppp1r13l	-1.22691	3.60237	85.7716	2.01964e-20	1.52015e-19
12291	Cacna1g	-1.05152	4.99434	85.5605	2.24724e-20	1.69064e-19
17329	Cxcl9	4.12347	0.63303	85.5173	2.29688e-20	1.72714e-19
268932	Caskin1	1.80955	2.44065	85.4487	2.3779e-20	1.78719e-19
622434	Arhgef26	2.0558	2.42678	85.4283	2.4026e-20	1.80488e-19
118451	Mrps2	0.784306	5.06778	85.2446	2.63647e-20	1.9796e-19
260409	Cdc42ep3	0.617303	7.33288	85.2429	2.63873e-20	1.98033e-19
99031	Osbpl6	1.21349	3.61428	85.2258	2.66168e-20	1.99658e-19
17252	Rdh11	0.675289	5.73957	85.1926	2.7067e-20	2.02937e-19
13196	Asap1	-0.71351	7.23743	85.1726	2.73427e-20	2.04904e-19
11928	Atp1a1	-0.627437	8.41973	85.1262	2.7991e-20	2.0966e-19
72190	2510009E07Rik	0.6395	5.97716	85.123	2.80372e-20	2.09904e-19
53375	Mtx2	0.80789	5.347	85.0419	2.92113e-20	2.18588e-19
[truncated: 13,416 more rows]

## Sheet: 2c_20m
Entrez ID	Gene_symbol	logFC	logCPM	LR	P.Value	FDR
11450	Adipoq	17.3386	8.27048	4123.6	0	4.05497e-306
11556	Adrb3	13.0772	5.62662	2502.33	0	4.05497e-306
11537	Cfd	12.8983	7.58237	3624.42	0	4.05497e-306
14311	Cidec	12.0037	4.5645	1503.6	0	4.05497e-306
23993	Klk7	10.7394	4.91111	1655.78	0	4.05497e-306
269275	Acvr1c	10.5886	5.25763	2084.14	0	4.05497e-306
16666	Krt16	10.5416	4.71306	1544.24	0	4.05497e-306
16687	Krt6a	10.2222	6.27575	2502.91	0	4.05497e-306
103968	Plin1	9.9248	7.73873	1530.72	0	4.05497e-306
110308	Krt5	9.09544	6.39237	2838.56	0	4.05497e-306
16664	Krt14	8.3097	6.29638	2690.3	0	4.05497e-306
17880	Myh11	7.15358	8.34055	1991.11	0	4.05497e-306
18606	Enpp2	6.27775	6.46371	1730.41	0	4.05497e-306
103172	Chchd10	5.56839	5.80748	1933.12	0	4.05497e-306
13107	Cyp2f2	4.7563	6.77669	1565.46	0	4.05497e-306
230099	Car9	-4.69705	6.88162	1412.42	0	4.05497e-306
14081	Acsl1	5.18712	8.9045	1396.66	1.11709e-305	1.01294e-302
19016	Pparg	3.64303	6.72077	1333.53	5.8512e-292	5.0109e-289
13106	Cyp2e1	13.2763	4.21682	1230.24	1.63426e-269	1.3259e-266
84004	Mcam	4.89176	6.78048	1164.85	2.6593e-255	2.04966e-252
58805	Mlxipl	7.76729	4.12852	1115.63	1.32185e-244	9.70299e-242
12654	Chil1	-3.69123	7.18961	1094.3	5.71937e-240	4.00746e-237
16667	Krt17	8.61724	6.44157	1090.88	3.17706e-239	2.12932e-236
73712	Dmkn	8.97457	4.03105	1052.6	6.62022e-231	4.25211e-228
16890	Lipe	4.63621	6.45502	1039.77	4.06597e-228	2.50708e-225
19662	Rbp4	3.61269	6.15621	1028.7	1.03879e-225	6.15885e-223
244723	Olfm2	5.74007	4.58848	1008.05	3.19501e-221	1.82411e-218
19416	Rasd1	7.32429	3.92811	1001.33	9.21074e-220	5.07084e-217
223917	Krt79	12.8743	3.82827	999.114	2.79856e-219	1.48758e-216
246747	Adig	10.4857	3.80433	978.564	8.20025e-215	4.21356e-212
11606	Agt	4.79181	5.28804	964.214	1.07887e-211	5.36478e-209
215653	Rassf2	4.07468	6.63825	958.892	1.54836e-210	7.45876e-208
494504	Apcdd1	4.9489	5.46284	951.926	5.05931e-209	2.36331e-206
76969	Chst1	3.42806	5.286	947.708	4.17804e-208	1.89425e-205
21857	Timp1	-3.8137	7.03939	946.601	7.2729e-208	3.20319e-205
21808	Tgfb2	3.34825	7.77922	933.784	4.44409e-205	1.90293e-202
70335	Reep6	5.1192	4.39962	920.444	3.52895e-202	1.47024e-199
14555	Gpd1	7.57002	6.47374	908.622	1.31099e-199	5.31814e-197
16948	Lox	-3.09594	10.5593	903.653	1.5766e-198	6.23161e-196
16826	Ldb2	4.4756	4.72348	844.498	1.14194e-185	4.40073e-183
17700	Mstn	7.08811	4.09155	842.768	2.71473e-185	1.02067e-182
53867	Col5a3	2.9924	6.27784	816.82	1.18904e-179	4.36406e-177
12819	Col15a1	5.03653	8.53047	811.883	1.40763e-178	5.0462e-176
20568	Slpi	-2.77124	6.64394	810.518	2.78751e-178	9.7658e-176
16164	Il13ra1	-3.24916	5.86271	808.386	8.10779e-178	2.77737e-175
19144	Klk6	12.5026	3.45599	805.964	2.72471e-177	9.13073e-175
240753	Plekha6	4.81624	5.46343	803.085	1.1515e-176	3.77667e-174
56222	Cited4	8.9621	3.6176	796.742	2.75749e-175	8.85556e-173
213945	Col28a1	-3.10804	6.3073	785.746	6.77892e-173	2.13259e-170
53896	Slc7a10	12.374	3.3226	775.792	9.89472e-171	3.05054e-168
23966	Tenm4	4.71354	6.66394	772.185	6.02094e-170	1.81986e-167
56078	Car5b	3.1807	6.55101	756.44	1.59654e-166	4.73281e-164
58200	Ppp1r1a	10.0322	3.35193	755.416	2.66487e-166	7.75074e-164
19288	Ptx3	-2.92483	8.4168	742.143	2.05053e-163	5.8535e-161
68027	Tmem178	3.2936	5.17436	729.902	9.40975e-161	2.6373e-158
69540	Klk10	5.56644	4.00744	717.471	4.74937e-158	1.29913e-155
17879	Myh1	2.45591	9.12159	717.448	4.8038e-158	1.29913e-155
241556	Tspan18	4.42821	5.93775	694.399	4.93842e-153	1.31251e-150
18212	Ntrk2	2.89877	5.70304	681.686	2.87234e-150	7.50459e-148
223272	Itgbl1	-2.70674	5.70563	674.967	8.30579e-149	2.1339e-146
14732	Gpam	2.69681	6.76752	670.564	7.5309e-148	1.90309e-145
109620	Dsp	6.69742	4.77018	667.573	3.36877e-147	8.37575e-145
20528	Slc2a4	5.13906	4.26151	665.347	1.02658e-146	2.51186e-144
13512	Dsg3	9.83665	3.16983	657.385	5.53365e-145	1.33283e-142
17884	Myh4	4.08093	6.25654	654.419	2.44323e-144	5.7942e-142
77018	Col25a1	2.63665	5.58772	652.835	5.40117e-144	1.2615e-141
11468	Actg2	3.80891	6.88698	612.532	3.14801e-135	7.24276e-133
17929	Myom1	2.47076	5.97566	604.601	1.67166e-133	3.7895e-131
319476	Lrtm1	3.49051	4.49595	601.805	6.78019e-133	1.51473e-130
19116	Prlr	3.18074	4.63992	597.222	6.73002e-132	1.48205e-129
12830	Col4a5	-2.27664	6.95806	591.91	9.62784e-131	2.09033e-128
78754	Galnt15	3.10461	5.02773	590.213	2.25179e-130	4.82103e-128
83379	Klb	8.37469	3.06844	589.894	2.64177e-130	5.57849e-128
12372	Casq1	2.18141	6.89287	589.531	3.16965e-130	6.60272e-128
319196	Ankef1	5.25845	3.44457	586.155	1.71872e-129	3.53255e-127
57435	Plin4	3.1393	6.38677	584.918	3.19335e-129	6.47703e-127
240725	Sulf1	-2.15422	7.27515	584.2	4.57656e-129	9.16205e-127
12350	Car3	9.41454	9.10317	583.315	7.12815e-129	1.40872e-126
81877	Tnxb	3.44428	5.87846	581.718	1.5859e-128	3.09452e-126
21802	Tgfa	3.7578	4.81991	579.076	5.95887e-128	1.1482e-125
235130	Adamts15	2.63655	7.82547	575.8	3.07388e-127	5.84987e-125
110595	Timp4	4.05385	3.75363	569.216	8.31349e-126	1.56284e-123
53881	Slc5a3	2.34694	7.60623	557.581	2.82395e-123	5.24472e-121
14461	Gata2	2.14808	6.30684	547.854	3.68747e-121	6.76695e-119
68588	Cthrc1	-3.74201	3.9747	538.395	4.21309e-119	7.64057e-117
627626	Ptchd4	2.98814	4.91933	537.166	7.79646e-119	1.39747e-116
12835	Col6a3	2.56386	10.2961	536.04	1.37064e-118	2.42856e-116
22095	Tshr	8.85545	3.06869	534.189	3.46361e-118	6.06722e-116
226518	Nmnat2	3.57908	3.95824	533.235	5.58581e-118	9.67474e-116
18787	Serpine1	-3.16756	8.91536	529.769	3.1704e-117	5.4302e-115
14115	Fbln2	-2.41015	10.8963	524.804	3.81302e-116	6.45909e-114
66972	Slc25a23	2.46739	5.2723	522.169	1.42745e-115	2.39176e-113
18131	Notch3	2.29035	6.18599	512.612	1.71401e-113	2.84101e-111
13617	Ednra	2.55587	4.89487	512.566	1.75317e-113	2.87502e-111
195733	Grhl1	5.84196	3.27386	507.893	1.8227e-112	2.95758e-110
277414	Trp53i11	2.75367	5.37035	507.838	1.8732e-112	3.00784e-110
12609	Cebpd	-2.26657	7.71034	498.546	1.96891e-110	3.12895e-108
93689	Lmod1	2.43798	6.11314	498.473	2.04287e-110	3.21336e-108
20661	Sort1	2.68708	6.94012	493.68	2.25518e-109	3.51147e-107
170826	Ppargc1b	4.45729	3.73178	491.473	6.8125e-109	1.05015e-106
11861	Arl4a	3.30621	5.84229	486.033	1.03965e-107	1.58676e-105
18175	Nrap	2.30886	5.58271	484.199	2.6065e-107	3.93913e-105
407790	Ndufa4l2	-3.08208	7.22043	480.966	1.31716e-106	1.97127e-104
118453	Mmp28	2.81035	4.72852	480.503	1.66085e-106	2.46173e-104
20271	Scn5a	2.75101	4.74039	479.533	2.69972e-106	3.96345e-104
16480	Jup	1.95421	6.25523	478.234	5.1768e-106	7.52833e-104
241694	Ralgapa2	2.90475	5.81276	470.895	2.04692e-104	2.9489e-102
228859	Fitm2	2.29548	5.7308	468.095	8.32298e-104	1.18795e-101
58909	Fam13a	4.03737	4.37472	467.475	1.13554e-103	1.60591e-101
20583	Snai2	2.08171	6.93603	465.92	2.47496e-103	3.46832e-101
53318	Pdlim3	2.47599	6.04852	465.856	2.55629e-103	3.55002e-101
109272	Mybpc1	2.11763	6.44653	464.464	5.13287e-103	7.06457e-101
243270	Hcar1	4.97083	3.30693	459.973	4.87304e-102	6.64761e-100
226438	Igfn1	2.43601	4.98011	458.324	1.11343e-101	1.50558e-99
242653	Cldn19	-4.23857	3.50693	455.222	5.26885e-101	7.06254e-99
17068	Ly6d	11.5545	2.51973	454.942	6.06231e-101	8.05608e-99
24131	Ldb3	2.0611	6.03707	454.73	6.74152e-101	8.8821e-99
94185	Tnfrsf21	3.1107	4.57654	452.447	2.11657e-100	2.765e-98
241226	Itga8	3.23034	7.31888	451.663	3.13549e-100	4.06164e-98
237847	Rtn4rl1	4.65391	3.98688	450.971	4.43415e-100	5.69603e-98
11826	Aqp1	2.1468	6.7383	449.956	7.37333e-100	9.39338e-98
16688	Krt6b	11.5815	2.54395	442.984	2.42731e-98	3.06697e-96
80879	Slc16a3	-2.28704	6.97837	442.309	3.40413e-98	4.26623e-96
22138	Ttn	2.19773	7.83576	441.396	5.37735e-98	6.68483e-96
106393	Srl	1.97526	7.01912	441.066	6.34476e-98	7.81013e-96
12702	Socs3	-2.08785	5.93841	441.054	6.38389e-98	7.81013e-96
338367	Myo1d	-2.13488	5.75358	438.088	2.82196e-97	3.42523e-95
215798	Adgrg6	-2.20527	5.49749	437.846	3.18521e-97	3.83594e-95
99543	Olfml3	-2.09004	5.65387	436.807	5.36344e-97	6.40911e-95
11931	Atp1b1	3.27037	6.48654	435.44	1.06397e-96	1.26162e-94
14560	Gdf10	4.81576	3.05669	431.066	9.52425e-96	1.12074e-93
20190	Ryr1	2.11165	6.70187	430.264	1.42371e-95	1.66262e-93
19663	Rbpms	2.02346	5.5786	427.648	5.28213e-95	6.12211e-93
104080	Nxph4	-3.32903	4.55252	427.56	5.52002e-95	6.35008e-93
104885	Tmem179	5.06071	2.97673	426.561	9.1052e-95	1.03968e-92
11522	Adh1	3.56743	4.82547	426.173	1.1063e-94	1.25394e-92
16527	Kcnk3	7.75573	2.84133	426.011	1.1998e-94	1.34999e-92
19293	Pvalb	6.53982	3.26559	424.86	2.13602e-94	2.386e-92
101401	Adamts9	1.91023	7.09577	424.448	2.62618e-94	2.91242e-92
225638	Alpk2	4.89103	3.27003	423.911	3.43618e-94	3.78348e-92
14261	Fmo1	3.30898	5.80963	420.285	2.11508e-93	2.31233e-91
394432	Ugt1a7c	2.55327	4.56689	418.386	5.48047e-93	5.9494e-91
238564	Mylk4	2.89692	5.28056	417.86	7.13353e-93	7.68975e-91
12349	Car2	5.01352	3.18925	411.254	1.95479e-91	2.09258e-89
66894	Wwp2	-1.88148	7.09085	410.694	2.58795e-91	2.75126e-89
94249	Slc24a3	2.87211	4.32777	410.413	2.97965e-91	3.14598e-89
17996	Neb	1.89177	7.90611	407.337	1.3928e-90	1.46054e-88
60596	Gucy1a1	11.327	2.29511	407.279	1.43338e-90	1.49295e-88
76252	Atp6v0e2	4.17223	3.60384	407.18	1.50681e-90	1.55889e-88
11464	Actc1	2.14322	8.56358	406.105	2.58253e-90	2.65398e-88
19309	Pygm	2.5094	5.56414	403.723	8.52264e-90	8.70043e-88
74148	Cluh	2.19545	7.27086	400.278	4.78982e-89	4.85757e-87
14268	Fn1	-2.04207	14.3429	399.131	8.51314e-89	8.57713e-87
68655	Fndc1	-1.89442	5.90351	391.771	3.40685e-87	3.41017e-85
18828	Plscr2	-3.06224	4.96684	389.869	8.84002e-87	8.79155e-85
107587	Osr2	3.64154	4.80352	387.632	2.71206e-86	2.6799e-84
20724	Serpinb5	7.82021	2.55978	386.894	3.92613e-86	3.85486e-84
20411	Sorbs1	2.00465	7.08787	386.079	5.90999e-86	5.76598e-84
68792	Srpx2	-2.20573	6.84499	384.338	1.4145e-85	1.37135e-83
12822	Col18a1	3.43659	7.56283	383.53	2.12052e-85	2.04299e-83
67855	Asprv1	7.26226	2.70903	382.5	3.55314e-85	3.40196e-83
59091	Jph2	2.00053	6.37669	381.289	6.52077e-85	6.2048e-83
69217	Plekha4	-2.45825	5.86661	381.043	7.37549e-85	6.97504e-83
68468	Ly6g6c	11.3027	2.28071	379.833	1.35332e-84	1.27204e-82
16858	Lgals7	6.35958	3.05111	379.045	2.0089e-84	1.8768e-82
67606	Fibin	-2.93028	5.34224	375.702	1.07351e-83	9.96875e-82
56349	Net1	1.79194	6.93866	373.028	4.10049e-83	3.78497e-81
11472	Actn2	2.13191	7.07173	372.597	5.09108e-83	4.67137e-81
12389	Cav1	1.77638	9.59496	371.213	1.01866e-82	9.29146e-81
76943	Psapl1	8.94295	2.2792	366.739	9.59889e-82	8.69242e-80
215113	Slc43a2	2.03931	5.44785	366.73	9.64258e-82	8.69242e-80
16847	Lepr	3.24248	3.4386	365.611	1.69003e-81	1.51464e-79
17540	Irag1	2.07785	5.10531	365.388	1.88995e-81	1.68402e-79
108079	Prkaa2	2.79426	3.87412	363.364	5.21263e-81	4.61797e-79
54140	Avpr1a	-1.98897	5.59086	362.951	6.4132e-81	5.64911e-79
72512	Sting1	-2.19313	5.02275	361.252	1.50298e-80	1.31638e-78
17022	Lum	2.32971	7.60008	360.996	1.70875e-80	1.48816e-78
67252	Cap2	1.96569	5.33691	360.215	2.52775e-80	2.18906e-78
114249	Npnt	2.13901	8.74546	357.183	1.15634e-79	9.95813e-78
320712	Abi3bp	-2.30708	9.66956	355.632	2.51627e-79	2.15491e-77
18552	Pcsk5	-2.23195	6.38762	354.079	5.48243e-79	4.66915e-77
77037	Mrap	8.92497	2.30812	352.629	1.1338e-78	9.603e-77
17388	Mmp15	2.50072	4.20943	352.56	1.17378e-78	9.88737e-77
353211	Prune2	1.89042	5.84918	352.502	1.20872e-78	1.01263e-76
225288	Fhod3	2.96456	4.10169	352.084	1.49051e-78	1.24196e-76
242377	Pm20d2	3.8258	3.47358	351.257	2.25657e-78	1.87016e-76
12373	Casq2	1.8758	7.14689	350.701	2.98258e-78	2.45864e-76
22402	Ccn4	-2.57002	5.40858	349.433	5.63075e-78	4.61692e-76
15902	Id2	1.88508	6.80839	349.271	6.10731e-78	4.98118e-76
16979	Lrrn1	1.80329	5.49117	348.302	9.93052e-78	8.05679e-76
15213	Hey1	6.01195	2.60318	347.675	1.35943e-77	1.09715e-75
381290	Atp2b4	1.8923	5.85369	346.653	2.26985e-77	1.82238e-75
13400	Dmpk	1.76848	7.64434	346.52	2.42672e-77	1.93823e-75
24059	Slco2a1	2.44618	6.49343	346.126	2.95684e-77	2.33871e-75
20319	Sfrp2	2.29338	7.5983	346.125	2.95848e-77	2.33871e-75
70564	Prxl2a	3.69489	4.68299	345.855	3.38717e-77	2.66394e-75
320452	P4ha3	-4.84459	5.59542	343.931	8.88687e-77	6.95386e-75
67784	Plxnd1	2.12596	7.69982	342.723	1.6289e-76	1.26815e-74
21922	Clec3b	2.87484	4.71314	342.678	1.66616e-76	1.29065e-74
100952	Emilin1	-1.62526	8.35977	338.202	1.57208e-75	1.21168e-73
16803	Lbp	-1.89108	6.77472	336.566	3.57001e-75	2.7379e-73
11754	Aoc3	2.00018	8.22047	336.273	4.13613e-75	3.15636e-73
16403	Itga6	2.98473	5.8383	334.056	1.25742e-74	9.54837e-73
16449	Jag1	2.24985	6.64048	331.927	3.65698e-74	2.76335e-72
192199	Rspo1	3.45149	3.54241	328.548	1.99105e-73	1.49717e-71
14199	Fhl1	2.11138	8.34226	328.115	2.47415e-73	1.85141e-71
50915	Grb14	-2.1813	6.50987	327.014	4.2976e-73	3.20036e-71
76293	Mfap4	-4.72245	3.1531	326.797	4.79066e-73	3.55039e-71
19225	Ptgs2	-2.53939	4.16532	326.416	5.80001e-73	4.27785e-71
16658	Mafb	1.61266	6.76353	326.404	5.83392e-73	4.28238e-71
12843	Col1a2	-1.78017	12.4584	322.961	3.28071e-72	2.39678e-70
66864	Clec14a	2.73376	3.63202	322.428	4.2851e-72	3.1158e-70
12821	Col17a1	4.32486	2.80435	320.598	1.0731e-71	7.76609e-70
66853	Pnpla2	4.57185	8.07647	320.16	1.33671e-71	9.62868e-70
16007	Ccn1	-1.6803	8.83376	318.872	2.55098e-71	1.829e-69
14677	Gnai1	2.01246	4.84232	317.944	4.06241e-71	2.89917e-69
18008	Nes	1.66653	6.9055	317.442	5.22507e-71	3.71173e-69
68339	Ccdc88c	3.50156	4.04012	316.004	1.07499e-70	7.60135e-69
11517	Adcyap1r1	4.56186	3.14194	314.54	2.24038e-70	1.57696e-68
319480	Itga11	-2.10723	7.95194	313.739	3.34791e-70	2.34582e-68
104158	Ces1d	8.70086	2.0705	313.44	3.88961e-70	2.71304e-68
15904	Id4	1.87399	5.96628	312.059	7.77531e-70	5.39893e-68
110095	Pygl	-1.74926	5.98921	311.206	1.19244e-69	8.24279e-68
20450	St8sia2	1.7423	5.40189	310.291	1.88696e-69	1.29855e-67
17294	Mest	2.90839	6.68759	310.194	1.98101e-69	1.35721e-67
75104	Mmd2	10.9711	1.9439	310.058	2.12103e-69	1.44671e-67
231148	Ablim2	2.40435	4.1657	308.374	4.9376e-69	3.353e-67
11459	Acta1	1.80554	9.51314	307.626	7.18538e-69	4.85801e-67
17392	Mmp3	1.92119	5.0085	306.328	1.37795e-68	9.24187e-67
231207	Cpeb2	1.68088	5.63211	306.326	1.37894e-68	9.24187e-67
11982	Atp10a	-1.89234	4.89361	306.066	1.57152e-68	1.0487e-66
16859	Lgals9	-1.89763	5.59727	305.786	1.80771e-68	1.20112e-66
242702	Myom3	1.98613	5.60875	305.611	1.97452e-68	1.30632e-66
18451	P4ha1	-1.61338	8.19677	305.495	2.09216e-68	1.37823e-66
319713	Ablim3	2.10442	5.46755	305.237	2.38103e-68	1.56186e-66
319942	A530016L24Rik	7.37018	4.78793	304.622	3.24183e-68	2.11749e-66
67916	Plpp3	1.78596	9.97918	304.36	3.69748e-68	2.40492e-66
118449	Synpo2	2.23524	5.89921	303.5	5.69069e-68	3.6858e-66
11489	Adam12	2.08073	7.70825	302.38	9.98131e-68	6.43774e-66
18605	Enpp1	-1.96171	5.47128	302.35	1.01362e-67	6.51042e-66
72309	Tmem158	2.4749	4.50881	301.802	1.33406e-67	8.53303e-66
54139	Irf6	5.57502	2.21069	300.022	3.25817e-67	2.0754e-65
12816	Col12a1	-2.01167	9.84071	299.576	4.07616e-67	2.58576e-65
11816	Apoe	2.68061	9.01742	299.078	5.23217e-67	3.30549e-65
231440	Parm1	2.32389	4.49263	298.295	7.74733e-67	4.87449e-65
12554	Cdh13	1.90588	6.2315	297.891	9.48933e-67	5.94626e-65
71145	Scara5	2.54133	6.52533	296.429	1.97606e-66	1.23324e-64
12552	Cdh11	1.60693	9.6983	296.415	1.98986e-66	1.23684e-64
74591	Abca12	10.8864	1.87052	295.523	3.11279e-66	1.92706e-64
11658	Alcam	2.78922	5.07472	295.235	3.59629e-66	2.21747e-64
30878	Apln	-1.96644	5.32289	295.061	3.92545e-66	2.41079e-64
21859	Timp3	-1.66273	9.88975	294.403	5.46014e-66	3.34e-64
18452	P4ha2	-1.80707	7.45891	293.971	6.7821e-66	4.13226e-64
12814	Col11a1	-2.26107	8.51383	293.938	6.89341e-66	4.18354e-64
228662	Btbd3	-1.57475	7.14458	293.663	7.9145e-66	4.78439e-64
211347	Pank3	2.30204	8.10676	291.458	2.39248e-65	1.44063e-63
225845	Plaat3	3.0787	6.84837	291.071	2.90546e-65	1.74271e-63
20649	Sntb1	2.26816	4.76624	290.768	3.38169e-65	2.0205e-63
78283	Map7d2	7.75599	1.91093	290.602	3.67562e-65	2.18763e-63
18534	Pck1	10.8444	1.82292	289.55	6.23191e-65	3.6948e-63
18198	Musk	2.23636	4.28511	289.166	7.55681e-65	4.46315e-63
23945	Mgll	4.05873	6.83781	289.153	7.60664e-65	4.47544e-63
18616	Peg3	1.78844	6.62798	288.931	8.50216e-65	4.9833e-63
239217	Kctd12	1.95784	4.67925	287.31	1.91752e-64	1.11965e-62
59011	Myoz1	3.9316	2.88366	284.742	6.95273e-64	4.04439e-62
20750	Spp1	-3.33814	10.5921	284.672	7.2046e-64	4.17514e-62
66848	Fuca2	-1.8651	4.86572	284.476	7.94561e-64	4.58732e-62
110880	Scn4a	2.59511	3.88099	284.223	9.02227e-64	5.18949e-62
69693	Pof1b	10.8134	1.79617	284.046	9.86311e-64	5.65204e-62
11513	Adcy7	-2.5992	3.68774	283.159	1.53851e-63	8.78377e-62
69121	Chrdl2	-10.7401	1.68582	282.822	1.82254e-63	1.0367e-61
72169	Trim29	7.02757	2.85703	281.974	2.78869e-63	1.58043e-61
320916	Wscd2	2.54942	3.57267	281.852	2.96477e-63	1.67406e-61
15551	Htr1b	3.25347	3.22471	281.834	2.99218e-63	1.68337e-61
16981	Lrrn3	3.29493	4.06409	281.4	3.71902e-63	2.08468e-61
24063	Spry1	1.76408	6.01152	279.401	1.01435e-62	5.66528e-61
192897	Itgb4	2.84544	4.51212	279.031	1.22092e-62	6.79442e-61
19139	Prps1	1.82832	5.54548	278.669	1.46438e-62	8.11992e-61
21810	Tgfbi	-2.27143	4.62771	277.459	2.6873e-62	1.48476e-60
13179	Dcn	1.959	8.33636	277.425	2.73333e-62	1.5048e-60
59126	Nek6	-1.70167	6.62507	277.275	2.94805e-62	1.61723e-60
69564	Nmrk2	5.09493	2.50022	276.728	3.87861e-62	2.12017e-60
11548	Adra1b	3.46192	3.0078	276.486	4.37867e-62	2.38506e-60
231470	Fras1	4.82034	2.74668	275.819	6.11922e-62	3.3214e-60
12583	Cdo1	4.91114	7.37696	275.649	6.66468e-62	3.60477e-60
23876	Fbln5	-1.93086	9.10566	275.296	7.95749e-62	4.28897e-60
15360	Hmgcs2	3.17232	4.06639	274.026	1.505e-61	8.08347e-60
60613	Kcnq4	1.95591	4.41356	271.241	6.08829e-61	3.25871e-59
54635	Pdgfc	-1.72908	5.61466	270.909	7.19247e-61	3.8364e-59
225256	Dsg1b	10.7475	1.72846	270.633	8.25896e-61	4.39006e-59
12837	Col8a1	-1.52008	10.3444	270.429	9.14914e-61	4.84653e-59
19266	Ptprd	1.63831	5.22234	268.926	1.94518e-60	1.02688e-58
269633	Wdr86	2.59746	5.15463	266.535	6.45707e-60	3.39712e-58
12338	Capn6	-1.65476	5.86244	266.45	6.73979e-60	3.5338e-58
74051	Steap2	-1.76961	5.78213	266.175	7.73848e-60	4.04369e-58
229949	Ak5	-1.5862	5.92569	264.889	1.47525e-59	7.68279e-58
12443	Ccnd1	1.54259	7.71809	264.495	1.79757e-59	9.32979e-58
13609	S1pr1	1.7427	5.62837	264.387	1.89754e-59	9.81561e-58
11640	Akap1	1.46536	6.30552	264.023	2.27795e-59	1.1744e-57
24136	Zeb2	1.64483	7.58336	263.878	2.45077e-59	1.25929e-57
57814	Kcne4	-2.01871	4.94056	262.947	3.90942e-59	1.99833e-57
17883	Myh3	1.49516	9.43271	262.944	3.91499e-59	1.99833e-57
18563	Pcx	3.28939	7.80974	261.484	8.14585e-59	4.14417e-57
70186	Fam162a	-1.46559	6.95454	260.886	1.09985e-58	5.57705e-57
378431	Txlnb	2.33766	3.99593	260.228	1.53042e-58	7.73488e-57
270685	Mthfd1l	-1.92537	4.82647	260.154	1.58797e-58	7.99951e-57
13350	Dgat1	2.30487	6.09574	259.933	1.7751e-58	8.9131e-57
330812	Rnf150	-2.48389	5.42482	259.72	1.97503e-58	9.88477e-57
381308	Ifi211	-2.13048	4.65512	259.661	2.03403e-58	1.01471e-56
666794	Rbm24	2.20247	4.22065	259.536	2.16598e-58	1.07705e-56
74137	Nuak2	-2.52054	4.86585	259.276	2.46823e-58	1.2234e-56
320046	F730043M19Rik	-1.94311	5.03659	258.864	3.03506e-58	1.49953e-56
252837	Ackr4	2.47879	4.33902	258.39	3.85004e-58	1.89611e-56
13809	Enpep	3.27614	3.66945	258.302	4.02457e-58	1.97575e-56
76142	Ppp1r14c	2.85753	3.36037	257.877	4.97968e-58	2.43688e-56
234564	Ces1f	10.6541	1.62976	257.549	5.8723e-58	2.86461e-56
64075	Smoc1	1.40622	7.97014	257.115	7.30031e-58	3.54998e-56
21952	Tnni1	1.37712	7.31038	256.499	9.94861e-58	4.82257e-56
16560	Kif1a	1.62378	5.69967	256.177	1.16911e-57	5.64949e-56
18053	Ngfr	3.1423	3.08005	255.636	1.53418e-57	7.39042e-56
244757	Glb1l2	5.47717	2.56413	254.592	2.59049e-57	1.244e-55
20620	Plk2	-1.48538	7.31314	253.995	3.49522e-57	1.67325e-55
100042178	Prdm16os	3.78365	2.6278	253.967	3.54508e-57	1.69187e-55
121022	Mrps6	1.47434	5.75199	253.91	3.64743e-57	1.73534e-55
231549	Lrrc8d	2.52458	3.75019	253.704	4.04495e-57	1.91855e-55
66607	Ms4a4d	-2.941	4.16612	253.697	4.06005e-57	1.9198e-55
19395	Rasgrp2	4.29982	2.44876	253.577	4.31246e-57	2.03292e-55
12709	Ckb	1.44806	7.71504	253.457	4.57868e-57	2.15184e-55
228003	Klhl41	1.39384	6.28616	253.131	5.39361e-57	2.52713e-55
11529	Adh7	2.31552	4.37254	252.449	7.59471e-57	3.54765e-55
17901	Myl1	1.72176	8.59762	252.139	8.87444e-57	4.13291e-55
16009	Igfbp3	1.48613	6.49284	252.032	9.36233e-57	4.347e-55
64540	Tspan4	-1.44257	7.38569	251.913	9.93887e-57	4.60083e-55
13806	Eno1	-1.44095	11.0401	251.733	1.08824e-56	5.02252e-55
76187	Adhfe1	2.37071	4.84146	251.486	1.23187e-56	5.66842e-55
11735	Ank3	-1.88876	5.56241	251.268	1.37439e-56	6.3054e-55
227753	Gsn	1.44283	11.0033	250.298	2.23572e-56	1.02266e-54
319909	Ism1	-1.55211	6.85489	250.177	2.37617e-56	1.08369e-54
259277	Klk8	5.84614	2.07825	249.682	3.04622e-56	1.38518e-54
12842	Col1a1	-1.54368	12.0321	249.562	3.23605e-56	1.46717e-54
11535	Adm	-1.69037	7.21377	249.433	3.45152e-56	1.56027e-54
68709	Cilp2	3.6651	4.06383	248.831	4.66935e-56	2.10462e-54
11447	Chrnd	2.00691	5.18091	248.666	5.07311e-56	2.27994e-54
76757	Trdn	2.27154	4.10073	248.554	5.36628e-56	2.40469e-54
11676	Aldoc	-2.49297	4.15408	247.849	7.64677e-56	3.41666e-54
20308	Ccl9	1.97078	5.90222	246.795	1.29768e-55	5.78142e-54
11832	Aqp7	7.58455	3.17103	246.318	1.64861e-55	7.32373e-54
11307	Abcg1	3.4328	4.05443	245.7	2.2483e-55	9.95905e-54
76566	Rflnb	-1.88007	6.48981	245.224	2.85507e-55	1.26106e-53
17927	Myod1	2.01176	5.1229	243.066	8.43785e-55	3.70887e-53
14613	Gja5	1.54633	5.41231	243.064	8.44511e-55	3.70887e-53
70405	Calml3	4.36543	2.89348	242.629	1.05068e-54	4.6012e-53
17161	Maoa	1.67496	7.00277	242.333	1.21918e-54	5.324e-53
11609	Agtr2	5.01161	2.36703	242.064	1.39546e-54	6.07655e-53
21824	Thbd	1.52677	8.06974	241.926	1.49532e-54	6.49308e-53
17717	ND2	1.5704	10.9573	241.622	1.74186e-54	7.54234e-53
224129	Adcy5	3.9702	6.58661	239.715	4.53814e-54	1.95953e-52
19283	Ptprz1	2.68482	3.42724	237.992	1.078e-53	4.64173e-52
16543	Mdfic	-1.47188	5.9818	237.818	1.17636e-53	5.05115e-52
219148	Fam167a	3.35731	3.09866	237.781	1.19802e-53	5.12986e-52
65256	Asb2	3.62067	2.88019	237.688	1.25539e-53	5.36063e-52
26878	B3galt2	5.21194	5.71126	237.593	1.31699e-53	5.60814e-52
72039	Mccc1	2.17888	6.00948	236.959	1.81067e-53	7.68912e-52
64085	Clstn2	4.15451	3.78517	236.634	2.13088e-53	9.02406e-52
54613	St3gal6	1.88909	4.67275	235.845	3.16769e-53	1.33781e-51
434246	Trim72	1.41385	5.7005	234.103	7.59513e-53	3.19888e-51
20682	Sox9	-1.35369	7.58378	234.058	7.76859e-53	3.26302e-51
50772	Mapk6	1.62981	7.71772	233.61	9.72905e-53	4.07536e-51
50490	Nox4	-2.19673	3.94727	232.999	1.32205e-52	5.52286e-51
11474	Actn3	1.56294	7.1679	232.232	1.94391e-52	8.09874e-51
67477	Abhd15	3.84933	2.96438	231.325	3.06525e-52	1.27361e-50
18783	Pla2g4a	-1.44055	5.50048	229.154	9.11789e-52	3.77829e-50
140493	Kcnn3	2.14242	4.32042	228.922	1.02415e-51	4.2325e-50
11435	Chrna1	1.57354	6.84884	228.85	1.06226e-51	4.37826e-50
12606	Cebpa	3.47966	8.6943	228.809	1.08437e-51	4.4575e-50
26457	Slc27a1	2.14743	6.78568	228.78	1.09987e-51	4.50917e-50
66447	Mgst3	2.25045	4.24811	228.573	1.22059e-51	4.99083e-50
252838	Tox	-2.72653	3.34582	228.44	1.30505e-51	5.32207e-50
22042	Tfrc	2.40481	7.36429	227.604	1.98527e-51	8.07465e-50
171508	Creld1	1.62402	6.14933	227.045	2.62927e-51	1.06658e-49
245945	Rbm47	3.68848	2.77974	226.948	2.76047e-51	1.11687e-49
18655	Pgk1	-1.44075	9.50843	225.283	6.36823e-51	2.5698e-49
13371	Dio2	2.12534	4.96968	225.205	6.62455e-51	2.66625e-49
14184	Fgfr3	2.45932	3.98501	225.068	7.09576e-51	2.84847e-49
18576	Pde3b	1.84381	6.48455	224.998	7.34963e-51	2.94272e-49
241113	Prkag3	2.13915	3.94398	224.952	7.52221e-51	3.00401e-49
74166	Tmem38a	1.71395	5.58088	223.962	1.23639e-50	4.92481e-49
105387	Akr1c14	-2.17464	4.06687	223.706	1.40587e-50	5.58545e-49
214384	Myocd	5.87678	2.09913	223.241	1.77618e-50	7.02509e-49
54353	Skap2	-1.39365	5.7665	223.24	1.77735e-50	7.02509e-49
22368	Trpv2	2.4829	3.68652	223.224	1.79154e-50	7.06307e-49
58178	Sorcs1	3.91906	2.74104	221.73	3.79431e-50	1.49207e-48
269831	Tspan12	2.5504	3.6803	221.72	3.8126e-50	1.49545e-48
70021	Nt5dc2	1.79669	5.86364	221.359	4.57052e-50	1.78819e-48
229562	Sprr4	10.4248	1.42468	221.318	4.6661e-50	1.82096e-48
56072	Lgals12	7.91468	4.27572	219.901	9.50487e-50	3.69994e-48
235320	Zbtb16	5.70622	2.33247	219.561	1.12768e-49	4.37865e-48
72383	Cnfn	10.4586	1.45283	219.426	1.20659e-49	4.67327e-48
67426	Coq8a	1.47361	5.42103	219.196	1.35463e-49	5.23349e-48
56429	Dpt	1.5332	6.06505	219.103	1.419e-49	5.46849e-48
78892	Crispld2	1.71949	5.67967	218.627	1.80238e-49	6.92858e-48
382111	Susd5	-1.6316	5.26401	217.574	3.05877e-49	1.17291e-47
58223	Mmp19	-1.39693	5.56886	217.561	3.07887e-49	1.17769e-47
226041	Pgm5	2.48377	5.35714	217.277	3.55058e-49	1.35476e-47
17921	Myo7a	-1.67004	5.72846	217.152	3.78065e-49	1.43568e-47
13063	Cycs	1.60507	6.12375	217.152	3.7813e-49	1.43568e-47
13713	Elk3	-1.66752	5.58003	216.063	6.53411e-49	2.47477e-47
16918	Mycl	3.63977	2.57241	215.879	7.16799e-49	2.7082e-47
18128	Notch1	1.31492	6.36911	214.806	1.2288e-48	4.63128e-47
67469	Abhd5	1.8059	5.99481	214.634	1.3394e-48	5.0358e-47
67573	Loxl4	-1.65027	4.71477	214.275	1.60385e-48	6.01542e-47
27280	Phlda3	1.33871	7.27961	214.228	1.64274e-48	6.1463e-47
71939	Apol6	2.4244	4.66205	214.078	1.77057e-48	6.60856e-47
20377	Sfrp1	-3.03375	10.3059	214.004	1.83807e-48	6.84393e-47
227700	Sh3glb2	1.56916	6.59868	213.749	2.08885e-48	7.75896e-47
80796	Calm4	10.4012	1.3901	213.444	2.43546e-48	9.02466e-47
26971	Pla2g2f	10.5258	1.5381	213.363	2.53664e-48	9.37706e-47
11898	Ass1	1.97553	5.35703	212.112	4.75385e-48	1.75312e-46
233328	Lrrk1	-1.33921	6.56684	211.857	5.40471e-48	1.98839e-46
29815	Bcar3	2.89119	4.3318	211.847	5.43125e-48	1.9934e-46
23892	Grem1	1.62521	5.58197	211.708	5.82458e-48	2.13268e-46
69635	Dapk1	1.33308	7.9902	211.084	7.96814e-48	2.91064e-46
18583	Pde7a	-1.36561	5.85127	210.791	9.23235e-48	3.36446e-46
12550	Cdh1	6.99043	3.13164	210.596	1.01825e-47	3.70197e-46
18822	Plod1	-1.32791	7.49214	210.065	1.32972e-47	4.82298e-46
108682	Gpt2	2.18978	5.51842	208.492	2.9295e-47	1.06005e-45
11482	Acvrl1	-1.36524	5.72278	208.341	3.16039e-47	1.14092e-45
74100	Arpp21	2.17172	4.07024	208.319	3.19627e-47	1.15118e-45
12332	Capg	-1.37949	6.66423	208.176	3.43342e-47	1.23371e-45
54216	Pcdh7	1.42336	5.51251	208.114	3.54289e-47	1.27008e-45
106572	Rab31	-1.24933	6.66045	207.602	4.5816e-47	1.63864e-45
63955	Cables1	1.86538	4.9958	207.252	5.46184e-47	1.94894e-45
72434	Lypd3	8.13464	1.46207	206.966	6.30581e-47	2.2449e-45
71795	Pitpnc1	1.7224	5.33753	206.403	8.37038e-47	2.97303e-45
74511	Lrrc17	1.88064	5.58383	205.88	1.08836e-46	3.85681e-45
18647	Cdk14	1.57016	5.98411	205.741	1.16689e-46	4.12559e-45
14465	Gata6	2.49219	3.38919	205.269	1.47968e-46	5.2195e-45
66166	S100a14	5.74171	1.99858	204.779	1.89199e-46	6.65867e-45
107589	Mylk	1.4143	8.73858	204.655	2.01356e-46	7.07039e-45
66895	Pxdc1	-1.59755	5.13301	204.491	2.18657e-46	7.66045e-45
215615	Rnpep	1.42534	5.79828	204.472	2.20853e-46	7.71983e-45
238384	Slc24a4	2.68239	3.2809	204.343	2.35577e-46	8.21587e-45
330064	Slc5a6	2.35888	4.06441	204.289	2.42087e-46	8.42385e-45
20971	Sdc4	-1.26479	8.15498	203.944	2.87843e-46	9.99347e-45
18417	Cldn11	6.80737	1.85706	203.713	3.2324e-46	1.11972e-44
236900	Pdk3	-1.35955	5.60282	203.556	3.49785e-46	1.20896e-44
20656	Sod2	1.34627	6.44282	202.316	6.5225e-46	2.24931e-44
232371	C1rl	-1.7574	4.42418	201.683	8.96749e-46	3.08558e-44
13120	Cyp4b1	2.93076	4.24678	200.401	1.70713e-45	5.8609e-44
23948	Mmp17	2.5425	4.02317	199.67	2.46544e-45	8.44549e-44
12575	Cdkn1a	1.28426	7.60345	199.575	2.5851e-45	8.83578e-44
16206	Lrig1	2.4947	6.85611	198.591	4.23954e-45	1.44398e-43
14789	P3h3	-1.27737	7.69323	198.589	4.24342e-45	1.44398e-43
15926	Idh1	1.57348	7.91637	198.209	5.13745e-45	1.74436e-43
27376	Slc25a10	3.00044	6.68657	197.676	6.71285e-45	2.27425e-43
14874	Gstz1	2.0807	6.31552	197.269	8.23689e-45	2.78447e-43
11601	Angpt2	3.21816	3.20181	196.436	1.25198e-44	4.22304e-43
70638	Fam189a1	4.81731	1.9934	196.41	1.26847e-44	4.26931e-43
16776	Lama5	1.43286	6.78073	196.367	1.29646e-44	4.354e-43
66725	Lrrk2	-1.32443	5.40308	194.926	2.67392e-44	8.96054e-43
384009	Glipr2	-1.24041	6.56659	194.687	3.01513e-44	1.0082e-42
20256	Clec11a	-1.38277	6.69669	194.008	4.24208e-44	1.4154e-42
57278	Bcam	1.46833	6.02276	193.769	4.78243e-44	1.59225e-42
50799	Slc25a13	-2.0018	3.94444	193.245	6.22515e-44	2.06812e-42
216197	Ckap4	-1.20994	7.80239	193.212	6.32773e-44	2.09768e-42
56398	Chp1	1.30259	8.33461	193.199	6.37035e-44	2.10727e-42
67834	Idh3a	1.20038	6.51943	192.87	7.51576e-44	2.48084e-42
100129	Gpr153	-1.32435	6.58497	192.156	1.07588e-43	3.54374e-42
27410	Abca3	1.42044	5.59611	192.01	1.15775e-43	3.80526e-42
229699	Slc16a4	-2.38432	3.83421	191.741	1.32548e-43	4.34729e-42
246049	Slc36a2	8.35954	5.38688	191.076	1.8509e-43	6.05768e-42
83603	Elovl4	3.15958	2.75357	191.03	1.89422e-43	6.1863e-42
14260	Fmn1	-1.75894	4.64339	190.993	1.9306e-43	6.29179e-42
68797	Pdgfrl	-1.52112	4.7704	190.884	2.03901e-43	6.63107e-42
50530	Mfap5	-1.61931	6.46093	190.391	2.61203e-43	8.47672e-42
18162	Npr3	-1.40685	6.23723	190.155	2.94034e-43	9.52212e-42
16840	Cnmd	-1.3151	7.14651	189.831	3.46031e-43	1.11825e-41
13823	Epb41l3	-1.4254	6.06459	189.307	4.50484e-43	1.45276e-41
14118	Fbn1	-1.34859	10.1503	188.942	5.41048e-43	1.74118e-41
320078	Olfml2b	1.53127	7.1059	188.932	5.43949e-43	1.74687e-41
53614	Reck	-1.3607	8.08823	188.365	7.23298e-43	2.31801e-41
329628	Fat4	1.44928	8.34062	188.251	7.656e-43	2.44849e-41
19088	Prkar2b	1.92593	6.87802	187.439	1.15196e-42	3.67648e-41
56448	Cyp2d22	-3.0496	3.11285	187.339	1.21128e-42	3.85784e-41
14745	Lpar1	-1.69408	6.84325	186.965	1.46166e-42	4.64567e-41
17926	Myoc	3.75705	3.07941	186.941	1.47926e-42	4.69193e-41
231510	Gpat3	7.38107	4.86205	186.85	1.54838e-42	4.9011e-41
98932	Myl9	1.63306	8.72636	186.833	1.5616e-42	4.9328e-41
68527	Ucma	-2.23384	4.21229	186.763	1.61742e-42	5.09867e-41
17524	Mpp1	1.42163	6.88377	186.497	1.84934e-42	5.81786e-41
15439	Hp	2.22453	8.18585	186.348	1.99307e-42	6.25727e-41
233079	Ffar2	10.1726	1.16272	186.194	2.15378e-42	6.74806e-41
11551	Adra2a	4.02874	3.18233	186.101	2.256e-42	7.05402e-41
67455	Klhl13	1.40654	5.39485	185.887	2.51242e-42	7.83988e-41
94187	Zfp423	1.95505	4.23846	185.411	3.19287e-42	9.94304e-41
68507	Ppfia4	1.8872	4.55348	185.277	3.41476e-42	1.06126e-40
268935	Scube3	1.8312	4.21711	185.231	3.49431e-42	1.0838e-40
171212	Galnt10	-1.22273	6.85952	185.059	3.81072e-42	1.17956e-40
94227	Pi15	-1.53712	7.66123	185.037	3.85208e-42	1.18998e-40
140559	Igsf8	-1.59745	5.96492	183.964	6.60803e-42	2.03726e-40
12036	Bcat2	1.92405	6.68543	183.844	7.01676e-42	2.15895e-40
17873	Gadd45b	-1.54867	5.21383	182.894	1.13128e-41	3.47384e-40
435965	Lrp3	1.42433	5.67051	182.809	1.1804e-41	3.61748e-40
16450	Jag2	2.32238	3.14499	182.593	1.31603e-41	4.02511e-40
104776	Aldh6a1	1.5838	7.30404	182.442	1.41961e-41	4.33333e-40
13510	Dsg1a	10.2045	1.21731	182.166	1.63081e-41	4.96816e-40
100042480	Nhsl2	1.73242	4.87066	182.061	1.71921e-41	5.22714e-40
11689	Alox5	3.42435	2.55529	182.013	1.76205e-41	5.34686e-40
18113	Nnmt	1.65509	4.9488	181.543	2.23131e-41	6.7575e-40
320782	Tmem154	-3.14743	3.06018	180.985	2.95325e-41	8.92636e-40
12226	Btg1	1.27785	7.18559	180.717	3.37902e-41	1.01933e-39
212647	Aldh4a1	1.71663	5.23205	180.593	3.59624e-41	1.08274e-39
20324	Cavin2	1.18359	6.88816	180.358	4.04903e-41	1.21668e-39
241327	Olfml2a	2.65567	6.16032	180.058	4.70618e-41	1.4114e-39
12490	Cd34	-2.11942	4.14374	179.763	5.45925e-41	1.63407e-39
269855	Ssc5d	-1.90723	5.08568	179.622	5.86158e-41	1.75109e-39
208777	Sned1	1.56166	11.0346	179.476	6.30775e-41	1.88074e-39
67749	Mgarp	-2.55425	3.16225	178.697	9.33247e-41	2.77722e-39
216961	Coro6	2.1792	4.13766	178.357	1.10706e-40	3.28812e-39
68682	Slc44a2	-1.2075	7.82607	178.324	1.12546e-40	3.33634e-39
319520	Dusp4	2.93637	4.97197	178.063	1.28308e-40	3.79629e-39
12479	Cd1d1	1.63556	5.90824	177.71	1.53244e-40	4.5254e-39
54338	Slc23a2	1.30934	6.29384	177.525	1.68191e-40	4.9573e-39
212898	Dse	-1.19055	6.92042	177.421	1.77229e-40	5.21371e-39
17082	Il1rl1	-5.0329	7.83395	177.169	2.01146e-40	5.90603e-39
229357	Gpr149	4.99361	1.51927	177.071	2.11349e-40	6.19381e-39
56177	Olfm1	1.47272	4.66919	176.838	2.37583e-40	6.94941e-39
14239	Foxs1	3.30751	2.96337	176.414	2.9409e-40	8.58597e-39
21924	Tnnc1	1.2541	7.17707	176.241	3.20808e-40	9.34831e-39
68203	Diras2	4.09234	2.0043	176.141	3.37268e-40	9.80939e-39
215210	Tmem120a	2.19341	6.20748	176.048	3.53489e-40	1.02618e-38
13429	Dnm1	-1.28041	6.12661	175.801	4.00208e-40	1.15962e-38
207521	Dtx4	1.57253	5.16435	175.559	4.52104e-40	1.30754e-38
270192	Rab6b	1.72036	4.91792	175.406	4.88244e-40	1.40942e-38
11492	Adam19	1.34166	6.88008	175.259	5.25581e-40	1.51436e-38
24066	Spry4	2.2838	4.04637	175.045	5.85328e-40	1.68336e-38
22337	Vdr	-2.54335	4.68189	174.548	7.51357e-40	2.15683e-38
18205	Ntf3	7.3771	1.17725	174.069	9.56304e-40	2.74004e-38
245857	Ssh3	-1.4181	4.77888	173.81	1.08904e-39	3.11456e-38
13850	Ephx2	4.19532	6.01318	173.573	1.22681e-39	3.5021e-38
21366	Slc6a6	1.40059	9.43439	173.256	1.43875e-39	4.09951e-38
53883	Celsr2	3.37111	3.02623	173.134	1.53026e-39	4.3522e-38
16468	Jarid2	1.4896	5.41102	172.965	1.66604e-39	4.72965e-38
245638	Tbc1d8b	-1.29298	5.30547	172.516	2.08744e-39	5.91504e-38
269823	Pon3	-1.56472	4.663	172.125	2.54073e-39	7.18631e-38
105785	Kdelr3	-1.63678	5.28895	171.896	2.85171e-39	8.05112e-38
320609	Strip2	2.72827	3.63999	171.586	3.33218e-39	9.39042e-38
53313	Atp2a3	6.25248	1.3885	171.512	3.45902e-39	9.73008e-38
108897	Aif1l	1.60579	4.85353	171.399	3.66143e-39	1.02807e-37
57319	Smpdl3a	-1.80138	5.29052	171.297	3.85369e-39	1.08008e-37
11443	Chrnb1	1.52406	4.6103	171.199	4.04951e-39	1.13291e-37
71361	Aifm2	2.02683	5.23947	170.905	4.69278e-39	1.31049e-37
72585	Lypd1	4.87696	3.20748	170.493	5.77468e-39	1.607e-37
20603	Sms	1.30616	5.40466	170.493	5.77541e-39	1.607e-37
56615	Mgst1	1.67882	7.58255	169.92	7.70085e-39	2.13889e-37
22004	Tpm2	1.41503	9.15067	169.794	8.20448e-39	2.27468e-37
73181	Nfatc4	-1.1986	6.47867	169.61	9.00401e-39	2.49186e-37
12180	Smyd1	1.33359	5.25217	169.562	9.21996e-39	2.54705e-37
21892	Tll1	-2.01839	3.78927	169.341	1.0308e-38	2.84253e-37
18111	Nnat	2.25875	3.33646	169.246	1.08093e-38	2.97545e-37
18791	Plat	-1.65507	5.65005	169.239	1.0846e-38	2.98025e-37
67266	Dipk1a	-1.79216	4.8784	168.734	1.39834e-38	3.83547e-37
18383	Tnfrsf11b	-1.63962	5.01479	168.712	1.41422e-38	3.87214e-37
16691	Krt8	4.3464	2.03529	168.561	1.52532e-38	4.16894e-37
239463	Fam83a	7.54607	1.81386	168.411	1.64498e-38	4.48802e-37
71207	Nudt4	1.40043	8.44354	168.062	1.96054e-38	5.33952e-37
20482	Skil	-1.76352	4.59018	168.006	2.01682e-38	5.48311e-37
22234	Ugcg	-1.61176	7.84563	167.809	2.22698e-38	6.04381e-37
18121	Nog	2.75034	3.53118	167.211	3.00772e-38	8.14834e-37
226101	Myof	-1.39063	7.85791	167.141	3.11659e-38	8.42846e-37
23886	Gdf15	3.94261	1.83139	167.117	3.15436e-38	8.51566e-37
72281	Sh2d4a	2.73356	2.71511	166.81	3.68036e-38	9.91831e-37
70370	Fbln7	2.17292	3.47482	166.771	3.75457e-38	1.01006e-36
68303	Fam114a1	-1.11207	7.28212	166.508	4.28497e-38	1.15075e-36
68070	Pdzd2	1.91477	6.32995	166.406	4.50924e-38	1.20887e-36
57764	Ntn4	1.60004	4.95199	166.308	4.73709e-38	1.26775e-36
19223	Ptgis	-1.38392	6.58684	165.913	5.77997e-38	1.54416e-36
21956	Tnnt2	1.22174	6.30224	165.815	6.07098e-38	1.6191e-36
78908	Igsf3	-1.33898	6.21758	165.525	7.02384e-38	1.86999e-36
17258	Mef2a	1.09703	7.13941	165.511	7.07527e-38	1.88044e-36
243725	Ppp1r9a	2.71562	3.69414	165.356	7.64886e-38	2.02938e-36
16728	L1cam	4.06064	2.00581	165.33	7.7479e-38	2.05213e-36
12832	Col5a2	-1.17336	11.0491	165.226	8.16657e-38	2.15931e-36
68750	Rreb1	1.37644	6.73438	165.108	8.66192e-38	2.28636e-36
11568	Aebp1	-1.63047	10.533	164.418	1.2257e-37	3.22978e-36
17719	ND4	1.26668	10.9185	164.358	1.26362e-37	3.324e-36
14961	H2-Ab1	-2.5643	2.74488	164.236	1.34361e-37	3.52841e-36
229665	Ampd1	4.37451	1.61548	163.987	1.52287e-37	3.99237e-36
14066	F3	-1.31992	7.96231	163.651	1.80307e-37	4.71889e-36
64293	Stk32b	2.86792	3.01994	163.305	2.14558e-37	5.60577e-36
232748	Tcaf2	-1.38288	4.91019	163.066	2.41975e-37	6.3114e-36
26381	Esrrg	4.10839	1.73431	162.752	2.83372e-37	7.37868e-36
14633	Gli2	1.61574	4.49643	162.292	3.57222e-37	9.28598e-36
71566	Clmp	-1.13627	6.85289	162.169	3.79913e-37	9.8592e-36
338372	Map3k9	3.03503	2.78835	161.961	4.21938e-37	1.09314e-35
16950	Loxl3	-1.29397	6.3497	161.894	4.36376e-37	1.12865e-35
27360	Add3	1.35389	6.25672	161.172	6.27613e-37	1.62055e-35
18003	Nedd9	-1.37593	6.39767	161.13	6.40879e-37	1.65203e-35
16516	Kcnj15	-3.86337	2.65066	161.108	6.48013e-37	1.66763e-35
224008	Spidr	-1.55924	5.92682	160.956	6.99353e-37	1.79675e-35
242202	Pde5a	1.671	4.46162	160.887	7.24159e-37	1.85739e-35
107769	Tm6sf1	2.42158	3.85617	160.774	7.66524e-37	1.96279e-35
240752	Pik3c2b	2.035	3.42116	160.617	8.2949e-37	2.1205e-35
68263	Pdhb	1.18191	6.91265	160.365	9.41637e-37	2.4032e-35
214048	Larp1b	2.07285	3.45508	160.267	9.89211e-37	2.52044e-35
319707	C430002N11Rik	-3.93094	1.90512	160.173	1.03705e-36	2.63798e-35
14194	Fh1	1.11015	6.51356	160.081	1.08628e-36	2.75865e-35
17309	Mgat3	-1.41912	4.83278	159.823	1.23679e-36	3.13572e-35
16956	Lpl	3.35229	10.8051	159.765	1.27325e-36	3.22284e-35
26968	Islr	-1.17197	7.51983	159.686	1.32533e-36	3.34916e-35
211945	Plekhh1	2.36918	3.18684	159.466	1.47999e-36	3.73389e-35
117160	Ttyh2	1.43742	5.66204	159.434	1.5041e-36	3.78852e-35
77446	Heg1	-1.30625	7.82772	159.317	1.59538e-36	4.01186e-35
107522	Ece2	-1.44579	4.59386	159.128	1.75437e-36	4.4045e-35
17311	Kitl	1.26001	6.35688	159.105	1.77485e-36	4.44867e-35
69976	Galk2	-1.20943	5.83352	158.871	1.99656e-36	4.99627e-35
52250	Reep1	1.49983	4.62063	158.573	2.3194e-36	5.79473e-35
11479	Acvr1b	-1.25271	6.40889	158.454	2.46253e-36	6.14239e-35
56454	Aldh18a1	-1.1144	6.07899	158.442	2.47771e-36	6.17027e-35
380698	Obscn	1.49675	5.26624	158.119	2.91472e-36	7.24683e-35
16763	Lad1	6.16285	1.51116	157.781	3.4545e-36	8.57505e-35
21825	Thbs1	-1.64849	12.8171	157.403	4.17969e-36	1.03585e-34
14366	Fzd4	1.26025	6.05207	157.196	4.63759e-36	1.14749e-34
333433	Gpd1l	1.27278	5.46293	156.66	6.07271e-36	1.49859e-34
236899	Pcyt1b	-2.38595	3.20568	156.659	6.07603e-36	1.49859e-34
19716	Bex1	2.21819	3.47857	156.622	6.19189e-36	1.52473e-34
329872	Frem1	2.13842	3.27241	156.485	6.63218e-36	1.63054e-34
22393	Wfs1	1.21722	6.432	156.216	7.5956e-36	1.86443e-34
74048	Vsir	-1.41804	4.83381	156.145	7.87154e-36	1.92909e-34
233744	Spon1	3.33181	3.13892	156.028	8.34732e-36	2.04244e-34
22379	Fmnl3	-1.23521	5.86262	155.99	8.50756e-36	2.07835e-34
73102	Slc22a23	3.16327	3.47259	155.719	9.75368e-36	2.379e-34
193813	Mcfd2	-1.09086	6.90027	155.589	1.04105e-35	2.5352e-34
69553	Ripor3	-1.54893	4.70023	155.472	1.10413e-35	2.68456e-34
11428	Aco1	1.50896	7.25939	155.339	1.18068e-35	2.86618e-34
14314	Fstl1	-1.2813	11.0261	155.283	1.21453e-35	2.94371e-34
12292	Cacna1s	1.30578	5.02162	155.002	1.39877e-35	3.38494e-34
13644	Efs	2.00835	4.60383	154.715	1.61611e-35	3.90475e-34
13835	Epha1	-2.94734	4.01028	154.675	1.64909e-35	3.9782e-34
19679	Pitpnm2	1.33487	5.49249	154.628	1.68859e-35	4.06712e-34
12977	Csf1	-1.18387	9.15315	154.148	2.14989e-35	5.17013e-34
497097	Xkr4	-4.30977	1.88559	153.739	2.64087e-35	6.34097e-34
67621	Bend5	2.56059	3.00848	153.706	2.68461e-35	6.43595e-34
434215	Lrrc32	1.24425	8.07312	153.145	3.56123e-35	8.52428e-34
14585	Gfra1	-1.60069	7.07667	153.045	3.74557e-35	8.95162e-34
94040	Clmn	-1.06929	6.86703	152.982	3.86625e-35	9.22573e-34
245381	Sowahd	7.71876	1.02415	152.914	4.00076e-35	9.53195e-34
14265	Fmr1	1.23615	7.1125	152.91	4.0075e-35	9.53328e-34
14584	Gfpt2	-1.80151	4.57488	152.905	4.01774e-35	9.5429e-34
230971	Megf6	-1.92951	5.88952	152.893	4.04284e-35	9.58776e-34
11981	Atp9a	1.22023	5.80588	152.134	5.9236e-35	1.40265e-33
11496	Adam22	2.36947	2.93778	151.891	6.69344e-35	1.58251e-33
235086	Igsf9b	5.01368	1.90501	151.745	7.20482e-35	1.7008e-33
102442	Dennd4a	-1.2465	5.51909	151.716	7.31031e-35	1.72307e-33
11639	Ak4	-1.3892	5.54538	151.083	1.00532e-34	2.36596e-33
26938	St6galnac5	3.87111	2.26701	151.017	1.0393e-34	2.44221e-33
100534287	Dchs2	2.73792	2.43262	150.92	1.09136e-34	2.56062e-33
54667	Atp8b2	-1.06591	7.29851	150.829	1.1423e-34	2.67607e-33
26358	Aldh1a7	1.50973	7.6329	150.8	1.15888e-34	2.71079e-33
72301	Shisal1	2.89421	3.42066	150.752	1.18738e-34	2.77324e-33
83453	Chrdl1	1.98333	5.52783	150.714	1.21009e-34	2.82202e-33
15205	Hes1	1.48771	5.14116	150.273	1.51108e-34	3.5137e-33
320508	Cachd1	1.46778	5.1922	150.273	1.51125e-34	3.5137e-33
214791	Sertad4	-1.21153	5.84102	150.038	1.70088e-34	3.94865e-33
18208	Ntn1	1.39641	5.81188	149.924	1.8009e-34	4.17457e-33
76884	Cyfip2	2.81636	3.7263	149.849	1.87095e-34	4.33042e-33
13405	Dmd	1.5826	5.01568	149.75	1.96656e-34	4.54491e-33
11364	Acadm	1.2682	6.82106	149.211	2.57909e-34	5.95159e-33
14872	Gstt2	2.13254	3.61175	148.991	2.88072e-34	6.63771e-33
68016	Cavin4	1.21676	5.52798	148.979	2.89834e-34	6.66834e-33
20363	Selenop	1.13974	8.98024	148.016	4.7069e-34	1.08132e-32
227325	Dner	3.98409	2.18651	147.902	4.98494e-34	1.14349e-32
11449	Chrng	1.42585	5.72555	147.729	5.43607e-34	1.24513e-32
14048	Eya1	2.12586	3.25051	147.712	5.48294e-34	1.254e-32
268903	Nrip1	1.3075	6.12575	147.611	5.77059e-34	1.31783e-32
72709	C1qtnf6	-1.23016	5.76199	147.388	6.45529e-34	1.47202e-32
215031	Vgll2	3.88605	1.75202	147.363	6.53664e-34	1.48836e-32
66469	Prxl2b	1.85494	4.28895	147.23	6.99095e-34	1.58946e-32
14871	Gstt1	1.26468	5.33564	147.184	7.15277e-34	1.62386e-32
269389	Tox2	4.5812	1.56538	147.071	7.57371e-34	1.71689e-32
16190	Il4ra	-1.45696	7.46711	146.986	7.90454e-34	1.78926e-32
230824	Grhl3	7.62945	0.962238	146.941	8.08553e-34	1.82754e-32
16500	Kcnb1	2.27273	2.88093	146.89	8.2961e-34	1.87239e-32
70375	Ica1l	3.64805	2.00971	146.767	8.82381e-34	1.98858e-32
227612	Tor4a	-1.16006	5.3279	146.389	1.06758e-33	2.40244e-32
18845	Plxna2	1.18938	6.24349	145.446	1.71584e-33	3.85564e-32
64817	Svep1	-1.62382	10.1128	145.295	1.85114e-33	4.1536e-32
76509	Plet1	6.96234	1.50186	145.292	1.85395e-33	4.15387e-32
56722	Litaf	-1.16682	7.24071	145.053	2.09088e-33	4.67792e-32
235435	Lctl	4.54447	1.31757	144.958	2.19323e-33	4.89981e-32
14218	Sh3pxd2a	1.48772	9.91273	144.89	2.26957e-33	5.06301e-32
20442	St3gal1	1.1977	7.24004	144.594	2.63498e-33	5.86967e-32
76199	Med13l	-1.15491	7.71748	144.503	2.75815e-33	6.13519e-32
50934	Slc7a8	2.05545	3.86142	144.484	2.78458e-33	6.18506e-32
11647	Alpl	2.16651	2.93101	144.165	3.27051e-33	7.25393e-32
236920	Stard8	-1.27976	5.49749	144.016	3.52408e-33	7.80513e-32
231134	Dok7	2.3419	3.25761	143.649	4.23996e-33	9.37719e-32
56496	Tspan6	-1.40667	7.14409	143.488	4.59676e-33	1.01517e-31
76561	Snx7	-1.31103	5.4092	143.387	4.83811e-33	1.06694e-31
71345	Ano9	8.25298	0.934191	143.274	5.12106e-33	1.12773e-31
105005	Lratd1	2.13075	3.95587	143.202	5.31033e-33	1.16774e-31
22228	Ucp2	2.43366	4.49918	142.432	7.82263e-33	1.71775e-31
93677	Lmod2	1.68788	4.36397	142.127	9.12414e-33	2.00069e-31
11761	Aox1	1.52445	5.22794	141.811	1.06961e-32	2.34204e-31
240131	Lrrc30	5.80107	1.35318	141.785	1.08367e-32	2.36947e-31
89867	Sec16b	-1.40245	4.69372	141.716	1.12219e-32	2.45023e-31
28250	Slco1a4	2.61027	3.01122	141.223	1.43841e-32	3.13623e-31
83397	Akap12	1.0691	7.89843	141.184	1.46686e-32	3.19039e-31
72416	Lrpprc	1.11243	6.28661	141.183	1.46739e-32	3.19039e-31
68458	Ppp1r14a	3.41732	2.65824	141.047	1.57123e-32	3.41133e-31
245527	Eda2r	1.27215	4.98985	140.427	2.14729e-32	4.65548e-31
14866	Gstm5	-1.05806	5.84571	140.417	2.15816e-32	4.67247e-31
12834	Col6a2	1.0874	10.1631	140.162	2.45361e-32	5.30468e-31
12555	Cdh15	1.73426	3.99047	140.086	2.54964e-32	5.50457e-31
66445	Cyc1	1.55266	6.90004	139.903	2.79546e-32	6.02685e-31
192678	Rassf3	1.13535	5.60945	139.781	2.9722e-32	6.39894e-31
18479	Pak1	-1.2879	5.29413	139.75	3.01916e-32	6.49099e-31
74340	Ahcyl2	1.09393	5.81188	139.73	3.04898e-32	6.54596e-31
12038	Bche	7.56791	0.885245	139.687	3.11643e-32	6.68147e-31
69697	Camsap3	3.04291	2.31455	139.575	3.29747e-32	7.05979e-31
50795	Sh3bgr	3.67961	2.53416	139.486	3.44916e-32	7.37431e-31
319875	Tmprss11b	9.77328	0.791599	139.407	3.5892e-32	7.66309e-31
17449	Mdh1	1.34464	7.75035	139.317	3.75532e-32	8.00668e-31
51797	Ctps	-1.02224	6.81931	139.233	3.91722e-32	8.34031e-31
17691	Sik1	1.56535	5.58752	139.196	3.99102e-32	8.48574e-31
382034	Gse1	1.33439	5.01111	138.722	5.06606e-32	1.07567e-30
14073	Faah	-1.6969	4.64048	138.641	5.2759e-32	1.11868e-30
80888	Hspb8	1.21105	7.50835	138.551	5.52147e-32	1.16914e-30
71690	Esm1	2.99531	2.68698	138.433	5.86109e-32	1.23935e-30
17928	Myog	1.16934	5.7726	138.156	6.73802e-32	1.42283e-30
382571	Kcnf1	4.64097	3.20104	138.03	7.17897e-32	1.51387e-30
67533	Ppfibp1	-1.08087	8.03093	137.946	7.48863e-32	1.57701e-30
14705	Bscl2	1.27751	6.40603	137.852	7.85221e-32	1.65132e-30
11740	Slc25a5	1.40163	8.04363	137.816	7.99717e-32	1.67952e-30
108958	Miga2	1.37759	5.77455	137.599	8.91885e-32	1.87053e-30
116746	Defb6	9.7868	0.82319	137.326	1.02339e-31	2.14342e-30
17240	Mdfi	-1.91087	3.48358	136.947	1.2387e-31	2.59085e-30
11624	Ahrr	3.33654	3.03418	136.806	1.32938e-31	2.77675e-30
140792	Colec12	-1.35474	9.16523	136.747	1.36995e-31	2.85761e-30
15901	Id1	1.39518	6.72773	136.685	1.41325e-31	2.94396e-30
74165	Fbxl22	2.5277	2.95107	136.663	1.42861e-31	2.97193e-30
11770	Fabp4	6.97376	9.10981	136.64	1.44521e-31	3.00242e-30
98878	Ehd4	1.2138	5.99034	136.631	1.45229e-31	3.01307e-30
17877	Myf5	7.52872	0.886049	136.331	1.68865e-31	3.49872e-30
22340	Vegfb	1.14462	5.58044	136.26	1.75021e-31	3.62141e-30
15951	Ifi204	-2.1007	4.6989	135.44	2.64581e-31	5.46718e-30
13730	Emp1	-1.12318	8.27312	135.416	2.67817e-31	5.52663e-30
16005	Igfals	3.2794	2.89106	134.894	3.48272e-31	7.17728e-30
67273	Ndufa10	1.10483	6.69697	134.732	3.77913e-31	7.77775e-30
19735	Rgs2	4.22037	6.15013	134.692	3.85645e-31	7.92629e-30
94242	Tinagl1	1.11033	6.43162	134.637	3.96435e-31	8.1372e-30
17075	Epcam	4.90496	1.7805	134.191	4.96367e-31	1.01749e-29
17721	ND5	1.08401	11.5866	134.187	4.97165e-31	1.01777e-29
237860	Ssh2	1.28576	6.07435	134.008	5.4419e-31	1.11256e-29
18795	Plcb1	1.39176	4.31255	133.773	6.12427e-31	1.25041e-29
319974	Auts2	1.15639	5.87977	133.712	6.31771e-31	1.28819e-29
14051	Eya4	-1.39805	4.77488	133.621	6.61406e-31	1.34684e-29
19876	Robo1	-1.3167	5.04937	133.479	7.10248e-31	1.44439e-29
233246	Ano5	2.19734	4.1485	133.281	7.84747e-31	1.59379e-29
231997	Fkbp14	-1.20704	5.70258	133.218	8.10239e-31	1.6434e-29
17386	Mmp13	2.9462	4.46158	132.678	1.06347e-30	2.1542e-29
11363	Acadl	1.41436	7.18077	132.672	1.06665e-30	2.1578e-29
54725	Cadm1	3.29131	2.3067	132.665	1.07057e-30	2.16288e-29
19242	Ptn	1.16293	7.43216	132.558	1.12982e-30	2.27961e-29
12715	Ckm	3.40025	2.3303	132.461	1.1863e-30	2.39043e-29
94190	Ophn1	1.76075	5.03752	132.406	1.21949e-30	2.4541e-29
14863	Gstm2	-1.00463	6.32787	132.025	1.47755e-30	2.96954e-29
67512	Agpat2	3.08967	6.40108	132	1.49649e-30	3.00369e-29
56264	Cpxm1	-1.46935	6.27554	131.971	1.51843e-30	3.04377e-29
19301	Pxmp2	4.3876	2.58259	131.505	1.9202e-30	3.84414e-29
16364	Irf4	6.61641	1.4989	131.027	2.44281e-30	4.88403e-29
68465	Adipor2	2.25199	7.60141	130.712	2.86225e-30	5.71523e-29
66139	Mymk	1.39204	6.15686	130.611	3.0115e-30	6.00546e-29
77940	A930004D18Rik	-1.68081	3.47107	130.58	3.05908e-30	6.09247e-29
13731	Emp2	-1.01151	7.00769	130.485	3.21008e-30	6.38495e-29
225443	Gm94	9.67175	0.700331	130.422	3.31356e-30	6.58229e-29
320910	Itgb8	-1.44505	4.64567	130.36	3.41854e-30	6.78208e-29
17878	Myf6	3.98043	2.8831	130.221	3.66585e-30	7.26337e-29
11423	Ache	2.22337	3.12673	129.854	4.41081e-30	8.72819e-29
12797	Cnn1	1.35951	7.63559	129.797	4.53951e-30	8.97135e-29
18414	Osmr	-1.36684	8.43197	129.487	5.30753e-30	1.04757e-28
21923	Tnc	-2.13962	8.70312	129.442	5.42666e-30	1.06972e-28
17716	ND1	1.23914	11.3637	129.395	5.55918e-30	1.09444e-28
74365	Lonrf3	2.61579	2.74476	129.328	5.74963e-30	1.13049e-28
20725	Serpinb8	1.96041	3.68801	129.231	6.03799e-30	1.18568e-28
98396	Slc41a1	-0.976015	6.1789	129.217	6.08042e-30	1.19182e-28
16504	Kcnc3	2.88174	2.46652	129.215	6.08472e-30	1.19182e-28
320253	Marchf3	-1.19217	5.04858	129.145	6.30304e-30	1.23301e-28
13808	Eno3	1.12475	6.08551	129.1	6.4479e-30	1.25975e-28
100604	Lrrc8c	-1.61953	5.30548	129.041	6.64203e-30	1.29604e-28
58208	Bcl11b	2.87597	2.78066	128.827	7.40021e-30	1.44215e-28
170439	Elovl6	1.11202	5.73476	128.665	8.02689e-30	1.5623e-28
14183	Fgfr2	1.18482	8.32082	128.603	8.28289e-30	1.6101e-28
77583	Notum	4.26111	1.3815	128.343	9.44363e-30	1.83342e-28
13385	Dlg4	-1.08917	5.55235	128.326	9.52642e-30	1.84717e-28
66218	Ndufb9	1.1032	6.25895	128.229	9.99929e-30	1.93642e-28
380928	Lmo7	1.18278	7.28668	127.958	1.14638e-29	2.21724e-28
75723	Amotl1	1.01145	8.36276	127.88	1.19236e-29	2.30328e-28
22793	Zyx	-1.26234	8.8268	127.812	1.23404e-29	2.38081e-28
50527	Ero1a	-1.2098	6.64366	127.769	1.26071e-29	2.42922e-28
215632	Psd4	1.33285	4.74098	127.721	1.29203e-29	2.48647e-28
14230	Fkbp10	-0.967472	7.10276	127.443	1.48573e-29	2.85567e-28
21943	Tnfsf11	-2.08898	3.26096	127.396	1.52144e-29	2.92067e-28
17347	Mknk2	1.88672	7.5858	127.363	1.54689e-29	2.96584e-28
56050	Cyp39a1	-1.9109	3.73804	127.286	1.60803e-29	3.07922e-28
56012	Pgam2	1.56639	4.50458	127.201	1.67853e-29	3.21024e-28
19258	Ptpn4	1.24245	5.44038	127.138	1.7329e-29	3.31013e-28
98660	Atp1a2	3.55639	6.44907	127.064	1.79914e-29	3.4324e-28
17722	ND6	1.01768	9.42615	126.693	2.16846e-29	4.13187e-28
54324	Arhgef5	-1.24643	4.75686	126.216	2.75821e-29	5.24912e-28
12491	Cd36	6.81466	7.09851	126.172	2.81913e-29	5.35844e-28
19241	Tmsb4x	1.16474	9.75692	126.123	2.89055e-29	5.48741e-28
242705	E2f2	2.14414	3.11219	125.73	3.52259e-29	6.67905e-28
229003	Helz2	-1.31027	5.74605	125.664	3.64203e-29	6.89705e-28
22235	Ugdh	-1.00074	7.10712	125.64	3.68708e-29	6.97378e-28
70423	Tspan15	2.81105	2.06473	125.579	3.80127e-29	7.18096e-28
76905	Lrg1	2.00102	3.31388	125.521	3.91444e-29	7.38568e-28
80797	Clca3a2	4.20784	1.40874	125.513	3.92941e-29	7.40486e-28
12162	Bmp7	6.1519	1.7238	125.294	4.38954e-29	8.26187e-28
54409	Ramp2	2.48586	3.42216	124.913	5.31741e-29	9.99609e-28
14586	Gfra2	1.60744	6.62102	124.876	5.41771e-29	1.0165e-27
208647	Creb3l2	-0.964626	7.14778	124.875	5.42046e-29	1.0165e-27
16008	Igfbp2	-1.14339	10.8743	124.762	5.73725e-29	1.0746e-27
108655	Foxp1	-1.16945	6.29724	124.685	5.96592e-29	1.11608e-27
17992	Ndufa4	1.22033	6.44104	124.64	6.10117e-29	1.13999e-27
20678	Sox5	-1.64059	3.62937	124.535	6.43328e-29	1.19944e-27
14254	Flt1	2.31147	2.85896	124.535	6.43489e-29	1.19944e-27
53623	Gria3	-1.15912	5.45469	124.475	6.63168e-29	1.23463e-27
194126	Mtmr11	-1.84562	3.26904	124.098	8.01882e-29	1.49108e-27
68939	Rasl11b	1.56457	4.58665	124.009	8.38466e-29	1.55722e-27
170829	Tram2	-1.17009	5.46419	123.831	9.17533e-29	1.70202e-27
67703	Kirrel3	-1.87713	4.03315	123.814	9.25233e-29	1.71424e-27
13527	Dtna	1.39547	4.86731	123.484	1.09274e-28	2.02215e-27
11937	Atp2a1	1.43517	6.91544	123.19	1.26705e-28	2.34191e-27
226777	C130074G19Rik	2.98355	2.77164	122.98	1.40843e-28	2.60011e-27
54447	Asah2	-1.32416	5.30985	122.889	1.47446e-28	2.71876e-27
68133	Gcsh	1.14204	5.59679	122.756	1.5768e-28	2.90399e-27
12040	Bckdhb	1.43662	4.48902	122.715	1.60986e-28	2.96134e-27
23850	Pappa2	-1.67494	3.89602	122.6	1.70593e-28	3.13432e-27
107831	Adgrb1	4.74305	1.53936	122.384	1.90252e-28	3.49135e-27
67680	Sdhb	1.11245	6.5863	122.247	2.03833e-28	3.73613e-27
18578	Pde4b	-1.44214	5.28233	121.918	2.40519e-28	4.40333e-27
93708	Pcdhgc5	-1.68601	3.88059	121.875	2.4579e-28	4.49449e-27
110821	Pcca	1.18432	5.4695	121.664	2.73398e-28	4.9934e-27
239102	Zfhx2	1.91623	3.46844	121.408	3.11073e-28	5.67479e-27
19017	Ppargc1a	3.86125	2.74024	121.351	3.2014e-28	5.83328e-27
19659	Rbp1	1.0877	5.32425	121.01	3.80222e-28	6.91986e-27
18671	Abcb1a	2.20681	2.88694	120.96	3.89852e-28	7.08675e-27
57339	Jph1	1.46945	3.95637	120.905	4.00958e-28	7.28006e-27
12291	Cacna1g	-1.10541	5.86673	120.559	4.77292e-28	8.65583e-27
12824	Col2a1	-4.45754	7.59364	120.16	5.8349e-28	1.05693e-26
399603	Lratd2	2.74125	2.12577	120.069	6.10923e-28	1.10533e-26
108154	Adamts6	-2.02179	5.26949	120.024	6.25084e-28	1.12962e-26
18633	Pex16	1.71864	4.45831	119.909	6.6234e-28	1.19555e-26
320502	Lmod3	1.30946	4.65661	119.646	7.56106e-28	1.3632e-26
11429	Aco2	1.25734	8.28518	119.387	8.61604e-28	1.55159e-26
246293	Klhl8	1.58782	3.79942	119.321	8.90708e-28	1.60213e-26
12359	Cat	1.32038	8.44266	119	1.04739e-27	1.88176e-26
68659	Gask1b	-1.19401	6.58997	118.989	1.05321e-27	1.89002e-26
56421	Pfkp	-1.00356	6.3472	118.967	1.06475e-27	1.90851e-26
68802	Mypn	1.98487	3.82897	118.645	1.25253e-27	2.24249e-26
70717	Medag	-1.17811	6.31524	118.501	1.34697e-27	2.40877e-26
70885	Ints10	1.07779	5.41314	118.471	1.36771e-27	2.44303e-26
12411	Cbs	3.22899	2.71404	118.462	1.37353e-27	2.45057e-26
22411	Wnt11	2.56729	2.76669	118.339	1.46142e-27	2.60436e-26
207798	Gramd1c	-2.01456	2.86062	118.212	1.55837e-27	2.77394e-26
12299	Cacng1	1.62463	3.57455	117.602	2.11902e-27	3.76756e-26
15464	Hrc	1.57879	4.1098	117.523	2.20481e-27	3.91557e-26
17711	CYTB	1.23558	11.9762	117.472	2.26231e-27	4.01305e-26
104111	Adcy3	-1.07622	5.07967	117.312	2.45305e-27	4.34641e-26
66694	Uqcrfs1	1.30717	6.7393	116.986	2.89111e-27	5.1167e-26
98845	Eps8l2	-2.73515	3.37513	116.814	3.15219e-27	5.57236e-26
242083	Ppm1l	1.42742	3.96052	116.693	3.35116e-27	5.91732e-26
56526	Septin6	1.2193	4.94391	116.678	3.37697e-27	5.95606e-26
54670	Atp8b1	1.20606	5.51432	116.64	3.44146e-27	6.06287e-26
21942	Tnfrsf9	-3.12607	1.90729	116.623	3.47163e-27	6.10904e-26
72181	Nsun4	-1.28129	4.60712	116.539	3.62267e-27	6.36756e-26
70673	Prdm16	1.21764	4.98561	116.493	3.70772e-27	6.50962e-26
216161	Sbno2	-0.939773	7.07904	116.264	4.16149e-27	7.29799e-26
12740	Cldn4	5.72208	1.50092	116.244	4.20199e-27	7.36065e-26
78286	Nav2	0.984714	6.15543	116.204	4.28823e-27	7.50319e-26
76441	Daam2	0.998786	6.12644	116.181	4.33858e-27	7.58268e-26
72269	Cda	-4.54362	1.4462	116.121	4.47112e-27	7.80548e-26
67895	Ppa1	2.38637	6.97772	115.851	5.12305e-27	8.93346e-26
15107	Hadh	1.19057	6.5873	115.728	5.45263e-27	9.49743e-26
100043946	Gm14635	1.79653	3.36535	115.629	5.73101e-27	9.97106e-26
54195	Gucy1b1	4.46349	1.61192	115.531	6.02151e-27	1.04647e-25
18772	Pkp1	3.3909	3.93803	115.393	6.45586e-27	1.12069e-25
20754	Sprr1b	9.44142	0.466055	115.216	7.059e-27	1.22401e-25
17189	Mb	1.49523	4.81983	115.163	7.24936e-27	1.25561e-25
208994	Fam83b	9.45819	0.495672	115.089	7.5251e-27	1.3019e-25
66106	Smpx	1.3315	4.45372	114.67	9.29338e-27	1.60603e-25
12364	Casp12	-1.03637	6.03562	114.488	1.01894e-26	1.75889e-25
237886	Slfn9	-1.42055	4.15922	114.466	1.03027e-26	1.77647e-25
14622	Gjb5	-3.40249	1.88564	114.299	1.12055e-26	1.92997e-25
13346	Des	1.20594	8.19338	114.216	1.16889e-26	2.01098e-25
11933	Atp1b3	0.955266	8.31604	113.895	1.37373e-26	2.36077e-25
23797	Akt3	-1.05657	5.13415	113.887	1.37947e-26	2.368e-25
232441	Rerg	2.21512	2.73904	113.805	1.43804e-26	2.46577e-25
67914	Coq9	1.02108	5.89724	113.574	1.61509e-26	2.76629e-25
16425	Itih2	-2.0072	3.77826	113.559	1.62771e-26	2.78481e-25
235344	Sik2	1.9189	6.31119	113.459	1.71212e-26	2.92598e-25
209588	Sectm1a	-4.18856	2.61773	113.329	1.8275e-26	3.11971e-25
218756	Slc4a7	1.01192	5.89937	113.218	1.93301e-26	3.29617e-25
18542	Pcolce	-0.99581	9.11452	113.187	1.96351e-26	3.34448e-25
15511	Hspa1b	0.972138	5.91402	113.122	2.029e-26	3.45222e-25
67299	Dock7	-0.996086	7.78784	113.075	2.07739e-26	3.53064e-25
69219	Ddah1	-1.0438	7.31609	113.065	2.08781e-26	3.54445e-25
18476	Pafah1b3	-1.32858	4.43658	113.031	2.12446e-26	3.6027e-25
16404	Itga7	1.03629	6.52262	113.004	2.15335e-26	3.64768e-25
13382	Dld	0.986796	7.09117	112.806	2.37912e-26	4.0257e-25
22057	Tob1	1.15499	5.97947	112.671	2.54742e-26	4.30575e-25
225115	Svil	1.02481	7.75958	112.54	2.72117e-26	4.5944e-25
20970	Sdc3	-0.915682	7.2135	112.439	2.86302e-26	4.82861e-25
242022	Frem2	1.80902	3.5646	112.25	3.15022e-26	5.30718e-25
67484	Eepd1	1.67478	3.31276	112.231	3.18048e-26	5.3523e-25
13167	Dbi	1.88205	7.84942	112.221	3.19648e-26	5.37336e-25
66120	Fkbp11	-1.93046	3.91099	112.199	3.23184e-26	5.42688e-25
102644	Oaf	-1.14157	6.00159	112.16	3.29609e-26	5.52876e-25
320840	Negr1	4.94172	1.68083	112.15	3.3127e-26	5.55057e-25
54371	Chst2	0.974446	5.66415	112.068	3.45254e-26	5.77861e-25
80976	Syt13	1.04696	7.02924	111.976	3.61583e-26	6.04534e-25
16998	Ltbp3	-0.997839	8.6055	111.953	3.65793e-26	6.1091e-25
244698	Hephl1	2.06385	2.6927	111.91	3.73849e-26	6.23688e-25
11488	Adam11	1.52496	3.56194	111.79	3.97264e-26	6.62035e-25
55987	Cpxm2	-1.9231	7.81603	111.706	4.14347e-26	6.89758e-25
76469	Cmya5	1.37546	4.81307	111.597	4.37876e-26	7.2814e-25
30806	Adamts8	7.25284	0.562972	111.433	4.75725e-26	7.90226e-25
72388	Ripk4	9.35263	0.391191	111.225	5.28148e-26	8.76363e-25
11602	Angpt4	1.00342	5.4	111.038	5.80575e-26	9.62111e-25
18798	Plcb4	1.11709	6.38864	111.036	5.81074e-26	9.62111e-25
14221	Fjx1	2.17081	3.72284	111.012	5.88255e-26	9.72957e-25
233335	Synm	2.29925	3.14176	110.707	6.85871e-26	1.13319e-24
14660	Gls	-0.991266	8.11914	110.664	7.01057e-26	1.15704e-24
384071	Slc25a34	4.20889	1.6732	110.598	7.24866e-26	1.19506e-24
237553	Trhde	9.3309	0.372848	110.468	7.73754e-26	1.2743e-24
75202	Spaca6	-1.12783	5.18852	110.322	8.32905e-26	1.37025e-24
12268	C4b	-1.00864	9.83564	110.221	8.76483e-26	1.4404e-24
18858	Pmp22	-1.21211	8.35855	110.19	8.90232e-26	1.46144e-24
56774	Slc6a14	9.44786	0.497004	110.137	9.14517e-26	1.49971e-24
66775	Hacd4	-0.940042	5.75901	110.069	9.46463e-26	1.55045e-24
68810	Nexn	1.03198	5.68748	109.954	1.00301e-25	1.64133e-24
170718	Idh3b	1.08632	6.85308	109.546	1.23237e-25	2.01453e-24
16440	Itpr3	-0.989696	6.21656	109.283	1.40722e-25	2.29791e-24
84094	Plvap	2.28697	3.20849	109.008	1.61607e-25	2.63616e-24
12823	Col19a1	3.17524	2.15489	108.916	1.6935e-25	2.75955e-24
16924	Lnx1	-1.38539	5.31296	108.885	1.71995e-25	2.79968e-24
70417	Megf10	1.80518	4.03716	108.848	1.75219e-25	2.84916e-24
14027	Evpl	3.20941	1.94622	108.812	1.78407e-25	2.89794e-24
56190	Rbm38	1.76081	3.30024	108.591	1.9952e-25	3.23747e-24
18260	Ocln	9.35949	0.415386	108.497	2.09183e-25	3.3907e-24
380660	Acss3	1.738	3.62698	108.445	2.14702e-25	3.4765e-24
26364	Adgre5	1.13125	5.35261	108.102	2.55254e-25	4.12879e-24
19713	Ret	-1.48774	4.74618	108.053	2.61636e-25	4.22759e-24
15929	Idh3g	0.902488	6.76979	108.05	2.62142e-25	4.23133e-24
54611	Pde3a	1.53675	4.61878	107.938	2.77256e-25	4.47062e-24
18750	Prkca	-0.905373	6.35056	107.738	3.06741e-25	4.94087e-24
70967	Eva1c	1.73263	3.59032	107.722	3.09212e-25	4.97548e-24
18648	Pgam1	-0.937409	7.49319	107.681	3.15649e-25	5.07376e-24
69662	2310061I04Rik	1.32229	4.23222	107.585	3.31301e-25	5.3198e-24
64082	Popdc2	2.4526	2.97597	107.527	3.41282e-25	5.46979e-24
66270	Retreg1	1.53982	3.50329	107.526	3.41352e-25	5.46979e-24
110532	Adarb1	1.56625	5.04731	107.441	3.56282e-25	5.70311e-24
66109	Tspan13	1.51253	3.53368	107.227	3.96939e-25	6.34732e-24
69480	Ttc9	1.40789	4.15262	107.2	4.02411e-25	6.42816e-24
12614	Celsr1	3.19872	1.55124	107.012	4.42484e-25	7.06097e-24
68701	Ppp1r27	3.80966	1.2449	106.978	4.50139e-25	7.17568e-24
98496	Pid1	1.29479	4.20244	106.976	4.50649e-25	7.1764e-24
140570	Plxnb2	-0.999975	8.52483	106.919	4.63816e-25	7.37845e-24
67792	Rgs8	4.09811	3.76858	106.852	4.79735e-25	7.62383e-24
21835	Thrsp	8.90665	5.52967	106.821	4.87303e-25	7.73613e-24
18951	Septin5	-1.03529	5.75443	106.818	4.87876e-25	7.73726e-24
11504	Adamts1	0.966301	8.08977	106.578	5.50927e-25	8.72821e-24
12390	Cav2	1.04232	6.19914	106.573	5.52108e-25	8.73793e-24
99542	AI115009	-2.8349	1.92777	106.338	6.21708e-25	9.82937e-24
214239	Ccdc9b	-1.17287	4.64441	106.08	7.08042e-25	1.11829e-23
11988	Slc7a2	-1.43362	7.09271	106.033	7.25085e-25	1.14403e-23
16668	Krt18	4.57716	2.24372	106.028	7.27087e-25	1.14602e-23
242443	Grin3a	3.98973	1.10063	106.011	7.33286e-25	1.15461e-23
212943	Tent5a	1.08353	6.17751	105.942	7.59293e-25	1.19434e-23
22117	Tst	4.75587	4.68305	105.702	8.56838e-25	1.3464e-23
14667	Gm2a	1.01081	7.0366	105.607	8.99004e-25	1.41122e-23
13345	Twist2	1.82002	3.25713	105.377	1.00994e-24	1.58375e-23
109019	Nabp1	3.34062	7.32842	105.264	1.06897e-24	1.67445e-23
56460	Pkp3	5.86624	1.5115	105.262	1.06995e-24	1.67445e-23
209630	Frmd4a	0.930962	5.99381	105.126	1.14589e-24	1.79146e-23
53412	Ppp1r3c	-1.10331	6.74038	105.043	1.19502e-24	1.86639e-23
12864	Cox6c	0.998599	7.58886	104.996	1.2241e-24	1.90987e-23
54403	Slc4a4	2.04829	5.16784	104.734	1.39698e-24	2.17736e-23
14860	Gsta4	1.90252	2.80369	104.732	1.39837e-24	2.17736e-23
22223	Uchl1	2.23344	3.15795	104.697	1.42337e-24	2.21404e-23
75909	Vmp1	-0.989518	7.8461	104.686	1.43084e-24	2.22343e-23
26874	Abcd2	1.98963	2.98511	104.616	1.48224e-24	2.30098e-23
109880	Braf	-1.07042	6.20733	104.605	1.49117e-24	2.31251e-23
50909	C1ra	-1.0315	7.29909	104.554	1.53002e-24	2.37037e-23
13830	Stom	0.955318	6.65122	104.352	1.69402e-24	2.62182e-23
17174	Masp1	-1.11614	5.1623	104.268	1.7673e-24	2.73249e-23
53868	Rab25	5.52087	1.09631	104.229	1.80221e-24	2.78367e-23
72507	Dzip1l	-1.23134	4.6484	104.195	1.83319e-24	2.82869e-23
228846	D630003M21Rik	1.91627	3.28624	104.102	1.92173e-24	2.96235e-23
213053	Slc39a14	-1.17091	6.30733	104.059	1.9641e-24	3.02463e-23
16401	Itga4	1.77433	3.83255	104.048	1.9752e-24	3.03869e-23
227095	Hibch	1.58195	5.00856	104.044	1.97844e-24	3.04064e-23
16828	Ldha	-1.04303	10.0975	103.943	2.08215e-24	3.19684e-23
51902	Rnf24	1.06601	4.8701	103.906	2.12109e-24	3.25339e-23
50786	Hs6st2	-0.899961	7.08208	103.81	2.22652e-24	3.41171e-23
67454	Ikbip	-0.929225	6.46561	103.75	2.2957e-24	3.51423e-23
22273	Uqcrc1	0.943334	7.61008	103.733	2.31559e-24	3.54116e-23
67305	Gpx7	-1.11564	5.12658	103.643	2.42222e-24	3.70055e-23
12579	Cdkn2b	1.29494	5.2219	103.539	2.55334e-24	3.89701e-23
18263	Odc1	-0.934622	7.95584	103.526	2.57e-24	3.91856e-23
207920	Esrp1	6.53423	0.953906	103.514	2.58513e-24	3.93772e-23
15526	Hspa9	0.970106	8.30763	103.463	2.65254e-24	4.03641e-23
223775	Pim3	1.30846	6.20982	103.377	2.77059e-24	4.2119e-23
14775	Gpx1	1.1233	8.55856	103.303	2.87626e-24	4.36823e-23
14712	Gnpat	0.965496	6.69544	103.286	2.9012e-24	4.40177e-23
666048	Trabd2b	0.970465	6.28826	103.253	2.94999e-24	4.47139e-23
108888	Atad3a	1.04439	5.50422	103.212	3.01202e-24	4.56093e-23
18415	Hspa4l	1.15297	5.03813	103.209	3.01576e-24	4.56211e-23
12861	Cox6a1	0.965701	7.84841	103.001	3.35028e-24	5.06319e-23
19411	Rarg	-0.906099	6.26826	102.984	3.37782e-24	5.09981e-23
224454	Zdhhc14	2.28661	3.03141	102.977	3.39071e-24	5.11427e-23
12739	Cldn3	9.24917	0.293148	102.935	3.46337e-24	5.21875e-23
70598	Filip1	1.57914	3.70056	102.914	3.49949e-24	5.26803e-23
18741	Pitx2	1.92605	2.91315	102.907	3.51333e-24	5.2837e-23
224697	Adamts10	-0.993582	5.49731	102.645	4.00989e-24	6.0246e-23
52538	Acaa2	0.985441	5.60424	102.639	4.02144e-24	6.03608e-23
381338	Lonrf2	2.12923	2.8597	102.586	4.13024e-24	6.19336e-23
14825	Cxcl1	1.29245	4.01759	102.49	4.3359e-24	6.49542e-23
12323	Camk2b	1.82407	3.24184	102.417	4.49909e-24	6.72766e-23
170441	Slc2a10	-1.64407	3.70253	102.416	4.49965e-24	6.72766e-23
225341	Lims2	1.34159	4.48886	102.341	4.6741e-24	6.98171e-23
11603	Agrn	-1.0225	7.77052	102.317	4.73117e-24	7.06011e-23
103743	Tmem98	-1.08924	6.2756	102.223	4.96167e-24	7.39692e-23
70316	Ndufab1	1.03814	6.37287	102.168	5.10062e-24	7.59672e-23
15245	Hhip	2.34939	2.76033	101.991	5.57632e-24	8.29046e-23
70747	Tspan2	1.72237	3.90306	101.991	5.57717e-24	8.29046e-23
319387	Adgrl3	-1.69413	3.13947	101.943	5.71408e-24	8.48579e-23
17708	COX1	0.974641	13.4113	101.751	6.29679e-24	9.34215e-23
27494	Amot	1.02602	6.33814	101.694	6.47858e-24	9.60262e-23
26877	B3galt1	2.06782	2.90662	101.667	6.567e-24	9.72433e-23
22153	Tubb4a	4.39826	1.12947	101.569	6.90306e-24	1.02121e-22
11717	Ampd3	-0.957745	5.6542	101.53	7.03906e-24	1.03975e-22
21957	Tnnt3	1.39447	6.80508	101.529	7.04183e-24	1.03975e-22
22268	Upk1b	6.30913	0.479839	101.47	7.25395e-24	1.07004e-22
319880	Tmcc3	1.5107	5.53501	101.437	7.37591e-24	1.08699e-22
244654	Mtss2	1.05175	8.03938	101.39	7.55341e-24	1.11209e-22
237858	Trarg1	6.00242	0.685041	101.349	7.71112e-24	1.13423e-22
20503	Slc16a7	2.19607	2.56355	101.246	8.12401e-24	1.19382e-22
394435	Ugt1a6b	3.033	1.61585	101.072	8.87153e-24	1.30243e-22
14782	Gsr	1.05852	5.01098	100.996	9.21865e-24	1.35087e-22
70152	Mettl7a1	1.05534	6.46347	100.996	9.21905e-24	1.35087e-22
22437	Xirp1	1.42043	4.31365	100.909	9.62919e-24	1.40963e-22
252864	Dusp15	4.21217	1.07802	100.876	9.79023e-24	1.43184e-22
16194	Il6ra	-1.56916	3.67063	100.867	9.83724e-24	1.43736e-22
57444	Isg20	-2.29198	3.4292	100.626	1.1111e-23	1.62193e-22
14799	Gria1	2.57979	3.6934	100.521	1.17172e-23	1.70881e-22
75599	Pcdh1	1.73747	4.09584	100.482	1.19482e-23	1.74085e-22
19252	Dusp1	0.941845	5.8247	100.472	1.20092e-23	1.74808e-22
64058	Perp	3.32394	4.66229	100.449	1.21506e-23	1.767e-22
626834	Klk13	7.14386	0.459261	100.389	1.25199e-23	1.81898e-22
52187	Rragd	1.68655	3.15396	100.332	1.28847e-23	1.87023e-22
12156	Bmp2	2.16638	2.47801	100.036	1.49643e-23	2.17003e-22
242466	Zfp462	-1.0895	5.73861	100.021	1.50759e-23	2.18416e-22
234072	Adprhl1	2.05171	2.54044	100.007	1.51879e-23	2.19833e-22
66402	Sln	2.60245	2.16845	99.982	1.53791e-23	2.22391e-22
20514	Slc1a5	1.61315	8.13805	99.961	1.55431e-23	2.24552e-22
214523	Tmprss4	9.17722	0.218367	99.846	1.6472e-23	2.37749e-22
381157	Greb1l	-1.60454	3.47485	99.774	1.70816e-23	2.46317e-22
235534	Pxylp1	-1.26144	4.17479	99.7278	1.7485e-23	2.51899e-22
19041	Ppl	1.60784	4.27495	99.642	1.82594e-23	2.6281e-22
56198	Heyl	5.29255	2.11372	99.599	1.86596e-23	2.68319e-22
207215	Fbxo40	2.8219	1.65813	99.4552	2.00647e-23	2.88255e-22
72136	Chst14	-1.04713	5.37574	99.3027	2.16715e-23	3.11049e-22
20652	Soat1	-1.06426	6.23412	99.1897	2.29434e-23	3.28998e-22
329828	Myorg	1.13101	5.44774	99.1309	2.36348e-23	3.38598e-22
12974	Cs	1.27213	8.42733	99.089	2.41403e-23	3.45518e-22
217517	Stxbp6	1.3572	4.71198	98.9984	2.52711e-23	3.61368e-22
18186	Nrp1	0.863303	8.16621	98.9743	2.55804e-23	3.65451e-22
13591	Ebf1	0.899132	7.77592	98.896	2.66115e-23	3.7983e-22
19294	Nectin2	-0.939439	5.55135	98.8899	2.66944e-23	3.8066e-22
634650	Gbp11	5.11839	1.11922	98.864	2.70449e-23	3.85302e-22
240327	Gm4951	1.46646	3.64931	98.804	2.78772e-23	3.96527e-22
51800	Bok	2.01986	4.4294	98.8035	2.78842e-23	3.96527e-22
319655	Podxl2	1.06148	5.27056	98.694	2.9469e-23	4.18676e-22
58188	Vstm2b	7.0888	0.462584	98.3104	3.57691e-23	5.07718e-22
22776	Zim1	1.73817	3.18014	98.1456	3.88716e-23	5.51248e-22
73173	Pcdh18	-0.900283	6.28539	97.9963	4.19159e-23	5.93873e-22
16832	Ldhb	0.871956	7.32212	97.9768	4.23314e-23	5.99209e-22
18196	Nsg1	-1.062	5.95696	97.7097	4.8444e-23	6.85105e-22
17133	Maff	-1.30976	3.93861	97.7059	4.85367e-23	6.85786e-22
73822	Mfsd12	2.0185	4.81113	97.6345	5.03208e-23	7.10343e-22
329251	Ppp1r12b	1.04859	6.82198	97.6199	5.06925e-23	7.14936e-22
194401	Mical3	1.0933	5.57662	97.5842	5.16133e-23	7.27257e-22
108099	Prkag2	1.48765	5.27568	97.5387	5.28139e-23	7.43495e-22
76614	Immt	0.902484	7.29642	97.4068	5.64515e-23	7.93978e-22
14651	Hagh	1.25284	4.73789	97.3544	5.7966e-23	8.14536e-22
56016	Hebp2	-1.26105	3.98615	97.3159	5.91039e-23	8.29769e-22
23943	Esyt1	1.02486	7.23508	97.3044	5.94482e-23	8.33844e-22
63873	Trpv4	-1.82765	2.94349	97.1918	6.29279e-23	8.81848e-22
64095	Gpr35	-2.0858	2.60065	97.1617	6.38919e-23	8.94544e-22
215512	Fam117a	1.61988	4.10373	97.1063	6.57025e-23	9.1906e-22
50784	Plpp2	-1.5337	3.96299	97.0554	6.74153e-23	9.42165e-22
100201	Tmem64	0.851142	6.76227	96.9207	7.21596e-23	1.00674e-21
13608	Edar	-2.48764	2.46297	96.9205	7.21664e-23	1.00674e-21
216848	Chd3	-0.915554	7.76965	96.6569	8.24438e-23	1.14907e-21
20393	Sgk1	-1.49093	6.38709	96.5465	8.7171e-23	1.21386e-21
19128	Pros1	-1.34089	7.34565	96.4743	9.0408e-23	1.2578e-21
101488	Slco2b1	9.1332	0.168709	96.4661	9.07855e-23	1.26191e-21
241303	Fam78a	2.40482	2.57023	96.4068	9.35474e-23	1.29913e-21
73095	Slc25a42	1.26914	4.33206	96.3508	9.62271e-23	1.33514e-21
78896	Ecrg4	0.959619	9.18746	96.278	9.98311e-23	1.3839e-21
78920	Dlst	0.916794	7.41748	96.1147	1.08415e-22	1.50155e-21
15484	Hsd11b2	4.48845	1.46076	96.1092	1.08719e-22	1.5044e-21
18600	Padi2	4.08164	2.73016	95.9998	1.14895e-22	1.58844e-21
108075	Ltbp4	0.881808	7.04713	95.8293	1.25226e-22	1.72971e-21
22715	Zfp57	-1.27704	4.20972	95.7343	1.31386e-22	1.81317e-21
15368	Hmox1	-0.92479	6.53066	95.4947	1.48291e-22	2.04463e-21
246277	Csad	0.913323	6.51172	95.2931	1.64182e-22	2.26172e-21
68404	Nrn1	2.01705	5.11368	95.2644	1.66585e-22	2.29277e-21
216616	Efemp1	1.04	9.36118	95.2308	1.69434e-22	2.3299e-21
15510	Hspd1	1.12602	8.16048	95.111	1.80002e-22	2.47303e-21
21351	Taldo1	1.09462	6.97126	95.0096	1.89466e-22	2.60073e-21
57437	Golga7	-0.911676	6.69821	94.9221	1.98028e-22	2.71584e-21
232670	Tspan33	2.9006	2.02849	94.8467	2.05711e-22	2.8187e-21
50720	Sacs	1.02584	5.49104	94.7771	2.13076e-22	2.91702e-21
14431	Gamt	1.36639	3.65911	94.7734	2.13475e-22	2.91989e-21
16774	Lama3	3.37141	1.38668	94.6508	2.27114e-22	3.10369e-21
20525	Slc2a1	-1.15188	7.05658	94.5917	2.33997e-22	3.19492e-21
76820	Cyria	1.94523	3.36865	94.5258	2.41924e-22	3.30023e-21
28169	Agpat3	0.926401	6.75857	94.4759	2.4809e-22	3.38135e-21
11430	Acox1	1.28619	7.66194	94.4455	2.51938e-22	3.43076e-21
13602	Sparcl1	2.90063	2.31737	94.4299	2.53932e-22	3.45486e-21
66108	Ndufa9	0.898462	6.25518	94.4239	2.54701e-22	3.46227e-21
57257	Vav3	1.97015	2.61688	94.3354	2.66346e-22	3.61738e-21
12908	Crat	1.04092	6.4075	94.2977	2.71467e-22	3.6812e-21
12227	Btg2	1.03116	5.26297	94.2973	2.71523e-22	3.6812e-21
55948	Sfn	2.98184	3.79587	94.2838	2.73384e-22	3.70318e-21
12494	Cd38	-3.93197	2.56504	94.2322	2.80599e-22	3.79757e-21
102103	Mtus1	1.22122	6.01083	94.1814	2.87889e-22	3.89281e-21
12398	Cbfa2t3	3.16511	1.82863	94.1398	2.94007e-22	3.97205e-21
12022	Barx1	-1.36338	3.59877	93.9777	3.19098e-22	4.30727e-21
67283	Slc25a19	1.38198	4.38942	93.9735	3.19771e-22	4.31257e-21
386463	Cdsn	3.20495	3.88886	93.8358	3.42815e-22	4.61931e-21
53324	Nptx2	3.103	1.52428	93.8064	3.47938e-22	4.68425e-21
15258	Hipk2	1.47637	6.00456	93.7914	3.50593e-22	4.71588e-21
72297	B3gnt3	-2.59858	2.27069	93.7096	3.65392e-22	4.91065e-21
72033	Tsc22d2	-0.823305	6.63214	93.6237	3.81586e-22	5.12382e-21
56847	Aldh1a3	2.40693	2.63862	93.4367	4.19401e-22	5.62669e-21
18484	Pam	-0.8504	9.17193	93.0726	5.0411e-22	6.75726e-21
72823	Pard3b	1.13379	4.75	93.0092	5.20525e-22	6.97124e-21
73750	Whrn	1.96785	3.55865	92.8959	5.51176e-22	7.37533e-21
227197	Ndufs1	0.95297	6.59797	92.8317	5.69349e-22	7.61189e-21
268515	Bahcc1	1.09427	6.82926	92.7453	5.94766e-22	7.94482e-21
52357	Wwc2	-0.836434	6.47045	92.5808	6.46304e-22	8.62579e-21
56277	Tmem45a	-1.78979	6.50913	92.513	6.68845e-22	8.9189e-21
22403	Ccn5	-0.86371	9.25507	92.4751	6.81775e-22	9.08346e-21
16582	Kifc3	-0.974757	5.19625	92.4593	6.87224e-22	9.14815e-21
11830	Aqp5	2.09239	3.43799	92.4365	6.95215e-22	9.24654e-21
69146	Gsdmd	-1.21381	4.65902	92.3363	7.31318e-22	9.71834e-21
70456	Mpc2	0.907739	6.04479	92.2865	7.49957e-22	9.95744e-21
268932	Caskin1	2.42423	2.3105	92.1659	7.97064e-22	1.05738e-20
268859	Rbfox1	1.60588	3.2607	92.12	8.15772e-22	1.08127e-20
109332	Cdcp1	6.30052	0.963896	92.111	8.19501e-22	1.08528e-20
71946	Endod1	1.19508	4.56509	92.0321	8.5281e-22	1.12842e-20
105661730	Lincmd1	1.2274	4.79516	92.0108	8.6203e-22	1.13964e-20
20564	Slit3	1.01238	8.40989	91.9898	8.71253e-22	1.15084e-20
50997	Mpp2	-1.58268	3.43486	91.8485	9.35738e-22	1.23497e-20
210094	Iglon5	-1.65	3.40881	91.6034	1.05909e-21	1.39657e-20
11947	Atp5b	0.972229	9.87572	91.5759	1.07395e-21	1.41495e-20
217344	Rhbdf2	1.99505	3.55273	91.4009	1.17324e-21	1.54445e-20
72472	Slc16a10	2.54622	2.80188	91.0383	1.40918e-21	1.85346e-20
243300	Nyap1	-1.93767	2.75583	91.0148	1.426e-21	1.87398e-20
14645	Glul	1.40347	7.70091	91.0094	1.42988e-21	1.87747e-20
100042784	Prdm11	1.23961	4.58759	91.0065	1.432e-21	1.87866e-20
14999	H2-DMb1	-2.11795	2.36702	90.997	1.4389e-21	1.88611e-20
226442	Zfp281	-0.879499	5.97699	90.8731	1.53187e-21	2.00627e-20
227120	Plcl1	1.17603	4.31784	90.8225	1.57153e-21	2.05647e-20
237759	Col23a1	1.48583	6.87487	90.7016	1.67062e-21	2.18428e-20
110596	Arhgef28	-1.21256	4.86178	90.6625	1.70393e-21	2.22593e-20
235339	Dlat	1.13077	6.85374	90.5919	1.76578e-21	2.30478e-20
76261	0610040J01Rik	9.0652	0.117221	90.5284	1.8234e-21	2.37798e-20
17850	Mmut	0.897284	6.09521	90.4467	1.90025e-21	2.4761e-20
11964	Atp6v1a	-0.817241	7.38015	90.4102	1.93562e-21	2.52007e-20
24056	Sh3bp5	1.19333	4.53045	90.3798	1.96563e-21	2.55698e-20
19011	Endou	5.77099	0.779128	90.3399	2.00566e-21	2.60686e-20
73139	Cenpv	2.4046	2.96301	90.2274	2.12302e-21	2.75706e-20
13824	Epb41l4a	-1.39774	3.79561	90.2241	2.12658e-21	2.75936e-20
59125	Nek7	-0.802757	6.8585	90.2112	2.14045e-21	2.77503e-20
80885	Hcar2	6.30536	0.697667	90.144	2.21437e-21	2.86845e-20
105853	Mal2	5.62075	0.685133	90.123	2.23801e-21	2.89664e-20
11305	Abca2	0.832168	6.24099	90.0986	2.26587e-21	2.93023e-20
73569	Vgll3	-0.995834	7.93235	90.0184	2.35958e-21	3.04887e-20
14958	H1f0	-0.896362	7.70973	89.9679	2.42051e-21	3.12497e-20
104681	Slc16a6	2.1531	2.20048	89.8056	2.62753e-21	3.3894e-20
12522	Cd83	6.96335	0.273996	89.7507	2.70136e-21	3.48173e-20
243905	Zfp568	0.955233	5.37879	89.7461	2.7077e-21	3.48699e-20
70209	Tmem143	1.04822	4.94024	89.6677	2.81722e-21	3.62499e-20
17995	Ndufv1	1.02925	6.4015	89.607	2.90495e-21	3.73477e-20
620760	2900079G21Rik	5.27684	0.793592	89.3531	3.30271e-21	4.24261e-20
11835	Ar	0.883408	5.63253	89.275	3.43579e-21	4.40988e-20
52331	Stbd1	1.29555	4.28203	89.1426	3.67347e-21	4.71102e-20
64297	Gprc5b	0.832775	6.21243	88.973	4.00231e-21	5.12848e-20
235627	Nbeal2	1.36546	3.80564	88.9463	4.05681e-21	5.194e-20
234729	Vac14	1.08359	5.36688	88.7328	4.51921e-21	5.78121e-20
109731	Maob	1.129	4.71401	88.726	4.53458e-21	5.79607e-20
18746	Pkm	-0.98265	10.3687	88.7236	4.54023e-21	5.79848e-20
20349	Sema3e	1.85393	3.72637	88.5479	4.96178e-21	6.33161e-20
11733	Ank1	1.45504	4.33307	88.4991	5.08569e-21	6.48436e-20
12039	Bckdha	1.07965	6.20976	88.4842	5.12417e-21	6.52421e-20
12287	Cacna1b	1.822	3.07615	88.4838	5.12541e-21	6.52421e-20
226861	Hhat	-1.85489	2.95732	88.4633	5.17861e-21	6.58649e-20
11752	Anxa8	3.13994	6.14796	88.308	5.60162e-21	7.11863e-20
21950	Tnfsf9	-2.53692	2.01164	88.3038	5.61353e-21	7.12788e-20
225207	Zfp521	-0.922112	7.42799	88.3012	5.62107e-21	7.13159e-20
20650	Sntb2	0.81347	6.36337	88.2804	5.68025e-21	7.20075e-20
268451	Rab11fip4	-1.64352	3.45827	88.256	5.7509e-21	7.28432e-20
12111	Bgn	-0.891007	12.3798	88.1525	6.05988e-21	7.66939e-20
18550	Furin	-0.844323	7.25303	88.087	6.26365e-21	7.92077e-20
66949	Trim59	-1.02122	5.2692	88.0106	6.51062e-21	8.22633e-20
20181	Rxra	0.935828	7.41622	87.9263	6.79379e-21	8.57709e-20
13992	Khdrbs3	1.27563	4.24079	87.8919	6.91326e-21	8.72078e-20
107869	Cth	2.55152	2.68375	87.8589	7.02946e-21	8.85566e-20
239337	Adamts12	1.19471	5.6092	87.8583	7.03167e-21	8.85566e-20
382864	Colq	1.93824	2.68882	87.8355	7.11314e-21	8.95094e-20
67839	Gpsm1	-0.870904	5.59619	87.6635	7.75943e-21	9.75625e-20
208266	Dot1l	0.890758	6.18339	87.5261	8.31741e-21	1.04493e-19
214112	Nipal4	4.52209	1.39712	87.4777	8.52347e-21	1.06994e-19
107373	Fam111a	-1.04302	4.53194	87.4676	8.56707e-21	1.07454e-19
107765	Ankrd1	1.06472	6.33396	87.448	8.6527e-21	1.0844e-19
20280	Scp2	1.01332	8.42909	87.3423	9.12757e-21	1.14299e-19
17203	Mc5r	4.41309	0.891178	87.3075	9.28968e-21	1.16234e-19
474332	Dnm3os	-1.05844	6.92398	87.2966	9.34086e-21	1.1678e-19
108100	Baiap2	0.984673	6.08603	87.2887	9.37835e-21	1.17153e-19
242285	Sdr16c5	8.9868	0.0556243	87.2724	9.45588e-21	1.18026e-19
21847	Klf10	1.22729	4.30752	87.1638	9.98962e-21	1.24587e-19
14187	Akr1b8	-1.07286	4.85877	87.0517	1.05722e-20	1.31672e-19
19218	Ptger3	2.42814	2.68003	87.0512	1.05748e-20	1.31672e-19
20378	Frzb	-1.35197	3.8335	86.8797	1.15327e-20	1.43484e-19
19275	Ptprn	-1.61399	2.99071	86.8619	1.16368e-20	1.44663e-19
14178	Fgf7	-1.04467	7.8839	86.8522	1.16941e-20	1.45258e-19
382427	Best3	3.48273	1.66838	86.7891	1.20734e-20	1.49849e-19
105689	Mycbp2	-0.99383	8.30329	86.7149	1.25351e-20	1.55453e-19
192198	Lrrc4	3.82752	1.60639	86.7015	1.26199e-20	1.56379e-19
228836	Dlgap4	0.858211	6.91943	86.4198	1.45524e-20	1.80181e-19
12577	Cdkn1c	1.05836	7.73265	86.3576	1.50167e-20	1.85781e-19
71881	Apmap	1.40293	5.6866	86.1959	1.62964e-20	2.01451e-19
22038	Plscr1	-1.38625	3.79056	86.0702	1.73659e-20	2.145e-19
21809	Tgfb3	0.881329	8.31986	86.0269	1.77507e-20	2.19076e-19
107250	Kazald1	1.55011	3.37325	85.9886	1.80979e-20	2.23184e-19
21386	Tbx3	1.71296	2.76369	85.9321	1.86217e-20	2.29459e-19
77809	Lrrc42	-0.938549	5.29276	85.9259	1.86808e-20	2.30004e-19
16195	Il6st	-1.27705	10.4842	85.8142	1.97661e-20	2.43172e-19
211612	Ptchd1	6.37764	0.24526	85.7685	2.02283e-20	2.4866e-19
71774	Shroom1	-1.62018	2.96603	85.6175	2.18337e-20	2.6818e-19
18190	Nrxn2	3.25861	2.03068	85.5437	2.26633e-20	2.78149e-19
103266	Tmem263	-0.967743	5.78102	85.5114	2.30366e-20	2.82506e-19
22591	Xpc	0.933678	5.22235	85.2499	2.62947e-20	3.22204e-19
14281	Fos	-1.70287	3.55374	85.2322	2.65308e-20	3.24839e-19
110751	Adam33	1.71221	3.37592	85.1736	2.73291e-20	3.34347e-19
54394	Crlf3	-0.92989	5.05296	85.1573	2.75543e-20	3.36835e-19
72948	Tppp	4.56303	1.18838	85.131	2.79243e-20	3.41088e-19
170731	Mfn2	0.853667	7.15979	85.0915	2.84878e-20	3.47696e-19
70078	Nol7	0.877056	5.36457	85.0329	2.93436e-20	3.57857e-19
433940	Fam222a	2.26771	2.09437	85.0155	2.96041e-20	3.60749e-19
241624	Exd1	2.00684	2.47874	84.9869	3.00351e-20	3.65712e-19
11803	Aplp1	-0.988904	4.90809	84.9336	3.08552e-20	3.75401e-19
102657	Cd276	-1.05373	4.85042	84.9005	3.13764e-20	3.81441e-19
16419	Itgb5	-0.798268	8.25291	84.8223	3.2642e-20	3.96514e-19
70757	Hacd2	1.12938	6.18779	84.7002	3.4722e-20	4.21448e-19
72432	Spink5	7.62303	3.19031	84.629	3.59939e-20	4.36542e-19
12737	Cldn1	2.53024	3.35692	84.5624	3.72281e-20	4.51157e-19
70292	Afap1	0.847302	6.97411	84.5345	3.77563e-20	4.57198e-19
320790	Chd7	2.07326	3.41504	84.462	3.91673e-20	4.73912e-19
333639	Mamld1	1.27875	3.99479	84.4559	3.92881e-20	4.75e-19
11867	Arpc1b	-0.849517	8.03917	84.4256	3.98942e-20	4.81951e-19
19085	Prkar1b	-1.54109	3.52112	84.3509	4.14302e-20	5.00114e-19
54610	Tbc1d8	1.99295	2.61428	84.2708	4.3143e-20	5.20383e-19
12048	Bcl2l1	0.967955	5.70657	84.2673	4.32199e-20	5.20903e-19
14733	Gpc1	0.942288	6.90898	84.224	4.41783e-20	5.32038e-19
319530	Zfp750	6.11052	0.425154	84.0825	4.74541e-20	5.71042e-19
230073	Ddx58	-0.823451	6.42292	84.0652	4.78736e-20	5.7564e-19
56431	Dstn	0.994912	8.91417	84.0041	4.93755e-20	5.93237e-19
330189	Tmem120b	1.99168	3.36698	84.0023	4.94212e-20	5.93324e-19
66857	Plbd1	5.25641	0.786186	83.9296	5.1272e-20	6.15064e-19
229211	Acad9	0.996186	6.00308	83.8811	5.25447e-20	6.29842e-19
229011	Samd10	2.16478	2.27257	83.8207	5.41742e-20	6.4887e-19
29817	Igfbp7	0.997836	9.11638	83.7737	5.54787e-20	6.63979e-19
13636	Efna1	-1.45433	3.3208	83.7648	5.57275e-20	6.66439e-19
12363	Casp4	-1.72038	3.02006	83.6667	5.85632e-20	6.99807e-19
26941	Slc9a3r1	1.02524	4.72911	83.6282	5.97141e-20	7.13008e-19
107515	Lgr4	1.04014	4.93164	83.4811	6.43267e-20	7.6749e-19
242286	Sdr16c6	9.04786	0.138504	83.4352	6.58377e-20	7.8491e-19
67092	Gatm	1.57475	3.8295	83.4026	6.69339e-20	7.97362e-19
384783	Irs2	1.70598	6.00622	83.3295	6.94551e-20	8.26757e-19
80914	Uck2	-0.964469	5.80263	83.3075	7.02328e-20	8.35369e-19
74315	Rnf145	-0.771041	6.52092	83.3012	7.04555e-20	8.37372e-19
66841	Etfdh	0.86898	6.17599	83.2836	7.1087e-20	8.44226e-19
57265	Fzd2	-0.845266	7.50107	83.2589	7.19813e-20	8.54189e-19
70435	Inf2	-0.878717	6.26315	83.2315	7.29844e-20	8.65427e-19
223254	Farp1	-0.941725	7.51135	83.2248	7.32336e-20	8.67714e-19
18301	Fxyd5	-1.71074	2.9236	83.1583	7.57391e-20	8.96711e-19
72043	Sulf2	0.810616	7.07785	82.9877	8.25641e-20	9.76765e-19
14089	Fap	2.16398	3.71668	82.8924	8.66454e-20	1.02426e-18
71733	Susd2	2.65698	6.56693	82.8451	8.87429e-20	1.04825e-18
110380	Shroom2	-1.14823	4.22741	82.7252	9.42918e-20	1.11295e-18
22021	Tpst1	-0.921059	5.67766	82.5849	1.01227e-19	1.19389e-18
69608	Sec24d	-0.835066	7.1171	82.4536	1.08179e-19	1.2749e-18
12578	Cdkn2a	1.01864	4.68817	82.434	1.09261e-19	1.28667e-18
15483	Hsd11b1	2.19871	5.09159	82.4003	1.11138e-19	1.30778e-18
76074	Gbp8	2.82859	1.48749	82.3983	1.11248e-19	1.30807e-18
17472	Gbp4	2.56538	2.04947	82.3326	1.15008e-19	1.35126e-18
66330	1700020L24Rik	2.4438	2.12695	82.3186	1.15827e-19	1.35985e-18
73699	Ppp2r1b	0.943867	6.2697	82.2821	1.17984e-19	1.38344e-18
100616095	Snhg18	-0.994407	4.63108	82.2816	1.18017e-19	1.38344e-18
56434	Tspan3	-0.863358	8.14457	82.2685	1.18802e-19	1.39159e-18
19141	Lgmn	-1.01519	6.75329	82.2543	1.19656e-19	1.40053e-18
54445	Unc93b1	-1.11711	5.17498	82.244	1.20281e-19	1.40678e-18
14370	Fzd8	-0.781805	6.8031	82.1358	1.27049e-19	1.48481e-18
53791	Tlr5	-2.35532	2.04488	82.1198	1.28081e-19	1.49574e-18
208618	Etl4	1.26533	3.79375	81.7558	1.53981e-19	1.79683e-18
21393	Tcap	1.91951	2.90363	81.6412	1.63178e-19	1.90271e-18
74318	Hopx	5.3246	1.54708	81.5715	1.69038e-19	1.96956e-18
319901	Dsel	-0.878551	5.68921	81.4965	1.75572e-19	2.04415e-18
71934	Car13	0.978277	5.95688	81.349	1.89182e-19	2.20094e-18
56357	Ivd	1.12021	7.20715	81.3317	1.90838e-19	2.21853e-18
622473	Ripply1	1.89669	2.46453	81.2752	1.96371e-19	2.28113e-18
329252	Lgr6	2.05792	2.68747	81.2717	1.96723e-19	2.2835e-18
71529	Kazn	0.879182	5.6114	81.2156	2.02393e-19	2.34755e-18
69137	Vstm5	-2.82892	1.26614	81.207	2.03271e-19	2.35596e-18
99138	Stard7	0.946629	6.40994	81.1483	2.09404e-19	2.42522e-18
12035	Bcat1	-1.37367	3.59694	81.0549	2.19539e-19	2.54068e-18
243538	Cfap100	-1.72297	2.74239	80.986	2.27324e-19	2.6288e-18
216795	Wnt9a	1.84046	3.04922	80.9708	2.29081e-19	2.64714e-18
403395	Clec3a	-2.47532	2.06466	80.9647	2.29782e-19	2.65325e-18
209378	Itih5	1.67236	3.99576	80.9435	2.32265e-19	2.67992e-18
68337	Crip2	0.909309	6.96911	80.9411	2.32548e-19	2.68117e-18
76498	Paqr4	1.22967	4.21814	80.9231	2.34676e-19	2.70368e-18
11475	Acta2	0.895707	10.9362	80.8718	2.40846e-19	2.77269e-18
240057	Syngap1	-0.874091	5.3313	80.8579	2.42545e-19	2.79017e-18
18604	Pdk2	1.00238	5.61649	80.8429	2.4439e-19	2.8093e-18
19224	Ptgs1	-1.20267	4.13977	80.8343	2.45458e-19	2.81948e-18
234577	Cpne2	0.856926	5.63661	80.8039	2.49263e-19	2.86105e-18
26433	Plod3	-0.789271	7.70492	80.7767	2.52726e-19	2.89864e-18
13841	Epha7	1.62245	3.28137	80.7538	2.55662e-19	2.93013e-18
214968	Sema6d	1.09906	5.1255	80.7522	2.55876e-19	2.93041e-18
53422	Ybx2	3.93472	1.33957	80.7234	2.59635e-19	2.97125e-18
60525	Acss2	1.58799	5.18597	80.7093	2.61488e-19	2.99024e-18
68178	Cgnl1	0.862134	6.69666	80.6744	2.66148e-19	3.04126e-18
69574	Cmbl	3.18943	1.90141	80.6197	2.73613e-19	3.12426e-18
12716	Ckmt1	6.8375	0.280195	80.5324	2.85982e-19	3.26308e-18
106869	Tnfaip8	-0.901581	5.37674	80.5101	2.89228e-19	3.29767e-18
14104	Fasn	2.48828	9.60249	80.4934	2.91674e-19	3.3231e-18
16002	Igf2	0.868765	9.5218	80.455	2.97408e-19	3.38593e-18
380711	Rap1gap2	0.954311	4.80001	80.404	3.05182e-19	3.47187e-18
20111	Rps6ka1	-1.99491	3.13909	80.399	3.05946e-19	3.47799e-18
76612	Lrrc27	1.81273	3.16358	80.3908	3.07217e-19	3.48987e-18
16565	Kif21b	-1.63501	4.16033	80.3724	3.10102e-19	3.52005e-18
56079	Astn2	3.53309	1.42596	80.2973	3.22105e-19	3.6536e-18
12580	Cdkn2c	0.763329	6.24692	80.2523	3.29521e-19	3.73497e-18
68151	Wls	-0.840711	8.43712	80.232	3.32925e-19	3.77079e-18
114774	Pawr	0.832212	6.33166	80.2026	3.37928e-19	3.82465e-18
26362	Axl	-0.806048	8.31488	80.1599	3.45297e-19	3.90256e-18
64074	Smoc2	-1.84294	7.81056	80.1598	3.45319e-19	3.90256e-18
97440	B3gnt9	-1.15475	4.7594	80.113	3.53593e-19	3.99314e-18
66462	Rex1bd	0.833725	5.80308	80.0947	3.56897e-19	4.0275e-18
28080	Atp5o	0.969616	7.04317	80.0303	3.68713e-19	4.1578e-18
226866	Sbspon	1.83211	2.82165	79.9637	3.81353e-19	4.29719e-18
11685	Alox12e	8.85944	-0.0599302	79.869	4.0007e-19	4.5048e-18
12512	Cd63	-0.792123	8.78724	79.823	4.09508e-19	4.60771e-18
278279	Tmtc2	1.53117	3.40601	79.7878	4.16867e-19	4.68709e-18
18481	Pak3	-0.800519	6.34184	79.7471	4.25531e-19	4.78103e-18
99899	Ifi44	-1.78073	3.36135	79.6768	4.40958e-19	4.95074e-18
210293	Dock10	2.44637	2.71551	79.6672	4.43097e-19	4.97113e-18
17306	Sypl2	2.2144	3.09487	79.6514	4.46649e-19	5.00734e-18
14245	Lpin1	1.09802	6.04298	79.6355	4.5026e-19	5.04415e-18
60322	Chst7	1.70249	2.69756	79.5919	4.60297e-19	5.15286e-18
27403	Abca7	1.35577	3.84012	79.5434	4.7174e-19	5.27712e-18
106878	Smim3	-1.20918	4.35673	79.5278	4.75487e-19	5.31518e-18
50782	Rgs11	-1.59872	3.34902	79.5196	4.77474e-19	5.33352e-18
70355	Gprc5c	0.977031	4.84474	79.464	4.91098e-19	5.48173e-18
17448	Mdh2	0.928033	7.79481	79.4471	4.95323e-19	5.5249e-18
266815	Mill1	8.94715	0.0575431	79.339	5.23173e-19	5.83132e-18
70358	Steap1	-1.9798	2.12537	79.3142	5.29782e-19	5.90072e-18
30948	Bin1	0.949059	7.4693	79.2396	5.50174e-19	6.12342e-18
20947	Swap70	-0.882593	6.70397	79.127	5.82431e-19	6.47776e-18
213417	Klhdc8a	-1.10298	5.45085	79.1006	5.90264e-19	6.56015e-18
21817	Tgm2	1.00479	6.46255	79.0858	5.94701e-19	6.60469e-18
73720	Cst6	8.0658	4.94555	79.0136	6.16825e-19	6.84547e-18
320827	Cracd	1.67182	3.45661	78.8255	6.78459e-19	7.52406e-18
246154	Vasn	-0.75734	7.75623	78.8119	6.83149e-19	7.57063e-18
109205	Sobp	-1.18664	4.24642	78.7429	7.07412e-19	7.83388e-18
210789	Tbc1d4	1.32685	4.80946	78.7412	7.08047e-19	7.83528e-18
15931	Ids	-0.819381	6.77581	78.6449	7.43387e-19	8.22045e-18
269642	Nat8l	5.84363	2.89483	78.5873	7.65416e-19	8.45799e-18
14600	Ghr	1.00825	8.13528	78.5311	7.87488e-19	8.69565e-18
11610	Agtrap	-0.933333	5.46825	78.5287	7.88459e-19	8.70014e-18
240322	Adamts19	8.8591	-0.0739768	78.4771	8.09326e-19	8.92401e-18
66887	Lonp2	0.79739	7.13196	78.4733	8.10878e-19	8.93025e-18
12534	Cdk1	-1.12153	4.77801	78.4729	8.11051e-19	8.93025e-18
58172	Sertad2	-0.829242	6.15393	78.4403	8.2451e-19	9.07196e-18
72590	Ppme1	-0.767161	6.35539	78.401	8.41082e-19	9.24771e-18
73998	Herc3	1.33652	3.42016	78.2932	8.88281e-19	9.7597e-18
12628	Cfh	1.11568	5.85232	78.2829	8.92925e-19	9.80373e-18
18984	Por	1.119	6.44626	78.2455	9.09977e-19	9.98384e-18
20928	Abcc9	1.84327	2.69811	78.1997	9.31312e-19	1.02107e-17
18641	Pfkl	-0.872014	8.17281	78.1193	9.70024e-19	1.06275e-17
233733	Galnt18	2.86933	3.8966	78.046	1.00669e-18	1.10214e-17
12763	Cmah	-1.72917	2.73518	77.9988	1.03102e-18	1.12798e-17
29856	Smtn	0.776428	7.15647	77.9921	1.03452e-18	1.131e-17
21827	Thbs3	-1.08013	4.42011	77.9428	1.06067e-18	1.15876e-17
76137	Mcur1	1.13475	5.09937	77.7184	1.18831e-18	1.29729e-17
66629	Golph3	-0.879847	7.1441	77.6833	1.20957e-18	1.31957e-17
433759	Hdac1	-0.757295	6.74162	77.499	1.32791e-18	1.44765e-17
19024	Ppfibp2	1.74193	2.69449	77.4618	1.35317e-18	1.47414e-17
56374	Tmem59	-0.822718	8.00065	77.4487	1.36212e-18	1.48284e-17
68617	Mtcl1	1.2547	4.18359	77.4172	1.38403e-18	1.50563e-17
68947	Chst8	3.01286	2.28205	77.3507	1.43144e-18	1.55611e-17
19672	Rcn1	-0.796302	7.57513	77.2864	1.4788e-18	1.60646e-17
54392	Ncapg	-1.27117	3.75096	77.2671	1.49331e-18	1.62108e-17
69640	Fam83g	3.74646	0.915812	77.1945	1.54921e-18	1.68059e-17
268566	Gphn	1.0231	5.13384	77.1593	1.57714e-18	1.70968e-17
104027	Synpo	-0.814444	9.56018	77.1287	1.6017e-18	1.73508e-17
223780	Adm2	-4.59809	0.276705	77.0868	1.63605e-18	1.77104e-17
338535	E030013I19Rik	5.52107	0.459502	77.0841	1.63832e-18	1.77226e-17
66141	Ifitm3	-1.21366	8.29831	77.0563	1.66156e-18	1.79614e-17
18639	Pfkfb1	2.30706	3.01229	76.9907	1.71768e-18	1.85551e-17
77113	Klhl2	1.15758	4.55263	76.9682	1.7373e-18	1.87539e-17
13008	Csrp2	-1.05027	5.19955	76.9279	1.77316e-18	1.91275e-17
51798	Ech1	0.784311	6.38876	76.9044	1.79433e-18	1.93424e-17
106042	Prickle1	0.918155	4.89876	76.8966	1.80151e-18	1.94062e-17
20692	Sparc	-0.862045	11.7069	76.6891	2.00109e-18	2.1541e-17
23962	Oasl2	-1.12446	4.51565	76.6139	2.07869e-18	2.23608e-17
15116	Has1	-3.5402	0.82812	76.4136	2.30065e-18	2.47312e-17
93960	Nkd1	1.06209	4.59218	76.3762	2.3446e-18	2.5186e-17
239114	Il17d	1.48252	3.02472	76.3541	2.37099e-18	2.54518e-17
68493	Ndufaf4	1.06228	4.2694	76.3178	2.41494e-18	2.59056e-17
53886	Cdkl2	1.77084	2.78433	76.2847	2.45577e-18	2.63252e-17
102632	Acad11	1.01344	5.51404	76.2564	2.49122e-18	2.66867e-17
22259	Nr1h3	1.80978	3.43375	76.2247	2.53156e-18	2.71e-17
54381	Cpq	-0.842704	6.8473	76.1699	2.60282e-18	2.78435e-17
18419	Otog	2.53356	2.50623	76.0997	2.69704e-18	2.88314e-17
14119	Fbn2	-1.17756	8.85051	76.0963	2.70164e-18	2.88605e-17
353170	Txlng	1.27612	4.73777	76.0911	2.70879e-18	2.89169e-17
19228	Pth1r	-0.834639	5.62325	76.0741	2.73214e-18	2.9146e-17
15040	H2-T23	-0.912325	5.81003	75.9626	2.89083e-18	3.08175e-17
66152	Uqcr10	1.02492	5.88491	75.9075	2.97271e-18	3.16685e-17
100434	Slc44a1	-0.792018	6.97671	75.8247	3.09992e-18	3.30009e-17
232664	Ccdc136	-1.33351	3.86021	75.7503	3.21899e-18	3.42448e-17
260315	Nav3	1.55358	3.82517	75.6632	3.36425e-18	3.57654e-17
17930	Myom2	1.05933	5.91758	75.4761	3.69853e-18	3.92922e-17
69585	Hjv	1.10511	4.17305	75.4142	3.81638e-18	4.05161e-17
64292	Ptges	0.949348	5.72663	75.3922	3.85915e-18	4.0942e-17
71807	Tars2	0.89473	4.9553	75.3832	3.87669e-18	4.10998e-17
63953	Dusp10	1.16753	3.74344	75.3147	4.01367e-18	4.25228e-17
68041	Mid1ip1	1.24801	4.05742	75.2606	4.12501e-18	4.36725e-17
72572	Spats2	-0.813705	5.52046	75.2156	4.22023e-18	4.46499e-17
20848	Stat3	-0.793058	8.19337	75.1341	4.39794e-18	4.64981e-17
74777	Selenon	-0.776746	7.21511	75.1172	4.43586e-18	4.68669e-17
231858	Radil	1.30861	3.73458	75.0854	4.50787e-18	4.75951e-17
12321	Calu	-0.819565	9.64648	74.8636	5.04388e-18	5.32179e-17
20499	Slc12a7	1.12298	5.31098	74.8611	5.05036e-18	5.32498e-17
116939	Pnpla3	8.32153	3.96472	74.8586	5.05664e-18	5.32797e-17
70508	Bbx	-0.754544	5.95641	74.8386	5.10813e-18	5.37854e-17
13007	Csrp1	0.867112	9.31225	74.7816	5.25773e-18	5.53228e-17
194590	Reps2	2.24189	2.31721	74.6614	5.58784e-18	5.87562e-17
19125	Prodh	2.49417	2.75109	74.6302	5.67683e-18	5.96512e-17
12409	Cbr2	3.45618	5.66067	74.5898	5.79412e-18	6.08422e-17
54683	Prdx5	-0.73121	6.84723	74.531	5.96926e-18	6.26387e-17
226421	Rab7b	-1.38857	3.36613	74.5203	6.00169e-18	6.29361e-17
12215	Bsg	-0.772886	10.4359	74.4629	6.17896e-18	6.47509e-17
434197	Fam169b	-1.51871	3.44545	74.3318	6.60321e-18	6.91498e-17
20249	Scd1	4.07567	9.35496	74.3043	6.69591e-18	7.00729e-17
20753	Sprr1a	9.2837	4.91392	74.2338	6.93918e-18	7.25695e-17
67664	Rnf125	3.03088	2.6993	74.1361	7.29126e-18	7.61999e-17
72148	Tdrp	1.6938	2.72848	74.1261	7.32839e-18	7.6536e-17
53415	Htatip2	-0.943683	4.65728	74.0698	7.54044e-18	7.86973e-17
74080	Nmnat3	1.6343	3.09868	74.0373	7.66543e-18	7.99476e-17
67896	Ccdc80	-0.789809	9.86475	74.0044	7.79438e-18	8.12376e-17
104943	Fam110c	2.77047	2.499	73.9954	7.83e-18	8.15537e-17
230752	Eva1b	-0.958595	5.97843	73.9441	8.03592e-18	8.36419e-17
26934	Racgap1	-0.890229	5.00996	73.8884	8.26604e-18	8.5979e-17
17130	Smad6	0.787125	6.23872	73.8723	8.33391e-18	8.66265e-17
382014	Ano8	0.81619	6.03473	73.8413	8.46561e-18	8.79363e-17
71951	Gpc2	0.989729	4.96834	73.8343	8.49574e-18	8.81898e-17
381485	Trim55	1.3836	3.73482	73.8305	8.51211e-18	8.83003e-17
72003	Synpr	6.06754	1.59357	73.8081	8.6094e-18	8.92494e-17
20272	Scn7a	-1.45368	4.63168	73.7557	8.84064e-18	9.1585e-17
66525	Timm50	0.91756	5.42397	73.5945	9.59338e-18	9.93163e-17
20454	St3gal5	-0.847711	5.73421	73.5895	9.61769e-18	9.95011e-17
77590	Chst15	1.38638	5.35441	73.5162	9.98133e-18	1.03194e-16
67689	Aldh3b1	-1.14059	4.33718	73.5132	9.9965e-18	1.03282e-16
219134	Shisa2	1.5519	4.45473	73.2201	1.15968e-17	1.19736e-16
19143	St14	4.91702	0.634789	73.2097	1.16581e-17	1.20287e-16
14809	Grik5	0.888356	5.07794	73.1557	1.19813e-17	1.2354e-16
231050	Galnt11	-0.810026	5.49618	73.0723	1.24987e-17	1.28788e-16
16592	Fabp5	2.84045	8.19719	73.0107	1.28946e-17	1.32779e-16
101772	Ano1	2.68285	2.66045	72.9926	1.30136e-17	1.33915e-16
76901	Jade2	-1.00118	5.40105	72.8805	1.37743e-17	1.41649e-16
17001	Ltc4s	5.02973	0.578778	72.8406	1.40555e-17	1.44444e-16
74499	Sost	8.70684	-0.218998	72.7562	1.46694e-17	1.50652e-16
19660	Rbp2	8.72776	-0.185175	72.4949	1.67465e-17	1.71869e-16
235169	Foxred1	1.03893	4.90593	72.4723	1.6939e-17	1.73729e-16
56613	Rps6ka4	-0.736288	6.2646	72.3219	1.82803e-17	1.87361e-16
15354	Hmgb3	1.54586	3.68511	72.2986	1.84978e-17	1.89464e-16
378937	Lrrc24	1.13554	4.65684	72.1654	1.97892e-17	2.02556e-16
68565	Mrps18a	0.892641	4.76831	72.1421	2.00246e-17	2.04831e-16
14057	Sfxn1	1.3021	6.54054	72.0515	2.0965e-17	2.14308e-16
57911	Gsdma	4.7061	0.560262	71.9819	2.17184e-17	2.21862e-16
66222	Serpinb1a	1.11297	5.56585	71.9665	2.18885e-17	2.23451e-16
27047	Omd	-0.888404	7.26521	71.9436	2.21442e-17	2.25912e-16
67880	Dcxr	0.978172	4.77704	71.9385	2.2201e-17	2.26341e-16
67826	Snap47	-0.885235	6.15092	71.9195	2.24157e-17	2.28379e-16
20358	Sema6a	1.6147	2.95458	71.898	2.26612e-17	2.30728e-16
217030	Synrg	0.808997	5.8878	71.8683	2.30047e-17	2.34071e-16
14629	Gclc	0.82329	5.28208	71.8092	2.37045e-17	2.41032e-16
21664	Phlda1	0.843432	5.05995	71.7658	2.42318e-17	2.46231e-16
16427	Itih4	7.36104	1.78084	71.6996	2.50581e-17	2.5446e-16
66913	Kdelr2	-0.82961	7.38763	71.6674	2.54702e-17	2.58475e-16
74551	Pck2	-0.832393	5.30478	71.4735	2.81013e-17	2.84987e-16
14702	Gng2	-2.36123	2.26101	71.3704	2.96086e-17	3.00077e-16
13865	Nr2f1	1.05278	5.06564	71.209	3.21311e-17	3.25428e-16
19159	Cyth3	-0.713231	6.82098	71.2006	3.22694e-17	3.26614e-16
20910	Stxbp1	-0.984131	5.51582	71.1893	3.2455e-17	3.28277e-16
11857	Arhgdib	-0.92717	5.71498	71.1222	3.35777e-17	3.3941e-16
12738	Cldn2	1.83299	3.95589	71.0994	3.3968e-17	3.4313e-16
14177	Fgf6	4.76618	0.422164	71.0688	3.44982e-17	3.48258e-16
74754	Dhcr24	1.07003	5.72543	70.8457	3.86277e-17	3.8969e-16
333182	Cox6b2	1.53745	2.77458	70.7593	4.03586e-17	4.06885e-16
216148	Shc2	-0.869315	5.03125	70.7252	4.1062e-17	4.13707e-16
18807	Pld3	-0.727928	7.51875	70.577	4.42659e-17	4.45695e-16
277353	Tcfl5	1.78752	2.89414	70.5691	4.44418e-17	4.47174e-16
232334	Vgll4	1.03566	6.62386	70.5579	4.4695e-17	4.49428e-16
212448	9330159F19Rik	2.85391	1.1969	70.4816	4.64574e-17	4.66845e-16
67800	Dgat2	2.65344	5.02301	70.4653	4.68432e-17	4.70415e-16
71724	Aox3	3.35936	3.0305	70.4383	4.74884e-17	4.76585e-16
17390	Mmp2	-0.814096	9.23858	70.4293	4.77054e-17	4.7845e-16
20527	Slc2a3	-1.63068	2.60235	70.3307	5.01505e-17	5.02646e-16
26611	Rcn2	-0.72095	7.28246	70.2742	5.16082e-17	5.16921e-16
18553	Pcsk6	-0.721934	6.8776	70.214	5.32062e-17	5.3258e-16
107371	Exoc6	1.63546	2.84523	70.2126	5.3244e-17	5.32613e-16
14042	Ext1	-0.710127	7.05966	70.1796	5.41444e-17	5.41269e-16
18704	Pik3c2a	-0.780523	6.50424	70.061	5.74977e-17	5.74418e-16
433926	Lrrc8b	1.65624	2.65554	70.0062	5.91189e-17	5.90232e-16
233870	Tufm	0.9967	6.1442	69.9979	5.93671e-17	5.92326e-16
14811	Grin2a	8.61945	-0.303754	69.9774	5.99876e-17	5.9813e-16
381489	Rxfp1	7.17197	1.62933	69.9282	6.15015e-17	6.12828e-16
58521	Eid1	-0.784518	6.41285	69.8951	6.25432e-17	6.22806e-16
71767	Tysnd1	0.866544	5.64218	69.866	6.34719e-17	6.31646e-16
56811	Dkk2	1.55466	3.30698	69.8143	6.51592e-17	6.48019e-16
171167	Fut10	-1.0319	4.63598	69.8128	6.52074e-17	6.4808e-16
211712	Pcdh9	-0.935187	5.34916	69.6608	7.04309e-17	6.99544e-16
67442	Retsat	1.22503	4.41894	69.655	7.06383e-17	7.01152e-16
26395	Map2k1	-0.701936	6.92155	69.5767	7.35016e-17	7.29104e-16
226778	Mark1	-1.20807	5.40227	69.5258	7.54223e-17	7.47675e-16
56753	Tacstd2	6.81005	2.32478	69.4993	7.64425e-17	7.57301e-16
16848	Lfng	1.47449	3.44441	69.4949	7.6613e-17	7.58503e-16
64661	Krtdap	8.44535	3.13564	69.3954	8.05771e-17	7.97237e-16
218820	Zfp503	0.883701	7.0993	69.3478	8.25446e-17	8.1618e-16
29818	Hspb7	1.26252	4.68567	69.2672	8.59865e-17	8.49668e-16
74186	Ccdc3	4.85611	0.686083	69.1895	8.94441e-17	8.83267e-16
66049	Rogdi	1.01266	4.39757	69.1279	9.2282e-17	9.10709e-16
16180	Il1rap	-1.65276	6.40135	69.0975	9.37145e-17	9.24254e-16
27999	Fam3c	-0.948389	5.46932	68.9586	1.00553e-16	9.91067e-16
12177	Bnip3l	-0.716524	7.65258	68.9515	1.00917e-16	9.94017e-16
56401	P3h1	-0.7462	6.83464	68.833	1.07162e-16	1.05485e-15
19418	Rasgrf2	7.11771	-0.0709835	68.7813	1.10012e-16	1.08222e-15
20515	Slc20a1	-0.915171	4.80091	68.7093	1.14104e-16	1.12176e-15
218294	Cdc14b	-1.05783	4.21467	68.6855	1.15486e-16	1.13462e-15
20887	Sult1a1	1.43199	3.15299	68.6306	1.18745e-16	1.1659e-15
216198	Tcp11l2	-0.964922	5.44043	68.6119	1.1988e-16	1.17629e-15
242050	Igsf10	-1.73567	6.0302	68.5462	1.23941e-16	1.21537e-15
26897	Acot1	-1.35394	4.3074	68.5407	1.24288e-16	1.21799e-15
20733	Spint2	1.85557	2.53545	68.5297	1.24982e-16	1.22402e-15
21380	Tbx1	2.97322	1.73921	68.484	1.27912e-16	1.25191e-15
110253	Triobp	-0.82552	6.31359	68.4392	1.30849e-16	1.27984e-15
15064	Mr1	-0.969843	5.11598	68.3093	1.39761e-16	1.36615e-15
59014	Rrs1	0.982965	5.1104	68.2861	1.41417e-16	1.38146e-15
54598	Calcrl	1.31043	3.18728	68.2433	1.44515e-16	1.41082e-15
217684	Susd6	-0.739219	7.60151	68.2106	1.46937e-16	1.43357e-15
27357	Gyg	0.943533	6.14586	68.188	1.48624e-16	1.44911e-15
353282	Sfmbt2	-1.87714	2.6084	68.1579	1.50912e-16	1.47048e-15
373864	Col27a1	0.910501	6.24065	68.1276	1.53254e-16	1.49236e-15
244895	Peak1	-0.787419	8.29252	68.1193	1.53897e-16	1.49768e-15
12857	Cox4i1	0.853125	7.92246	68.0998	1.55423e-16	1.51158e-15
14165	Fgf10	5.36745	3.98391	68.0933	1.55937e-16	1.51562e-15
209692	Dhtkd1	1.18996	3.69106	68.0304	1.60998e-16	1.56382e-15
28030	Gfm1	0.785096	5.76021	68.0278	1.61205e-16	1.56485e-15
13038	Ctsk	-0.893589	5.72971	68.0237	1.6154e-16	1.56711e-15
229905	Kyat3	1.46633	3.15311	67.9732	1.65733e-16	1.60678e-15
13171	Dbt	0.813418	5.59992	67.874	1.74286e-16	1.68864e-15
60440	Iigp1	1.28602	5.70813	67.839	1.77402e-16	1.71752e-15
17931	Ppp1r12a	0.740246	6.9195	67.8381	1.7749e-16	1.71752e-15
66117	Fmc1	1.83342	2.3832	67.7049	1.89893e-16	1.83639e-15
80752	Fam20c	0.807821	5.25763	67.6686	1.93423e-16	1.86935e-15
13709	Elf1	-0.754436	6.1244	67.618	1.98448e-16	1.91672e-15
225872	Npas4	2.1924	2.37718	67.5568	2.04701e-16	1.97587e-15
20776	Tmie	-2.06531	2.33119	67.5533	2.05068e-16	1.97818e-15
14788	Gpr162	-0.933161	4.43219	67.5291	2.07604e-16	2.00139e-15
16518	Kcnj2	-1.46248	3.59275	67.5208	2.08474e-16	2.00852e-15
56532	Ripk3	-0.957062	4.71552	67.4878	2.11994e-16	2.04115e-15
76219	Arxes1	2.7814	1.41415	67.4854	2.12254e-16	2.04239e-15
214444	Cdk5rap2	-0.894404	5.35607	67.473	2.13591e-16	2.05397e-15
11772	Ap2a2	-0.761795	7.74354	67.4489	2.16218e-16	2.07793e-15
56332	Amotl2	-0.7471	9.50672	67.4385	2.17366e-16	2.08766e-15
67452	Pnpla8	0.828992	6.86321	67.4295	2.18357e-16	2.09587e-15
74161	Ctcflos	8.61039	-0.298664	67.2751	2.36145e-16	2.2652e-15
320802	Ifitm10	-1.02824	4.32294	67.2382	2.40611e-16	2.3066e-15
246782	Atpaf2	0.954438	5.01243	67.2059	2.4458e-16	2.34319e-15
21828	Thbs4	-2.67748	1.43069	67.1883	2.46779e-16	2.36279e-15
50708	H1f2	-0.817711	5.90396	67.1666	2.49512e-16	2.38747e-15
52662	Ldlrad4	-1.4538	3.90427	67.15	2.51617e-16	2.40613e-15
81840	Sorcs2	-0.975857	5.37143	67.1461	2.52111e-16	2.40936e-15
12442	Ccnb2	-1.01528	4.04683	67.1273	2.5453e-16	2.43097e-15
107581	Col16a1	-0.957333	8.08924	67.0946	2.5879e-16	2.47013e-15
93887	Pcdhb16	-1.18221	3.62657	67.0726	2.61694e-16	2.49594e-15
13685	Eif4ebp1	1.52167	5.8728	67.0716	2.61819e-16	2.49594e-15
170676	Peg10	0.806702	5.71755	66.9147	2.83508e-16	2.70103e-15
59012	Moxd1	-2.7821	1.63593	66.8855	2.87748e-16	2.73974e-15
17318	Mid1	-1.18417	4.73055	66.8567	2.91972e-16	2.77824e-15
16545	Kera	8.48598	-0.426631	66.8343	2.95319e-16	2.80835e-15
232345	A2m	-6.25393	3.44044	66.7841	3.02939e-16	2.87904e-15
20183	Rxrg	3.22108	1.80303	66.7562	3.0725e-16	2.91821e-15
15505	Hsph1	-0.751239	7.50802	66.7262	3.11953e-16	2.96106e-15
224829	Trerf1	-1.04089	4.30666	66.7201	3.12922e-16	2.96842e-15
94216	Col4a6	-2.24997	2.16528	66.6986	3.16357e-16	2.99917e-15
75552	Paqr9	8.59415	-0.300524	66.669	3.21143e-16	3.04267e-15
235135	Tmem45b	8.68085	-0.223119	66.6402	3.25869e-16	3.08555e-15
20723	Serpinb9	-0.856938	6.90024	66.6197	3.29287e-16	3.11485e-15
212862	Chpt1	1.61688	6.84474	66.6192	3.29368e-16	3.11485e-15
100504518	3425401B19Rik	2.50388	2.45024	66.542	3.42519e-16	3.23724e-15
14619	Gjb2	2.90628	1.36623	66.4047	3.67221e-16	3.46857e-15
271970	Arsj	-2.2498	2.25666	66.359	3.75842e-16	3.54783e-15
110446	Acat1	0.768864	7.12948	66.1988	4.07666e-16	3.84588e-15
13177	Eci1	1.34161	5.21103	66.1873	4.10039e-16	3.8659e-15
56501	Elf4	-0.930599	5.40818	66.1627	4.152e-16	3.91217e-15
94089	Trim7	1.43132	2.98206	66.1558	4.16652e-16	3.92345e-15
114601	Ehbp1l1	0.873164	7.15648	66.0398	4.41907e-16	4.15873e-15
229285	Spg20	-0.732306	6.42972	66.0336	4.43291e-16	4.16921e-15
67893	Tmem86a	-1.27969	4.41296	66.0111	4.48398e-16	4.21467e-15
14403	Gabrd	2.61724	1.17649	65.9745	4.568e-16	4.29103e-15
231991	Creb5	2.46052	1.61307	65.9431	4.64123e-16	4.35716e-15
18194	Nsdhl	1.02843	4.7384	65.9419	4.64418e-16	4.35727e-15
67041	Oxct1	1.0231	8.11023	65.9156	4.70641e-16	4.41298e-15
641361	Pinlyp	8.5533	-0.326703	65.8923	4.76251e-16	4.46287e-15
211550	Tifa	-1.65819	2.70231	65.8534	4.85735e-16	4.54897e-15
75607	Wnk2	1.48378	3.33969	65.8313	4.91223e-16	4.59758e-15
75744	Svip	3.35525	0.817055	65.7981	4.99574e-16	4.67289e-15
18218	Dusp8	1.03582	3.97968	65.6995	5.25194e-16	4.90799e-15
18049	Ngf	1.63007	2.81778	65.6989	5.25344e-16	4.90799e-15
80292	Zxdc	0.995059	5.35784	65.6362	5.42345e-16	5.06374e-15
26940	Ecsit	1.04482	3.89382	65.6105	5.49445e-16	5.12693e-15
230777	Hcrtr1	4.67331	0.352293	65.5936	5.54171e-16	5.1679e-15
210808	Lacc1	1.13046	3.90842	65.5794	5.58179e-16	5.20213e-15
329910	Acot11	-1.55838	3.05609	65.5193	5.75487e-16	5.36021e-15
226049	Dmrt2	3.31924	0.67844	65.4992	5.81372e-16	5.41175e-15
98711	Rdh10	1.05724	5.66333	65.4924	5.83377e-16	5.42713e-15
112405	Egln1	-0.811666	7.23484	65.3811	6.17271e-16	5.73898e-15
19229	Ptk2b	1.23567	4.42551	65.3609	6.23636e-16	5.79466e-15
100504235	Gm20125	8.49097	-0.417796	65.2874	6.47348e-16	6.01137e-15
14313	Fst	-0.703846	6.65606	65.1649	6.88872e-16	6.39311e-15
20357	Sema5b	8.45665	-0.444745	65.1155	7.06345e-16	6.55133e-15
17067	Ly6c1	0.843495	5.69874	65.1063	7.09643e-16	6.57796e-15
20425	Shmt1	1.46485	3.15795	65.069	7.23193e-16	6.69953e-15
240879	Mettl11b	6.53014	-0.0627024	65.0336	7.36325e-16	6.81708e-15
21763	Tex2	0.919959	5.40423	65.0156	7.43065e-16	6.87535e-15
74769	Pik3cb	-0.956897	4.58283	64.9722	7.59637e-16	7.02448e-15
50760	Fbxo17	-1.16063	3.65338	64.9171	7.81166e-16	7.21923e-15
67803	Limd2	-0.792023	5.38669	64.8931	7.90732e-16	7.30326e-15
12051	Bcl3	-1.21298	4.36217	64.7185	8.64013e-16	7.9753e-15
236790	Ints6l	1.08859	4.75055	64.6919	8.75759e-16	8.07889e-15
228677	Sptlc3	8.41953	-0.471125	64.6435	8.97534e-16	8.27481e-15
52915	Zmiz2	0.718381	6.12465	64.6147	9.10723e-16	8.39139e-15
18011	Neurl1a	1.03198	5.18384	64.4917	9.69406e-16	8.92676e-15
78255	Ralgps2	1.34673	3.22359	64.466	9.82148e-16	9.03869e-15
66175	Mustn1	1.10002	4.30162	64.4176	1.00653e-15	9.25751e-15
622434	Arhgef26	2.33669	1.73114	64.3876	1.02202e-15	9.39438e-15
67867	Lrrc28	1.0788	4.0095	64.3826	1.02459e-15	9.4124e-15
100910	Chpf2	-0.759007	5.60436	64.2525	1.09452e-15	1.00488e-14
14563	Gdf5	2.53483	2.10701	64.2162	1.11487e-15	1.02296e-14
57815	Spata5	0.990848	4.32234	64.1589	1.14776e-15	1.05251e-14
192176	Flna	0.750057	11.413	64.0306	1.22499e-15	1.12267e-14
74513	Neto2	1.25368	4.81063	63.9419	1.28141e-15	1.17368e-14
17885	Myh8	0.878914	7.84538	63.7912	1.3833e-15	1.26625e-14
20264	Scn10a	3.45907	0.769625	63.7208	1.4336e-15	1.31151e-14
21345	Tagln	0.809733	9.72283	63.6847	1.46011e-15	1.33497e-14
29820	Tnfrsf19	2.20417	2.0249	63.6559	1.48168e-15	1.35389e-14
99439	Duox1	4.02025	0.401633	63.6476	1.48793e-15	1.35879e-14
93732	Acox2	-2.46681	2.01446	63.6321	1.49963e-15	1.36867e-14
71884	Chit1	8.36487	-0.523189	63.5802	1.53972e-15	1.40442e-14
102634333	1110002E22Rik	0.931768	4.35214	63.5562	1.55854e-15	1.42075e-14
12182	Bst1	-4.91317	2.04573	63.5397	1.57165e-15	1.43186e-14
72007	Fndc3b	-0.739208	8.18716	63.4994	1.60419e-15	1.46064e-14
14675	Gna14	-1.65732	2.68788	63.4761	1.62324e-15	1.47711e-14
70122	Mllt3	-0.741968	5.73655	63.4645	1.63286e-15	1.48498e-14
11637	Ak2	1.41569	6.35219	63.4616	1.63523e-15	1.48627e-14
329540	Nol4l	-1.30885	3.43499	63.403	1.68458e-15	1.53021e-14
16193	Il6	-3.48361	1.66771	63.38	1.70437e-15	1.54728e-14
26568	Slc27a3	-1.00981	4.56718	63.3693	1.71368e-15	1.55482e-14
12859	Cox5b	0.99312	6.14915	63.3546	1.72652e-15	1.56555e-14
53627	Porcn	1.29681	5.01409	63.3369	1.74209e-15	1.57861e-14
237360	Adamts14	1.37706	3.29206	63.3359	1.74298e-15	1.57861e-14
20192	Ryr3	2.60992	1.90443	63.287	1.78681e-15	1.61736e-14
215690	Nav1	0.784675	5.72465	63.2722	1.80028e-15	1.62859e-14
69226	Snx24	-1.39617	3.5407	63.2509	1.81983e-15	1.64532e-14
26410	Map3k8	-1.3133	3.22532	63.2107	1.8574e-15	1.6783e-14
13732	Emp3	-0.778435	6.23975	63.1752	1.89117e-15	1.70781e-14
55927	Hes6	1.30851	5.97329	63.1097	1.95509e-15	1.7645e-14
23921	Sh2b2	2.25909	4.03467	63.1028	1.96192e-15	1.76963e-14
56752	Aldh9a1	0.863338	5.59491	63.0594	2.00564e-15	1.80801e-14
231821	Adap1	3.65194	0.830593	63.0295	2.03634e-15	1.83461e-14
107094	Rrp12	0.952448	4.78156	63.013	2.05347e-15	1.84896e-14
13082	Cyp26a1	5.33756	0.456817	63.0104	2.05616e-15	1.85031e-14
13537	Dusp2	3.63897	1.441	62.9982	2.0689e-15	1.86069e-14
71461	Ptk7	-0.740262	6.72516	62.963	2.10629e-15	1.8932e-14
96979	Ptges2	1.03936	4.70717	62.8825	2.19416e-15	1.97103e-14
244864	Layn	-1.85892	4.68002	62.8733	2.20443e-15	1.9791e-14
104175	Sbk1	0.851817	4.8039	62.8096	2.27692e-15	2.043e-14
22272	Uqcrq	1.12512	6.23643	62.627	2.49802e-15	2.24008e-14
21379	Tbrg4	0.879601	5.0374	62.5888	2.54704e-15	2.28271e-14
85308	Emc9	1.23127	4.02098	62.4965	2.66921e-15	2.39081e-14
71373	Prr16	1.50694	3.41235	62.4951	2.67105e-15	2.39107e-14
269608	Plekhg5	-0.700995	5.9094	62.4052	2.79586e-15	2.50135e-14
13876	Erg	-2.2103	2.30683	62.3723	2.84296e-15	2.54201e-14
242915	Garem2	-2.43357	1.98788	62.2944	2.95771e-15	2.64308e-14
74246	Gale	1.2885	4.36204	62.285	2.97177e-15	2.6541e-14
78749	Filip1l	0.923657	6.3245	62.1832	3.12941e-15	2.79327e-14
19734	Rgs16	0.976921	5.22914	62.1232	3.22625e-15	2.87805e-14
233549	Mogat2	-6.53507	-0.178407	62.1149	3.23985e-15	2.88851e-14
94192	C1galt1	-0.843855	5.28025	62.0975	3.26861e-15	2.91246e-14
245350	AA414768	-1.41158	3.02799	62.0906	3.28013e-15	2.92104e-14
211401	Mtss1	0.849918	6.15038	62.0108	3.41576e-15	3.04006e-14
16447	Ivl	5.20689	0.141466	61.9971	3.43961e-15	3.05953e-14
327942	Pigl	1.21457	3.4311	61.9908	3.45066e-15	3.06758e-14
20965	Syn2	3.07963	1.35128	61.9776	3.47383e-15	3.0864e-14
243659	Styk1	1.69591	2.42698	61.8803	3.64986e-15	3.24093e-14
21983	Tpbg	-0.809884	5.58144	61.8726	3.66417e-15	3.25177e-14
56233	Hdac7	-0.706975	6.91186	61.8431	3.71947e-15	3.29894e-14
228026	Pdk1	-0.904754	7.19653	61.8405	3.72429e-15	3.30132e-14
14594	Ggta1	-0.948431	6.61278	61.7914	3.81834e-15	3.38275e-14
19261	Sirpa	-1.04577	5.30849	61.6411	4.12133e-15	3.64907e-14
94284	Ugt1a6a	2.88641	1.00619	61.6316	4.14116e-15	3.66452e-14
66090	Ypel3	-0.786138	6.35704	61.6046	4.19827e-15	3.71293e-14
229521	Syt11	0.848796	5.50306	61.5356	4.34808e-15	3.84321e-14
270120	Fat3	4.18969	0.318914	61.4658	4.5049e-15	3.97954e-14
211134	Lzts1	2.2616	2.13531	61.3817	4.70161e-15	4.15093e-14
242100	Pglyrp3	8.52842	-0.366668	61.3788	4.70842e-15	4.15457e-14
214531	Tmprss13	8.30424	-0.576854	61.3309	4.82455e-15	4.2546e-14
110893	Slc8a3	1.78925	2.05034	61.326	4.83642e-15	4.26263e-14
19106	Eif2ak2	-0.769488	6.08598	61.1465	5.29829e-15	4.66704e-14
170756	Slc8b1	1.00194	4.61275	61.0878	5.45841e-15	4.80533e-14
243083	Tmprss11f	8.36807	-0.51467	61.0765	5.49002e-15	4.8304e-14
70397	Tmem70	0.73846	5.63025	60.9993	5.70948e-15	5.02063e-14
55951	Mpc1	1.02553	4.40068	60.9386	5.88821e-15	5.17484e-14
99586	Dpyd	1.48574	2.6237	60.9077	5.9814e-15	5.25375e-14
74525	Fam234b	-1.08158	3.85198	60.8812	6.06254e-15	5.32199e-14
13852	Stx2	-0.764135	5.31578	60.8437	6.17898e-15	5.42112e-14
65960	Twsg1	-0.784668	7.85947	60.8423	6.18342e-15	5.42192e-14
80287	Apobec3	-0.983095	4.82904	60.8088	6.2895e-15	5.5118e-14
108760	Galnt16	1.09499	4.19485	60.7556	6.46183e-15	5.65961e-14
231125	Zfyve28	1.82863	2.14961	60.6825	6.70639e-15	5.87047e-14
72599	Pdia5	-0.83335	4.92666	60.6447	6.8363e-15	5.98079e-14
217149	Cisd3	1.14211	4.21485	60.5696	7.1024e-15	6.21006e-14
17973	Nck1	-0.734654	5.55975	60.4876	7.40452e-15	6.47056e-14
76467	Msrb2	-1.57874	2.44368	60.4652	7.48922e-15	6.54086e-14
328381	Sh2d4b	3.07649	0.792041	60.456	7.52406e-15	6.56758e-14
73246	Rassf6	2.65558	1.97701	60.3591	7.90394e-15	6.89526e-14
12615	Cenpa	-0.972517	4.02094	60.3082	8.11072e-15	7.07165e-14
16842	Lef1	1.72906	2.79917	60.1967	8.58353e-15	7.47965e-14
224024	Scarf2	-0.692073	7.67734	60.1443	8.81496e-15	7.67698e-14
93885	Pcdhb14	-1.30383	3.45736	60.1233	8.90956e-15	7.75499e-14
12164	Bmp8b	3.04586	1.01072	60.0093	9.44098e-15	8.2129e-14
19122	Prnp	0.882127	8.45845	59.9955	9.50765e-15	8.26624e-14
64654	Fgf23	-3.18145	2.5122	59.9862	9.55265e-15	8.30069e-14
68732	Carmil1	-0.852413	4.74952	59.9288	9.83501e-15	8.54122e-14
22032	Traf4	0.780456	6.03911	59.925	9.85422e-15	8.55308e-14
83965	Enpp5	0.836105	4.82698	59.8632	1.01687e-14	8.82109e-14
18033	Nfkb1	-0.713062	7.00978	59.8413	1.02825e-14	8.91476e-14
14381	G6pdx	0.812391	6.90371	59.7983	1.05094e-14	9.10635e-14
72313	Fryl	0.785003	6.83062	59.7807	1.06038e-14	9.183e-14
14681	Gnao1	0.825578	4.8388	59.7772	1.06227e-14	9.19418e-14
70361	Lman1	-0.661453	7.3716	59.7607	1.07124e-14	9.26661e-14
52064	Coq5	0.973177	4.63271	59.7432	1.08081e-14	9.34415e-14
330695	Ctxn1	0.908878	5.05486	59.7233	1.09178e-14	9.43373e-14
66616	Snx9	-0.681049	6.61759	59.7175	1.09497e-14	9.45601e-14
242409	Tmem8b	0.812295	5.29592	59.7156	1.09604e-14	9.45993e-14
21955	Tnnt1	1.30683	5.97264	59.6924	1.10903e-14	9.5667e-14
53978	Lpar2	-1.60488	3.22887	59.5745	1.17751e-14	1.01517e-13
16170	Il16	-0.941998	4.68619	59.5015	1.22199e-14	1.05293e-13
17919	Myo5b	4.58619	0.751363	59.4627	1.24637e-14	1.07334e-13
58875	Hibadh	0.778257	6.38895	59.4551	1.25114e-14	1.07684e-13
75805	Nln	0.737432	6.0697	59.3066	1.34926e-14	1.16065e-13
225997	Trpm6	-1.27808	2.99196	59.2792	1.36812e-14	1.17621e-13
237611	Stac3	1.41291	2.79654	59.2614	1.38057e-14	1.18626e-13
22154	Tubb5	-0.719678	9.86149	59.1993	1.42488e-14	1.22365e-13
66435	Uggt2	-0.817969	5.13862	59.1961	1.42715e-14	1.22492e-13
13426	Dync1i1	3.65023	1.57491	59.1601	1.45354e-14	1.24687e-13
242484	D630039A03Rik	2.65078	0.993745	59.1464	1.46366e-14	1.25486e-13
226040	Tmem252	2.58355	2.51823	59.095	1.50237e-14	1.28733e-13
20361	Sema7a	-1.30401	3.35419	59.07	1.52162e-14	1.3031e-13
260409	Cdc42ep3	0.678468	7.05672	58.9413	1.62448e-14	1.39042e-13
77219	Ptgr2	0.676388	6.23356	58.9378	1.62732e-14	1.39208e-13
17937	Nab2	-1.11592	5.87208	58.8968	1.66166e-14	1.42066e-13
12683	Cidea	3.75493	1.24729	58.8446	1.7063e-14	1.45801e-13
54156	Egfl6	1.01089	5.7052	58.8143	1.73279e-14	1.47983e-13
78653	Bola3	1.19522	4.52924	58.7754	1.76738e-14	1.50854e-13
107767	Scamp1	-0.704156	5.91265	58.7701	1.77216e-14	1.51177e-13
67468	Mmd	0.71469	5.89159	58.5901	1.94189e-14	1.65566e-13
70861	Akr1cl	6.41207	-0.0810193	58.5871	1.94485e-14	1.65726e-13
56282	Mrpl12	1.2108	4.3387	58.5676	1.96424e-14	1.67286e-13
216188	Aldh1l2	-1.37409	3.58407	58.5545	1.97733e-14	1.68308e-13
73166	Tm7sf2	1.54008	3.64091	58.3514	2.19243e-14	1.86514e-13
93897	Fzd10	4.33459	0.18933	58.285	2.26766e-14	1.92807e-13
17939	Naga	-0.745243	5.75035	58.1293	2.45447e-14	2.08576e-13
18188	Nrtn	-2.17805	1.94202	58.1211	2.46463e-14	2.09324e-13
74772	Atp13a2	0.821945	5.36451	58.091	2.50267e-14	2.12437e-13
69743	Casz1	2.76008	2.6643	58.0563	2.54723e-14	2.16101e-13
12176	Bnip3	-0.909265	7.97566	58.0221	2.5919e-14	2.1977e-13
13507	Dsc3	8.0276	3.82888	57.9571	2.67895e-14	2.27026e-13
621603	Aldh3b2	5.41769	0.254711	57.8548	2.82205e-14	2.39021e-13
227333	Dgkd	0.799455	6.44939	57.8304	2.85717e-14	2.41863e-13
67419	Armh4	-0.8403	5.53656	57.8243	2.86601e-14	2.42478e-13
16782	Lamc2	1.89795	2.09702	57.773	2.94175e-14	2.4875e-13
16431	Itm2a	0.738703	6.80935	57.7057	3.04418e-14	2.5727e-13
22245	Uck1	0.706799	5.60648	57.6844	3.0774e-14	2.59935e-13
328258	Slc25a48	6.4003	-0.117229	57.6758	3.09077e-14	2.60921e-13
15486	Hsd17b2	8.19645	-0.667704	57.6656	3.10685e-14	2.62136e-13
12406	Serpinh1	-0.7017	10.2352	57.643	3.1428e-14	2.65023e-13
192285	Phf21a	-0.709855	6.08515	57.6073	3.2003e-14	2.69725e-13
15531	Ndst1	-0.681924	7.21867	57.5706	3.26057e-14	2.74654e-13
233103	Garre1	-0.735984	5.46481	57.5554	3.28594e-14	2.7664e-13
56325	Abcb9	1.25228	3.10604	57.5368	3.3172e-14	2.79119e-13
387314	Tmtc1	1.23249	5.04906	57.5355	3.31925e-14	2.7914e-13
109050	Inka2	1.34333	3.48694	57.5272	3.33336e-14	2.80173e-13
101631	Pwwp2b	1.55944	3.74334	57.5187	3.34789e-14	2.81241e-13
213056	Fam126b	0.955373	4.94413	57.5137	3.3564e-14	2.81802e-13
235415	Cplx3	4.30468	1.17275	57.471	3.43002e-14	2.87826e-13
380728	Kcnh4	4.78955	-0.0458709	57.4433	3.47865e-14	2.91749e-13
13663	Ei24	0.677498	6.19574	57.4212	3.51796e-14	2.94885e-13
230837	Asap3	-0.816316	5.00161	57.3696	3.61154e-14	3.02564e-13
245049	Myrip	6.14483	0.14358	57.3679	3.61452e-14	3.0265e-13
83945	Dnaja3	0.782445	5.77749	57.3463	3.65449e-14	3.05831e-13
17701	Msx1	1.05999	4.5698	57.3315	3.6822e-14	3.07982e-13
207592	Tbc1d16	0.916904	5.07829	57.2703	3.79843e-14	3.17532e-13
242506	Frmd3	2.10829	1.82174	57.2676	3.80375e-14	3.17804e-13
14747	Cmklr1	1.37228	2.97369	57.2549	3.82839e-14	3.19689e-13
83602	Gtf2a1	0.72956	5.41827	57.2533	3.83136e-14	3.19764e-13
217310	Hid1	1.28197	3.79777	57.2378	3.86184e-14	3.22133e-13
17760	Map6	-0.772792	5.0459	57.211	3.91467e-14	3.26364e-13
228785	Mylk2	3.51974	1.31015	57.1956	3.94545e-14	3.28752e-13
20932	Surf4	-0.643171	8.145	57.0976	4.14702e-14	3.45361e-13
242425	Gabbr2	8.17056	-0.692899	56.8937	4.60018e-14	3.82893e-13
56543	Kcnd3	4.09978	1.98473	56.7927	4.84268e-14	4.0286e-13
60510	Syt9	4.52362	0.861598	56.7477	4.95458e-14	4.11946e-13
21888	Tle4	1.39705	2.84286	56.7282	5.00418e-14	4.15846e-13
67622	Mxra7	-0.85433	5.40315	56.6673	5.16145e-14	4.28684e-13
240660	Slc35g1	1.70706	2.0694	56.6514	5.20331e-14	4.31928e-13
15982	Ifrd1	0.82679	5.25079	56.6376	5.23992e-14	4.34733e-13
329934	Foxo6	1.96219	2.11834	56.5617	5.44626e-14	4.51609e-13
66383	Iscu	0.718952	5.95002	56.5481	5.48402e-14	4.54495e-13
76184	Abca6	2.30778	2.07196	56.4507	5.7626e-14	4.77327e-13
66058	Tmem176a	-0.693532	6.51545	56.4033	5.9032e-14	4.8871e-13
58801	Pmaip1	1.39234	3.36514	56.378	5.97955e-14	4.94765e-13
69195	Tmem121	-1.51811	3.01714	56.3128	6.18114e-14	5.11171e-13
218885	Oxnad1	1.02446	3.66222	56.2594	6.35126e-14	5.24958e-13
231086	Hadhb	0.671927	6.77614	56.2063	6.5252e-14	5.3883e-13
114584	Clic1	-0.730859	6.8475	56.206	6.52608e-14	5.3883e-13
108946	Zzz3	-0.688119	6.90993	56.1901	6.5792e-14	5.42925e-13
117167	Steap4	-1.30367	6.90819	56.1745	6.63154e-14	5.46951e-13
12569	Cdk5r1	1.42847	3.04918	56.1463	6.72748e-14	5.54567e-13
22381	Tceal9	-0.785647	6.35881	56.1095	6.85464e-14	5.64748e-13
68349	Ndufs3	0.722775	5.75825	56.0809	6.95484e-14	5.72697e-13
18601	Padi3	3.94329	0.473196	56.0741	6.97921e-14	5.74397e-13
74175	Crct1	4.43264	1.45804	56.0623	7.02117e-14	5.77542e-13
56278	Gkap1	0.852406	4.5864	56.0491	7.0682e-14	5.811e-13
12297	Cacnb3	-0.80132	5.41725	56.0393	7.10354e-14	5.83694e-13
26377	Dapp1	-1.53006	3.14936	56.0215	7.16835e-14	5.88706e-13
232288	Frmd4b	1.77643	2.20511	56.0089	7.21432e-14	5.91736e-13
18707	Pik3cd	-1.45663	2.62888	56.0084	7.21635e-14	5.91736e-13
18673	Phb	0.720238	6.43558	56.0082	7.21676e-14	5.91736e-13
26408	Map3k5	2.26512	3.63258	55.9702	7.35778e-14	6.02978e-13
12845	Comp	0.723017	9.1013	55.8912	7.65957e-14	6.27377e-13
192185	Nadk	0.635905	7.29411	55.8694	7.74484e-14	6.34024e-13
17172	Ascl1	8.10432	-0.775714	55.8079	7.9909e-14	6.5382e-13
99296	Hrh3	8.17999	-0.668001	55.7671	8.15867e-14	6.67193e-13
217124	Ppp1r9b	0.8341	7.67867	55.7492	8.23309e-14	6.72922e-13
108954	Ppp1r15b	0.731507	6.29619	55.6993	8.44492e-14	6.8987e-13
74182	Gpcpd1	0.720445	5.46405	55.6905	8.48266e-14	6.92586e-13
212167	Gsap	-1.91868	2.9703	55.6785	8.53471e-14	6.96466e-13
213575	Dync2li1	-0.792547	4.88575	55.6566	8.63025e-14	7.0389e-13
213649	Arhgef19	-1.10361	4.22303	55.6452	8.68043e-14	7.07609e-13
17345	Mki67	-0.77781	6.34649	55.5284	9.21173e-14	7.50522e-13
102278	Cpne7	4.48006	0.877412	55.5093	9.30203e-14	7.57479e-13
18675	Phex	2.21565	1.91366	55.4398	9.63643e-14	7.84295e-13
15937	Ier3	-1.43087	5.32674	55.4341	9.66471e-14	7.86182e-13
109299	Tmem250-ps	0.835504	5.09106	55.2406	1.06643e-13	8.6704e-13
75605	Kdm5b	-0.773699	7.14141	55.1778	1.10105e-13	8.94709e-13
50523	Lats2	-0.733428	7.1626	55.1343	1.12571e-13	9.14266e-13
14373	G0s2	1.82894	6.53529	55.0092	1.19966e-13	9.73818e-13
667034	Pnp2	-1.28789	2.92097	54.8803	1.28096e-13	1.03926e-12
13143	Dapk2	1.51273	2.67404	54.8549	1.29767e-13	1.05227e-12
71770	Ap2b1	-0.674414	7.73327	54.8121	1.32623e-13	1.07486e-12
27402	Pdhx	0.842208	4.72347	54.7955	1.33746e-13	1.08339e-12
78753	Lipm	8.10746	-0.728393	54.7942	1.33838e-13	1.08357e-12
269295	Rtn4rl2	-1.24375	3.79693	54.7462	1.37142e-13	1.10974e-12
330863	Trim67	7.36669	1.58111	54.6432	1.44522e-13	1.16884e-12
232078	Thnsl2	-1.07696	3.59293	54.5517	1.51414e-13	1.22393e-12
17305	Mfng	6.53467	1.45689	54.487	1.56481e-13	1.26423e-12
268595	D430019H16Rik	2.08174	1.60225	54.4403	1.60245e-13	1.29397e-12
18602	Padi4	6.2645	-0.388731	54.4299	1.61091e-13	1.30012e-12
223838	Adamts20	1.84088	2.0455	54.3922	1.64216e-13	1.32464e-12
21813	Tgfbr2	-0.887226	8.85977	54.3575	1.67137e-13	1.34749e-12
108089	Rnf144a	0.781705	6.57892	54.3565	1.67224e-13	1.34749e-12
15980	Ifngr2	-0.699542	5.36748	54.3042	1.71731e-13	1.38309e-12
94044	Bcl2l13	0.708958	5.80638	54.2464	1.76865e-13	1.42369e-12
56428	Mtch2	0.616029	6.98745	54.1953	1.81524e-13	1.46044e-12
27387	Sh2d3c	1.71247	2.19789	54.1051	1.90044e-13	1.52818e-12
16367	Irs1	0.675344	7.6362	54.0842	1.92084e-13	1.54378e-12
207792	BC034090	-0.731527	5.20293	54.0598	1.94481e-13	1.56223e-12
21353	Tank	0.747473	5.60837	54.033	1.97155e-13	1.58289e-12
213556	Plekhh2	-0.761612	6.83259	53.9913	2.0138e-13	1.61596e-12
21385	Tbx2	2.1581	3.07818	53.9779	2.02754e-13	1.62615e-12
66945	Sdha	0.725595	8.00906	53.9429	2.064e-13	1.65452e-12
66958	Tmx2	0.672958	5.56332	53.9166	2.09186e-13	1.67599e-12
110157	Raf1	0.622458	7.06136	53.9043	2.10494e-13	1.68559e-12
12831	Col5a1	-0.672606	9.53179	53.8818	2.1292e-13	1.70413e-12
56419	Diaph3	-0.850086	4.45998	53.8319	2.18397e-13	1.74707e-12
71998	Slc25a35	1.39706	3.20892	53.8247	2.19201e-13	1.75259e-12
56363	Tmeff2	1.53137	2.4206	53.7971	2.22305e-13	1.77648e-12
20680	Sox7	3.96935	0.478357	53.7687	2.25538e-13	1.80138e-12
99371	Arfgef2	-0.64887	6.63459	53.7666	2.25776e-13	1.80235e-12
26561	Mmp23	-0.669336	6.09767	53.7036	2.33132e-13	1.86011e-12
20519	Slc22a3	8.0514	-0.82146	53.6955	2.34098e-13	1.86685e-12
12159	Bmp4	2.56324	1.71599	53.674	2.36677e-13	1.88644e-12
319625	Galm	1.12199	3.94614	53.6723	2.36884e-13	1.88711e-12
21953	Tnni2	1.08905	4.95352	53.6661	2.37632e-13	1.8921e-12
217837	Itpk1	1.14589	4.34983	53.6615	2.38185e-13	1.89552e-12
66455	Cnpy4	-0.73238	5.22629	53.5674	2.49869e-13	1.98747e-12
109254	Adtrp	6.28346	-0.348779	53.5481	2.52343e-13	2.00612e-12
76294	Asb5	1.04603	4.03193	53.5405	2.53317e-13	2.01282e-12
11951	Atp5g1	0.794377	6.4312	53.5313	2.54509e-13	2.02125e-12
67888	Tmem100	4.11804	0.859727	53.5026	2.58253e-13	2.04993e-12
11854	Rhod	-0.954293	4.43845	53.4628	2.6354e-13	2.09082e-12
11946	Atp5a1	0.713109	9.37012	53.432	2.67695e-13	2.12269e-12
14605	Tsc22d3	0.674635	5.69968	53.3593	2.77796e-13	2.19977e-12
15529	Sdc2	0.747448	8.74713	53.3589	2.77843e-13	2.19977e-12
50917	Galns	-0.856309	4.42191	53.3589	2.77843e-13	2.19977e-12
326623	Tnfsf15	5.33462	0.415137	53.3577	2.78026e-13	2.20009e-12
66107	Wfdc21	9.7888	3.95489	53.3128	2.84442e-13	2.2497e-12
16506	Kcnd1	-1.18172	3.37886	53.2821	2.88925e-13	2.28399e-12
80861	Dhx58	-1.18051	3.51475	53.2147	2.9902e-13	2.36258e-12
381924	Itgad	4.95489	0.231296	53.209	2.99875e-13	2.36812e-12
66046	Ndufb5	0.69353	5.62076	53.1333	3.1167e-13	2.46001e-12
66180	P3h4	-0.624237	6.93611	53.0826	3.19814e-13	2.523e-12
69597	Afg3l2	0.667878	6.19007	53.0456	3.25898e-13	2.56968e-12
12950	Hapln1	-2.1898	2.49055	52.9825	3.3653e-13	2.65189e-12
56417	Adar	-0.668619	6.03055	52.9817	3.36668e-13	2.65189e-12
20955	Vamp7	-0.827025	4.8007	52.9545	3.41366e-13	2.68752e-12
23908	Hs2st1	-0.631584	6.24	52.912	3.48825e-13	2.74484e-12
13829	Dmtn	1.90621	2.45603	52.9037	3.50305e-13	2.75508e-12
268783	Mtmr12	-0.756786	5.26333	52.8932	3.52192e-13	2.7685e-12
108657	Rnpepl1	0.726889	5.71806	52.8242	3.64776e-13	2.86596e-12
67003	Uqcrc2	0.735098	7.18866	52.8072	3.67943e-13	2.88814e-12
381677	Vgf	-1.60283	3.46362	52.8071	3.67973e-13	2.88814e-12
319277	Washc4	-0.675615	6.59548	52.548	4.19855e-13	3.29367e-12
83554	Fstl3	-1.44618	2.66205	52.4726	4.3629e-13	3.42086e-12
18933	Prrx1	0.692328	9.80529	52.447	4.42011e-13	3.46396e-12
241639	Fermt1	7.99296	-0.863603	52.4294	4.46006e-13	3.49349e-12
242608	Podn	-0.700802	8.08195	52.4177	4.48667e-13	3.51255e-12
226841	Vash2	0.779178	4.89575	52.3874	4.55627e-13	3.56522e-12
77619	Prelid2	-1.47421	2.78584	52.3805	4.57252e-13	3.57612e-12
54159	Rnase2b	7.91944	-0.941852	52.3703	4.59625e-13	3.59286e-12
17869	Myc	0.908272	5.47496	52.3618	4.61626e-13	3.60667e-12
237459	Cdk17	-0.749076	5.74563	52.3485	4.64763e-13	3.62935e-12
12801	Cnr1	3.1583	1.67034	52.3113	4.73651e-13	3.69688e-12
76282	Gpt	1.71082	2.85826	52.2464	4.89559e-13	3.81911e-12
13653	Egr1	-1.05704	6.37687	52.2415	4.90772e-13	3.82664e-12
347722	Agap1	0.703491	5.17313	52.2239	4.95197e-13	3.85918e-12
68169	Ndnf	0.833185	5.06462	52.1401	5.16777e-13	4.02533e-12
14751	Gpi1	-0.627266	8.64941	52.1382	5.17298e-13	4.02735e-12
227659	Slc2a6	1.51106	2.60996	51.9651	5.64949e-13	4.3961e-12
72461	Prcp	-0.876938	4.59785	51.9282	5.75688e-13	4.47741e-12
74610	Abcb8	0.929181	4.77575	51.8601	5.95986e-13	4.63294e-12
12869	Cox8b	2.03046	2.23053	51.8466	6.00103e-13	4.66259e-12
241770	Rims4	4.35566	0.354149	51.8322	6.04528e-13	4.69461e-12
16174	Il18rap	-2.31551	2.07272	51.8181	6.08866e-13	4.72591e-12
11747	Anxa5	-0.678371	7.99378	51.7564	6.28316e-13	4.87443e-12
239188	Enox1	1.34613	3.15453	51.7129	6.42406e-13	4.98123e-12
21916	Tmod1	1.52732	3.07566	51.6968	6.47691e-13	5.01968e-12
404634	Macroh2a2	-0.913515	5.00422	51.6793	6.53491e-13	5.06209e-12
104079	Nxph3	3.53542	2.40776	51.6507	6.63067e-13	5.13369e-12
66168	Grina	0.63458	7.94927	51.6379	6.67404e-13	5.16467e-12
22158	Tulp3	-0.707869	6.38285	51.6255	6.71641e-13	5.19485e-12
72900	Ndufv2	0.703901	6.24187	51.6123	6.76169e-13	5.22726e-12
22346	Vhl	-0.685843	5.46301	51.5615	6.93877e-13	5.36146e-12
17475	Mpdz	-0.666887	6.55058	51.5528	6.96986e-13	5.38278e-12
231293	Cwh43	7.98538	-0.864145	51.548	6.98662e-13	5.39303e-12
66569	Gdpd1	1.52901	3.15803	51.5292	7.05394e-13	5.44227e-12
269593	Luzp1	-0.627329	6.89911	51.4256	7.4362e-13	5.73432e-12
[truncated: 13,416 more rows]

## Sheet: 7c_4m
Entrez ID	Gene_symbol	logFC	logCPM	LR	P.Value	FDR
21838	Thy1	3.83795	9.72786	1412.08	0	8.84707e-307
16323	Inhba	3.88433	6.96255	1406.27	9.10795e-308	1.59544e-305
114301	Palmd	-5.57276	5.77892	1406.23	9.3152e-308	1.61341e-305
16803	Lbp	-3.42007	6.33951	1405.16	1.58542e-307	2.71547e-305
71795	Pitpnc1	3.31198	6.67201	1402.96	4.77939e-307	8.09607e-305
228662	Btbd3	-3.36599	7.31943	1392.73	7.97898e-305	1.33691e-302
387314	Tmtc1	3.76031	6.89796	1386.23	2.05985e-303	3.41426e-301
330812	Rnf150	-4.33913	5.43435	1384.38	5.21483e-303	8.55176e-301
66425	Pcp4l1	-7.8827	5.94837	1378.39	1.04417e-301	1.69431e-299
78749	Filip1l	3.29552	7.54381	1377.87	1.35362e-301	2.17355e-299
69217	Plekha4	-6.55563	5.94968	1368	1.88462e-299	2.995e-297
235633	Als2cl	-6.34013	5.5996	1362.03	3.74595e-298	5.89223e-296
16878	Lif	5.88889	4.80011	1361.25	5.52367e-298	8.60074e-296
66259	Camk2n1	4.21352	7.39311	1341.59	1.03687e-293	1.59834e-291
270097	Vat1l	6.69285	4.39134	1340.85	1.499e-293	2.28783e-291
54403	Slc4a4	3.53479	5.7983	1331.89	1.32689e-291	2.0053e-289
13614	Edn1	3.78171	5.86857	1330.02	3.39018e-291	5.07375e-289
241226	Itga8	3.56014	7.05861	1310.81	5.06398e-287	7.5059e-285
244954	Prss35	7.55313	7.95118	1305.77	6.30368e-286	9.2544e-284
230103	Npr2	-3.33931	7.46775	1293.13	3.51475e-283	5.11131e-281
213945	Col28a1	-4.59639	5.16581	1289.52	2.13937e-282	3.08209e-280
20855	Stc1	4.70078	8.17017	1276.72	1.29514e-279	1.84858e-277
234214	Sorbs2	-5.23667	7.13833	1268.59	7.57754e-278	1.07163e-275
171508	Creld1	4.60661	8.28383	1258.95	9.3974e-276	1.31692e-273
24059	Slco2a1	3.55342	6.63112	1250.96	5.14392e-274	7.14356e-272
208777	Sned1	-3.21708	9.31044	1250.63	6.05175e-274	8.32926e-272
23893	Grem2	5.77188	8.49992	1242.7	3.20709e-272	4.37498e-270
319504	Nrcam	6.54361	4.47782	1241.85	4.89058e-272	6.61301e-270
56405	Dusp14	4.34043	5.75061	1227.95	5.14184e-269	6.8923e-267
16560	Kif1a	3.41667	5.94122	1227.13	7.72978e-269	1.02719e-266
320309	1520401A03Rik	-6.74807	5.56857	1219.54	3.45899e-267	4.5573e-265
231162	Cytl1	-13.1028	3.94836	1215.31	2.8664e-266	3.74454e-264
12839	Col9a1	-13.2533	4.05527	1208.28	9.66645e-265	1.25217e-262
54357	Epb41l4b	-7.16991	5.23895	1208.04	1.09304e-264	1.4041e-262
78255	Ralgps2	4.2008	4.99073	1206.52	2.33022e-264	2.96862e-262
21824	Thbd	3.66552	9.6164	1206.25	2.67094e-264	3.3748e-262
216505	Pik3ip1	-4.37921	5.0634	1205.83	3.29619e-264	4.13096e-262
64074	Smoc2	-7.14264	8.98378	1201.6	2.74149e-263	3.40807e-261
53614	Reck	-3.30856	8.03272	1190.06	8.84168e-261	1.09036e-258
77569	Limch1	-4.03721	5.2589	1187.3	3.50646e-260	4.28985e-258
214642	Cped1	-3.67939	5.26274	1177.96	3.75244e-258	4.55463e-256
12778	Ackr3	4.25274	7.52251	1174.14	2.54977e-257	3.07068e-255
27062	Cadps	9.5987	3.94582	1166.57	1.12227e-255	1.34107e-253
13479	Dpep1	3.15252	7.14804	1164.75	2.80041e-255	3.32064e-253
64058	Perp	5.25496	6.87821	1164.11	3.84765e-255	4.52759e-253
231440	Parm1	5.07411	5.66399	1159.37	4.12057e-254	4.81202e-252
50493	Txnrd1	3.0432	8.82928	1142.68	1.75056e-250	2.02894e-248
11602	Angpt4	3.4614	7.73599	1140.49	5.23842e-250	6.02614e-248
216227	Slc17a8	12.9625	3.84355	1139.06	1.07024e-249	1.22205e-247
70370	Fbln7	5.20796	6.59893	1136.61	3.6434e-249	4.12964e-247
20315	Cxcl12	-3.49955	9.72842	1134.55	1.0205e-248	1.14825e-246
14221	Fjx1	4.07486	5.21902	1133.34	1.87696e-248	2.09662e-246
17880	Myh11	4.38739	5.18133	1129.92	1.03608e-247	1.14901e-245
218461	Pde8b	5.30217	5.55943	1124.12	1.89218e-246	2.08342e-244
11541	Adora2b	5.49519	5.04166	1119.61	1.80992e-245	1.97872e-243
494504	Apcdd1	5.23215	6.52255	1106.85	1.07111e-242	1.16275e-240
16948	Lox	-2.78834	10.1302	1098.31	7.70771e-241	8.30869e-239
21743	Inmt	7.15868	4.2342	1092.88	1.16761e-239	1.24991e-237
12326	Camk4	-3.38243	6.66966	1089.95	5.04253e-239	5.36073e-237
53412	Ppp1r3c	-6.89723	6.88411	1089.5	6.31675e-239	6.66936e-237
232409	Clec2e	12.8977	3.75984	1088.53	1.02556e-238	1.07544e-236
57349	Ppbp	6.7337	4.09024	1085.38	4.96596e-238	5.17231e-236
14573	Gdnf	5.69954	4.65298	1082.74	1.8654e-237	1.92988e-235
108760	Galnt16	3.87814	5.46195	1080.4	5.99698e-237	6.16289e-235
12824	Col2a1	-9.63953	9.16469	1075.05	8.72466e-236	8.90667e-234
16598	Klf2	-3.92507	5.13544	1073.44	1.95916e-235	1.98687e-233
12822	Col18a1	4.56932	7.55404	1071.35	5.58133e-235	5.62328e-233
11468	Actg2	4.02734	5.64089	1070.85	7.1693e-235	7.17629e-233
12575	Cdkn1a	3.31067	7.93788	1069.14	1.68747e-234	1.67822e-232
116903	Calcb	11.308	3.7588	1067.97	3.01606e-234	2.9803e-232
20256	Clec11a	-6.55833	6.41818	1061.95	6.15335e-233	6.04165e-231
237360	Adamts14	4.55661	5.24136	1061.74	6.84111e-233	6.67441e-231
218772	Rarb	8.44805	6.72681	1051.61	1.0881e-230	1.05491e-228
107765	Ankrd1	3.14489	7.15008	1048.64	4.81388e-230	4.63787e-228
12845	Comp	-9.85605	8.4767	1030.08	5.2045e-226	4.98307e-224
242653	Cldn19	-9.2178	3.76703	1027.68	1.72862e-225	1.64485e-223
212073	Syne3	-4.57815	5.00192	1015.18	8.99239e-223	8.50415e-221
66695	Aspn	-6.09777	8.54384	1015.15	9.12549e-223	8.57741e-221
78798	Eml4	2.88966	7.25028	1011.01	7.25195e-222	6.75376e-220
14586	Gfra2	-6.84133	4.55928	1011.01	7.27295e-222	6.75376e-220
71145	Scara5	-8.5504	3.78302	1010.56	9.0759e-222	8.37755e-220
110596	Arhgef28	-3.8117	4.97475	1010.28	1.04712e-221	9.60796e-220
210622	Pamr1	3.43199	5.75816	1006.71	6.26056e-221	5.71045e-219
19223	Ptgis	-3.06241	6.52821	1004.24	2.14875e-220	1.94841e-218
14371	Fzd9	-7.23344	4.01041	1000.23	1.601e-219	1.44324e-217
50909	C1ra	-2.67738	6.72885	999.732	2.05332e-219	1.84023e-217
19242	Ptn	-4.07206	5.71408	987.867	7.79111e-217	6.94219e-215
21923	Tnc	2.88378	10.8813	987.679	8.56076e-217	7.58414e-215
211323	Nrg1	3.84094	4.67493	982.546	1.11749e-215	9.84346e-214
12310	Calca	12.6887	3.56681	981.603	1.79121e-215	1.56883e-213
66894	Wwp2	-3.98294	7.86795	976.68	2.10517e-214	1.8334e-212
73998	Herc3	3.73403	4.92178	970.848	3.89982e-213	3.37729e-211
23948	Mmp17	4.1751	4.47668	963.595	1.47098e-211	1.26677e-209
108030	Lin7a	7.40167	4.30613	963.041	1.94085e-211	1.66213e-209
19275	Ptprn	3.15904	5.63694	962.118	3.0803e-211	2.62336e-209
14160	Lgr5	4.60393	5.76941	961.802	3.60874e-211	3.05653e-209
12258	Serping1	-2.80842	7.65417	960.145	8.27048e-211	6.96663e-209
242050	Igsf10	-3.54629	5.17259	959.735	1.01554e-210	8.50789e-209
218454	Lhfpl2	2.93999	5.95806	957.406	3.25743e-210	2.71423e-208
224093	Fam43a	-2.95831	6.60311	956.023	6.5093e-210	5.39467e-208
56089	Ramp3	7.43354	6.15585	953.097	2.81526e-209	2.32071e-207
17751	Mt3	9.65806	3.73376	950.216	1.19089e-208	9.76469e-207
14264	Fmod	-3.69083	8.74982	949.439	1.75632e-208	1.43247e-206
20198	S100a4	-3.67577	7.04318	945.478	1.27553e-207	1.03486e-205
12111	Bgn	-2.55345	11.698	942.971	4.4749e-207	3.61155e-205
20679	Sox6	-5.29366	5.0571	923.681	6.98167e-203	5.60534e-201
108075	Ltbp4	-3.77768	5.86738	921.229	2.38255e-202	1.90295e-200
12705	Cited1	8.24532	3.66843	919.231	6.47436e-202	5.14445e-200
72565	Uaca	2.7974	7.49442	916.074	3.14465e-201	2.48589e-199
226090	Ermp1	2.56442	7.30731	911.562	3.00833e-200	2.36599e-198
54156	Egfl6	-6.77046	4.50426	911.2	3.60609e-200	2.82172e-198
320253	Marchf3	-3.64365	4.75075	907.413	2.40118e-199	1.8694e-197
19716	Bex1	7.82393	6.12427	905.872	5.1912e-199	4.02123e-197
22160	Twist1	3.55491	9.3553	903.656	1.57397e-198	1.21314e-196
12933	Crmp1	8.41746	3.83542	903.058	2.12382e-198	1.62879e-196
17183	Matn4	-11.9194	8.32252	901.686	4.22064e-198	3.22085e-196
76901	Jade2	-3.97322	4.72544	896.052	7.08081e-197	5.37688e-195
63959	Slc29a1	-3.73638	4.93947	893.641	2.36713e-196	1.78869e-194
14658	Glrb	5.21656	5.57572	892.469	4.25553e-196	3.19995e-194
93960	Nkd1	3.43527	6.12996	891.899	5.65983e-196	4.23525e-194
245857	Ssh3	-3.88722	4.43436	891.454	7.07258e-196	5.26685e-194
11754	Aoc3	-4.51603	5.5357	890.739	1.01153e-195	7.49654e-194
20322	Sord	3.1886	5.19586	887.06	6.38186e-195	4.707e-193
12338	Capn6	-3.17077	6.3594	885.428	1.44433e-194	1.06021e-192
23892	Grem1	4.40485	7.89512	880.711	1.53106e-193	1.11855e-191
210808	Lacc1	3.54525	5.47707	879.522	2.77685e-193	2.01911e-191
12606	Cebpa	-3.76833	5.33976	877.797	6.5852e-193	4.76577e-191
104816	Aspg	-6.5996	4.35205	872.538	9.15914e-192	6.59757e-190
100504464	E230016K23Rik	-8.04925	3.51454	870.527	2.50569e-191	1.79652e-189
242109	Zfp697	3.82774	5.40611	869.727	3.73968e-191	2.66885e-189
319520	Dusp4	3.99956	4.67643	869.679	3.83115e-191	2.72153e-189
68178	Cgnl1	3.02177	8.37291	866.466	1.91366e-190	1.35317e-188
83671	Sytl2	3.37793	5.87815	864.071	6.34592e-190	4.46677e-188
230971	Megf6	-4.20288	5.37829	862.396	1.4678e-189	1.02846e-187
23882	Gadd45g	2.91181	8.57517	859.166	7.39211e-189	5.15608e-187
380912	Zfp395	-2.95994	5.46295	851.646	3.18895e-187	2.21431e-185
14062	F2r	3.22198	9.14322	849.653	8.64835e-187	5.97822e-185
20540	Slc7a7	4.79533	5.18039	849.398	9.82524e-187	6.76143e-185
57764	Ntn4	3.49855	6.48444	843.8	1.61989e-185	1.10981e-183
83675	Bicc1	-2.32015	8.73935	841.275	5.73225e-185	3.90985e-183
17384	Mmp10	9.35345	3.41837	839.991	1.0902e-184	7.40328e-183
54140	Avpr1a	-4.54558	5.39123	839.66	1.28701e-184	8.70142e-183
380916	Lrch1	-2.92049	5.40911	836.986	4.90696e-184	3.30309e-182
237175	Adgrg2	-4.2175	5.05148	835.932	8.31944e-184	5.57583e-182
12164	Bmp8b	8.3538	3.77639	832.926	3.74557e-183	2.49948e-181
20753	Sprr1a	7.24251	3.64819	829.55	2.02972e-182	1.34862e-180
11816	Apoe	-3.0209	6.86783	828.971	2.71281e-182	1.79476e-180
229949	Ak5	-4.46027	5.63338	825.887	1.27028e-181	8.36811e-180
17988	Ndrg1	-3.14656	6.81655	820.278	2.1049e-180	1.38072e-178
66141	Ifitm3	-2.46471	7.66909	818.984	4.0249e-180	2.62897e-178
116847	Prelp	-4.33714	8.67042	818.572	4.94569e-180	3.21678e-178
16011	Igfbp5	-3.47758	12.0923	818.075	6.34151e-180	4.10733e-178
320508	Cachd1	3.16859	5.80451	814.15	4.52569e-179	2.91897e-177
14119	Fbn2	-3.13574	8.35976	813.982	4.92228e-179	3.16154e-177
11732	Ank	-2.61717	6.65937	813.109	7.6192e-179	4.87344e-177
13609	S1pr1	3.00283	6.44545	804.914	4.6088e-177	2.93573e-175
16956	Lpl	-3.37165	6.66236	803.771	8.16958e-177	5.18247e-175
14734	Gpc3	3.76315	6.8478	803.465	9.52e-177	6.01437e-175
19219	Ptger4	2.81495	6.15395	802.161	1.82948e-176	1.15108e-174
83397	Akap12	2.93637	8.47165	798.622	1.07537e-175	6.73855e-174
13661	Ehf	-9.35884	3.36781	790.322	6.86041e-174	4.2815e-172
11932	Atp1b2	-4.97381	4.66598	789.842	8.7236e-174	5.42235e-172
232345	A2m	-7.6025	3.65192	786.28	5.18874e-173	3.21223e-171
14268	Fn1	-2.40404	14.2641	784.739	1.12225e-172	6.91978e-171
22413	Wnt2	10.0504	3.25638	775.033	1.44689e-170	8.88598e-169
12840	Col9a2	-8.67004	3.6014	772.787	4.4553e-170	2.72533e-168
12955	Cryab	3.36787	9.06824	772.397	5.41388e-170	3.29862e-168
226610	Fam78b	3.95056	4.19678	771.316	9.3042e-170	5.64662e-168
17386	Mmp13	4.69823	6.4848	770.775	1.21976e-169	7.37357e-168
22419	Wnt5b	-4.53026	4.17285	770.421	1.45588e-169	8.76655e-168
14456	Gas6	-3.22382	10.7988	767.262	7.07933e-169	4.24622e-167
218865	Chdh	-9.32462	3.33795	760.317	2.29115e-167	1.36892e-165
109042	Cavin3	-3.07058	6.30034	760.03	2.64619e-167	1.57494e-165
20713	Serpini1	5.40758	4.75935	759.741	3.05689e-167	1.81238e-165
226778	Mark1	2.45095	6.89218	754.775	3.67366e-166	2.16971e-164
56758	Mbnl1	-2.32233	8.12066	753.64	6.48654e-166	3.81641e-164
21949	Tnfsf8	8.25217	3.47485	748.651	7.88285e-165	4.62031e-163
18008	Nes	2.72008	5.65751	747.574	1.35152e-164	7.89153e-163
320024	Nceh1	2.75206	6.15035	747.066	1.74335e-164	1.0141e-162
627626	Ptchd4	4.21	5.13905	746.828	1.96413e-164	1.13823e-162
74645	Tent5c	3.4045	5.52278	744.667	5.79361e-164	3.34489e-162
433022	Plcxd2	3.37452	4.61427	742.783	1.4881e-163	8.55938e-162
19734	Rgs16	3.38794	5.90704	742.195	1.99791e-163	1.1449e-161
79201	Tnfrsf23	2.72842	6.29281	740.181	5.47672e-163	3.1268e-161
330267	Thsd7a	-2.92612	5.9526	737.338	2.27304e-162	1.29295e-160
26968	Islr	-2.63926	7.45147	736.832	2.92786e-162	1.6593e-160
30923	Foxe3	9.15699	3.22808	736.501	3.45555e-162	1.95118e-160
12609	Cebpd	-2.88897	7.49037	736.445	3.55495e-162	1.99998e-160
12654	Chil1	-9.14089	8.10598	735.656	5.27708e-162	2.95804e-160
14397	Gabra4	8.1668	3.37501	731.4	4.44447e-161	2.4823e-159
241556	Tspan18	3.15766	4.82602	730.84	5.88245e-161	3.27357e-159
215632	Psd4	-7.04727	3.26885	729.378	1.22289e-160	6.78089e-159
27047	Omd	-5.74566	6.97981	727.606	2.97055e-160	1.64126e-158
14778	Gpx3	-3.40631	11.8801	727.379	3.32763e-160	1.83198e-158
233744	Spon1	4.3425	4.13313	721.949	5.04424e-159	2.76715e-157
18481	Pak3	-3.1645	6.02719	721.145	7.54641e-159	4.1251e-157
213783	Plekhg1	3.36529	5.6259	721.044	7.93519e-159	4.32229e-157
73379	Dcbld2	2.48509	7.6611	718.433	2.93389e-158	1.59246e-156
209773	Dennd2a	2.48574	6.27056	717.265	5.26399e-158	2.84717e-156
12006	Axin2	4.48613	6.23997	715.916	1.03429e-157	5.57467e-156
15558	Htr2a	4.74682	4.98376	714.846	1.76782e-157	9.4951e-156
56188	Fxyd1	-5.30539	4.17464	713.991	2.71184e-157	1.45149e-155
67374	Jam2	2.86474	5.04896	711.426	9.79494e-157	5.22453e-155
15904	Id4	3.49525	6.36981	707.489	7.03372e-156	3.73878e-154
12457	Noct	3.03477	7.10819	706.617	1.08844e-155	5.76573e-154
238871	Pde4d	2.88193	5.75753	705.914	1.5475e-155	8.16942e-154
54712	Plxnc1	4.9662	5.08756	705.049	2.38695e-155	1.25579e-153
110751	Adam33	3.96573	4.46811	704.719	2.81601e-155	1.47649e-153
11861	Arl4a	2.8164	4.91737	704.391	3.3173e-155	1.73343e-153
237979	Sdk2	-6.14811	4.39864	701.028	1.7869e-154	9.30575e-153
66522	Pgpep1	2.30613	6.81416	700.845	1.95844e-154	1.01647e-152
50790	Acsl4	2.53307	7.17596	700.312	2.55736e-154	1.32288e-152
381511	Pdp1	-3.18213	6.3943	697.882	8.63499e-154	4.45178e-152
16526	Kcnk2	-3.72798	5.27979	695.446	2.92459e-153	1.50275e-151
56741	Igdcc4	-3.67466	5.0718	694.458	4.79461e-153	2.45544e-151
19252	Dusp1	2.50708	7.3071	689.513	5.70287e-152	2.91092e-150
210297	Lrch2	2.96125	6.28784	689.393	6.05705e-152	3.0815e-150
22418	Wnt5a	2.27483	7.61305	688.068	1.17593e-151	5.9628e-150
18542	Pcolce	-2.27912	8.46841	686.896	2.11535e-151	1.06912e-149
399603	Lratd2	4.39471	3.77278	686.629	2.41749e-151	1.21783e-149
66054	Cndp2	2.58061	6.33767	684.727	6.26694e-151	3.14674e-149
244237	Tnfrsf26	2.96471	5.08662	677.401	2.45529e-149	1.22884e-147
19668	Rbpjl	-12.067	2.92639	677.358	2.50856e-149	1.25144e-147
14013	Mecom	-2.44957	6.36585	676.125	4.6507e-149	2.3126e-147
16764	Aff3	-2.88773	6.34986	672.322	3.1239e-148	1.54839e-146
212996	Galnt17	3.41816	6.17736	672.17	3.37e-148	1.66502e-146
52668	Ifi27	-2.3263	6.73058	671.497	4.72071e-148	2.32491e-146
50908	C1s1	-2.38524	7.39969	669.041	1.61523e-147	7.92956e-146
12035	Bcat1	2.7024	5.80156	667.684	3.18556e-147	1.5589e-145
13885	Esd	2.46679	8.82278	665.846	7.99738e-147	3.90125e-145
229699	Slc16a4	-4.83426	3.73353	665.077	1.1756e-146	5.71666e-145
20408	Sh3gl3	5.01152	3.52973	664.013	2.00253e-146	9.70725e-145
105727	Slc38a1	3.53126	4.64313	663.054	3.23668e-146	1.56406e-144
12332	Capg	-2.13196	6.60756	662.875	3.54144e-146	1.70598e-144
69274	Ctdspl	-2.6567	5.81932	658.862	2.64087e-145	1.26819e-143
18163	Ctnnd2	5.96247	5.00338	654.838	1.98108e-144	9.48395e-143
65112	Pmepa1	3.78964	8.71042	654.411	2.45323e-144	1.17079e-142
58188	Vstm2b	8.48151	3.0748	653.19	4.52159e-144	2.15124e-142
19039	Lgals3bp	-2.81867	7.15476	652.983	5.01643e-144	2.37933e-142
14205	Vegfd	-3.88806	6.48625	652.585	6.12379e-144	2.89565e-142
18612	Etv4	3.96976	5.00317	652.427	6.62493e-144	3.12303e-142
16510	Kcnh1	7.36583	3.21197	651.648	9.78601e-144	4.59913e-142
18846	Plxna3	-3.88212	5.06312	648.604	4.49581e-143	2.10647e-141
330222	Sdk1	3.82624	4.80164	646.931	1.03888e-142	4.85282e-141
432530	Adcy1	5.65452	8.58623	645.873	1.76438e-142	8.2169e-141
215690	Nav1	2.37354	6.66421	644.395	3.69923e-142	1.71758e-140
70564	Prxl2a	4.71805	5.35717	643.865	4.82339e-142	2.23281e-140
107449	Unc5b	2.75095	7.74414	642.156	1.13532e-141	5.23983e-140
216565	Ehbp1	-2.58797	7.05775	640.816	2.22014e-141	1.0216e-139
20348	Sema3c	3.25369	9.57625	639.837	3.62527e-141	1.6632e-139
20564	Slit3	3.03912	8.69976	638.336	7.68795e-141	3.51661e-139
268709	Fam107a	-3.81855	4.0406	637.9	9.56425e-141	4.36192e-139
11898	Ass1	2.94224	5.36582	635.68	2.90758e-140	1.32213e-138
17294	Mest	-3.16684	5.77305	635.078	3.92934e-140	1.78149e-138
16170	Il16	-4.44767	4.33081	634.247	5.95976e-140	2.69412e-138
69908	Rab3b	5.43532	3.6875	631.617	2.22359e-139	1.00224e-137
68041	Mid1ip1	2.60212	5.14244	631.404	2.47446e-139	1.11206e-137
229488	Fhip1a	-4.06387	4.11428	629.536	6.30633e-139	2.82593e-137
11746	Anxa4	-2.74642	5.78511	629.282	7.16005e-139	3.19919e-137
407800	Ecm2	-7.30304	3.26815	628.577	1.01908e-138	4.54021e-137
22022	Tpst2	2.52707	6.75883	627.337	1.89703e-138	8.42729e-137
214791	Sertad4	-4.08322	5.4448	626.739	2.55866e-138	1.13338e-136
22401	Zmat3	2.13574	7.33004	625.322	5.20235e-138	2.29783e-136
14600	Ghr	-2.54744	6.80587	622.807	1.83357e-137	8.07558e-136
74760	Rab3il1	-3.60096	4.07165	619.825	8.16245e-137	3.58473e-135
22381	Tceal9	2.39121	8.07219	618.961	1.25847e-136	5.51118e-135
242553	Kank4	-6.20237	3.13922	618.78	1.37723e-136	6.01416e-135
12306	Anxa2	-2.22279	8.66211	618.266	1.78176e-136	7.75869e-135
14051	Eya4	-3.8169	4.20873	617.754	2.30285e-136	9.99955e-135
117606	Boc	-2.37424	7.03786	613.199	2.25372e-135	9.75872e-134
71780	Isyna1	-2.53295	5.62265	609.814	1.22772e-134	5.3012e-133
14609	Gja1	3.99415	8.14377	609.283	1.60199e-134	6.89797e-133
319939	Tns3	-2.45617	9.13437	609.065	1.78736e-134	7.67469e-133
100039795	Ildr2	4.66526	3.64486	606.836	5.45591e-134	2.33619e-132
21356	Tapbp	-2.34956	6.36142	605.022	1.3538e-133	5.78085e-132
227231	Cps1	11.8779	2.77302	604.072	2.17844e-133	9.27644e-132
269152	Kif26b	2.71212	6.8199	601.929	6.37074e-133	2.70537e-131
103172	Chchd10	6.60262	5.61876	601.865	6.57737e-133	2.78544e-131
14178	Fgf7	-2.43908	7.34655	601.504	7.88334e-133	3.32936e-131
20356	Sema5a	2.67398	6.84657	601.401	8.29985e-133	3.49569e-131
26561	Mmp23	-3.14507	5.20151	600.056	1.62758e-132	6.83629e-131
11486	Ada	3.04086	4.66247	599.738	1.90905e-132	7.99675e-131
233651	Dchs1	3.03658	6.2916	599.706	1.9402e-132	8.10521e-131
20324	Cavin2	1.97278	7.16754	599.486	2.1657e-132	9.02276e-131
224090	Tmem44	-3.91849	4.25286	597.187	6.84844e-132	2.84552e-130
67220	Plekho1	2.99145	5.85052	594.105	3.20658e-131	1.32875e-129
16476	Jun	2.7561	7.8697	593.188	5.07624e-131	2.09786e-129
81004	Tbl1xr1	-2.21932	6.98045	586.272	1.62105e-129	6.68141e-128
22061	Trp63	-5.76139	3.63446	586.072	1.79214e-129	7.3669e-128
12014	Bach2	3.84803	3.84801	585.538	2.34082e-129	9.59675e-128
51789	Tnk2	2.596	7.79634	585.284	2.65835e-129	1.08696e-127
24132	Zfp53	2.77678	5.33255	585.047	2.99483e-129	1.2213e-127
268451	Rab11fip4	-6.38917	4.24346	582.65	9.94467e-129	4.04478e-127
53881	Slc5a3	-3.27985	6.29488	582.473	1.08708e-128	4.40983e-127
11496	Adam22	3.90975	3.78741	582.218	1.23497e-128	4.99659e-127
29863	Pde7b	4.72998	5.72786	581.386	1.87308e-128	7.55852e-127
279653	Pcdh19	-2.07947	6.30482	580.265	3.28364e-128	1.3216e-126
207565	Camkk2	-2.23437	5.95433	575.592	3.41064e-127	1.36914e-125
18552	Pcsk5	-3.11722	6.3681	575.29	3.96907e-127	1.58917e-125
219140	Spata13	3.01147	5.23562	574.05	7.3859e-127	2.94958e-125
13123	Cyp7b1	3.70719	4.70537	573.514	9.66013e-127	3.84783e-125
236899	Pcyt1b	-7.29868	3.18392	573.264	1.09495e-126	4.35017e-125
70549	Tln2	-2.11729	7.28147	573.251	1.10199e-126	4.36689e-125
320910	Itgb8	-4.19455	4.34328	572.933	1.29203e-126	5.10682e-125
230125	Slc25a51	1.9449	8.04615	571.455	2.70907e-126	1.06804e-124
70599	Itprid2	-2.00748	6.94967	571.371	2.82494e-126	1.11088e-124
20249	Scd1	2.99374	8.23554	570.89	3.59582e-126	1.41042e-124
68588	Cthrc1	2.76701	6.19889	570.578	4.20237e-126	1.64415e-124
21745	Tep1	-2.50396	5.00118	570.403	4.58813e-126	1.79053e-124
68070	Pdzd2	-4.95041	4.67846	570.383	4.63379e-126	1.80378e-124
12450	Ccng1	2.25754	8.55594	569.806	6.18621e-126	2.40203e-124
171543	Bmf	-3.40452	4.25555	567.894	1.61187e-125	6.24296e-124
13636	Efna1	-3.92668	3.54745	567.626	1.84393e-125	7.12387e-124
105387	Akr1c14	-5.84743	3.13508	567.312	2.15837e-125	8.3178e-124
232313	Gxylt2	2.4258	7.23916	567.232	2.24587e-125	8.63344e-124
68337	Crip2	-2.23439	5.88797	566.759	2.84651e-125	1.09152e-123
18587	Pde6b	6.75437	3.6914	566.101	3.95751e-125	1.51377e-123
12552	Cdh11	2.39776	9.83486	566.082	3.99596e-125	1.5247e-123
20947	Swap70	-2.0945	6.35256	565.764	4.68599e-125	1.78357e-123
16889	Lipa	2.7003	8.75985	565.584	5.12779e-125	1.94692e-123
94185	Tnfrsf21	3.83253	4.80294	562.08	2.96599e-124	1.12336e-122
77940	A930004D18Rik	-4.31955	3.40603	561.256	4.48113e-124	1.69305e-122
13052	Cxadr	2.92567	5.82404	560.791	5.65707e-124	2.13212e-122
21833	Thra	-2.30878	6.07103	560.64	6.09945e-124	2.29325e-122
239017	Ogdhl	2.40748	5.3183	560.335	7.10839e-124	2.66608e-122
215210	Tmem120a	2.17733	6.13828	559.347	1.16599e-123	4.36254e-122
70152	Mettl7a1	-2.6774	5.1319	556.091	5.95759e-123	2.22364e-121
21950	Tnfsf9	4.81917	6.2445	553.319	2.3879e-122	8.89118e-121
97998	Deptor	-3.53626	4.51848	553.242	2.48198e-122	9.21922e-121
67573	Loxl4	-2.97802	5.41123	552.388	3.80549e-122	1.41014e-120
12389	Cav1	-2.58211	7.68502	551.885	4.89748e-122	1.81042e-120
18164	Nptx1	4.78353	3.97869	550.978	7.71346e-122	2.84457e-120
13039	Ctsl	2.01532	9.89765	550.88	8.10312e-122	2.98114e-120
15213	Hey1	6.6274	3.45623	550.378	1.04155e-121	3.82274e-120
213391	Rassf4	-5.63971	5.9797	550.035	1.23692e-121	4.529e-120
15234	Hgf	-3.42698	3.96204	550.007	1.25445e-121	4.5823e-120
14800	Gria2	8.76688	2.87047	549.251	1.83185e-121	6.67564e-120
18526	Pcdh10	6.68577	2.80207	547.933	3.5455e-121	1.28901e-119
56508	Rapgef4	4.74645	3.23429	545.804	1.03011e-120	3.73628e-119
18718	Pip4k2a	2.19923	5.69969	544.753	1.74381e-120	6.31006e-119
114663	Impa2	-3.83034	4.13235	543.029	4.13455e-120	1.4926e-118
12490	Cd34	-4.11837	4.13957	541.666	8.18291e-120	2.94719e-118
432572	Specc1	2.22987	6.01622	541.516	8.82377e-120	3.17059e-118
57915	Tbc1d1	1.90988	6.64917	540.824	1.24775e-119	4.47303e-118
12424	Cck	11.8034	2.65276	539.85	2.03225e-119	7.26848e-118
18159	Nppc	7.79215	3.09838	537.472	6.68808e-119	2.3865e-117
329941	Col8a2	-4.00267	5.7657	536.629	1.02062e-118	3.63344e-117
11479	Acvr1b	-1.90849	6.39863	535.756	1.58047e-118	5.61359e-117
12349	Car2	6.64761	4.99268	535.241	2.04551e-118	7.24863e-117
98845	Eps8l2	-3.38758	3.76909	534.212	3.42384e-118	1.21052e-116
64817	Svep1	-2.76825	9.86765	533.097	5.98734e-118	2.11201e-116
99382	Abtb2	-3.98152	4.53668	532.46	8.23725e-118	2.89902e-116
16922	Phyh	-2.26815	6.04507	531.164	1.57689e-117	5.53708e-116
11830	Aqp5	3.59115	5.01902	530.595	2.0961e-117	7.34349e-116
76566	Rflnb	-3.37317	6.20539	529.219	4.17737e-117	1.46018e-115
386463	Cdsn	3.30226	4.66727	528.899	4.90334e-117	1.71007e-115
235180	Fez1	2.43831	4.88124	526.289	1.81217e-116	6.30578e-115
70021	Nt5dc2	2.08397	6.09556	526.046	2.04756e-116	7.1088e-115
12286	Cacna1a	3.16327	5.94084	524.823	3.77721e-116	1.30844e-114
217082	Hlf	5.33907	3.59563	522.2	1.40559e-115	4.8581e-114
17304	Mfge8	2.14296	9.04227	522.042	1.52185e-115	5.24818e-114
319236	Trim12c	-2.61165	4.63631	521.623	1.87725e-115	6.45935e-114
217732	Cipc	2.25151	5.98432	520.582	3.162e-115	1.08557e-113
17250	Abcc1	1.98486	7.94918	519.098	6.64874e-115	2.27756e-113
13876	Erg	-4.98431	3.22274	518.776	7.8115e-115	2.66994e-113
72061	Aopep	-2.11554	6.48229	518.448	9.21043e-115	3.14112e-113
108116	Slco3a1	2.1241	6.30351	516.93	1.97027e-114	6.70457e-113
11489	Adam12	3.3166	8.16671	516.869	2.03136e-114	6.89722e-113
17161	Maoa	1.91618	7.23047	515.984	3.16505e-114	1.07229e-112
18569	Pdcd4	-2.99878	5.17923	514.756	5.8528e-114	1.97853e-112
83691	Crispld1	-4.93867	3.02089	514.45	6.82229e-114	2.30122e-112
232560	Caprin2	2.42927	5.54262	513.308	1.20931e-113	4.0702e-112
240479	Dipk1c	8.35478	2.71974	513.087	1.35054e-113	4.53563e-112
109246	Tspan9	1.86933	6.69259	512.831	1.53531e-113	5.14497e-112
230099	Car9	-6.3738	6.66808	511.994	2.33539e-113	7.80911e-112
74051	Steap2	1.99114	7.2128	510.773	4.30542e-113	1.43654e-111
94352	Loxl2	2.09912	8.52695	510.461	5.03382e-113	1.67595e-111
20520	Slc22a5	2.1475	6.02462	509.979	6.4089e-113	2.12916e-111
67458	Ergic1	2.01376	8.4465	509.212	9.41089e-113	3.11976e-111
18616	Peg3	2.30131	6.16789	509.009	1.04199e-112	3.44685e-111
16658	Mafb	2.82347	8.37679	508.419	1.40019e-112	4.62181e-111
66972	Slc25a23	3.08185	6.02592	508.394	1.41814e-112	4.67106e-111
15442	Hpse	2.84716	4.27657	508.023	1.70726e-112	5.61139e-111
66395	Ahnak	-2.10994	10.1267	507.699	2.00853e-112	6.58755e-111
20502	Slc16a2	-2.21448	6.19582	507.669	2.03833e-112	6.6711e-111
16601	Klf9	1.91335	6.6229	507.289	2.46583e-112	8.05312e-111
20657	Sod3	-3.43771	7.15488	506.908	2.98537e-112	9.72927e-111
216198	Tcp11l2	-3.39574	5.34748	502.77	2.3729e-111	7.71694e-110
252838	Tox	-5.12039	3.4708	502.062	3.38253e-111	1.09772e-109
93732	Acox2	-7.78044	2.71436	501.957	3.56503e-111	1.15452e-109
17454	Mov10	-2.92226	4.33396	501.86	3.74395e-111	1.20991e-109
15364	Hmga2	2.27205	6.374	500.898	6.06178e-111	1.95486e-109
67557	Larp6	2.86937	4.98321	499.576	1.17535e-110	3.78247e-109
56471	Stmn4	7.66499	2.79502	497.629	3.11728e-110	1.0011e-108
19228	Pth1r	-2.75609	5.26818	497.388	3.518e-110	1.12744e-108
76192	Abhd12	1.87259	6.88538	497.127	4.01015e-110	1.2825e-108
19241	Tmsb4x	2.21608	10.2983	496.257	6.19908e-110	1.97844e-108
18187	Nrp2	-1.76394	7.23182	489.833	1.54946e-108	4.93491e-107
24014	Rnasel	-2.86268	4.44826	489.132	2.20161e-108	6.99748e-107
66895	Pxdc1	-3.35885	5.07258	488.945	2.41775e-108	7.66866e-107
63953	Dusp10	3.09827	4.64531	487.842	4.20221e-108	1.33013e-106
20350	Sema3f	-2.58143	6.51941	486.851	6.90204e-108	2.18022e-106
100952	Emilin1	-3.30724	8.08846	486.152	9.79732e-108	3.08846e-106
108735	Sft2d2	-2.00263	6.18636	485.739	1.20511e-107	3.79117e-106
23876	Fbln5	-2.0536	9.5433	485.08	1.67671e-107	5.26405e-106
11630	Crybg1	-4.30827	3.8012	483.577	3.55903e-107	1.11509e-105
12577	Cdkn1c	-2.0297	6.84432	483.158	4.39211e-107	1.37331e-105
13608	Edar	-11.5304	2.39746	482.867	5.08044e-107	1.58532e-105
18003	Nedd9	-2.06283	6.35396	482.664	5.62344e-107	1.75122e-105
14718	Got1	2.06144	5.58539	482.297	6.75917e-107	2.10066e-105
19655	Rbmx	-2.04316	5.69738	481.419	1.04931e-106	3.25456e-105
30928	Zbtb18	1.93428	6.01301	481.096	1.23379e-106	3.81905e-105
14184	Fgfr3	-4.58562	3.04878	478.236	5.17093e-106	1.59739e-104
70433	Draxin	3.58612	4.99315	476.704	1.11389e-105	3.43413e-104
75785	Klhl24	-1.9897	6.43906	474.662	3.10008e-105	9.53847e-104
75320	Etnk1	1.81634	8.19148	473.706	5.00328e-105	1.53637e-103
235534	Pxylp1	2.50368	6.11217	472.902	7.48497e-105	2.29385e-103
231287	Atp10d	-3.0643	4.0433	471.269	1.6968e-104	5.18973e-103
269855	Ssc5d	-3.08676	4.10324	470.676	2.2838e-104	6.97124e-103
14605	Tsc22d3	-2.29076	4.89627	470.446	2.56222e-104	7.80567e-103
16997	Ltbp2	-2.79506	8.28848	470.228	2.85847e-104	8.691e-103
108154	Adamts6	-2.24419	5.11941	469.742	3.64704e-104	1.10668e-102
16010	Igfbp4	-3.20691	11.7676	469.448	4.22549e-104	1.27968e-102
75209	Sv2c	11.4778	2.37747	468.728	6.06163e-104	1.83216e-102
246316	Lgi2	4.49821	5.43148	468.515	6.74244e-104	2.03395e-102
216154	Med16	-2.22533	5.32277	467.502	1.1206e-103	3.37383e-102
320404	Itpkb	-2.71153	6.0479	467.104	1.36774e-103	4.10989e-102
15957	Ifit1	-4.37943	3.9833	465.932	2.46075e-103	7.37986e-102
17534	Mrc2	2.12143	9.0722	465.353	3.28827e-103	9.82997e-102
17105	Lyz2	-3.08913	3.86371	465.352	3.29047e-103	9.82997e-102
210029	Metrnl	2.28541	5.75651	465.256	3.45243e-103	1.02939e-101
11826	Aqp1	2.16924	7.20291	463.751	7.33723e-103	2.18346e-101
56045	Samhd1	-1.71651	6.7801	463.327	9.07573e-103	2.69561e-101
228770	Rspo4	7.96347	2.5461	463.283	9.27583e-103	2.74975e-101
474332	Dnm3os	-1.90673	6.75922	461.6	2.15624e-102	6.37974e-101
16206	Lrig1	2.15152	6.09773	459.44	6.36402e-102	1.87934e-100
54216	Pcdh7	2.38202	5.68342	458.529	1.00454e-101	2.9608e-100
11803	Aplp1	2.60204	6.66888	456.552	2.70603e-101	7.96057e-100
20130	Rras	-1.96736	5.81176	456.136	3.33255e-101	9.785e-100
13830	Stom	1.90321	7.13969	455.749	4.04638e-101	1.18584e-99
22151	Tubb2a	-1.88678	7.57635	455.722	4.10119e-101	1.19962e-99
20442	St3gal1	1.70251	7.56137	455.063	5.70535e-101	1.66568e-99
50720	Sacs	2.15162	6.10483	453.876	1.03398e-100	3.013e-99
320452	P4ha3	-2.98104	5.30018	453.128	1.50452e-100	4.37587e-99
64406	Sp5	11.42	2.32334	450.69	5.10348e-100	1.48155e-98
320916	Wscd2	-8.13423	2.42797	449.52	9.17461e-100	2.65839e-98
209630	Frmd4a	1.88139	5.96385	449.506	9.23685e-100	2.67141e-98
14319	Fth1	-2.27884	11.7046	447.788	2.1857e-99	6.30948e-98
94109	Csmd1	-6.07846	3.48012	447.301	2.78969e-99	8.03797e-98
20660	Sorl1	-4.61542	3.35581	447.176	2.96967e-99	8.54057e-98
24001	Tiam2	-2.22685	4.86953	446.971	3.29081e-99	9.44652e-98
18810	Plec	-2.0973	8.26262	446.885	3.43611e-99	9.84529e-98
12816	Col12a1	2.05022	10.7369	446.622	3.92017e-99	1.12114e-97
68655	Fndc1	2.67838	7.83644	446.573	4.01649e-99	1.14656e-97
19414	Rasa3	-2.01303	7.08532	446.455	4.26301e-99	1.21468e-97
20311	Cxcl5	-2.87536	6.68941	446.281	4.64955e-99	1.32238e-97
13345	Twist2	4.31612	4.76824	445.244	7.81916e-99	2.21975e-97
238276	Akap5	4.14777	3.82858	443.279	2.09369e-98	5.93277e-97
218544	Sgtb	2.29149	4.91458	442.936	2.48638e-98	7.03257e-97
18791	Plat	2.18801	6.69203	442.179	3.633e-98	1.02569e-96
14370	Fzd8	-2.39828	6.57248	441.214	5.89157e-98	1.6603e-96
319387	Adgrl3	-3.88319	3.39128	440.049	1.05627e-97	2.97125e-96
14219	Ccn2	-1.91209	8.69255	439.639	1.2975e-97	3.64318e-96
70025	Acot7	1.9723	6.51195	438.418	2.39146e-97	6.70261e-96
223649	Nrbp2	-3.81208	5.08973	438.004	2.94338e-97	8.23452e-96
227753	Gsn	-1.8978	9.6486	437.655	3.50666e-97	9.79259e-96
433375	Creg1	2.02062	6.63462	437.647	3.52022e-97	9.8127e-96
15511	Hspa1b	-2.03779	5.17629	436.217	7.20732e-97	2.00543e-95
241327	Olfml2a	-5.33458	3.34894	436.205	7.25205e-97	2.01424e-95
100038882	Isg15	-4.03333	3.43247	435.391	1.09046e-96	3.02329e-95
17263	Meg3	-2.53506	7.00663	434.608	1.61458e-96	4.46835e-95
11535	Adm	2.0844	8.60991	433.972	2.21985e-96	6.13244e-95
217944	Rapgef5	6.68173	2.86024	433.832	2.38102e-96	6.56592e-95
22272	Uqcrq	1.82136	6.47653	433.11	3.41978e-96	9.41357e-95
50706	Postn	-3.04392	10.6337	432.586	4.44655e-96	1.22181e-94
12064	Bdnf	2.50394	4.1879	432.106	5.6549e-96	1.55107e-94
18196	Nsg1	1.72187	7.29833	431.676	7.01495e-96	1.9207e-94
57435	Plin4	-5.50739	4.06226	431.441	7.89409e-96	2.15758e-94
277854	Depdc5	2.61244	6.66938	430.776	1.10147e-95	3.00516e-94
20512	Slc1a3	-3.17938	4.53454	430.739	1.12204e-95	3.05586e-94
80287	Apobec3	-2.63325	4.39339	430.281	1.41161e-95	3.83774e-94
268759	9930012K11Rik	-2.57755	4.1655	429.419	2.17482e-95	5.90226e-94
75475	Oplah	-2.34001	5.40566	429.196	2.43208e-95	6.58883e-94
57319	Smpdl3a	-2.43434	5.0394	429.011	2.66829e-95	7.21607e-94
105242407	Gm38684	-3.55496	3.67678	428.983	2.70493e-95	7.30237e-94
245050	Gask1a	-5.05221	3.91392	428.438	3.55562e-95	9.58215e-94
110095	Pygl	-2.48538	5.70231	428.177	4.0529e-95	1.09032e-93
20710	Serpinb9e	8.42882	2.4948	427.836	4.80659e-95	1.29083e-93
216795	Wnt9a	4.15164	4.64821	427.643	5.29484e-95	1.41948e-93
208748	Prrg3	-5.44784	2.92106	426.828	7.96804e-95	2.13242e-93
73847	Fam110a	2.86263	5.24099	424.998	1.99365e-94	5.32619e-93
18605	Enpp1	-2.50318	5.28846	424.328	2.78833e-94	7.43634e-93
16195	Il6st	-1.97683	10.0674	423.438	4.35739e-94	1.16009e-92
20112	Rps6ka2	2.45033	5.49077	423.066	5.24807e-94	1.39481e-92
80982	Cemip	2.26072	10.1793	422.903	5.69708e-94	1.51154e-92
17069	Ly6e	1.89754	8.75345	422.88	5.76092e-94	1.52585e-92
18559	Pctp	2.90338	4.13482	422.69	6.33786e-94	1.67578e-92
77128	Crebrf	-2.14446	5.63349	422.489	7.00968e-94	1.85024e-92
19200	Pstpip1	3.86203	3.64558	422.401	7.32732e-94	1.93078e-92
66540	Fam107b	1.95864	6.85566	422.204	8.0853e-94	2.12688e-92
22068	Trpc6	11.3243	2.20938	421.696	1.04285e-93	2.73858e-92
20306	Ccl7	3.2732	5.91423	421.492	1.15522e-93	3.02853e-92
20450	St8sia2	2.20716	5.93753	419.882	2.5886e-93	6.77475e-92
13731	Emp2	-1.67371	6.72297	419.524	3.09717e-93	8.092e-92
15551	Htr1b	4.1481	3.24655	419.218	3.61056e-93	9.4174e-92
11819	Nr2f2	1.8185	6.57077	419.057	3.91564e-93	1.01959e-91
26568	Slc27a3	-4.07415	4.30399	418.605	4.91031e-93	1.27643e-91
12579	Cdkn2b	2.43734	5.69177	418.523	5.11694e-93	1.32791e-91
382571	Kcnf1	4.83236	2.76474	417.55	8.32985e-93	2.15806e-91
20568	Slpi	-5.05908	7.26295	417.175	1.00532e-92	2.60016e-91
71685	Galnt14	6.35949	2.5668	416.178	1.65711e-92	4.2788e-91
24136	Zeb2	1.8721	7.21297	415.938	1.86863e-92	4.81688e-91
242939	Cpz	7.12888	4.71085	415.723	2.08119e-92	5.35584e-91
100532	Rell1	1.927	5.17404	415.008	2.97925e-92	7.6542e-91
17755	Map1b	1.87009	7.17748	413.129	7.63816e-92	1.95911e-90
235130	Adamts15	2.52572	7.33517	413.059	7.91045e-92	2.02557e-90
16494	Kcna6	-9.12722	2.30773	411.926	1.39634e-91	3.56959e-90
54353	Skap2	-1.87061	5.7381	411.399	1.81792e-91	4.6396e-90
66274	Lyrm9	3.24301	3.49756	411.367	1.8478e-91	4.70807e-90
103466	Nt5dc3	1.81189	6.19864	411.128	2.08247e-91	5.29723e-90
56742	Psrc1	2.48926	5.54073	411.042	2.17475e-91	5.52286e-90
56336	B4galt5	2.26629	6.47078	410.656	2.63854e-91	6.68966e-90
76884	Cyfip2	5.65533	4.07762	410.003	3.66073e-91	9.25163e-90
74013	Rftn2	-2.15807	4.75212	410.002	3.66104e-91	9.25163e-90
14367	Fzd5	-2.16498	5.80517	409.079	5.81521e-91	1.46713e-89
68659	Gask1b	2.27008	8.20293	409.058	5.87625e-91	1.4801e-89
319909	Ism1	-1.78122	7.23815	408.979	6.1148e-91	1.53768e-89
52666	Arhgef25	-1.78562	6.87629	407.806	1.10075e-90	2.76354e-89
14871	Gstt1	-2.95066	3.54113	407.505	1.28009e-90	3.20854e-89
11548	Adra1b	6.27316	4.8793	407.499	1.28369e-90	3.21234e-89
11600	Angpt1	-2.82451	5.84978	406.05	2.65479e-90	6.63268e-89
14560	Gdf10	6.04973	4.24677	405.886	2.8821e-90	7.18892e-89
22041	Trf	-2.93896	4.69277	405.376	3.72147e-90	9.2676e-89
53328	Pgrmc1	1.60087	8.14343	404.953	4.59892e-90	1.14343e-88
108767	Pnrc1	-1.74999	6.69098	404.388	6.10567e-90	1.5156e-88
16974	Lrp6	-1.61035	8.21242	404.279	6.44876e-90	1.59819e-88
20317	Serpinf1	1.88365	9.78277	403.732	8.48271e-90	2.09889e-88
97165	Hmgb2	-2.31371	4.95348	403.577	9.16652e-90	2.26445e-88
117600	Srgap1	2.03803	5.24	403.13	1.14704e-89	2.82905e-88
240726	Slco5a1	5.68196	3.23241	402.006	2.01452e-89	4.96067e-88
71911	Bdh1	2.75801	4.42358	402.003	2.01841e-89	4.96233e-88
231507	Plac8	3.11323	3.83082	401.546	2.53778e-89	6.22927e-88
18073	Nid1	1.61819	10.4435	400.405	4.49433e-89	1.10143e-87
56496	Tspan6	-2.37662	7.46451	399.799	6.0917e-89	1.49053e-87
12496	Entpd2	-6.17497	2.60451	399.74	6.27339e-89	1.53256e-87
98878	Ehd4	1.949	6.05643	398.195	1.36096e-88	3.31949e-87
55925	Syt8	-5.27696	3.64477	397.766	1.68716e-88	4.10862e-87
236285	Lancl3	3.68019	3.83713	396.605	3.01938e-88	7.34128e-87
76954	Denn2b	-1.82507	6.36597	396.391	3.36139e-88	8.15998e-87
109620	Dsp	8.58922	2.29549	395.884	4.33532e-88	1.05077e-86
380711	Rap1gap2	3.10288	4.71561	395.07	6.51987e-88	1.57777e-86
14799	Gria1	7.6383	7.75574	394.608	8.21757e-88	1.98548e-86
79202	Tnfrsf22	2.03178	5.03041	392.263	2.66224e-87	6.42229e-86
20392	Sgce	-2.23867	5.93901	391.934	3.13994e-87	7.56285e-86
192166	Sardh	-2.181	5.03141	391.463	3.97623e-87	9.56218e-86
269608	Plekhg5	-2.23574	5.53279	391.201	4.53272e-87	1.08835e-85
230163	Aldob	6.06077	2.33871	391.066	4.85149e-87	1.16307e-85
70536	Qpct	3.17655	4.22517	390.617	6.07659e-87	1.45451e-85
67888	Tmem100	7.60843	4.37742	390.082	7.94355e-87	1.89845e-85
12364	Casp12	-2.3215	5.95987	389.728	9.48785e-87	2.26401e-85
114128	Laptm4b	1.93575	6.47938	389.472	1.07862e-86	2.56986e-85
244654	Mtss2	-2.03489	6.64721	389.298	1.17662e-86	2.799e-85
50934	Slc7a8	3.75736	4.97377	388.69	1.59642e-86	3.79181e-85
21366	Slc6a6	-1.90767	7.99348	388.675	1.60831e-86	3.81418e-85
76612	Lrrc27	3.12028	3.94669	387.986	2.27139e-86	5.37841e-85
59091	Jph2	3.26906	5.8304	387.76	2.54446e-86	6.01578e-85
211548	Nomo1	1.6033	7.99517	387.475	2.93496e-86	6.9284e-85
213393	Depp1	-11.1824	2.05217	387.353	3.11915e-86	7.35193e-85
17313	Mgp	-7.02739	8.15841	387.177	3.40772e-86	8.01986e-85
97440	B3gnt9	-2.6029	4.38946	386.864	3.98668e-86	9.3681e-85
16551	Kif11	-2.4359	4.14495	386.609	4.5293e-86	1.0627e-84
235086	Igsf9b	4.5658	2.73574	385.671	7.2505e-86	1.69858e-84
100039781	Hrct1	-5.02592	3.05526	385.609	7.47677e-86	1.74893e-84
70223	Nars	1.61391	7.89444	384.177	1.53327e-85	3.5811e-84
11595	Acan	-5.1506	5.89443	383.67	1.97647e-85	4.60928e-84
105242657	Hoxaas2	-3.10028	3.66197	383.519	2.13268e-85	4.96605e-84
55932	Gbp3	-4.61183	3.09458	383.422	2.238e-85	5.20342e-84
239405	Rspo2	-5.81452	2.86502	383.248	2.44301e-85	5.67155e-84
22352	Vim	-1.81593	11.1755	382.117	4.30555e-85	9.98046e-84
74137	Nuak2	-2.38022	4.78919	381.351	6.32097e-85	1.46303e-83
52430	Echdc2	-2.0245	4.81309	381.137	7.03611e-85	1.62611e-83
67468	Mmd	1.98821	6.70804	380.901	7.92012e-85	1.82767e-83
330286	D630045J12Rik	-2.18209	4.64382	380.439	9.98632e-85	2.30103e-83
19049	Ppp1r1b	-11.2491	2.07856	380.202	1.12447e-84	2.58712e-83
20539	Slc7a5	1.83301	6.02406	379.639	1.49136e-84	3.42613e-83
237988	Cdr2l	1.76488	5.80408	379.248	1.81445e-84	4.16217e-83
208076	Pknox2	-3.03621	3.59878	377.82	3.71271e-84	8.50392e-83
16401	Itga4	2.61074	4.495	377.686	3.96985e-84	9.0794e-83
12350	Car3	6.35066	6.24812	377.373	4.64385e-84	1.06052e-82
29811	Ndrg2	-2.12274	5.1305	377.319	4.77085e-84	1.08791e-82
69068	Tcim	3.1894	4.23938	376.686	6.55248e-84	1.49197e-82
18162	Npr3	-2.2907	5.89714	376.11	8.74856e-84	1.98775e-82
14132	Fcgrt	-1.81097	6.7135	376.108	8.75563e-84	1.98775e-82
12751	Tpp1	1.51058	8.10904	375.461	1.21127e-83	2.74583e-82
23967	Osr1	2.71597	7.3323	375.427	1.232e-83	2.78872e-82
320078	Olfml2b	1.7643	6.87708	375.405	1.24567e-83	2.81555e-82
331532	Tceal5	8.94506	2.1812	374.735	1.74285e-83	3.93352e-82
22402	Ccn4	1.97235	6.35302	374.465	1.99505e-83	4.49615e-82
15902	Id2	2.13451	7.21272	372.659	4.93427e-83	1.11039e-81
17122	Mxd4	-1.80051	7.3831	372.145	6.38559e-83	1.4349e-81
68048	Aen	2.29573	6.33122	371.548	8.61473e-83	1.93299e-81
434215	Lrrc32	2.86401	8.87297	370.326	1.58907e-82	3.56039e-81
22253	Unc5c	-2.57902	5.59962	370.311	1.60171e-82	3.58351e-81
214305	Hhipl1	2.90473	4.6082	369.694	2.18141e-82	4.8734e-81
13612	Edil3	2.00509	5.76809	369.604	2.28234e-82	5.09149e-81
73173	Pcdh18	-2.16369	5.65977	369.349	2.59444e-82	5.77939e-81
24066	Spry4	2.81703	3.56405	369.218	2.77e-82	6.16156e-81
94280	Sfxn3	-1.5939	6.55407	369.124	2.90367e-82	6.44957e-81
237353	Sh3rf3	-2.99608	3.72581	369.106	2.93033e-82	6.49943e-81
11982	Atp10a	-2.12897	5.12502	368.531	3.90855e-82	8.65666e-81
20597	Smpd1	1.60029	7.51496	368.286	4.41899e-82	9.77313e-81
18828	Plscr2	-2.99382	5.11112	368.134	4.76848e-82	1.0531e-80
320398	Lrig3	-1.76319	6.20346	368.11	4.8268e-82	1.06445e-80
76650	Srxn1	1.93733	6.37481	366.612	1.02306e-81	2.25293e-80
16425	Itih2	2.37016	5.9769	366.25	1.22687e-81	2.6979e-80
54381	Cpq	-1.66117	6.24444	366.039	1.36365e-81	2.99439e-80
57266	Cxcl14	2.54245	6.6601	365.792	1.54317e-81	3.38379e-80
14368	Fzd6	2.5506	4.38494	365.783	1.55023e-81	3.39444e-80
107995	Cdc20	-2.59793	4.0044	365.16	2.11825e-81	4.6316e-80
195209	Zfp469	2.81455	4.47068	364.872	2.44715e-81	5.34318e-80
14283	Fosl1	2.24419	4.56315	364.647	2.74034e-81	5.97487e-80
70358	Steap1	2.91184	4.07491	363.781	4.23003e-81	9.20987e-80
231214	Cc2d2a	-2.19826	4.47533	363.684	4.43925e-81	9.6503e-80
14457	Gas7	-2.06997	4.78446	363.682	4.44484e-81	9.6503e-80
16421	Itgb7	4.10127	3.26149	363.675	4.45962e-81	9.66879e-80
23886	Gdf15	6.83582	3.97751	363.126	5.87347e-81	1.27162e-79
381058	Unc93a	11.1075	1.98155	363.107	5.93118e-81	1.28232e-79
11784	Apba2	8.85894	2.07605	362.737	7.13944e-81	1.54138e-79
16973	Lrp5	-1.99495	6.48177	362.564	7.78367e-81	1.67812e-79
18049	Ngf	3.12351	3.4734	361.393	1.40017e-80	3.01447e-79
215707	Ccdc92	2.53733	3.89039	361.244	1.50918e-80	3.24463e-79
57257	Vav3	3.86514	4.32228	360.868	1.82256e-80	3.91291e-79
243771	Parp12	-2.13164	4.82762	360.072	2.71522e-80	5.82129e-79
75906	Fam184a	5.76331	2.81038	359.845	3.04285e-80	6.51465e-79
16391	Irf9	-2.33005	5.20018	359.831	3.06407e-80	6.55098e-79
83924	Gpr137b	2.11646	5.37147	357.403	1.03556e-79	2.21097e-78
208177	Phldb2	1.48179	8.84194	356.748	1.43791e-79	3.06574e-78
107375	Slc25a45	-2.64633	3.6905	355.214	3.10229e-79	6.60523e-78
217517	Stxbp6	-3.95141	3.3187	355.04	3.38567e-79	7.19862e-78
14628	Ostm1	1.55505	6.24523	354.88	3.66781e-79	7.78779e-78
54608	Abhd2	1.66597	7.12481	354.069	5.50981e-79	1.16828e-77
230837	Asap3	-2.32923	4.38324	353.877	6.06436e-79	1.28409e-77
327766	Tmem26	2.5424	4.86219	353.585	7.0204e-79	1.48449e-77
268970	Arhgap28	-2.59259	4.60619	353.15	8.73465e-79	1.84445e-77
210530	P3h2	-3.40106	3.07103	352.751	1.067e-78	2.25005e-77
21385	Tbx2	5.27952	5.49841	352.22	1.39256e-78	2.93255e-77
89867	Sec16b	-2.60099	4.25727	351.783	1.73353e-78	3.64561e-77
210992	Lpcat1	1.55069	6.24445	348.414	9.38771e-78	1.97155e-76
381983	Lmtk3	4.39238	4.32772	347.746	1.31222e-77	2.7521e-76
19221	Ptgfrn	-1.59671	6.44908	347.68	1.3564e-77	2.83839e-76
54720	Rcan1	1.83666	5.41414	347.677	1.35817e-77	2.83839e-76
20364	Selenow	1.55481	8.09626	347.676	1.35889e-77	2.83839e-76
15040	H2-T23	-1.86787	5.1027	347.032	1.87686e-77	3.91499e-76
27280	Phlda3	1.72624	7.36604	346.735	2.17856e-77	4.53818e-76
77113	Klhl2	1.98529	5.1053	346.453	2.50935e-77	5.2202e-76
231633	Tmem119	2.3232	5.96855	346.272	2.7477e-77	5.70833e-76
97487	Cmtm4	1.62593	6.76114	344.645	6.21394e-77	1.2892e-75
26757	Dpysl4	-3.37016	3.62627	344.364	7.15158e-77	1.48174e-75
67606	Fibin	-2.15103	6.06064	342.937	1.46308e-76	3.0273e-75
22715	Zfp57	-2.28998	4.13477	342.183	2.13486e-76	4.41138e-75
11484	Aspa	8.04403	4.37553	341.884	2.48018e-76	5.11808e-75
216188	Aldh1l2	2.0592	4.55283	341.425	3.12279e-76	6.43553e-75
224697	Adamts10	-2.24501	4.8496	341.167	3.55467e-76	7.31579e-75
14314	Fstl1	-1.49456	10.8011	340.996	3.87188e-76	7.958e-75
24052	Sgcd	-3.22386	3.13189	340.247	5.6364e-76	1.15693e-74
17470	Cd200	-5.25222	2.32572	339.38	8.70896e-76	1.78522e-74
116701	Fgfrl1	-2.12527	7.7211	339.142	9.81177e-76	2.00861e-74
21973	Top2a	-2.06382	6.25374	339.114	9.9512e-76	2.03445e-74
14373	G0s2	-2.45989	4.70785	338.606	1.28348e-75	2.62051e-74
17356	Afdn	1.53276	7.25505	338.37	1.44491e-75	2.9462e-74
12642	Ch25h	3.50446	3.25571	338.185	1.58519e-75	3.22797e-74
13709	Elf1	-1.62456	5.94622	338.058	1.68945e-75	3.43574e-74
101706	Numa1	-1.74432	7.4055	337.245	2.54069e-75	5.16004e-74
17219	Mcm6	-1.82392	5.41139	336.894	3.0294e-75	6.1445e-74
104080	Nxph4	-5.41501	4.01527	336.715	3.31376e-75	6.71244e-74
12837	Col8a1	-1.58638	10.0983	336.662	3.402e-75	6.88212e-74
110695	Aldh7a1	1.49062	8.11476	336.57	3.56361e-75	7.19961e-74
26941	Slc9a3r1	1.8647	5.21555	336.437	3.80831e-75	7.68391e-74
74682	Wdr35	1.92575	6.81578	336.257	4.16891e-75	8.40048e-74
13992	Khdrbs3	2.21515	4.98688	336.224	4.23909e-75	8.53076e-74
108682	Gpt2	2.04753	5.10662	335.973	4.80761e-75	9.66223e-74
66902	Mtap	1.86182	7.61519	335.775	5.3095e-75	1.0657e-73
17132	Maf	-2.40709	5.81747	335.281	6.8005e-75	1.36319e-73
20465	Sim2	3.17673	4.39182	335.129	7.34051e-75	1.46953e-73
76867	Rhbdd1	1.75143	5.93206	334.892	8.2684e-75	1.65314e-73
66356	Knop1	1.5442	6.31757	334.72	9.01072e-75	1.79923e-73
14402	Gabrb3	7.10836	2.08679	333.085	2.04547e-74	4.07903e-73
20666	Sox11	3.02096	3.72591	332.86	2.28971e-74	4.56018e-73
232430	Crebl2	-2.05653	4.49312	332.409	2.87182e-74	5.71215e-73
14561	Gdf11	1.65744	5.54245	332.129	3.30449e-74	6.56427e-73
227325	Dner	6.95293	2.8218	332.092	3.36575e-74	6.67736e-73
98932	Myl9	1.54036	8.39979	331.954	3.60702e-74	7.14681e-73
18128	Notch1	-2.19696	4.95246	331.596	4.31599e-74	8.53941e-73
66569	Gdpd1	2.56806	4.15122	331.594	4.32095e-74	8.53941e-73
11676	Aldoc	-4.44876	3.92892	331.339	4.90984e-74	9.69081e-73
13865	Nr2f1	1.93175	5.74026	331.221	5.20923e-74	1.02686e-72
12395	Runx1t1	-1.88848	4.8981	330.992	5.84335e-74	1.15039e-72
54366	Ctnnal1	-2.32958	4.77772	330.868	6.21793e-74	1.22257e-72
18628	Per3	-2.47664	4.95203	329.445	1.26967e-73	2.49325e-72
17380	Mme	-2.30473	9.60233	329.439	1.27342e-73	2.49743e-72
320046	F730043M19Rik	1.91132	6.02087	329.361	1.32441e-73	2.59414e-72
11758	Prdx6	1.842	8.18458	329.241	1.40669e-73	2.75178e-72
547253	Parp14	-2.83406	3.40191	329.107	1.50435e-73	2.9391e-72
54667	Atp8b2	-1.46235	7.15386	328.751	1.79782e-73	3.50803e-72
110454	Ly6a	1.8878	7.68545	328.491	2.04825e-73	3.99163e-72
20678	Sox5	-3.3112	4.30222	327.905	2.74857e-73	5.34965e-72
13730	Emp1	-1.87526	7.98443	327.734	2.99396e-73	5.81991e-72
73710	Tubb2b	-1.7403	6.27063	327.623	3.16576e-73	6.14612e-72
56532	Ripk3	1.60484	5.78287	327.574	3.24528e-73	6.29259e-72
21983	Tpbg	1.81411	6.927	326.946	4.44657e-73	8.61105e-72
16538	Kcns1	-10.9045	1.78997	326.218	6.40543e-73	1.23889e-71
12419	Cbx5	-1.55563	6.48408	326.176	6.54221e-73	1.26376e-71
13591	Ebf1	-1.46244	6.657	326.116	6.74023e-73	1.30038e-71
13800	Enah	1.44365	8.21512	325.268	1.03119e-72	1.98698e-71
52468	Ctdsp2	-1.70296	8.09183	324.956	1.20598e-72	2.32087e-71
16180	Il1rap	-1.91436	6.29929	324.311	1.6668e-72	3.20371e-71
54352	Irx5	2.18647	6.46416	324.117	1.8374e-72	3.52721e-71
20358	Sema6a	3.19708	3.28163	323.672	2.29707e-72	4.40414e-71
245527	Eda2r	2.71141	4.95633	323.576	2.40963e-72	4.61421e-71
93689	Lmod1	3.0444	6.00512	323.533	2.46204e-72	4.70873e-71
27410	Abca3	1.75428	5.81436	323.111	3.04313e-72	5.81287e-71
73182	Pear1	-2.0242	5.86643	322.78	3.59163e-72	6.8521e-71
268739	Arhgef40	-1.525	6.74831	322.526	4.08042e-72	7.77499e-71
71566	Clmp	1.57406	8.26433	322.486	4.16333e-72	7.92318e-71
223272	Itgbl1	-2.26342	5.30734	321.668	6.27298e-72	1.19233e-70
26570	Slc7a11	6.12221	2.66977	321.427	7.079e-72	1.34388e-70
241525	Ypel4	-3.6521	3.19365	321.27	7.66023e-72	1.45243e-70
13555	E2f1	1.92693	5.3575	321.167	8.06805e-72	1.52787e-70
234797	6430548M08Rik	1.93951	4.49016	320.748	9.95308e-72	1.88254e-70
170736	Parvb	2.91267	3.49422	320.648	1.0464e-71	1.97675e-70
21401	Tcea3	-3.76605	2.90914	320.509	1.12185e-71	2.11668e-70
17714	Grpel2	1.76799	5.47156	320.397	1.18671e-71	2.23632e-70
14942	Gzme	3.88966	3.4324	319.447	1.91117e-71	3.59716e-70
66175	Mustn1	2.55223	4.1733	318.884	2.53567e-71	4.76676e-70
27981	Rsrp1	-1.40771	8.59804	318.261	3.46477e-71	6.50542e-70
11666	Abcd1	-1.82143	4.79979	318.01	3.93035e-71	7.37061e-70
19266	Ptprd	2.06895	5.63359	316.911	6.81918e-71	1.27725e-69
69354	Slc38a4	2.74445	4.50637	316.253	9.48637e-71	1.77466e-69
22145	Tuba4a	1.77831	4.9996	316.223	9.62792e-71	1.79896e-69
67865	Rgs10	2.93743	3.98937	316.099	1.02469e-70	1.91229e-69
20397	Sgpl1	1.37921	7.88857	315.897	1.13435e-70	2.11439e-69
57913	Pidd1	2.52109	3.56248	315.648	1.28516e-70	2.39171e-69
21664	Phlda1	1.95869	5.53664	315.646	1.28623e-70	2.39171e-69
78244	Dnajc21	1.70422	5.50158	314.981	1.79586e-70	3.33533e-69
23984	Pde10a	2.20172	4.7094	314.875	1.89333e-70	3.51212e-69
17390	Mmp2	1.41404	10.4176	314.806	1.96016e-70	3.63172e-69
14388	Gab1	-1.65094	5.42181	314.423	2.37586e-70	4.39663e-69
224008	Spidr	-1.66917	5.75928	314.298	2.52849e-70	4.67346e-69
66152	Uqcr10	1.78571	6.21155	313.754	3.32254e-70	6.13377e-69
20312	Cx3cl1	-2.44375	5.02921	313.613	3.56515e-70	6.57377e-69
22329	Vcam1	1.56837	7.83684	312.294	6.91087e-70	1.27277e-68
66412	Arrdc4	1.94404	6.66701	312.185	7.29771e-70	1.34241e-68
12380	Cast	-1.64654	6.56089	311.463	1.04816e-69	1.9258e-68
21886	Tle2	-2.49619	6.176	311.335	1.1177e-69	2.05112e-68
242316	Gdf6	4.41396	4.85257	310.798	1.46371e-69	2.68289e-68
100434	Slc44a1	-1.64133	6.77537	310.789	1.47e-69	2.69122e-68
21415	Tcf7l1	-2.22752	5.04235	310.701	1.53619e-69	2.80906e-68
23792	Adam23	2.80175	6.98287	310.637	1.58675e-69	2.89808e-68
80876	Ifitm2	-1.97602	7.65407	310.081	2.09638e-69	3.82435e-68
71361	Aifm2	1.75246	4.90999	310.061	2.11752e-69	3.85835e-68
19012	Plpp1	-1.63249	7.62554	309.117	3.40118e-69	6.19e-68
12709	Ckb	1.99097	7.52985	309.003	3.60111e-69	6.54612e-68
241447	Cers6	1.5159	6.00533	308.754	4.08078e-69	7.40932e-68
11544	Adprh	1.77815	7.16875	308.646	4.30614e-69	7.80932e-68
12841	Col9a3	-5.11783	5.45863	308.59	4.42912e-69	8.0229e-68
170706	Tmem37	4.08105	3.21946	308.385	4.90911e-69	8.88192e-68
67448	Plxdc2	-2.15083	6.036	308.145	5.53845e-69	1.00088e-67
217410	Trib2	-1.98037	6.29541	308.103	5.6559e-69	1.02091e-67
20513	Slc1a6	1.98934	4.33642	307.955	6.09294e-69	1.09851e-67
20649	Sntb1	2.21387	4.01107	307.901	6.25741e-69	1.12684e-67
328035	Fads6	5.56731	2.45983	307.345	8.27139e-69	1.48779e-67
623230	Tmem200b	3.45484	4.36438	307.044	9.62213e-69	1.72873e-67
69202	Ptms	-2.43303	7.89889	306.939	1.01411e-68	1.81984e-67
12443	Ccnd1	1.76007	7.78514	305.572	2.01345e-68	3.60899e-67
21929	Tnfaip3	2.33276	4.90288	305.421	2.17105e-68	3.88696e-67
66915	Cops9	1.63792	5.96861	304.458	3.52077e-68	6.29613e-67
80898	Erap1	-1.99347	4.75178	304.334	3.74685e-68	6.69266e-67
108100	Baiap2	-1.83509	4.96865	304.203	4.00061e-68	7.13766e-67
230737	Gnl2	1.51894	6.7437	303.76	4.99557e-68	8.90252e-67
76499	Clasp2	-1.53824	6.32091	303.719	5.09923e-68	9.07675e-67
278279	Tmtc2	3.00639	4.0123	303.635	5.32018e-68	9.45912e-67
13732	Emp3	-1.64631	5.9589	303.558	5.5286e-68	9.81836e-67
353310	Zfp703	-2.89365	7.78377	303.469	5.78182e-68	1.02563e-66
74277	Chic2	1.45227	6.33572	303.074	7.04856e-68	1.24889e-66
18033	Nfkb1	-1.68251	6.72959	301.106	1.89125e-67	3.34714e-66
16324	Inhbb	2.83986	9.11099	300.938	2.05811e-67	3.63828e-66
14366	Fzd4	-2.05187	4.80903	300.432	2.6527e-67	4.68401e-66
226971	Plekhb2	1.55498	5.66176	300.359	2.75203e-67	4.85384e-66
68038	Chid1	1.62394	6.77088	299.477	4.28283e-67	7.54511e-66
98733	Obsl1	-2.10742	6.09955	298.362	7.4936e-67	1.31865e-65
56219	Extl1	-3.44983	2.76257	298.122	8.44949e-67	1.48516e-65
223697	Sun2	-1.54042	6.40334	297.939	9.26495e-67	1.62664e-65
14465	Gata6	3.25932	3.24979	297.935	9.28048e-67	1.62751e-65
207474	Kctd12b	-3.45215	3.65862	297.778	1.0042e-66	1.75906e-65
69710	Arap1	-1.68766	6.1426	297.4	1.21409e-66	2.12431e-65
214685	Chadl	-5.07994	2.2276	296.993	1.48904e-66	2.60244e-65
29856	Smtn	-1.90911	6.11823	296.155	2.26757e-66	3.95862e-65
14719	Got2	1.44424	7.74089	295.829	2.66988e-66	4.65567e-65
71323	Rassf8	1.43864	6.11587	295.814	2.68973e-66	4.68499e-65
219132	Phf11d	-4.37302	2.80386	295.651	2.92006e-66	5.08044e-65
67775	Rtp4	-4.57769	3.45725	295.567	3.04453e-66	5.29103e-65
216233	Socs2	-1.942	5.75538	295.401	3.30996e-66	5.74585e-65
17246	Mdm2	1.7053	7.13403	295.118	3.81528e-66	6.61558e-65
319565	Syne2	-1.59338	5.57585	294.897	4.26185e-66	7.38163e-65
22360	Nrsn1	10.7895	1.66215	294.392	5.48967e-66	9.49757e-65
74229	Paqr8	2.2189	4.60159	294.051	6.51564e-66	1.12599e-64
20166	Rtkn	-2.76421	3.71558	293.514	8.52816e-66	1.47213e-64
215798	Adgrg6	-3.01553	5.46951	293.213	9.92057e-66	1.71058e-64
56615	Mgst1	1.55761	7.26413	293.145	1.02613e-65	1.76735e-64
19089	Prkcsh	1.53684	7.84386	293.141	1.02824e-65	1.769e-64
27404	Abca8b	4.06259	3.38564	292.714	1.27416e-65	2.18965e-64
56791	Ube2l6	-2.88394	3.27117	291.892	1.92467e-65	3.30388e-64
21817	Tgm2	2.54621	8.09176	291.546	2.28922e-65	3.92528e-64
20319	Sfrp2	-2.21111	6.27933	291.433	2.42318e-65	4.15037e-64
16905	Lmna	-1.41454	7.90511	291.42	2.439e-65	4.17028e-64
227731	Slc25a25	2.02314	4.7039	291.419	2.44022e-65	4.17028e-64
223864	Rapgef3	-2.5266	3.42702	291.314	2.57176e-65	4.39022e-64
18583	Pde7a	-1.6947	5.86823	291.167	2.76927e-65	4.72216e-64
20341	Selenbp1	-2.36566	4.0733	291.063	2.91744e-65	4.96932e-64
195727	Nhs	-2.9674	3.39938	290.097	4.73565e-65	8.0574e-64
14629	Gclc	1.54332	5.77712	290.024	4.91296e-65	8.34987e-64
73389	Hbp1	-1.55559	6.77862	288.689	9.59761e-65	1.62937e-63
13631	Eef2k	-1.80164	5.0061	288.644	9.81603e-65	1.66462e-63
269633	Wdr86	2.33802	4.94179	288.395	1.11239e-64	1.88434e-63
68298	Ncapd2	-1.97175	5.28445	287.958	1.38523e-64	2.34395e-63
18439	P2rx7	-2.24554	4.45512	287.811	1.4914e-64	2.52083e-63
209086	Samd9l	-2.86499	5.03254	287.381	1.85018e-64	3.12382e-63
67784	Plxnd1	-1.92412	5.58449	286.036	3.63366e-64	6.12832e-63
21810	Tgfbi	-2.27238	3.75532	285.986	3.72638e-64	6.27784e-63
229595	Adamtsl4	-3.011	5.05679	285.964	3.7664e-64	6.33832e-63
16847	Lepr	3.84288	3.36933	285.644	4.42366e-64	7.43628e-63
240725	Sulf1	-1.36407	7.31656	284.89	6.4554e-64	1.08399e-62
104156	Etv5	1.44535	6.46441	284.414	8.19893e-64	1.37526e-62
109205	Sobp	-2.30574	4.61398	284.374	8.36352e-64	1.40134e-62
65970	Lima1	1.34727	8.60923	284.355	8.44644e-64	1.4137e-62
76681	Trim12a	-2.93906	4.04736	284.309	8.63999e-64	1.44453e-62
21452	Tcn2	1.4579	7.20553	284.222	9.02816e-64	1.50779e-62
16447	Ivl	6.86853	2.16912	284.212	9.07293e-64	1.51363e-62
232441	Rerg	3.89034	2.71258	283.671	1.19037e-63	1.98373e-62
433926	Lrrc8b	2.7198	3.39624	283.269	1.4564e-63	2.42445e-62
17174	Masp1	1.8457	6.21934	282.483	2.16017e-63	3.59213e-62
12028	Bax	1.36216	6.48825	282.438	2.20996e-63	3.67096e-62
76199	Med13l	-1.34271	7.64625	282.435	2.21297e-63	3.67201e-62
11975	Atp6v0a1	1.37644	7.02297	281.949	2.8243e-63	4.68135e-62
65962	Slc9a3r2	-1.92759	4.54632	281.667	3.25392e-63	5.38766e-62
208439	Klhl29	-2.30765	4.24319	281.517	3.50718e-63	5.80077e-62
60599	Trp53inp1	1.31283	7.27163	281.235	4.04036e-63	6.67547e-62
12183	Bpgm	1.77868	4.77939	280.999	4.54783e-63	7.50586e-62
19288	Ptx3	-1.72772	8.38871	280.993	4.56266e-63	7.52229e-62
68797	Pdgfrl	-3.30444	4.29154	280.195	6.80859e-63	1.12131e-61
20847	Stat2	-1.75099	5.73114	279.94	7.74053e-63	1.27343e-61
140494	Atp6v0a4	-4.80631	2.41977	279.682	8.80844e-63	1.44757e-61
320679	Samd12	6.83212	1.82638	279.539	9.46266e-63	1.55343e-61
70571	Tcerg1l	10.7074	1.58512	279.522	9.54383e-63	1.56509e-61
77220	Tmem200a	3.17767	3.53176	279.183	1.13142e-62	1.85344e-61
84035	Kremen1	1.39371	7.20455	278.314	1.74992e-62	2.86359e-61
83925	Trps1	-1.51084	5.95467	277.87	2.18616e-62	3.57367e-61
30806	Adamts8	8.46632	1.66932	275.846	6.03807e-62	9.85983e-61
14590	Ggh	1.64107	6.17914	275.768	6.27727e-62	1.02396e-60
30878	Apln	-2.41305	4.3643	275.427	7.44996e-62	1.21397e-60
74919	Slc35f6	1.6915	6.18533	275.326	7.83747e-62	1.27576e-60
216190	Appl2	-1.38315	6.15506	275.247	8.15268e-62	1.32567e-60
75914	Exoc6b	1.32678	6.94948	275.13	8.64787e-62	1.40471e-60
320802	Ifitm10	-1.80168	4.54208	274.838	1.00103e-61	1.62431e-60
19703	Renbp	2.08605	4.37427	274.317	1.30031e-61	2.1077e-60
12808	Cobl	-3.23226	3.45054	274.307	1.30676e-61	2.11593e-60
18024	Nfe2l2	1.31494	7.91993	274.197	1.38084e-61	2.23355e-60
20776	Tmie	-7.88825	1.90389	273.94	1.57133e-61	2.53688e-60
234875	Ttc13	1.41941	6.53947	273.939	1.57166e-61	2.53688e-60
99542	AI115009	-8.47006	1.64259	273.827	1.66259e-61	2.68084e-60
217578	Baz1a	1.51858	6.01447	273.822	1.66684e-61	2.68488e-60
72514	Fgfbp3	1.72272	4.70978	272.834	2.73695e-61	4.40398e-60
207521	Dtx4	1.94362	4.91635	272.449	3.32078e-61	5.33784e-60
66648	Tpgs2	1.67637	5.14801	271.847	4.49217e-61	7.21321e-60
50766	Crim1	1.77929	8.4951	271.602	5.07884e-61	8.14676e-60
223433	Otulinl	3.26846	3.73132	271.462	5.44776e-61	8.72944e-60
394432	Ugt1a7c	2.6567	3.80357	271.318	5.85699e-61	9.37545e-60
212531	Sh3bgrl2	1.90789	4.72063	271.039	6.73763e-61	1.07739e-59
53418	B4galt2	-1.63384	5.51219	270.684	8.05235e-61	1.28585e-59
225997	Trpm6	-3.26069	2.72758	270.682	8.05791e-61	1.28585e-59
21351	Taldo1	1.46608	7.30514	270.647	8.20337e-61	1.3077e-59
13685	Eif4ebp1	1.50044	5.55757	270.639	8.23397e-61	1.31123e-59
50915	Grb14	-1.85851	6.80645	270.558	8.57668e-61	1.36439e-59
13593	Ebf3	-3.17585	2.872	270.514	8.76592e-61	1.39306e-59
94040	Clmn	-2.31573	7.01125	270.486	8.89317e-61	1.41182e-59
11745	Anxa3	1.4783	7.77415	270.237	1.00742e-60	1.59767e-59
56700	Glmp	1.55219	7.6763	269.519	1.44494e-60	2.28918e-59
67252	Cap2	2.71251	3.79178	267.584	3.81492e-60	6.03767e-59
223922	Atf7	-1.34809	6.58664	267.072	4.93368e-60	7.80028e-59
14420	Galc	1.54721	5.41554	267.045	5.00009e-60	7.89718e-59
110532	Adarb1	2.0806	5.30829	267.039	5.01381e-60	7.91073e-59
231207	Cpeb2	1.65349	5.74776	266.835	5.55498e-60	8.75563e-59
233406	Prc1	-1.7841	5.0714	266.205	7.62067e-60	1.19992e-58
20452	St8sia4	4.50233	2.35978	265.992	8.48303e-60	1.33435e-58
93735	Wnt16	-2.50528	4.11361	265.704	9.79967e-60	1.53988e-58
244867	Arhgap20	1.65432	5.33065	265.59	1.03777e-59	1.62904e-58
56348	Hsd17b12	1.48379	6.9181	265.217	1.25163e-59	1.96275e-58
110078	Pygb	-1.34064	7.80999	265.041	1.36684e-59	2.14124e-58
16545	Kera	7.86374	1.97671	264.653	1.66061e-59	2.59881e-58
30060	Meltf	-6.28269	2.04984	264.469	1.82158e-59	2.84783e-58
56349	Net1	1.82135	7.328	264.076	2.2184e-59	3.4647e-58
105348	Golm1	1.54014	5.4189	263.845	2.49153e-59	3.88734e-58
19009	Pou6f1	-1.62789	4.7451	263.673	2.71542e-59	4.23237e-58
244421	Lonrf1	-2.07954	5.24762	263.359	3.17988e-59	4.95129e-58
20970	Sdc3	-1.86692	6.27235	262.94	3.92314e-59	6.10244e-58
16177	Il1r1	-1.32066	6.88179	262.825	4.1558e-59	6.45783e-58
21827	Thbs3	-1.88294	4.41138	262.72	4.38067e-59	6.8004e-58
21985	Tpd52	1.62592	5.23385	262.562	4.74414e-59	7.35724e-58
11966	Atp6v1b2	1.33387	7.22116	262.414	5.10933e-59	7.91562e-58
68852	Lrrn4cl	-2.15243	5.22505	262.411	5.11659e-59	7.9189e-58
243659	Styk1	3.01764	3.40894	262.234	5.59247e-59	8.64673e-58
211652	Wwc1	-2.10698	4.11051	262.079	6.04582e-59	9.3383e-58
108079	Prkaa2	3.0475	3.51601	261.833	6.83965e-59	1.05539e-57
12409	Cbr2	-6.55939	2.47343	261.778	7.02911e-59	1.08354e-57
12560	Cdh3	-2.69158	3.55476	261.74	7.16401e-59	1.10323e-57
66681	Pgm2	1.47438	5.90648	261.487	8.1361e-59	1.25168e-57
20616	Snap91	7.32528	3.40859	261.297	8.94947e-59	1.37544e-57
15901	Id1	1.82459	7.31792	261.14	9.68366e-59	1.48679e-57
64296	Abhd8	1.64024	6.10761	260.712	1.20023e-58	1.84096e-57
107746	Rapgef1	1.32582	7.65639	260.672	1.22445e-58	1.87623e-57
99709	Clca4b	10.569	1.48825	260.557	1.29747e-58	1.98614e-57
20410	Sorbs3	-1.45759	6.43269	260.472	1.35384e-58	2.07038e-57
64540	Tspan4	-1.45879	7.28643	260.398	1.40547e-58	2.14721e-57
67689	Aldh3b1	-2.57326	3.77535	259.81	1.88754e-58	2.88084e-57
66797	Cntnap2	8.35935	1.59087	259.027	2.79596e-58	4.26308e-57
64138	Ctsz	1.34379	8.17413	258.32	3.98688e-58	6.0729e-57
14396	Gabra3	10.5869	1.46887	258.123	4.40174e-58	6.69821e-57
54418	Fmn2	4.96024	1.95021	257.852	5.04435e-58	7.6685e-57
76898	B3gat1	-10.5508	1.45506	257.728	5.36714e-58	8.15118e-57
407790	Ndufa4l2	-3.97908	6.49449	257.684	5.48804e-58	8.32659e-57
330790	Hapln4	4.81136	3.34337	257.487	6.05634e-58	9.17979e-57
12927	Bcar1	1.70279	7.40385	257.326	6.56676e-58	9.94367e-57
15417	Hoxb9	7.01359	1.60906	256.756	8.7432e-58	1.32263e-56
12695	Patj	-2.41973	3.27337	256.385	1.05326e-57	1.59176e-56
73341	Arhgef6	-2.99646	2.9963	255.783	1.42447e-57	2.15065e-56
12868	Cox8a	1.43061	7.51418	255.741	1.45519e-57	2.19489e-56
208936	Adamts18	3.2677	3.95032	255.674	1.50471e-57	2.26737e-56
19714	Rev3l	1.38294	7.42322	255.567	1.5881e-57	2.39069e-56
26362	Axl	1.42252	9.10764	255.544	1.60635e-57	2.41579e-56
114143	Atp6v0b	1.40095	6.56033	255.431	1.70045e-57	2.55482e-56
13383	Dlg1	1.319	8.18861	255.351	1.77013e-57	2.65692e-56
194655	Klf11	-2.62795	3.36405	255.315	1.80162e-57	2.70155e-56
217830	Dglucy	1.76628	4.7732	255	2.11027e-57	3.16131e-56
12632	Cfl2	1.42115	7.34708	254.457	2.77249e-57	4.14931e-56
66958	Tmx2	1.45197	5.90224	254.075	3.35726e-57	5.01962e-56
74840	Manf	1.38563	6.8838	253.945	3.58368e-57	5.35294e-56
21854	Timm17a	1.38786	6.02752	253.936	3.6011e-57	5.37376e-56
77938	Fam53b	-1.59773	5.80023	253.31	4.92922e-57	7.34854e-56
12236	Bub1b	-2.02297	3.91899	253.093	5.49809e-57	8.1887e-56
15473	Rida	1.96959	5.43044	252.995	5.77313e-57	8.59004e-56
216150	Cdc34	1.79144	6.2533	252.967	5.85613e-57	8.70513e-56
380928	Lmo7	-1.66633	6.25784	252.874	6.13595e-57	9.11231e-56
327958	Pitpnm3	-6.01281	1.99086	252.67	6.79648e-57	1.00835e-55
23945	Mgll	2.17285	5.86822	252.378	7.87227e-57	1.16684e-55
57783	Tnip1	-1.57165	5.2422	252.079	9.14323e-57	1.35392e-55
235611	Plxnb1	-1.76247	6.11746	251.283	1.36381e-56	2.01757e-55
20416	Shc1	-1.4101	7.68989	251.228	1.40205e-56	2.07216e-55
21888	Tle4	3.70126	3.99997	251.189	1.42932e-56	2.11044e-55
214137	Arhgap29	-1.57716	7.61394	250.646	1.87763e-56	2.76972e-55
52118	Pvr	1.42391	6.28189	250.621	1.90167e-56	2.8025e-55
12563	Cdh6	6.06589	1.93056	250.058	2.52267e-56	3.71413e-55
52696	Zwint	1.43477	6.85181	249.632	3.12374e-56	4.59469e-55
19713	Ret	-7.51225	3.20634	249.592	3.18697e-56	4.68324e-55
66889	Rnf128	6.13051	5.667	249.379	3.54613e-56	5.20606e-55
14775	Gpx1	1.28177	8.4662	248.994	4.30329e-56	6.31162e-55
56807	Scamp5	1.60309	5.03242	248.533	5.42267e-56	7.94587e-55
17342	Mitf	1.59151	4.85334	248.415	5.75424e-56	8.4237e-55
433485	Syndig1	2.92088	3.28307	248.381	5.85221e-56	8.55899e-55
216148	Shc2	1.65435	5.88092	248.3	6.09595e-56	8.90702e-55
22393	Wfs1	1.6835	6.198	247.81	7.79696e-56	1.13816e-54
69675	Pxdn	-1.33352	8.23625	247.158	1.08144e-55	1.57714e-54
241732	Tspyl3	-2.9802	3.10558	246.879	1.24408e-55	1.81261e-54
13070	Cyp11a1	10.5054	1.40842	246.708	1.35596e-55	1.97375e-54
22330	Vcl	-1.21396	8.5759	246.703	1.35931e-55	1.97677e-54
27059	Sh3d19	-1.46053	6.95311	246.464	1.53233e-55	2.22629e-54
54613	St3gal6	-2.5246	3.47361	246.223	1.72949e-55	2.51036e-54
20308	Ccl9	-7.46925	4.65618	245.992	1.94217e-55	2.81642e-54
71355	Col24a1	3.17554	3.38811	245.826	2.11087e-55	3.05818e-54
17691	Sik1	2.31551	5.2509	245.504	2.48048e-55	3.5903e-54
68212	Tmbim4	1.49045	6.01723	243.868	5.63954e-55	8.15511e-54
97130	C77080	-2.804	3.14491	243.522	6.71093e-55	9.69532e-54
20443	St3gal4	-1.7276	5.41693	243.43	7.02645e-55	1.01416e-53
104009	Qsox1	1.32679	8.5497	243.265	7.63599e-55	1.10111e-53
14860	Gsta4	3.32339	3.39719	243.068	8.42702e-55	1.21404e-53
66090	Ypel3	-1.96044	6.10664	242.973	8.84207e-55	1.27265e-53
54525	Syt7	4.76251	2.19974	242.875	9.28559e-55	1.33524e-53
231549	Lrrc8d	2.49906	3.88524	242.795	9.66596e-55	1.38864e-53
56078	Car5b	-2.70712	3.76644	242.617	1.05707e-54	1.5172e-53
232975	Atp1a3	6.91802	3.41377	242.597	1.06794e-54	1.53137e-53
11988	Slc7a2	-1.3907	6.62009	242.578	1.07779e-54	1.54406e-53
171580	Mical1	-2.58202	3.59341	242.242	1.27581e-54	1.82606e-53
15205	Hes1	2.17597	5.09098	242.134	1.34715e-54	1.92638e-53
11603	Agrn	-1.26631	7.69947	242.095	1.37399e-54	1.96293e-53
225724	Mapk4	6.24838	2.78656	241.937	1.48735e-54	2.12291e-53
19348	Kif20a	-2.42525	4.10829	241.859	1.54693e-54	2.20591e-53
13063	Cycs	1.49118	6.0173	241.343	2.00416e-54	2.85527e-53
68565	Mrps18a	1.49576	5.15488	241.034	2.34018e-54	3.33093e-53
69574	Cmbl	6.27478	3.81851	241.029	2.34571e-54	3.33571e-53
330941	AI593442	6.29914	1.83164	240.497	3.06501e-54	4.35457e-53
234094	Arhgef10	-1.48748	5.48775	240.402	3.21468e-54	4.56302e-53
105522	Ankrd28	-1.30895	6.4193	240.312	3.36306e-54	4.76923e-53
13024	Ctla2a	5.68436	3.55471	239.981	3.96967e-54	5.62431e-53
71461	Ptk7	1.36261	7.41865	239.733	4.49649e-54	6.36487e-53
277360	Prex1	2.95382	3.81856	239.572	4.87531e-54	6.89477e-53
12385	Ctnna1	-1.23492	8.38853	239.435	5.22374e-54	7.37931e-53
22375	Wars	1.28091	6.28222	239.433	5.22751e-54	7.37931e-53
233315	Mtmr10	1.31098	5.95138	239.384	5.35901e-54	7.55801e-53
13649	Egfr	1.37379	7.73487	239.308	5.56635e-54	7.84326e-53
68303	Fam114a1	-1.25619	7.1659	239.005	6.48212e-54	9.12528e-53
241452	Dhrs9	-2.90131	3.18445	238.936	6.71129e-54	9.43929e-53
72472	Slc16a10	3.08764	2.81427	238.313	9.17534e-54	1.28932e-52
71371	Arid5b	-1.31194	6.45501	238.232	9.55272e-54	1.34112e-52
54405	Ndufa1	2.11399	5.21868	238.029	1.05822e-53	1.48431e-52
71712	Dram1	-1.64556	5.02434	237.566	1.33457e-53	1.87021e-52
225998	Rorb	6.01744	2.6255	237.035	1.74262e-53	2.43982e-52
20514	Slc1a5	-1.32393	6.38976	236.878	1.88562e-53	2.63764e-52
54446	Nfat5	-1.21256	8.13468	235.784	3.26615e-53	4.56461e-52
12561	Cdh4	7.0314	1.97871	235.215	4.34711e-53	6.06982e-52
20608	Sstr4	5.16529	1.84898	235.124	4.55018e-53	6.3476e-52
260409	Cdc42ep3	-1.74675	6.34793	234.948	4.97004e-53	6.92704e-52
216724	Rufy1	1.65926	5.61378	234.662	5.73722e-53	7.98909e-52
20230	Satb1	3.86902	2.36899	234.425	6.46101e-53	8.98885e-52
193813	Mcfd2	1.26413	7.69443	234.355	6.69272e-53	9.30283e-52
665113	Tnik	3.65026	3.22914	234.316	6.82585e-53	9.47932e-52
67488	Calcoco1	-1.29126	6.72468	234.162	7.37358e-53	1.02308e-51
268860	Abat	1.3337	5.63059	234.102	7.59839e-53	1.05332e-51
63913	Niban1	1.4618	6.56687	234.035	7.85854e-53	1.0884e-51
50782	Rgs11	-2.42219	3.23031	234.008	7.966e-53	1.1023e-51
14118	Fbn1	-1.27708	9.62734	233.897	8.42511e-53	1.16454e-51
72194	Fbxl20	-1.39322	6.29661	233.895	8.4309e-53	1.16454e-51
333182	Cox6b2	3.12004	4.05628	233.642	9.57494e-53	1.32138e-51
52882	Rgs7bp	3.65443	2.65941	233.305	1.13386e-52	1.56337e-51
227580	C1ql3	4.29043	2.28782	232.993	1.32654e-52	1.8274e-51
21922	Clec3b	-7.10184	1.7673	232.262	1.91447e-52	2.63496e-51
11677	Akr1b3	1.2976	6.73562	232.143	2.03262e-52	2.79508e-51
12521	Cd82	-2.10932	3.9623	231.778	2.44153e-52	3.35439e-51
109264	Me3	-2.28768	3.31354	231.423	2.91822e-52	4.00573e-51
80860	Ghdc	1.60022	5.36488	231.403	2.94641e-52	4.04083e-51
50780	Rgs3	-1.78135	4.72413	231.197	3.26732e-52	4.47695e-51
238330	Irf2bpl	1.6493	7.16529	231.183	3.29145e-52	4.50601e-51
23872	Ets2	-1.60869	6.62237	231.058	3.50452e-52	4.79345e-51
13835	Epha1	-2.23513	3.77337	230.888	3.81648e-52	5.21552e-51
21414	Tcf7	2.59135	4.18315	230.563	4.49246e-52	6.13387e-51
12452	Ccng2	-1.78493	6.01822	230.46	4.73083e-52	6.4536e-51
13823	Epb41l3	1.34957	7.07411	230.189	5.42152e-52	7.38928e-51
277154	Nynrin	-1.41353	5.42218	230.081	5.72499e-52	7.796e-51
227612	Tor4a	-1.39962	5.33682	230.011	5.92754e-52	8.06469e-51
11624	Ahrr	4.0249	3.52428	229.957	6.09162e-52	8.28063e-51
12428	Ccna2	-1.85893	4.28775	229.682	6.99399e-52	9.49889e-51
109154	Mlec	1.22573	9.29593	229.561	7.4311e-52	1.00837e-50
19730	Ralgds	-1.33366	6.02634	228.575	1.21943e-51	1.65326e-50
212111	Inpp5a	1.37288	6.16439	228.232	1.44823e-51	1.96173e-50
227693	Zer1	-1.35952	5.69603	228.153	1.50685e-51	2.03934e-50
57265	Fzd2	-1.64517	7.4623	227.862	1.7447e-51	2.35917e-50
16854	Lgals3	-1.54523	5.93092	227.839	1.76461e-51	2.384e-50
270198	Pfkfb4	1.83857	4.01735	227.651	1.93918e-51	2.61756e-50
22619	Siae	-1.51895	4.85872	227.224	2.40341e-51	3.24134e-50
19212	Pter	1.74695	4.74124	226.94	2.77126e-51	3.73417e-50
19017	Ppargc1a	4.18233	3.43488	226.847	2.90329e-51	3.90866e-50
68026	Pclaf	-2.02847	4.17589	226.822	2.94082e-51	3.95574e-50
211577	Mrgprf	-1.46802	5.64604	226.527	3.41014e-51	4.58303e-50
17448	Mdh2	1.23005	7.93153	226.497	3.46135e-51	4.6478e-50
104383	Rcor2	-2.06418	4.11509	225.959	4.53505e-51	6.08423e-50
18854	Pml	1.26425	6.43792	225.66	5.26948e-51	7.0634e-50
104885	Tmem179	6.56191	2.95733	225.628	5.35501e-51	7.1718e-50
69183	C1qtnf2	5.20503	1.64178	225.533	5.61671e-51	7.51576e-50
14360	Fyn	1.2788	5.84214	225.468	5.80379e-51	7.75936e-50
71943	Tom1l1	1.67622	4.57574	225.427	5.92396e-51	7.91316e-50
67204	Eif2s2	1.36037	7.89184	225.2	6.64025e-51	8.86229e-50
20516	Slc20a2	1.30038	6.14687	225.035	7.21576e-51	9.62206e-50
18032	Nfix	-1.6983	8.87675	224.877	7.80995e-51	1.04054e-49
99045	Mrps26	2.04018	5.98934	224.836	7.97348e-51	1.06141e-49
67896	Ccdc80	-1.59805	9.93257	224.81	8.07724e-51	1.07429e-49
69537	Dnase1l1	-4.34739	2.49625	224.297	1.04518e-50	1.38891e-49
20562	Slit1	6.00856	1.46889	224.204	1.09527e-50	1.45422e-49
67134	Nop56	1.20976	6.59581	223.829	1.32224e-50	1.75407e-49
245607	Gprasp2	-3.52066	2.32851	223.774	1.35892e-50	1.80118e-49
19301	Pxmp2	3.66212	2.26691	223.363	1.67034e-50	2.21205e-49
20720	Serpine2	1.39928	5.72333	223.246	1.7717e-50	2.34427e-49
68119	Cmtm3	1.20676	6.72193	223.237	1.77944e-50	2.35249e-49
14873	Gsto1	1.66544	7.04405	222.972	2.03347e-50	2.68603e-49
328417	Parp4	-1.49079	4.7832	222.847	2.16429e-50	2.85638e-49
277396	Klhl23	-3.49817	2.83896	222.387	2.72732e-50	3.59638e-49
108155	Ogt	-1.29612	8.36266	222.366	2.75661e-50	3.63189e-49
18799	Plcd1	-1.43346	5.69724	222.213	2.97662e-50	3.91841e-49
215615	Rnpep	1.46731	5.70594	222.085	3.17358e-50	4.17412e-49
105853	Mal2	7.06867	1.69057	222.016	3.2861e-50	4.31843e-49
83921	Cemip2	1.16424	6.97548	221.9	3.4825e-50	4.57263e-49
21807	Tsc22d1	-1.36722	9.10596	221.824	3.61823e-50	4.74681e-49
237860	Ssh2	1.86126	6.43734	221.734	3.7854e-50	4.9619e-49
75612	Gns	1.19156	8.79268	221.553	4.14666e-50	5.43082e-49
73504	1700071M16Rik	7.63148	1.69757	221.184	4.9908e-50	6.53083e-49
60527	Fads3	-1.21012	6.96337	221.015	5.43313e-50	7.10362e-49
12904	Crabp2	3.61283	2.2073	220.748	6.21136e-50	8.11425e-49
67838	Dnajb11	1.3085	7.07316	220.661	6.48807e-50	8.46856e-49
54123	Irf7	-3.66403	3.01805	220.338	7.63409e-50	9.95597e-49
11568	Aebp1	1.46007	11.965	220.146	8.4035e-50	1.09501e-48
18563	Pcx	1.79782	6.72338	219.967	9.19563e-50	1.19722e-48
66904	Pccb	-1.41519	5.32437	219.951	9.27081e-50	1.20599e-48
21682	Tec	4.10528	3.66274	219.766	1.01748e-49	1.32246e-48
12892	Cpox	1.47718	5.57429	219.624	1.09259e-49	1.4189e-48
78560	Adgra2	1.44115	8.99689	219.568	1.12342e-49	1.45771e-48
108124	Napa	1.21205	7.74835	219.328	1.26741e-49	1.64316e-48
12479	Cd1d1	-1.67168	4.38137	219.283	1.29625e-49	1.67914e-48
142980	Tlr3	-2.3583	3.2328	219.262	1.3104e-49	1.69603e-48
14469	Gbp2	-2.07912	3.84597	218.835	1.62368e-49	2.09975e-48
67776	Vwa5a	-1.24712	7.28832	218.78	1.66939e-49	2.15705e-48
50530	Mfap5	1.28258	6.78042	218.698	1.73967e-49	2.24598e-48
13723	Emb	-1.52612	8.73055	218.369	2.05144e-49	2.64627e-48
12257	Tspo	-2.74134	5.01387	218.332	2.09081e-49	2.6948e-48
23918	Impdh2	-1.33014	6.20555	218.264	2.16294e-49	2.78545e-48
69806	Slc39a11	1.391	5.24334	217.632	2.97056e-49	3.8223e-48
54447	Asah2	-1.45804	5.00663	217.546	3.10198e-49	3.98807e-48
20496	Slc12a2	-1.20315	6.54312	217.165	3.75664e-49	4.82572e-48
56495	Get3	1.27201	6.25465	217.16	3.76532e-49	4.83284e-48
14660	Gls	-1.13203	8.14008	216.867	4.36281e-49	5.59507e-48
214444	Cdk5rap2	-1.36069	5.58025	216.679	4.7942e-49	6.14319e-48
16431	Itm2a	1.17617	6.77662	216.634	4.90598e-49	6.2812e-48
54396	Irgm2	-2.05005	4.61519	216.586	5.02413e-49	6.42714e-48
20446	St6galnac2	-3.7788	2.51761	216.519	5.19605e-49	6.64155e-48
15958	Ifit2	1.50605	5.61839	216.048	6.5832e-49	8.40763e-48
63873	Trpv4	-2.11547	3.77042	215.9	7.09189e-49	9.04979e-48
240327	Gm4951	-10.3305	1.23091	215.863	7.22534e-49	9.21246e-48
230793	Ahdc1	-2.05177	5.96527	215.835	7.32605e-49	9.33314e-48
18121	Nog	2.84675	3.20659	215.798	7.46604e-49	9.50363e-48
27267	Cars	1.43944	5.94056	215.73	7.72514e-49	9.82533e-48
67844	Rab32	-2.29353	4.27904	215.615	8.18334e-49	1.03995e-47
71310	Tbc1d9	2.73749	3.12887	215.268	9.74223e-49	1.23704e-47
16193	Il6	2.45192	3.67235	215.182	1.01719e-48	1.29053e-47
70099	Smc4	-1.41368	6.66513	214.989	1.12063e-48	1.4206e-47
16414	Itgb2	3.41952	2.58898	214.771	1.25041e-48	1.58382e-47
74199	Vit	-5.58251	2.80152	214.723	1.28052e-48	1.62063e-47
64297	Gprc5b	1.32799	6.60681	214.017	1.82567e-48	2.30867e-47
226830	Smyd2	-1.7776	4.44347	213.151	2.82165e-48	3.56522e-47
18645	Pfn2	1.19557	6.26586	212.675	3.58351e-48	4.52414e-47
232023	Vopp1	1.3594	6.51521	212.651	3.62668e-48	4.57491e-47
72446	Prr5l	2.97946	3.11775	212.575	3.76831e-48	4.74968e-47
11636	Ak1	1.19861	6.87963	212.519	3.87441e-48	4.87942e-47
235106	Ntm	7.55586	1.53646	211.884	5.33109e-48	6.70846e-47
22771	Zic1	3.45765	2.46114	211.515	6.41855e-48	8.0703e-47
78267	Klhdc8b	-2.18279	3.97194	211.299	7.15433e-48	8.9881e-47
17992	Ndufa4	1.23612	6.41746	211.062	8.05793e-48	1.01151e-46
74166	Tmem38a	1.66836	4.30345	210.932	8.59918e-48	1.07857e-46
14182	Fgfr1	-1.23296	8.78309	210.516	1.05983e-47	1.32824e-46
239273	Abcc4	1.70684	4.29277	210.47	1.0849e-47	1.35855e-46
107607	Nod1	-3.01911	3.95635	210.301	1.18086e-47	1.47751e-46
140742	Sesn1	-1.39084	5.1884	210.202	1.24087e-47	1.55134e-46
16911	Lmo4	-1.58856	6.46955	210.166	1.26371e-47	1.57862e-46
74055	Plce1	-1.71837	5.17462	209.914	1.43409e-47	1.79e-46
276952	Rasl10b	3.65951	3.66767	209.626	1.65738e-47	2.06703e-46
50794	Klf13	-1.52005	5.34676	209.579	1.6968e-47	2.11449e-46
73205	C9orf72	1.74451	5.15195	209.53	1.73945e-47	2.16588e-46
58250	Chst11	2.18791	7.62745	209.435	1.82449e-47	2.26994e-46
98417	Cnih4	1.29735	5.75402	209.278	1.97444e-47	2.45452e-46
268783	Mtmr12	-1.40294	5.48338	209.115	2.14293e-47	2.66183e-46
224756	H2-M1	10.3058	1.20862	209.067	2.19544e-47	2.72485e-46
329910	Acot11	-3.11808	2.77078	208.973	2.30146e-47	2.85415e-46
19662	Rbp4	-3.09319	3.65932	208.959	2.31761e-47	2.87186e-46
13120	Cyp4b1	2.96991	3.26975	208.956	2.32062e-47	2.87328e-46
109019	Nabp1	1.72202	5.69707	208.948	2.33054e-47	2.88325e-46
29858	Pmm1	1.2467	6.18563	208.911	2.37398e-47	2.93463e-46
98402	Sh3bp4	1.5673	5.7141	208.767	2.55261e-47	3.15292e-46
107581	Col16a1	-2.51512	7.28775	208.12	3.53253e-47	4.3598e-46
17311	Kitl	2.00733	6.81665	208.069	3.62453e-47	4.46976e-46
56190	Rbm38	3.05632	2.92247	207.689	4.38563e-47	5.40403e-46
68682	Slc44a2	-1.36559	7.96474	207.658	4.45447e-47	5.48448e-46
110006	Gusb	1.15356	6.7475	207.649	4.47538e-47	5.50583e-46
232785	Zfp783	-1.82605	4.00821	207.484	4.86194e-47	5.97662e-46
21788	Tfpi	1.413	6.46239	207.404	5.06133e-47	6.21677e-46
103080	Septin10	-1.93968	4.50002	207.255	5.45472e-47	6.69463e-46
76485	Glt8d1	-1.34871	5.43465	206.443	8.20253e-47	1.0059e-45
26897	Acot1	-1.52488	4.9162	206.402	8.37434e-47	1.02616e-45
12795	Plk3	2.51069	5.21668	206.317	8.73938e-47	1.07004e-45
13822	Epb41l2	-1.11183	7.29657	205.886	1.08504e-46	1.32745e-45
20706	Serpinb9b	2.98775	3.39732	205.731	1.17284e-46	1.43373e-45
246179	Fktn	1.29156	5.87113	205.268	1.47984e-46	1.80759e-45
71819	Kif23	-2.25516	3.59035	205.217	1.51849e-46	1.85333e-45
545055	Cma2	12.1734	7.54094	205.106	1.60568e-46	1.95819e-45
11429	Aco2	1.14877	8.14788	204.98	1.71048e-46	2.08435e-45
246277	Csad	-1.86792	5.45927	204.801	1.8714e-46	2.27864e-45
71733	Susd2	-4.1729	2.45684	204.366	2.32892e-46	2.83349e-45
22083	Ctr9	1.16094	7.47443	204.035	2.75033e-46	3.34356e-45
241308	Ralgps1	2.01566	3.7312	204.031	2.75595e-46	3.34775e-45
66878	Riok3	1.12674	6.9963	204.024	2.76541e-46	3.3566e-45
75750	Slc10a6	-4.93168	2.01041	203.453	3.68475e-46	4.46895e-45
64010	Sav1	-1.31509	7.12939	203.376	3.83036e-46	4.6419e-45
260299	Cadm4	3.03157	4.76842	203.356	3.86757e-46	4.68331e-45
17776	Mast2	1.22926	6.92735	203.139	4.31461e-46	5.22054e-45
65973	Asph	1.27337	7.76584	202.742	5.26635e-46	6.36712e-45
67739	Slc48a1	1.47687	8.12353	202.712	5.3457e-46	6.45799e-45
14675	Gna14	1.78383	4.94785	202.575	5.72733e-46	6.91361e-45
22762	Zfpm2	-1.98141	4.51933	202.214	6.86757e-46	8.28354e-45
110351	Rap1gap	2.24288	3.85034	201.685	8.95774e-46	1.07962e-44
18933	Prrx1	1.4875	10.023	201.604	9.32639e-46	1.12317e-44
238505	Mtr	1.35197	5.52119	201.315	1.07865e-45	1.298e-44
66515	Cul7	-1.30203	7.06996	201.245	1.11752e-45	1.34372e-44
18223	Numbl	-1.3415	6.43235	200.844	1.36684e-45	1.64223e-44
17345	Mki67	-1.64462	6.11828	200.488	1.63396e-45	1.96165e-44
225608	Sh3tc2	-3.27367	2.77324	200.486	1.63617e-45	1.96277e-44
11482	Acvrl1	-1.77966	5.42375	200.256	1.83652e-45	2.20139e-44
12359	Cat	-1.28924	7.5655	200.215	1.87449e-45	2.24517e-44
101240	Wdr91	1.65886	4.67658	200.046	2.04101e-45	2.44271e-44
56710	Brinp1	-3.9062	2.10493	200.032	2.05477e-45	2.45728e-44
94094	Trim34a	-3.39978	2.10212	199.421	2.79384e-45	3.33853e-44
83768	Dpp7	1.57305	5.3427	198.875	3.67489e-45	4.38795e-44
66684	Tceal8	1.534	7.24848	198.554	4.31845e-45	5.15239e-44
101401	Adamts9	1.94353	7.44144	198.519	4.396e-45	5.24086e-44
17076	Ly75	1.62199	5.18009	198.465	4.51616e-45	5.37996e-44
12182	Bst1	-4.91274	2.04696	197.881	6.05645e-45	7.20928e-44
70495	Atp6ap2	1.18205	6.78712	197.603	6.96489e-45	8.28425e-44
69672	Txndc15	1.29672	6.73452	197.446	7.53542e-45	8.95593e-44
16880	Lifr	-1.29638	5.35274	197.423	7.62588e-45	9.05647e-44
12070	Bex3	2.68827	7.31344	197.364	7.85576e-45	9.31973e-44
70974	Pgm2l1	1.78907	4.91937	197.363	7.85965e-45	9.31973e-44
235339	Dlat	1.27487	6.84584	197.068	9.1157e-45	1.08008e-43
69638	Enho	3.56777	3.28337	197.059	9.15377e-45	1.08376e-43
17711	CYTB	1.10665	12.0777	196.986	9.49645e-45	1.12347e-43
20971	Sdc4	-1.15891	8.18139	196.936	9.73888e-45	1.15126e-43
228598	Ebf4	3.46108	4.85892	196.916	9.8364e-45	1.1619e-43
26920	Cntrl	-1.3773	5.10027	196.89	9.96729e-45	1.17646e-43
13717	Eln	-2.5439	4.83471	196.824	1.03035e-44	1.21521e-43
66938	Sh3d21	-3.09398	2.41511	196.66	1.1185e-44	1.31817e-43
17436	Me1	1.22319	7.06184	196.583	1.16285e-44	1.36939e-43
70757	Hacd2	1.43294	6.19122	196.517	1.20187e-44	1.41426e-43
18806	Pld2	-1.40131	4.88703	196.289	1.34778e-44	1.58474e-43
74533	Gzf1	1.29089	6.11061	196.157	1.44011e-44	1.69202e-43
67803	Limd2	-1.51207	5.08434	195.997	1.56135e-44	1.83307e-43
66414	Ndufa12	1.36008	5.46212	195.6	1.90602e-44	2.23601e-43
104725	Sptssa	-1.59923	5.65844	195.355	2.15596e-44	2.52731e-43
242083	Ppm1l	2.19358	4.71378	195.3	2.21612e-44	2.59586e-43
53376	Usp2	2.56029	3.55219	195.271	2.24885e-44	2.63052e-43
53618	Fut8	1.28908	6.32216	195.27	2.24912e-44	2.63052e-43
13396	Dlx6	-3.04118	2.52499	195.248	2.27489e-44	2.65864e-43
68845	Pih1d1	-1.42042	4.79634	195.076	2.48027e-44	2.89647e-43
24115	Best1	-5.08036	1.83245	194.676	3.03244e-44	3.53861e-43
15211	Hexa	1.16517	8.24137	194.625	3.11063e-44	3.6271e-43
12861	Cox6a1	1.14236	7.97139	194.537	3.25063e-44	3.78749e-43
108012	Ap1s2	1.70413	5.54343	194.489	3.33138e-44	3.87864e-43
20773	Sptlc2	1.10801	7.09225	194.341	3.58811e-44	4.1744e-43
72179	Fbxl2	-2.22588	3.9774	194.192	3.86701e-44	4.49548e-43
329540	Nol4l	-1.91298	3.50113	193.982	4.29735e-44	4.99198e-43
207278	Fchsd2	-1.31836	5.83796	193.897	4.48493e-44	5.20596e-43
16373	Irx3	2.30924	6.06464	193.871	4.54284e-44	5.26921e-43
229003	Helz2	-1.88502	5.20012	193.854	4.5829e-44	5.31169e-43
546336	Prrg1	-2.36703	3.34034	193.49	5.50384e-44	6.37428e-43
19659	Rbp1	1.30424	5.21708	193.054	6.84947e-44	7.92677e-43
17300	Foxc1	-1.46089	5.75668	192.501	9.04759e-44	1.04628e-42
226518	Nmnat2	2.7628	2.7095	192.494	9.07727e-44	1.04892e-42
15460	Hr	-3.78805	2.06014	192.417	9.43469e-44	1.08941e-42
12345	Capzb	1.09706	8.85879	192.395	9.54175e-44	1.10094e-42
71772	Plbd2	1.21275	7.98677	192.239	1.03208e-43	1.18994e-42
100040766	Mroh2a	2.78874	3.76398	192.076	1.11996e-43	1.2903e-42
17937	Nab2	-2.01204	5.46425	192.057	1.13086e-43	1.30189e-42
11927	Atox1	1.18592	6.26315	192	1.16367e-43	1.33866e-42
68957	Paqr6	-8.03832	1.16415	191.925	1.2083e-43	1.38896e-42
21676	Tead1	1.09855	9.03732	191.552	1.45733e-43	1.67397e-42
13429	Dnm1	-1.49773	6.06103	191.467	1.52093e-43	1.74573e-42
381677	Vgf	2.77107	5.71702	191.382	1.58709e-43	1.82032e-42
78334	Cdk19	-1.2138	5.68697	191.355	1.60907e-43	1.84414e-42
16783	Lamp1	1.24907	10.1739	191.278	1.67268e-43	1.91563e-42
60344	Fign	-2.36392	3.21573	191.232	1.71203e-43	1.95924e-42
22059	Trp53	-1.13532	6.40492	191.162	1.77304e-43	2.02755e-42
215418	Csrnp1	2.26443	3.34133	191.153	1.78054e-43	2.03462e-42
58909	Fam13a	2.88861	3.84675	191	1.92301e-43	2.19579e-42
75599	Pcdh1	2.75937	3.23236	190.977	1.94597e-43	2.22037e-42
28169	Agpat3	1.1057	6.78028	190.755	2.1756e-43	2.48054e-42
28075	Desi1	1.24304	5.72901	190.611	2.339e-43	2.66486e-42
50760	Fbxo17	-2.13734	3.30472	190.508	2.46245e-43	2.80345e-42
216049	Zfp365	1.65691	4.60302	190.438	2.55159e-43	2.90278e-42
67952	Tomm20	1.08587	7.32643	190.347	2.66987e-43	3.0351e-42
80285	Parp9	-2.2217	3.94181	190.271	2.77482e-43	3.15209e-42
17750	Mt2	1.68332	6.65186	190.249	2.80507e-43	3.1841e-42
14085	Fah	-2.52558	3.56577	190.115	3.00115e-43	3.40417e-42
20339	Sele	7.70218	2.26696	189.818	3.48298e-43	3.94781e-42
72512	Sting1	-1.37021	5.10838	189.597	3.89358e-43	4.40996e-42
13527	Dtna	2.01382	4.24108	189.553	3.98008e-43	4.50462e-42
105670	Rcbtb2	-1.50332	5.33585	189.531	4.02456e-43	4.55162e-42
17231	Mcpt8	3.4384	2.76522	189.506	4.07524e-43	4.60556e-42
13131	Dab1	7.95896	1.22214	189.436	4.22044e-43	4.76616e-42
19401	Rara	-2.0902	4.96507	189.157	4.85661e-43	5.48057e-42
20541	Slc8a1	2.27753	3.8135	188.946	5.39984e-43	6.08914e-42
68743	Anln	-1.7125	5.86569	188.943	5.40707e-43	6.09284e-42
228026	Pdk1	-1.55513	6.8354	188.722	6.04498e-43	6.80667e-42
217154	Stac2	3.08575	3.9967	188.604	6.41253e-43	7.21527e-42
20271	Scn5a	4.41891	2.81927	188.141	8.09306e-43	9.09953e-42
17768	Mthfd2	1.58359	4.74877	188.003	8.67654e-43	9.74846e-42
110595	Timp4	3.03025	3.74685	187.919	9.04958e-43	1.01602e-41
77975	Tmem50b	1.38843	5.83186	187.713	1.00348e-42	1.12582e-41
14200	Fhl2	-1.23396	6.7538	187.685	1.01762e-42	1.14084e-41
18108	Nmt2	1.55312	6.29294	187.636	1.0434e-42	1.1689e-41
15078	H3f3a	-1.30486	6.63592	187.468	1.13492e-42	1.2705e-41
15361	Hmga1	2.00874	7.14672	187.393	1.17875e-42	1.31861e-41
320302	Glt28d2	-5.3135	1.26631	187.076	1.38242e-42	1.54533e-41
216551	Lgalsl	1.323	6.36119	187.012	1.42755e-42	1.59461e-41
16194	Il6ra	-2.46416	3.3207	186.831	1.56374e-42	1.74547e-41
20583	Snai2	1.34932	6.53526	186.715	1.65716e-42	1.84747e-41
235379	Gldn	6.25842	1.90684	186.715	1.65751e-42	1.84747e-41
26903	Dysf	1.59069	5.50879	186.634	1.72661e-42	1.9231e-41
18654	Pgf	5.21616	3.29144	186.575	1.77808e-42	1.979e-41
14815	Nr3c1	-1.34235	6.99474	186.569	1.78337e-42	1.98346e-41
208624	Alg3	1.37162	4.82341	186.349	1.99236e-42	2.21429e-41
239096	Cdh24	2.02044	3.76178	185.633	2.85482e-42	3.17054e-41
17719	ND4	1.08518	10.9757	185.503	3.04846e-42	3.38315e-41
72421	Ttc30b	-1.74179	4.22549	185.488	3.07024e-42	3.40488e-41
21814	Tgfbr3	-1.14701	7.89136	185.125	3.68616e-42	4.08498e-41
27386	Npas3	2.7296	2.37822	185.092	3.74723e-42	4.14968e-41
320528	Vps13c	1.22982	6.26104	185.084	3.76304e-42	4.1642e-41
12291	Cacna1g	1.40892	6.2805	184.824	4.28767e-42	4.74136e-41
76527	Il34	-3.48196	2.82796	184.54	4.94563e-42	5.46501e-41
11520	Plin2	1.17384	6.8789	183.994	6.50599e-42	7.18409e-41
69188	Kmt2e	-1.06125	6.9941	183.828	7.07486e-42	7.80666e-41
29875	Iqgap1	-1.06722	7.95326	183.72	7.46785e-42	8.23441e-41
50789	Fbxl3	-1.13636	6.20203	183.381	8.85578e-42	9.75782e-41
12161	Bmp6	2.99352	4.60101	183.255	9.43445e-42	1.0388e-40
12890	Cplx2	1.39857	4.68089	182.975	1.08627e-41	1.1952e-40
239559	A4galt	-4.68905	1.95172	182.877	1.14076e-41	1.25427e-40
72461	Prcp	-1.67314	4.51073	182.727	1.23038e-41	1.35184e-40
100115376	Trdj1	10.0917	0.988207	182.499	1.37943e-41	1.51452e-40
98193	Dcaf8	-1.12201	7.32374	182.448	1.41576e-41	1.55331e-40
229694	AI504432	5.58751	1.70323	182.429	1.42915e-41	1.56689e-40
67389	C1qtnf12	-3.64441	3.19049	182.371	1.47158e-41	1.61225e-40
223455	Marchf6	1.10251	7.38918	182.24	1.57161e-41	1.72063e-40
17131	Smad7	2.0532	5.89971	182.13	1.6611e-41	1.81731e-40
381605	Tbc1d2	2.19692	3.84919	182	1.77298e-41	1.93833e-40
21416	Tcf7l2	-1.65036	4.96681	181.914	1.85139e-41	2.02262e-40
12176	Bnip3	-1.69529	7.31201	181.9	1.86443e-41	2.03543e-40
108902	B4gat1	1.28386	6.26326	181.818	1.9428e-41	2.11948e-40
83453	Chrdl1	-7.84816	4.09245	181.796	1.96451e-41	2.14165e-40
21753	Tes	1.47981	6.02482	181.726	2.03464e-41	2.21654e-40
13653	Egr1	-2.71704	5.77413	181.657	2.10728e-41	2.29405e-40
545260	Arsi	-1.77709	3.67638	181.359	2.44722e-41	2.66224e-40
16432	Itm2b	-1.04815	9.66638	181.157	2.70955e-41	2.94553e-40
11973	Atp6v1e1	1.13093	7.03921	181.069	2.83195e-41	3.07643e-40
22247	Umps	1.22647	5.50002	180.947	3.01049e-41	3.26808e-40
18442	P2ry2	3.68966	2.34588	180.843	3.17184e-41	3.44081e-40
85030	Tnfrsf25	-4.98071	2.03324	180.797	3.24698e-41	3.51984e-40
242409	Tmem8b	-1.53277	4.64308	180.795	3.25008e-41	3.52073e-40
56448	Cyp2d22	1.88425	5.22119	180.65	3.49547e-41	3.7839e-40
11749	Anxa6	1.04735	9.29965	180.532	3.70872e-41	4.01192e-40
22710	Zfp52	2.10244	5.20085	179.98	4.89493e-41	5.2914e-40
13400	Dmpk	1.97905	6.96124	179.85	5.22685e-41	5.64624e-40
12288	Cacna1c	1.65598	5.9576	179.733	5.54222e-41	5.98272e-40
14389	Gab2	1.68966	4.39163	179.67	5.72143e-41	6.17185e-40
209200	Dtx3l	-2.01609	3.50309	179.497	6.23938e-41	6.72588e-40
72780	Rspo3	-3.45105	2.0823	179.069	7.74073e-41	8.33845e-40
235402	Lingo1	-2.01617	3.1668	178.988	8.06106e-41	8.67746e-40
20296	Ccl2	2.19995	4.31869	178.915	8.36396e-41	8.99724e-40
22288	Utrn	-1.14022	7.00742	178.783	8.93593e-41	9.60582e-40
12317	Calr	1.06335	10.0329	178.72	9.22333e-41	9.90785e-40
19663	Rbpms	1.65272	4.80665	178.708	9.27854e-41	9.96021e-40
50768	Dlc1	-1.24432	7.14466	178.701	9.31115e-41	9.98827e-40
14263	Fmo5	-2.86318	3.01066	178.65	9.55311e-41	1.02407e-39
69784	1500009L16Rik	-2.99303	2.29147	178.602	9.78898e-41	1.04863e-39
108800	Ston2	2.2646	3.01991	178.08	1.27217e-40	1.36184e-39
18028	Nfib	-1.35335	6.85452	178.038	1.29966e-40	1.3903e-39
17708	COX1	1.24472	13.6538	177.887	1.40238e-40	1.49915e-39
84652	Fam126a	1.19789	6.79545	177.358	1.82906e-40	1.95391e-39
16164	Il13ra1	-1.44087	6.02201	177.342	1.8441e-40	1.96861e-39
15526	Hspa9	1.10411	8.39382	176.746	2.48808e-40	2.65423e-39
19024	Ppfibp2	2.89394	2.28009	176.72	2.52138e-40	2.68791e-39
100526474	Mir3074-1	-2.60324	2.73488	176.68	2.5725e-40	2.7405e-39
100041194	Ahnak2	-1.43247	6.07727	176.643	2.62135e-40	2.79062e-39
12696	Cirbp	-1.30632	5.59523	176.613	2.66065e-40	2.83049e-39
67035	Dnajb4	1.22841	6.23624	176.376	2.99756e-40	3.18671e-39
66868	Mfsd1	1.04847	7.23994	176.348	3.04003e-40	3.22964e-39
56364	Zmym3	-1.21811	5.74398	176.279	3.14757e-40	3.34158e-39
52120	Hgsnat	1.30302	7.25082	176.24	3.20903e-40	3.40448e-39
105559	Mbnl2	-1.08737	7.57864	176.14	3.37498e-40	3.57809e-39
12983	Csf2rb	6.34749	1.41362	176.116	3.41515e-40	3.61818e-39
14755	Pigq	1.17652	6.28656	175.944	3.72521e-40	3.94396e-39
105298	Epdr1	-1.23117	5.91544	175.863	3.87844e-40	4.10337e-39
20648	Snta1	1.63264	5.36042	175.825	3.95493e-40	4.18143e-39
26417	Mapk3	-1.17052	7.33273	175.75	4.10674e-40	4.33896e-39
54519	Apbb1ip	1.57137	5.18756	175.38	4.94681e-40	5.22295e-39
72543	Mvb12b	-1.78299	5.10559	175.172	5.49204e-40	5.79464e-39
210982	Bicral	-1.40233	4.61571	174.857	6.43286e-40	6.78266e-39
22003	Tpm1	1.03555	10.1848	174.426	7.99111e-40	8.41989e-39
277414	Trp53i11	2.33264	4.58614	174.368	8.22471e-40	8.66011e-39
20708	Serpinb6b	1.73749	4.59827	174.251	8.72664e-40	9.18234e-39
73102	Slc22a23	2.93398	2.91424	174.133	9.25769e-40	9.73447e-39
67426	Coq8a	-3.32644	3.67448	174.1	9.41254e-40	9.89055e-39
54394	Crlf3	-1.34408	5.5819	174.078	9.51755e-40	9.99407e-39
235542	Ppp2r3a	-1.38843	5.29059	173.999	9.90134e-40	1.039e-38
17999	Nedd4	-1.25482	10.9918	173.789	1.10058e-39	1.15411e-38
268396	Sh3pxd2b	1.22186	8.08496	173.701	1.15063e-39	1.20578e-38
237759	Col23a1	-1.63313	4.9776	173.644	1.18403e-39	1.23993e-38
233328	Lrrk1	-1.11735	6.3944	173.541	1.24662e-39	1.30459e-38
15258	Hipk2	1.32862	6.09776	173.424	1.32223e-39	1.38244e-38
217692	Sipa1l1	1.14238	7.97697	173.423	1.3228e-39	1.38244e-38
56464	Ctsf	-1.39872	5.82781	173.37	1.35872e-39	1.41902e-38
30805	Slc22a4	3.50687	1.78253	173.198	1.48157e-39	1.54627e-38
14239	Foxs1	3.95931	3.1991	172.726	1.87833e-39	1.95903e-38
11727	Ang	1.99436	3.57766	172.657	1.94503e-39	2.02723e-38
70701	Nipal1	1.87471	3.43241	172.244	2.3937e-39	2.49317e-38
67564	Tmem35a	3.01281	3.42661	171.948	2.77819e-39	2.89168e-38
12465	Cct5	1.20533	8.43119	171.861	2.90231e-39	3.01884e-38
16706	Ksr1	-1.37875	5.21883	171.815	2.97032e-39	3.08749e-38
57296	Psmd8	1.1117	7.60043	171.799	2.9946e-39	3.11063e-38
67880	Dcxr	1.39493	4.70495	171.548	3.39636e-39	3.52559e-38
17158	Man2a1	1.04673	8.02629	171.408	3.64544e-39	3.78159e-38
97863	Fam8a1	1.05998	6.89583	171.324	3.8015e-39	3.94083e-38
21386	Tbx3	2.36618	3.0774	171.321	3.80691e-39	3.94379e-38
50799	Slc25a13	-1.91846	3.78306	171.238	3.97042e-39	4.11041e-38
17385	Mmp11	2.03034	7.06988	171.22	4.00611e-39	4.14457e-38
11606	Agt	-6.2038	1.3898	171.187	4.07263e-39	4.21057e-38
54650	Sfmbt1	1.15811	5.60685	170.694	5.21854e-39	5.39167e-38
98496	Pid1	1.72646	3.9892	170.69	5.23009e-39	5.39999e-38
14544	Gda	1.48939	4.82116	170.507	5.73408e-39	5.91639e-38
72508	Rps6kb1	1.06714	6.70483	170.48	5.81153e-39	5.99229e-38
26921	Map4k4	1.04165	8.80995	170.337	6.24554e-39	6.43549e-38
67749	Mgarp	1.80111	4.45418	169.844	8.0046e-39	8.24254e-38
223646	Naprt	-1.94119	3.51985	169.799	8.1862e-39	8.42392e-38
67266	Dipk1a	-1.36842	4.79267	169.771	8.30123e-39	8.53659e-38
18140	Uhrf1	-1.55076	4.28249	169.673	8.72047e-39	8.96174e-38
20254	Scg2	-4.39334	2.15911	169.649	8.82898e-39	9.0672e-38
67378	Bbs2	-1.86651	3.88228	169.561	9.22703e-39	9.46969e-38
106064	Rimoc1	-1.09084	6.86221	169.416	9.9269e-39	1.01812e-37
67298	Gprasp1	-1.21698	5.85747	169.323	1.04011e-38	1.06604e-37
15437	Hoxd8	2.56017	3.51077	169.257	1.07506e-38	1.10113e-37
19141	Lgmn	1.22068	7.93979	169.212	1.09945e-38	1.12537e-37
328977	Zfp532	-1.09117	5.79719	169.192	1.11089e-38	1.13632e-37
327655	Ppip5k1	1.30642	5.04624	169.103	1.16193e-38	1.18775e-37
319278	Shfl	-1.8592	3.65619	169.052	1.19199e-38	1.21766e-37
23790	Coro1c	1.06865	6.54031	168.986	1.23213e-38	1.25783e-37
100503530	Gm11351	9.97272	0.87675	168.816	1.34198e-38	1.36907e-37
58223	Mmp19	-1.18681	5.40223	168.785	1.36297e-38	1.38956e-37
17879	Myh1	2.35479	6.59665	168.731	1.40056e-38	1.42695e-37
235380	Dmxl2	1.81566	4.27284	168.633	1.47134e-38	1.49806e-37
13197	Gadd45a	1.62162	5.83743	168.629	1.4744e-38	1.50019e-37
100862072	Gm21451	2.51575	2.59545	168.611	1.48806e-38	1.51309e-37
93890	Pcdhb19	-2.15308	3.22871	168.508	1.56701e-38	1.59232e-37
234734	Aars	1.07152	7.59351	168.442	1.61946e-38	1.64453e-37
228094	Cerkl	-2.75411	2.23751	168.191	1.83813e-38	1.86536e-37
71723	Dhx34	1.18192	5.48162	168.023	1.99964e-38	2.02792e-37
94353	Hmgn3	1.89633	5.89883	167.645	2.41839e-38	2.45098e-37
106672	AI413582	1.91195	3.87762	167.29	2.89084e-38	2.92788e-37
14788	Gpr162	-2.04206	4.05302	167.037	3.28411e-38	3.324e-37
14936	Gys1	-1.13164	6.44203	166.964	3.40558e-38	3.44469e-37
21844	Tiam1	-1.61062	4.75213	166.951	3.42865e-38	3.46574e-37
12834	Col6a2	-1.34398	8.97581	166.909	3.5021e-38	3.53768e-37
51801	Ramp1	-2.00516	3.42479	166.679	3.93153e-38	3.96886e-37
18133	Ccn3	2.61925	6.8605	166.577	4.13855e-38	4.17511e-37
73447	Wdr13	-1.08952	5.82494	166.53	4.23712e-38	4.27175e-37
52637	Cisd1	1.40756	4.99299	166.502	4.29702e-38	4.32932e-37
73873	Fam161a	2.17474	3.46936	166.487	4.32952e-38	4.35921e-37
56096	Plac1	4.85974	2.84101	166.445	4.42145e-38	4.44887e-37
223435	Trio	1.20355	7.81739	166.354	4.62899e-38	4.65466e-37
22240	Dpysl3	1.04902	8.26873	166.033	5.44146e-38	5.46806e-37
16157	Il11ra1	-1.00335	6.94885	165.784	6.16681e-38	6.19292e-37
18553	Pcsk6	-1.11893	6.49802	165.631	6.65907e-38	6.68291e-37
17684	Cited2	-1.05487	6.22526	165.499	7.11806e-38	7.1389e-37
229900	Gbp7	-2.46403	3.19679	165.265	8.00518e-38	8.0234e-37
224454	Zdhhc14	2.71107	3.05388	165.048	8.92991e-38	8.94441e-37
73750	Whrn	2.12835	3.71422	165.01	9.10359e-38	9.11246e-37
58182	Prokr1	-3.09007	3.35252	164.886	9.68728e-38	9.69043e-37
66313	Smurf2	-1.00814	6.83244	164.738	1.04366e-37	1.04332e-36
22142	Tuba1a	-0.9923	9.68786	164.733	1.04649e-37	1.04547e-36
16998	Ltbp3	-1.59637	8.50727	164.715	1.05585e-37	1.05414e-36
213019	Pdlim2	-1.40085	6.96176	164.554	1.14505e-37	1.14246e-36
212974	Pgghg	-1.27749	4.91631	164.514	1.16828e-37	1.16488e-36
22138	Ttn	1.94902	5.08826	163.982	1.52678e-37	1.52135e-36
18557	Cdk18	1.60783	4.10726	163.939	1.55962e-37	1.55307e-36
15937	Ier3	1.53728	6.44675	163.882	1.60496e-37	1.59719e-36
240427	Setbp1	-1.07596	5.98515	163.61	1.84048e-37	1.83039e-36
320165	Tacc1	-1.02974	6.60749	163.59	1.85907e-37	1.84768e-36
72351	Ptar1	1.84488	3.8312	163.437	2.00799e-37	1.9944e-36
64945	Cldn12	1.26052	5.47136	163.379	2.06705e-37	2.05175e-36
433938	Mn1	-2.07856	6.00214	162.96	2.55265e-37	2.53212e-36
74772	Atp13a2	1.73063	6.01886	162.901	2.6287e-37	2.60587e-36
67198	Spats2l	-1.73059	4.12875	162.691	2.92264e-37	2.8954e-36
224807	Tmem63b	1.21984	6.22552	162.664	2.96219e-37	2.9327e-36
319801	Tigar	1.66404	3.93744	162.529	3.17044e-37	3.13686e-36
71939	Apol6	-3.03607	1.97545	162.425	3.34077e-37	3.30327e-36
211446	Exoc3	1.11302	6.91591	162.299	3.56013e-37	3.51791e-36
13805	Eng	1.10822	6.24193	162.2	3.74177e-37	3.69502e-36
210573	Tmem151b	3.34828	3.4102	162.117	3.89964e-37	3.84846e-36
15932	Idua	-1.37378	4.58933	162.074	3.98559e-37	3.93076e-36
114479	Slc5a5	5.13285	1.11959	162.071	3.99121e-37	3.93379e-36
237339	L3mbtl3	1.16837	5.66929	162.061	4.01109e-37	3.95086e-36
18293	Ogdh	0.989659	7.92692	161.899	4.35172e-37	4.28363e-36
11877	Arvcf	2.2267	3.70536	161.791	4.5948e-37	4.52002e-36
17150	Mfap2	-1.85155	5.3409	161.746	4.70106e-37	4.62161e-36
15289	Hmgb1	-1.01051	7.89736	161.702	4.80674e-37	4.72249e-36
72039	Mccc1	1.29516	5.26836	161.459	5.43103e-37	5.33244e-36
71946	Endod1	1.44537	4.79781	161.365	5.69521e-37	5.58827e-36
70572	Ipo5	1.02833	8.00337	161.209	6.15939e-37	6.03989e-36
77605	H2az2	-1.61879	5.27065	161.188	6.22379e-37	6.09915e-36
211401	Mtss1	-1.4106	5.06918	161.181	6.24548e-37	6.11653e-36
234825	Klhdc4	1.37826	4.83715	161.174	6.26833e-37	6.135e-36
76156	Fam131b	1.41737	4.30259	160.968	6.95427e-37	6.80203e-36
67951	Tubb6	1.20169	7.71595	160.833	7.44103e-37	7.27352e-36
20852	Stat6	-1.09032	6.47755	160.821	7.486e-37	7.31284e-36
14677	Gnai1	1.58618	4.82345	160.761	7.71729e-37	7.53121e-36
72386	2610035D17Rik	-2.49473	2.79236	160.76	7.71931e-37	7.53121e-36
347722	Agap1	1.26197	5.46786	160.668	8.08494e-37	7.88294e-36
114606	Tle6	-2.6799	3.37516	160.62	8.28337e-37	8.07131e-36
621976	Tmem170b	1.39964	4.47578	160.329	9.58761e-37	9.33626e-36
56404	Trip4	1.53187	6.87745	160.313	9.66541e-37	9.40608e-36
170625	Snx18	1.00602	8.06994	160.253	9.96376e-37	9.69031e-36
60440	Iigp1	-5.67695	3.20802	160.192	1.02732e-36	9.98492e-36
17721	ND5	1.11167	11.599	160.157	1.04549e-36	1.01551e-35
56524	Pals2	1.70796	5.28735	160.079	1.08745e-36	1.05561e-35
29816	Hip1r	-2.34633	3.49651	159.853	1.21843e-36	1.182e-35
12316	Aspm	-1.95143	3.68951	159.821	1.23798e-36	1.20022e-35
226151	Slf2	1.14042	6.27308	159.809	1.2457e-36	1.20695e-35
225875	Lrfn4	-1.98931	4.64129	159.564	1.40886e-36	1.36417e-35
18667	Pgr	9.87556	0.812168	159.552	1.41749e-36	1.37166e-35
244152	Tsku	1.18837	5.1172	159.374	1.55021e-36	1.49916e-35
68493	Ndufaf4	1.40587	4.67882	159.129	1.75364e-36	1.69482e-35
108000	Cenpf	-2.10985	4.1842	159.081	1.79655e-36	1.7352e-35
99899	Ifi44	-5.89454	2.5433	159.043	1.83119e-36	1.76755e-35
70673	Prdm16	-1.61549	4.1932	158.993	1.87812e-36	1.81172e-35
192678	Rassf3	1.58963	4.68011	158.917	1.95071e-36	1.88056e-35
18027	Nfia	-1.3822	5.49084	158.734	2.1395e-36	2.06127e-35
18479	Pak1	-1.40901	5.39123	158.692	2.18528e-36	2.10406e-35
100213	Rusc2	1.79924	7.65975	158.322	2.63148e-36	2.5321e-35
18595	Pdgfra	1.12361	10.5135	158.075	2.98094e-36	2.86657e-35
66162	Bola2	1.27179	5.38661	158.04	3.03246e-36	2.9143e-35
211255	Kbtbd7	-1.83057	3.73585	157.929	3.2068e-36	3.07993e-35
66629	Golph3	-1.1498	7.472	157.664	3.66511e-36	3.51792e-35
13640	Efna5	-1.7409	4.49114	157.553	3.87496e-36	3.71702e-35
244198	Olfml1	-1.4542	4.65078	157.479	4.02218e-36	3.85584e-35
14245	Lpin1	-1.24634	4.95959	157.444	4.09347e-36	3.92175e-35
225362	Reep2	3.60871	2.41208	157.435	4.11298e-36	3.93799e-35
13650	Rhbdf1	-1.27966	6.06989	157.427	4.1284e-36	3.9503e-35
234857	Spire2	-3.35129	2.48184	157.286	4.43346e-36	4.23957e-35
70419	2810408A11Rik	-2.66083	2.39452	157.214	4.5964e-36	4.39265e-35
11504	Adamts1	1.57526	8.13967	157.048	4.99713e-36	4.77266e-35
67299	Dock7	-1.22906	7.88203	156.994	5.13397e-36	4.90032e-35
59095	Fxyd6	1.4128	6.14948	156.993	5.13787e-36	4.901e-35
18817	Plk1	-1.83988	3.79291	156.573	6.3468e-36	6.05046e-35
223827	Gxylt1	1.07388	5.88548	156.505	6.56531e-36	6.25489e-35
211666	Mgst2	-3.63099	2.74703	156.409	6.88971e-36	6.5599e-35
26934	Racgap1	-1.80011	4.63422	156.327	7.18265e-36	6.8346e-35
12835	Col6a3	1.62665	8.78631	156.32	7.20598e-36	6.85257e-35
52331	Stbd1	1.82382	3.49631	156.295	7.29628e-36	6.93417e-35
218442	Serinc5	1.18038	6.08154	156.19	7.69512e-36	7.3087e-35
18750	Prkca	-1.03343	6.44797	156.001	8.46188e-36	8.03202e-35
107094	Rrp12	1.31973	4.8928	155.976	8.56825e-36	8.12798e-35
19339	Rab3a	1.3822	4.3526	155.799	9.36537e-36	8.87867e-35
19106	Eif2ak2	-1.37291	5.63026	155.6	1.03523e-35	9.80824e-35
68304	Poglut3	-1.24783	5.78103	155.578	1.04711e-35	9.91474e-35
56358	Copz2	-1.09898	5.98679	155.496	1.09104e-35	1.03244e-34
19159	Cyth3	-1.08144	6.3872	155.428	1.12911e-35	1.06781e-34
233781	Xylt1	-3.19029	4.00791	155.275	1.21897e-35	1.15208e-34
30937	Lmcd1	1.63334	6.70657	155.167	1.28721e-35	1.21583e-34
74154	Unkl	-1.67917	3.65717	155.161	1.29129e-35	1.21894e-34
233552	Gdpd5	1.69905	3.7575	155.085	1.34157e-35	1.26562e-34
99526	Usp53	1.4205	4.79646	154.719	1.61294e-35	1.5207e-34
66087	Emc3	1.09546	7.33809	154.638	1.67976e-35	1.58273e-34
68817	Ddi2	-0.986368	6.58269	154.525	1.77833e-35	1.67459e-34
381694	B3glct	-1.20437	5.15662	154.012	2.30201e-35	2.16639e-34
20620	Plk2	-0.953849	7.77857	153.709	2.68071e-35	2.52124e-34
66184	Rps4l	1.32463	4.93214	153.667	2.73903e-35	2.57452e-34
17965	Nbl1	2.21235	8.43297	153.436	3.07648e-35	2.88995e-34
234595	Slc38a7	1.34459	5.66449	153.432	3.08209e-35	2.89345e-34
236900	Pdk3	-1.09344	5.52088	153.28	3.32696e-35	3.12143e-34
19063	Ppt1	1.18536	7.39561	153.144	3.56367e-35	3.34149e-34
67834	Idh3a	1.15368	6.41619	152.875	4.07957e-35	3.82289e-34
17181	Matn2	-1.24541	6.80613	152.833	4.1656e-35	3.90114e-34
68955	Srrm4	3.88423	2.0736	152.666	4.53128e-35	4.24102e-34
212483	Fam193b	-1.30398	6.13919	152.638	4.59647e-35	4.29943e-34
69748	Aldh16a1	-1.39583	4.25836	152.347	5.32179e-35	4.97485e-34
15212	Hexb	1.02119	6.16509	152.344	5.32918e-35	4.97875e-34
70676	Gulp1	-1.31192	7.20919	152.198	5.73497e-35	5.35461e-34
230073	Ddx58	-1.65756	5.89092	152.124	5.95251e-35	5.55436e-34
15939	Ier5	2.15138	6.80618	151.993	6.35838e-35	5.92949e-34
235527	Plscr4	-4.82608	2.69785	151.845	6.85062e-35	6.38466e-34
64213	St7	1.71307	4.4233	151.777	7.0888e-35	6.60265e-34
14923	Guk1	1.15401	5.19871	151.602	7.7425e-35	7.20716e-34
233977	Ppfia1	0.951111	7.20998	151.481	8.22635e-35	7.65293e-34
234593	Ndrg4	1.06703	6.22992	151.451	8.35224e-35	7.76537e-34
14583	Gfpt1	1.09699	7.75201	151.394	8.59766e-35	7.98873e-34
278507	Wfikkn2	-3.91942	2.35157	151.256	9.21325e-35	8.55555e-34
279706	Nup62cl	5.58523	1.68588	151.169	9.62848e-35	8.93576e-34
192231	Hexim1	-1.0556	6.48969	151.14	9.76818e-35	9.05995e-34
71751	Map3k13	2.54716	2.84601	151.045	1.02472e-34	9.49851e-34
16181	Il1rn	-7.677	4.24825	150.984	1.05658e-34	9.78795e-34
26889	Cln8	1.15375	5.58371	150.904	1.09999e-34	1.0184e-33
77864	Ypel2	-1.57928	3.73332	150.839	1.13661e-34	1.05167e-33
231712	Trafd1	-1.0878	5.74633	150.548	1.31581e-34	1.21675e-33
19268	Ptprf	-1.6027	6.38831	150.517	1.33637e-34	1.23502e-33
15360	Hmgcs2	-4.34311	1.52526	150.274	1.51007e-34	1.39471e-33
12337	Capn5	1.30203	4.69746	150.265	1.51714e-34	1.40041e-33
15331	Hmgn2	-1.44292	6.21914	150.218	1.55344e-34	1.43305e-33
107358	Tm9sf3	1.05416	9.03352	150.207	1.56237e-34	1.44043e-33
17722	ND6	1.19925	9.46012	150.065	1.67792e-34	1.54603e-33
19885	Rorc	-6.01749	1.43866	150.053	1.68779e-34	1.5542e-33
65247	Asb1	1.20701	5.69231	149.914	1.81013e-34	1.66586e-33
229517	Slc25a44	1.04902	5.70795	149.887	1.835e-34	1.68774e-33
212307	Mapre2	1.04796	6.17456	149.643	2.07505e-34	1.90739e-33
17190	Mbd1	1.23547	5.72563	149.458	2.27762e-34	2.09234e-33
12864	Cox6c	1.43755	7.84441	149.366	2.38506e-34	2.18974e-33
52443	Mrpl48	-1.29616	4.45576	149.344	2.4116e-34	2.21278e-33
329628	Fat4	-1.18839	7.02563	149.197	2.59677e-34	2.38127e-33
64291	Osbpl1a	-1.2725	4.87766	149.177	2.62281e-34	2.40373e-33
70762	Dclk2	1.32789	4.89431	149.042	2.80818e-34	2.57208e-33
75805	Nln	1.06622	6.31534	149.011	2.85134e-34	2.61006e-33
12010	B2m	-1.23738	8.49297	148.832	3.12144e-34	2.8556e-33
268903	Nrip1	1.15257	5.71985	148.823	3.13455e-34	2.8659e-33
67149	Nkain1	1.85101	4.16505	148.793	3.18188e-34	2.90745e-33
242687	Wasf2	-1.17924	7.24564	148.679	3.36986e-34	3.07739e-33
56484	Foxo3	-0.978463	6.52208	148.595	3.51678e-34	3.20966e-33
103694	Tmed4	0.947392	6.88006	148.57	3.56134e-34	3.2484e-33
52009	Jpt2	-1.50274	4.97319	148.454	3.77549e-34	3.44171e-33
101497	Plekhg2	-1.44265	5.80437	148.425	3.83076e-34	3.49002e-33
66985	Rassf7	-2.24355	2.60235	148.258	4.16634e-34	3.79351e-33
19099	Mapk8ip1	1.36978	5.10498	148.25	4.18373e-34	3.80709e-33
58172	Sertad2	-1.24341	6.10644	148.108	4.49194e-34	4.08515e-33
404710	Iqgap3	-1.62757	3.5895	148.093	4.52626e-34	4.11393e-33
12950	Hapln1	-2.86849	3.54996	147.89	5.01414e-34	4.55469e-33
17919	Myo5b	9.80566	0.71169	147.883	5.0317e-34	4.56794e-33
71564	Izumo4	-1.91761	3.54415	147.779	5.30171e-34	4.81024e-33
75607	Wnk2	-5.50525	1.18711	147.747	5.38829e-34	4.88591e-33
70551	Tmtc4	1.06056	6.45672	147.554	5.93761e-34	5.38085e-33
67467	Gpalpp1	1.13301	6.08097	147.396	6.42961e-34	5.8233e-33
14400	Gabrb1	5.91759	1.99851	147.261	6.87981e-34	6.22738e-33
68828	Sync	-3.12698	1.77439	147.155	7.25839e-34	6.5662e-33
93711	Pcdhga3	-1.87915	3.83641	146.921	8.16481e-34	7.38185e-33
83486	Rbm5	-0.975838	7.67035	146.558	9.80112e-34	8.85605e-33
54375	Azin1	0.95193	6.80753	146.495	1.01181e-33	9.13715e-33
223753	Cerk	1.44273	5.05767	146.487	1.01575e-33	9.16732e-33
20887	Sult1a1	-3.7274	1.58803	146.363	1.08144e-33	9.75444e-33
74190	Exoc3l4	-3.75697	3.85103	146.334	1.09756e-33	9.89406e-33
67512	Agpat2	-1.89957	3.28591	146.222	1.16111e-33	1.04608e-32
14466	Gba	1.08988	6.4517	146.125	1.2193e-33	1.09787e-32
14462	Gata3	4.35255	1.22109	145.991	1.3038e-33	1.17326e-32
19270	Ptprg	0.974553	6.82463	145.672	1.53089e-33	1.37682e-32
71962	Castor1	-2.10309	3.41494	145.619	1.57257e-33	1.41348e-32
15229	Foxd1	-2.45661	4.57081	145.478	1.68802e-33	1.51637e-32
78755	Fam122b	1.42528	4.2168	145.425	1.73369e-33	1.55648e-32
243961	Shank1	-1.9573	3.599	145.381	1.77306e-33	1.5909e-32
11987	Slc7a1	1.11892	5.47313	145.329	1.81989e-33	1.63198e-32
14187	Akr1b8	1.46274	5.44572	145.211	1.93095e-33	1.73055e-32
207304	Hectd1	0.930602	8.37022	145.107	2.03469e-33	1.82247e-32
55936	Ctps2	-1.072	5.61579	145.077	2.0665e-33	1.84989e-32
208263	Tor1aip1	-1.15877	6.14213	145.021	2.12511e-33	1.90125e-32
56551	Txn2	1.00075	6.81271	144.807	2.36718e-33	2.1166e-32
68066	Slc25a39	1.02427	6.99983	144.654	2.55618e-33	2.28426e-32
18131	Notch3	1.28724	4.79988	144.651	2.56008e-33	2.28642e-32
217353	Tmc6	-1.60824	4.23778	144.528	2.72394e-33	2.43136e-32
69146	Gsdmd	-1.60232	4.11392	144.52	2.73521e-33	2.44e-32
319480	Itga11	-1.03402	7.63798	144.341	2.99189e-33	2.66743e-32
71586	Ifih1	-2.11653	3.32335	144.303	3.05022e-33	2.71787e-32
20856	Stc2	1.63398	4.64229	144.291	3.06821e-33	2.73232e-32
20266	Scn1b	-1.55946	4.92209	144.161	3.2769e-33	2.91648e-32
12061	Bdkrb1	2.92972	1.79253	144.022	3.51298e-33	3.12479e-32
17224	Mcpt1	9.73782	0.670316	143.861	3.81132e-33	3.38821e-32
69718	Ipmk	1.16015	5.30347	143.842	3.84706e-33	3.41801e-32
51902	Rnf24	1.16927	4.96387	143.534	4.49209e-33	3.9888e-32
74427	Eaf1	1.12884	6.11673	143.504	4.55986e-33	4.04664e-32
106522	Pkdcc	1.72625	5.6935	143.395	4.81698e-33	4.27237e-32
12576	Cdkn1b	-0.95203	6.90241	143.366	4.8885e-33	4.33331e-32
67533	Ppfibp1	-1.00256	8.02118	143.139	5.48159e-33	4.85625e-32
13038	Ctsk	-1.11084	5.34307	143.137	5.48682e-33	4.85809e-32
13660	Ehd1	1.28194	7.39395	143.121	5.5296e-33	4.89316e-32
12799	Cnp	-1.39224	4.14925	143.086	5.62949e-33	4.97869e-32
52662	Ldlrad4	-2.30003	3.60824	142.969	5.97049e-33	5.27724e-32
77018	Col25a1	2.51302	3.0776	142.682	6.8983e-33	6.09383e-32
102857	Slc6a8	1.319	7.22825	142.609	7.15768e-33	6.31934e-32
21687	Tek	-2.4962	2.57834	142.584	7.24751e-33	6.39499e-32
17242	Mdk	-1.11131	5.89416	142.56	7.33418e-33	6.46776e-32
68176	Inka1	-2.94447	2.11451	142.502	7.55356e-33	6.65741e-32
66111	Tmed3	0.966527	7.24478	142.485	7.61756e-33	6.70998e-32
227059	Slc39a10	1.10188	6.55983	142.417	7.88281e-33	6.93967e-32
277010	Marveld1	-1.13141	6.5433	142.321	8.27559e-33	7.28129e-32
73804	Kif2c	-2.2418	3.23998	142.2	8.79113e-33	7.73048e-32
18195	Nsf	1.0846	6.14822	142.184	8.8656e-33	7.79152e-32
101113	Snx21	-1.43056	4.58754	142.126	9.12654e-33	8.01627e-32
217946	Cdca7l	-2.40891	2.45863	141.944	1.00026e-32	8.78079e-32
66790	Grtp1	3.57063	2.37456	141.857	1.04532e-32	9.17105e-32
240753	Plekha6	2.88963	2.12883	141.543	1.22415e-32	1.07339e-31
331004	Slc9a9	1.90213	3.29595	141.491	1.25635e-32	1.101e-31
319660	Agmo	-3.88176	1.48417	141.436	1.29152e-32	1.13119e-31
67647	4930523C07Rik	-2.16703	3.42734	141.202	1.45371e-32	1.27251e-31
11593	Aga	1.02736	6.16678	141.181	1.46877e-32	1.28496e-31
11637	Ak2	1.02956	5.94914	141.091	1.53708e-32	1.34396e-31
216725	Adamts2	1.12627	8.75398	140.972	1.63178e-32	1.42596e-31
21355	Tap2	-1.38874	4.54103	140.862	1.72434e-32	1.50599e-31
53375	Mtx2	1.09931	5.51483	140.489	2.08118e-32	1.81661e-31
106585	Ankrd12	1.0127	6.52267	140.485	2.08494e-32	1.81887e-31
69259	Kctd5	1.12466	6.44926	140.437	2.13643e-32	1.86273e-31
383295	Ypel5	1.21316	6.48104	140.269	2.32455e-32	2.02561e-31
17713	Grpel1	1.06663	5.54193	140.209	2.39573e-32	2.08645e-31
58235	Nectin1	1.35335	4.64249	140.206	2.39943e-32	2.08849e-31
12396	Cbfa2t2	1.31114	6.28056	140.142	2.47831e-32	2.15593e-31
234356	Csgalnact1	-1.50003	4.838	140.016	2.64015e-32	2.29542e-31
12017	Bag1	0.932721	7.10944	139.991	2.67417e-32	2.32369e-31
15277	Hk2	1.82572	6.42133	139.978	2.6912e-32	2.33717e-31
226856	Lpgat1	-0.930113	6.5677	139.906	2.79065e-32	2.42218e-31
544752	Tug1	-0.987239	6.54459	139.882	2.82514e-32	2.45074e-31
67419	Armh4	-1.09576	5.06513	139.634	3.20085e-32	2.77509e-31
20336	Exoc4	1.05547	7.27891	139.549	3.34008e-32	2.89417e-31
71778	Klhl5	-1.04084	6.14602	139.53	3.37359e-32	2.92157e-31
55927	Hes6	1.38425	5.28586	139.423	3.56023e-32	3.08147e-31
232078	Thnsl2	-2.31635	3.01966	139.395	3.60961e-32	3.12245e-31
20475	Six5	-2.71422	4.60281	139.284	3.81663e-32	3.29968e-31
14933	Gk	1.64423	3.80955	139.178	4.02613e-32	3.47886e-31
14114	Fbln1	-1.27224	6.84745	139.171	4.04148e-32	3.49016e-31
320717	Pptc7	1.05823	5.61093	139.006	4.39075e-32	3.78966e-31
100040617	Wincr1	3.20898	2.36274	138.988	4.43073e-32	3.82203e-31
22134	Tgoln1	0.938493	7.96404	138.924	4.57586e-32	3.94501e-31
17748	Mt1	1.40473	7.40856	138.658	5.23274e-32	4.50881e-31
66225	Llph	1.32252	4.60701	138.64	5.28062e-32	4.54753e-31
14252	Flot2	-0.967395	6.4073	138.601	5.38345e-32	4.6335e-31
14955	H19	-2.1058	9.53221	138.408	5.93274e-32	5.10342e-31
240505	Cdc42bpg	1.36447	6.3294	138.366	6.06098e-32	5.21082e-31
11499	Adam5	-4.20914	1.32211	138.347	6.11776e-32	5.2567e-31
11515	Adcy9	-1.51057	3.7473	138.293	6.2864e-32	5.3986e-31
213573	Cracr2b	-3.11307	1.72917	138.107	6.90678e-32	5.92806e-31
75985	Rab30	-1.40283	4.00122	138.103	6.92023e-32	5.9363e-31
232337	Zfp637	-1.09657	5.50801	137.955	7.45324e-32	6.38997e-31
18114	Rrp1	0.9246	7.66074	137.87	7.78004e-32	6.66645e-31
667034	Pnp2	-3.15634	2.30462	137.857	7.83063e-32	6.70606e-31
16504	Kcnc3	3.51243	2.20711	137.797	8.07249e-32	6.90935e-31
225115	Svil	0.943514	7.25837	137.791	8.09586e-32	6.92551e-31
230784	Sesn2	1.34332	5.59256	137.728	8.35706e-32	7.14498e-31
20020	Polr2a	-1.13155	7.17762	137.644	8.71836e-32	7.44975e-31
407819	BC031181	1.06932	6.36712	137.642	8.72659e-32	7.45265e-31
22289	Kdm6a	-1.12222	5.04667	137.587	8.97053e-32	7.65674e-31
14299	Ncs1	-1.21232	5.64013	137.423	9.74595e-32	8.31399e-31
67087	Ctnnbip1	-1.48445	4.43482	137.308	1.03246e-31	8.80274e-31
18417	Cldn11	6.36691	1.2651	137.114	1.13845e-31	9.70108e-31
16531	Kcnma1	4.59755	1.5966	137.112	1.1395e-31	9.70462e-31
52906	Ahi1	1.09819	5.2208	137.023	1.19218e-31	1.01477e-30
103140	Gstt3	-1.97923	3.45958	136.748	1.36894e-31	1.16458e-30
64103	Tnmd	-4.48292	2.54689	136.685	1.41303e-31	1.20143e-30
234878	Map3k21	-9.64777	0.549893	136.632	1.45113e-31	1.23314e-30
13848	Ephb6	-2.34352	3.13511	136.399	1.63236e-31	1.38638e-30
26557	Homer2	-6.24904	1.17908	136.181	1.82119e-31	1.54591e-30
18074	Nid2	1.30356	8.11167	136.049	1.94654e-31	1.6514e-30
432442	Akap7	-1.61884	4.29573	136.033	1.96206e-31	1.66365e-30
16182	Il18r1	-5.21927	1.26692	136.028	1.9672e-31	1.66709e-30
50490	Nox4	-3.13097	3.95392	135.647	2.38302e-31	2.01836e-30
54124	Cks1b	-1.18262	5.12497	135.594	2.44741e-31	2.07176e-30
14941	Gzmd	8.18651	0.642908	135.56	2.48972e-31	2.10642e-30
18099	Nlk	1.22879	5.17279	135.464	2.61315e-31	2.20964e-30
107975	Pacs1	-1.19683	5.29086	135.449	2.63303e-31	2.22522e-30
216443	Mars1	0.977229	6.48766	135.184	3.00976e-31	2.54222e-30
80797	Clca3a2	4.65316	2.83619	135.034	3.24612e-31	2.74036e-30
216543	Cep68	-1.2218	4.77757	134.933	3.41428e-31	2.88074e-30
18845	Plxna2	1.28623	6.5371	134.909	3.45574e-31	2.91413e-30
102465620	Mir7025	3.94902	1.76455	134.804	3.64413e-31	3.07131e-30
17067	Ly6c1	2.16844	5.10523	134.801	3.6492e-31	3.0739e-30
56012	Pgam2	1.57171	3.5437	134.544	4.15433e-31	3.49749e-30
407243	Peds1	1.10046	5.05322	134.479	4.29235e-31	3.61171e-30
74025	Nphp3	-1.69141	4.02703	134.464	4.32545e-31	3.63758e-30
71306	Mfap3l	2.16601	2.98482	134.456	4.34317e-31	3.65049e-30
72393	Faim2	4.98425	2.0576	134.345	4.59118e-31	3.85684e-30
14789	P3h3	-1.30816	7.55076	134.315	4.66207e-31	3.91426e-30
20877	Aurkb	-1.91146	3.0817	134.302	4.69232e-31	3.93751e-30
226251	Ablim1	-2.17826	4.11674	134.29	4.72001e-31	3.95859e-30
67454	Ikbip	1.13366	7.54407	134.159	5.04279e-31	4.22511e-30
70375	Ica1l	3.58178	1.37136	134.159	5.04328e-31	4.22511e-30
71982	Snx10	-1.05833	5.34602	134.023	5.40121e-31	4.52252e-30
67579	Cpeb4	0.974519	5.91508	133.925	5.67386e-31	4.74824e-30
235041	Kank2	-1.09598	7.15374	133.604	6.67103e-31	5.57971e-30
67712	Slc25a37	0.95973	6.07157	133.599	6.68611e-31	5.58928e-30
56794	Hacl1	-1.71372	3.48307	133.339	7.62015e-31	6.36665e-30
13641	Efnb1	-1.72355	6.82128	133.329	7.65943e-31	6.39599e-30
235283	Gramd1b	1.7063	3.72359	133.255	7.95203e-31	6.63673e-30
71435	Arhgap21	-1.0151	6.73337	133.173	8.2884e-31	6.91373e-30
19088	Prkar2b	-1.40934	4.44645	132.981	9.12898e-31	7.61078e-30
236733	Usp11	-1.10615	5.13034	132.92	9.41397e-31	7.84413e-30
14579	Gem	-1.51423	3.93264	132.793	1.00339e-30	8.35613e-30
231093	Agbl5	-1.55716	3.65157	132.754	1.0235e-30	8.51906e-30
72630	Hspa12b	-2.83752	1.92013	132.675	1.06513e-30	8.86079e-30
208647	Creb3l2	-1.02142	7.24851	132.639	1.08456e-30	9.01756e-30
12444	Ccnd2	0.934226	9.16489	132.608	1.10133e-30	9.152e-30
329872	Frem1	2.71242	2.68982	132.567	1.12467e-30	9.33817e-30
17927	Myod1	2.26739	2.50666	132.566	1.12494e-30	9.33817e-30
17318	Mid1	-1.28923	4.6845	132.546	1.13667e-30	9.43046e-30
230779	Serinc2	-1.68844	3.92218	132.521	1.15072e-30	9.54191e-30
13642	Efnb2	0.918593	6.88227	132.466	1.18305e-30	9.80468e-30
243931	Tshz3	1.57295	4.39676	132.442	1.19761e-30	9.92005e-30
56149	Tamalin	2.42947	5.79698	132.42	1.21079e-30	1.00238e-29
245867	Pcmtd2	-1.00793	5.9883	132.332	1.26591e-30	1.04745e-29
20964	Syn1	2.08687	2.78219	132.296	1.28913e-30	1.06609e-29
215008	Vezt	-1.06153	5.41764	132.277	1.30147e-30	1.07572e-29
252875	Mios	-1.25091	4.94222	132.274	1.30303e-30	1.07643e-29
93686	Rbfox2	-0.939397	7.65041	132.244	1.32302e-30	1.09236e-29
320790	Chd7	2.72282	2.46219	132.227	1.33441e-30	1.10117e-29
72898	Asphd2	2.9016	2.57147	132.217	1.34125e-30	1.10623e-29
74122	Tmem43	1.01746	7.34984	132.182	1.36529e-30	1.12495e-29
72137	Wdsub1	-1.17323	4.64568	132.182	1.36541e-30	1.12495e-29
230075	Ndufb6	1.22795	4.70578	132.138	1.39552e-30	1.14914e-29
54126	Arhgef7	0.926985	6.61751	132.066	1.44725e-30	1.1911e-29
217310	Hid1	1.90734	4.22902	131.968	1.52082e-30	1.25098e-29
217333	Trim47	-4.50278	3.59837	131.914	1.56212e-30	1.28427e-29
328162	Trmt61a	1.48675	4.03594	131.893	1.57919e-30	1.29761e-29
19359	Rad23b	0.877771	8.0138	131.83	1.6302e-30	1.33882e-29
74754	Dhcr24	1.18613	5.7987	131.781	1.67063e-30	1.37129e-29
70397	Tmem70	1.45598	6.11425	131.642	1.79202e-30	1.47014e-29
108673	Ccdc86	1.27112	4.69732	131.515	1.91032e-30	1.56636e-29
76792	Spring1	1.08171	5.7037	131.481	1.9434e-30	1.59264e-29
108699	Chn1	2.02558	2.74549	131.382	2.04284e-30	1.67324e-29
245945	Rbm47	3.77012	2.2758	131.359	2.06639e-30	1.69163e-29
67630	Samd8	1.09974	5.57942	131.317	2.11027e-30	1.72664e-29
216963	Git1	1.05404	7.09137	131.3	2.12882e-30	1.74089e-29
67306	Zc2hc1a	-1.0764	6.02637	131.292	2.13751e-30	1.74707e-29
21916	Tmod1	3.26881	2.47843	131.254	2.17914e-30	1.78015e-29
64293	Stk32b	-5.81107	1.60339	131.105	2.34904e-30	1.91793e-29
70257	Atp5mpl	1.05728	5.49017	131.02	2.45136e-30	2.00041e-29
240028	Lnpep	-1.10332	6.50285	130.965	2.51966e-30	2.05506e-29
66694	Uqcrfs1	1.04016	6.36005	130.924	2.57308e-30	2.09751e-29
18414	Osmr	-0.976462	8.39173	130.664	2.9325e-30	2.38924e-29
104681	Slc16a6	2.64202	2.23171	130.439	3.28496e-30	2.675e-29
53970	Rfx5	-1.94018	4.02578	130.387	3.3711e-30	2.74369e-29
22245	Uck1	1.03813	5.72066	130.366	3.40746e-30	2.77182e-29
226861	Hhat	-2.15028	2.64129	130.343	3.44672e-30	2.80228e-29
11421	Ace	-3.87422	1.47243	130.23	3.64936e-30	2.96547e-29
192786	Rapgef6	-1.02284	5.74335	130.132	3.83324e-30	3.11324e-29
52552	Parp8	1.05895	5.95961	130.112	3.87221e-30	3.14324e-29
80288	Bcl9l	-1.77653	6.65352	130.095	3.90597e-30	3.16898e-29
12866	Cox7a2	0.953955	6.32184	130.072	3.95234e-30	3.20491e-29
71481	Alpk1	-1.45781	4.05953	130.015	4.06775e-30	3.29676e-29
110960	Tars	0.932575	6.63497	129.986	4.12751e-30	3.34344e-29
216873	Spag7	-1.1964	4.87268	129.913	4.28072e-30	3.46572e-29
68032	Emc4	1.26522	5.40806	129.86	4.39753e-30	3.55842e-29
12728	Clcn5	1.0889	5.39775	129.751	4.64488e-30	3.7566e-29
320782	Tmem154	-1.59336	3.593	129.578	5.06763e-30	4.09635e-29
99031	Osbpl6	1.83208	4.05061	129.566	5.09816e-30	4.11888e-29
217340	Rnf157	1.7942	4.25048	129.563	5.10788e-30	4.12457e-29
227094	Nemp2	-2.43681	2.6578	129.553	5.13357e-30	4.14314e-29
230316	Megf9	-1.08759	6.31395	129.525	5.20525e-30	4.19879e-29
329384	Ptrh1	1.35239	4.40147	129.491	5.29497e-30	4.26893e-29
56457	Clptm1	0.911114	7.64962	129.469	5.35513e-30	4.31517e-29
12022	Barx1	-1.84569	3.21495	129.283	5.88049e-30	4.73604e-29
224530	Acat3	-3.36523	1.63375	129.245	5.995e-30	4.82574e-29
14635	Galk1	-1.26545	5.42551	129.077	6.52392e-30	5.24876e-29
12321	Calu	0.974439	10.4395	129.058	6.58715e-30	5.29686e-29
233765	Plekha7	-2.08989	4.0591	128.989	6.81925e-30	5.48065e-29
11820	App	-0.893797	10.4443	128.877	7.21503e-30	5.79571e-29
239188	Enox1	2.12574	3.15454	128.862	7.2713e-30	5.83787e-29
20257	Stmn2	2.84077	3.74805	128.752	7.68279e-30	6.16503e-29
14705	Bscl2	0.938305	6.07477	128.747	7.70492e-30	6.17957e-29
69938	Scrn1	1.21614	4.74953	128.712	7.84084e-30	6.28531e-29
110521	Hivep1	0.95914	6.62051	128.638	8.13684e-30	6.5192e-29
18218	Dusp8	1.4282	3.84296	128.625	8.19388e-30	6.56149e-29
69121	Chrdl2	-5.29657	2.72711	128.558	8.47434e-30	6.78255e-29
70028	Dop1b	-1.06782	5.36954	128.358	9.37014e-30	7.49562e-29
239217	Kctd12	1.50016	5.08249	128.256	9.86383e-30	7.88646e-29
56543	Kcnd3	3.49446	2.37804	128.155	1.0379e-29	8.29402e-29
12373	Casq2	1.79311	4.52548	128.037	1.1019e-29	8.80092e-29
109168	Atl3	-1.00577	7.76798	127.991	1.12773e-29	9.00257e-29
24110	Usp18	-3.76065	2.2672	127.797	1.24314e-29	9.9187e-29
52187	Rragd	2.9924	2.11711	127.709	1.29993e-29	1.03665e-28
98910	Usp6nl	-1.17856	4.62538	127.702	1.30449e-29	1.03975e-28
67224	Med29	1.11571	4.83567	127.677	1.32109e-29	1.05243e-28
66129	Prxl2c	-1.38884	3.98694	127.628	1.35361e-29	1.07778e-28
19263	Ptprb	5.32448	1.2291	127.62	1.35909e-29	1.08159e-28
12259	C1qa	-9.54777	0.444511	127.411	1.50999e-29	1.20106e-28
382253	Cdkl5	-1.97192	2.86316	127.324	1.57772e-29	1.25429e-28
327959	Xaf1	-3.04207	3.60422	127.19	1.6879e-29	1.34118e-28
67016	Tbc1d2b	0.908778	7.60278	127.092	1.77401e-29	1.40888e-28
17717	ND2	1.0865	10.7475	127.082	1.78209e-29	1.41457e-28
209760	Tmc7	3.39767	1.47369	127.072	1.79173e-29	1.42149e-28
11658	Alcam	1.41011	4.08571	126.828	2.02579e-29	1.60636e-28
66143	Eef1e1	1.21985	4.34203	126.809	2.04536e-29	1.62104e-28
66071	Ethe1	1.37847	4.20051	126.8	2.05432e-29	1.6273e-28
11477	Acvr1	-1.01947	5.57011	126.789	2.06648e-29	1.6361e-28
19664	Rbpj	-0.948688	8.04183	126.747	2.11047e-29	1.67006e-28
16952	Anxa1	-1.22004	8.1461	126.738	2.11944e-29	1.6763e-28
78781	Zc3hav1	-0.993359	5.57794	126.631	2.23703e-29	1.7684e-28
19261	Sirpa	-1.01197	5.36563	126.579	2.29708e-29	1.81494e-28
56811	Dkk2	2.206	3.74185	126.566	2.31166e-29	1.82553e-28
226641	Atf6	0.992884	6.56727	126.533	2.3502e-29	1.85501e-28
67767	Jagn1	1.03802	5.14264	126.508	2.38022e-29	1.87774e-28
192976	Lrrc75a	1.51119	4.23397	126.428	2.47887e-29	1.95456e-28
69546	Mapk1ip1	-1.59552	3.75481	126.399	2.51539e-29	1.98235e-28
233103	Garre1	-1.03985	5.70118	126.386	2.53186e-29	1.99431e-28
329470	Accs	-1.62618	3.53189	126.354	2.57269e-29	2.02544e-28
51886	Fubp1	-1.06105	6.6916	126.271	2.68188e-29	2.11032e-28
20810	Srm	0.950731	6.25386	126.248	2.71328e-29	2.13394e-28
21685	Tef	-0.945591	6.50879	126.03	3.02836e-29	2.38053e-28
229927	Clca3b	7.43597	0.69438	125.952	3.15082e-29	2.47553e-28
170643	Kirrel	-0.876827	8.13222	125.853	3.3113e-29	2.60029e-28
74574	Lvrn	2.32549	3.44908	125.825	3.3576e-29	2.6353e-28
14057	Sfxn1	1.0245	6.04648	125.773	3.44678e-29	2.70392e-28
18578	Pde4b	1.01118	6.20784	125.662	3.6464e-29	2.85907e-28
21942	Tnfrsf9	2.31695	3.02076	125.644	3.67863e-29	2.88287e-28
434197	Fam169b	1.56953	4.84539	125.629	3.70691e-29	2.90355e-28
66513	Tab1	-1.27404	4.24664	125.595	3.77068e-29	2.95201e-28
20363	Selenop	-0.940014	7.51763	125.494	3.96812e-29	3.105e-28
210274	Shank2	4.85213	2.88882	125.445	4.06779e-29	3.18138e-28
16573	Kif5b	0.894706	8.12186	125.365	4.2339e-29	3.30961e-28
239114	Il17d	-3.95657	1.97868	125.351	4.26411e-29	3.33154e-28
78444	Pgpep1l	2.40143	3.89775	125.343	4.28064e-29	3.34276e-28
226075	Glis3	0.980133	7.72042	125.327	4.31645e-29	3.36902e-28
99167	Ssx2ip	1.50295	4.58995	125.318	4.33548e-29	3.38215e-28
244891	Scaper	-1.12827	4.70396	125.313	4.34573e-29	3.38844e-28
94089	Trim7	1.84357	2.80841	125.17	4.67078e-29	3.64004e-28
239606	Slc2a13	1.13269	5.1458	125.111	4.81269e-29	3.74874e-28
110033	Kif22	-1.67494	3.36989	125.068	4.91757e-29	3.8285e-28
19271	Ptprj	1.11593	5.16501	125.034	5.00226e-29	3.89247e-28
77041	Arsk	-1.29708	4.89981	124.97	5.16726e-29	4.01884e-28
106369	Ypel1	-1.51789	3.59736	124.88	5.4059e-29	4.20231e-28
330908	Opcml	3.11216	1.4606	124.844	5.50673e-29	4.27854e-28
13663	Ei24	0.934208	6.12556	124.802	5.62397e-29	4.36743e-28
69976	Galk2	-0.994132	5.59394	124.658	6.04569e-29	4.69256e-28
211586	Tfdp2	-1.27568	5.16466	124.587	6.26767e-29	4.86242e-28
100043772	Zfp850	1.80403	3.08129	124.275	7.33374e-29	5.6866e-28
100042480	Nhsl2	1.80611	4.10981	124.018	8.35003e-29	6.47138e-28
228432	Ano3	3.21086	1.63753	123.992	8.4595e-29	6.55292e-28
12759	Clu	-1.41896	6.90226	123.81	9.2723e-29	7.17893e-28
80892	Zfhx4	-0.948871	7.11786	123.781	9.40622e-29	7.27896e-28
69737	Ttl	0.99042	5.75684	123.675	9.92394e-29	7.67574e-28
69219	Ddah1	1.17162	7.98175	123.668	9.95897e-29	7.69898e-28
117160	Ttyh2	1.13411	5.58815	123.531	1.06725e-28	8.24644e-28
108013	Celf4	2.04787	3.9234	123.401	1.13916e-28	8.7977e-28
244810	AW551984	-2.68853	1.91922	123.224	1.24567e-28	9.61539e-28
18793	Plaur	1.51317	4.71584	123.149	1.29372e-28	9.98132e-28
55979	Agpat1	0.891506	6.75626	123.121	1.31172e-28	1.01152e-27
66890	Lman2	0.89181	8.13118	122.834	1.51596e-28	1.16842e-27
12977	Csf1	1.19146	9.75181	122.81	1.53447e-28	1.1821e-27
18263	Odc1	-1.27563	8.1557	122.705	1.61773e-28	1.24562e-27
14159	Fes	-4.74761	3.12556	122.553	1.74729e-28	1.34471e-27
76432	2310001H17Rik	-3.22607	1.39845	122.507	1.78797e-28	1.37533e-27
269823	Pon3	-1.3231	4.52651	122.483	1.80953e-28	1.39122e-27
210789	Tbc1d4	-1.97995	3.35585	122.442	1.84706e-28	1.41937e-27
11835	Ar	-1.61252	4.22211	122.394	1.89284e-28	1.45382e-27
17425	Foxk1	-1.27911	5.69847	122.305	1.97952e-28	1.51964e-27
20181	Rxra	-1.05605	6.46518	122.286	1.99809e-28	1.53313e-27
13175	Dclk1	-1.22211	7.0699	122.277	2.00726e-28	1.5394e-27
76630	Stambpl1	1.38165	4.9912	122.26	2.02522e-28	1.5524e-27
239447	Colec10	7.15278	1.19224	122.144	2.14634e-28	1.64442e-27
17876	Myef2	0.940333	6.1485	122.115	2.17862e-28	1.66833e-27
17873	Gadd45b	-1.30095	5.28624	122.025	2.28e-28	1.7451e-27
14615	Gjc1	-1.40178	4.81042	121.867	2.46826e-28	1.88825e-27
215114	Hip1	1.02435	6.85403	121.79	2.56631e-28	1.96229e-27
11854	Rhod	1.20581	5.462	121.734	2.64023e-28	2.01781e-27
67054	Paics	-0.905923	7.4249	121.667	2.72986e-28	2.08527e-27
11981	Atp9a	1.27037	5.78127	121.26	3.35262e-28	2.55971e-27
15366	Hmmr	-1.61911	3.82234	121.256	3.35815e-28	2.56267e-27
270151	Nlrx1	-1.55232	4.07387	121.234	3.39588e-28	2.59018e-27
672511	Rnf213	-1.37168	6.56738	121.192	3.46848e-28	2.64424e-27
66686	Dcbld1	1.58286	3.69453	121.172	3.5034e-28	2.66954e-27
360213	Trim46	-1.63172	4.23581	121.138	3.56391e-28	2.71431e-27
17428	Mnt	-1.26111	4.72628	121.1	3.63401e-28	2.76633e-27
17155	Man1a	-0.95769	6.29901	121.085	3.66169e-28	2.78603e-27
671535	Parp10	-1.98118	3.48586	121.024	3.77536e-28	2.8711e-27
68897	Disp1	1.02803	5.28385	120.963	3.89295e-28	2.95907e-27
213081	Wdr19	-1.07722	5.03247	120.932	3.95421e-28	3.00415e-27
13841	Epha7	-2.97144	2.16809	120.894	4.03051e-28	3.06061e-27
13497	Drp2	-1.96986	2.88789	120.752	4.32968e-28	3.28617e-27
14199	Fhl1	1.14158	6.7561	120.621	4.62602e-28	3.50936e-27
72181	Nsun4	-1.13444	5.10964	120.546	4.80491e-28	3.64327e-27
225020	Fez2	0.966397	5.83645	120.517	4.87365e-28	3.69358e-27
20787	Srebf1	-1.17495	6.27971	120.417	5.12564e-28	3.88264e-27
20972	Syngr1	3.93614	1.11594	120.414	5.13575e-28	3.88839e-27
14254	Flt1	3.32782	1.86193	120.346	5.31233e-28	4.02011e-27
225028	Map4k3	-0.972694	8.23419	120.319	5.3876e-28	4.07507e-27
73689	Bloc1s2	1.28207	4.40817	119.997	6.33496e-28	4.78928e-27
78286	Nav2	1.13848	5.82237	119.86	6.78862e-28	5.12973e-27
270118	Maml2	-0.93752	5.90931	119.845	6.83919e-28	5.16541e-27
20148	Dhrs3	1.07642	8.25446	119.804	6.98231e-28	5.27093e-27
216350	Tspan8	2.68141	2.8619	119.648	7.55317e-28	5.69908e-27
12048	Bcl2l1	1.47803	6.32692	119.636	7.60016e-28	5.73172e-27
66960	Mindy3	0.990771	5.8427	119.477	8.23468e-28	6.20722e-27
16173	Il18	-3.71382	1.60217	119.376	8.66654e-28	6.52956e-27
27279	Tnfrsf12a	1.75701	6.35194	119.19	9.51805e-28	7.1676e-27
232664	Ccdc136	-1.6698	3.42559	119.029	1.03198e-27	7.76756e-27
29815	Bcar3	-3.12766	1.84317	118.787	1.16585e-27	8.77093e-27
17685	Msh2	-1.27845	4.37289	118.773	1.17443e-27	8.83113e-27
243548	Prickle2	1.44423	5.23942	118.705	1.21526e-27	9.13372e-27
56431	Dstn	1.05756	8.95864	118.684	1.22806e-27	9.22543e-27
214058	Megf11	3.34458	1.91039	118.633	1.26032e-27	9.46316e-27
98396	Slc41a1	-1.13645	6.1376	118.628	1.26364e-27	9.48343e-27
14783	Grb10	-0.952656	8.50575	118.614	1.27243e-27	9.54479e-27
320560	Dennd5b	1.42039	3.94264	118.595	1.28435e-27	9.62953e-27
17475	Mpdz	-0.872453	6.36783	118.566	1.30339e-27	9.76753e-27
237542	Osbpl8	0.971134	6.36572	118.544	1.31812e-27	9.87312e-27
140859	Nek8	-1.72327	3.6526	118.531	1.32642e-27	9.93044e-27
71446	Get1	1.20812	4.76634	118.514	1.33785e-27	1.00111e-26
12390	Cav2	-1.1038	5.26251	118.441	1.38788e-27	1.03805e-26
19206	Ptch1	1.17069	5.22381	118.392	1.42323e-27	1.06397e-26
18230	Nxn	1.09521	6.82605	118.375	1.43522e-27	1.07241e-26
11735	Ank3	-0.997676	5.73678	118.077	1.66782e-27	1.24562e-26
67063	Pgap4	-2.43841	2.11822	118.076	1.66874e-27	1.2457e-26
16012	Igfbp6	1.72048	4.7805	118.055	1.68657e-27	1.2584e-26
110876	Scn2a	-2.33824	2.93246	117.914	1.81112e-27	1.35067e-26
17968	Ncam2	-6.79481	1.93147	117.864	1.85678e-27	1.38405e-26
20751	Spr	1.2228	6.26126	117.806	1.91233e-27	1.42478e-26
12833	Col6a1	-1.1052	9.91813	117.754	1.9628e-27	1.46167e-26
80981	Arl4d	2.79143	1.95657	117.654	2.06453e-27	1.53668e-26
21961	Tns1	-1.77044	7.83504	117.607	2.11402e-27	1.57276e-26
282663	Serpinb1b	6.20607	0.774343	117.561	2.16309e-27	1.60849e-26
98314	D2hgdh	-1.51705	4.03459	117.543	2.18273e-27	1.62232e-26
100273	Osbpl9	-1.10358	7.11118	117.265	2.51197e-27	1.86612e-26
235587	Parp3	-0.863843	6.52697	117.184	2.61572e-27	1.94226e-26
59058	Bhlhe22	1.93994	2.91878	117.043	2.80941e-27	2.08507e-26
338362	Ust	-1.1407	4.67444	117.036	2.81939e-27	2.09148e-26
227622	Paxx	-1.79154	3.79079	117.015	2.84886e-27	2.11232e-26
73162	Otud3	1.45144	4.24105	116.965	2.92114e-27	2.16488e-26
18626	Per1	-1.46079	4.88461	116.954	2.93755e-27	2.17599e-26
13807	Eno2	1.46818	4.9777	116.921	2.98689e-27	2.21147e-26
381126	Garem1	1.20805	4.64511	116.791	3.1905e-27	2.36109e-26
319974	Auts2	-1.14585	5.31994	116.603	3.50637e-27	2.5936e-26
77045	Bcl7a	1.26611	4.73958	116.601	3.51056e-27	2.59545e-26
[truncated: 13,416 more rows]

## Sheet: 7c_20m
Entrez ID	Gene_symbol	logFC	logCPM	LR	P.Value	FDR
22414	Wnt2b	7.7984	7.93949	1221.98	1.0182e-267	1.56956e-263
18619	Penk	-7.997	8.91817	970.687	4.22541e-213	3.25674e-209
545055	Cma2	11.8795	7.54154	840.604	8.0239e-185	4.12295e-181
18811	Prl2c2	10.3495	7.96682	836.536	6.14891e-184	2.36964e-180
100689	Spon2	6.06044	8.06887	828.449	3.5234e-182	1.08626e-178
244954	Prss35	7.16202	8.10612	822.064	8.61254e-181	2.21271e-177
66889	Rnf128	6.80108	6.45833	803.284	1.04235e-176	2.2954e-173
207683	Igsf11	11.82	5.88462	795.362	5.50247e-175	1.06026e-171
213945	Col28a1	-6.46817	6.11281	729.645	1.07007e-160	1.83279e-157
12268	C4b	-8.0941	9.20525	675.785	5.51537e-149	8.50194e-146
17232	Mcpt9	11.8227	5.98385	667.645	3.24929e-147	4.55344e-144
16840	Cnmd	-11.4677	6.60625	637.518	1.15825e-140	1.48787e-137
13371	Dio2	5.37228	7.92733	606.039	8.13434e-134	9.64545e-131
56338	Txnip	-5.56878	7.59826	604.705	1.58611e-133	1.74642e-130
225288	Fhod3	6.10335	7.00567	583.269	7.2932e-129	7.49498e-126
22153	Tubb4a	9.26673	5.83006	558.112	2.16394e-123	2.08482e-120
15439	Hp	-8.02753	5.61538	554.113	1.60397e-122	1.45442e-119
78892	Crispld2	5.14294	8.65002	534.192	3.45857e-118	2.96188e-115
78896	Ecrg4	-7.3923	7.5867	531.125	1.60791e-117	1.30452e-114
68792	Srpx2	-5.29546	6.54328	521.884	1.64694e-115	1.26938e-112
116903	Calcb	13.3027	4.18753	519.665	5.00515e-115	3.67402e-112
117167	Steap4	-7.0919	6.36905	518.983	7.04449e-115	4.93595e-112
232409	Clec2e	8.66738	4.26127	516.848	2.05231e-114	1.37549e-111
326623	Tnfsf15	9.86734	5.04403	504.616	9.41177e-112	6.0451e-109
12164	Bmp8b	6.7799	4.46046	502.231	3.10799e-111	1.91638e-108
320982	Arl4c	4.77135	8.30137	498.292	2.23693e-110	1.32624e-107
17392	Mmp3	4.80059	7.51446	495.957	7.20396e-110	4.11293e-107
70564	Prxl2a	4.71347	5.55093	493.933	1.98623e-109	1.09349e-106
76252	Atp6v0e2	6.83646	6.15422	489.804	1.57212e-108	8.35664e-106
215653	Rassf2	4.00693	6.51632	489.702	1.65484e-108	8.50313e-106
20307	Ccl8	8.45881	4.51073	483.738	3.28336e-107	1.63268e-104
21950	Tnfsf9	5.03067	6.76163	483.35	3.98855e-107	1.92136e-104
494504	Apcdd1	5.36813	5.80654	480.869	1.38257e-106	6.45829e-104
14585	Gfra1	-5.04544	6.65392	478.047	5.68426e-106	2.57714e-103
15483	Hsd11b1	4.43554	7.02978	469.955	3.27798e-104	1.44371e-101
12903	Crabp1	8.87484	9.48215	469.058	5.13746e-104	2.19983e-101
218772	Rarb	8.55827	6.75401	467.212	1.29566e-103	5.398e-101
68527	Ucma	-12.9879	3.87585	462.725	1.22742e-102	4.97912e-100
209378	Itih5	7.7981	9.65856	454.938	6.07404e-101	2.4008e-98
12870	Cp	-6.91066	7.96158	452.211	2.38246e-100	9.18141e-98
14205	Vegfd	-4.35526	7.15824	446.261	4.69823e-99	1.76642e-96
29820	Tnfrsf19	5.84337	5.34605	436.859	5.22375e-97	1.91724e-94
56264	Cpxm1	4.03825	9.91452	434.35	1.83742e-96	6.58694e-94
57764	Ntn4	4.0076	6.94271	433.597	2.67928e-96	9.3866e-94
213391	Rassf4	-4.72709	5.33114	432.804	3.98672e-96	1.36567e-93
12350	Car3	6.82194	6.63027	432.586	4.44747e-96	1.47829e-93
58801	Pmaip1	4.50068	5.99806	432.559	4.50727e-96	1.47829e-93
29863	Pde7b	4.81068	5.49284	430.604	1.20092e-95	3.8567e-93
108030	Lin7a	7.48223	4.01999	427.516	5.64203e-95	1.77494e-92
12424	Cck	12.9707	3.86208	426.062	1.16938e-94	3.60521e-92
12814	Col11a1	-4.40552	8.25057	425.935	1.24655e-94	3.76775e-92
106042	Prickle1	3.64441	7.07573	421.688	1.04713e-93	3.10415e-91
12654	Chil1	-8.06133	7.03223	420.767	1.66164e-93	4.83287e-91
21949	Tnfsf8	9.59754	4.22684	412.375	1.11462e-91	3.17354e-89
12349	Car2	6.5725	4.61219	412.344	1.1323e-91	3.17354e-89
13030	Ctsb	3.47342	11.9408	412.26	1.18055e-91	3.24966e-89
27226	Pla2g7	9.48937	8.23122	407.192	1.49736e-90	4.04945e-88
72293	Nkd2	4.87127	7.96455	402.826	1.33597e-89	3.55069e-87
11815	Apod	-8.4755	7.06857	401.386	2.74916e-89	7.18275e-87
21824	Thbd	3.32842	9.52665	398.894	9.58602e-89	2.46281e-86
239405	Rspo2	-12.6194	3.49643	395.147	6.27109e-88	1.58473e-85
20682	Sox9	-5.03651	7.09502	394.974	6.84119e-88	1.70092e-85
13345	Twist2	4.08219	5.16131	392.522	2.33786e-87	5.72032e-85
232174	Cyp26b1	4.08161	9.97752	385.013	1.00842e-85	2.42888e-83
14573	Gdnf	4.89122	4.7696	378.087	3.24644e-84	7.69906e-82
70370	Fbln7	5.09572	6.08821	377.56	4.22889e-84	9.87702e-82
22417	Wnt4	4.28629	7.95631	376.187	8.41475e-84	1.93602e-81
16009	Igfbp3	4.72796	9.24237	373.997	2.52373e-83	5.72106e-81
21826	Thbs2	4.17392	11.294	372.729	4.76419e-83	1.06435e-80
11541	Adora2b	5.12328	5.21728	372.003	6.85501e-83	1.50957e-80
20897	Stra6	11.2989	7.71326	371.601	8.3857e-83	1.82064e-80
20750	Spp1	-4.48596	10.4585	371.195	1.02821e-82	2.18675e-80
16323	Inhba	3.69776	7.18609	371.18	1.03557e-82	2.18675e-80
66259	Camk2n1	4.41986	7.66929	369.842	2.0261e-82	4.22059e-80
23893	Grem2	4.85692	8.34639	362.532	7.91039e-81	1.62585e-78
382111	Susd5	-5.87704	4.82262	362.451	8.24004e-81	1.67132e-78
30923	Foxe3	12.5406	3.43074	357.293	1.0941e-79	2.19033e-77
399603	Lratd2	5.11505	4.27136	356.18	1.91127e-79	3.7772e-77
20710	Serpinb9e	10.2837	3.56079	356.049	2.04155e-79	3.9836e-77
85031	Pla1a	4.81868	6.76562	356.016	2.07568e-79	3.99957e-77
64074	Smoc2	-5.02142	7.43759	353.331	7.97627e-79	1.51795e-76
14190	Fgl2	5.65218	7.26735	352.581	1.16196e-78	2.18435e-76
20256	Clec11a	-6.16566	6.19792	351.5	1.99707e-78	3.70901e-76
54712	Plxnc1	4.34648	5.31319	350.564	3.1939e-78	5.86118e-76
109700	Itga1	-3.57628	7.28213	350.157	3.91729e-78	7.10412e-76
74488	Lrrc15	5.97547	7.17048	349.441	5.60938e-78	1.00545e-75
212073	Syne3	-4.62665	4.76066	347.163	1.75778e-77	3.1145e-75
14264	Fmod	-3.59372	7.9291	343.42	1.14828e-76	2.01145e-74
14119	Fbn2	-3.78243	8.3632	339.011	1.04775e-75	1.81473e-73
50706	Postn	-4.34806	11.0259	338.215	1.5614e-75	2.67433e-73
80976	Syt13	3.42833	8.87493	337.766	1.95615e-75	3.31363e-73
16526	Kcnk2	-3.76871	5.21515	331.043	5.69538e-74	9.54286e-72
53614	Reck	-3.07336	7.72173	330.545	7.31258e-74	1.21208e-71
12457	Noct	3.0658	7.16696	330.481	7.54988e-74	1.2381e-71
116847	Prelp	-4.46022	8.64649	328.337	2.21267e-73	3.59035e-71
18984	Por	3.49208	8.34686	326.057	6.94339e-73	1.11492e-70
56405	Dusp14	4.22315	5.47857	323.585	2.39916e-72	3.81269e-70
208777	Sned1	-4.03442	9.10247	322.294	4.58453e-72	7.21129e-70
68178	Cgnl1	3.35493	8.65062	321.865	5.6841e-72	8.85054e-70
20315	Cxcl12	-3.81267	10.3649	320.685	1.02727e-71	1.58353e-69
12266	C3	-7.60024	10.3986	319.493	1.86792e-71	2.85089e-69
16447	Ivl	8.70161	3.49661	316.381	8.89671e-71	1.34454e-68
94227	Pi15	-5.43566	7.21996	315.445	1.42288e-70	2.12949e-68
71721	Fam13c	-3.69892	5.90736	312.71	5.60989e-70	8.31504e-68
12111	Bgn	-3.05693	11.868	311.276	1.15126e-69	1.69016e-67
15476	Hs3st1	5.09927	6.33985	310.017	2.16548e-69	3.14914e-67
76566	Rflnb	-3.73183	6.19791	309.495	2.81399e-69	4.05398e-67
20203	S100b	3.22708	5.49326	309.134	3.37275e-69	4.81398e-67
60440	Iigp1	-5.99407	3.91674	309.03	3.55202e-69	5.02335e-67
12006	Axin2	3.461	6.06172	307.807	6.56239e-69	9.1963e-67
320910	Itgb8	-4.71291	4.19606	307.723	6.84466e-69	9.50545e-67
72565	Uaca	3.25388	8.00343	306.775	1.10114e-68	1.51555e-66
20616	Snap91	5.57933	3.84175	304.478	3.48481e-68	4.75383e-66
53412	Ppp1r3c	-5.68822	6.15674	304.29	3.82935e-68	5.17801e-66
330222	Sdk1	4.73863	5.60693	304.162	4.08322e-68	5.47329e-66
13482	Dpp4	9.21872	6.25963	303.247	6.46147e-68	8.58651e-66
15957	Ifit1	-4.14089	4.67277	303.127	6.86204e-68	9.04088e-66
21808	Tgfb2	4.81201	9.17984	302.732	8.36706e-68	1.09304e-65
74645	Tent5c	3.35283	5.54424	301.966	1.22857e-67	1.59147e-65
93960	Nkd1	3.15959	6.20574	301.413	1.62147e-67	2.08291e-65
225998	Rorb	6.41038	3.37603	300.756	2.25443e-67	2.87207e-65
229949	Ak5	-4.22603	5.5323	298.849	5.86822e-67	7.41464e-65
228662	Btbd3	-2.90216	6.85367	296.99	1.49158e-66	1.86932e-64
22413	Wnt2	9.58101	3.60582	294.775	4.53014e-66	5.63163e-64
22160	Twist1	3.36736	9.19133	290.86	3.23048e-65	3.98382e-63
14560	Gdf10	5.55977	3.71919	290.333	4.20636e-65	5.14611e-63
230103	Npr2	-3.01177	7.06537	289.585	6.1225e-65	7.43137e-63
232975	Atp1a3	6.40179	3.88955	288.104	1.28759e-64	1.55064e-62
17988	Ndrg1	-3.48969	6.63292	287.785	1.51102e-64	1.80561e-62
214642	Cped1	-3.68544	5.0148	286.208	3.33271e-64	3.95183e-62
246316	Lgi2	3.52757	6.73012	285.355	5.11336e-64	6.01698e-62
56213	Htra1	3.55435	10.9129	284.059	9.79772e-64	1.14418e-61
20713	Serpini1	5.80444	5.18444	282.412	2.23881e-63	2.59483e-61
73998	Herc3	3.68672	5.33539	281.727	3.15729e-63	3.63207e-61
14402	Gabrb3	8.1754	3.55265	281.666	3.25533e-63	3.7171e-61
246707	Emilin2	3.15976	7.69086	280.514	5.80169e-63	6.57596e-61
217410	Trib2	-2.81387	6.54428	280.177	6.87268e-63	7.73302e-61
16956	Lpl	-3.9247	7.34523	279.082	1.19015e-62	1.32944e-60
654812	Angptl7	6.06845	7.83163	276.33	4.7363e-62	5.25253e-60
69908	Rab3b	4.59089	3.64839	275.938	5.76406e-62	6.34664e-60
15364	Hmga2	2.76013	6.75153	275.774	6.26055e-62	6.84443e-60
66894	Wwp2	-2.93853	6.86588	275.724	6.41855e-62	6.96775e-60
13885	Esd	2.78159	9.21041	275.597	6.84111e-62	7.32747e-60
58250	Chst11	3.01772	7.65284	275.596	6.845e-62	7.32747e-60
225207	Zfp521	-3.20401	6.91309	275.431	7.4349e-62	7.90407e-60
17313	Mgp	-7.47556	8.21213	275.116	8.70985e-62	9.19605e-60
57349	Ppbp	4.9511	3.30947	274.059	1.48006e-61	1.55205e-59
216795	Wnt9a	3.84358	4.77575	273.491	1.96854e-61	2.05034e-59
105349	Akr1c18	8.4347	4.78094	273.112	2.38029e-61	2.46257e-59
216227	Slc17a8	10.3418	2.87135	272.45	3.31803e-61	3.40983e-59
22061	Trp63	-5.55604	3.98878	271.579	5.13669e-61	5.24385e-59
17880	Myh11	4.87665	6.03624	270.655	8.16912e-61	8.28467e-59
380912	Zfp395	-3.52443	5.52613	269.356	1.56758e-60	1.57937e-58
320924	Ccbe1	3.25904	7.91671	268.513	2.39354e-60	2.39587e-58
14799	Gria1	5.92377	6.7564	268.326	2.62942e-60	2.615e-58
71795	Pitpnc1	3.34952	6.67315	265.792	9.37541e-60	9.26423e-58
66695	Aspn	-6.79036	8.19145	264.297	1.9854e-59	1.94936e-57
11754	Aoc3	-5.78441	5.87273	264.118	2.17226e-59	2.11933e-57
64058	Perp	4.45771	5.59434	264.025	2.27658e-59	2.20714e-57
270097	Vat1l	7.52555	5.65532	263.277	3.31289e-59	3.19177e-57
20311	Cxcl5	-3.37046	6.96144	262.644	4.55203e-59	4.35836e-57
58188	Vstm2b	9.67234	2.91672	260.408	1.39794e-58	1.3302e-56
65112	Pmepa1	3.16809	8.50518	259.472	2.23638e-58	2.11496e-56
14268	Fn1	-2.66283	14.1872	259.383	2.33846e-58	2.19801e-56
15551	Htr1b	4.09967	3.92378	257.973	4.74545e-58	4.4334e-56
110751	Adam33	3.37828	4.71058	257.05	7.54379e-58	7.00527e-56
50493	Txnrd1	3.1482	8.92604	254.729	2.41788e-57	2.23183e-55
12583	Cdo1	3.3323	5.76309	253.197	5.2165e-57	4.78645e-55
50909	C1ra	-2.91946	6.84168	250.926	1.6315e-56	1.48814e-54
22381	Tceal9	2.84166	8.67291	250.019	2.57176e-56	2.33198e-54
24059	Slco2a1	2.76112	6.7266	247.35	9.82159e-56	8.85379e-54
320452	P4ha3	-3.17507	5.64325	246.702	1.35942e-55	1.21834e-53
20249	Scd1	3.28739	8.32028	246.579	1.4465e-55	1.28889e-53
83453	Chrdl1	-5.54019	3.23298	245.977	1.9567e-55	1.73348e-53
11496	Adam22	3.64972	4.03103	245.936	1.99702e-55	1.75909e-53
12338	Capn6	-3.27483	5.55597	243.211	7.84431e-55	6.87045e-53
381511	Pdp1	-2.94959	6.45863	241.866	1.54131e-54	1.34233e-52
15234	Hgf	-4.47804	4.53334	241.737	1.64404e-54	1.42376e-52
19716	Bex1	5.82598	6.73443	241.663	1.7069e-54	1.46993e-52
93695	Gpnmb	4.13309	7.68638	241.264	2.08488e-54	1.78547e-52
12310	Calca	9.58823	2.87492	241.118	2.24364e-54	1.91081e-52
232313	Gxylt2	2.71714	7.22692	238.306	9.20448e-54	7.79599e-52
244237	Tnfrsf26	3.0554	5.24605	237.161	1.63584e-53	1.37795e-51
12389	Cav1	-3.04377	7.56265	235.99	2.94551e-53	2.46767e-51
18552	Pcsk5	-3.10642	6.20996	234.692	5.65144e-53	4.70902e-51
330812	Rnf150	-3.5214	5.25287	234.234	7.11059e-53	5.89299e-51
19200	Pstpip1	4.07015	4.50061	233.664	9.46705e-53	7.80399e-51
54156	Egfl6	-6.77301	4.06125	232.303	1.87566e-52	1.53794e-50
16510	Kcnh1	6.57618	3.02864	231.969	2.21778e-52	1.80884e-50
64292	Ptges	3.13453	7.45148	231.872	2.32811e-52	1.88884e-50
73379	Dcbld2	2.49484	7.72206	231.306	3.09338e-52	2.49657e-50
233744	Spon1	4.19944	3.84684	230.423	4.82026e-52	3.87002e-50
22436	Xdh	2.57751	8.58061	230.077	5.73544e-52	4.58092e-50
66425	Pcp4l1	-9.34712	5.17619	228.4	1.33138e-51	1.0579e-49
23892	Grem1	4.54302	8.07801	227.62	1.96929e-51	1.55675e-49
50908	C1s1	-2.56357	7.72173	227.537	2.05366e-51	1.61516e-49
19252	Dusp1	2.67336	7.11566	227.308	2.30319e-51	1.80222e-49
27062	Cadps	6.60748	4.11153	225.565	5.52859e-51	4.3042e-49
242109	Zfp697	3.22092	5.20179	224.478	9.5407e-51	7.39045e-49
245857	Ssh3	-4.11122	4.35077	223.708	1.40487e-50	1.0828e-48
231162	Cytl1	-11.5395	2.43225	223.671	1.43129e-50	1.09768e-48
24014	Rnasel	-3.14095	4.71536	223.654	1.44372e-50	1.10173e-48
14370	Fzd8	-2.72814	6.29194	223.216	1.79895e-50	1.36605e-48
210297	Lrch2	3.42118	6.75607	222.868	2.14224e-50	1.61876e-48
227325	Dner	5.95968	3.96647	222.058	3.21753e-50	2.41943e-48
16948	Lox	-3.40729	10.4745	220.579	6.76107e-50	5.04497e-48
653016	Mymx	-5.31774	3.32541	220.575	6.77462e-50	5.04497e-48
22360	Nrsn1	11.5417	2.44382	220.183	8.24836e-50	6.1129e-48
15558	Htr2a	4.7038	5.75467	218.705	1.73355e-49	1.27859e-47
223272	Itgbl1	-2.76499	5.64313	218.28	2.1452e-49	1.57468e-47
24132	Zfp53	3.32368	5.80107	218.198	2.23573e-49	1.63335e-47
12836	Col7a1	4.45603	7.34307	218.119	2.32695e-49	1.69197e-47
23886	Gdf15	5.27419	3.08075	217.995	2.47592e-49	1.79184e-47
56471	Stmn4	7.32971	2.78515	217.832	2.68688e-49	1.93543e-47
64817	Svep1	-2.60534	9.86458	217.733	2.82481e-49	2.02532e-47
214791	Sertad4	-4.27749	5.34686	217.439	3.27334e-49	2.33604e-47
218461	Pde8b	4.24586	5.98759	217.231	3.63383e-49	2.58136e-47
20706	Serpinb9b	3.67145	4.36187	216.568	5.07062e-49	3.58549e-47
234214	Sorbs2	-4.82008	6.37338	215.863	7.22607e-49	5.0863e-47
97998	Deptor	-3.15489	4.61229	215.816	7.39707e-49	5.183e-47
14089	Fap	5.858	7.13693	214.669	1.31592e-48	9.17869e-47
18628	Per3	-2.7291	5.04875	214.273	1.60564e-48	1.11491e-46
236920	Stard8	-4.75088	4.99978	214.165	1.69506e-48	1.17172e-46
16878	Lif	4.65537	4.99806	213.942	1.89576e-48	1.30461e-46
17231	Mcpt8	4.12274	4.07458	213.893	1.94362e-48	1.3316e-46
171508	Creld1	3.85375	8.10901	212.401	4.11281e-48	2.80526e-46
333182	Cox6b2	3.32866	4.21415	212.239	4.45997e-48	3.02866e-46
11830	Aqp5	3.76946	4.98034	212.162	4.63672e-48	3.13487e-46
208213	Tmem132c	8.79126	4.55243	211.394	6.8183e-48	4.5897e-46
216198	Tcp11l2	-2.79801	4.98892	210.067	1.32844e-47	8.90344e-46
12035	Bcat1	2.75246	6.05201	209.456	1.80558e-47	1.20489e-45
20198	S100a4	-3.94286	7.08285	209.014	2.25468e-47	1.4981e-45
56741	Igdcc4	-3.35017	4.91131	208.925	2.35666e-47	1.55914e-45
319504	Nrcam	4.82804	4.68626	208.819	2.48635e-47	1.63791e-45
94185	Tnfrsf21	3.71507	5.05122	206.927	6.43214e-47	4.21921e-45
20512	Slc1a3	-3.9485	4.26943	206.661	7.34974e-47	4.80069e-45
66054	Cndp2	2.60898	6.67303	206.441	8.212e-47	5.34127e-45
24063	Spry1	2.86804	6.86572	203.652	3.33395e-46	2.15936e-44
14373	G0s2	-3.42443	4.41141	203.539	3.52769e-46	2.27528e-44
21923	Tnc	2.62057	11.1512	203.395	3.79228e-46	2.43575e-44
19242	Ptn	-5.33685	5.71509	203.323	3.93263e-46	2.51541e-44
226090	Ermp1	2.36572	7.09973	202.678	5.43853e-46	3.46425e-44
21838	Thy1	2.83884	9.79182	201.903	8.02679e-46	5.09189e-44
71685	Galnt14	5.97241	3.34811	201.749	8.67371e-46	5.47972e-44
57319	Smpdl3a	-2.60487	5.08735	201.662	9.06114e-46	5.70112e-44
70549	Tln2	-2.26717	7.36921	201.252	1.11315e-45	6.9753e-44
432530	Adcy1	3.31277	7.37513	200.17	1.91714e-45	1.19647e-43
12014	Bach2	3.41641	4.0321	199.867	2.23266e-45	1.38776e-43
108760	Galnt16	3.05828	5.66482	199.777	2.3361e-45	1.44622e-43
56349	Net1	2.69352	7.62163	198.4	4.66725e-45	2.87783e-43
20855	Stc1	3.81278	7.74084	198.2	5.15909e-45	3.16842e-43
18481	Pak3	-2.56069	5.8652	198.132	5.33893e-45	3.26586e-43
11468	Actg2	3.32338	6.32115	197.76	6.43709e-45	3.92204e-43
23962	Oasl2	-5.01651	3.96537	197.665	6.74975e-45	4.09636e-43
16401	Itga4	3.47842	5.20581	197.441	7.55586e-45	4.56759e-43
16011	Igfbp5	-2.70107	11.2208	197.18	8.61404e-45	5.18693e-43
74153	Uba7	-3.97885	3.4929	197.043	9.22896e-45	5.53558e-43
57257	Vav3	3.93308	4.29887	196.649	1.12517e-44	6.72269e-43
13608	Edar	-11.2817	2.16975	195.852	1.6787e-44	9.9912e-43
16658	Mafb	2.35054	7.29221	195.413	2.09328e-44	1.24108e-42
79201	Tnfrsf23	2.85265	6.48236	195.092	2.46036e-44	1.45312e-42
17183	Matn4	-10.6709	7.32818	193.047	6.87546e-44	4.04524e-42
20112	Rps6ka2	2.49739	5.76064	192.219	1.0423e-43	6.10917e-42
18569	Pdcd4	-2.67716	5.0788	191.339	1.62199e-43	9.47082e-42
105853	Mal2	7.75625	2.68779	191.164	1.77099e-43	1.03018e-41
228770	Rspo4	8.80782	2.76696	190.976	1.94633e-43	1.12792e-41
18163	Ctnnd2	8.00862	5.03625	190.157	2.93871e-43	1.69664e-41
224093	Fam43a	-3.40874	6.78738	189.518	4.05081e-43	2.32997e-41
70025	Acot7	2.31854	6.75204	189.313	4.49072e-43	2.5734e-41
55932	Gbp3	-4.37466	3.65714	189.1	4.99882e-43	2.85396e-41
20708	Serpinb6b	2.53892	5.71108	188.676	6.18454e-43	3.51788e-41
109042	Cavin3	-2.78923	6.28713	188.626	6.34091e-43	3.59357e-41
12258	Serping1	-2.95502	7.7492	188.285	7.52651e-43	4.24986e-41
13479	Dpep1	2.79818	7.41579	186.076	2.28552e-42	1.28581e-40
327959	Xaf1	-2.96731	4.03078	185.914	2.47948e-42	1.38986e-40
13082	Cyp26a1	10.0871	5.14682	185.254	3.45418e-42	1.92921e-40
20312	Cx3cl1	-3.60174	5.349	184.928	4.06888e-42	2.26432e-40
73173	Pcdh18	-2.38385	5.86424	184.467	5.12926e-42	2.84416e-40
230971	Megf6	-5.22122	5.55207	184.281	5.63404e-42	3.11286e-40
14367	Fzd5	-2.56953	5.59461	184.194	5.88549e-42	3.24017e-40
215690	Nav1	2.29332	6.79424	183.685	7.59968e-42	4.16901e-40
216565	Ehbp1	-2.24426	6.77911	182.003	1.77042e-41	9.67767e-40
171580	Mical1	-3.21211	3.7427	180.919	3.0528e-41	1.66286e-39
69274	Ctdspl	-2.42407	5.46018	180.431	3.90136e-41	2.11759e-39
269959	Adamtsl3	-9.03614	5.67116	180.088	4.63756e-41	2.50835e-39
76901	Jade2	-4.02528	4.85324	179.819	5.30768e-41	2.86076e-39
63953	Dusp10	2.88192	5.06078	178.552	1.0035e-40	5.38987e-39
110095	Pygl	-2.51032	5.79183	177.813	1.45513e-40	7.78846e-39
330267	Thsd7a	-2.28635	5.88468	177.57	1.64469e-40	8.77264e-39
11492	Adam19	2.51926	7.73636	177.477	1.72335e-40	9.16052e-39
66412	Arrdc4	2.33348	7.11209	177.446	1.75007e-40	9.27054e-39
16764	Aff3	-2.53494	5.9324	177.125	2.05666e-40	1.08574e-38
50490	Nox4	-3.5616	3.7304	176.805	2.41583e-40	1.27099e-38
74574	Lvrn	2.94811	4.14478	176.7	2.54644e-40	1.33515e-38
14675	Gna14	2.55591	5.01955	176.407	2.95113e-40	1.54209e-38
547253	Parp14	-3.24278	4.12751	175.892	3.82384e-40	1.99137e-38
80797	Clca3a2	5.33265	2.43781	175.814	3.97554e-40	2.0634e-38
14396	Gabra3	7.75881	2.70184	175.661	4.29346e-40	2.22093e-38
320024	Nceh1	2.89887	6.27278	175.303	5.14172e-40	2.65082e-38
110596	Arhgef28	-3.227	4.43436	175.011	5.95465e-40	3.0597e-38
66540	Fam107b	2.4268	7.07854	174.786	6.66759e-40	3.41465e-38
20356	Sema5a	2.58957	7.05768	174.348	8.31162e-40	4.24251e-38
70021	Nt5dc2	2.25704	6.18077	174.18	9.04084e-40	4.59949e-38
100504464	E230016K23Rik	-8.16418	2.64617	173.87	1.05685e-39	5.359e-38
83675	Bicc1	-2.42159	8.70284	172.919	1.7049e-39	8.61675e-38
241327	Olfml2a	-7.01952	3.24408	172.804	1.80639e-39	9.09982e-38
16476	Jun	2.1757	7.29932	172.711	1.89299e-39	9.50503e-38
14658	Glrb	3.8028	5.08773	171.787	3.01159e-39	1.50726e-37
235106	Ntm	11.0746	1.98525	171.658	3.21431e-39	1.60351e-37
97165	Hmgb2	-2.46291	4.96082	171.615	3.28422e-39	1.63311e-37
214305	Hhipl1	2.9924	5.34982	171.453	3.56269e-39	1.76588e-37
26561	Mmp23	-3.06198	5.50908	170.886	4.73974e-39	2.34177e-37
231440	Parm1	3.67061	5.63662	170.764	5.03757e-39	2.48096e-37
19734	Rgs16	2.55574	6.39379	169.678	8.69818e-39	4.27014e-37
100115376	Trdj1	11.0683	1.96944	169.555	9.25436e-39	4.52876e-37
229488	Fhip1a	-3.07723	3.57625	169.547	9.29171e-39	4.53265e-37
14062	F2r	2.6863	9.34998	169.506	9.48362e-39	4.61167e-37
279653	Pcdh19	-2.12659	6.27606	169.413	9.94141e-39	4.81908e-37
209588	Sectm1a	-5.24139	2.51785	169.316	1.04376e-38	5.04376e-37
67557	Larp6	2.96132	5.21978	168.961	1.24756e-38	6.00975e-37
224756	H2-M1	11.0972	2.01693	168.088	1.93499e-38	9.29217e-37
20408	Sh3gl3	4.43679	3.63152	167.943	2.08206e-38	9.96738e-37
12484	Cd24a	2.08808	6.58576	167.368	2.78015e-38	1.32681e-36
100040462	Mndal	-2.99299	4.2564	166.413	4.49391e-38	2.13807e-36
67220	Plekho1	2.59065	5.95284	166.405	4.51226e-38	2.1402e-36
19039	Lgals3bp	-3.29588	7.47167	166.183	5.04427e-38	2.3852e-36
13609	S1pr1	2.4395	6.15896	165.556	6.91534e-38	3.25994e-36
19668	Rbpjl	-8.44357	2.10936	165.274	7.97028e-38	3.74579e-36
21817	Tgm2	3.50398	8.47187	165.1	8.70011e-38	4.07636e-36
12326	Camk4	-3.41439	6.36218	165.09	8.74488e-38	4.08492e-36
242050	Igsf10	-4.06085	5.67038	164.665	1.0825e-37	5.04131e-36
19348	Kif20a	-2.90064	4.13199	163.701	1.75783e-37	8.16172e-36
11732	Ank	-2.15691	6.23814	163.4	2.04533e-37	9.46811e-36
67458	Ergic1	2.0763	8.56877	162.839	2.71312e-37	1.25218e-35
66972	Slc25a23	3.46656	6.16157	162.581	3.0887e-37	1.42126e-35
105727	Slc38a1	2.85471	5.05453	162.29	3.57528e-37	1.63758e-35
11548	Adra1b	5.38237	4.82403	162.287	3.58005e-37	1.63758e-35
22068	Trpc6	10.9987	1.90462	161.316	5.83602e-37	2.66161e-35
15437	Hoxd8	2.52164	4.78495	161.206	6.16722e-37	2.80436e-35
242316	Gdf6	3.99716	5.57966	160.694	7.98221e-37	3.619e-35
241556	Tspan18	2.7692	4.33845	159.561	1.41081e-36	6.37762e-35
13052	Cxadr	2.90974	6.0535	159.545	1.42256e-36	6.4119e-35
63959	Slc29a1	-4.37504	4.9543	159.308	1.60262e-36	7.20242e-35
217732	Cipc	2.08235	5.9736	158.466	2.44775e-36	1.09686e-34
13131	Dab1	10.9319	1.83903	158.013	3.07445e-36	1.3737e-34
245945	Rbm47	3.97509	2.99807	157.468	4.04402e-36	1.80169e-34
320508	Cachd1	2.35291	5.82903	156.955	5.23667e-36	2.32632e-34
320712	Abi3bp	-3.44295	9.48353	156.917	5.33694e-36	2.36405e-34
80861	Dhx58	-3.75831	3.0391	156.901	5.3806e-36	2.37656e-34
13730	Emp1	-2.26889	7.94873	156.751	5.80079e-36	2.55483e-34
21987	Tpd52l1	3.25312	3.61585	156.261	7.42516e-36	3.26094e-34
192166	Sardh	-2.91099	4.96355	156.235	7.52175e-36	3.29397e-34
229699	Slc16a4	-4.87484	3.57865	155.923	8.80031e-36	3.84297e-34
80888	Hspb8	2.96661	8.8799	155.573	1.04972e-35	4.57101e-34
78255	Ralgps2	3.69566	5.13862	155.367	1.16419e-35	5.0552e-34
403395	Clec3a	-10.8735	1.76925	155.083	1.34299e-35	5.81524e-34
16324	Inhbb	3.12349	9.21687	154.72	1.61236e-35	6.96204e-34
219132	Phf11d	-5.27405	3.59785	154.497	1.80381e-35	7.76695e-34
74760	Rab3il1	-3.2697	3.80132	154.326	1.9657e-35	8.44045e-34
54357	Epb41l4b	-5.64122	4.69875	153.953	2.37084e-35	1.01518e-33
12834	Col6a2	-2.16501	8.76018	153.612	2.81475e-35	1.20192e-33
230099	Car9	-6.4282	6.79235	153.604	2.82723e-35	1.20392e-33
12606	Cebpa	-3.37173	5.19733	153.587	2.8506e-35	1.21052e-33
56089	Ramp3	5.52372	4.57307	153.552	2.90143e-35	1.22872e-33
12818	Col14a1	-8.25211	5.9796	153.39	3.14878e-35	1.32982e-33
21401	Tcea3	-4.87227	3.01595	153.333	3.23996e-35	1.36459e-33
216233	Socs2	-2.12434	5.71652	152.773	4.29446e-35	1.80379e-33
214058	Megf11	4.29846	3.0496	152.716	4.41876e-35	1.85096e-33
26568	Slc27a3	-4.26146	4.01009	152.693	4.47169e-35	1.86805e-33
66902	Mtap	2.30331	7.89212	152.616	4.64765e-35	1.93631e-33
67468	Mmd	2.0403	6.79105	152.23	5.64236e-35	2.34439e-33
94109	Csmd1	-7.57084	3.96194	151.534	8.01126e-35	3.31972e-33
16997	Ltbp2	-3.51744	8.46285	150.905	1.09958e-34	4.54424e-33
672511	Rnf213	-1.96003	7.04145	150.398	1.41902e-34	5.8487e-33
27047	Omd	-6.21984	6.61522	150.324	1.47253e-34	6.05307e-33
20657	Sod3	-3.3667	6.90842	148.811	3.15411e-34	1.2931e-32
20608	Sstr4	4.81901	2.38335	148.727	3.29089e-34	1.3456e-32
382571	Kcnf1	4.67462	3.20607	148.656	3.40997e-34	1.3906e-32
219140	Spata13	2.52549	5.20088	148.449	3.78384e-34	1.539e-32
16195	Il6st	-2.60376	10.1497	148.439	3.80307e-34	1.54275e-32
77940	A930004D18Rik	-3.74025	3.13568	148.366	3.94624e-34	1.59662e-32
277854	Depdc5	3.58604	7.56462	148.134	4.43486e-34	1.78962e-32
231287	Atp10d	-3.2531	3.83687	147.981	4.79002e-34	1.92789e-32
68298	Ncapd2	-2.26958	5.24108	147.829	5.16934e-34	2.07514e-32
13830	Stom	1.94414	7.31919	147.49	6.13349e-34	2.45579e-32
21414	Tcf7	3.04466	4.04228	147.374	6.50192e-34	2.59656e-32
22253	Unc5c	-2.46882	4.95267	147.134	7.3373e-34	2.9226e-32
12955	Cryab	2.23767	8.19315	147.019	7.77253e-34	3.08798e-32
64075	Smoc1	-7.9635	6.05902	146.966	7.98495e-34	3.16422e-32
18654	Pgf	5.77282	4.35636	146.726	9.00619e-34	3.55975e-32
216724	Rufy1	2.19865	5.85965	146.478	1.02046e-33	4.02312e-32
16973	Lrp5	-1.96837	6.54439	146.424	1.0486e-33	4.12351e-32
93689	Lmod1	2.83976	6.43386	146.124	1.21964e-33	4.78392e-32
21356	Tapbp	-2.3251	6.38037	146.038	1.27336e-33	4.98195e-32
207565	Camkk2	-2.38034	5.85448	146.001	1.29754e-33	5.06369e-32
81907	Tmem108	4.20121	3.05037	145.903	1.36323e-33	5.3066e-32
433375	Creg1	2.40372	6.78161	145.42	1.73794e-33	6.74818e-32
237353	Sh3rf3	-3.42893	3.75581	145.311	1.83677e-33	7.11403e-32
20322	Sord	2.65463	5.26019	145.273	1.87166e-33	7.23098e-32
69354	Slc38a4	3.82018	4.82012	145.13	2.01192e-33	7.75343e-32
64406	Sp5	10.7986	1.71323	144.944	2.20873e-33	8.49068e-32
17161	Maoa	2.08122	7.27696	144.761	2.42253e-33	9.28937e-32
13123	Cyp7b1	2.87508	4.84218	144.711	2.48351e-33	9.49956e-32
76650	Srxn1	2.21794	6.43502	144.677	2.52691e-33	9.62446e-32
19228	Pth1r	-2.7637	5.12923	144.676	2.52865e-33	9.62446e-32
20358	Sema6a	2.87346	3.92384	144.558	2.68247e-33	1.01848e-31
74682	Wdr35	2.06266	6.92293	144.506	2.75377e-33	1.04298e-31
22418	Wnt5a	2.36355	8.08126	144.441	2.84619e-33	1.07534e-31
108735	Sft2d2	-2.08255	5.84529	144.268	3.10483e-33	1.17019e-31
100952	Emilin1	-3.41731	8.04051	143.894	3.74787e-33	1.40911e-31
58187	Cldn10	6.65571	2.92455	143.442	4.70421e-33	1.76436e-31
231549	Lrrc8d	3.22436	4.28121	143.309	5.0301e-33	1.88201e-31
12739	Cldn3	10.8272	1.74629	143.081	5.64418e-33	2.10666e-31
14590	Ggh	2.11628	6.45615	143.063	5.69353e-33	2.11995e-31
228598	Ebf4	3.18569	5.0307	142.948	6.03312e-33	2.24098e-31
107765	Ankrd1	2.78271	7.66613	142.548	7.38166e-33	2.7353e-31
11746	Anxa4	-2.59561	5.76443	141.414	1.30617e-32	4.82846e-31
210573	Tmem151b	3.99148	3.47578	141.188	1.46363e-32	5.39758e-31
320398	Lrig3	-2.27951	6.00338	140.778	1.799e-32	6.61852e-31
225724	Mapk4	5.20616	2.39314	140.739	1.83493e-32	6.73464e-31
109620	Dsp	4.64569	2.6365	140.537	2.03144e-32	7.43816e-31
216505	Pik3ip1	-3.99199	4.78381	140.424	2.15038e-32	7.855e-31
71911	Bdh1	3.5228	4.42878	140.416	2.15914e-32	7.86834e-31
83671	Sytl2	2.74792	5.8136	140.404	2.17224e-32	7.89744e-31
100503530	Gm11351	10.7224	1.63658	140.117	2.50927e-32	9.10126e-31
210274	Shank2	3.85944	3.8165	139.942	2.7414e-32	9.91989e-31
224090	Tmem44	-3.60972	4.07904	139.886	2.81883e-32	1.01762e-30
11602	Angpt4	3.73713	7.66927	138.782	4.91584e-32	1.77051e-30
16421	Itgb7	5.6788	3.91241	138.716	5.08174e-32	1.82599e-30
11717	Ampd3	2.42544	7.64718	138.494	5.68216e-32	2.03699e-30
67389	C1qtnf12	-3.13447	3.4301	138.069	7.03737e-32	2.51696e-30
209086	Samd9l	-2.92551	5.25767	137.444	9.64079e-32	3.44011e-30
56096	Plac1	6.89918	2.96619	137.106	1.14298e-31	4.06906e-30
14718	Got1	2.05331	5.7625	136.937	1.2445e-31	4.42026e-30
12824	Col2a1	-8.64737	7.47368	136.802	1.33247e-31	4.72184e-30
78244	Dnajc21	2.2026	6.00156	136.767	1.35601e-31	4.79422e-30
16598	Klf2	-3.42683	4.40739	136.594	1.47926e-31	5.21805e-30
12822	Col18a1	2.76698	6.96709	136.502	1.54983e-31	5.4545e-30
79202	Tnfrsf22	2.09489	5.01477	135.35	2.76839e-31	9.72088e-30
20446	St6galnac2	-3.68924	2.52153	135.242	2.92307e-31	1.02407e-29
16538	Kcns1	-10.6429	1.53866	135.14	3.07723e-31	1.07563e-29
70974	Pgm2l1	2.1314	5.10329	135.043	3.23023e-31	1.12656e-29
56791	Ube2l6	-2.6638	3.75424	134.726	3.79022e-31	1.31888e-29
237360	Adamts14	3.48049	5.05391	134.595	4.04785e-31	1.40535e-29
12306	Anxa2	-2.15374	8.49433	134.483	4.28456e-31	1.48419e-29
238276	Akap5	5.44866	4.46644	133.75	6.1952e-31	2.14123e-29
18033	Nfkb1	-1.86458	6.61991	133.691	6.38375e-31	2.20146e-29
11676	Aldoc	-4.54329	3.92537	133.682	6.41318e-31	2.20668e-29
99709	Clca4b	10.6674	1.58856	133.45	7.20897e-31	2.47497e-29
13992	Khdrbs3	2.66954	5.30374	133.324	7.6793e-31	2.63059e-29
108075	Ltbp4	-4.32701	5.56223	133.225	8.07419e-31	2.75973e-29
81004	Tbl1xr1	-2.29395	6.85262	133.06	8.77292e-31	2.99191e-29
12705	Cited1	8.96577	3.20649	132.739	1.03107e-30	3.50859e-29
56742	Psrc1	2.07993	5.72415	132.556	1.13055e-30	3.83863e-29
230125	Slc25a51	1.88823	7.93341	132.431	1.20419e-30	4.07967e-29
23984	Pde10a	2.57307	5.30934	132.186	1.36207e-30	4.60447e-29
70397	Tmem70	1.84558	6.35702	132.043	1.46399e-30	4.93817e-29
50766	Crim1	1.99568	8.73701	131.814	1.64275e-30	5.52903e-29
20679	Sox6	-3.77984	3.86021	131.755	1.69236e-30	5.68359e-29
16687	Krt6a	5.99234	1.92603	131.573	1.85489e-30	6.21589e-29
235534	Pxylp1	2.14456	6.06475	131.37	2.05506e-30	6.87174e-29
70152	Mettl7a1	-2.29395	5.04695	131.119	2.33161e-30	7.77962e-29
235180	Fez1	2.26029	5.26565	130.888	2.61944e-30	8.72111e-29
18542	Pcolce	-2.47756	8.7201	130.727	2.84133e-30	9.43946e-29
71355	Col24a1	2.6538	3.85261	130.669	2.92517e-30	9.69711e-29
15473	Rida	2.47727	5.83227	130.607	3.0188e-30	9.98601e-29
103466	Nt5dc3	1.84377	6.2669	130.528	3.14056e-30	1.03665e-28
67564	Tmem35a	2.6279	3.69636	130.253	3.60799e-30	1.1884e-28
20660	Sorl1	-3.87506	3.00588	130.196	3.71265e-30	1.22027e-28
20540	Slc7a7	3.10461	4.44385	130.123	3.85233e-30	1.26348e-28
101706	Numa1	-1.77219	7.19821	129.591	5.0352e-30	1.64793e-28
15904	Id4	2.51801	6.40872	129.418	5.49491e-30	1.79458e-28
235086	Igsf9b	5.94535	2.72703	129.406	5.52842e-30	1.8017e-28
110351	Rap1gap	2.7522	4.0111	129.242	6.00327e-30	1.95233e-28
11601	Angpt2	3.27974	3.13114	128.957	6.93036e-30	2.24909e-28
73504	1700071M16Rik	10.5864	1.49611	128.674	7.99175e-30	2.58809e-28
16391	Irf9	-2.50892	5.26724	128.365	9.33854e-30	3.0179e-28
20753	Sprr1a	10.0224	5.57789	128.337	9.47194e-30	3.0546e-28
18559	Pctp	2.58458	3.82598	128.239	9.95227e-30	3.2028e-28
12450	Ccng1	2.20414	8.83499	127.936	1.15896e-29	3.72197e-28
18526	Pcdh10	6.78595	3.1708	127.912	1.17358e-29	3.76107e-28
107607	Nod1	-2.91896	4.0228	127.873	1.19681e-29	3.82754e-28
77975	Tmem50b	1.9069	6.0634	127.637	1.34763e-29	4.30097e-28
66684	Tceal8	2.33266	7.76477	127.534	1.41915e-29	4.51986e-28
100040617	Wincr1	5.46285	2.89205	127.529	1.42296e-29	4.52266e-28
20308	Ccl9	-7.00714	3.59215	127.032	1.82786e-29	5.79763e-28
67703	Kirrel3	-5.23578	3.67198	126.842	2.01141e-29	6.3667e-28
71310	Tbc1d9	3.23614	3.24857	126.496	2.39443e-29	7.56355e-28
319520	Dusp4	2.78795	4.88569	126.184	2.80315e-29	8.8365e-28
17132	Maf	-2.1215	5.60387	126.12	2.89513e-29	9.10783e-28
13039	Ctsl	1.74903	9.99906	125.656	3.65597e-29	1.14779e-27
17380	Mme	-2.95952	9.10166	125.427	4.10448e-29	1.28599e-27
269608	Plekhg5	-2.57112	5.39584	125.088	4.86949e-29	1.52258e-27
227231	Cps1	10.5984	1.53431	124.554	6.3713e-29	1.98813e-27
54381	Cpq	-1.84558	6.51101	124.542	6.41081e-29	1.99642e-27
17219	Mcm6	-2.0672	5.21151	124.421	6.81305e-29	2.1174e-27
93806	Serpinb9g	10.6265	1.56845	124.354	7.04613e-29	2.18543e-27
277360	Prex1	2.98102	3.69187	124.097	8.02431e-29	2.48383e-27
105387	Akr1c14	-6.48389	3.74537	123.827	9.19122e-29	2.83933e-27
12575	Cdkn1a	2.07683	8.16149	123.416	1.13049e-28	3.48264e-27
59095	Fxyd6	2.62247	6.49818	123.414	1.13189e-28	3.48264e-27
18587	Pde6b	5.65302	3.22396	123.075	1.34265e-28	4.1229e-27
67374	Jam2	2.21462	5.53906	122.783	1.55581e-28	4.76794e-27
226778	Mark1	1.95646	7.09851	122.731	1.59673e-28	4.88366e-27
170706	Tmem37	3.05954	3.72907	122.683	1.63642e-28	4.99514e-27
[truncated: 14,910 more rows]
