# Supplementary material for: Multi-omics characterization of partial chemical reprogramming reveals evidence of cell rejuvenation
Source: eLife. 2024 Mar 22;12:RP90579. doi: 10.7554/eLife.90579 (PMC10959535; doi:10.7554/eLife.90579)
Supplement: Figure 3—source data 2. [file elife-90579-fig3-data2.xlsx]

## Sheet: description
statistical contrast

## Sheet: 2c
GeneSymbol

## Sheet: 7c
GeneSymbol

## Sheet: M20
GeneSymbol

## Sheet: 2c_+_2cXM20
GeneSymbol

## Sheet: 7c_+_7cXM20
GeneSymbol

## Sheet: M20_+_2cXM20
GeneSymbol

## Sheet: M20_+_7cXM20
GeneSymbol

## Sheet: 2cXM20
GeneSymbol

## Sheet: 7cXM20
GeneSymbol

[truncated: 3 more sheets: 7cXM20_-_2cXM20, 7c_-_2c, 7c_+_7cXM20_-_2c_+_2cXM20]
