# Supplementary material for: Multi-omics characterization of partial chemical reprogramming reveals evidence of cell rejuvenation
Source: eLife. 2024 Mar 22;12:RP90579. doi: 10.7554/eLife.90579 (PMC10959535; doi:10.7554/eLife.90579)
Supplement: Figure 3—source data 3. [file elife-90579-fig3-data3.xlsx]

## Sheet: GSEA_table_together
Pathway Term	Chemical reprogramming: 2c, 4m			Chemical reprogramming: 2c, 20m			Chemical reprogramming: 7c, 4m			Chemical reprogramming: 7c, 20m			OSKM reprogramming: Mouse			OSKM reprogramming: Mouse and Human			Aging: Brain			Aging: Liver			Aging: Human			Aging: Rat			Aging: Mouse			Aging: Kidney
	NES	P.Value	P.Adjusted	NES	P.Value	P.Adjusted	NES	P.Value	P.Adjusted	NES	P.Value	P.Adjusted	NES	P.Value	P.Adjusted	NES	P.Value	P.Adjusted	NES	P.Value	P.Adjusted	NES	P.Value	P.Adjusted	NES	P.Value	P.Adjusted	NES	P.Value	P.Adjusted	NES	P.Value	P.Adjusted	NES	P.Value	P.Adjusted
HALLMARK INFLAMMATORY RESPONSE	-1.51852	0.00226244	0.048599	-1.63449	0.000873362	0.0650364	1.3829	0.021215	0.703022	1.16647	0.190717	0.750108	-1.70767	0.000146542	0.00278502	-1.62372	0.000426015	0.00322025	1.86093	0.000219635	0.00950081	2.11392	0.000286205	0.00730957	1.5528	0.00229501	0.0723671	1.91526	0.000498256	0.00808469	2.43626	0.00084246	0.00960416	2.35998	0.00014537	0.00292644
REACTOME INTERLEUKIN 10 SIGNALING	-1.74262	0.00132363	0.0368049	-1.72861	0.00413881	0.184922	1.10743	0.355963	0.965007	1.02511	0.443587	0.873874	-1.64803	0.00500751	0.0224437	-1.66176	0.00409366	0.0178566	2.02289	0.000643501	0.0186285	2.10091	0.000238892	0.00730957	1.83385	0.00278996	0.0776424	2.21242	0.000453515	0.00789032	2.15889	0.000325627	0.00960416	2.0051	0.000187899	0.00294091
REACTOME RESPIRATORY ELECTRON TRANSPORT	1.73271	0.000117288	0.00742983	1.60838	0.00119732	0.0743002	1.56243	0.00337952	0.430399	1.64808	0.00235611	0.164622	1.35862	0.0334247	0.0927553	0.833623	0.842151	0.918367	-1.86483	0.00131234	0.0308672	-2.16548	0.000159541	0.00730957	-2.39108	0.00019861	0.0141838	-2.30322	0.000172206	0.00586665	-2.49283	0.000121477	0.00781227	-1.75704	0.00055142	0.00721034
REACTOME RESPIRATORY ELECTRON TRANSPORT ATP SYNTHESIS BY CHEMIOSMOTIC COUPLING AND HEAT PRODUCTION BY UNCOUPLING PROTEINS	1.76019	0.000114025	0.00742983	1.6313	0.000351865	0.0393033	1.57429	0.00232134	0.372077	1.63265	0.0028002	0.164622	1.45845	0.00758853	0.0305997	1.01731	0.407604	0.596219	-1.78646	0.00111878	0.0293744	-2.15762	0.000156519	0.00730957	-2.45531	0.000197668	0.0141838	-2.30717	0.000168833	0.00586665	-2.4152	0.000117897	0.00781227	-1.73086	0.000293341	0.00426791
HALLMARK COAGULATION	-1.43855	0.0145482	0.162504	-1.35516	0.043222	0.432868	0.964111	0.520564	0.991099	1.07607	0.334498	0.830108	-1.44437	0.00880255	0.0344905	-1.6332	0.00104618	0.00621075	2.1643	0.000218675	0.00950081	2.08698	0.000278319	0.00730957	1.66153	0.00222402	0.0723671	1.78163	0.0034255	0.0390039	2.18599	0.000604595	0.00960416	2.08749	0.000151263	0.00292644
HALLMARK IL6 JAK STAT3 SIGNALING	-1.83767	0.00113701	0.0357269	-1.49043	0.0210149	0.355661	-0.932054	0.570411	0.991099	0.953674	0.530591	0.908119	-1.62487	0.00125885	0.00722824	-1.72729	0.000611154	0.00408667	2.24583	0.00021427	0.00950081	2.08794	0.000258532	0.00730957	1.63315	0.00663317	0.13278	2.41924	0.000235294	0.00586665	2.55348	0.000499002	0.00960416	2.27553	0.000161996	0.00292644
KEGG TOLL LIKE RECEPTOR SIGNALING PATHWAY	-1.82268	0.00118343	0.0357269	-1.83578	0.00104058	0.0686941	-1.41543	0.0388676	0.809491	-1.31806	0.0790171	0.566548	-1.88765	0.000157257	0.00278502	-1.84807	0.000305344	0.00268997	1.6416	0.00452586	0.0594151	1.4353	0.0515544	0.179336	0.914064	0.60692	0.944742	1.90745	0.00212967	0.02571	2.02817	0.000519481	0.00960416	1.83974	0.000973078	0.0105809
REACTOME EUKARYOTIC TRANSLATION ELONGATION	0.405434	1	1	-1.18447	0.157955	0.641583	0.835898	0.766593	1	1.06146	0.362398	0.835574	2.49116	0.000274198	0.00278502	2.09794	0.000271592	0.00268997	2.11117	0.000213904	0.00950081	1.96568	0.00121803	0.0161085	1.84754	0.00338713	0.0858825	2.28155	0.000227118	0.00586665	2.06946	0.000550055	0.00960416	2.07869	0.000175809	0.00292644
REACTOME NEUTROPHIL DEGRANULATION	0.940013	0.671657	1	-1.27864	0.0144928	0.284007	0.938177	0.63836	0.994304	0.935051	0.634667	0.943817	-1.37226	0.00141844	0.00792545	-1.59418	0.000126904	0.00268997	2.25927	0.00022748	0.00950081	2.42454	0.000356633	0.00771913	1.46904	0.0015145	0.0614465	2.2065	0.000272702	0.00594017	2.46828	0.00307692	0.0201026	2.40986	0.000124673	0.00292644
REACTOME SIGNALING BY INTERLEUKINS	-1.29785	0.00729927	0.100636	-1.40294	0.00649351	0.226664	0.87378	0.827647	1	0.886242	0.769176	0.99308	-1.37538	0.00156576	0.00859445	-1.41071	0.00114402	0.00669361	1.95802	0.000227428	0.00950081	1.83595	0.00034662	0.00767292	1.43423	0.00238975	0.0723671	2.33764	0.000271665	0.00594017	2.02835	0.00236407	0.0166292	2.25383	0.000125802	0.00292644
HALLMARK ALLOGRAFT REJECTION	-0.936574	0.643364	1	-1.17585	0.140857	0.617801	1.30838	0.0564752	0.826365	1.34895	0.0491357	0.558361	-1.42038	0.00617193	0.0261572	-1.38328	0.012532	0.0430833	1.5945	0.0015324	0.032643	2.43248	0.000282805	0.00730957	1.33377	0.0372658	0.332843	2.56168	0.000248633	0.00586665	2.65938	0.00084317	0.00960416	2.56326	0.000144655	0.00292644
HALLMARK APOPTOSIS	0.762599	0.89125	1	-1.05621	0.302102	0.787948	-1.11248	0.223458	0.963258	-1.24396	0.082218	0.566548	-1.46377	0.00462135	0.0210923	-1.63737	0.000438404	0.00327324	1.75122	0.000430385	0.0137448	1.86709	0.000290023	0.00730957	1.48307	0.0102817	0.172149	2.20842	0.000250063	0.00586665	1.81069	0.0008285	0.00960416	2.17828	0.00014341	0.00292644
HALLMARK COMPLEMENT	-1.26062	0.052	0.400579	-1.22475	0.065153	0.492144	1.00614	0.435979	0.980017	0.893168	0.690517	0.968979	-1.3552	0.0174897	0.0585811	-1.45229	0.00497866	0.0209655	1.80732	0.000217628	0.00950081	2.26751	0.000290613	0.00730957	1.33709	0.0379225	0.332843	2.34394	0.000249501	0.00586665	2.10709	0.000863558	0.00960416	2.16711	0.000142714	0.00292644
HALLMARK EPITHELIAL MESENCHYMAL TRANSITION	-1.44685	0.00530973	0.0872202	-1.4915	0.00472255	0.19874	1.16192	0.165936	0.960629	-1.16228	0.133464	0.649385	-2.1995	0.000146628	0.00278502	-2.37592	0.000142389	0.00268997	1.51909	0.00371503	0.0530921	1.34796	0.0479059	0.170917	1.73031	0.000416406	0.023756	-0.722738	0.963918	0.999101	1.87053	0.00092081	0.00960416	2.19203	0.000140726	0.00292644
HALLMARK INTERFERON ALPHA RESPONSE	-1.71521	0.00135962	0.0368049	-1.71744	0.000605694	0.0520431	-1.86491	0.00024564	0.148854	-2.09513	0.000246609	0.103656	-0.872405	0.730739	0.824562	-0.958725	0.544887	0.718015	2.36422	0.000212857	0.00950081	2.33586	0.000271665	0.00730957	1.69942	0.00482121	0.105789	2.516	0.000241546	0.00586665	1.78354	0.000582072	0.00960416	2.27361	0.000158604	0.00292644
HALLMARK MYOGENESIS	1.40571	0.00488271	0.0826361	1.74414	0.000109194	0.0192666	0.95374	0.554423	0.991099	-1.14092	0.163322	0.703087	-1.63369	0.000146542	0.00278502	-1.5891	0.000568586	0.00388746	1.77386	0.000218103	0.00950081	1.44561	0.028177	0.125317	1.50216	0.00374454	0.0918166	0.925014	0.596081	0.860618	1.52823	0.000918274	0.00960416	1.23826	0.122464	0.38679
HALLMARK OXIDATIVE PHOSPHORYLATION	1.80748	0.00010563	0.00742983	1.66822	0.000108885	0.0192666	1.43971	0.00638331	0.475344	1.51898	0.00357865	0.173798	-0.810359	0.927406	0.955788	-0.833023	0.871337	0.934142	-1.2256	0.0998892	0.367345	-2.02592	0.00014892	0.00730957	-2.46431	0.00019425	0.0141838	-2.25735	0.000164908	0.00586665	-2.26451	0.000109902	0.00781227	-1.36454	0.0147801	0.0834308
HALLMARK TNFA SIGNALING VIA NFKB	-1.19491	0.0775194	0.518498	-1.37859	0.0142857	0.284007	1.33543	0.0311811	0.809491	1.28627	0.0639825	0.566548	-1.60232	0.000293902	0.00278502	-1.88207	0.000142389	0.00268997	2.04358	0.000219974	0.00950081	2.22167	0.000288018	0.00730957	1.33077	0.0372994	0.332843	2.56906	0.000251762	0.00586665	2.41547	0.000896057	0.00960416	2.34456	0.000141163	0.00292644
KEGG HUNTINGTONS DISEASE	1.67202	0.000108554	0.00742983	1.38825	0.0188911	0.329709	1.42013	0.0136044	0.648966	1.35669	0.0370719	0.498908	1.42286	0.00364631	0.0174073	1.37253	0.0140669	0.0470314	-1.23091	0.110428	0.390826	-1.79911	0.000153988	0.00730957	-2.01044	0.000196002	0.0141838	-2.10651	0.000167448	0.00586665	-1.99679	0.000113314	0.00781227	-0.719981	0.988152	1
KEGG JAK STAT SIGNALING PATHWAY	-1.12979	0.210027	0.771711	-1.08689	0.268485	0.763272	0.909668	0.623352	0.991099	-0.940631	0.565517	0.92082	-1.48185	0.00480769	0.0216259	-1.45843	0.00864639	0.0319838	1.60906	0.0039465	0.0543366	1.85023	0.000804074	0.0116736	1.19151	0.161473	0.589799	2.21026	0.000237699	0.00586665	1.99985	0.000582072	0.00960416	1.88967	0.0003125	0.00448351
KEGG LEISHMANIA INFECTION	0.863631	0.688003	1	0.776096	0.795644	1	0.80585	0.774846	1	0.973707	0.495034	0.886313	-1.46361	0.0206571	0.0661665	-1.47924	0.0208367	0.0655251	1.78033	0.00255973	0.0437868	2.07196	0.000248077	0.00730957	1.34611	0.0894244	0.50253	2.29272	0.000230415	0.00586665	2.55602	0.000433463	0.00960416	2.19821	0.000172652	0.00292644
KEGG OXIDATIVE PHOSPHORYLATION	1.70793	0.000114692	0.00742983	1.40651	0.0255535	0.396434	1.53712	0.00399534	0.430399	1.61036	0.0034774	0.173798	1.34592	0.0246319	0.0746749	-0.813765	0.853088	0.9278	-1.58978	0.00859171	0.0915098	-2.01901	0.000158203	0.00730957	-2.36388	0.000197122	0.0141838	-2.27322	0.000170387	0.00586665	-2.23644	0.00011919	0.00781227	-1.10334	0.252877	0.557082
KEGG RIBOSOME	0.49716	0.999642	1	-1.1088	0.238636	0.734316	0.844929	0.748081	1	1.05642	0.372622	0.836149	2.48788	0.000269034	0.00278502	2.09785	0.000271003	0.00268997	2.06329	0.000425622	0.0137448	1.83427	0.00531273	0.052802	1.80239	0.00438859	0.100428	2.23881	0.000226706	0.00586665	1.7647	0.000537057	0.00960416	1.97138	0.000178476	0.00292644
REACTOME COMPLEX I BIOGENESIS	1.59211	0.000644081	0.0266459	1.44482	0.0325043	0.426982	1.41326	0.0469244	0.809491	1.57302	0.0125065	0.340726	1.62773	0.00581542	0.0251966	1.12346	0.256582	0.434299	-1.65469	0.0154447	0.129164	-2.07077	0.000167954	0.00730957	-2.14289	0.000201126	0.0141838	-2.12146	0.000176429	0.00586665	-2.31472	0.000130446	0.00781227	-1.63089	0.00651702	0.0428795
REACTOME DISEASES OF IMMUNE SYSTEM	-1.24022	0.192636	0.757655	-1.12358	0.302623	0.787948	-1.38904	0.0839831	0.87672	-1.423	0.0752358	0.566548	-1.75096	0.000853242	0.00527767	-1.78272	0.00067659	0.00435667	1.80926	0.00535332	0.0661478	1.92515	0.0024108	0.0269899	1.35762	0.113704	0.535021	2.0817	0.000675524	0.0102557	2.00664	0.00237127	0.0166292	1.8665	0.000955292	0.0104981
REACTOME INTERLEUKIN 12 FAMILY SIGNALING	0.950428	0.569291	1	0.630273	0.946674	1	-0.826663	0.74977	1	-0.944129	0.544905	0.908119	-1.44567	0.0298949	0.0854335	-1.58713	0.00727684	0.0282036	1.82418	0.00129143	0.0308672	1.70727	0.0158847	0.0915466	1.0353	0.389177	0.847662	1.89936	0.00549073	0.0571478	1.92469	0.000793021	0.00960416	1.75392	0.00424628	0.0306742
REACTOME INTERLEUKIN 4 AND INTERLEUKIN 13 SIGNALING	-1.57917	0.00451031	0.0775079	-1.52288	0.0107955	0.262142	1.0144	0.432694	0.980017	1.05912	0.365634	0.835574	-1.2247	0.11504	0.233834	-1.27588	0.0773989	0.185788	1.93339	0.000215146	0.00950081	2.00823	0.000257136	0.00730957	2.13974	0.000203211	0.0141838	2.22527	0.000236463	0.00586665	2.36444	0.000533618	0.00960416	2.22552	0.000159795	0.00292644
REACTOME MITOCHONDRIAL PROTEIN IMPORT	1.55228	0.00160296	0.039789	1.42449	0.0339689	0.429079	1.48732	0.0180149	0.701239	1.41531	0.0473974	0.558361	1.22028	0.130355	0.259461	1.28159	0.0933862	0.215693	-1.7496	0.00564334	0.0671424	-1.65598	0.00611065	0.0554157	-2.07426	0.000199521	0.0141838	-1.90793	0.0024386	0.029089	-2.08884	0.00012773	0.00781227	-1.5567	0.0120331	0.0718508
REACTOME MITOCHONDRIAL TRANSLATION	1.52419	0.00152118	0.0393088	1.41394	0.0264544	0.404788	1.15517	0.224676	0.963258	1.40062	0.0378406	0.503189	1.13371	0.190098	0.338375	1.1901	0.137832	0.285274	-2.01101	0.000374742	0.0137448	-1.87233	0.000318573	0.00738785	-2.08163	0.000199045	0.0141838	-2.00938	0.0001703	0.00586665	-2.43343	0.000120715	0.00781227	-2.06523	0.000279486	0.00412441
REACTOME PLATELET ACTIVATION SIGNALING AND AGGREGATION	0.755011	0.9239	1	-1.05414	0.278796	0.763272	0.906764	0.683362	1	0.998599	0.451544	0.876799	-1.7778	0.000142045	0.00278502	-1.85101	0.000136874	0.00268997	1.75446	0.000224417	0.00950081	2.08703	0.000307598	0.00730957	-0.836981	0.883597	0.992947	1.82331	0.000258732	0.00589204	2.36202	0.00121065	0.0114481	2.12376	0.000135227	0.00292644
REACTOME RESPONSE OF EIF2AK4 GCN2 TO AMINO ACID DEFICIENCY	0.67743	0.9541	1	-0.812102	0.86946	1	0.843218	0.760141	1	0.869563	0.699175	0.975004	2.43221	0.000274499	0.00278502	1.97405	0.000281452	0.00268997	1.82749	0.00214362	0.0400394	1.6612	0.0219191	0.106678	1.80196	0.0038	0.0918166	2.31782	0.000229043	0.00586665	1.97129	0.000588928	0.00960416	2.02156	0.000169722	0.00292644
REACTOME RESPONSE TO ELEVATED PLATELET CYTOSOLIC CA2	0.760477	0.874002	1	-1.07421	0.283875	0.769633	-1.07747	0.288089	0.963258	-1.1041	0.25566	0.804879	-1.78998	0.000152138	0.00278502	-1.98015	0.000149076	0.00268997	1.8215	0.0004385	0.0137448	1.93543	0.00027933	0.00730957	1.01274	0.414773	0.866769	1.69371	0.0061546	0.0616691	2.09439	0.000675676	0.00960416	2.19368	0.000149454	0.00292644
REACTOME RHO GTPASE CYCLE	1.02877	0.423867	0.931929	1.04713	0.375459	0.857644	-1.04557	0.283873	0.963258	-0.9783	0.530125	0.908119	-1.66514	0.000130446	0.00278502	-1.64492	0.000127097	0.00268997	1.46646	0.000927644	0.0250615	1.59807	0.000746269	0.0111909	1.11866	0.146595	0.562548	1.38634	0.0101494	0.092452	1.39324	0.00344828	0.0214869	1.74804	0.000121936	0.00292644
REACTOME THE CITRIC ACID TCA CYCLE AND RESPIRATORY ELECTRON TRANSPORT	1.71193	0.000108719	0.00742983	1.493	0.00279548	0.130106	1.18434	0.152285	0.939792	1.2036	0.141847	0.680015	1.33978	0.0151976	0.0530425	0.868004	0.829947	0.914896	-1.49045	0.0135361	0.118467	-2.09113	0.000152393	0.00730957	-2.48456	0.000197278	0.0141838	-2.24871	0.000166722	0.00586665	-2.40408	0.000113097	0.00781227	-1.5896	0.00163666	0.0162565
REACTOME TOLL LIKE RECEPTOR CASCADES	-0.95635	0.589418	1	-1.17978	0.135874	0.614237	0.84387	0.795991	1	0.984256	0.474768	0.876799	-1.34745	0.0259254	0.0780266	-1.34236	0.0282436	0.0834283	1.65091	0.00129926	0.0308672	1.72558	0.00197573	0.0228019	-0.80716	0.872774	0.992947	2.11288	0.000249128	0.00586665	1.9255	0.000788022	0.00960416	2.13479	0.000147037	0.00292644
HALLMARK HYPOXIA	-1.40034	0.00656814	0.0952807	-1.58647	0.00227531	0.121025	1.07636	0.29373	0.963258	0.988065	0.477255	0.876799	-1.37358	0.0133706	0.0477356	-1.53677	0.000854336	0.0052778	1.75419	0.000218579	0.00950081	1.41326	0.0249413	0.115624	1.20036	0.115803	0.535021	1.12413	0.226217	0.586982	1.67956	0.000918274	0.00960416	1.63543	0.00210852	0.0191061
HALLMARK IL2 STAT5 SIGNALING	0.821234	0.830587	1	-1.06864	0.261224	0.763272	0.937213	0.595768	0.991099	-1.15487	0.154426	0.700952	-1.4122	0.00646583	0.0271427	-1.42524	0.00639659	0.0258626	1.9931	0.000220361	0.00950081	1.33359	0.0527078	0.182047	1.31833	0.0407739	0.349557	2.08693	0.00024975	0.00586665	1.88825	0.00092081	0.00960416	2.12627	0.000141243	0.00292644
HALLMARK INTERFERON GAMMA RESPONSE	-1.24479	0.0430416	0.353511	-1.3599	0.0143737	0.284007	-1.3316	0.029316	0.809491	-1.73589	0.000278396	0.103656	-0.88004	0.779326	0.856645	-1.14371	0.170013	0.334799	2.32394	0.000217912	0.00950081	2.56448	0.000292997	0.00730957	1.58692	0.00165051	0.0614465	2.78163	0.000250878	0.00586665	2.38642	0.00102249	0.0101124	2.61948	0.000141743	0.00292644
HALLMARK P53 PATHWAY	1.23104	0.0938264	0.563463	1.34081	0.0282214	0.41478	1.14979	0.180184	0.963258	1.14466	0.196029	0.755051	-1.1545	0.148273	0.28197	-1.61914	0.000425713	0.00322025	1.78659	0.000219202	0.00950081	1.58136	0.00469346	0.0479826	1.47846	0.00710851	0.135254	2.0018	0.000249501	0.00586665	1.71807	0.000953289	0.00960416	1.85826	0.000140568	0.00292644
KEGG CHEMOKINE SIGNALING PATHWAY	0.884031	0.717698	1	0.71517	0.935738	1	-0.853971	0.813748	1	-1.03519	0.362046	0.835574	-1.5375	0.00133156	0.00754146	-1.31424	0.0350649	0.0999392	1.12773	0.216786	0.529192	2.26676	0.000281373	0.00730957	-0.926031	0.612332	0.94603	1.95029	0.000249066	0.00586665	2.42506	0.000788022	0.00960416	2.17766	0.00014708	0.00292644
KEGG CYTOKINE CYTOKINE RECEPTOR INTERACTION	0.779357	0.863783	1	0.904899	0.663177	1	1.22735	0.117494	0.906723	1.12141	0.244398	0.796314	-1.54993	0.000720046	0.00481159	-1.75465	0.000139528	0.00268997	1.58112	0.0017494	0.0365754	1.49105	0.0223964	0.106932	1.32683	0.0376534	0.332843	2.07668	0.000246609	0.00586665	2.30742	0.000740741	0.00960416	2.18487	0.000146649	0.00292644
KEGG FC GAMMA R MEDIATED PHAGOCYTOSIS	-1.0704	0.297649	0.863567	-1.18567	0.153552	0.632906	-0.96194	0.513317	0.991099	-0.858984	0.736291	0.987429	-1.55533	0.00299401	0.0145386	-1.69709	0.000914077	0.00559011	1.39954	0.0434222	0.238048	1.98302	0.000267809	0.00730957	-1.27323	0.111177	0.535021	2.13236	0.000242131	0.00586665	1.97473	0.000564972	0.00960416	2.17389	0.000156104	0.00292644
KEGG LYSOSOME	0.882807	0.706284	1	-0.787128	0.939767	1	1.57332	0.0023198	0.372077	1.57767	0.00493178	0.191572	-1.31595	0.0461823	0.118891	-1.69524	0.000596214	0.00404312	2.21207	0.000218007	0.00950081	1.98764	0.00027933	0.00730957	1.3809	0.043372	0.358605	2.28237	0.000246124	0.00586665	2.31745	0.000666223	0.00960416	2.01545	0.000150512	0.00292644
KEGG PARKINSONS DISEASE	1.68544	0.000114758	0.00742983	1.30237	0.0788885	0.506257	1.36227	0.0442035	0.809491	1.19334	0.174619	0.722405	1.17928	0.131362	0.260632	0.804668	0.908056	0.946151	-1.81794	0.000932314	0.0250615	-1.92677	0.00015868	0.00730957	-2.4178	0.000198138	0.0141838	-2.22873	0.000170416	0.00586665	-2.24696	0.000119417	0.00781227	-1.01021	0.429922	0.723305
KEGG REGULATION OF ACTIN CYTOSKELETON	0.762296	0.907286	1	0.943719	0.604128	0.980829	-1.03261	0.361247	0.965007	-1.21916	0.0874514	0.572821	-1.69013	0.000145943	0.00278502	-1.51609	0.00112518	0.00664728	1.0914	0.26046	0.577821	1.94566	0.000287439	0.00730957	-0.76742	0.957321	0.995291	1.73922	0.0010068	0.0140112	2.14197	0.000942507	0.00960416	2.00603	0.000140726	0.00292644
REACTOME CDC42 GTPASE CYCLE	0.799579	0.846786	1	0.799351	0.841084	1	-1.10248	0.236961	0.963258	-1.14568	0.177547	0.726447	-1.53987	0.00179829	0.00953477	-1.49086	0.00514479	0.0215162	1.51967	0.00539025	0.0661478	1.86282	0.000570613	0.00940245	0.728883	0.9776	0.996841	1.15821	0.196411	0.551271	1.6047	0.000833333	0.00960416	1.57878	0.00638699	0.0422934
REACTOME CELL SURFACE INTERACTIONS AT THE VASCULAR WALL	-1.53219	0.00677507	0.0970224	-0.996033	0.444848	0.906506	1.02013	0.41906	0.980017	0.988903	0.477112	0.876799	-1.25769	0.0811559	0.18025	-1.21415	0.124514	0.262622	1.57282	0.00792291	0.0851902	1.91282	0.000544959	0.00915156	0.899325	0.656389	0.960055	1.81394	0.00267835	0.0312059	1.60519	0.0036452	0.0218307	1.95994	0.000155642	0.00292644
REACTOME EXTRACELLULAR MATRIX ORGANIZATION	-1.29032	0.0159744	0.174936	-1.24332	0.0311927	0.425881	-1.22621	0.0591476	0.847024	-1.40987	0.00601323	0.209899	-1.91199	0.000137931	0.00278502	-2.02948	0.000133511	0.00268997	1.64236	0.000224669	0.00950081	1.82519	0.000596481	0.00952414	1.68081	0.000211327	0.0141838	0.9093	0.655869	0.88364	1.158	0.0676884	0.170885	2.16054	0.000134935	0.00292644
REACTOME FCGAMMA RECEPTOR FCGR DEPENDENT PHAGOCYTOSIS	-1.22119	0.1207	0.616781	-1.24352	0.113127	0.56665	0.639936	0.988683	1	-0.667194	0.98063	1	-1.61425	0.00173092	0.00929624	-1.57564	0.00461609	0.0197809	0.985241	0.462655	0.747091	2.06468	0.000528402	0.00911345	-1.44183	0.0389585	0.339325	1.77538	0.00671785	0.065993	2.24507	0.000550964	0.00960416	2.05468	0.000156152	0.00292644
REACTOME LEISHMANIA INFECTION	0.803299	0.851195	1	0.833278	0.795546	1	1.06749	0.324398	0.965007	1.06138	0.334791	0.830108	-1.64158	0.000142755	0.00278502	-1.47992	0.00124138	0.00705962	1.27364	0.0581344	0.27918	2.03384	0.000286944	0.00730957	0.873648	0.792151	0.980875	1.94337	0.000250063	0.00586665	2.56083	0.0008726	0.00960416	2.06259	0.000141243	0.00292644
REACTOME MHC CLASS II ANTIGEN PRESENTATION	-1.58027	0.00374813	0.0664549	-1.52905	0.00648929	0.226664	1.06118	0.352269	0.965007	1.00413	0.449524	0.876298	-1.48877	0.00678489	0.0278619	-1.46884	0.0106495	0.0377854	1.27758	0.0995717	0.367345	1.6735	0.00543331	0.0529204	0.777213	0.891123	0.992947	1.34425	0.0858821	0.337953	1.57645	0.00362757	0.0218307	2.01137	0.00015321	0.00292644
REACTOME NONSENSE MEDIATED DECAY NMD	0.599404	0.994725	1	-0.845387	0.838601	1	0.7345	0.949675	1	0.921639	0.607662	0.933989	2.39073	0.000283607	0.00278502	2.24279	0.000289687	0.00268997	1.66737	0.00727117	0.0820915	1.34593	0.108712	0.28012	1.6609	0.00978435	0.168947	2.03413	0.00139438	0.018145	1.51657	0.00443599	0.0247515	1.73982	0.0033173	0.0257652
REACTOME PLATELET AGGREGATION PLUG FORMATION	-1.65265	0.00559076	0.0881599	-1.25033	0.163766	0.643707	-0.836425	0.70636	1	-0.942338	0.544091	0.908119	-1.74599	0.00118403	0.00705629	-1.80305	0.000834446	0.00521607	1.76289	0.00471597	0.0605038	1.75705	0.00999025	0.0760196	0.926412	0.563383	0.927631	1.54733	0.0515558	0.267663	1.81998	0.00489682	0.0263938	1.26112	0.188649	0.483568
REACTOME RAC1 GTPASE CYCLE	1.02199	0.455114	0.95011	1.08494	0.326938	0.812108	-1.09288	0.243811	0.963258	-1.1014	0.2266	0.772594	-1.56145	0.000737572	0.00481159	-1.42457	0.00800686	0.0304511	1.45704	0.00895979	0.093663	1.8791	0.000579206	0.00940245	-0.698646	0.992871	0.996841	1.26532	0.10221	0.377178	1.73258	0.00094162	0.00960416	1.79564	0.000140766	0.00292644
REACTOME RAC2 GTPASE CYCLE	1.14492	0.270119	0.840454	1.17617	0.226134	0.721629	-1.05955	0.333333	0.965007	-0.987405	0.4721	0.876799	-1.62132	0.00125885	0.00722824	-1.58989	0.00367872	0.0163993	1.21823	0.148323	0.445849	1.90305	0.000533333	0.00911345	-0.74352	0.920616	0.99347	1.78483	0.0057943	0.0586454	1.79906	0.000545554	0.00960416	1.83813	0.000625	0.00797068
REACTOME RAC3 GTPASE CYCLE	1.24637	0.129704	0.627376	1.23991	0.147537	0.623661	-1.06425	0.322793	0.965007	-1.14141	0.229056	0.777675	-1.6848	0.000315159	0.00278502	-1.59225	0.00290298	0.0135882	0.973133	0.49247	0.758571	1.63441	0.0106667	0.0781153	-0.794504	0.85062	0.990877	1.71129	0.0105871	0.0950337	1.62008	0.00382305	0.0223981	1.69358	0.00393577	0.0291691
REACTOME REGULATION OF INSULIN LIKE GROWTH FACTOR IGF TRANSPORT AND UPTAKE BY INSULIN LIKE GROWTH FACTOR BINDING PROTEINS IGFBPS	-1.27268	0.0702626	0.49609	-1.4467	0.0242839	0.393118	-1.33327	0.0569652	0.826365	-1.60941	0.00394769	0.180934	-1.79138	0.000152091	0.00278502	-1.62449	0.00119119	0.00693623	1.65138	0.00431313	0.0579706	1.44626	0.03549	0.142252	1.62573	0.00386257	0.0918166	0.847442	0.716739	0.919001	1.87214	0.000533618	0.00960416	1.68583	0.00405869	0.029735
REACTOME RHOA GTPASE CYCLE	1.02559	0.445566	0.942609	1.20956	0.148859	0.623661	-1.21639	0.10343	0.906723	-1.0543	0.318331	0.830108	-1.72435	0.000300436	0.00278502	-1.55917	0.00132998	0.00739957	1.6164	0.00194426	0.0372047	1.5571	0.00883694	0.0712353	1.60894	0.00165153	0.0614465	1.02345	0.379785	0.730412	1.47766	0.00326797	0.0209126	1.44414	0.0262433	0.130963
REACTOME SELENOAMINO ACID METABOLISM	1.22938	0.130305	0.627376	0.892746	0.676844	1	1.47411	0.0104773	0.570407	1.24006	0.124525	0.649385	2.27977	0.000283366	0.00278502	1.96174	0.000291121	0.00268997	1.7242	0.00385604	0.0537811	1.53053	0.0372763	0.146993	1.23535	0.166733	0.598247	2.33941	0.000234687	0.00586665	1.69499	0.00131579	0.0115319	1.83022	0.00114811	0.0117425
REACTOME SRP DEPENDENT COTRANSLATIONAL PROTEIN TARGETING TO MEMBRANE	-0.426829	1	1	-1.40971	0.0269914	0.407425	1.05634	0.361986	0.965007	1.12116	0.263009	0.808441	1.55473	0.00284414	0.0141009	1.16045	0.168692	0.332736	1.88977	0.000427716	0.0137448	1.66037	0.0178616	0.0988476	1.29375	0.126806	0.537922	2.2859	0.000232396	0.00586665	1.97824	0.000633714	0.00960416	1.84058	0.00066346	0.00835798
HALLMARK ADIPOGENESIS	1.88859	0.000106	0.00742983	1.83841	0.00010917	0.0192666	1.07478	0.292503	0.963258	1.01916	0.409897	0.855804	1.04514	0.309762	0.467835	-1.04169	0.354019	0.54225	2.01348	0.000219058	0.00950081	-1.3781	0.0196399	0.102846	1.03476	0.372374	0.826611	-1.54822	0.00692841	0.0667525	-1.14558	0.193087	0.352792	-1.52951	0.00182282	0.0172659
HALLMARK APICAL JUNCTION	0.849387	0.792631	1	1.12406	0.258121	0.763272	-0.987136	0.46779	0.991099	-0.906873	0.712573	0.978893	-1.56198	0.000587803	0.00413787	-1.45531	0.0046855	0.0199486	1.19991	0.115882	0.398736	1.91114	0.000288018	0.00730957	0.849006	0.826359	0.990798	1.24453	0.118533	0.406967	1.76026	0.000896057	0.00960416	1.78961	0.000140174	0.00292644
HALLMARK KRAS SIGNALING UP	0.895776	0.71163	1	1.00172	0.486706	0.929709	1.27613	0.0637824	0.854259	1.2623	0.0884237	0.572821	-1.11578	0.209971	0.36086	-1.08438	0.264092	0.442091	1.54347	0.0028647	0.0468731	1.74285	0.00142939	0.0179028	1.16792	0.15103	0.570612	1.86276	0.00050025	0.00808469	2.19286	0.00094162	0.00960416	2.19797	0.000141183	0.00292644
KEGG ALZHEIMERS DISEASE	1.68214	0.000109806	0.00742983	1.3898	0.0187719	0.329709	0.956842	0.542646	0.991099	0.920004	0.612193	0.936739	0.939323	0.641841	0.760528	-0.932957	0.618766	0.779542	-0.96968	0.508145	0.764928	-1.73601	0.000463965	0.00903805	-2.15677	0.000196734	0.0141838	-2.04347	0.000335909	0.00659962	-1.81322	0.000114456	0.00781227	0.732725	0.922158	1
KEGG COMPLEMENT AND COAGULATION CASCADES	-1.61702	0.0110803	0.133083	-1.5349	0.0288644	0.418721	-1.11745	0.299932	0.963258	-1.25729	0.166173	0.703087	-0.701078	0.957598	0.978006	-1.02667	0.410597	0.597009	1.89194	0.000214454	0.00950081	2.18007	0.000251699	0.00730957	1.89582	0.000796654	0.0432849	1.7564	0.0129032	0.108647	2.30098	0.000371195	0.00960416	2.16839	0.00017334	0.00292644
KEGG NATURAL KILLER CELL MEDIATED CYTOTOXICITY	-1.06029	0.325849	0.879518	-1.28857	0.0883117	0.533052	-0.77004	0.89485	1	0.789495	0.820127	1	-1.39692	0.0224111	0.0695807	-1.29827	0.0640387	0.161356	1.21026	0.156297	0.458335	2.0593	0.000518672	0.00911345	-1.01433	0.418424	0.869677	2.03322	0.000239923	0.00586665	2.19687	0.000524659	0.00960416	2.18228	0.00015873	0.00292644
KEGG NEUROTROPHIN SIGNALING PATHWAY	0.95434	0.583689	1	0.969766	0.553255	0.972029	0.756147	0.939583	1	0.902165	0.650033	0.947746	-1.86772	0.000152858	0.00278502	-1.8183	0.000149098	0.00268997	1.07418	0.303885	0.624911	1.54025	0.0155989	0.0915466	-1.12619	0.22943	0.672956	1.63335	0.0106225	0.0950337	2.02479	0.000664011	0.00960416	1.31844	0.0834081	0.303382
KEGG PEROXISOME	1.63418	0.000120992	0.00742983	1.47013	0.0169617	0.313338	0.883373	0.662534	0.994986	0.829358	0.749957	0.987545	1.38894	0.029695	0.0853663	0.940954	0.579872	0.749155	0.83595	0.759303	0.902372	-1.54888	0.0111964	0.0796008	-1.12329	0.25782	0.715749	-0.565885	0.993087	0.999101	-1.56599	0.00661921	0.0327317	-1.56047	0.00721154	0.046755
KEGG VIRAL MYOCARDITIS	1.39355	0.0407059	0.341868	1.52938	0.0102645	0.262142	1.04554	0.401406	0.978593	0.923497	0.572347	0.923402	-1.51453	0.0124093	0.0450789	-1.32002	0.0769962	0.185553	1.10005	0.305085	0.625119	2.14572	0.000244379	0.00730957	1.30685	0.118579	0.535021	2.05872	0.0011542	0.0156285	2.03014	0.000856164	0.00960416	2.09982	0.00017334	0.00292644
REACTOME ACTIVATION OF THE MRNA UPON BINDING OF THE CAP BINDING COMPLEX AND EIFS AND SUBSEQUENT BINDING TO 43S	1.22138	0.180244	0.73593	-0.448113	1	1	1.10466	0.305223	0.963258	1.22505	0.177544	0.726447	1.99989	0.000255951	0.00278502	1.99624	0.000261917	0.00268997	-0.874882	0.650555	0.862061	1.41793	0.0833333	0.243744	1.40026	0.0896593	0.50253	2.17726	0.000456308	0.00789032	1.74838	0.00315884	0.0205135	1.84932	0.001053	0.0112139
REACTOME ANTIGEN PROCESSING CROSS PRESENTATION	-0.917799	0.641061	1	-1.05922	0.313144	0.801919	-0.86634	0.740113	1	-0.891438	0.674723	0.960555	-1.48615	0.00832562	0.0330374	-1.55572	0.00453926	0.0195204	1.49423	0.0233405	0.167486	1.20616	0.168392	0.362863	-0.765609	0.887167	0.992947	2.27936	0.000241896	0.00586665	1.39469	0.0236938	0.0805739	2.1323	0.000156006	0.00292644
REACTOME COMPLEMENT CASCADE	-1.47114	0.0484613	0.383167	-1.12856	0.289821	0.77633	-1.61045	0.00626959	0.475344	-1.79221	0.000665484	0.117141	1.0037	0.434005	0.586571	0.578083	0.997166	0.998841	2.09416	0.000429	0.0137448	2.08042	0.0004884	0.00911345	1.90753	0.00139303	0.0614465	1.7999	0.0136643	0.113154	1.99743	0.00106686	0.010361	2.11706	0.000181785	0.00293413
REACTOME DNA REPAIR	-0.82822	0.990826	1	-0.976631	0.533937	0.96506	-1.06387	0.270319	0.963258	-1.25627	0.0352534	0.498908	2.36048	0.000365764	0.00301816	2.42937	0.000394789	0.00304087	-1.08099	0.254292	0.573046	-1.55768	0.000724113	0.0111909	0.920927	0.673698	0.960055	-1.18427	0.139027	0.447927	-1.86187	0.000106918	0.00781227	-1.72883	0.00042517	0.0056978
REACTOME EUKARYOTIC TRANSLATION INITIATION	0.954265	0.582453	1	-0.673713	0.998607	1	1.12019	0.260358	0.963258	1.26672	0.107718	0.604626	2.25732	0.000283126	0.00278502	2.04084	0.000291886	0.00268997	1.4304	0.0531049	0.269712	1.39665	0.0797886	0.236933	1.5967	0.0159744	0.209712	2.1367	0.00023596	0.00586665	1.67629	0.00135227	0.011589	1.90593	0.000162866	0.00292644
REACTOME G ALPHA I SIGNALLING EVENTS	0.919087	0.662535	1	1.01214	0.465056	0.918542	-1.11384	0.216613	0.963258	-1.24003	0.0819582	0.566548	-1.55804	0.000138696	0.00278502	-1.31126	0.0199241	0.0629809	-1.14164	0.168916	0.474395	1.84337	0.00139509	0.0178792	-0.869074	0.807224	0.988911	1.15777	0.203579	0.559642	2.061	0.000867303	0.00960416	1.77598	0.000430231	0.0056978
REACTOME GLOBAL GENOME NUCLEOTIDE EXCISION REPAIR GG NER	0.469022	1	1	-0.739347	0.960852	1	-0.580263	1	1	0.532995	0.999661	1	2.151	0.000270856	0.00278502	2.12801	0.000282965	0.00268997	-0.812247	0.803782	0.915711	-1.52692	0.015468	0.0915466	-0.867467	0.691402	0.960889	-1.21326	0.177237	0.519273	-1.64715	0.0023253	0.0166005	-1.49453	0.0141745	0.0804522
REACTOME HEMOSTASIS	0.80384	0.935237	1	0.931866	0.686141	1	1.02287	0.387698	0.975356	0.997381	0.46592	0.876799	NA	NA	NA	NA	NA	NA	1.64501	0.000235627	0.00950081	2.00833	0.000382555	0.0081002	0.841357	0.971522	0.996841	1.63511	0.000286615	0.00595719	2.08157	0.00469484	0.0256905	2.10382	0.000119531	0.00292644
REACTOME INTERFERON ALPHA BETA SIGNALING	-1.61094	0.0114416	0.135961	-1.37551	0.0634376	0.488712	-1.70296	0.00185874	0.372077	-1.83908	0.000474383	0.117141	-0.836743	0.772435	0.851729	-0.828944	0.779898	0.878202	1.72146	0.00734659	0.0821217	1.91252	0.00122911	0.0161085	1.22508	0.190249	0.625087	2.12397	0.000692201	0.010352	1.97082	0.00130039	0.0115319	2.1001	0.000175809	0.00292644
REACTOME INTERFERON GAMMA SIGNALING	-1.26034	0.105354	0.582577	-0.913367	0.633766	0.991649	-1.25811	0.121841	0.906723	-1.5889	0.00889637	0.268574	-1.06413	0.337913	0.496508	-0.795982	0.862748	0.934142	1.75276	0.00278313	0.0462081	2.23332	0.000253357	0.00730957	1.28214	0.121956	0.537797	2.30988	0.000237586	0.00586665	2.40554	0.000514668	0.00960416	2.13426	0.000162681	0.00292644
REACTOME INTERFERON SIGNALING	-1.61302	0.00254453	0.0526341	-1.1669	0.125828	0.590244	-1.5709	0.000266525	0.148854	-1.83617	0.000274801	0.103656	-0.896944	0.731253	0.824562	1.11071	0.193388	0.36178	1.22124	0.128661	0.422263	2.1344	0.000285063	0.00730957	0.90321	0.670932	0.960055	2.23285	0.000248509	0.00586665	1.65438	0.000862069	0.00960416	2.1333	0.000145159	0.00292644
REACTOME INTERLEUKIN 2 FAMILY SIGNALING	-0.916161	0.582845	1	-1.35747	0.0995807	0.559785	-0.827115	0.712605	1	-1.05189	0.392122	0.84838	-0.772892	0.844767	0.898873	-1.18123	0.205074	0.374782	1.87503	0.00151253	0.032643	2.07724	0.000243665	0.00730957	1.13649	0.265441	0.722835	2.01312	0.00159854	0.0204573	1.79688	0.00381243	0.0223981	1.80883	0.00309035	0.0247797
REACTOME METABOLISM OF AMINO ACIDS AND DERIVATIVES	1.66737	0.000102176	0.00742983	1.34948	0.00878477	0.258226	1.34112	0.0155549	0.668262	1.43772	0.00497367	0.191572	1.62319	0.000387898	0.00315896	1.41894	0.000835771	0.00521607	1.51004	0.00224669	0.040262	-1.43413	0.00707683	0.0605249	-0.947425	0.594875	0.939846	1.27237	0.0654478	0.303636	-0.742353	0.974908	0.992625	0.942489	0.587291	0.844947
REACTOME NEURONAL SYSTEM	0.92319	0.677952	1	1.08756	0.308816	0.796645	1.2603	0.053427	0.817506	1.35013	0.0241814	0.42824	-1.48003	0.000265604	0.00278502	-1.16955	0.086594	0.203446	-2.04623	0.000178317	0.00950081	1.59977	0.00469208	0.0479826	-1.4415	0.00298507	0.0792086	-0.836069	0.83336	0.968709	1.41193	0.00131062	0.0115319	0.91624	0.641974	0.873727
REACTOME PARASITE INFECTION	-1.01951	0.401956	0.916864	-0.92521	0.572845	0.976152	0.701255	0.925685	1	0.74872	0.861101	1	-1.70211	0.00130145	0.00740458	-1.68853	0.00144648	0.00789402	0.980459	0.470664	0.748343	2.04443	0.000251067	0.00730957	-1.56741	0.0206827	0.234725	1.72639	0.0163399	0.126919	2.32299	0.000460193	0.00960416	1.98219	0.000165865	0.00292644
REACTOME PEROXISOMAL PROTEIN IMPORT	1.57848	0.00100705	0.0340871	1.33965	0.0859415	0.527454	-1.35583	0.0707635	0.868603	-1.19017	0.200095	0.757506	1.41038	0.0292581	0.0851766	1.08317	0.297901	0.479557	0.837618	0.725834	0.88783	-1.53968	0.0168493	0.0948627	-1.07537	0.3336	0.798971	-0.53724	0.993005	0.999101	-1.5931	0.00693998	0.0335484	-1.65074	0.00473934	0.0333043
REACTOME PROTEIN LOCALIZATION	1.64934	0.000108921	0.00742983	1.44323	0.00739247	0.243004	0.917078	0.63968	0.994304	1.01572	0.414607	0.856374	1.19965	0.0802318	0.1798	1.08967	0.239252	0.417748	-1.26911	0.0852569	0.340124	-1.58827	0.0019899	0.0228019	-1.83623	0.000392003	0.023756	-1.10472	0.269398	0.638148	-1.94089	0.00011343	0.00781227	-1.43607	0.0100291	0.0616671
REACTOME RHO GTPASE EFFECTORS	0.633577	0.996387	1	0.78185	0.899249	1	-1.01523	0.37989	0.975356	-1.05278	0.297548	0.821329	-1.1323	0.158535	0.297492	1.31169	0.00547303	0.0226553	1.05688	0.309095	0.628772	2.002	0.000307692	0.00730957	1.06244	0.297661	0.768419	1.71598	0.00129366	0.0170559	1.50212	0.00124844	0.0115319	1.77819	0.00013488	0.00292644
REACTOME RHO GTPASES ACTIVATE WASPS AND WAVES	-0.691891	0.932906	1	-0.888935	0.629416	0.991649	-0.731047	0.866035	1	-0.810298	0.751395	0.987545	-1.51668	0.022449	0.0695807	-1.73163	0.00200267	0.0100254	-0.98634	0.465992	0.747091	1.75572	0.00999025	0.0760196	-1.42083	0.0724492	0.45671	1.45192	0.075699	0.318465	2.10909	0.000376364	0.00960416	1.90801	0.00106914	0.0112696
REACTOME SEMAPHORIN INTERACTIONS	1.1324	0.293505	0.859523	1.29736	0.112333	0.56665	-0.915439	0.606096	0.991099	0.844594	0.718268	0.979157	-2.00011	0.000162655	0.00278502	-1.90762	0.000318016	0.00268997	-0.83403	0.750655	0.899671	1.63989	0.0149254	0.0914296	-0.781465	0.837371	0.990798	1.2715	0.142012	0.452282	1.7732	0.00271739	0.0183084	1.7217	0.00395322	0.0291691
REACTOME TRANSLATION	1.4023	0.00174502	0.0423196	0.965366	0.57792	0.976152	1.40218	0.00561457	0.475344	1.53131	0.0014708	0.159417	1.4114	0.000349773	0.00290544	1.34312	0.00407558	0.0178417	-1.18065	0.131685	0.425995	-1.23437	0.0908418	0.253524	-1.58383	0.00152701	0.0614465	1.3379	0.046952	0.251093	-1.65473	0.000106011	0.00781227	0.817335	0.850688	0.987371
HALLMARK CHOLESTEROL HOMEOSTASIS	1.50855	0.00347889	0.0647653	1.23639	0.160143	0.643453	-0.843113	0.765002	1	0.886034	0.647159	0.947746	1.29721	0.0661489	0.1532	1.06396	0.312049	0.493199	1.76932	0.00193673	0.0372047	1.98821	0.000518672	0.00911345	1.00093	0.434966	0.87604	1.60329	0.026054	0.166281	1.8302	0.000516262	0.00960416	1.38481	0.0701502	0.266403
HALLMARK FATTY ACID METABOLISM	1.75417	0.000109782	0.00742983	1.64965	0.000113109	0.0192666	1.07513	0.315375	0.96497	1.03696	0.374446	0.836512	1.09744	0.218807	0.372814	-0.82641	0.867949	0.934142	1.2831	0.0799047	0.331663	-1.20615	0.145186	0.331173	-1.33975	0.0518155	0.3921	-1.12649	0.241379	0.609224	-1.39415	0.0198155	0.0704987	-1.49912	0.00420576	0.0305954
HALLMARK MYC TARGETS V1	0.899901	0.709459	1	0.538547	0.999782	1	0.707306	0.997509	1	0.80511	0.899611	1	1.78074	0.000312891	0.00278502	2.31053	0.000332557	0.00268997	-1.59576	0.00313364	0.0484341	0.74547	0.977632	0.998976	-1.00698	0.423024	0.869677	1.04214	0.354093	0.717856	-1.51739	0.00164636	0.0133173	0.584961	0.99986	1
HALLMARK XENOBIOTIC METABOLISM	1.54352	0.00032471	0.0164864	1.46209	0.00480393	0.19874	1.45295	0.00829214	0.514573	1.57105	0.00250548	0.164622	1.17842	0.0861094	0.188388	-1.11935	0.203274	0.373693	2.00108	0.000218198	0.00950081	0.828297	0.883784	0.951658	1.11922	0.214062	0.649332	1.31738	0.070224	0.30657	1.46183	0.000886525	0.00960416	1.69121	0.000837989	0.00956815
KEGG ANTIGEN PROCESSING AND PRESENTATION	-1.20886	0.184285	0.741914	-1.2427	0.16234	0.643621	0.838596	0.7151	1	0.945074	0.543444	0.908119	0.608211	0.997893	1	-0.745011	0.899537	0.942114	1.48203	0.0575401	0.278214	1.81278	0.00586367	0.0553346	0.734831	0.848147	0.990877	2.16914	0.000456308	0.00789032	1.81807	0.00356577	0.0218307	2.13213	0.000176929	0.00292644
KEGG APOPTOSIS	0.957454	0.564902	1	0.725138	0.883669	1	-0.681745	0.978988	1	-0.72887	0.934683	1	-2.10063	0.000159109	0.00278502	-1.96654	0.000154703	0.00268997	1.20073	0.169807	0.475713	1.28039	0.123578	0.299416	-0.961051	0.516058	0.909065	1.75107	0.00950796	0.0874035	1.36127	0.0386001	0.111857	1.75848	0.00191755	0.0178453
KEGG CARDIAC MUSCLE CONTRACTION	1.47862	0.00857936	0.107676	1.54265	0.00747326	0.243004	1.18564	0.214423	0.963258	1.24211	0.166091	0.703087	-0.84006	0.768281	0.849567	0.976837	0.498085	0.678802	-1.62331	0.0108048	0.106075	-1.60117	0.0134725	0.0880689	-1.80292	0.00178713	0.0637224	-1.73966	0.00780708	0.0745018	-1.60325	0.00692448	0.0335484	-0.719695	0.920438	1
KEGG CELL ADHESION MOLECULES CAMS	0.922227	0.619909	1	0.964472	0.544885	0.967195	0.999284	0.457491	0.991099	0.957635	0.523006	0.90714	-0.891127	0.709046	0.812247	-0.858336	0.783884	0.879251	1.12698	0.239615	0.560093	1.97896	0.000522876	0.00911345	1.2323	0.135069	0.550407	1.72327	0.00895884	0.0831181	1.69792	0.00167038	0.0133173	2.17811	0.000155618	0.00292644
KEGG DILATED CARDIOMYOPATHY	1.09168	0.352984	0.898138	1.28851	0.111015	0.56665	1.03213	0.402125	0.978593	0.831278	0.752863	0.987545	-2.02448	0.000157307	0.00278502	-1.88414	0.000152905	0.00268997	-0.951592	0.536714	0.786948	1.16539	0.232822	0.447275	1.30139	0.096865	0.521334	-0.735926	0.886516	0.987877	1.66598	0.00587947	0.0301813	1.60669	0.0112378	0.06869
KEGG ENDOCYTOSIS	0.78992	0.866732	1	1.02948	0.42975	0.895418	0.847074	0.806565	1	0.888112	0.696292	0.973414	-1.63132	0.000296033	0.00278502	-1.52303	0.00157706	0.00845499	-1.02812	0.383392	0.689251	1.61433	0.00431158	0.0456466	-1.27969	0.0715814	0.453747	1.23428	0.126636	0.42438	1.49686	0.0017452	0.0136328	1.33314	0.0597289	0.243873
KEGG FOCAL ADHESION	0.780347	0.890882	1	0.95027	0.592084	0.978374	-1.09119	0.240374	0.963258	-1.42761	0.0102692	0.301861	-1.94492	0.000147254	0.00278502	-1.83041	0.000142005	0.00268997	1.12103	0.214395	0.529192	1.18773	0.146306	0.332093	-0.726782	0.986526	0.996841	-0.773418	0.910086	0.998089	1.79322	0.000952381	0.00960416	1.70977	0.000420109	0.0056978
KEGG HEMATOPOIETIC CELL LINEAGE	0.955531	0.562598	1	0.871488	0.660312	1	-1.27931	0.132015	0.906723	-1.13805	0.268962	0.808441	-0.699733	0.969354	0.985167	-1.02515	0.409375	0.596658	1.533	0.0232408	0.167486	1.93533	0.000988142	0.0137493	1.46498	0.0367765	0.332843	2.03539	0.0016129	0.0204573	1.98802	0.00130492	0.0115319	2.20612	0.000169722	0.00292644
KEGG LEUKOCYTE TRANSENDOTHELIAL MIGRATION	-0.870203	0.769974	1	1.00358	0.480951	0.927845	1.02483	0.414361	0.979948	1.10331	0.299217	0.821652	-1.32261	0.0473765	0.120472	-1.06381	0.324704	0.507273	1.52803	0.0119991	0.112398	2.21928	0.000264201	0.00730957	0.830647	0.805398	0.988911	1.74744	0.00558931	0.0571478	2.2643	0.000582072	0.00960416	2.22753	0.000152416	0.00292644
KEGG MAPK SIGNALING PATHWAY	0.922519	0.669457	1	0.988063	0.521444	0.956782	1.08085	0.276497	0.963258	1.07977	0.291311	0.821329	-1.55969	0.000425411	0.00340363	-1.36464	0.00931124	0.0341319	1.18117	0.113956	0.395666	1.23234	0.0985369	0.265124	-0.768827	0.977399	0.996841	1.34043	0.0477543	0.253173	1.84966	0.00109409	0.0104374	1.70665	0.000274123	0.0041039
KEGG PANCREATIC CANCER	0.983594	0.523647	1	1.15658	0.255741	0.761768	0.790466	0.83316	1	-1.01665	0.415414	0.856374	-1.5048	0.0116335	0.0423842	-1.51347	0.0126203	0.0431619	1.15624	0.22093	0.534112	1.17353	0.221007	0.433121	-1.20956	0.172229	0.605378	1.16723	0.220574	0.578114	1.66156	0.00480538	0.0260312	1.61195	0.0113988	0.0692644
KEGG PATHOGENIC ESCHERICHIA COLI INFECTION	-1.127	0.257826	0.832024	-0.819478	0.78698	1	0.913648	0.601407	0.991099	1.06577	0.365743	0.835574	-1.61445	0.00580239	0.0251966	-1.6244	0.00468801	0.0199486	0.937296	0.548429	0.796677	1.62757	0.0228839	0.107184	1.31537	0.113764	0.535021	1.48779	0.0598527	0.288329	1.90368	0.00123916	0.0115319	1.78855	0.00172652	0.0166682
KEGG PRIMARY IMMUNODEFICIENCY	-0.413119	0.996837	1	0.265424	1	1	0.939123	0.567592	0.991099	0.623516	0.906179	1	0.959205	0.520601	0.666669	0.723772	0.906008	0.945605	1.46248	0.0655283	0.29952	1.75012	0.0129496	0.0852226	1.21511	0.211324	0.646031	2.03597	0.000904773	0.0131389	1.8225	0.00541822	0.0280829	2.00154	0.000186567	0.00294091
KEGG PRION DISEASES	0.989955	0.516613	1	0.670049	0.901555	1	-0.816516	0.723637	1	-1.11736	0.31363	0.830108	-1.20618	0.191811	0.340451	-1.30815	0.111668	0.242487	1.69221	0.0125934	0.113373	2.02137	0.000488759	0.00911345	1.68896	0.0121176	0.193049	1.86042	0.00794913	0.0751417	1.68849	0.0142228	0.057424	1.98623	0.000367715	0.0051331
KEGG SPLICEOSOME	0.476733	0.999888	1	0.464023	1	1	-1.18654	0.144733	0.922222	-0.57538	1	1	2.20453	0.000287026	0.00278502	2.41385	0.000303398	0.00268997	-1.03531	0.379194	0.687175	-1.47068	0.0208983	0.106678	1.65742	0.00325468	0.0843997	-0.535564	0.998313	0.999101	-1.75188	0.0002331	0.00960416	0.489873	1	1
KEGG SYSTEMIC LUPUS ERYTHEMATOSUS	-0.881062	0.660909	1	0.89425	0.633233	0.991649	-1.55725	0.0139438	0.648966	-1.76852	0.000943841	0.117141	1.2246	0.10255	0.213997	0.900796	0.676759	0.814327	1.59752	0.0154143	0.129164	2.24036	0.0002442	0.00730957	1.74767	0.00440088	0.100428	1.90344	0.00525834	0.0554617	1.91533	0.00225819	0.0162288	2.0777	0.000176929	0.00292644
KEGG VIBRIO CHOLERAE INFECTION	-1.02705	0.389831	0.916771	-1.03978	0.385236	0.86931	1.17364	0.237126	0.963258	1.25986	0.159342	0.703087	-1.70983	0.00198741	0.0103612	-1.56743	0.00858856	0.0318667	1.20319	0.196749	0.510644	1.74506	0.00909538	0.0726139	1.41088	0.0630757	0.420873	1.39938	0.085794	0.337953	1.54143	0.0183824	0.0688062	1.17195	0.2541	0.557082
REACTOME ACTIVATION OF GENE EXPRESSION BY SREBF SREBP	1.54472	0.0019685	0.0458087	1.38784	0.0657246	0.492144	-0.881504	0.652484	0.994304	0.625283	0.963534	1	1.80847	0.000496894	0.00368868	1.52046	0.0213258	0.0665474	1.16853	0.237613	0.557724	1.67432	0.0159784	0.0915466	0.972482	0.4924	0.904645	-0.735117	0.844468	0.96872	-0.694094	0.917781	0.971409	-0.984832	0.475955	0.767022
REACTOME ANTI INFLAMMATORY RESPONSE FAVOURING LEISHMANIA PARASITE INFECTION	0.936751	0.604504	1	0.946464	0.581178	0.977675	1.39386	0.0385265	0.809491	1.36304	0.0583978	0.566548	-1.4962	0.00253278	0.0127991	-1.24464	0.0782418	0.187073	1.1381	0.215028	0.529192	1.81645	0.0025582	0.0283146	1.16028	0.18141	0.619022	1.35434	0.0917759	0.356432	2.27603	0.000545554	0.00960416	1.72337	0.00265211	0.0228511
REACTOME ANTIGEN PRESENTATION FOLDING ASSEMBLY AND PEPTIDE LOADING OF CLASS I MHC	-1.22819	0.219165	0.775097	-1.44509	0.0685661	0.501398	-1.34716	0.11591	0.906723	-1.11689	0.330154	0.830108	-1.80313	0.000858222	0.00527767	-1.86158	0.000338181	0.00268997	NA	NA	NA	1.62691	0.0331174	0.138439	1.37618	0.12004	0.535021	1.73502	0.0222923	0.151951	1.80822	0.00672043	0.0329301	1.77169	0.00440444	0.0313779
REACTOME BASE EXCISION REPAIR	0.72701	0.876444	1	-0.568257	0.998175	1	-0.794023	0.838649	1	-1.12533	0.271773	0.809218	2.39227	0.000265534	0.00278502	2.38046	0.000269324	0.00268997	-0.874133	0.662528	0.870123	-1.63063	0.0100857	0.0761512	1.00245	0.447047	0.879449	-1.10314	0.317424	0.679613	-1.57534	0.0109319	0.0479047	-1.25771	0.131483	0.40184
REACTOME BASE EXCISION REPAIR AP SITE FORMATION	1.05029	0.438832	0.935705	0.422683	0.999012	1	-0.676984	0.914066	1	-1.10009	0.328011	0.830108	1.99864	0.000498629	0.00368868	1.69253	0.00479435	0.02033	-0.70444	0.876339	0.948218	-1.68954	0.00740103	0.0626835	0.91809	0.561267	0.927631	-1.25297	0.207414	0.565502	-1.52796	0.032372	0.0992988	-1.42863	0.0671141	0.262609
REACTOME CLASS I MHC MEDIATED ANTIGEN PROCESSING PRESENTATION	-0.878116	0.953642	1	-0.758241	1	1	-0.939313	0.672403	0.999405	-1.03125	0.340305	0.830108	-1.42404	0.000666578	0.00458871	-1.44283	0.000648172	0.00421832	-1.1464	0.135587	0.42769	-0.864892	0.813507	0.919289	-1.19404	0.0921919	0.508169	1.49295	0.00461831	0.0492292	-0.789295	0.940302	0.981263	1.50929	0.00268233	0.0228996
REACTOME CROSSLINKING OF COLLAGEN FIBRILS	-1.72856	0.00117647	0.0357269	-1.82675	0.00058072	0.0520431	-1.30898	0.158587	0.952377	-1.53255	0.0336099	0.493977	-1.84772	0.000349528	0.00290544	-1.6479	0.0117241	0.0406504	0.994137	0.459621	0.746636	NA	NA	NA	1.28819	0.17323	0.606305	NA	NA	NA	-1.49591	0.0425627	0.121383	NA	NA	NA
REACTOME DAP12 INTERACTIONS	-1.15901	0.270031	0.840454	-0.911418	0.586557	0.978374	-0.749679	0.823791	1	0.755163	0.79368	1	-1.13963	0.25699	0.414242	-1.05441	0.373964	0.558487	1.16213	0.255629	0.573769	1.73748	0.0147485	0.0909183	-0.794579	0.775256	0.978909	2.14922	0.000456725	0.00789032	1.57293	0.0267148	0.0867426	1.85107	0.00237877	0.0210023
REACTOME DISEASES OF SIGNAL TRANSDUCTION BY GROWTH FACTOR RECEPTORS AND SECOND MESSENGERS	0.809703	0.915699	1	0.825767	0.878291	1	-0.921288	0.772595	1	-1.25642	0.0178322	0.398371	-1.51102	0.000261404	0.00278502	-1.38597	0.00177981	0.00921715	1.39641	0.00344195	0.050467	1.13644	0.135599	0.318638	0.92714	0.696924	0.962615	1.30276	0.0321954	0.193732	1.28194	0.00593472	0.0303205	1.23157	0.0803803	0.294878
REACTOME ELASTIC FIBRE FORMATION	-1.3141	0.097817	0.570399	-1.40456	0.0611755	0.481114	-1.05778	0.372125	0.975356	-1.41934	0.0595626	0.566548	-2.09978	0.000166917	0.00278502	-2.13127	0.000163372	0.00268997	1.8804	0.00128949	0.0308672	0.718267	0.869841	0.949804	1.75765	0.00561347	0.120849	-0.920438	0.573101	0.84809	1.21649	0.155779	0.303543	1.78337	0.00316456	0.0251461
REACTOME EPH EPHRIN SIGNALING	0.664843	0.960202	1	0.840873	0.74134	1	-0.929124	0.590296	0.991099	-0.860427	0.740997	0.987545	-1.94331	0.000157431	0.00278502	-1.67625	0.00122231	0.00701673	-1.38396	0.0488259	0.2588	1.72164	0.00620155	0.0554157	-1.16533	0.199921	0.635403	1.08779	0.301075	0.665955	1.80371	0.00054615	0.00960416	1.10583	0.308677	0.615997
REACTOME EPHB MEDIATED FORWARD SIGNALING	-1.33515	0.0893443	0.551384	-1.36344	0.0759593	0.506257	-1.09328	0.322855	0.965007	-1.03661	0.395708	0.84838	-1.80556	0.00050226	0.00368868	-1.67062	0.00394672	0.0174445	-1.53318	0.0328358	0.201476	1.75885	0.00952846	0.0752199	-1.42578	0.0688073	0.448624	1.20223	0.20819	0.565502	2.02026	0.000772798	0.00960416	1.03836	0.402335	0.698508
REACTOME GLYOXYLATE METABOLISM AND GLYCINE DEGRADATION	1.59273	0.000848776	0.0305833	1.54408	0.0126582	0.284007	1.23877	0.203338	0.963258	1.30652	0.14955	0.690278	1.2935	0.11492	0.233834	1.36361	0.079369	0.188656	1.04824	0.39436	0.701154	-1.70798	0.0046028	0.0479826	-1.28029	0.159952	0.588726	-1.31875	0.139522	0.448081	-1.55481	0.0238061	0.0807013	-1.68067	0.00533215	0.0364775
REACTOME GPVI MEDIATED ACTIVATION CASCADE	-1.34802	0.10596	0.582841	-1.2904	0.145339	0.623074	0.887916	0.624683	0.991099	0.953958	0.535479	0.908119	-1.21147	0.187734	0.335123	-0.919245	0.582684	0.751989	1.52537	0.0426581	0.236233	2.15078	0.00024432	0.00730957	0.59297	0.973376	0.996841	1.9069	0.00454649	0.0489847	1.79698	0.00363372	0.0218307	1.93892	0.000897989	0.0100203
REACTOME IMMUNOREGULATORY INTERACTIONS BETWEEN A LYMPHOID AND A NON LYMPHOID CELL	-1.33525	0.0893443	0.551384	-1.22434	0.171887	0.652766	-0.968682	0.504589	0.991099	1.05735	0.373853	0.836512	-1.10063	0.279575	0.439944	-1.00943	0.436086	0.619996	1.43743	0.0503551	0.263198	2.17329	0.000246731	0.00730957	1.20523	0.17801	0.60994	2.21826	0.000232396	0.00586665	2.19248	0.000452899	0.00960416	2.24731	0.000168577	0.00292644
REACTOME INFLAMMASOMES	-0.958059	0.518529	1	-0.941731	0.526713	0.957703	-1.19777	0.270235	0.963258	-1.28175	0.180174	0.726552	-0.898281	0.607621	0.735591	-0.983961	0.480075	0.662532	1.71652	0.0185739	0.144214	1.93513	0.00143369	0.0179028	1.41391	0.0950963	0.51754	2.05813	0.000670841	0.0102557	1.9173	0.00399754	0.0230446	1.84062	0.00114635	0.0117425
REACTOME INFLUENZA INFECTION	-0.577866	1	1	-1.01049	0.407248	0.879801	0.638106	0.998874	1	0.755878	0.934125	1	2.04566	0.000298775	0.00278502	2.06812	0.00030303	0.00268997	1.14257	0.224705	0.54092	1.56789	0.0192462	0.101879	1.10251	0.279542	0.740538	2.16842	0.000239923	0.00586665	1.20582	0.0931373	0.211373	1.67035	0.0038622	0.0291215
REACTOME INTEGRATION OF ENERGY METABOLISM	1.53208	0.00129748	0.0368049	1.33628	0.0665298	0.492144	1.25836	0.120652	0.906723	1.26213	0.124302	0.649385	-1.40681	0.021585	0.0684347	-1.01016	0.43515	0.619389	-1.00442	0.436268	0.730518	1.60983	0.0143791	0.0905368	-0.976103	0.481883	0.897584	-0.854092	0.704252	0.916071	1.69225	0.00165017	0.0133173	0.880369	0.657866	0.880528
REACTOME INTEGRIN CELL SURFACE INTERACTIONS	-1.17928	0.153289	0.676774	-1.08392	0.285486	0.770259	-1.08303	0.302398	0.963258	-1.31019	0.0830508	0.566548	-1.61287	0.00190174	0.00997199	-1.64817	0.00170068	0.00903811	1.35098	0.0753512	0.31862	1.938	0.000758917	0.0111998	0.974531	0.487682	0.901856	1.04806	0.362556	0.717856	1.29499	0.0678643	0.170929	2.10121	0.000162866	0.00292644
REACTOME INTEGRIN SIGNALING	-1.51745	0.0300034	0.284256	-1.11753	0.310492	0.799123	-0.873804	0.645578	0.994304	-0.998528	0.463698	0.876799	-1.80911	0.000858222	0.00527767	-2.02969	0.00016952	0.00268997	1.76027	0.00749465	0.0829555	1.69829	0.0191006	0.101879	1.30686	0.14223	0.560401	1.6568	0.0294588	0.18334	2.05806	0.000677507	0.00960416	1.36616	0.116198	0.377076
REACTOME INTERLEUKIN 3 INTERLEUKIN 5 AND GM CSF SIGNALING	-0.753454	0.873433	1	-1.0625	0.350825	0.839124	0.894583	0.628818	0.994304	0.764547	0.814927	1	-1.41941	0.0403119	0.107095	-1.30151	0.10821	0.239004	1.57841	0.0219544	0.163137	2.09635	0.000246245	0.00730957	0.592624	0.981982	0.996841	1.94071	0.00389372	0.0436708	1.68083	0.0079968	0.0378094	1.81361	0.001755	0.0167863
REACTOME MITOCHONDRIAL FATTY ACID BETA OXIDATION	1.5415	0.0029936	0.0586641	1.37179	0.0831489	0.523866	0.762633	0.817529	1	1.09473	0.341061	0.830108	1.45639	0.0358974	0.0978735	1.02304	0.413541	0.59843	1.32498	0.125456	0.417806	-1.3639	0.106617	0.278115	-0.785618	0.776039	0.978909	-0.929303	0.548848	0.831712	-1.54965	0.0195862	0.0704987	-1.66358	0.00581655	0.0395296
REACTOME MOLECULES ASSOCIATED WITH ELASTIC FIBRES	-1.0181	0.412876	0.916864	-1.13997	0.260902	0.763272	-0.949483	0.535424	0.991099	-1.34182	0.101443	0.601158	-1.87552	0.00016952	0.00278502	-2.01463	0.000165837	0.00268997	1.72239	0.00941176	0.0965989	0.835876	0.684236	0.844672	1.58174	0.0280988	0.28629	-0.969107	0.496703	0.795042	1.27204	0.134093	0.272739	1.77714	0.00381749	0.0289961
REACTOME MRNA SPLICING	-0.390748	1	1	-0.435948	1	1	-0.846498	0.875413	1	-0.420724	1	1	2.31923	0.000310174	0.00278502	2.58073	0.000332557	0.00268997	-1.18466	0.143357	0.44369	-1.40921	0.0212475	0.106678	1.58123	0.00288184	0.0782901	-0.828117	0.81374	0.966645	-1.63125	0.000223314	0.00960416	-0.734312	0.991713	1
REACTOME MYD88 INDEPENDENT TLR4 CASCADE	0.899074	0.66927	1	-0.793507	0.902907	1	0.824452	0.80215	1	0.957143	0.534758	0.908119	-1.65862	0.000625293	0.0043526	-1.5637	0.00395618	0.0174445	1.41109	0.0413882	0.235208	1.15232	0.219068	0.431928	-0.992779	0.449052	0.880423	1.61687	0.0183575	0.135277	1.66619	0.00222717	0.0162288	1.72725	0.0025098	0.0219714
REACTOME NEUROTRANSMITTER RECEPTORS AND POSTSYNAPTIC SIGNAL TRANSMISSION	0.98129	0.539251	1	0.996444	0.499147	0.940215	1.31018	0.0549628	0.81858	1.5126	0.00862344	0.267566	-1.57121	0.000736269	0.00481159	-1.25432	0.0606061	0.154811	-1.79135	0.000551471	0.0163845	1.54721	0.0142115	0.0904708	-1.41186	0.0165544	0.209873	-0.923152	0.595262	0.860618	1.33003	0.0328947	0.0998888	1.07308	0.335752	0.637559
REACTOME NUCLEOTIDE BINDING DOMAIN LEUCINE RICH REPEAT CONTAINING RECEPTOR NLR SIGNALING PATHWAYS	-1.07902	0.309382	0.871379	-1.11077	0.281612	0.769096	-1.14708	0.241636	0.963258	-1.27902	0.127846	0.649385	-1.20628	0.171124	0.315415	-1.30552	0.0934022	0.215693	1.36793	0.0831543	0.339377	1.98395	0.000248077	0.00730957	1.18936	0.205812	0.643502	2.16244	0.00023218	0.00586665	1.67478	0.00894378	0.0413794	1.84219	0.000842886	0.00956815
REACTOME NUCLEOTIDE EXCISION REPAIR	0.432388	1	1	-0.646079	0.999316	1	-0.520047	1	1	0.488	1	1	2.1924	0.000283607	0.00278502	2.17969	0.000297354	0.00268997	-0.952789	0.541846	0.79139	-1.52333	0.0123399	0.0833577	0.85459	0.737269	0.978909	-1.05096	0.363376	0.717856	-1.801	0.000117966	0.00781227	-1.38318	0.0287269	0.139976
REACTOME ONCOGENIC MAPK SIGNALING	-0.934723	0.596735	1	-1.06268	0.316299	0.802635	-1.07785	0.305662	0.963258	-1.02844	0.395501	0.84838	-1.42985	0.0227526	0.0701726	-1.55676	0.00697783	0.0275715	0.946717	0.54818	0.796677	1.64623	0.0114613	0.0803117	1.11198	0.273937	0.731729	0.974853	0.466269	0.779767	1.73012	0.00103252	0.0101187	1.04974	0.385427	0.688833
REACTOME ORC1 REMOVAL FROM CHROMATIN	-0.594512	1	1	-0.770769	0.907295	1	-1.11045	0.270533	0.963258	-1.24696	0.133714	0.649385	1.63645	0.00291236	0.0143359	2.08076	0.000273523	0.00268997	-0.98738	0.465954	0.747091	-1.63895	0.0057255	0.0552143	-0.971711	0.485338	0.90044	1.12017	0.269067	0.638148	-1.48024	0.020058	0.0708936	0.910959	0.599741	0.856891
REACTOME PEPTIDE LIGAND BINDING RECEPTORS	0.717391	0.899439	1	1.16559	0.243385	0.736751	-1.02111	0.403883	0.978605	-1.38836	0.0510618	0.561771	-1.03546	0.369369	0.527768	-0.952323	0.579191	0.749155	-0.874661	0.725297	0.88783	1.95712	0.0017094	0.0203044	-0.694385	0.990274	0.996841	1.90396	0.00553761	0.0571478	1.97944	0.00131464	0.0115319	2.14933	0.000166306	0.00292644
REACTOME PROCESSING OF CAPPED INTRON CONTAINING PRE MRNA	-0.402429	1	1	-0.475392	1	1	-0.773683	0.991155	1	-0.452428	1	1	2.29336	0.000328947	0.00278822	2.642	0.000355745	0.00277527	-1.20388	0.108069	0.386106	-1.36137	0.0220394	0.106678	1.58905	0.00146016	0.0614465	-0.722429	0.976574	0.999101	-1.63264	0.000108684	0.00781227	-0.912741	0.735842	0.92246
REACTOME PURINERGIC SIGNALING IN LEISHMANIASIS INFECTION	-0.937745	0.544759	1	-1.37754	0.10149	0.559785	-1.48407	0.0378688	0.809491	-1.48248	0.0512987	0.561771	-0.833586	0.723433	0.820009	-1.13422	0.282765	0.461293	1.74057	0.0119633	0.112398	1.82913	0.00604449	0.0554157	1.47846	0.0655509	0.432419	2.11832	0.000451162	0.00789032	2.1196	0.000651254	0.00960416	1.9121	0.000746269	0.0089639
REACTOME REGULATED NECROSIS	0.740621	0.849909	1	-1.10931	0.285358	0.770259	-0.9424	0.543595	0.991099	-1.138	0.268201	0.808441	-1.4162	0.0384233	0.10318	-1.57094	0.00858856	0.0318667	1.29763	0.130332	0.424225	1.80639	0.00540806	0.0529204	1.06282	0.3584	0.813519	1.81026	0.0108195	0.0959395	1.36062	0.0629085	0.162627	1.97345	0.000173521	0.00292644
REACTOME REGULATION OF EXPRESSION OF SLITS AND ROBOS	-0.932419	0.681934	1	-1.34325	0.0217597	0.359965	0.610639	0.99968	1	0.713774	0.976426	1	1.79871	0.000304599	0.00278502	1.68303	0.000312012	0.00268997	0.955679	0.524197	0.774263	-1.21713	0.161061	0.351734	1.2683	0.109295	0.535021	1.88643	0.00122549	0.0163725	0.920474	0.6817	0.829427	1.54167	0.0118904	0.0714117
REACTOME RHOC GTPASE CYCLE	0.90572	0.641963	1	1.19104	0.212005	0.706894	-1.38403	0.0513436	0.809491	-1.29876	0.0910624	0.577936	-1.59148	0.00399361	0.0187069	-1.565	0.00725667	0.0282036	1.73994	0.00128617	0.0308672	1.56651	0.0222337	0.106678	1.63741	0.00747173	0.139758	0.7736	0.83278	0.968709	1.46136	0.0174651	0.0663589	1.07442	0.348684	0.65398
REACTOME RIPK1 MEDIATED REGULATED NECROSIS	-1.37341	0.0879917	0.551384	-1.50548	0.0440252	0.432868	-0.685023	0.9027	1	-0.773362	0.780456	0.9985	-1.53544	0.0215385	0.0684347	-1.6051	0.0134812	0.0451974	1.3168	0.144229	0.44369	1.75317	0.0121835	0.0829839	0.811693	0.719466	0.976113	1.78805	0.0151854	0.12076	1.51716	0.0375889	0.110111	1.79506	0.00265453	0.0228511
REACTOME RNA POLYMERASE II TRANSCRIPTION TERMINATION	0.429086	1	1	-0.374755	1	1	-0.831456	0.782085	1	-0.548114	0.998571	1	1.82001	0.000523149	0.00376788	2.13683	0.000265745	0.00268997	-1.25431	0.140819	0.439183	-1.72553	0.0014771	0.0179838	1.47918	0.0453365	0.369493	-0.970416	0.492989	0.791627	-1.79048	0.000510204	0.00960416	-0.956009	0.537979	0.80781
REACTOME S PHASE	0.650929	0.985049	1	0.661628	0.981349	1	-0.747171	0.98613	1	-1.20781	0.107595	0.604626	1.97656	0.000303582	0.00278502	2.32062	0.000316156	0.00268997	-0.957473	0.540782	0.790859	-1.44456	0.0157516	0.0915466	0.965573	0.517551	0.909901	-0.798626	0.862023	0.981323	-1.47709	0.00646552	0.0321685	0.625513	0.997419	1
REACTOME SIGNALING BY BRAF AND RAF1 FUSIONS	-0.994328	0.449328	0.945373	-1.22202	0.138889	0.616923	-1.34236	0.0734877	0.870165	-1.36478	0.0678969	0.566548	-1.55305	0.00809192	0.0323158	-1.53902	0.0100239	0.0359854	1.08955	0.30751	0.626677	1.76362	0.00503398	0.0505474	1.41058	0.0531401	0.394779	0.983309	0.453314	0.779203	1.72517	0.00273473	0.0183108	1.07083	0.360731	0.663241
REACTOME SIGNALING BY MODERATE KINASE ACTIVITY BRAF MUTANTS	-1.17384	0.204098	0.765026	-1.2185	0.177369	0.653429	-1.27833	0.136531	0.913201	-1.29571	0.129903	0.649385	-1.61819	0.00666778	0.0276015	-1.54923	0.0130698	0.0445264	1.08731	0.332262	0.647596	1.78576	0.00639764	0.0566482	0.935035	0.548949	0.927631	0.855415	0.658379	0.884311	2.0948	0.000386548	0.00960416	1.05539	0.382559	0.686082
REACTOME SIGNALING BY NTRKS	0.822634	0.8042	1	0.85499	0.741051	1	1.10734	0.269412	0.963258	0.917143	0.620104	0.938558	-1.56526	0.00167581	0.0090785	-1.51559	0.00329786	0.0150318	1.28658	0.0781724	0.326876	1.53079	0.0170964	0.0957006	-1.33982	0.0535538	0.394779	1.11005	0.259975	0.628428	1.92917	0.000658328	0.00960416	0.771105	0.86363	0.987923
REACTOME SIGNALING BY RECEPTOR TYROSINE KINASES	0.86033	0.860117	1	0.895374	0.77342	1	-1.03549	0.308245	0.963258	-1.12695	0.107623	0.604626	NA	NA	NA	NA	NA	NA	1.33394	0.00489853	0.0621398	1.62619	0.000746826	0.0111909	-1.07861	0.223845	0.663222	1.09417	0.21455	0.574809	1.7717	0.00414938	0.0235423	1.40741	0.00513126	0.0353373
REACTOME SIGNALING BY VEGF	0.70805	0.926615	1	0.801203	0.810094	1	0.76474	0.910023	1	-1.11088	0.247759	0.797529	-1.6947	0.000308356	0.00278502	-1.66406	0.000604138	0.00406208	1.17083	0.190701	0.50304	1.46372	0.0308031	0.134182	-1.46032	0.0258281	0.278017	0.730026	0.930881	0.999101	2.15337	0.000614251	0.00960416	1.67267	0.00288184	0.0240076
REACTOME SMOOTH MUSCLE CONTRACTION	1.26968	0.150594	0.670175	1.55621	0.00935737	0.262142	0.834461	0.721714	1	0.916682	0.583993	0.924058	-1.88052	0.00016952	0.00278502	-1.71206	0.00315091	0.0145252	1.40022	0.0879402	0.344738	-0.833016	0.685514	0.845178	0.842336	0.691101	0.960889	0.567549	0.970394	0.999101	2.08459	0.000727537	0.00960416	1.67379	0.0125432	0.0744661
REACTOME SYNTHESIS OF DNA	-0.719326	0.993843	1	-1.07224	0.273188	0.763272	-1.10312	0.250063	0.963258	-1.29667	0.063278	0.566548	1.92702	0.000286205	0.00278502	2.35302	0.000303674	0.00268997	-0.902999	0.644265	0.858052	-1.50286	0.015387	0.0915466	0.888981	0.671426	0.960055	-0.733826	0.930439	0.999101	-1.41546	0.0235793	0.0804384	0.671081	0.974271	1
REACTOME TOLL LIKE RECEPTOR TLR1 TLR2 CASCADE	0.995545	0.506787	1	0.64033	0.973306	1	0.754636	0.911849	1	1.00159	0.457114	0.876799	-1.23713	0.107143	0.221026	-1.16498	0.182081	0.349785	1.71278	0.00193632	0.0372047	1.31345	0.0883784	0.250234	-0.673883	0.978941	0.996841	1.94424	0.000968523	0.0138637	1.70455	0.00167598	0.0133173	1.78246	0.000780762	0.00927043
REACTOME TRANSCRIPTION COUPLED NUCLEOTIDE EXCISION REPAIR TC NER	-0.793625	0.906307	1	-1.07811	0.291667	0.77694	-0.537225	0.999758	1	-0.549353	0.999514	1	1.91708	0.000267523	0.00278502	2.0162	0.000280112	0.00268997	-1.0816	0.317671	0.635906	-1.62679	0.00618691	0.0554157	-0.949869	0.523866	0.918174	-1.06697	0.349267	0.715019	-1.82276	0.000495233	0.00960416	-1.19708	0.155592	0.43847
REACTOME NERVOUS SYSTEM DEVELOPMENT	NA	NA	NA	NA	NA	NA	NA	NA	NA	NA	NA	NA	NA	NA	NA	NA	NA	NA	-1.13252	0.13436	0.42769	1.40548	0.0065123	0.057144	-1.09984	0.190388	0.625087	1.48536	0.00254741	0.0300295	1.24321	0.0052356	0.0276523	1.39205	0.00722195	0.046755
REACTOME RHO GTPASES ACTIVATE NADPH OXIDASES	NA	NA	NA	NA	NA	NA	NA	NA	NA	NA	NA	NA	-0.859901	0.683474	0.794411	0.815375	0.749032	0.857546	1.28548	0.164603	0.469349	1.78671	0.00957625	0.0752199	-0.47573	0.991973	0.996841	2.06593	0.000450248	0.00789032	1.70588	0.0190565	0.07024	1.95001	0.000197355	0.00299806
HALLMARK BILE ACID METABOLISM	1.65972	0.000117661	0.00742983	1.58644	0.00132116	0.0776705	0.887224	0.666329	0.99504	1.02131	0.423557	0.857346	1.70468	0.000566733	0.00401221	0.815853	0.899287	0.942114	1.39349	0.0416217	0.235208	-1.27489	0.104348	0.274689	0.814935	0.82842	0.990798	-0.608544	0.989818	0.999101	-0.91462	0.629421	0.783828	-0.973451	0.499273	0.782709
HALLMARK E2F TARGETS	-1.03352	0.301887	0.868496	-1.05944	0.272277	0.763272	-1.31408	0.0307434	0.809491	-1.61629	0.000841043	0.117141	2.66119	0.000312891	0.00278502	2.96212	0.000336814	0.00268997	-1.00841	0.418725	0.71845	-0.798022	0.896733	0.961303	1.14888	0.177593	0.60994	-1.33388	0.0487403	0.255695	-1.63806	0.000111844	0.00781227	-0.952167	0.594663	0.853176
HALLMARK ESTROGEN RESPONSE EARLY	1.20714	0.1265	0.625758	1.18926	0.159234	0.643453	1.24323	0.0874585	0.888101	1.09504	0.268433	0.808441	1.27728	0.0269086	0.079829	1.25275	0.0385265	0.108284	1.72544	0.000219202	0.00950081	1.15026	0.189695	0.393112	1.2776	0.0596263	0.407032	-1.01773	0.412458	0.752483	1.67432	0.000884173	0.00960416	1.07228	0.32545	0.629086
HALLMARK ESTROGEN RESPONSE LATE	1.37727	0.0106808	0.129708	1.42426	0.00788188	0.243004	0.971894	0.512079	0.991099	0.958954	0.541349	0.908119	1.27878	0.0263985	0.0790679	1.06296	0.281429	0.460348	1.12584	0.205464	0.524818	1.09239	0.266456	0.484761	0.784524	0.950241	0.995291	1.56469	0.011236	0.0978994	1.3882	0.00949914	0.0435748	0.965028	0.519633	0.792891
HALLMARK G2M CHECKPOINT	-1.4849	0.00361664	0.0659517	-1.2736	0.034188	0.429079	-1.2698	0.0487329	0.809491	-1.66585	0.000559441	0.117141	2.1955	0.000312793	0.00278502	2.44758	0.000335345	0.00268997	-0.992883	0.457689	0.745644	-0.717565	0.971906	0.998976	1.31633	0.0430175	0.358269	-0.872778	0.725461	0.920142	-1.09767	0.274328	0.45778	-0.67655	0.999289	1
HALLMARK HEME METABOLISM	1.39842	0.00723464	0.100636	1.05524	0.380762	0.864453	1.07793	0.303642	0.963258	1.20052	0.144573	0.683624	-1.31801	0.0288066	0.0840586	-1.4985	0.00185344	0.00951419	1.55726	0.00219974	0.0400565	-1.09513	0.276911	0.493074	1.1617	0.161477	0.589799	1.00483	0.418634	0.755804	-0.769767	0.923483	0.972861	-1.01986	0.392603	0.695233
HALLMARK MITOTIC SPINDLE	-1.42263	0.00560748	0.0881599	-1.08829	0.221271	0.718487	-1.27006	0.0474993	0.809491	-1.38903	0.0128671	0.342204	-1.14887	0.155768	0.293182	1.34044	0.0104765	0.0372805	1.25139	0.0692172	0.307662	0.920019	0.642042	0.818173	1.04662	0.339047	0.799282	0.72307	0.983389	0.999101	1.43822	0.00207469	0.0158618	1.15274	0.199201	0.50051
HALLMARK PI3K AKT MTOR SIGNALING	1.05886	0.399489	0.916864	0.899458	0.656436	1	0.872164	0.697252	1	0.825855	0.784887	0.99854	-1.54623	0.00293165	0.0143359	-1.48869	0.00907853	0.0333794	1.34408	0.060107	0.286332	1.19211	0.182066	0.382182	-1.15282	0.211758	0.646031	1.27285	0.122725	0.41862	1.51345	0.00780781	0.0370785	1.45235	0.0352382	0.163234
HALLMARK SPERMATOGENESIS	0.950775	0.580706	1	0.707615	0.912281	1	-0.765956	0.921231	1	0.710549	0.9396	1	1.92244	0.00029163	0.00278502	1.7869	0.00030021	0.00268997	-1.06029	0.331793	0.647596	-1.58948	0.00884956	0.0712353	-0.792823	0.881329	0.992947	-1.27308	0.12568	0.42438	-1.31625	0.0834066	0.196963	-1.36011	0.0476058	0.205761
HALLMARK TGF BETA SIGNALING	0.852941	0.711841	1	-0.940596	0.548106	0.967195	0.879905	0.662625	0.994986	0.878013	0.649409	0.947746	-1.51509	0.0157558	0.0540818	-1.29751	0.101067	0.227355	1.37773	0.0761312	0.320575	1.60483	0.0216461	0.106678	-0.720384	0.902955	0.99347	1.44459	0.0697188	0.30657	1.84222	0.00217486	0.0162288	1.9374	0.000338123	0.00478468
KEGG AXON GUIDANCE	-1.02974	0.372359	0.905656	0.930401	0.612427	0.983877	-0.902567	0.666329	0.99504	0.935928	0.578229	0.923402	-1.61509	0.000763942	0.00490387	-1.48513	0.00566657	0.0232196	-1.30371	0.0676678	0.303006	1.12792	0.245566	0.462261	-1.33106	0.0579996	0.401076	-1.15621	0.217304	0.577851	1.71396	0.00129282	0.0115319	1.35286	0.0659898	0.259192
KEGG B CELL RECEPTOR SIGNALING PATHWAY	-1.10454	0.273256	0.840591	-1.103	0.273164	0.763272	-0.688993	0.964294	1	0.752986	0.866425	1	-1.36591	0.0463777	0.118903	-1.27025	0.102999	0.230847	1.13287	0.247429	0.565963	1.82219	0.00282051	0.0308672	0.897995	0.631389	0.95368	1.61865	0.0244879	0.161427	2.01165	0.000514668	0.00960416	2.05237	0.000163052	0.00292644
KEGG BASAL TRANSCRIPTION FACTORS	0.469083	0.996838	1	0.439356	0.998039	1	0.51777	0.992477	1	0.65951	0.912179	1	1.76645	0.0026725	0.0133732	1.91543	0.00024975	0.00268997	-0.906967	0.584477	0.817068	-1.06865	0.385045	0.620917	0.939317	0.533055	0.920583	-1.32137	0.136649	0.446002	-1.56966	0.0167312	0.0645154	-1.26876	0.159737	0.444768
KEGG CALCIUM SIGNALING PATHWAY	0.872661	0.729157	1	1.27666	0.090993	0.543525	0.986387	0.478836	0.991099	1.05372	0.353419	0.83383	-1.23778	0.0755108	0.171066	-1.34441	0.0250507	0.0765997	-1.25755	0.0811557	0.335622	1.2917	0.0997012	0.266783	-0.838736	0.824503	0.990798	-0.749931	0.91281	0.998511	1.38739	0.0162086	0.0635377	1.67674	0.00296868	0.0243385
KEGG CHRONIC MYELOID LEUKEMIA	0.875478	0.688905	1	1.05685	0.404253	0.878502	1.06223	0.355865	0.965007	0.954187	0.527934	0.908119	-1.78369	0.000319489	0.00278822	-1.63319	0.00174051	0.00913742	1.19527	0.179734	0.493723	0.919104	0.574441	0.783621	0.876813	0.671615	0.960055	1.26155	0.142185	0.452282	1.44588	0.0197628	0.0704987	1.304	0.120662	0.385118
KEGG CITRATE CYCLE TCA CYCLE	1.59598	0.000696864	0.0268413	1.52652	0.0164656	0.31173	1.38706	0.0722543	0.870165	1.39351	0.0831817	0.566548	0.868835	0.676471	0.790696	0.893357	0.623858	0.783524	1.45599	0.0763815	0.320575	-1.19962	0.241391	0.458314	-1.87987	0.00241012	0.0723671	-1.47776	0.0579762	0.284765	-1.93687	0.000139782	0.00793079	-1.47624	0.0412167	0.184315
KEGG CYSTEINE AND METHIONINE METABOLISM	1.5165	0.00506757	0.0844847	1.27055	0.176049	0.653312	1.20671	0.231661	0.963258	1.45836	0.0564546	0.566548	1.6706	0.00679777	0.0278619	1.71731	0.00448766	0.019367	0.594261	0.958672	0.981093	-0.523541	0.984774	0.998976	-1.09455	0.329725	0.798185	-1.1842	0.250756	0.625018	-0.809854	0.736977	0.863443	-1.02067	0.431122	0.724145
KEGG CYTOSOLIC DNA SENSING PATHWAY	-1.62163	0.00848111	0.107676	-1.66551	0.00633619	0.226664	-0.834367	0.717509	1	-1.03395	0.403742	0.854364	-1.0998	0.304463	0.466045	-1.23862	0.153884	0.309548	1.33306	0.117975	0.401612	1.9211	0.00146128	0.0179838	1.34791	0.103914	0.531231	1.99171	0.00206138	0.0251891	0.957601	0.511878	0.682927	1.77468	0.00336164	0.0259147
KEGG ECM RECEPTOR INTERACTION	-1.06193	0.311262	0.871379	0.870126	0.690406	1	-1.23105	0.132446	0.906723	-1.38803	0.0441141	0.539911	-1.65365	0.0017502	0.00935943	-1.70215	0.000930377	0.00566134	1.06736	0.33312	0.647596	1.40448	0.0717	0.220364	1.2503	0.130216	0.544235	-0.901284	0.600521	0.860618	1.10954	0.240078	0.418558	1.70498	0.00309446	0.0247797
KEGG EPITHELIAL CELL SIGNALING IN HELICOBACTER PYLORI INFECTION	-0.885619	0.680962	1	0.780384	0.806871	1	1.27686	0.123615	0.906723	1.18121	0.220395	0.772594	-1.85647	0.000161134	0.00278502	-1.67786	0.00142225	0.00779675	0.929106	0.575151	0.814737	1.05785	0.346846	0.573261	-1.05819	0.349355	0.808319	1.53672	0.0417946	0.23268	1.55296	0.0131341	0.0557422	1.45592	0.0447373	0.194994
KEGG GNRH SIGNALING PATHWAY	0.863505	0.715134	1	-0.88784	0.701987	1	0.959084	0.529995	0.991099	0.844279	0.736726	0.987429	-1.61511	0.00125865	0.00722824	-1.63284	0.0019805	0.0100011	0.871425	0.706644	0.882454	-0.838142	0.743241	0.876404	0.73068	0.937841	0.994678	-1.01969	0.414328	0.752483	1.49219	0.0139391	0.0573819	1.24876	0.15619	0.43847
KEGG HYPERTROPHIC CARDIOMYOPATHY HCM	1.10303	0.336543	0.884325	1.43253	0.0298303	0.421777	1.0269	0.414503	0.979948	0.807783	0.788677	0.998812	-1.92058	0.000158278	0.00278502	-1.85516	0.000461609	0.00342548	-0.80593	0.824159	0.924008	1.22972	0.181841	0.382182	1.08244	0.313367	0.785828	-0.709499	0.910208	0.998089	1.56308	0.0105844	0.0469549	1.39868	0.0689767	0.264872
KEGG INTESTINAL IMMUNE NETWORK FOR IGA PRODUCTION	-1.19929	0.239567	0.798794	-1.12547	0.306642	0.795215	-0.847999	0.672831	0.999405	0.814508	0.708101	0.978893	-1.04634	0.392935	0.548261	-1.37153	0.0699541	0.173037	1.59835	0.0240086	0.169411	NA	NA	NA	1.51545	0.0418493	0.353704	1.92003	0.00447828	0.0487743	2.01283	0.00168011	0.0133173	1.91998	0.000191058	0.00294572
KEGG NOD LIKE RECEPTOR SIGNALING PATHWAY	-1.33734	0.0763734	0.518498	-1.10052	0.302122	0.787948	0.763116	0.845694	1	0.758294	0.843842	1	-1.17189	0.201805	0.34972	-1.27975	0.110663	0.242172	1.18397	0.21421	0.529192	1.32836	0.123031	0.298835	1.31778	0.106651	0.535021	1.98153	0.00186003	0.0230093	1.77731	0.00386548	0.0224032	1.82061	0.00068271	0.00849687
KEGG RENAL CELL CARCINOMA	1.07006	0.383708	0.913864	0.997908	0.493647	0.933235	-0.8026	0.83858	1	-1.01427	0.4197	0.857346	-1.40826	0.0332849	0.0925735	-1.41789	0.0337699	0.0971584	0.880929	0.656958	0.867492	-0.844764	0.722068	0.86506	0.786312	0.837615	0.990798	-1.08426	0.329357	0.693276	1.64513	0.006917	0.0335484	0.846978	0.699319	0.906394
KEGG RNA DEGRADATION	0.872764	0.683031	1	0.614016	0.971267	1	0.420846	1	1	0.498908	0.998618	1	1.422	0.0324476	0.091145	1.77077	0.00184065	0.00949184	-1.05395	0.367267	0.679744	-1.32008	0.109109	0.280279	0.619103	0.981779	0.996841	-1.07434	0.351507	0.717331	-1.54671	0.0129344	0.0551118	-0.796465	0.834072	0.982567
KEGG TIGHT JUNCTION	1.03858	0.429393	0.933246	1.32708	0.0615929	0.481114	0.985155	0.4801	0.991099	1.05215	0.370758	0.836149	1.119	0.193586	0.341627	1.42437	0.00821668	0.031055	-0.972482	0.50315	0.76147	1.6039	0.00984144	0.0760196	1.34465	0.0518744	0.3921	0.716209	0.943471	0.999101	1.44282	0.016129	0.0634566	1.24134	0.148843	0.428286
KEGG VASCULAR SMOOTH MUSCLE CONTRACTION	1.18946	0.197046	0.764061	1.34336	0.0614298	0.481114	1.12166	0.263025	0.963258	1.22855	0.147974	0.688695	-1.55625	0.00293391	0.0143359	-1.42134	0.0183763	0.0588524	0.879557	0.697434	0.879857	-0.87269	0.679784	0.842379	-1.01976	0.397885	0.850074	-1.21135	0.17621	0.519202	1.59985	0.00445434	0.0247515	1.33798	0.0867187	0.307961
KEGG VASOPRESSIN REGULATED WATER REABSORPTION	-1.11478	0.27096	0.840591	-1.08853	0.31267	0.801919	-0.582442	0.986548	1	-0.529328	0.996323	1	-1.89862	0.000167308	0.00278502	-1.88128	0.000490998	0.00351802	1.06021	0.367083	0.679744	1.28237	0.151641	0.338709	-0.638101	0.953619	0.995291	1.04836	0.366867	0.718413	1.81241	0.00296956	0.0195194	0.872861	0.633345	0.868614
KEGG VEGF SIGNALING PATHWAY	-1.24637	0.125767	0.625758	-1.39084	0.0532067	0.467187	0.922075	0.591769	0.991099	0.629214	0.978238	1	-1.49044	0.0127939	0.0460727	-1.32691	0.0668865	0.166805	-0.818607	0.788669	0.910456	1.17651	0.224012	0.43725	-1.39141	0.0576501	0.401076	0.839143	0.716035	0.919001	2.08271	0.000451264	0.00960416	1.61024	0.0132072	0.0775175
REACTOME ACTIVATION OF ATR IN RESPONSE TO REPLICATION STRESS	-1.22299	0.180523	0.73593	-1.32894	0.103473	0.559785	-1.19688	0.221921	0.963258	-1.41025	0.069113	0.566548	2.2634	0.000243724	0.00278502	2.50145	0.000252334	0.00268997	-1.20819	0.194117	0.506138	-1.20532	0.226517	0.439498	-1.08373	0.341493	0.803388	-1.14623	0.282791	0.649899	-1.52559	0.0239011	0.0807692	-1.39777	0.0615213	0.245695
REACTOME ACTIVATION OF NMDA RECEPTORS AND POSTSYNAPTIC EVENTS	0.90427	0.648452	1	1.04963	0.408752	0.879801	1.18253	0.200546	0.963258	1.49072	0.0165652	0.37762	-1.6707	0.00125885	0.00722824	-1.51158	0.00841751	0.0314236	-2.01546	0.000375094	0.0137448	1.18335	0.215667	0.430449	-1.27225	0.1154	0.535021	-1.09594	0.306743	0.671084	1.22071	0.117589	0.250022	-0.823183	0.793165	0.957512
REACTOME ADORA2B MEDIATED ANTI INFLAMMATORY CYTOKINES PRODUCTION	1.01373	0.479428	0.977215	1.07257	0.375378	0.857644	1.36366	0.0627274	0.854259	1.41043	0.0491041	0.558361	-1.3934	0.0190985	0.0627884	-1.22234	0.109789	0.240744	-0.80467	0.844802	0.93382	1.73117	0.0119658	0.0826575	0.810232	0.843457	0.990798	-1.00055	0.458749	0.779203	1.69265	0.00525855	0.0276523	1.22255	0.198231	0.50051
REACTOME ASPARAGINE N LINKED GLYCOSYLATION	-0.991133	0.466431	0.961261	-0.993047	0.466667	0.918542	1.30469	0.0287443	0.809491	1.33664	0.0253033	0.42824	-2.03187	0.000138562	0.00278502	-2.24207	0.000134336	0.00268997	-1.03758	0.350663	0.660933	0.801539	0.957378	0.996093	-1.12585	0.18959	0.625087	-1.01711	0.407914	0.752221	1.25751	0.00770416	0.0368618	-1.02484	0.36992	0.67276
REACTOME CDT1 ASSOCIATION WITH THE CDC6 ORC ORIGIN COMPLEX	0.936803	0.593433	1	-0.359938	1	1	-0.457834	1	1	-0.460626	1	1	1.17197	0.187065	0.33489	1.51432	0.0165659	0.0537618	-1.13326	0.265868	0.580904	-1.61081	0.011113	0.0796008	-1.31326	0.118719	0.535021	1.38925	0.0814063	0.328908	-1.46377	0.0253181	0.0836356	1.10895	0.315535	0.621701
REACTOME CELL CELL COMMUNICATION	1.10932	0.304662	0.868496	1.46191	0.0101379	0.262142	-0.889368	0.686922	1	0.893523	0.65985	0.952265	-1.13326	0.211306	0.362655	-0.905233	0.678891	0.814327	0.894142	0.677918	0.877717	1.63496	0.00991691	0.0760196	-0.739562	0.948571	0.995291	-0.859138	0.696939	0.911773	1.5113	0.00671141	0.0329301	1.75659	0.00121858	0.0123411
REACTOME CELL CYCLE CHECKPOINTS	-0.954675	0.666667	1	-1.14381	0.104205	0.559785	-1.00463	0.413043	0.979948	-1.38461	0.00848485	0.267566	1.88769	0.000345781	0.00290544	2.35847	0.000375657	0.00291194	0.892005	0.754592	0.90155	-1.08318	0.28882	0.5087	-0.857608	0.823302	0.990798	0.800153	0.91974	0.999101	-1.30692	0.0290438	0.0920861	-0.720575	0.998835	1
REACTOME CELL EXTRACELLULAR MATRIX INTERACTIONS	-1.03315	0.430279	0.933246	0.73377	0.811139	1	0.649307	0.895172	1	-0.720711	0.825894	1	-2.0546	0.000174764	0.00278502	-1.85313	0.000862069	0.00529868	1.59474	0.0421481	0.235772	NA	NA	NA	1.07588	0.373309	0.82708	0.494199	0.982759	0.999101	1.73578	0.0140581	0.0573821	1.60624	0.0303783	0.145957
REACTOME CELLULAR RESPONSE TO STARVATION	0.706951	0.94977	1	0.660808	0.980129	1	1.38815	0.0194471	0.701239	1.40267	0.0273129	0.455351	1.80773	0.00029985	0.00278502	1.33775	0.0264185	0.0795824	1.5443	0.0103739	0.103915	1.37497	0.0637386	0.204889	1.38365	0.0469417	0.371948	2.21883	0.000241429	0.00586665	1.2723	0.0444444	0.125422	1.38674	0.0555385	0.230407
REACTOME CHEMOKINE RECEPTORS BIND CHEMOKINES	0.619114	0.932951	1	1.24231	0.202449	0.687341	0.965435	0.528045	0.991099	-1.09706	0.34693	0.830108	-0.837084	0.754093	0.841586	-0.853598	0.71452	0.839354	0.645678	0.93861	0.97398	NA	NA	NA	1.05222	0.380091	0.837228	1.96594	0.00291088	0.0335253	2.11552	0.000672043	0.00960416	1.94608	0.000568828	0.00734499
REACTOME CHONDROITIN SULFATE BIOSYNTHESIS	0.969043	0.54652	1	0.904577	0.609068	0.983877	-1.45411	0.0542261	0.818521	-1.00467	0.466469	0.876799	-1.87339	0.000174795	0.00278502	-1.64193	0.0114923	0.0400748	1.16197	0.267477	0.581852	NA	NA	NA	1.91112	0.00158322	0.0614465	NA	NA	NA	1.48029	0.0589837	0.155463	NA	NA	NA
REACTOME CHONDROITIN SULFATE DERMATAN SULFATE METABOLISM	-1.02001	0.400439	0.916864	-1.18214	0.194676	0.673228	-1.26459	0.139735	0.918141	-1.00404	0.445749	0.875008	-2.01867	0.000165371	0.00278502	-1.76374	0.00113434	0.00666903	0.897658	0.622828	0.841115	-0.862245	0.653918	0.825021	-1.08948	0.311774	0.784244	-0.74705	0.812422	0.966645	1.61826	0.0139104	0.0573819	0.983905	0.473277	0.763899
REACTOME CHROMATIN MODIFYING ENZYMES	-0.800905	0.993258	1	-0.644742	1	1	-1.43081	0.00423849	0.430399	-1.33862	0.0191749	0.40412	1.92778	0.000328731	0.00278822	1.95139	0.000349773	0.00275882	-0.901447	0.70737	0.882454	0.742839	0.9788	0.998976	1.54221	0.00166945	0.0614465	-1.10583	0.26335	0.631284	-1.18143	0.142353	0.285235	-1.0487	0.321353	0.62861
REACTOME CHROMOSOME MAINTENANCE	-0.794632	0.937112	1	-1.0546	0.318091	0.802635	-1.21262	0.135513	0.911855	-1.29619	0.0700958	0.566548	2.60323	0.000287356	0.00278502	2.62092	0.000301296	0.00268997	-0.820957	0.80045	0.914764	-1.5537	0.0111705	0.0796008	1.00197	0.444378	0.878743	-0.935716	0.549436	0.831712	-1.32019	0.0746047	0.18328	-0.923707	0.626048	0.868287
REACTOME CITRIC ACID CYCLE TCA CYCLE	1.56528	0.00130189	0.0368049	1.45987	0.0418625	0.432868	0.969581	0.523792	0.991099	1.04218	0.425682	0.857346	-1.0559	0.383826	0.540392	-1.11748	0.304214	0.485865	0.800177	0.725448	0.88783	-0.935805	0.550412	0.766028	-2.045	0.000201979	0.0141838	-1.39063	0.102859	0.377527	-1.66793	0.00598717	0.0304442	-0.659138	0.917863	1
REACTOME CLASS A 1 RHODOPSIN LIKE RECEPTORS	0.891893	0.696672	1	1.35613	0.0400139	0.432868	1.07385	0.324922	0.965007	-0.996545	0.44917	0.876298	-1.2221	0.0504619	0.124753	-1.23303	0.0540468	0.141756	-0.992982	0.460557	0.747082	1.87499	0.00177485	0.0208277	-0.651501	1	1	1.68227	0.017819	0.134245	2.04668	0.000610128	0.00960416	1.98605	0.000152416	0.00292644
REACTOME COPI INDEPENDENT GOLGI TO ER RETROGRADE TRAFFIC	-0.772679	0.870763	1	0.650332	0.933537	1	1.11386	0.308972	0.963258	1.47996	0.0367711	0.498908	-1.79418	0.000830427	0.00525234	-1.82438	0.000489556	0.00351802	-1.06738	0.356904	0.670456	1.17668	0.238945	0.456021	0.87251	0.657578	0.960055	-0.934063	0.54719	0.831712	1.69756	0.00772798	0.0368618	0.897185	0.595596	0.85333
REACTOME COSTIMULATION BY THE CD28 FAMILY	0.778139	0.799662	1	-1.28353	0.117429	0.567827	-0.856887	0.707667	1	-1.13173	0.2768	0.815794	-1.29449	0.094843	0.201956	-0.928494	0.579791	0.749155	0.886008	0.640822	0.858052	1.6564	0.0140951	0.0904708	-0.707077	0.919679	0.99347	1.7048	0.0173995	0.133086	1.84845	0.00219106	0.0162288	1.85263	0.000841751	0.00956815
REACTOME CRISTAE FORMATION	1.57516	0.00138389	0.0368049	1.43446	0.0489975	0.452315	1.30353	0.131541	0.906723	1.37347	0.0968505	0.590156	0.908755	0.604629	0.734276	0.79853	0.776405	0.87733	-1.66216	0.015428	0.129164	-1.52921	0.034933	0.141101	-2.0497	0.000200682	0.0141838	-1.68174	0.0161835	0.126687	-1.80865	0.000992908	0.00991069	-1.19145	0.23072	0.540438
REACTOME DAG AND IP3 SIGNALING	1.23589	0.184648	0.741914	-0.969373	0.489068	0.929846	-1.12562	0.284512	0.963258	-0.987074	0.474093	0.876799	-1.86707	0.00016787	0.00278502	-1.56109	0.0147808	0.0488809	-1.18836	0.212087	0.529192	1.05143	0.373836	0.603842	-0.741428	0.849318	0.990877	-0.501731	0.994875	0.999101	1.52692	0.0228063	0.0780484	1.31084	0.141174	0.418755
REACTOME DAP12 SIGNALING	-1.14657	0.294176	0.859523	-0.906938	0.586756	0.978374	-0.739608	0.825729	1	0.783678	0.752297	0.987545	-1.0194	0.427795	0.583311	-1.03758	0.407	0.596219	1.16371	0.255032	0.573568	1.73748	0.0147485	0.0909183	-0.845781	0.678894	0.960889	2.14922	0.000456725	0.00789032	1.22924	0.169319	0.320784	1.84707	0.00183857	0.0172659
REACTOME DEATH RECEPTOR SIGNALLING	-0.996784	0.446766	0.943361	0.701284	0.946014	1	-0.965831	0.51725	0.991099	0.797621	0.861209	1	-1.66516	0.000456621	0.00360095	-1.51749	0.00269099	0.0127429	1.30586	0.0673452	0.303006	1.32397	0.0719465	0.220364	0.846764	0.797319	0.983909	1.32023	0.0949445	0.362441	1.53127	0.00219459	0.0162288	1.41203	0.0430464	0.190029
REACTOME DEGRADATION OF THE EXTRACELLULAR MATRIX	-1.10388	0.221831	0.775097	1.04939	0.401742	0.877572	-1.16508	0.17278	0.960629	-1.23991	0.0946192	0.590156	-1.54565	0.00149858	0.00829878	-1.72871	0.000295989	0.00268997	1.37388	0.0405785	0.232554	1.56906	0.0210992	0.106678	1.32331	0.0599312	0.407032	-0.820982	0.773799	0.95198	-1.09434	0.305702	0.495972	1.60424	0.00734057	0.0470982
REACTOME DNA DAMAGE RECOGNITION IN GG NER	0.827768	0.73204	1	0.547479	0.983444	1	-0.425158	0.999773	1	0.377586	1	1	1.80067	0.000976801	0.00593704	1.64308	0.00984103	0.0357508	-0.734343	0.862657	0.944655	-1.35996	0.0979633	0.265124	-0.942539	0.532381	0.920583	-0.935918	0.550568	0.83208	-1.52351	0.0210782	0.0735254	-1.30389	0.115551	0.376545
REACTOME DNA DAMAGE TELOMERE STRESS INDUCED SENESCENCE	-0.93522	0.554661	1	-0.696955	0.946753	1	0.967745	0.522208	0.991099	0.831243	0.724041	0.979157	1.76687	0.00128766	0.00735977	1.37069	0.0540329	0.141756	0.474119	0.995684	0.998124	-1.66561	0.00879716	0.0712353	1.08457	0.336716	0.798971	-1.08648	0.355017	0.717856	-1.70775	0.00344685	0.0214869	0.805657	0.727766	0.920174
REACTOME DNA DOUBLE STRAND BREAK REPAIR	-1.0356	0.337363	0.884325	-0.926819	0.637521	0.993069	-1.09711	0.248031	0.963258	-1.13659	0.190412	0.750108	2.22032	0.000301205	0.00278502	2.31298	0.000308166	0.00268997	-1.01906	0.39725	0.702971	-1.40931	0.0333645	0.138876	0.942442	0.563434	0.927631	-1.20899	0.163816	0.488523	-1.71278	0.000582751	0.00960416	-1.30693	0.0523077	0.220546
REACTOME DNA DOUBLE STRAND BREAK RESPONSE	-0.894811	0.649833	1	0.446081	0.999611	1	-1.00258	0.437122	0.980017	-0.90352	0.616276	0.937725	1.62764	0.00549307	0.0244442	1.4726	0.0236262	0.0729775	-0.823634	0.747368	0.898363	-1.35439	0.0982533	0.265124	0.977551	0.480939	0.897584	-0.831793	0.701211	0.916054	-1.56724	0.0116341	0.0505709	-0.794811	0.813635	0.97016
REACTOME DUAL INCISION IN TC NER	-0.567328	0.998929	1	-0.937961	0.553869	0.972029	-0.555291	0.999527	1	-0.489897	1	1	1.87803	0.000261575	0.00278502	1.95615	0.000269324	0.00268997	-0.97558	0.489609	0.758571	-1.35963	0.0872007	0.249072	0.852575	0.690138	0.960889	-0.771212	0.814135	0.966645	-1.68233	0.00204082	0.0157143	-0.97312	0.502848	0.783472
REACTOME ECM PROTEOGLYCANS	0.889442	0.667961	1	1.02183	0.454726	0.910267	-1.35779	0.0655426	0.854259	-1.52884	0.0148788	0.361296	-1.73768	0.000795798	0.005059	-1.80397	0.000624415	0.00415253	0.873796	0.680523	0.878069	1.02694	0.399213	0.627151	1.43062	0.0401858	0.347363	-1.20493	0.203862	0.559642	-0.702736	0.927551	0.974561	1.59609	0.0152935	0.0849367
REACTOME EPIGENETIC REGULATION OF GENE EXPRESSION	-0.966037	0.50936	1	-0.774656	0.946873	1	-0.884325	0.705574	1	-0.740535	0.962747	1	2.04425	0.000286041	0.00278502	2.21863	0.00029976	0.00268997	-0.777626	0.88129	0.948328	-0.964983	0.5192	0.733616	1.51225	0.0195841	0.232412	-1.28295	0.126052	0.42438	-1.43184	0.0221088	0.0759023	-1.17087	0.171206	0.459638
REACTOME ESTROGEN DEPENDENT GENE EXPRESSION	1.16888	0.217236	0.775097	1.20675	0.175038	0.652766	-0.900142	0.658678	0.994986	-1.05084	0.345722	0.830108	1.92237	0.000287026	0.00278502	2.03541	0.00029976	0.00268997	1.26187	0.115476	0.398692	0.721832	0.933333	0.983838	1.77808	0.00121778	0.0614465	0.864525	0.672127	0.889659	-0.978461	0.50924	0.681939	0.957043	0.530606	0.806161
REACTOME EXTRA NUCLEAR ESTROGEN SIGNALING	0.948783	0.574923	1	1.19305	0.216206	0.7103	0.982941	0.482777	0.991099	0.896739	0.627606	0.939727	-1.55085	0.00654116	0.0272585	-1.51652	0.0109273	0.0383241	-0.778978	0.852643	0.93824	0.950978	0.508935	0.724712	-0.766083	0.867451	0.990877	-0.878824	0.641928	0.876596	1.49509	0.0189639	0.07024	-0.899056	0.656944	0.880528
REACTOME FANCONI ANEMIA PATHWAY	0.326958	1	1	-0.733496	0.893178	1	-0.906448	0.604148	0.991099	-0.96942	0.500684	0.886313	1.60984	0.00927961	0.0356864	1.76197	0.00276869	0.0130096	0.562779	0.979296	0.989816	-1.02548	0.432833	0.659169	0.790979	0.76058	0.978909	-0.815351	0.718945	0.919001	-1.3182	0.118081	0.250573	-1.88018	0.00090212	0.0100203
REACTOME FCERI MEDIATED CA 2 MOBILIZATION	-0.681184	0.913892	1	-0.765851	0.800453	1	0.689736	0.880116	1	0.888073	0.611634	0.936739	-1.56536	0.0142784	0.0501153	-1.21864	0.194515	0.363074	1.39553	0.0874973	0.344197	1.21354	0.209257	0.42024	0.798935	0.754529	0.978909	1.3134	0.138693	0.447927	1.71421	0.0110242	0.0481136	1.67216	0.0134389	0.0780354
REACTOME FCGR3A MEDIATED IL10 SYNTHESIS	1.28375	0.142877	0.648753	-0.956603	0.507536	0.944223	0.882349	0.642677	0.994304	0.729297	0.845973	1	-1.64241	0.00570757	0.025041	-1.16547	0.236816	0.416197	0.89055	0.61329	0.836778	1.63188	0.0261294	0.118587	1.01552	0.429423	0.871629	1.59499	0.0368759	0.214823	2.28147	0.000376364	0.00960416	1.79404	0.00320114	0.0252426
REACTOME FORMATION OF THE CORNIFIED ENVELOPE	1.5081	0.00596044	0.0899705	1.68983	0.000137988	0.0192666	1.43395	0.041346	0.809491	1.68401	0.00270612	0.164622	1.46837	0.0104281	0.0389024	-0.616528	0.996466	0.998841	1.25943	0.146901	0.445849	1.53564	0.0557817	0.187674	0.77674	0.847826	0.990877	1.80122	0.0142502	0.116087	1.03538	0.385671	0.578239	0.519547	0.979664	1
REACTOME G ALPHA Z SIGNALLING EVENTS	1.05631	0.426566	0.932435	0.731454	0.838639	1	1.15626	0.267145	0.963258	1.12632	0.303809	0.82397	-1.60909	0.00646981	0.0271427	-1.14979	0.240698	0.41967	-0.960241	0.512888	0.765954	1.80015	0.00584795	0.0553346	1.10548	0.3001	0.76947	0.689529	0.89619	0.990058	1.56266	0.0191801	0.07024	1.45356	0.0689594	0.264872
REACTOME G PROTEIN MEDIATED EVENTS	1.09466	0.360292	0.905512	0.761648	0.818777	1	-1.08952	0.313037	0.963258	-0.781051	0.824681	1	-1.79635	0.000496853	0.00368868	-1.58564	0.00713012	0.0279015	-0.926032	0.577824	0.81496	1.056	0.359146	0.586927	-0.918362	0.577521	0.932609	0.516459	0.996003	0.999101	1.83792	0.00173385	0.0136328	1.35269	0.107016	0.354319
REACTOME G2 M CHECKPOINTS	-0.627945	1	1	-0.931769	0.628128	0.991649	-0.869466	0.786959	1	-1.11545	0.216979	0.772594	1.87445	0.000303122	0.00278502	2.30353	0.000309119	0.00268997	-1.08864	0.284281	0.602164	-1.4089	0.0301242	0.132167	-1.04851	0.350356	0.808319	0.970344	0.477046	0.782007	-1.43481	0.017487	0.0663589	-0.782522	0.939422	1
REACTOME GABA RECEPTOR ACTIVATION	0.988728	0.519526	1	-0.92235	0.569935	0.976152	1.15678	0.274066	0.963258	1.12904	0.304655	0.82397	-1.42253	0.0323107	0.091145	-1.13804	0.251323	0.428977	-1.38245	0.0639415	0.293455	1.75178	0.0127098	0.0842134	-1.16111	0.233992	0.681217	0.743348	0.824051	0.966645	1.4968	0.0323673	0.0992988	1.30861	0.148497	0.428286
REACTOME GLYCOSAMINOGLYCAN METABOLISM	0.730745	0.909422	1	0.884677	0.688886	1	-1.0866	0.275202	0.963258	-1.02298	0.397239	0.849705	-2.14595	0.000153092	0.00278502	-1.96095	0.000148987	0.00268997	1.1483	0.201699	0.516368	1.12396	0.262133	0.479921	-0.913443	0.624236	0.95368	-0.673168	0.956143	0.999101	1.77538	0.000588928	0.00960416	1.17286	0.219246	0.525984
REACTOME GOLGI TO ER RETROGRADE TRANSPORT	-1.27832	0.0487106	0.383167	-1.22095	0.104135	0.559785	1.12306	0.247059	0.963258	0.908492	0.638043	0.945217	-1.85866	0.000152788	0.00278502	-1.99186	0.000149076	0.00268997	0.940859	0.57146	0.814543	0.974529	0.479167	0.700763	-0.851893	0.767048	0.978909	-0.992233	0.457508	0.779203	1.51253	0.0052459	0.0276523	0.980744	0.482661	0.769951
REACTOME GPCR LIGAND BINDING	0.871399	0.751642	1	1.30088	0.0555309	0.476667	1.21619	0.111359	0.906723	1.21593	0.12755	0.649385	-1.16013	0.0897319	0.194107	-1.13137	0.136241	0.282463	-1.03107	0.360137	0.675406	1.87268	0.000814996	0.0116736	-0.656984	1	1	1.19271	0.187864	0.533257	1.9297	0.000821693	0.00960416	1.73937	0.000722439	0.00888428
REACTOME HDR THROUGH HOMOLOGOUS RECOMBINATION HRR	-0.86581	0.721868	1	-1.06983	0.327202	0.812108	-1.06276	0.337982	0.965007	-1.14885	0.232968	0.781457	2.10709	0.000263227	0.00278502	2.22644	0.000269034	0.00268997	-0.77674	0.838299	0.930941	-1.02547	0.420235	0.647837	-0.925251	0.56553	0.927631	-0.654226	0.950493	0.999101	-1.51976	0.0139995	0.0573819	-1.10041	0.287189	0.589793
REACTOME HDR THROUGH SINGLE STRAND ANNEALING SSA	-0.914957	0.591609	1	-1.05161	0.370018	0.857644	-1.00966	0.446102	0.990771	-1.10815	0.308645	0.826753	1.82686	0.000731172	0.00481159	2.14748	0.000249377	0.00268997	-0.966769	0.496721	0.758571	-1.16599	0.267389	0.484761	-1.03934	0.397673	0.850074	-1.21681	0.214324	0.574809	-1.57006	0.015873	0.0626781	-1.28978	0.133063	0.40309
REACTOME HIV LIFE CYCLE	-0.627202	1	1	-0.653662	1	1	0.675771	0.994832	1	0.659457	0.99364	1	1.60511	0.000598265	0.00418786	1.83063	0.000306654	0.00268997	-1.0492	0.346711	0.659067	-1.03415	0.387705	0.623142	0.896737	0.670441	0.960055	0.744177	0.929829	0.999101	-1.61713	0.000801557	0.00960416	-0.996731	0.444025	0.737424
REACTOME HIV TRANSCRIPTION INITIATION	0.839636	0.716043	1	0.500519	0.997341	1	0.724084	0.889754	1	0.810664	0.75591	0.987545	1.78249	0.000500626	0.00368868	1.75749	0.00206132	0.0101155	-1.27198	0.147274	0.445849	-1.11659	0.313696	0.537462	-0.634254	0.946027	0.995291	-1.08006	0.357143	0.717856	-1.7087	0.00254079	0.0173352	-1.11459	0.289019	0.591201
REACTOME HOMOLOGOUS DNA PAIRING AND STRAND EXCHANGE	-0.680568	0.963143	1	-0.859926	0.689268	1	-1.08692	0.333333	0.965007	-1.16087	0.248219	0.797529	2.11453	0.000248201	0.00278502	2.33806	0.000255558	0.00268997	-1.14656	0.252938	0.571134	-1.07683	0.36876	0.597624	-1.08142	0.334069	0.798971	-1.14113	0.287418	0.651567	-1.53633	0.0188372	0.0700226	-1.39873	0.059991	0.243979
REACTOME HOMOLOGY DIRECTED REPAIR	-0.92714	0.616883	1	-1.04762	0.330623	0.81345	-0.907611	0.641904	0.994304	-1.06062	0.326634	0.830108	2.15213	0.000288434	0.00278502	2.27007	0.000302206	0.00268997	-0.893772	0.665116	0.870123	-1.28991	0.105047	0.275783	-0.921687	0.598424	0.939846	-1.09337	0.305471	0.669763	-1.59622	0.00327988	0.0209126	-1.27545	0.0855432	0.306338
REACTOME HS GAG DEGRADATION	-1.14532	0.296648	0.862905	-1.21133	0.22401	0.721092	1.00186	0.47943	0.991099	0.73665	0.806222	1	-1.69274	0.00591304	0.0252449	-1.64229	0.012114	0.0418827	1.63568	0.0311168	0.196262	NA	NA	NA	1.37295	0.114042	0.535021	NA	NA	NA	1.61611	0.0262009	0.0853309	NA	NA	NA
REACTOME INTERLEUKIN 12 SIGNALING	1.18159	0.252886	0.82133	0.785723	0.771612	1	0.754683	0.840101	1	0.811358	0.749377	0.987545	-1.40714	0.0455076	0.117791	-1.6352	0.00506453	0.0212536	1.5984	0.0240086	0.169411	1.50724	0.0542389	0.186017	0.735474	0.86269	0.990877	1.73783	0.020041	0.14363	1.89534	0.00225649	0.0162288	1.64276	0.0178959	0.0957282
REACTOME INTERLEUKIN 6 FAMILY SIGNALING	-1.58719	0.0173941	0.186819	-1.69315	0.00587871	0.226664	0.768179	0.778387	1	-0.904618	0.580154	0.923402	-1.50347	0.0326369	0.0913832	-1.32432	0.120872	0.255827	1.88078	0.0029838	0.0472484	NA	NA	NA	1.50504	0.0573185	0.401076	NA	NA	NA	1.89331	0.00544465	0.0280829	NA	NA	NA
REACTOME INTERLEUKIN 7 SIGNALING	0.949081	0.570085	1	0.664427	0.894683	1	-1.29807	0.148964	0.924406	-1.56737	0.024496	0.42824	-1.0544	0.380601	0.538285	-0.731992	0.861502	0.934142	1.62143	0.0332481	0.202903	1.94042	0.00167987	0.0201999	1.36602	0.122154	0.537797	NA	NA	NA	1.76848	0.0102932	0.0462336	1.78584	0.00325546	0.0254764
REACTOME IRE1ALPHA ACTIVATES CHAPERONES	-0.78141	0.86865	1	-1.08702	0.318474	0.802635	-0.886941	0.651719	0.994304	-0.651896	0.966082	1	-2.13708	0.000165371	0.00278502	-2.10041	0.000162048	0.00268997	1.22609	0.176232	0.48647	0.888264	0.622646	0.80861	0.929979	0.558559	0.927631	0.811044	0.74192	0.927872	1.57657	0.0132177	0.0558771	0.771139	0.797692	0.961512
REACTOME MEIOTIC SYNAPSIS	0.727681	0.846823	1	0.672846	0.905143	1	-1.3314	0.097937	0.906723	-1.34921	0.0961933	0.590156	1.89999	0.000257666	0.00278502	1.75937	0.00156617	0.00843376	1.73616	0.00515796	0.0647038	-1.51348	0.044361	0.161826	1.66096	0.0130104	0.197932	-0.57496	0.957789	0.999101	-1.16649	0.258317	0.439914	-0.527424	0.98942	1
REACTOME METABOLISM OF CARBOHYDRATES	1.15908	0.163512	0.709832	0.850196	0.803847	1	-0.935858	0.654135	0.994986	-0.966595	0.542814	0.908119	-1.45324	0.00154256	0.00850456	-1.18401	0.0964344	0.221435	1.56925	0.00045045	0.0137448	1.25939	0.0698462	0.218746	-0.917985	0.677786	0.960889	-0.708925	0.984285	0.999101	1.56124	0.00130208	0.0115319	0.818309	0.845594	0.982567
REACTOME MITOCHONDRIAL BIOGENESIS	1.58382	0.000233236	0.0124059	1.47428	0.0106319	0.262142	-0.877004	0.710377	1	-0.743161	0.945459	1	0.9729	0.510294	0.655491	0.91995	0.6442	0.792711	-1.19451	0.175612	0.485947	-1.32051	0.0803853	0.23798	-1.79479	0.00158197	0.0614465	-1.56294	0.020068	0.14363	-1.47356	0.0137104	0.057286	-1.27213	0.0963265	0.329488
REACTOME MITOTIC METAPHASE AND ANAPHASE	-1.14092	0.114754	0.601238	-1.2558	0.0410184	0.432868	-1.03226	0.349377	0.965007	-1.15359	0.13545	0.654968	1.6408	0.000325839	0.00278822	2.12006	0.00035137	0.00275882	0.907404	0.68048	0.878069	-1.24994	0.0868594	0.249072	1.02052	0.397575	0.850074	0.725166	0.982189	0.999101	-1.33092	0.0272887	0.0880756	0.579124	1	1
REACTOME MRNA SPLICING MINOR PATHWAY	0.602153	0.973008	1	0.298132	1	1	-0.483322	0.999535	1	0.54353	0.997062	1	1.8543	0.000503145	0.00368868	1.9384	0.000260078	0.00268997	-0.959821	0.509462	0.765889	-0.830214	0.710363	0.858429	1.13075	0.2732	0.731729	-0.538927	0.989219	0.999101	-1.74441	0.00143716	0.0121528	0.88545	0.612411	0.863007
REACTOME MUSCLE CONTRACTION	1.32328	0.0321347	0.291916	1.71476	0.000112613	0.0192666	-0.929239	0.621815	0.991099	-1.12806	0.202352	0.757506	-1.34412	0.0205339	0.0660588	-1.03947	0.359511	0.546223	-1.12353	0.215538	0.529192	1.13065	0.250735	0.469646	-0.917642	0.649225	0.960055	-0.90473	0.641472	0.876596	1.7171	0.00146199	0.0122172	0.932765	0.574915	0.837641
REACTOME NEGATIVE EPIGENETIC REGULATION OF RRNA EXPRESSION	-0.631931	0.997265	1	-0.741975	0.932769	1	-0.57033	0.999055	1	0.502821	0.999484	1	1.74128	0.000268601	0.00278502	1.81642	0.000272777	0.00268997	-1.14667	0.248643	0.565963	-0.905244	0.612174	0.806618	1.23574	0.172434	0.605378	-1.11696	0.300578	0.665955	-1.44056	0.0318193	0.0991366	-0.883709	0.671556	0.888243
REACTOME NONHOMOLOGOUS END JOINING NHEJ	0.536463	0.990448	1	0.331898	1	1	0.725569	0.887984	1	0.63146	0.963229	1	1.59722	0.00563092	0.0247947	1.43498	0.0341947	0.0979176	-1.3238	0.112172	0.39412	-1.10992	0.321483	0.54742	0.729513	0.854871	0.990877	-0.994171	0.465385	0.779767	-1.71083	0.00344685	0.0214869	-1.29381	0.123319	0.38679
REACTOME NR1H2 AND NR1H3 MEDIATED SIGNALING	1.47907	0.0121739	0.141649	1.53264	0.0138418	0.284007	-1.07384	0.355928	0.965007	0.854383	0.684951	0.967244	1.5404	0.0132666	0.0475005	1.60383	0.0110256	0.0385581	1.94473	0.000861883	0.0243267	1.38095	0.0943953	0.260797	1.68717	0.009	0.157985	-0.921819	0.573858	0.84809	1.01534	0.415936	0.603119	-1.183	0.213027	0.518383
REACTOME NR1H3 NR1H2 REGULATE GENE EXPRESSION LINKED TO CHOLESTEROL TRANSPORT AND EFFLUX	1.14256	0.312903	0.873781	1.23819	0.198349	0.681712	-1.19309	0.230423	0.963258	-1.03275	0.414427	0.856374	1.60795	0.0106744	0.0393501	1.6179	0.0133737	0.0449608	1.81332	0.00343127	0.050467	1.21992	0.197697	0.404447	1.65382	0.0168852	0.211714	1.16199	0.258233	0.628428	1.05198	0.346728	0.537803	0.828592	0.688564	0.902369
REACTOME NUCLEAR PORE COMPLEX NPC DISASSEMBLY	-1.63707	0.00640784	0.0941784	-1.50277	0.035328	0.432868	-0.880464	0.639829	0.994304	-1.15351	0.256416	0.804879	1.46777	0.0332041	0.0925554	1.98735	0.000249377	0.00268997	-0.737602	0.850197	0.93824	0.872553	0.637586	0.817416	0.799993	0.756059	0.978909	1.01217	0.417695	0.755471	-0.618989	0.960414	0.990929	-0.763859	0.837358	0.982567
REACTOME OPIOID SIGNALLING	1.121	0.304145	0.868496	-0.931202	0.598709	0.978414	-0.918734	0.607246	0.991099	-0.730201	0.935172	1	-1.83952	0.000314614	0.00278502	-1.47168	0.0146408	0.048791	-1.10436	0.275065	0.589276	1.33444	0.0966667	0.265124	-1.34381	0.0739277	0.458432	-0.573416	0.994858	0.999101	1.63991	0.00320171	0.0206673	1.21636	0.182698	0.473001
REACTOME OTHER SEMAPHORIN INTERACTIONS	1.14888	0.327842	0.879518	1.21744	0.241994	0.736751	-0.819369	0.709343	1	1.02641	0.445492	0.875008	-1.55186	0.0242245	0.0737987	-1.49361	0.0457516	0.125405	1.15636	0.271776	0.583337	NA	NA	NA	-0.872562	0.62957	0.95368	1.42079	0.0992844	0.370717	1.65727	0.0249468	0.0827465	1.77583	0.00448168	0.0317094
REACTOME PKA MEDIATED PHOSPHORYLATION OF CREB	1.32641	0.117612	0.605406	-0.875372	0.620376	0.988531	0.866645	0.651529	0.994304	0.855322	0.65682	0.950996	-1.83929	0.00052283	0.00376788	-1.53953	0.0323357	0.0939203	-1.29316	0.158894	0.46235	0.807878	0.701792	0.853365	-0.706796	0.854575	0.990877	-0.731368	0.809222	0.966645	1.94002	0.00280724	0.0186803	1.36169	0.138149	0.41245
REACTOME POLYMERASE SWITCHING ON THE C STRAND OF THE TELOMERE	-0.719957	0.876918	1	-0.979259	0.484918	0.929709	-1.1665	0.272667	0.963258	-1.41232	0.0796227	0.566548	2.2243	0.000239406	0.00278502	2.30194	0.000241429	0.00268997	0.757059	0.781969	0.909536	-1.6165	0.0159026	0.0915466	0.941322	0.530774	0.920583	-0.744259	0.813402	0.966645	-1.25534	0.179057	0.33395	-1.14861	0.271335	0.580308
REACTOME PROCESSING OF CAPPED INTRONLESS PRE MRNA	0.706175	0.857704	1	0.602772	0.950778	1	0.465938	0.995838	1	0.342627	0.999634	1	1.66327	0.0105973	0.0391817	1.84199	0.000978474	0.00589506	-1.38175	0.10226	0.371226	-1.19516	0.244801	0.462085	1.09963	0.338215	0.798971	-0.588864	0.948226	0.999101	-1.79815	0.00084317	0.00960416	-1.03016	0.424198	0.718354
REACTOME PROCESSING OF DNA DOUBLE STRAND BREAK ENDS	-0.679726	0.990213	1	-1.00572	0.431169	0.895418	-0.746623	0.927039	1	-0.902905	0.634047	0.943817	1.92784	0.000272109	0.00278502	2.10034	0.000278784	0.00268997	-1.18737	0.191501	0.503974	-1.31707	0.109637	0.280279	-1.14752	0.245426	0.699591	-0.99377	0.460825	0.779203	-1.6485	0.00357645	0.0218307	-1.18266	0.19629	0.4982
REACTOME PROCESSING OF INTRONLESS PRE MRNAS	0.685799	0.860662	1	0.289649	1	1	0.439576	0.99541	1	0.321136	0.99981	1	1.56437	0.0295497	0.085229	1.85016	0.00262655	0.0125353	NA	NA	NA	-1.22452	0.229088	0.442721	NA	NA	NA	NA	NA	NA	-1.64963	0.00955742	0.0436563	-0.815792	0.719959	0.91372
REACTOME REGULATION OF LIPID METABOLISM BY PPARALPHA	1.55636	0.000569217	0.0244544	1.62431	0.000351247	0.0393033	0.835337	0.786413	1	0.795902	0.845142	1	1.27842	0.0484883	0.122053	1.3476	0.0255087	0.0776101	0.977009	0.485285	0.758571	-1.03522	0.388595	0.623384	1.22451	0.132284	0.545923	-0.665288	0.973018	0.999101	-0.85792	0.745646	0.869921	-0.755373	0.952479	1
REACTOME REGULATION OF TP53 ACTIVITY THROUGH PHOSPHORYLATION	1.03318	0.441464	0.935764	1.01289	0.463007	0.918542	0.77638	0.87238	1	0.758765	0.886264	1	1.73332	0.000548998	0.00390887	2.06367	0.000289268	0.00268997	-0.898096	0.646009	0.858052	-1.13772	0.259874	0.479389	-1.22284	0.153357	0.574843	-1.0689	0.344041	0.707864	-1.60703	0.00329791	0.0209126	-0.986699	0.478098	0.769277
REACTOME RETROGRADE TRANSPORT AT THE TRANS GOLGI NETWORK	0.56908	0.983942	1	0.572819	0.984601	1	0.839063	0.721803	1	0.948707	0.532033	0.908119	-1.35159	0.066357	0.153397	-1.76025	0.000652848	0.00422615	-1.46518	0.0492481	0.259818	-1.6071	0.0125607	0.0837954	-1.33206	0.113623	0.535021	-1.34776	0.109171	0.390676	-1.62138	0.00646353	0.0321685	-1.17786	0.203476	0.507706
REACTOME RHO GTPASES ACTIVATE PAKS	1.246	0.201952	0.764061	1.38376	0.0834808	0.523866	0.872517	0.64359	0.994304	0.882557	0.618729	0.937748	-1.55347	0.0229685	0.0706636	-1.55962	0.0253121	0.0772052	-1.18104	0.246893	0.565963	0.857459	0.642806	0.818173	1.42275	0.0898476	0.50253	-0.662712	0.880289	0.987877	1.79847	0.00824089	0.0386247	1.05762	0.395947	0.695445
REACTOME RHOD GTPASE CYCLE	1.15986	0.265436	0.837891	1.40652	0.0489456	0.452315	0.719026	0.908819	1	-0.971819	0.49456	0.886313	-1.46392	0.0265252	0.0790679	-1.56473	0.0100226	0.0359854	1.35727	0.0848976	0.339891	1.09273	0.31398	0.537462	0.88068	0.651558	0.960055	0.98459	0.451968	0.779203	1.55496	0.0179795	0.0677687	1.40492	0.0756573	0.28113
REACTOME RIP MEDIATED NFKB ACTIVATION VIA ZBP1	-1.41018	0.0863158	0.551384	-1.35008	0.136901	0.614237	-0.807605	0.72543	1	-1.11931	0.336809	0.830108	-1.74299	0.00331878	0.015966	-1.76226	0.0031115	0.0143981	1.52447	0.0558408	0.27501	1.66831	0.0255675	0.117466	1.06698	0.381179	0.837805	NA	NA	NA	1.67151	0.0212177	0.0735456	NA	NA	NA
REACTOME RNA POLYMERASE II TRANSCRIBES SNRNA GENES	1.44484	0.0127526	0.146853	0.85187	0.711881	1	-0.471938	1	1	0.621541	0.987353	1	1.94559	0.000266738	0.00278502	1.961	0.000271592	0.00268997	-0.893171	0.642937	0.858052	-1.27121	0.129575	0.310089	1.31407	0.0987555	0.526164	-1.15765	0.238747	0.604101	-1.66183	0.00237559	0.0166292	-1.42363	0.0326001	0.154476
REACTOME ROS AND RNS PRODUCTION IN PHAGOCYTES	0.649131	0.90745	1	1.04239	0.434193	0.896477	1.35774	0.100563	0.906723	1.42723	0.0731349	0.566548	-1.05317	0.383333	0.540392	-1.12736	0.28051	0.460082	0.966416	0.49764	0.758571	1.74313	0.0121835	0.0829839	0.555694	0.983897	0.996841	1.80258	0.0145092	0.117244	2.021	0.000699545	0.00960416	1.93359	0.00073193	0.00889511
REACTOME RRNA PROCESSING	0.836798	0.816266	1	0.486944	1	1	1.19643	0.124687	0.906723	1.39151	0.0220244	0.42824	1.85972	0.000311429	0.00278502	1.84352	0.000328192	0.00268997	-0.860013	0.763373	0.904353	-0.944864	0.56411	0.775616	1.16157	0.189463	0.625087	1.89777	0.000497636	0.00808469	-1.03149	0.40894	0.598293	1.0164	0.426403	0.719796
REACTOME SEPARATION OF SISTER CHROMATIDS	-1.00849	0.403053	0.916864	-1.1713	0.11488	0.567827	-0.970294	0.512911	0.991099	-1.04676	0.327389	0.830108	1.61954	0.000309502	0.00278502	2.13141	0.000332557	0.00268997	1.0114	0.404269	0.707628	-1.32144	0.0564158	0.187962	0.961528	0.528069	0.920583	0.906098	0.635976	0.876596	-1.35348	0.0283744	0.0904905	0.592432	0.999578	1
REACTOME SIGNALING BY GPCR	0.990622	0.536889	1	1.14897	0.165191	0.643707	1.19144	0.0838464	0.87672	1.31078	0.022753	0.42824	NA	NA	NA	NA	NA	NA	NA	NA	NA	1.91563	0.000328731	0.00744614	NA	NA	NA	1.00762	0.419477	0.755963	1.92699	0.00242718	0.0167725	1.81181	0.000125549	0.00292644
REACTOME SIGNALING BY NUCLEAR RECEPTORS	1.41724	0.0036607	0.0659517	1.39868	0.00764592	0.243004	1.13732	0.188321	0.963258	1.19851	0.124505	0.649385	1.33284	0.00406091	0.0189509	1.31484	0.00964392	0.0351397	1.41363	0.0115172	0.110194	1.05745	0.308864	0.531508	1.22414	0.0881066	0.50253	-0.836369	0.805043	0.966645	-0.801494	0.889745	0.95723	-0.830586	0.926829	1
REACTOME SIGNALING BY PTK6	-1.2422	0.140455	0.645629	-1.06978	0.343763	0.831131	1.3376	0.0868573	0.888101	1.08098	0.343858	0.830108	-1.48411	0.0223207	0.0695807	-1.47369	0.0248949	0.0765079	-1.12456	0.26838	0.582247	1.22221	0.189608	0.393112	0.959563	0.512841	0.909065	1.38447	0.0960829	0.363936	1.57263	0.0166099	0.0644081	0.881527	0.629139	0.868614
REACTOME SIGNALING BY THE B CELL RECEPTOR BCR	-0.705635	0.991004	1	-0.953319	0.541207	0.967195	-0.660118	0.993946	1	-0.935568	0.578448	0.923402	-1.39758	0.0226852	0.0701383	-1.37684	0.0311131	0.0907726	0.883709	0.690101	0.879857	-1.01907	0.420362	0.647837	-0.843199	0.765748	0.978909	1.52115	0.0302509	0.185959	0.960232	0.564409	0.727791	1.74223	0.00137132	0.0137532
REACTOME SIGNALLING TO ERKS	-0.944774	0.532613	1	-1.14315	0.263943	0.763272	0.719777	0.868534	1	0.595857	0.962776	1	-1.88495	0.000169895	0.00278502	-1.91075	0.000333834	0.00268997	1.09629	0.325113	0.642174	0.562106	0.976608	0.998976	-1.99698	0.000402576	0.023756	-0.782574	0.763144	0.947248	1.42174	0.0636586	0.163464	-1.29516	0.128552	0.396166
REACTOME SIGNALLING TO RAS	-0.801862	0.73609	1	-0.790661	0.754093	1	0.783957	0.757004	1	-0.734619	0.819287	1	-1.59211	0.0171299	0.0578423	-1.67219	0.00825593	0.0311067	1.22049	0.219044	0.531828	0.803967	0.707527	0.858196	-2.03064	0.000201979	0.0141838	NA	NA	NA	NA	NA	NA	-1.12189	0.315063	0.621701
REACTOME SNRNP ASSEMBLY	0.277591	1	1	-0.417823	1	1	0.497596	0.998245	1	0.455641	0.999827	1	1.53003	0.0105793	0.0391817	2.11563	0.000262055	0.00268997	-1.45682	0.0498407	0.261722	-0.937129	0.559526	0.775218	-0.89321	0.611943	0.94603	0.741668	0.845938	0.96872	-1.76764	0.000787298	0.00960416	-1.30871	0.10095	0.339679
REACTOME SPHINGOLIPID METABOLISM	0.712747	0.905796	1	-0.962854	0.514846	0.950551	1.01641	0.428228	0.980017	1.01376	0.439459	0.870553	-1.91414	0.000158053	0.00278502	-1.98949	0.000154703	0.00268997	1.15632	0.216072	0.529192	1.45397	0.0457516	0.16535	0.815597	0.792609	0.980875	1.38582	0.0752688	0.318465	1.52714	0.0118374	0.0510427	1.28466	0.126508	0.393623
REACTOME SUMOYLATION OF CHROMATIN ORGANIZATION PROTEINS	-1.05926	0.335146	0.884325	-0.945394	0.539383	0.967195	-0.488089	1	1	-0.565173	0.995945	1	1.55615	0.00888192	0.034584	1.72473	0.00133156	0.00739957	-1.78701	0.00448766	0.0594151	-0.969423	0.500743	0.717812	-0.86569	0.672923	0.960055	0.686704	0.921145	0.999101	-0.929167	0.583669	0.746376	-1.19258	0.18193	0.472278
REACTOME SWITCHING OF ORIGINS TO A POST REPLICATIVE STATE	-0.755122	0.96477	1	-0.926657	0.601212	0.978942	-1.08621	0.287708	0.963258	-1.27236	0.0980296	0.591887	1.43461	0.0153719	0.053204	1.83478	0.000288351	0.00268997	-0.983662	0.479827	0.758571	-1.48809	0.0212631	0.106678	-0.85446	0.72492	0.9769	0.89229	0.6299	0.876596	-1.47258	0.014174	0.057424	0.825091	0.751712	0.931551
REACTOME TELOMERE EXTENSION BY TELOMERASE	-0.681689	0.902234	1	-0.607031	0.964621	1	-1.15791	0.295725	0.963258	-0.999325	0.467808	0.876799	2.09711	0.000236518	0.00278502	1.77736	0.0036302	0.0163024	0.900846	0.579497	0.81496	-1.5892	0.0245073	0.114211	0.991948	0.463308	0.891458	-1.2258	0.217415	0.577851	-1.53395	0.0311085	0.0972028	-1.57686	0.0204814	0.106318
REACTOME TOLL LIKE RECEPTOR 9 TLR9 CASCADE	0.998969	0.499648	1	0.563325	0.99569	1	0.75849	0.902839	1	0.977217	0.499159	0.886313	-1.34053	0.0479711	0.121241	-1.24325	0.105424	0.234982	1.64118	0.00366221	0.0530082	0.926882	0.56354	0.775616	-0.80985	0.820884	0.990798	1.6568	0.015595	0.123041	1.59719	0.00385039	0.0224032	1.63451	0.00724181	0.046755
REACTOME TRANSCRIPTION OF THE HIV GENOME	0.649792	0.953266	1	0.469669	1	1	0.76843	0.867522	1	0.932669	0.561114	0.92017	1.69636	0.00158019	0.00859792	1.7303	0.00216802	0.0104936	-0.992822	0.457239	0.745644	-1.22533	0.177781	0.377253	0.831687	0.736621	0.978909	-1.01664	0.424799	0.760087	-1.55685	0.0094685	0.0435748	-1.14239	0.233614	0.542299
REACTOME TRANSLOCATION OF SLC2A4 GLUT4 TO THE PLASMA MEMBRANE	1.42278	0.0186847	0.195054	1.41964	0.035804	0.432868	1.21519	0.178466	0.963258	1.40215	0.0541099	0.566548	-1.79015	0.00048247	0.00368868	-1.64772	0.00221239	0.0106422	-0.90788	0.606499	0.834166	1.56352	0.0280799	0.125317	-0.973255	0.483877	0.899192	0.762456	0.823296	0.966645	1.62064	0.00647549	0.0321685	-0.794613	0.841622	0.982567
REACTOME TRANSMISSION ACROSS CHEMICAL SYNAPSES	0.996423	0.50778	1	1.00768	0.476437	0.926506	1.37115	0.0215463	0.703022	1.52227	0.00421875	0.181244	-1.53937	0.000426136	0.00340363	-1.2698	0.0379764	0.107233	-1.81647	0.000179179	0.00950081	1.41882	0.0329078	0.138439	-1.3332	0.0254559	0.276621	-0.832758	0.810331	0.966645	1.52816	0.000896057	0.00960416	0.964889	0.523508	0.797616
REACTOME TRANSPORT OF INORGANIC CATIONS ANIONS AND AMINO ACIDS OLIGOPEPTIDES	1.46775	0.00694777	0.0982362	1.35045	0.06042	0.481114	1.46871	0.0162839	0.673669	1.137	0.259373	0.806087	-1.37145	0.0314241	0.0891902	-1.05101	0.354668	0.54225	0.978878	0.475505	0.752938	0.761012	0.861562	0.945557	0.9378	0.563972	0.927631	0.897597	0.611111	0.864011	1.3818	0.0324241	0.0992988	-0.997421	0.454139	0.745827
REACTOME TRANSPORT OF MATURE MRNAS DERIVED FROM INTRONLESS TRANSCRIPTS	0.328963	1	1	0.348883	1	1	0.578323	0.98433	1	0.52242	0.993099	1	1.53715	0.0156366	0.0539702	2.04073	0.000255037	0.00268997	-1.14883	0.256893	0.57546	-0.653456	0.931475	0.983838	0.844093	0.69393	0.962059	0.820547	0.718966	0.919001	-1.51882	0.0203641	0.0717403	-1.06986	0.348832	0.65398
REACTOME TRANSPORT OF MATURE TRANSCRIPT TO CYTOPLASM	-0.351832	1	1	-0.482883	1	1	-0.647705	0.992269	1	-0.513077	0.999757	1	1.8173	0.000268601	0.00278502	2.23348	0.000280112	0.00268997	-1.10072	0.290678	0.609992	-1.37582	0.056302	0.187962	1.36867	0.0708551	0.453747	-0.697572	0.932783	0.999101	-1.66827	0.00210474	0.0159783	-1.09342	0.278901	0.589186
REACTOME TRANSPORT OF VITAMINS NUCLEOSIDES AND RELATED MOLECULES	1.40827	0.0397213	0.341868	1.45037	0.0432931	0.432868	-1.05385	0.400582	0.978593	-1.0352	0.414374	0.856374	-1.57511	0.0112171	0.0412288	-1.78117	0.000993542	0.00595636	1.80718	0.0032175	0.0484341	-0.685982	0.879716	0.951658	-0.737624	0.853379	0.990877	-1.13995	0.294422	0.659979	-1.05949	0.390592	0.583183	-1.51591	0.0290828	0.141045
REACTOME TRANSPORT TO THE GOLGI AND SUBSEQUENT MODIFICATION	-1.10163	0.166895	0.712644	-1.05009	0.300805	0.787948	1.1968	0.133939	0.906723	1.23599	0.110713	0.615257	-2.1157	0.000147995	0.00278502	-2.262	0.00014341	0.00268997	-1.01826	0.40803	0.709838	1.0384	0.3551	0.584511	-1.0865	0.283794	0.744389	-0.806383	0.844563	0.96872	1.52474	0.000864304	0.00960416	0.82166	0.802091	0.963045
REACTOME TRNA PROCESSING	0.883704	0.700322	1	0.727492	0.902955	1	0.828396	0.790948	1	0.80656	0.820645	1	1.19845	0.112931	0.231279	1.79793	0.000294724	0.00268997	-1.02272	0.399888	0.703973	-1.39337	0.0437227	0.160097	-0.742412	0.924532	0.99347	-0.729626	0.910433	0.998089	-1.87395	0.000119947	0.00781227	-1.58114	0.00392927	0.0291691
REACTOME TRNA PROCESSING IN THE NUCLEUS	0.457189	0.99962	1	0.314118	1	1	0.665107	0.956377	1	0.718297	0.903723	1	1.41634	0.0322498	0.091145	1.98816	0.000261028	0.00268997	-0.958532	0.516558	0.769542	-0.861976	0.684063	0.844672	-0.67896	0.93902	0.994678	0.861509	0.657754	0.884311	-1.66263	0.0042885	0.0242042	-1.38135	0.0616021	0.245695
KEGG TYPE I DIABETES MELLITUS	NA	NA	NA	NA	NA	NA	NA	NA	NA	NA	NA	NA	-1.11158	0.30183	0.462583	-1.1438	0.262896	0.441345	-0.790155	0.762451	0.904209	NA	NA	NA	-0.783744	0.764458	0.978909	2.00851	0.00112562	0.0154503	1.81453	0.00891759	0.0413794	1.85174	0.000986777	0.0106181
REACTOME CYTOKINE SIGNALING IN IMMUNE SYSTEM	NA	NA	NA	NA	NA	NA	NA	NA	NA	NA	NA	NA	NA	NA	NA	NA	NA	NA	NA	NA	NA	1.93335	0.000396197	0.00821054	NA	NA	NA	2.36105	0.000289352	0.00595719	NA	NA	NA	2.3193	0.000118301	0.00292644
HALLMARK ANGIOGENESIS	1.03706	0.455917	0.95011	0.904194	0.613932	0.983877	-0.879714	0.640189	0.994304	-1.11196	0.312724	0.830108	-1.51951	0.0212585	0.0677445	-1.72589	0.00264945	0.0125952	0.910461	0.58671	0.817068	-0.926365	0.558132	0.77458	1.15032	0.262028	0.722835	-0.96456	0.501513	0.799032	1.12372	0.260669	0.441254	1.62033	0.0208333	0.107604
HALLMARK DNA REPAIR	0.558155	0.999452	1	-0.695871	0.998249	1	-0.649133	0.99947	1	-0.746463	0.97487	1	1.44017	0.0041791	0.0193739	1.82599	0.000311042	0.00268997	0.805038	0.88197	0.948328	-0.826143	0.818935	0.920591	-0.903303	0.655948	0.960055	-0.657876	0.985784	0.999101	-1.15681	0.19604	0.356979	0.573112	0.99927	1
HALLMARK PROTEIN SECRETION	-0.851508	0.823279	1	-1.29793	0.0697385	0.502567	1.15657	0.224005	0.963258	1.13444	0.25332	0.803859	-1.81651	0.000157257	0.00278502	-1.98594	0.000152277	0.00268997	1.0046	0.434671	0.730518	0.598764	0.995899	0.998976	-0.926548	0.586404	0.939729	1.16255	0.210836	0.569428	1.33574	0.0425287	0.121383	1.04988	0.377416	0.680641
HALLMARK UNFOLDED PROTEIN RESPONSE	1.034	0.435257	0.935539	-0.96109	0.528461	0.958265	1.06298	0.342018	0.965007	1.10656	0.280788	0.818131	-1.75548	0.000308976	0.00278502	-1.50266	0.00660066	0.0264405	0.886523	0.685384	0.878999	-0.6369	0.990053	0.998976	0.72793	0.951616	0.995291	1.02354	0.382843	0.731804	0.850282	0.84474	0.933979	1.12349	0.276641	0.588004
HALLMARK UV RESPONSE DN	1.03018	0.437199	0.935539	0.96408	0.562422	0.975506	-0.950702	0.562766	0.991099	-1.12705	0.202507	0.757506	-1.87817	0.000150263	0.00278502	-2.04508	0.000147776	0.00268997	1.06198	0.321675	0.639386	0.912016	0.634265	0.817067	0.946975	0.564275	0.927631	-1.05186	0.354413	0.717856	1.17613	0.116183	0.249492	1.35477	0.0521601	0.220546
KEGG ADIPOCYTOKINE SIGNALING PATHWAY	1.31931	0.0824665	0.535553	1.40764	0.0435449	0.432868	0.763718	0.857887	1	0.741126	0.877969	1	-1.55423	0.00804117	0.0322164	-1.41903	0.0344501	0.0984172	1.47942	0.0364617	0.217476	1.29106	0.129212	0.310089	-0.826916	0.763629	0.978909	1.2429	0.161321	0.484115	1.20668	0.145758	0.289224	1.07755	0.354437	0.66089
KEGG ARRHYTHMOGENIC RIGHT VENTRICULAR CARDIOMYOPATHY ARVC	1.02008	0.469098	0.964976	1.31552	0.0958696	0.557742	0.832291	0.754848	1	-1.01036	0.432797	0.86482	-1.46901	0.0174316	0.058544	-1.35287	0.0545313	0.142719	-0.942978	0.553335	0.799152	1.29344	0.135686	0.318638	1.46155	0.0352776	0.32725	1.14726	0.2451	0.616682	1.53484	0.0138058	0.0573819	1.51686	0.0308509	0.147542
KEGG BASE EXCISION REPAIR	-0.701459	0.920984	1	-0.796401	0.783304	1	-1.29389	0.133063	0.906723	-1.3672	0.0953447	0.590156	2.06818	0.000242777	0.00278502	2.04115	0.000249314	0.00268997	0.811611	0.730843	0.889904	-1.32169	0.139393	0.322491	0.854095	0.660486	0.960055	-0.828087	0.697024	0.911773	-1.23926	0.187456	0.346617	-1.04948	0.388358	0.690489
KEGG BUTANOATE METABOLISM	1.56468	0.00154842	0.0393088	1.34188	0.111159	0.56665	1.11216	0.342692	0.965007	1.1161	0.329901	0.830108	0.859422	0.695122	0.804199	0.813616	0.766362	0.869233	0.967951	0.490167	0.758571	-0.880868	0.620184	0.806618	-1.17782	0.242479	0.695762	-1.35993	0.114563	0.402328	-0.813536	0.732715	0.863242	-1.7553	0.00236967	0.0210023
KEGG CELL CYCLE	0.797356	0.833371	1	0.987893	0.51721	0.953338	1.03421	0.385965	0.975356	-0.99294	0.453149	0.876799	1.63313	0.000287026	0.00278502	1.91778	0.000303398	0.00268997	-0.857721	0.758601	0.902372	-0.905947	0.63587	0.817067	1.01066	0.420935	0.869677	-0.891538	0.649966	0.883583	-1.35512	0.0430538	0.122213	0.647982	0.984018	1
KEGG DNA REPLICATION	-1.0205	0.410305	0.916864	-1.22239	0.175318	0.652766	-1.20913	0.207701	0.963258	-1.43711	0.0580848	0.566548	2.30165	0.000242365	0.00278502	2.50014	0.000251699	0.00268997	0.988278	0.466057	0.747091	-0.915919	0.57973	0.785342	1.42294	0.0802949	0.479667	-1.06724	0.368851	0.720446	-1.11433	0.317201	0.510363	-0.628924	0.967573	1
KEGG DRUG METABOLISM CYTOCHROME P450	1.42897	0.0300288	0.284256	1.37234	0.0842076	0.525474	1.00513	0.47751	0.991099	1.04327	0.405381	0.854364	1.46301	0.0238994	0.0729868	0.717556	0.926549	0.957225	1.66999	0.021363	0.160792	-1.11831	0.324141	0.550024	0.827077	0.704967	0.965795	1.14038	0.27619	0.645088	1.68941	0.0108303	0.0476965	1.39201	0.104615	0.347483
KEGG GAP JUNCTION	0.706316	0.910389	1	0.720383	0.892826	1	1.22645	0.158499	0.952377	1.34716	0.0787132	0.566548	-1.5449	0.00475436	0.0214635	-1.67929	0.00123686	0.00705962	-0.933899	0.578809	0.81496	-0.839411	0.727124	0.866043	-1.04555	0.367416	0.825239	-1.35176	0.0915225	0.356432	1.24826	0.0977444	0.219976	1.30537	0.116873	0.377076
KEGG GLYCINE SERINE AND THREONINE METABOLISM	1.53995	0.00339511	0.0642768	1.45837	0.0411392	0.432868	-1.26775	0.170639	0.960629	-1.30714	0.146962	0.688695	1.11252	0.286929	0.447451	1.5387	0.0268671	0.0805353	1.31898	0.133961	0.42769	-1.15166	0.29509	0.515565	0.764089	0.797648	0.983909	-1.25328	0.185119	0.532187	-0.659543	0.911932	0.969848	-0.832374	0.719418	0.91372
KEGG GLYCOSAMINOGLYCAN BIOSYNTHESIS CHONDROITIN SULFATE	0.644969	0.90771	1	-1.11283	0.318096	0.802635	-0.9728	0.513442	0.991099	1.06283	0.397847	0.849705	-1.95191	0.000173913	0.00278502	-1.61473	0.0155264	0.0509315	0.96428	0.495524	0.758571	NA	NA	NA	-1.39737	0.102849	0.531231	NA	NA	NA	1.26187	0.162449	0.31263	NA	NA	NA
KEGG GLYCOSAMINOGLYCAN BIOSYNTHESIS HEPARAN SULFATE	-1.11592	0.325024	0.879518	-1.37067	0.102379	0.559785	1.02627	0.448389	0.991099	1.10327	0.35424	0.83383	-2.00089	0.000171674	0.00278502	-1.76995	0.00136519	0.00755197	-1.41986	0.0786453	0.327641	NA	NA	NA	-1.74726	0.00863974	0.15403	-1.44431	0.081295	0.328908	-0.522062	0.983259	0.994905	-0.792994	0.761506	0.938706
KEGG GLYCOSAMINOGLYCAN DEGRADATION	-1.37803	0.101134	0.576465	-1.47748	0.0652499	0.492144	1.31791	0.146135	0.922222	1.21658	0.250237	0.798613	-1.62602	0.0127023	0.0458755	-1.45133	0.0586626	0.151255	1.76388	0.0121457	0.112398	NA	NA	NA	0.79427	0.728608	0.9769	NA	NA	NA	1.89657	0.00456343	0.0250989	NA	NA	NA
KEGG GLYCOSYLPHOSPHATIDYLINOSITOL GPI ANCHOR BIOSYNTHESIS	0.461034	0.994907	1	0.569171	0.96519	1	0.938601	0.563396	0.991099	0.644305	0.920632	1	0.90114	0.608073	0.735591	-1.32907	0.116445	0.250275	-0.734672	0.830518	0.92918	-1.64218	0.0116919	0.0813421	-0.84572	0.66747	0.960055	-1.47039	0.066474	0.303636	-1.27785	0.156277	0.303543	-1.68906	0.00627615	0.0418275
KEGG HOMOLOGOUS RECOMBINATION	0.410775	0.998874	1	0.525179	0.985532	1	-0.963017	0.517295	0.991099	-1.06072	0.38234	0.842501	2.05741	0.000239464	0.00278502	2.21943	0.000241429	0.00268997	0.570443	0.96629	0.984946	-0.956475	0.518937	0.733616	-0.775478	0.765804	0.978909	-1.20518	0.236785	0.600654	-1.40261	0.0750694	0.183675	-1.15252	0.280405	0.589186
KEGG INSULIN SIGNALING PATHWAY	1.51896	0.00112537	0.0357269	1.22367	0.143884	0.623074	-0.942777	0.563535	0.991099	-1.13567	0.206172	0.762014	-1.21024	0.113041	0.231279	-1.07159	0.308474	0.490095	1.21266	0.135597	0.42769	0.937064	0.567243	0.775976	-0.956969	0.533386	0.920583	0.786789	0.862392	0.981323	1.35219	0.02537	0.0836356	1.03317	0.401165	0.697648
KEGG LONG TERM DEPRESSION	0.781537	0.804145	1	1.05577	0.408789	0.879801	0.858296	0.692348	1	1.08362	0.344452	0.830108	-1.46786	0.0188558	0.0621542	-1.05237	0.368821	0.555514	-0.862955	0.699925	0.880763	0.870479	0.652131	0.823897	-1.3726	0.0747069	0.46076	-0.764581	0.820264	0.966645	1.51663	0.0197195	0.0704987	1.21064	0.212849	0.518383
KEGG MELANOGENESIS	1.04228	0.429556	0.933246	0.948113	0.574359	0.976152	1.08645	0.316185	0.96497	1.32435	0.0855597	0.572821	-1.36788	0.0356134	0.0973121	-1.17599	0.166565	0.329075	-0.929886	0.589403	0.817489	1.25635	0.142196	0.326648	-1.02285	0.399333	0.850074	-1.16477	0.233924	0.596417	1.46109	0.0164694	0.064326	1.43221	0.0516287	0.219475
KEGG MISMATCH REPAIR	-0.609105	0.950621	1	-0.877225	0.626629	0.991649	-1.00725	0.467415	0.991099	-1.11076	0.33658	0.830108	2.17987	0.000235183	0.00278502	2.27885	0.000240674	0.00268997	0.617149	0.928191	0.970492	-1.01449	0.4485	0.673096	-0.934087	0.543605	0.927631	-0.931958	0.549494	0.831712	-1.26285	0.172046	0.324809	-0.8584	0.669617	0.886813
KEGG N GLYCAN BIOSYNTHESIS	-0.913854	0.591525	1	-1.11179	0.277531	0.763272	0.98907	0.488055	0.991099	0.94101	0.547715	0.908195	-1.60244	0.00850142	0.0336278	-1.71567	0.00130698	0.00732991	-0.879202	0.647742	0.859343	-1.12713	0.305509	0.528013	-1.18754	0.219904	0.655118	-1.50297	0.0450689	0.244103	1.04562	0.34906	0.540642	-1.28593	0.117175	0.377076
KEGG NUCLEOTIDE EXCISION REPAIR	0.542859	0.988921	1	-0.737597	0.906593	1	-0.607125	0.98073	1	-0.525896	0.996757	1	1.94671	0.000248447	0.00278502	1.9767	0.000256937	0.00268997	-0.772141	0.80214	0.914764	-1.26762	0.158717	0.348465	0.859121	0.663946	0.960055	-1.14232	0.274991	0.645088	-1.29313	0.122201	0.255296	-1.1448	0.246081	0.557082
KEGG OOCYTE MEIOSIS	0.983325	0.530733	1	-0.886292	0.729987	1	-0.77359	0.932327	1	-0.918739	0.617874	0.937725	1.32078	0.0324786	0.091145	1.50818	0.0056313	0.023153	-1.21078	0.146337	0.445849	1.07724	0.319027	0.544189	-1.23101	0.137067	0.554586	-0.753828	0.890211	0.987877	1.0757	0.27069	0.453111	1.11828	0.2846	0.589751
KEGG PPAR SIGNALING PATHWAY	1.61832	0.000384517	0.0186741	1.69846	0.000130941	0.0192666	0.690189	0.932093	1	0.771339	0.826336	1	0.680607	0.981828	0.992985	-0.793845	0.840891	0.917816	1.08814	0.317481	0.635906	0.721253	0.910975	0.971839	0.800186	0.806887	0.988911	0.889794	0.611361	0.864011	0.778264	0.882558	0.950447	-1.34505	0.0706116	0.266403
KEGG PROTEIN EXPORT	0.373351	0.99914	1	-1.08276	0.349889	0.838681	1.10814	0.355055	0.965007	1.08814	0.367328	0.83596	-1.60387	0.0147212	0.0515241	-1.78198	0.00187394	0.00954217	-1.08999	0.347646	0.659651	-1.17289	0.277464	0.493156	-1.34644	0.127218	0.537922	-0.887029	0.609827	0.864011	-0.972371	0.507627	0.680624	-0.663826	0.908344	1
KEGG RIG I LIKE RECEPTOR SIGNALING PATHWAY	-1.03334	0.378741	0.909436	-1.36159	0.0749064	0.506257	-1.46915	0.0322356	0.809491	-1.54913	0.0207303	0.421013	-1.79521	0.000323939	0.00278822	-1.6751	0.00175691	0.00913742	1.21627	0.183866	0.49695	-1.05103	0.399059	0.627151	0.738632	0.881563	0.992947	1.23615	0.171335	0.507923	1.01094	0.417033	0.603119	1.45804	0.0543386	0.228178
KEGG SNARE INTERACTIONS IN VESICULAR TRANSPORT	-1.36142	0.0887067	0.551384	-1.41269	0.0660746	0.492144	0.692468	0.900144	1	0.823291	0.725696	0.979157	-1.774	0.00085034	0.00527767	-1.73507	0.00199038	0.0100095	-0.979164	0.481885	0.758571	-1.02928	0.42376	0.651368	-1.58169	0.0291223	0.289376	0.874158	0.618982	0.871096	-0.723669	0.866952	0.941441	-0.739881	0.862416	0.987923
KEGG SPHINGOLIPID METABOLISM	-0.985746	0.465267	0.960635	-0.978652	0.484574	0.929709	1.01855	0.451763	0.991099	1.13482	0.297312	0.821329	-1.67807	0.00253721	0.0127991	-1.73306	0.00196592	0.00996887	1.02415	0.414791	0.71496	1.1473	0.264469	0.482383	0.926152	0.564368	0.927631	1.44593	0.0777854	0.322636	0.705391	0.936066	0.979689	0.83489	0.684332	0.900529
KEGG T CELL RECEPTOR SIGNALING PATHWAY	-1.21594	0.116793	0.603971	-1.17325	0.169426	0.648277	0.648769	0.984447	1	0.833726	0.753466	0.987545	-1.34153	0.0433241	0.113646	-1.31196	0.0572421	0.148854	0.821681	0.829663	0.92918	1.3865	0.065786	0.208038	-0.811321	0.844418	0.990798	1.54433	0.0271845	0.171313	1.9946	0.000558659	0.00960416	1.94369	0.000154488	0.00292644
KEGG TGF BETA SIGNALING PATHWAY	1.16656	0.240656	0.800039	1.31333	0.084981	0.527354	1.32603	0.0797052	0.87672	1.5068	0.0143149	0.361296	-1.609	0.00206022	0.010696	-1.53133	0.00737554	0.0284052	1.223	0.154456	0.456494	1.14808	0.245843	0.462261	0.978855	0.479928	0.897584	-1.31605	0.116525	0.405047	-0.764027	0.86464	0.941441	1.17387	0.230295	0.540438
KEGG TRYPTOPHAN METABOLISM	1.59696	0.000848776	0.0305833	1.44588	0.0464614	0.441845	1.38502	0.0740069	0.870165	1.22954	0.215874	0.772594	1.03894	0.376284	0.535216	0.704922	0.93669	0.96361	1.378	0.100792	0.368286	-1.61322	0.0154002	0.0915466	0.837815	0.701988	0.965022	-1.0209	0.434806	0.769745	0.915625	0.583071	0.746376	-0.676386	0.922416	1
REACTOME A TETRASACCHARIDE LINKER SEQUENCE IS REQUIRED FOR GAG SYNTHESIS	-0.904274	0.590313	1	-0.919605	0.570505	0.976152	-1.34398	0.112986	0.906723	-1.44042	0.0656202	0.566548	-1.64572	0.007897	0.0317408	-1.62801	0.0107509	0.037924	-0.661611	0.918248	0.967976	-0.969439	0.510916	0.726471	-1.3414	0.126331	0.537922	-1.2197	0.236151	0.600567	0.8042	0.770206	0.887443	-0.692044	0.883902	0.992468
REACTOME ACTIVATED PKN1 STIMULATES TRANSCRIPTION OF AR ANDROGEN RECEPTOR REGULATED GENES KLK2 AND KLK3	1.06197	0.424852	0.931929	0.787279	0.7547	1	-1.00305	0.472014	0.991099	-1.19812	0.242359	0.796219	1.59491	0.0068268	0.0278892	1.5524	0.0161002	0.0525306	NA	NA	NA	NA	NA	NA	NA	NA	NA	NA	NA	NA	NA	NA	NA	NA	NA	NA
REACTOME ACTIVATION OF ANTERIOR HOX GENES IN HINDBRAIN DEVELOPMENT DURING EARLY EMBRYOGENESIS	0.954089	0.570417	1	0.723616	0.889246	1	0.982603	0.48475	0.991099	1.11003	0.295517	0.821329	2.00548	0.000273523	0.00278502	1.70051	0.00028547	0.00268997	-0.837505	0.746965	0.898363	-0.445674	0.99832	0.999248	0.76282	0.868971	0.990877	-1.30168	0.13556	0.444591	-1.14387	0.25809	0.439914	-0.610848	0.992614	1
REACTOME ACTIVATION OF IRF3 IRF7 MEDIATED BY TBK1 IKK EPSILON	-0.673021	0.880294	1	-0.722576	0.831591	1	-1.18707	0.280763	0.963258	-1.14392	0.315252	0.830108	-1.64672	0.00873362	0.0343284	-1.75361	0.00436605	0.0189092	NA	NA	NA	NA	NA	NA	NA	NA	NA	NA	NA	NA	NA	NA	NA	NA	NA	NA
REACTOME ACTIVATION OF THE PRE REPLICATIVE COMPLEX	-1.13745	0.276183	0.840591	-1.27301	0.144227	0.623074	-1.19263	0.229815	0.963258	-1.50694	0.0369293	0.498908	2.22181	0.000243902	0.00278502	2.45392	0.000246488	0.00268997	-0.834692	0.709122	0.882688	-0.972988	0.501879	0.717812	1.33975	0.123132	0.537922	-1.13727	0.292165	0.657491	-1.26378	0.165823	0.315826	-1.49799	0.0344368	0.161696
REACTOME ANTIGEN ACTIVATES B CELL RECEPTOR BCR LEADING TO GENERATION OF SECOND MESSENGERS	-1.10204	0.341165	0.886235	-1.27972	0.157911	0.641583	-0.622479	0.941687	1	-0.943466	0.540789	0.908119	-1.42957	0.0499745	0.124288	-1.26496	0.154299	0.309871	1.41392	0.088651	0.346322	1.57049	0.0408213	0.154708	1.48979	0.0550569	0.399871	1.49783	0.0666667	0.303636	1.851	0.00288809	0.0191004	1.65484	0.0159272	0.0869692
REACTOME APC C MEDIATED DEGRADATION OF CELL CYCLE PROTEINS	-1.11986	0.222884	0.775097	-1.22849	0.121265	0.581345	-1.32927	0.0673007	0.854259	-1.51509	0.012219	0.340726	1.29227	0.0619687	0.14596	1.7999	0.00028547	0.00268997	-0.999659	0.442988	0.730518	-1.46839	0.0250479	0.115624	-1.19021	0.192745	0.627466	0.943742	0.524017	0.817986	-1.42969	0.0246052	0.0821911	0.898403	0.626209	0.868287
REACTOME APOPTOTIC CLEAVAGE OF CELLULAR PROTEINS	0.881421	0.65692	1	1.29721	0.140532	0.617801	-1.06047	0.387235	0.975356	-0.808705	0.751567	0.987545	1.10315	0.293931	0.45439	-0.978516	0.484743	0.66659	0.986596	0.46871	0.748343	1.71045	0.0144078	0.0905368	1.67653	0.0129534	0.197932	1.864	0.00686342	0.0667525	0.990802	0.450037	0.630051	0.915009	0.571658	0.835251
REACTOME APOPTOTIC EXECUTION PHASE	0.684396	0.905786	1	1.15637	0.278315	0.763272	-1.21627	0.184107	0.963258	-1.09051	0.321069	0.830108	1.13779	0.239748	0.396715	-0.900047	0.633518	0.790761	1.07936	0.333976	0.647867	1.74453	0.0105885	0.0781153	1.6574	0.0104104	0.172149	1.87412	0.00644567	0.0639462	0.881579	0.683043	0.830124	0.993293	0.463647	0.753285
REACTOME ARACHIDONIC ACID METABOLISM	1.13329	0.322528	0.879518	-0.95081	0.526874	0.957703	1.12018	0.314327	0.964568	1.30739	0.133453	0.649385	-0.9039	0.634454	0.756488	-1.1878	0.196645	0.365927	1.83802	0.00193424	0.0372047	0.775834	0.787879	0.902816	0.929559	0.560863	0.927631	1.15688	0.246679	0.617931	1.78408	0.00414001	0.0235423	1.5698	0.0237723	0.121568
REACTOME ASSEMBLY OF COLLAGEN FIBRILS AND OTHER MULTIMERIC STRUCTURES	0.826068	0.750753	1	0.856672	0.69411	1	-1.07711	0.319418	0.965007	-1.05321	0.364352	0.835574	-1.70592	0.00146867	0.00816947	-1.76192	0.000638876	0.00418017	1.28356	0.132806	0.42769	0.773318	0.791034	0.905367	0.743803	0.877913	0.992947	-0.739951	0.841902	0.96872	-0.913623	0.607401	0.766719	1.57235	0.0192178	0.101286
REACTOME BIOLOGICAL OXIDATIONS	1.45222	0.00279236	0.0556976	1.39053	0.0219137	0.359965	1.43551	0.0151392	0.668262	1.55513	0.00517967	0.192856	-0.878282	0.779058	0.856645	-1.04322	0.354278	0.54225	1.41675	0.0258303	0.173983	-1.02908	0.396698	0.625342	1.0569	0.332994	0.798971	0.976371	0.462556	0.779203	1.67433	0.001443	0.0121528	0.764387	0.8869	0.994754
REACTOME BIOSYNTHESIS OF THE N GLYCAN PRECURSOR DOLICHOL LIPID LINKED OLIGOSACCHARIDE LLO AND TRANSFER TO A NASCENT PROTEIN	0.719096	0.896636	1	0.930098	0.595357	0.978374	1.25854	0.133264	0.906723	1.20986	0.18878	0.749533	-1.36685	0.0455922	0.117791	-1.6502	0.0020265	0.0100254	-1.38185	0.056243	0.27501	-1.11663	0.292011	0.512466	-1.18439	0.196976	0.631472	-1.22046	0.176694	0.519202	-0.916028	0.620995	0.779317	-1.55587	0.00981432	0.0607078
REACTOME BRANCHED CHAIN AMINO ACID CATABOLISM	1.54433	0.00262276	0.0532659	1.45904	0.0424779	0.432868	1.06857	0.399267	0.978593	1.23751	0.222222	0.772594	1.1253	0.291657	0.451434	-0.655034	0.921955	0.95451	1.32659	0.137489	0.429987	-1.40634	0.089673	0.252432	-1.09112	0.348212	0.808319	-0.979825	0.48244	0.786025	-1.60197	0.015005	0.0599091	-1.1097	0.327914	0.629619
REACTOME CA DEPENDENT EVENTS	1.17673	0.264992	0.837891	-1.05539	0.366362	0.856122	-1.14564	0.27548	0.963258	-0.954605	0.52769	0.908119	-1.97491	0.000170068	0.00278502	-1.63639	0.00712038	0.0279015	-1.27606	0.144195	0.44369	1.15428	0.257639	0.47676	-1.22111	0.188254	0.625087	0.468745	0.997036	0.999101	1.45433	0.0394885	0.11382	1.34313	0.12886	0.396166
REACTOME CALNEXIN CALRETICULIN CYCLE	-0.86656	0.650794	1	-0.938635	0.542867	0.967195	1.26433	0.173882	0.960629	1.27813	0.168996	0.712334	-1.65968	0.00652361	0.0272585	-1.68338	0.00627225	0.0254444	1.03817	0.401369	0.703973	0.596884	0.949855	0.990534	0.641054	0.913234	0.99347	1.03573	0.397499	0.744475	1.11098	0.276507	0.460703	0.994873	0.463785	0.753285
REACTOME CARGO CONCENTRATION IN THE ER	0.790762	0.771104	1	0.874903	0.647275	0.99725	1.4439	0.0419355	0.809491	1.46205	0.0526124	0.565078	-1.61289	0.00898001	0.034857	-1.91725	0.000166722	0.00268997	-0.821182	0.719947	0.887359	-0.6812	0.876495	0.951658	0.86761	0.641761	0.957497	-0.737978	0.814329	0.966645	0.886429	0.631048	0.783828	0.850835	0.649602	0.87971
REACTOME CARGO TRAFFICKING TO THE PERICILIARY MEMBRANE	-0.928588	0.563158	1	-0.919462	0.577787	0.976152	0.509469	0.997193	1	-0.599982	0.9845	1	-1.45897	0.027045	0.0800428	-1.47221	0.0262221	0.0793838	-1.26445	0.143233	0.44369	-1.48286	0.0393013	0.151302	-1.3165	0.120032	0.535021	-0.761799	0.798255	0.966255	-1.32509	0.0907879	0.208233	-1.11709	0.281434	0.589186
REACTOME CASPASE ACTIVATION VIA EXTRINSIC APOPTOTIC SIGNALLING PATHWAY	0.998506	0.509107	1	0.813288	0.721386	1	1.02264	0.45641	0.991099	-0.682826	0.87987	1	-1.82331	0.000859845	0.00527767	-1.58327	0.0192373	0.061272	1.18776	0.244885	0.564235	1.32299	0.151428	0.338709	1.1811	0.257438	0.715749	1.72515	0.0212718	0.149034	1.3387	0.108108	0.237806	1.55792	0.0442323	0.19361
REACTOME CELL CELL JUNCTION ORGANIZATION	0.957579	0.559076	1	1.20124	0.221914	0.718487	0.876347	0.659982	0.994986	1.21336	0.198989	0.757506	1.50968	0.0115093	0.0420545	1.53677	0.00996499	0.0359854	-1.19863	0.18354	0.49695	0.789334	0.764965	0.889112	-0.768655	0.842722	0.990798	-1.48916	0.0537462	0.271988	-0.902706	0.630449	0.783828	1.19406	0.235757	0.543609
REACTOME CELL CYCLE MITOTIC	-0.939452	0.911111	1	-1.07032	0.166667	0.644175	-1.02774	0.328174	0.965007	-1.32888	0.00190042	0.16329	NA	NA	NA	2.30729	0.000494315	0.00351802	0.845438	0.950987	0.980516	-1.12667	0.173454	0.371306	1.1079	0.165835	0.597382	-0.769652	0.984928	0.999101	-1.26752	0.0183327	0.0688062	-0.766735	0.999379	1
REACTOME CELLULAR RESPONSE TO HYPOXIA	0.734387	0.879381	1	-1.76711	0.00104548	0.0686941	-0.906459	0.624403	0.991099	-0.786789	0.859243	1	0.790904	0.898768	0.936342	1.2315	0.11739	0.251079	-0.925546	0.585507	0.817068	-1.63943	0.00472929	0.0479826	-1.19955	0.188046	0.625087	0.916675	0.571124	0.84809	-1.02882	0.420105	0.604713	0.948381	0.538636	0.80781
REACTOME CIRCADIAN CLOCK	1.08536	0.361373	0.905512	-0.845129	0.764123	1	-0.884087	0.669338	0.996867	-0.87304	0.6882	0.968161	1.05279	0.348544	0.507344	0.873738	0.731641	0.849625	-0.699928	0.943091	0.975939	0.736582	0.89715	0.961303	0.832638	0.754019	0.978909	0.737448	0.871364	0.984817	1.4625	0.0211437	0.0735254	1.66553	0.00617387	0.041514
REACTOME CLASS I PEROXISOMAL MEMBRANE PROTEIN IMPORT	1.40059	0.055117	0.411518	1.26194	0.188626	0.661695	-0.745834	0.809398	1	0.755336	0.786169	0.998812	-0.974678	0.49397	0.643141	-1.39894	0.0806674	0.190996	-0.989263	0.47194	0.748343	-1.3861	0.107468	0.27913	-1.49028	0.0626389	0.420418	-0.771389	0.756962	0.941686	-1.69648	0.00441436	0.0247515	-1.609	0.0154812	0.085519
REACTOME CLATHRIN MEDIATED ENDOCYTOSIS	0.918632	0.655849	1	0.715968	0.931982	1	0.888262	0.683423	1	1.01172	0.426725	0.857346	-1.4615	0.00661058	0.0274559	-1.4376	0.0107876	0.0379438	0.903238	0.664363	0.870123	1.03877	0.365867	0.593925	-0.768838	0.925955	0.99347	1.55455	0.018666	0.135531	1.20688	0.0942982	0.213558	1.32171	0.0750662	0.27994
REACTOME COLLAGEN BIOSYNTHESIS AND MODIFYING ENZYMES	-1.156	0.198514	0.764061	-1.22675	0.134076	0.61378	-1.34669	0.0732687	0.870165	-1.64824	0.00404955	0.180934	-1.9184	0.000161212	0.00278502	-1.76841	0.000795039	0.00501328	-0.587054	0.992735	0.996264	0.651135	0.932631	0.983838	0.620975	0.982481	0.996841	-1.5255	0.0364848	0.213788	-1.14921	0.244948	0.424524	0.73904	0.842761	0.982567
REACTOME COLLAGEN CHAIN TRIMERIZATION	0.85756	0.696377	1	0.883415	0.643931	0.994843	-1.31766	0.108536	0.906723	-1.58549	0.014767	0.361296	-1.73192	0.00133846	0.00754627	-1.56354	0.0133202	0.0449049	-0.727836	0.876702	0.948218	-0.784202	0.74437	0.876404	-0.649722	0.944954	0.995291	-1.42166	0.0796728	0.324521	-1.37598	0.0752747	0.183675	-0.667389	0.930201	1
REACTOME COLLAGEN DEGRADATION	0.866192	0.696453	1	1.02972	0.443111	0.904853	-0.909756	0.613519	0.991099	-0.962787	0.505725	0.893821	-1.74236	0.00112794	0.0068224	-1.73342	0.000954654	0.00578017	0.855254	0.692686	0.879857	1.20663	0.214862	0.429724	1.08465	0.319793	0.794954	-0.87417	0.63935	0.876596	-1.0143	0.443873	0.622771	1.28589	0.153951	0.435703
REACTOME COLLAGEN FORMATION	-1.18847	0.135029	0.632534	-1.25002	0.10593	0.561871	-1.15415	0.19874	0.963258	-1.33807	0.0640214	0.566548	-1.84055	0.000314713	0.00278502	-1.86042	0.00015328	0.00268997	1.14316	0.229834	0.550179	0.879564	0.634244	0.817067	0.843455	0.747335	0.978909	-0.965453	0.491517	0.790931	-0.874191	0.69152	0.833846	1.51905	0.0243902	0.124114
REACTOME CONDENSATION OF PROPHASE CHROMOSOMES	-0.862126	0.667522	1	-1.02948	0.399371	0.877572	-1.25402	0.176284	0.960629	-1.42151	0.068487	0.566548	1.74613	0.000749438	0.00483834	1.62062	0.013217	0.0448051	-0.654579	0.910358	0.963071	-0.984102	0.492866	0.711187	0.611479	0.935541	0.994678	NA	NA	NA	-0.656021	0.915244	0.971409	-0.62905	0.93039	1
REACTOME COPI DEPENDENT GOLGI TO ER RETROGRADE TRAFFIC	-1.50462	0.00747791	0.100636	-1.34355	0.0563295	0.476667	1.10648	0.284944	0.963258	0.860452	0.713469	0.978893	-1.60253	0.00157282	0.00859533	-1.74621	0.000305344	0.00268997	1.19162	0.170999	0.476686	0.76554	0.862725	0.945557	0.891049	0.66451	0.960055	-0.909616	0.598762	0.860618	1.15507	0.175118	0.329453	0.786534	0.811759	0.97016
REACTOME COPI MEDIATED ANTEROGRADE TRANSPORT	-1.38978	0.0277778	0.274582	-1.2953	0.0722526	0.506257	1.0535	0.363239	0.966041	1.20099	0.171804	0.718012	-2.01731	0.000156323	0.00278502	-2.24474	0.000152114	0.00268997	-0.677202	0.969242	0.984946	1.31691	0.0972549	0.265124	-1.03256	0.385836	0.843974	-1.1645	0.22386	0.584124	1.08888	0.252893	0.434105	1.05672	0.373795	0.676235
REACTOME COPII MEDIATED VESICLE TRANSPORT	0.649718	0.950461	1	0.711134	0.895101	1	1.22184	0.172062	0.960629	1.24859	0.155437	0.700952	-1.89505	0.000160823	0.00278502	-2.03111	0.000158028	0.00268997	-0.726694	0.907964	0.962787	-0.889482	0.640857	0.818173	0.808293	0.777534	0.978909	0.49669	0.998107	0.999101	1.20271	0.150943	0.296125	-0.696149	0.952429	1
REACTOME CYCLIN A B1 B2 ASSOCIATED EVENTS DURING G2 M TRANSITION	-0.942087	0.531767	1	-1.29073	0.149634	0.623661	-1.3986	0.076341	0.87672	-1.59248	0.020614	0.421013	1.84431	0.00213726	0.0110193	2.06903	0.000242014	0.00268997	-0.692476	0.878378	0.948218	-0.658245	0.882403	0.951658	1.04437	0.39801	0.850074	-1.00159	0.454936	0.779203	-0.815717	0.729149	0.862285	-1.30823	0.132403	0.402271
REACTOME DEACTIVATION OF THE BETA CATENIN TRANSACTIVATING COMPLEX	-0.807797	0.792639	1	-1.04541	0.37068	0.857644	-1.49807	0.0274314	0.806339	-1.33717	0.10212	0.601158	1.58197	0.00992802	0.0374858	1.60203	0.0107116	0.0378952	0.690282	0.913826	0.965117	0.615237	0.948937	0.990534	1.14822	0.2554	0.715749	-0.810211	0.730023	0.921263	0.999559	0.433707	0.616802	0.484165	0.994833	1
REACTOME DEADENYLATION DEPENDENT MRNA DECAY	-0.852922	0.733722	1	-0.921229	0.591115	0.978374	-0.5805	0.996974	1	0.346879	1	1	1.79208	0.00076746	0.00490387	1.88932	0.000525901	0.00363648	-1.12207	0.270794	0.583337	-0.951247	0.531929	0.745466	0.757644	0.855631	0.990877	-0.912901	0.583421	0.854063	-1.29391	0.111501	0.242663	-0.620932	0.990521	1
REACTOME DEADENYLATION OF MRNA	-1.35248	0.103989	0.582577	-1.41231	0.0780328	0.506257	-0.782139	0.779015	1	-0.480327	0.993858	1	1.59706	0.0204227	0.0660588	1.82769	0.00121124	0.00698616	-1.38542	0.0946378	0.358544	-0.562279	0.966519	0.998292	0.923029	0.554428	0.927631	-0.875324	0.626967	0.876596	-1.01049	0.457937	0.638624	0.714129	0.838181	0.982567
REACTOME DEFECTIVE B4GALT7 CAUSES EDS PROGEROID TYPE	-0.858293	0.648483	1	-0.92193	0.555822	0.972654	-1.27234	0.186608	0.963258	-1.41239	0.0827163	0.566548	-1.57099	0.0197518	0.0645951	-1.58485	0.0205832	0.0648957	0.912424	0.561168	0.80503	NA	NA	NA	1.67712	0.0144469	0.208095	NA	NA	NA	0.923459	0.545178	0.709785	-0.741357	0.817629	0.971934
REACTOME DEPOSITION OF NEW CENPA CONTAINING NUCLEOSOMES AT THE CENTROMERE	-0.683819	0.956942	1	-1.06531	0.343306	0.831131	-1.01422	0.439845	0.980653	-1.26375	0.157955	0.70293	2.174	0.000255493	0.00278502	2.16067	0.000258131	0.00268997	-0.914061	0.57602	0.814945	NA	NA	NA	0.597684	0.952808	0.995291	NA	NA	NA	-0.805356	0.74174	0.86724	0.775055	0.75256	0.931551
REACTOME DISEASES ASSOCIATED WITH GLYCOSAMINOGLYCAN METABOLISM	-1.04168	0.370795	0.905656	-0.908707	0.597797	0.978414	-1.42574	0.0498753	0.809491	-1.45459	0.0510599	0.561771	-1.69482	0.00285187	0.0141009	-1.84505	0.00049334	0.00351802	1.36033	0.101124	0.368286	-0.783306	0.757245	0.884361	1.7132	0.00657633	0.13278	0.704281	0.870189	0.984817	0.955441	0.510174	0.682342	0.956832	0.508835	0.788045
REACTOME DISEASES OF CARBOHYDRATE METABOLISM	1.01945	0.478901	0.977215	-1.04394	0.387905	0.871546	-0.844173	0.683646	1	-0.939863	0.541023	0.908119	-1.5177	0.0223653	0.0695807	-1.55716	0.0210331	0.0659725	1.69845	0.0123799	0.112717	1.14989	0.274088	0.492769	-0.59456	0.963275	0.995559	1.51355	0.0632826	0.298378	1.3087	0.116573	0.249735	-0.700861	0.872946	0.988423
REACTOME DISEASES OF DNA REPAIR	-0.814959	0.764885	1	-0.768915	0.833394	1	-1.25001	0.167384	0.960629	-1.36902	0.0888092	0.572821	2.11324	0.000242954	0.00278502	2.30811	0.00024975	0.00268997	-0.72749	0.866529	0.945256	-1.17477	0.267763	0.484761	-0.888765	0.614208	0.94603	-1.17377	0.258065	0.628428	-1.38294	0.0791377	0.190659	-1.49975	0.0372493	0.171016
REACTOME DISEASES OF GLYCOSYLATION	1.05628	0.394082	0.916771	1.11253	0.294963	0.781641	-1.04324	0.349304	0.965007	0.93412	0.581983	0.923402	-1.69491	0.000455581	0.00360095	-1.72082	0.000597997	0.00404312	0.926823	0.596886	0.825838	0.992857	0.456255	0.679499	1.33037	0.0563466	0.401076	-1.5113	0.0253611	0.1638	1.04234	0.340644	0.534026	-0.884278	0.735312	0.92246
REACTOME DISEASES OF METABOLISM	1.31316	0.0290439	0.281528	1.17778	0.165393	0.643707	1.01444	0.416719	0.979948	1.11325	0.238873	0.789413	-1.62105	0.000143968	0.00278502	-1.71294	0.000139899	0.00268997	1.41375	0.0143869	0.123052	0.992603	0.452171	0.675483	1.19662	0.11366	0.535021	-1.23877	0.115784	0.404236	1.19849	0.0644172	0.164554	-0.920715	0.693243	0.905335
REACTOME DNA DAMAGE BYPASS	-1.02348	0.392174	0.916771	-1.15907	0.218789	0.714775	-1.07211	0.348853	0.965007	-1.32738	0.102275	0.601158	1.61958	0.00553598	0.0245475	1.9016	0.00025641	0.00268997	0.634628	0.956053	0.981093	-0.892038	0.619424	0.806618	-0.871844	0.650179	0.960055	1.1843	0.220126	0.578114	-1.08185	0.340888	0.534026	-0.842438	0.745112	0.928469
REACTOME DNA METHYLATION	0.581326	0.959497	1	-0.559474	0.981215	1	-1.05082	0.414059	0.979948	-1.17679	0.264253	0.808441	1.82033	0.000731172	0.00481159	1.69706	0.00684597	0.0271386	NA	NA	NA	NA	NA	NA	NA	NA	NA	NA	NA	NA	NA	NA	NA	NA	NA	NA
REACTOME DNA REPLICATION	-0.56963	1	1	-0.850612	0.855517	1	-0.930025	0.621393	0.991099	-1.2511	0.0778476	0.566548	1.9447	0.00030349	0.00278502	2.3317	0.000313087	0.00268997	-1.06031	0.325922	0.642174	-1.40963	0.0322983	0.137976	0.853869	0.772072	0.978909	0.746773	0.928412	0.999101	-1.35394	0.0413434	0.118848	-0.823635	0.881468	0.992256
REACTOME DNA REPLICATION PRE INITIATION	0.627479	0.983349	1	-0.568934	1	1	-0.827638	0.843461	1	-1.12665	0.22448	0.772594	1.8117	0.000286041	0.00278502	2.09992	0.000296384	0.00268997	-1.062	0.337201	0.653001	-1.40078	0.0490529	0.172482	-0.850521	0.734978	0.978909	1.08435	0.303632	0.668658	-1.29589	0.0850597	0.198473	0.773132	0.837598	0.982567
REACTOME DNA STRAND ELONGATION	-1.11295	0.303064	0.868496	-1.24098	0.173151	0.652766	-1.25544	0.174617	0.960629	-1.4436	0.0562276	0.566548	2.3555	0.000243902	0.00278502	2.54557	0.000246488	0.00268997	1.16623	0.252463	0.571134	-0.802242	0.734901	0.871856	1.27339	0.168163	0.599605	-0.90837	0.573621	0.84809	-0.533093	0.985526	0.994905	-0.730716	0.873602	0.988423
REACTOME DUAL INCISION IN GG NER	-0.514448	0.999595	1	-0.955977	0.505618	0.944223	-0.669882	0.948244	1	-0.551854	0.993335	1	1.93012	0.000494927	0.00368868	1.89167	0.000511117	0.00355445	-0.626888	0.953175	0.980979	-1.20754	0.217369	0.431928	0.875512	0.633618	0.955016	-0.871235	0.643464	0.876596	-1.15674	0.25408	0.434758	-0.92101	0.586916	0.844947
REACTOME E2F MEDIATED REGULATION OF DNA REPLICATION	0.925731	0.602506	1	-0.872384	0.631285	0.991649	0.647828	0.906227	1	-1.24802	0.204113	0.759979	1.62276	0.0178613	0.0596655	1.89455	0.00119847	0.0069454	-1.27591	0.164972	0.469349	-0.670041	0.87952	0.951658	-0.822497	0.699737	0.963088	-0.823768	0.690958	0.907392	-0.997845	0.477192	0.65614	-1.04551	0.410267	0.703778
REACTOME EPHRIN SIGNALING	-1.46363	0.0516009	0.400265	-1.17001	0.266828	0.763272	-0.981803	0.497688	0.991099	-0.97503	0.499467	0.886313	-1.71732	0.00418264	0.0193739	-1.3177	0.127623	0.268582	-1.40137	0.0966529	0.360136	NA	NA	NA	-0.973266	0.49003	0.902926	NA	NA	NA	1.58043	0.0321774	0.0992988	NA	NA	NA
REACTOME ER QUALITY CONTROL COMPARTMENT ERQC	-0.855978	0.663587	1	-0.884926	0.617008	0.984569	1.08809	0.382784	0.975356	1.08474	0.379041	0.84125	-1.60812	0.0153123	0.0531816	-1.67186	0.00874786	0.032261	0.895936	0.583903	0.817068	-0.482758	0.985198	0.998976	-0.6522	0.903525	0.99347	NA	NA	NA	1.1266	0.279713	0.464609	0.815805	0.692323	0.905278
REACTOME ER TO GOLGI ANTEROGRADE TRANSPORT	-1.08426	0.224719	0.775097	-1.1114	0.20993	0.704181	1.21334	0.127334	0.906723	1.29989	0.0751263	0.566548	-2.11432	0.000150195	0.00278502	-2.29353	0.000147341	0.00268997	-0.786736	0.896718	0.9578	0.995524	0.437395	0.661189	-0.89647	0.668513	0.960055	-0.889308	0.664329	0.886303	1.24194	0.0746382	0.18328	0.791667	0.840886	0.982567
REACTOME ESR MEDIATED SIGNALING	1.04543	0.407371	0.916864	1.14331	0.233608	0.727868	0.773468	0.947259	1	-0.924642	0.646358	0.947746	1.27371	0.0293934	0.085229	1.33088	0.0150301	0.0494367	1.03	0.373883	0.683358	0.823838	0.83641	0.932109	1.41012	0.0207776	0.234725	-0.820307	0.807082	0.966645	-0.839335	0.80437	0.906557	0.837459	0.773326	0.945379
REACTOME ESTROGEN DEPENDENT NUCLEAR EVENTS DOWNSTREAM OF ESR MEMBRANE SIGNALING	0.86328	0.673639	1	1.092	0.374727	0.857644	0.736891	0.823743	1	-0.673907	0.894737	1	-1.51745	0.0295286	0.085229	-1.47801	0.0430712	0.119402	-0.846932	0.675447	0.87714	-1.13962	0.313305	0.537462	0.802646	0.727761	0.9769	-0.789082	0.733382	0.924324	1.66785	0.0196513	0.0704987	-0.600996	0.956503	1
REACTOME EXTENSION OF TELOMERES	-0.817535	0.800909	1	-0.948332	0.529387	0.958388	-1.26496	0.13386	0.906723	-1.1505	0.247994	0.797529	2.45963	0.000251572	0.00278502	2.55452	0.000261506	0.00268997	0.885124	0.637975	0.857469	-1.53131	0.0222074	0.106678	1.04627	0.381822	0.837805	-1.14319	0.259531	0.628428	-1.35185	0.0794118	0.190659	-1.34021	0.0804991	0.294878
REACTOME FATTY ACID METABOLISM	1.65819	0.000110084	0.00742983	1.30553	0.0583428	0.481114	1.15485	0.19496	0.963258	1.31316	0.0660287	0.566548	0.931052	0.680483	0.794411	-0.918004	0.662323	0.803636	1.62186	0.00151188	0.032643	-1.12243	0.24222	0.458992	-0.770813	0.928361	0.99347	0.780109	0.88911	0.987877	-0.849051	0.785657	0.894003	-1.06035	0.308962	0.615997
REACTOME FLT3 SIGNALING IN DISEASE	0.681949	0.883727	1	0.62976	0.932388	1	1.20236	0.237819	0.963258	0.737917	0.816844	1	-1.71946	0.00222222	0.0113479	-1.57907	0.0175768	0.0567399	-0.782312	0.77832	0.909536	1.00706	0.432498	0.659169	-0.92056	0.559832	0.927631	1.34946	0.122942	0.41862	-0.678486	0.904581	0.968478	1.04594	0.400589	0.697648
REACTOME FORMATION OF FIBRIN CLOT CLOTTING CASCADE	-1.1564	0.284882	0.857717	-0.925501	0.557295	0.972654	0.842297	0.686493	1	1.10791	0.349044	0.831306	-1.1068	0.306078	0.466862	-1.25983	0.148383	0.29997	1.70586	0.0111516	0.108536	1.50052	0.0583924	0.190853	1.11609	0.298127	0.768419	1.04736	0.38343	0.731804	2.06846	0.00182537	0.0141565	1.82732	0.00170648	0.0166302
REACTOME FORMATION OF INCISION COMPLEX IN GG NER	0.582008	0.976903	1	-0.509897	1	1	0.487576	0.998585	1	0.723017	0.878331	1	1.87711	0.000496894	0.00368868	1.534	0.0220796	0.0687234	-0.748114	0.845318	0.93382	-1.17395	0.252651	0.470802	-0.724482	0.867458	0.990877	-0.823835	0.712207	0.918445	-1.38244	0.0605534	0.158055	-1.39504	0.0612918	0.245695
REACTOME FORMATION OF TC NER PRE INCISION COMPLEX	-0.512866	1	1	-0.856929	0.718273	1	0.480487	0.999299	1	-0.457605	1	1	1.48692	0.0166498	0.0568376	1.41132	0.0429769	0.119402	-1.28099	0.13116	0.425516	-1.5512	0.0205996	0.106678	-1.13777	0.268693	0.729948	-0.868162	0.653448	0.883583	-1.82933	0.000519818	0.00960416	-1.24131	0.145828	0.425538
REACTOME FORMATION OF THE BETA CATENIN TCF TRANSACTIVATING COMPLEX	0.781256	0.800077	1	0.686204	0.903803	1	-0.78447	0.835575	1	0.841352	0.71374	0.978893	1.72969	0.00259471	0.0130363	1.70049	0.00340492	0.0154619	1.02011	0.417492	0.717426	1.27572	0.163012	0.354405	1.24204	0.168	0.599605	-1.11611	0.319084	0.681711	0.898661	0.626175	0.782175	0.529137	0.983369	1
REACTOME G ALPHA Q SIGNALLING EVENTS	1.1538	0.233036	0.78404	1.18838	0.18459	0.656886	1.33847	0.0518922	0.809491	1.41814	0.0288838	0.467583	-1.41838	0.00584112	0.0251966	-1.3217	0.026342	0.079549	-1.25877	0.0744152	0.318238	1.01885	0.406683	0.633775	-1.18507	0.135919	0.551897	-0.796206	0.821205	0.966645	1.21936	0.100984	0.225384	1.41687	0.0425691	0.189543
REACTOME G ALPHA S SIGNALLING EVENTS	0.882999	0.679107	1	1.05954	0.396131	0.877572	1.5402	0.0061739	0.475344	1.65668	0.00171262	0.159417	-1.22666	0.0970387	0.205539	-1.14424	0.193524	0.36178	-0.918771	0.61273	0.836778	1.88015	0.00124039	0.0161085	0.77414	0.912726	0.99347	-1.04504	0.384629	0.732696	1.51374	0.0148967	0.0596975	1.12138	0.296743	0.603416
REACTOME G PROTEIN BETA GAMMA SIGNALLING	0.746064	0.808883	1	-0.931484	0.546641	0.967195	-0.667534	0.908079	1	-0.747493	0.809868	1	-1.29146	0.124703	0.251019	-0.992645	0.465989	0.646946	0.890675	0.614973	0.836778	1.73491	0.0153588	0.0915466	-0.8915	0.613325	0.94603	1.05279	0.376946	0.726792	1.62405	0.0218295	0.0751828	1.29622	0.170425	0.459638
REACTOME G0 AND EARLY G1	-1.2916	0.144928	0.652758	-1.3152	0.126117	0.590244	-0.981711	0.49364	0.991099	-1.30413	0.145048	0.683624	1.67107	0.0100575	0.0378598	1.78637	0.00217286	0.0104936	-1.07179	0.360819	0.675563	-1.09213	0.361975	0.590558	0.733873	0.839012	0.990798	-0.926587	0.555214	0.835321	-1.334	0.117279	0.250022	-0.949542	0.532238	0.806161
REACTOME G1 S SPECIFIC TRANSCRIPTION	-1.36147	0.0962151	0.568636	-1.50346	0.041258	0.432868	-0.640989	0.940887	1	-1.07016	0.36535	0.835574	1.50909	0.0310993	0.0884698	1.70407	0.0066047	0.0264405	-0.988568	0.47018	0.748343	-0.908938	0.582153	0.785342	0.704843	0.869297	0.990877	-0.659158	0.895718	0.990058	-1.38086	0.0868085	0.20168	-0.842633	0.695101	0.905592
REACTOME G2 M DNA DAMAGE CHECKPOINT	-0.590653	1	1	-0.825743	0.817123	1	-0.674172	0.978698	1	-0.849463	0.737806	0.987429	1.74004	0.000269034	0.00278502	2.04051	0.000275255	0.00268997	-1.03878	0.37982	0.687207	-0.81272	0.770221	0.89255	-0.994338	0.449085	0.880423	-0.668947	0.932333	0.999101	-1.37928	0.0538145	0.144669	-0.998608	0.452996	0.745229
REACTOME GAMMA CARBOXYLATION HYPUSINE FORMATION AND ARYLSULFATASE ACTIVATION	-1.62552	0.00806452	0.105977	-1.24693	0.175052	0.652766	-0.851111	0.676397	1	-0.835163	0.704566	0.978856	-1.64353	0.00457705	0.0209669	-1.59962	0.010101	0.0361557	0.659597	0.930481	0.970492	-1.03645	0.414518	0.643385	-0.901088	0.598833	0.939846	-1.03425	0.413775	0.752483	-0.683261	0.900056	0.965433	1.16833	0.266703	0.573966
REACTOME GAP FILLING DNA REPAIR SYNTHESIS AND LIGATION IN GG NER	-0.797275	0.757148	1	-1.10153	0.328266	0.812108	-0.768764	0.792231	1	-0.807063	0.722259	0.979157	1.97829	0.000238834	0.00278502	2.03058	0.000242248	0.00268997	0.817049	0.700554	0.880763	-1.31522	0.156298	0.345987	0.806249	0.714427	0.973847	0.801002	0.722235	0.920142	-1.20961	0.215912	0.385993	-0.553583	0.979915	1
REACTOME GENE AND PROTEIN EXPRESSION BY JAK STAT SIGNALING AFTER INTERLEUKIN 12 STIMULATION	1.25279	0.178664	0.73593	0.959317	0.540215	0.967195	0.774201	0.798489	1	0.82534	0.717226	0.979157	-1.25217	0.145238	0.27927	-1.5605	0.0160889	0.0525306	1.62751	0.0256959	0.173983	1.28285	0.162234	0.353503	0.902347	0.591751	0.939846	1.58464	0.0422981	0.23268	1.81361	0.00363769	0.0218307	1.56107	0.0394589	0.179564
REACTOME GENE SILENCING BY RNA	0.677465	0.944431	1	0.319775	1	1	-0.628644	0.998055	1	-0.840041	0.783731	0.9985	1.48645	0.00510493	0.0227984	1.80518	0.000291886	0.00268997	-1.06006	0.35045	0.660933	0.566846	0.994086	0.998976	1.50605	0.0227318	0.251816	-0.745497	0.854344	0.976769	-1.3093	0.0891888	0.205905	-0.90714	0.635414	0.868708
REACTOME GENERATION OF SECOND MESSENGER MOLECULES	-1.40742	0.0885294	0.551384	-1.49481	0.061266	0.481114	-0.967123	0.521386	0.991099	-1.09214	0.369709	0.83596	1.28597	0.13311	0.262845	1.12156	0.281008	0.460278	1.09659	0.331339	0.647596	1.72251	0.0162214	0.0923954	0.839112	0.683194	0.960889	1.77017	0.0172336	0.132831	1.53854	0.0351523	0.105262	1.98134	0.000375799	0.005176
REACTOME GLUCAGON LIKE PEPTIDE 1 GLP1 REGULATES INSULIN SECRETION	1.31249	0.108586	0.586269	0.882598	0.638904	0.993069	0.868671	0.664511	0.994986	0.738112	0.835175	1	-1.46362	0.0298608	0.0854335	-1.12319	0.279888	0.460082	0.778233	0.801551	0.914764	1.41568	0.0977066	0.265124	1.01366	0.424619	0.871386	-0.559188	0.972612	0.999101	1.76039	0.00472384	0.0257187	0.651876	0.9066	1
REACTOME GLYCOLYSIS	-0.890381	0.678629	1	-1.36171	0.0602351	0.481114	0.792963	0.821361	1	0.695435	0.935551	1	1.39018	0.0280619	0.0822543	1.64665	0.00327422	0.015017	1.08331	0.31867	0.636097	1.25353	0.151967	0.338709	0.86604	0.68384	0.960889	0.763923	0.834437	0.96872	0.787213	0.905589	0.968478	-0.689441	0.961844	1
REACTOME GLYCOSPHINGOLIPID METABOLISM	-0.9503	0.523095	1	-1.29558	0.126508	0.590244	1.05427	0.402008	0.978593	1.07691	0.360432	0.835574	-1.62209	0.00872923	0.0343284	-1.74582	0.00147808	0.00799474	1.25557	0.166163	0.470171	1.56331	0.0384803	0.149633	-0.701618	0.894546	0.992947	1.3817	0.0982926	0.37026	1.37252	0.0734967	0.181303	1.37897	0.100914	0.339679
REACTOME GOLGI ASSOCIATED VESICLE BIOGENESIS	1.29406	0.108646	0.586269	0.88809	0.64244	0.993913	0.687192	0.937797	1	1.00242	0.450486	0.876643	-1.76724	0.000656276	0.00454289	-1.81131	0.000483949	0.00351802	0.982592	0.471294	0.748343	-0.800092	0.774156	0.894458	1.1697	0.224368	0.663222	1.36245	0.0988031	0.370717	0.800156	0.853066	0.937935	0.791995	0.769049	0.94362
REACTOME HATS ACETYLATE HISTONES	-0.764692	0.956461	1	-0.801569	0.892393	1	-1.28771	0.0854743	0.884026	-1.12928	0.224329	0.772594	1.81185	0.000283607	0.00278502	1.7999	0.000291121	0.00268997	-1.21605	0.156244	0.458335	-0.615918	0.983371	0.998976	1.2015	0.169082	0.601005	-1.02197	0.408414	0.752221	-1.23763	0.139244	0.281017	-1.45145	0.0278293	0.136245
REACTOME HCMV EARLY EVENTS	-0.632016	0.99936	1	0.543294	0.997562	1	0.820757	0.794158	1	0.891369	0.65078	0.947746	1.38919	0.0220178	0.0691038	1.692	0.000289352	0.00268997	-0.677953	0.957794	0.981093	-0.787395	0.804943	0.914836	1.28611	0.116794	0.535021	0.71311	0.908706	0.998089	-1.00734	0.458807	0.63901	-0.664867	0.976913	1
REACTOME HDMS DEMETHYLATE HISTONES	-0.651738	0.958944	1	-1.04153	0.386443	0.870276	-1.35802	0.0923286	0.906723	-1.3726	0.094897	0.590156	1.86242	0.000727096	0.00481159	1.62852	0.0166259	0.0538131	0.54723	0.97333	0.98792	-0.76131	0.770672	0.89255	1.52407	0.0481592	0.378963	NA	NA	NA	-1.22222	0.213655	0.383228	NA	NA	NA
REACTOME HEPARAN SULFATE HEPARIN HS GAG METABOLISM	-1.2382	0.14693	0.659119	-1.19543	0.181364	0.656886	-0.919653	0.58312	0.991099	-0.887852	0.639502	0.945467	-2.05512	0.000164258	0.00278502	-1.92548	0.000483949	0.00351802	0.964554	0.504182	0.76201	0.955881	0.505879	0.721415	-1.29558	0.125947	0.537922	-0.90629	0.582666	0.854063	1.45847	0.0374807	0.110093	0.696183	0.882208	0.992256
REACTOME HIV INFECTION	0.41719	1	1	-0.767098	0.998681	1	0.655881	0.999845	1	0.651588	0.998927	1	1.35016	0.00584416	0.0251966	1.59901	0.000700525	0.00447034	-1.021	0.391304	0.699023	-1.16555	0.166468	0.360311	-1.00605	0.427942	0.871629	1.15314	0.187006	0.533257	-1.22459	0.0891998	0.205905	0.847556	0.786903	0.955195
REACTOME HS GAG BIOSYNTHESIS	-1.2281	0.202864	0.764061	-1.31252	0.129508	0.597771	1.15124	0.300562	0.963258	0.99856	0.476392	0.876799	-1.74031	0.00118926	0.00705629	-1.76378	0.0020185	0.0100254	-0.923432	0.569678	0.813105	-0.692709	0.848412	0.937277	-0.794978	0.758724	0.978909	-1.01426	0.440687	0.776613	1.07675	0.338978	0.534026	0.634536	0.912457	1
REACTOME HSF1 ACTIVATION	0.582852	0.962134	1	1.04407	0.423722	0.895418	0.655959	0.917406	1	0.98826	0.490622	0.886313	1.38681	0.0677435	0.156312	1.77702	0.00171233	0.00906045	-1.06786	0.374062	0.683358	-0.847345	0.668553	0.832699	-0.853506	0.657826	0.960055	1.21401	0.231751	0.593273	-1.61634	0.0120567	0.0517815	0.569383	0.959613	1
REACTOME HSP90 CHAPERONE CYCLE FOR STEROID HORMONE RECEPTORS SHR IN THE PRESENCE OF LIGAND	0.567407	0.984978	1	0.934171	0.578968	0.976152	0.915746	0.601649	0.991099	1.20482	0.207347	0.762014	-1.56071	0.00978928	0.0370743	-1.5907	0.00712205	0.0279015	0.89349	0.611648	0.836778	0.76748	0.802053	0.914198	1.20063	0.203	0.641615	-0.967825	0.501588	0.799032	0.721046	0.92503	0.972861	0.644689	0.934289	1
REACTOME IKK COMPLEX RECRUITMENT MEDIATED BY RIP1	-1.11133	0.331499	0.883733	-1.20513	0.218848	0.714775	0.626874	0.929905	1	0.507731	0.986268	1	-1.5639	0.0216488	0.0684629	-1.63759	0.0126258	0.0431619	0.83585	0.675918	0.87714	1.1925	0.253286	0.470802	-1.01547	0.439911	0.878743	NA	NA	NA	-0.548412	0.976048	0.992625	NA	NA	NA
REACTOME INFECTION WITH MYCOBACTERIUM TUBERCULOSIS	-1.35064	0.106963	0.582841	-1.5502	0.0294308	0.421464	-0.87347	0.645949	0.994304	-1.03038	0.427077	0.857346	0.651124	0.951628	0.974305	0.861805	0.67804	0.814327	0.956436	0.505234	0.762175	1.70523	0.0187185	0.101625	-1.10021	0.322697	0.795322	1.83029	0.0109718	0.0964362	0.745123	0.867209	0.941441	1.66816	0.0168131	0.0909318
REACTOME INHIBITION OF DNA RECOMBINATION AT TELOMERE	0.848501	0.703603	1	0.360518	0.999724	1	-0.757314	0.83692	1	-1.01144	0.446513	0.875008	1.97258	0.000253036	0.00278502	1.59003	0.0122418	0.0422046	-1.12371	0.306491	0.625729	-1.5311	0.0385604	0.149633	1.10616	0.325961	0.795322	-0.377111	0.999101	0.999101	-1.27133	0.162695	0.31263	0.754318	0.783164	0.952896
REACTOME INSULIN PROCESSING	0.642104	0.911846	1	-0.75193	0.81347	1	1.39482	0.0789377	0.87672	1.26572	0.194537	0.754508	-1.69497	0.00394782	0.0185622	-1.56226	0.0228852	0.0710493	-1.30997	0.135689	0.42769	0.81685	0.690323	0.846819	-1.47784	0.0596386	0.407032	0.808884	0.704881	0.916071	1.12743	0.28019	0.464685	0.870434	0.628866	0.868614
REACTOME INTERACTIONS OF REV WITH HOST CELLULAR PROTEINS	-0.683838	0.937806	1	-0.561052	0.992069	1	-0.427021	1	1	-0.549763	0.987949	1	1.46262	0.0351771	0.0963311	2.12997	0.000251699	0.00268997	-1.06447	0.363551	0.678428	1.09396	0.31746	0.542467	0.896425	0.603417	0.943483	0.902886	0.573808	0.84809	-1.11636	0.307862	0.496819	-0.84761	0.708656	0.909369
REACTOME INTERLEUKIN 1 FAMILY SIGNALING	-1.20082	0.103545	0.582577	-1.07243	0.277145	0.763272	-1.32758	0.0459092	0.809491	-0.955126	0.542917	0.908119	-1.04412	0.365528	0.526529	-0.89486	0.710688	0.838089	1.50336	0.0120872	0.112398	-1.14455	0.231069	0.444785	0.848836	0.785947	0.978909	1.92996	0.000249128	0.00586665	-0.693195	0.969269	0.992625	1.83671	0.000147427	0.00292644
REACTOME INTERLEUKIN 1 SIGNALING	-0.910507	0.669303	1	-0.992077	0.456767	0.912717	-1.22573	0.125094	0.906723	-0.859774	0.755621	0.987545	-1.01436	0.425776	0.582346	-0.905603	0.656174	0.800479	1.47485	0.0232959	0.167486	-1.26256	0.121786	0.297216	-0.934772	0.563981	0.927631	1.78082	0.00392253	0.0436708	-0.850687	0.751566	0.871416	1.6802	0.00306843	0.0247797
REACTOME INTERLEUKIN RECEPTOR SHC SIGNALING	-0.92831	0.553478	1	-1.06633	0.37833	0.860681	-0.775771	0.769265	1	-1.04025	0.424794	0.857346	0.71588	0.895354	0.934348	-0.95273	0.526109	0.702056	1.46037	0.0751013	0.31862	1.91801	0.0023855	0.0269899	0.635746	0.928913	0.99347	1.77462	0.0150833	0.12076	1.32892	0.108535	0.237806	1.68607	0.0139473	0.0795996
REACTOME INTRA GOLGI AND RETROGRADE GOLGI TO ER TRAFFIC	-1.31195	0.0213465	0.218752	-1.2764	0.0341297	0.429079	1.00916	0.4279	0.980017	0.82508	0.8529	1	-1.98302	0.000147254	0.00278502	-2.16462	0.000142633	0.00268997	-1.01162	0.410553	0.710547	-0.810533	0.864507	0.946089	-1.09812	0.256971	0.715749	-0.99004	0.465243	0.779767	-0.778579	0.912269	0.969848	0.916771	0.628815	0.868614
REACTOME INTRA GOLGI TRAFFIC	-1.00809	0.418793	0.92449	-1.07682	0.32933	0.812108	0.63001	0.962073	1	-0.673849	0.938175	1	-1.99053	0.000166917	0.00278502	-2.03472	0.000164231	0.00268997	-1.20863	0.196082	0.510085	-0.779034	0.786194	0.902816	-1.21966	0.193458	0.627466	-0.824982	0.707877	0.918445	-1.16119	0.248529	0.429244	1.06568	0.372855	0.675718
REACTOME KERATINIZATION	1.5081	0.00596044	0.0899705	1.68983	0.000137988	0.0192666	1.43395	0.041346	0.809491	1.68401	0.00270612	0.164622	1.21561	0.0907003	0.194849	-0.627999	0.99802	0.998841	1.24455	0.158683	0.46235	1.53564	0.0557817	0.187674	0.828116	0.764848	0.978909	1.80122	0.0142502	0.116087	1.03538	0.385671	0.578239	0.519547	0.979664	1
REACTOME LAGGING STRAND SYNTHESIS	-0.74056	0.822195	1	-1.04175	0.406913	0.879801	-1.0564	0.412244	0.979948	-1.17664	0.27907	0.818131	2.10081	0.00023359	0.00278502	2.275	0.000239693	0.00268997	0.922884	0.548994	0.796677	-1.09594	0.357831	0.586557	1.10457	0.343079	0.803805	-1.18412	0.260658	0.628428	-0.641354	0.918243	0.971409	-0.877732	0.641569	0.873727
REACTOME LDL CLEARANCE	-1.23271	0.220451	0.775097	-1.45636	0.0759905	0.506257	1.41826	0.068082	0.854467	1.2323	0.238023	0.789413	-0.813862	0.736235	0.828976	-0.925018	0.562241	0.734171	1.52058	0.0562687	0.27501	1.40767	0.106551	0.278115	-0.789564	0.748439	0.978909	1.85823	0.00849732	0.079573	1.81905	0.00846945	0.0395241	1.48616	0.0706626	0.266403
REACTOME M PHASE	-0.943764	0.757576	1	-1.29889	0.00974026	0.262142	-1.06207	0.242348	0.963258	-1.29762	0.0133106	0.345766	1.62558	0.00039984	0.00323507	2.03378	0.000436491	0.00327324	1.00216	0.430574	0.727722	-1.07497	0.288543	0.5087	1.07136	0.270443	0.731729	0.749086	0.993188	0.999101	-1.25372	0.0430808	0.122213	0.619504	0.999874	1
REACTOME MAP2K AND MAPK ACTIVATION	-1.32414	0.104857	0.582577	-1.42536	0.0603802	0.481114	-1.34989	0.0911552	0.906723	-1.38856	0.0761948	0.566548	-1.52631	0.0182978	0.0607975	-1.36908	0.0729939	0.17874	1.01876	0.421234	0.719476	1.62391	0.0272772	0.122433	0.955111	0.514612	0.909065	0.732165	0.844938	0.96872	1.81288	0.00376081	0.0223981	0.922767	0.55774	0.82189
REACTOME MATURATION OF SARS COV 2 SPIKE PROTEIN	-1.06834	0.367027	0.905512	0.614699	0.943787	1	0.980419	0.508686	0.991099	0.896786	0.605889	0.933989	-1.84748	0.00051247	0.00373414	-1.74835	0.00186062	0.00951419	0.850597	0.667666	0.872448	1.32001	0.136419	0.318638	-0.853958	0.666266	0.960055	-0.804218	0.729614	0.921263	1.28029	0.133427	0.272555	1.01718	0.4375	0.730678
REACTOME MEIOSIS	0.509312	0.99841	1	-0.488942	1	1	-1.41926	0.0434475	0.809491	-1.31954	0.0874552	0.572821	2.1319	0.000274348	0.00278502	2.17526	0.000278784	0.00268997	1.38788	0.0675297	0.303006	-1.27456	0.153135	0.340533	1.31196	0.100845	0.526741	-1.45398	0.0584108	0.284987	-1.09188	0.328586	0.520607	-1.10303	0.28385	0.589751
REACTOME MEIOTIC RECOMBINATION	0.563327	0.982412	1	-0.603604	0.992169	1	-0.993174	0.459615	0.991099	-1.05546	0.369635	0.83596	2.00892	0.000255951	0.00278502	2.09849	0.000258065	0.00268997	-0.585203	0.978452	0.989816	-0.751682	0.787408	0.902816	0.812078	0.740755	0.978909	-1.68107	0.0179565	0.134272	-0.923894	0.575543	0.739255	-1.21764	0.199471	0.50051
REACTOME MISCELLANEOUS TRANSPORT AND BINDING EVENTS	0.870673	0.664724	1	1.0303	0.453687	0.910267	0.708882	0.848352	1	0.983731	0.494054	0.886313	-1.40293	0.0686695	0.15778	-1.65441	0.00819113	0.0310548	-0.978183	0.481113	0.758571	-0.843631	0.66838	0.832699	-0.700466	0.860927	0.990877	-1.02687	0.421253	0.757545	-1.59803	0.0156273	0.0621631	0.774437	0.753887	0.931551
REACTOME MITOCHONDRIAL TRNA AMINOACYLATION	1.19093	0.265919	0.837891	1.13357	0.326696	0.812108	0.572474	0.960623	1	0.71266	0.838907	1	1.35765	0.101293	0.213114	1.5637	0.0308023	0.0901882	-1.12482	0.315156	0.633116	-1.46565	0.0654077	0.207788	-1.10101	0.338167	0.798971	-0.876197	0.626084	0.876596	-1.61236	0.012408	0.0530788	-0.739379	0.82823	0.981148
REACTOME MITOTIC G1 PHASE AND G1 S TRANSITION	0.75287	0.904361	1	0.800732	0.838176	1	-0.74712	0.983811	1	-1.12824	0.202078	0.757506	1.5785	0.000896861	0.00547789	2.09803	0.000309789	0.00268997	-1.08413	0.288786	0.608282	-1.22081	0.137216	0.318969	-0.791007	0.893328	0.992947	0.898575	0.643887	0.876596	-1.15778	0.194927	0.355552	-0.788657	0.93527	1
REACTOME MITOTIC G2 G2 M PHASES	0.711636	0.956674	1	-0.747718	0.998865	1	0.822264	0.881258	1	-0.834159	0.901111	1	1.41569	0.00345477	0.0165563	1.87472	0.000335683	0.00268997	-1.09362	0.263858	0.580051	-1.23982	0.102995	0.273342	0.9147	0.658778	0.960055	1.03061	0.377177	0.726792	-1.21272	0.108507	0.237806	-0.780504	0.967144	1
REACTOME MITOTIC PROMETAPHASE	-1.04614	0.275087	0.840591	-1.38717	0.0106762	0.262142	-1.0444	0.331492	0.965007	-1.24977	0.058133	0.566548	1.91013	0.000312793	0.00278502	2.29766	0.000336814	0.00268997	1.05577	0.325388	0.642174	-0.926462	0.614288	0.806618	1.09413	0.263539	0.722835	-0.63497	0.997675	0.999101	-1.24762	0.0839995	0.19728	-0.743888	0.988409	1
REACTOME MITOTIC SPINDLE CHECKPOINT	-1.09623	0.245484	0.808867	-1.43241	0.0171116	0.313338	-1.37897	0.0345349	0.809491	-1.58577	0.00357234	0.173798	1.63361	0.000853	0.00527767	2.09428	0.00029976	0.00268997	1.37624	0.0515864	0.265837	0.692956	0.965348	0.998141	1.00768	0.429529	0.871629	-0.699378	0.947591	0.999101	-1.02004	0.432294	0.615605	-0.713467	0.975007	1
REACTOME MRNA DECAY BY 5 TO 3 EXORIBONUCLEASE	0.710722	0.831085	1	0.422264	0.993692	1	-0.535917	0.963855	1	-0.565587	0.949429	1	1.8886	0.00115075	0.00689342	1.9029	0.00070159	0.00447034	NA	NA	NA	NA	NA	NA	NA	NA	NA	NA	NA	NA	NA	NA	NA	NA	NA	NA
REACTOME MTOR SIGNALLING	1.35304	0.0706162	0.49609	1.39943	0.0592105	0.481114	0.996254	0.479979	0.991099	0.895916	0.625088	0.939205	-1.76967	0.000503271	0.00368868	-1.73195	0.00212975	0.0104093	0.657554	0.933016	0.971749	1.43557	0.0774476	0.233182	-0.756283	0.829817	0.990798	0.774907	0.793278	0.963113	1.30391	0.0997294	0.223319	0.537661	0.984353	1
REACTOME MTORC1 MEDIATED SIGNALLING	1.33479	0.101152	0.576465	1.05505	0.415051	0.88307	0.971879	0.522831	0.991099	0.638511	0.922253	1	-1.7631	0.00224486	0.0114167	-1.71016	0.00545982	0.0226553	-0.617184	0.940678	0.975184	1.40625	0.106791	0.278115	-0.997216	0.459907	0.890763	0.999036	0.442162	0.777274	1.118	0.28797	0.473942	0.771513	0.752943	0.931551
REACTOME N GLYCAN TRIMMING IN THE ER AND CALNEXIN CALRETICULIN CYCLE	-0.751728	0.876443	1	-0.829638	0.731261	1	1.26093	0.15546	0.9489	1.31052	0.131835	0.649385	-1.60001	0.00816882	0.0325187	-1.50046	0.0277036	0.0824335	1.24338	0.184431	0.49695	0.566888	0.974591	0.998976	0.882478	0.629703	0.95368	1.28774	0.152396	0.471299	1.01661	0.4088	0.598293	0.964352	0.498735	0.782709
REACTOME NEDDYLATION	0.580481	1	1	0.672813	0.985546	1	-0.971443	0.522804	0.991099	-0.962538	0.55	0.90978	-0.97415	0.533918	0.679428	-0.928953	0.653158	0.800479	-1.45465	0.00989011	0.100594	-1.59008	0.00104058	0.014275	-1.41823	0.015361	0.209712	-0.900841	0.663656	0.886303	-1.48508	0.00241466	0.0167725	-0.927007	0.680545	0.897833
REACTOME NEGATIVE REGULATION OF THE PI3K AKT NETWORK	0.942961	0.594188	1	0.83036	0.755585	1	-0.825452	0.825746	1	-1.0556	0.344701	0.830108	-1.37969	0.0274691	0.0811056	-1.34056	0.0419979	0.11696	1.34077	0.0627409	0.2915	1.11071	0.276267	0.492827	0.890592	0.677092	0.960889	1.09836	0.282603	0.649899	1.37888	0.032796	0.0998888	1.18311	0.206972	0.511949
REACTOME NETRIN 1 SIGNALING	0.621295	0.951332	1	1.0266	0.451301	0.908295	1.30841	0.11182	0.906723	1.20914	0.207388	0.762014	-1.52791	0.0157103	0.0540746	-1.38418	0.0560687	0.146115	-1.25492	0.145662	0.445849	-0.936056	0.550533	0.766028	-1.42594	0.0663602	0.435155	-0.908229	0.586365	0.854063	1.59695	0.0134867	0.0567917	-1.10328	0.302103	0.611906
REACTOME NON INTEGRIN MEMBRANE ECM INTERACTIONS	-1.24906	0.130029	0.627376	-1.26065	0.110858	0.56665	-1.17434	0.202158	0.963258	-1.08732	0.318063	0.830108	-1.77514	0.000490116	0.00368868	-1.76492	0.000638876	0.00418017	1.19796	0.192547	0.505547	0.87915	0.635393	0.817067	1.35634	0.0825906	0.480325	-0.961342	0.508022	0.80544	0.833932	0.804801	0.906557	1.0759	0.356856	0.661818
REACTOME ORGANELLE BIOGENESIS AND MAINTENANCE	1.25471	0.0440542	0.359187	0.984217	0.537292	0.966433	-0.858659	0.918086	1	-0.736784	0.998754	1	-0.941509	0.634327	0.756488	0.989921	0.483365	0.666201	-1.32541	0.0263871	0.176189	-1.20412	0.107759	0.279142	-1.34902	0.0189681	0.227817	-1.3011	0.0510221	0.266271	-1.34338	0.0145423	0.058495	-1.49374	0.00165769	0.0163085
REACTOME P75 NTR RECEPTOR MEDIATED SIGNALLING	-0.914821	0.652473	1	0.796417	0.809672	1	-0.997838	0.438683	0.980017	-0.863705	0.74285	0.987545	-1.45467	0.0129748	0.0465897	-1.22968	0.116368	0.250275	1.26869	0.109725	0.389557	1.11025	0.275862	0.492827	-0.906369	0.62798	0.95368	1.23145	0.160731	0.484115	1.43409	0.019802	0.0704987	1.25688	0.148413	0.428286
REACTOME P75NTR SIGNALS VIA NF KB	0.524985	0.969403	1	0.916691	0.595608	0.978374	0.603947	0.9289	1	-0.791502	0.737928	0.987429	-1.59643	0.0142405	0.0501153	-1.36436	0.109326	0.240162	1.82251	0.00768246	0.083399	NA	NA	NA	0.965172	0.499802	0.908079	NA	NA	NA	1.08574	0.3415	0.534026	NA	NA	NA
REACTOME PCNA DEPENDENT LONG PATCH BASE EXCISION REPAIR	-0.597659	0.95604	1	-0.829813	0.689356	1	-0.895034	0.611957	0.991099	-0.932718	0.548007	0.908195	2.06522	0.000235018	0.00278502	2.15434	0.000240674	0.00268997	-0.965375	0.500563	0.758571	-0.901334	0.594636	0.793692	0.996912	0.466786	0.892132	-1.00904	0.450145	0.779203	-1.07211	0.381709	0.575465	-0.586438	0.965866	1
REACTOME PCP CE PATHWAY	0.592162	0.991881	1	-0.85028	0.789379	1	1.07977	0.32167	0.965007	1.0204	0.424907	0.857346	-1.08396	0.30762	0.466862	-0.861983	0.748056	0.857235	-0.845895	0.750047	0.899671	-1.08792	0.325398	0.551073	-1.32985	0.0823717	0.480325	1.82754	0.0042735	0.0470555	-0.70831	0.943578	0.982882	1.6095	0.00888184	0.0552707
REACTOME PEPTIDE HORMONE METABOLISM	1.06109	0.408597	0.916864	1.31246	0.112922	0.56665	1.32283	0.0954721	0.906723	1.29334	0.12513	0.649385	-1.58283	0.00299874	0.0145386	-1.27309	0.0925124	0.215273	-0.639582	0.981523	0.990027	0.865272	0.658724	0.826479	-0.761423	0.87886	0.992947	0.890419	0.606089	0.86387	1.52166	0.0194135	0.0704987	1.17151	0.254383	0.557082
REACTOME PKA ACTIVATION IN GLUCAGON SIGNALLING	1.32528	0.125871	0.625758	-0.858013	0.639954	0.993069	0.935094	0.567518	0.991099	0.837377	0.675344	0.960555	-1.78256	0.00140647	0.00789397	-1.50211	0.0462801	0.126568	-1.36966	0.112679	0.39412	NA	NA	NA	-0.756619	0.783958	0.978909	NA	NA	NA	1.66252	0.0246425	0.0821911	NA	NA	NA
REACTOME PKMTS METHYLATE HISTONE LYSINES	0.892786	0.653978	1	0.694315	0.901198	1	-1.36325	0.0705336	0.868603	-1.20115	0.193236	0.754508	1.7081	0.00179166	0.00953477	1.54985	0.0147135	0.048791	0.697682	0.907232	0.962787	0.904416	0.581623	0.785342	1.59604	0.0184591	0.224919	1.01708	0.414371	0.752483	-0.954239	0.535089	0.701505	0.8538	0.66315	0.882776
REACTOME PLASMA LIPOPROTEIN ASSEMBLY REMODELING AND CLEARANCE	1.04202	0.436359	0.935539	-0.928327	0.565956	0.976152	-1.16695	0.22431	0.963258	-1.14531	0.248469	0.797529	-1.10703	0.281306	0.440335	-1.21563	0.155846	0.311949	1.90146	0.000215193	0.00950081	1.63852	0.0124095	0.0833577	0.957009	0.515097	0.909065	1.47999	0.0529817	0.271988	1.20763	0.145406	0.289202	0.913324	0.588936	0.846135
REACTOME PLASMA LIPOPROTEIN CLEARANCE	1.00877	0.491273	0.994115	0.720904	0.844435	1	0.893258	0.616917	0.991099	0.946713	0.544134	0.908119	0.906567	0.619291	0.744351	0.940908	0.547952	0.720927	1.89793	0.00148968	0.032643	1.40367	0.0877107	0.249609	-0.9966	0.451095	0.882846	1.81585	0.0123316	0.105258	1.72008	0.010395	0.046305	1.26996	0.184148	0.475563
REACTOME POLO LIKE KINASE MEDIATED EVENTS	-1.36317	0.115882	0.602049	-1.49413	0.061266	0.481114	-1.40335	0.083571	0.87672	-1.51583	0.0399915	0.513454	2.04	0.000231803	0.00278502	2.11181	0.000233863	0.00268997	-0.605013	0.941497	0.975184	NA	NA	NA	1.26882	0.197024	0.631472	NA	NA	NA	NA	NA	NA	NA	NA	NA
REACTOME POSITIVE EPIGENETIC REGULATION OF RRNA EXPRESSION	-1.04008	0.371019	0.905656	-1.09925	0.276864	0.763272	-0.812254	0.816828	1	-0.782973	0.855884	1	1.54381	0.00563154	0.0247947	1.55523	0.00736698	0.0284052	-0.559018	0.991559	0.996264	-0.689506	0.906883	0.969599	1.26513	0.144398	0.560401	-0.623035	0.957759	0.999101	-1.12534	0.285938	0.472038	0.651754	0.939921	1
REACTOME POSTMITOTIC NUCLEAR PORE COMPLEX NPC REFORMATION	-1.21959	0.209342	0.771711	-0.971612	0.49377	0.933235	-0.621417	0.94765	1	-0.957645	0.518973	0.905771	1.5415	0.0280172	0.0822543	2.05277	0.000241429	0.00268997	-0.937475	0.540169	0.790859	0.91718	0.566538	0.775976	-0.550181	0.974513	0.996841	-1.03573	0.410391	0.752483	-0.958195	0.529604	0.697938	-1.26799	0.164316	0.456287
REACTOME PRC2 METHYLATES HISTONES AND DNA	0.798384	0.760104	1	0.811012	0.736134	1	-0.969148	0.508939	0.991099	-1.05935	0.38205	0.842501	2.04577	0.000249813	0.00278502	2.15138	0.000252334	0.00268997	1.19162	0.24254	0.562739	NA	NA	NA	1.2591	0.193574	0.627466	NA	NA	NA	-1.0319	0.428466	0.612582	NA	NA	NA
REACTOME PROCESSIVE SYNTHESIS ON THE C STRAND OF THE TELOMERE	-1.05314	0.406375	0.916864	-0.997458	0.458545	0.914634	-1.07306	0.394951	0.978593	-1.02803	0.439391	0.870553	2.21847	0.000234522	0.00278502	2.19885	0.000238777	0.00268997	1.00292	0.446513	0.732898	-1.36666	0.12206	0.297216	1.4686	0.070008	0.453747	-0.766533	0.763849	0.947248	-1.12044	0.324741	0.517091	-0.697147	0.868378	0.987923
REACTOME PROGRAMMED CELL DEATH	0.777772	0.891952	1	0.822649	0.819537	1	0.790418	0.938986	1	0.76332	0.950016	1	-1.18682	0.109238	0.224975	-1.14344	0.170749	0.335705	1.12849	0.210205	0.529192	1.10904	0.228555	0.442569	1.17999	0.141533	0.560401	1.90864	0.000251067	0.00586665	0.992883	0.4846	0.663784	1.61517	0.00279525	0.0234755
REACTOME PYRUVATE METABOLISM AND CITRIC ACID TCA CYCLE	1.48012	0.00857106	0.107676	1.19688	0.224801	0.72156	-0.838361	0.748374	1	-0.915109	0.598197	0.933989	0.895657	0.655399	0.771859	-0.808172	0.804246	0.894668	0.823222	0.747973	0.898363	-0.985851	0.47996	0.700871	-2.03194	0.00019988	0.0141838	-1.26916	0.150402	0.46948	-1.81197	0.000519818	0.00960416	-1.07316	0.327027	0.629086
REACTOME RAB GERANYLGERANYLATION	-1.00016	0.438952	0.935705	-1.13844	0.235375	0.730013	0.755251	0.869354	1	0.975203	0.494492	0.886313	-1.48647	0.0170787	0.0578263	-1.56714	0.00763723	0.0293202	-1.02176	0.409304	0.709838	0.834877	0.708757	0.858429	-0.696642	0.93078	0.99347	-1.10776	0.310932	0.672121	1.07573	0.309199	0.498231	-0.712634	0.935135	1
REACTOME RECOGNITION OF DNA DAMAGE BY PCNA CONTAINING REPLICATION COMPLEX	-0.793786	0.777017	1	-1.17155	0.240753	0.736751	-0.876416	0.636816	0.994304	-0.909909	0.580173	0.923402	1.82213	0.00120715	0.00709483	1.98784	0.000246366	0.00268997	-0.617848	0.947566	0.978776	-1.14744	0.301826	0.524025	0.819441	0.708939	0.968742	0.926783	0.538829	0.825709	-1.26413	0.164803	0.314996	-0.853685	0.688958	0.902369
REACTOME REGULATION OF CHOLESTEROL BIOSYNTHESIS BY SREBP SREBF	1.53365	0.00226017	0.048599	1.27259	0.139181	0.616923	-0.840439	0.755394	1	0.594162	0.987266	1	1.57981	0.00614282	0.0261227	1.17299	0.185643	0.353564	1.07137	0.345381	0.658674	1.55568	0.0261767	0.118587	0.863845	0.679113	0.960889	-0.745498	0.845538	0.96872	-0.753231	0.869643	0.942912	-1.20326	0.171308	0.459638
REACTOME REGULATION OF INSULIN SECRETION	1.20123	0.207182	0.768846	0.988198	0.503969	0.944223	1.17838	0.221506	0.963258	1.15316	0.251936	0.801745	-1.46917	0.0170572	0.0578263	-1.11853	0.261719	0.440542	-1.13433	0.242549	0.562739	1.33211	0.114612	0.285503	-0.78496	0.841801	0.990798	-0.987147	0.466655	0.779767	1.95047	0.000451264	0.00960416	0.675134	0.930294	1
REACTOME REGULATION OF TNFR1 SIGNALING	-1.24867	0.15916	0.697185	-1.13332	0.270054	0.763272	0.659265	0.936818	1	0.733375	0.843587	1	-1.65767	0.00425459	0.0196342	-1.90347	0.000333834	0.00268997	1.3215	0.128029	0.422263	1.58206	0.0342969	0.140358	1.27041	0.164045	0.594209	1.60324	0.042394	0.23268	1.47747	0.043968	0.124403	1.34247	0.128358	0.396166
REACTOME REGULATION OF TP53 ACTIVITY	0.693254	0.959433	1	0.776635	0.870852	1	0.828593	0.842392	1	0.679408	0.992152	1	1.76119	0.000304785	0.00278502	2.06709	0.00031211	0.00268997	-0.788854	0.910398	0.963071	-0.912296	0.63782	0.817416	-0.917756	0.631671	0.95368	-1.03294	0.388025	0.734973	-1.01587	0.4346	0.617258	-0.872245	0.774537	0.945741
REACTOME REGULATION OF TP53 EXPRESSION AND DEGRADATION	-0.940919	0.54465	1	-0.859497	0.680439	1	0.924718	0.585261	0.991099	0.798484	0.768705	0.99308	1.48386	0.0297343	0.0853663	1.53354	0.023408	0.0724874	0.563483	0.980321	0.989966	1.07666	0.33651	0.562197	-0.812565	0.747994	0.978909	1.27877	0.153352	0.47244	1.42956	0.0470102	0.130275	0.826447	0.69607	0.905592
REACTOME REPRODUCTION	0.412563	1	1	-0.594488	1	1	-1.46763	0.0215827	0.703022	-1.3461	0.062954	0.566548	2.10555	0.000282805	0.00278502	2.01051	0.000291886	0.00268997	1.31011	0.0959983	0.360136	-1.21234	0.198071	0.404447	1.24883	0.13285	0.545923	-1.40819	0.0735961	0.315296	-1.02763	0.417784	0.603119	-1.07008	0.326454	0.629086
REACTOME RESOLUTION OF ABASIC SITES AP SITES	0.614791	0.95396	1	-0.763198	0.851574	1	-0.811465	0.758792	1	-1.04406	0.382407	0.842501	2.28562	0.0002442	0.00278502	2.38273	0.000254259	0.00268997	-0.987673	0.467055	0.747091	-1.37736	0.0905245	0.253365	-0.811325	0.746227	0.978909	-1.19189	0.226709	0.586982	-1.40632	0.0593407	0.155643	-1.29622	0.12105	0.385118
REACTOME RESOLUTION OF AP SITES VIA THE MULTIPLE NUCLEOTIDE PATCH REPLACEMENT PATHWAY	-0.527921	0.986882	1	-0.624043	0.952135	1	-0.931537	0.564484	0.991099	-0.987664	0.481796	0.880796	2.18236	0.000238834	0.00278502	2.26468	0.000243724	0.00268997	-0.949762	0.524633	0.774263	-0.735584	0.817044	0.920001	0.988727	0.473372	0.896803	-0.80928	0.722392	0.920142	-1.11715	0.321597	0.514801	-0.546946	0.981474	1
REACTOME RESOLUTION OF D LOOP STRUCTURES	-0.988375	0.462118	0.959379	-0.974594	0.487743	0.929709	-1.20513	0.210871	0.963258	-1.35312	0.103102	0.601158	1.85349	0.000728332	0.00481159	2.0294	0.00024975	0.00268997	-0.420074	0.999625	0.999625	-0.72475	0.824753	0.923344	0.92567	0.560501	0.927631	-1.00789	0.446623	0.779203	-1.28577	0.149241	0.294117	-1.19513	0.223055	0.531586
REACTOME RESOLUTION OF D LOOP STRUCTURES THROUGH SYNTHESIS DEPENDENT STRAND ANNEALING SDSA	-0.586533	0.976536	1	-0.689403	0.903674	1	-1.2132	0.220486	0.963258	-1.36434	0.103199	0.601158	1.86882	0.00119703	0.00706873	2.06692	0.000243724	0.00268997	-0.580521	0.968257	0.984946	-0.700351	0.842513	0.934633	0.81756	0.721824	0.976522	-1.02319	0.427408	0.762033	-1.4709	0.0473236	0.130473	-1.21721	0.215761	0.521679
REACTOME RESOLUTION OF SISTER CHROMATID COHESION	-1.22297	0.0905893	0.552941	-1.35017	0.0369565	0.432868	-1.07518	0.287383	0.963258	-1.12495	0.219658	0.772594	1.90373	0.000287356	0.00278502	2.32154	0.000304044	0.00268997	1.07642	0.310921	0.630215	-0.959605	0.528799	0.744292	1.21493	0.148253	0.565227	-0.542821	0.99747	0.999101	-1.26825	0.10224	0.227247	-0.670095	0.99384	1
REACTOME RHOF GTPASE CYCLE	1.08839	0.377406	0.90854	1.43724	0.0415038	0.432868	0.724776	0.881232	1	-1.02132	0.415537	0.856374	-1.40492	0.0489851	0.122561	-1.29142	0.118402	0.252739	1.75682	0.00385852	0.0537811	0.891184	0.59961	0.795668	0.749462	0.85009	0.990877	0.701297	0.886067	0.987877	1.63088	0.014106	0.0573821	0.950184	0.519639	0.792891
REACTOME RHOG GTPASE CYCLE	1.17835	0.229892	0.77815	1.26642	0.136008	0.614237	0.681458	0.961837	1	0.922675	0.578235	0.923402	-1.5328	0.00751639	0.0304072	-1.56639	0.00609375	0.024803	1.39697	0.0576635	0.278214	1.3891	0.067726	0.212791	0.765244	0.874472	0.992947	1.41179	0.0719356	0.312033	1.29032	0.0725135	0.180114	0.917868	0.586061	0.844947
REACTOME RHOJ GTPASE CYCLE	1.17444	0.243124	0.805844	0.953774	0.554181	0.972029	-0.963291	0.50152	0.991099	-1.06948	0.343928	0.830108	-1.60314	0.00591327	0.0252449	-1.56751	0.00838845	0.0314115	0.971198	0.485653	0.758571	0.821774	0.745418	0.876404	-0.722929	0.906024	0.99347	-1.05059	0.375954	0.726792	0.988244	0.463245	0.642061	0.834322	0.701113	0.906445
REACTOME RHOQ GTPASE CYCLE	1.19428	0.212257	0.772304	1.04448	0.419888	0.891664	-1.00036	0.438311	0.980017	-1.00218	0.443385	0.873874	-1.61401	0.00441104	0.020281	-1.70621	0.00127775	0.00723267	1.38728	0.0726066	0.312873	1.1372	0.257959	0.47676	0.773467	0.843913	0.990798	-1.07885	0.33945	0.702745	1.27495	0.0923913	0.210868	-0.759148	0.890353	0.995384
REACTOME RNA POLYMERASE I TRANSCRIPTION	-0.856902	0.759145	1	-1.02254	0.39311	0.874918	-0.909005	0.617515	0.991099	-0.809559	0.810611	1	1.56801	0.00325733	0.0157311	1.41098	0.0308285	0.0901882	-0.862881	0.685303	0.878999	-1.01643	0.433129	0.659169	1.00787	0.436196	0.87604	-1.12061	0.298369	0.665847	-1.30229	0.102771	0.227958	-0.892898	0.653317	0.880528
REACTOME RNA POLYMERASE I TRANSCRIPTION INITIATION	-1.18145	0.193421	0.758075	-1.19262	0.18594	0.659349	-0.511234	0.99907	1	0.475821	0.99913	1	1.52041	0.0153228	0.0531816	1.54578	0.0147135	0.048791	-1.17014	0.232193	0.551886	-1.05301	0.391224	0.623963	0.875829	0.648519	0.960055	-1.14869	0.26828	0.638148	-1.38771	0.0547927	0.146567	-1.13408	0.262225	0.56788
REACTOME RNA POLYMERASE III TRANSCRIPTION INITIATION FROM TYPE 3 PROMOTER	0.582285	0.965854	1	-0.361492	1	1	0.933262	0.564668	0.991099	1.04559	0.41154	0.856374	1.503	0.0337187	0.0933633	1.54103	0.0281174	0.0832575	-1.53603	0.0416667	0.235208	-1.13956	0.305749	0.528013	-1.03052	0.422745	0.869677	0.519049	0.981637	0.999101	-1.49432	0.0373103	0.109892	-1.14124	0.281613	0.589186
REACTOME ROLE OF PHOSPHOLIPIDS IN PHAGOCYTOSIS	-1.11529	0.334784	0.884325	-1.36552	0.116434	0.567827	-1.02768	0.446157	0.990771	-1.2446	0.212929	0.767832	-1.02094	0.424476	0.581206	-0.701744	0.892237	0.942114	1.10136	0.330275	0.647362	1.62985	0.0318945	0.136851	0.887575	0.608289	0.945582	1.71977	0.0231293	0.15554	1.7288	0.0108401	0.0476965	1.80793	0.00206689	0.0190634
REACTOME SARS COV 2 INFECTION	-1.21971	0.139145	0.645533	-1.12985	0.230426	0.726947	0.846274	0.733461	1	-0.816156	0.796424	1	-1.44214	0.0235256	0.0720219	-1.42364	0.0328698	0.0947927	0.841379	0.735218	0.892019	1.28486	0.131236	0.311765	-0.923623	0.573868	0.930568	0.892367	0.609342	0.864011	0.863751	0.764471	0.884227	1.00293	0.451277	0.745229
REACTOME SEMA3A PAK DEPENDENT AXON REPULSION	-0.917185	0.570882	1	0.62561	0.914608	1	-1.15596	0.313007	0.963258	-1.1386	0.32057	0.830108	-1.80379	0.000703235	0.00478815	-1.633	0.0130981	0.0445264	NA	NA	NA	NA	NA	NA	NA	NA	NA	NA	NA	NA	NA	NA	NA	NA	NA	NA
REACTOME SEMA4D IN SEMAPHORIN SIGNALING	1.20097	0.252525	0.82133	1.43735	0.0512301	0.461484	0.878845	0.634892	0.994304	0.88108	0.622345	0.939205	-1.69197	0.00466241	0.021202	-1.58459	0.0188968	0.0603608	-0.840681	0.679661	0.878069	1.50958	0.0629771	0.203786	-0.676176	0.888105	0.992947	-0.837192	0.673237	0.889952	1.54734	0.0349462	0.104936	1.08737	0.358906	0.662054
REACTOME SHC1 EVENTS IN ERBB2 SIGNALING	-1.18335	0.258697	0.832024	-1.04528	0.396968	0.877572	1.01723	0.459499	0.991099	-0.662391	0.899486	1	-1.57033	0.0205217	0.0660588	-1.75186	0.0030785	0.0142998	-1.12874	0.301411	0.624391	NA	NA	NA	-1.1337	0.298387	0.768419	NA	NA	NA	-1.22798	0.206146	0.373488	-0.889215	0.621015	0.868287
REACTOME SIGNAL TRANSDUCTION BY L1	-1.16754	0.269194	0.840454	-0.825918	0.696151	1	-0.940676	0.554161	0.991099	-1.03151	0.423377	0.857346	-1.67555	0.00626414	0.026458	-1.54972	0.0275355	0.082134	1.23741	0.206735	0.526871	-1.04126	0.415424	0.643385	0.963692	0.504849	0.909065	-1.04594	0.408056	0.752221	1.36804	0.0976228	0.219976	0.981201	0.481467	0.769901
REACTOME SIGNALING BY ALK IN CANCER	-1.43034	0.0419247	0.346888	-1.36599	0.071522	0.506257	-0.931396	0.56055	0.991099	-1.32894	0.0925006	0.583747	-1.73271	0.00114886	0.00689342	-1.31029	0.0928537	0.215654	1.96239	0.000429461	0.0137448	1.09447	0.30354	0.526064	1.50844	0.0325479	0.314722	1.5777	0.0371488	0.215163	1.3312	0.0700304	0.175974	1.32319	0.124579	0.388792
REACTOME SIGNALING BY CSF3 G CSF	-1.19034	0.223912	0.775097	-1.54296	0.0314508	0.425881	-0.705541	0.883789	1	-1.06831	0.368234	0.83596	-1.52528	0.0232082	0.0712251	-0.875364	0.654601	0.800479	1.47941	0.0621409	0.290276	1.67945	0.0221681	0.106678	1.02807	0.411835	0.862209	1.70761	0.0247166	0.161869	1.29189	0.127107	0.261991	1.71475	0.00858209	0.0537291
REACTOME SIGNALING BY HIPPO	-0.855577	0.656546	1	0.637617	0.911521	1	-1.05351	0.416501	0.979948	-0.749254	0.804972	1	-1.55359	0.0242965	0.0738375	-0.919676	0.574786	0.748143	1.71022	0.0200341	0.153867	-0.871982	0.632618	0.817067	1.87099	0.00217692	0.0723671	-1.04746	0.40625	0.752221	1.4651	0.0599813	0.156941	-0.961617	0.517573	0.792289
REACTOME SIGNALING BY MET	-1.06897	0.308389	0.871379	-1.09903	0.262006	0.763272	-1.26798	0.111271	0.906723	-1.33761	0.064891	0.566548	-1.47693	0.0134164	0.0477623	-1.59496	0.00388682	0.0172637	1.0147	0.415687	0.715413	1.42482	0.0551813	0.187532	0.989351	0.460622	0.890763	1.19153	0.195709	0.550844	1.01825	0.395325	0.587807	0.906132	0.607373	0.861672
REACTOME SIGNALING BY NTRK2 TRKB	0.573603	0.964575	1	1.24353	0.200145	0.683583	-0.635792	0.933851	1	-0.742937	0.81513	1	-1.49037	0.0347377	0.095548	-1.63078	0.0132879	0.0449049	-0.8335	0.69423	0.879857	-0.533859	0.967642	0.998393	-1.37276	0.109861	0.535021	-0.75436	0.77854	0.953626	0.779514	0.800634	0.905649	-1.44798	0.0578547	0.237158
REACTOME SIGNALING BY PDGF	-1.21031	0.161322	0.703892	-1.24146	0.12466	0.590244	-1.18272	0.196695	0.963258	-1.25355	0.137906	0.663972	-1.84645	0.000328138	0.00278822	-1.50881	0.014947	0.0492966	1.28245	0.124599	0.417607	1.03218	0.394142	0.625236	1.05813	0.354443	0.812759	-1.00901	0.437041	0.772337	0.863937	0.732691	0.863242	-0.790146	0.845597	0.982567
REACTOME SIGNALING BY ROBO RECEPTORS	-0.825504	0.982692	1	-0.922197	0.718204	1	0.69186	0.998912	1	0.663023	0.998603	1	1.42702	0.00190476	0.00997199	1.24016	0.0469484	0.12756	0.876902	0.73558	0.892019	-1.02543	0.404777	0.632919	1.09073	0.276321	0.734924	1.83668	0.000994036	0.0140112	1.24926	0.0337691	0.101684	1.35835	0.0508965	0.217256
REACTOME SIGNALING BY WNT IN CANCER	1.17343	0.275671	0.840591	0.872798	0.650522	0.998234	-1.18091	0.251018	0.963258	-1.53386	0.0319361	0.477279	1.46222	0.0364166	0.0988564	1.51732	0.0261845	0.0793838	-0.827569	0.722024	0.88783	0.810523	0.723888	0.865113	-0.76169	0.81904	0.990798	-0.904741	0.586016	0.854063	1.37859	0.0796586	0.190827	-1.33178	0.107824	0.355853
REACTOME SPHINGOLIPID DE NOVO BIOSYNTHESIS	0.918403	0.612877	1	0.857603	0.680189	1	0.792319	0.788582	1	0.797725	0.771037	0.99308	-1.85205	0.000166694	0.00278502	-1.84045	0.00049334	0.00351802	-0.80385	0.768929	0.907876	0.961596	0.488797	0.70952	0.849222	0.699679	0.963088	1.02403	0.400365	0.745661	1.30954	0.0960732	0.217121	0.873057	0.63145	0.868614
REACTOME STRIATED MUSCLE CONTRACTION	1.39832	0.0449746	0.364034	1.64655	0.000559519	0.0520431	0.917376	0.594099	0.991099	-1.4247	0.0647401	0.566548	-1.22347	0.172279	0.316607	-0.776313	0.826339	0.911745	-0.991632	0.462946	0.747091	NA	NA	NA	1.37472	0.0991456	0.526164	-0.890815	0.610194	0.864011	2.04674	0.000672043	0.00960416	1.28827	0.176062	0.463958
REACTOME SULFUR AMINO ACID METABOLISM	1.60275	0.000429799	0.0193896	1.4372	0.0508672	0.461484	1.21457	0.235433	0.963258	1.52377	0.0319735	0.477279	1.00897	0.434044	0.586571	-0.694652	0.902218	0.943299	1.27409	0.172847	0.479471	-1.6827	0.00597882	0.0554157	0.887409	0.605572	0.944742	-1.35637	0.116825	0.405047	-0.795916	0.750694	0.871416	-0.785682	0.779399	0.94963
REACTOME SUMOYLATION	0.825255	0.821078	1	0.992629	0.505942	0.944223	-0.888098	0.756931	1	-0.998707	0.441226	0.872299	1.69948	0.000308166	0.00278502	2.08305	0.000326371	0.00268997	-1.00748	0.42844	0.726606	-1.235	0.112799	0.283097	1.18326	0.144038	0.560401	-0.84613	0.770205	0.95198	-0.913981	0.65711	0.80956	-1.13558	0.178096	0.468036
REACTOME SUMOYLATION OF DNA DAMAGE RESPONSE AND REPAIR PROTEINS	-0.827903	0.838535	1	-0.721802	0.964267	1	-0.584493	0.9988	1	-0.90859	0.630832	0.940774	1.77379	0.000537779	0.00385099	2.03132	0.000277624	0.00268997	-1.00548	0.438315	0.730518	-0.784392	0.821029	0.921293	1.04512	0.370913	0.826196	-0.824761	0.743594	0.927872	-1.18621	0.192798	0.352792	-1.36788	0.0561504	0.232014
REACTOME SUMOYLATION OF DNA REPLICATION PROTEINS	-1.33011	0.0898405	0.551384	-1.08134	0.326669	0.812108	-1.08811	0.328887	0.965007	-1.24281	0.165426	0.703087	1.77604	0.000749438	0.00483834	2.36419	0.00025641	0.00268997	-0.804217	0.77299	0.90809	-0.659412	0.928547	0.983049	0.790563	0.789757	0.980536	0.82382	0.710369	0.918445	-0.905158	0.622066	0.779443	-1.18108	0.207654	0.511949
REACTOME SUMOYLATION OF SUMOYLATION PROTEINS	-0.540239	0.992918	1	-0.594723	0.980817	1	0.412262	0.999282	1	-0.462638	0.997986	1	1.56174	0.0172498	0.0580897	2.09813	0.000249377	0.00268997	-1.21043	0.209127	0.529192	0.768076	0.800098	0.913594	0.757884	0.805937	0.988911	0.906312	0.567402	0.84809	-1.00763	0.454295	0.634365	-1.02979	0.406001	0.699249
REACTOME SUMOYLATION OF UBIQUITINYLATION PROTEINS	-0.898156	0.619892	1	-0.831984	0.732762	1	0.920283	0.587971	0.991099	0.675412	0.917355	1	1.4651	0.0351648	0.0963311	2.05307	0.000251762	0.00268997	-1.27503	0.143901	0.44369	0.809449	0.743101	0.876404	-0.769568	0.809992	0.990569	0.814236	0.725034	0.920142	-0.836224	0.725044	0.858899	-1.13009	0.270746	0.580251
REACTOME SYNDECAN INTERACTIONS	-1.14789	0.267689	0.839912	-1.10845	0.313732	0.801919	-0.814538	0.727882	1	-1.10702	0.326864	0.830108	-1.97257	0.000171644	0.00278502	-2.04475	0.00016909	0.00268997	1.24446	0.188316	0.502112	0.962853	0.5	0.717812	0.790482	0.760311	0.978909	-0.750283	0.793944	0.963113	1.18554	0.211612	0.380832	1.35802	0.122698	0.38679
REACTOME TCF DEPENDENT SIGNALING IN RESPONSE TO WNT	0.958812	0.58562	1	0.945787	0.599136	0.978414	-1.11512	0.207435	0.963258	-1.22095	0.0886535	0.572821	1.36702	0.00691389	0.0281526	1.41624	0.00403633	0.0177336	-0.822143	0.869477	0.947003	-1.24564	0.112854	0.283097	0.81174	0.893188	0.992947	-0.813351	0.827979	0.967758	-0.833	0.823277	0.920635	-0.776098	0.960117	1
REACTOME TCR SIGNALING	-1.03469	0.364088	0.905512	-1.35217	0.0454545	0.437696	-0.72812	0.965174	1	-0.823378	0.838638	1	-0.862318	0.764688	0.848442	-0.868201	0.743663	0.85381	0.84844	0.765702	0.905697	-0.91692	0.605404	0.802263	-0.919975	0.602275	0.943483	1.95781	0.000492247	0.00808469	-0.63075	0.992194	0.995889	2.11102	0.000151469	0.00292644
REACTOME TELOMERE C STRAND LAGGING STRAND SYNTHESIS	-0.860701	0.679985	1	-1.1466	0.260274	0.763272	-1.15989	0.263194	0.963258	-1.31275	0.128989	0.649385	2.33387	0.000242954	0.00278502	2.48883	0.000249377	0.00268997	0.888651	0.612669	0.836778	-1.51785	0.0341967	0.140358	0.99559	0.457735	0.889738	-0.914581	0.577695	0.85125	-1.14713	0.278314	0.462998	-1.09551	0.323483	0.62861
REACTOME TELOMERE MAINTENANCE	0.437835	1	1	-0.715709	0.969156	1	-1.08409	0.297656	0.963258	-1.13365	0.235294	0.784548	2.43595	0.000274424	0.00278502	2.47755	0.000289268	0.00268997	-0.717942	0.923436	0.969198	-1.50666	0.0211026	0.106678	1.12199	0.272087	0.731729	-0.99116	0.454467	0.779203	-1.36851	0.0550517	0.146895	-0.984007	0.480608	0.769901
REACTOME TERMINATION OF TRANSLESION DNA SYNTHESIS	-1.12542	0.287023	0.85929	-1.22507	0.189378	0.661695	-1.33098	0.1136	0.906723	-1.40349	0.0772158	0.566548	1.85405	0.00121951	0.00713386	1.98593	0.000246975	0.00268997	0.841827	0.674642	0.87714	0.748063	0.81117	0.918697	-0.919382	0.561559	0.927631	1.28238	0.157166	0.478662	-1.06156	0.382754	0.575465	0.69695	0.868206	0.987923
REACTOME TIGHT JUNCTION INTERACTIONS	0.67552	0.87105	1	0.751584	0.790634	1	-1.15543	0.308947	0.963258	0.88001	0.62467	0.939205	1.81138	0.00169	0.00911578	1.88189	0.000246366	0.00268997	1.24034	0.20162	0.516368	NA	NA	NA	1.24389	0.194306	0.628055	NA	NA	NA	NA	NA	NA	0.599475	0.9318	1
REACTOME TNF SIGNALING	-0.906747	0.607893	1	-0.991466	0.45062	0.908295	-0.713125	0.909844	1	-0.619829	0.976268	1	-1.57708	0.0101819	0.0382129	-1.62369	0.00654986	0.0263946	1.07535	0.349063	0.660933	1.56463	0.0357055	0.142529	1.33558	0.1064	0.535021	1.39533	0.0962506	0.363936	1.26578	0.120539	0.253548	1.32851	0.141882	0.418755
REACTOME TNFR1 INDUCED NFKAPPAB SIGNALING PATHWAY	-0.820823	0.732709	1	-0.907234	0.594178	0.978374	-0.67583	0.915649	1	0.693648	0.880575	1	-1.22025	0.184983	0.332116	-1.56811	0.0192828	0.061272	1.27602	0.170236	0.475733	1.70151	0.0181335	0.0997853	0.715374	0.862358	0.990877	1.50142	0.0678874	0.306505	1.32047	0.110955	0.242125	1.43294	0.0940253	0.323277
REACTOME TP53 REGULATES TRANSCRIPTION OF CELL CYCLE GENES	0.741883	0.84719	1	-0.915146	0.586106	0.978374	0.953147	0.542186	0.991099	-0.82443	0.748708	0.987545	1.48636	0.0202429	0.065684	1.60912	0.0103252	0.0368499	0.732535	0.879469	0.948218	0.844529	0.689501	0.846819	0.912043	0.585917	0.939729	-0.716729	0.87103	0.984817	-0.628989	0.969071	0.992625	-0.675669	0.956204	1
REACTOME TP53 REGULATES TRANSCRIPTION OF DNA REPAIR GENES	-0.80709	0.84205	1	-0.654256	0.986571	1	0.684001	0.954467	1	0.691961	0.939924	1	1.99327	0.000257533	0.00278502	1.94113	0.000265463	0.00268997	-1.00021	0.443109	0.730518	-0.883779	0.652181	0.823897	0.955146	0.514429	0.909065	-0.886122	0.622125	0.87429	-1.04032	0.405055	0.596404	-0.862823	0.720288	0.91372
REACTOME TRANS GOLGI NETWORK VESICLE BUDDING	1.24513	0.147639	0.659653	0.824419	0.743362	1	0.779061	0.846848	1	1.06511	0.361288	0.835574	-1.77621	0.000481928	0.00368868	-1.83257	0.000631014	0.00417361	1.04241	0.372553	0.683358	0.709689	0.923735	0.980129	1.04001	0.37994	0.837228	1.40001	0.0789972	0.324406	1.0073	0.430128	0.614143	1.00011	0.455832	0.746235
REACTOME TRANSCRIPTIONAL REGULATION BY E2F6	-1.19876	0.201527	0.764061	-1.17975	0.215245	0.709229	-0.764747	0.824009	1	-0.940017	0.547432	0.908195	1.69895	0.0058309	0.0251966	1.68402	0.00598355	0.0244362	-1.37866	0.0869157	0.343104	-1.08883	0.358318	0.586557	1.51997	0.0410522	0.349557	-1.43025	0.0744965	0.317641	-0.956849	0.534478	0.701505	-1.34025	0.103441	0.344691
REACTOME TRANSCRIPTIONAL REGULATION BY SMALL RNAS	0.581572	0.98801	1	0.302442	1	1	-0.619651	0.989825	1	-0.804932	0.812352	1	1.65381	0.00214018	0.0110193	1.86947	0.000545703	0.00375209	-1.03805	0.393172	0.700144	0.720083	0.882803	0.951658	1.0822	0.331736	0.798971	-0.694393	0.888772	0.987877	-1.27486	0.131117	0.269227	-0.763616	0.876309	0.989128
REACTOME TRANSCRIPTIONAL REGULATION BY THE AP 2 TFAP2 FAMILY OF TRANSCRIPTION FACTORS	1.19196	0.250788	0.82133	1.42151	0.0537138	0.467187	0.970058	0.525009	0.991099	0.723406	0.853377	1	1.53462	0.0198933	0.0648874	1.94774	0.000503398	0.00352978	1.69111	0.0126528	0.113373	-0.827354	0.691688	0.847427	1.21241	0.209636	0.646031	-0.612242	0.929869	0.999101	-0.778127	0.78238	0.8931	0.8889	0.603787	0.859108
REACTOME TRANSCRIPTIONAL REGULATION BY TP53	1.07465	0.311237	0.871379	0.89174	0.752692	1	1.26145	0.0379244	0.809491	1.10391	0.226337	0.772594	1.67328	0.00038506	0.00315648	1.81245	0.000414938	0.00317597	-0.982994	0.492907	0.758571	-1.00557	0.445179	0.669142	1.01101	0.410092	0.862209	-1.03813	0.364951	0.717856	-1.1057	0.229053	0.402805	-0.755524	0.998178	1
REACTOME TRANSCRIPTIONAL REGULATION BY VENTX	-0.866252	0.681045	1	0.844714	0.692088	1	-1.13287	0.279302	0.963258	-1.19846	0.212902	0.767832	-1.16744	0.224649	0.379311	-0.893667	0.634536	0.79122	1.82837	0.00235798	0.0415963	1.21483	0.201656	0.409194	1.85148	0.00259067	0.0743732	-1.10651	0.321435	0.685272	1.22895	0.159614	0.308358	1.07527	0.360834	0.663241
REACTOME TRANSCRIPTIONAL REGULATION OF PLURIPOTENT STEM CELLS	-0.957345	0.522139	1	-0.889964	0.591376	0.978374	-0.720669	0.820811	1	-0.676132	0.865848	1	1.96167	0.000242954	0.00278502	2.28282	0.000246488	0.00268997	1.69906	0.0204604	0.155032	NA	NA	NA	1.69301	0.0147322	0.208095	NA	NA	NA	NA	NA	NA	NA	NA	NA
REACTOME TRANSFERRIN ENDOCYTOSIS AND RECYCLING	1.05811	0.428913	0.933246	0.949942	0.546913	0.967195	1.2684	0.170078	0.960629	1.40316	0.0812799	0.566548	-1.37446	0.0762827	0.172189	-1.6166	0.00958789	0.0350404	0.773881	0.790907	0.910456	0.90043	0.582014	0.785342	-0.802998	0.758301	0.978909	1.08325	0.34223	0.705681	1.61869	0.0209956	0.0734846	0.80646	0.712873	0.911384
REACTOME TRANSLATION OF SARS COV 2 STRUCTURAL PROTEINS	-1.03922	0.37	0.905656	-0.780013	0.847136	1	0.719903	0.90044	1	-0.986168	0.472672	0.876799	-1.59996	0.00713338	0.0289518	-1.60871	0.0066906	0.026644	0.913652	0.587883	0.817389	1.55992	0.0330107	0.138439	-0.97743	0.474935	0.897187	0.985593	0.453139	0.779203	1.11192	0.250426	0.431245	1.18015	0.247703	0.557082
REACTOME TRANSLESION SYNTHESIS BY POLK	0.804918	0.735959	1	-0.607918	0.93702	1	0.991755	0.495791	0.991099	0.746466	0.789702	0.998978	1.79751	0.0028057	0.0139836	1.8458	0.0025725	0.0123257	NA	NA	NA	NA	NA	NA	NA	NA	NA	NA	NA	NA	-0.72305	0.839407	0.932867	NA	NA	NA
REACTOME TRANSLESION SYNTHESIS BY Y FAMILY DNA POLYMERASES BYPASSES LESIONS ON DNA TEMPLATE	-0.858515	0.691614	1	-0.967947	0.487631	0.929709	-1.11997	0.297791	0.963258	-1.3515	0.0968551	0.590156	1.7194	0.00220049	0.0112832	1.95441	0.000504668	0.00352978	0.752522	0.814759	0.91898	-0.637272	0.932984	0.983838	-0.918963	0.566178	0.927631	1.22921	0.185363	0.532187	-0.837839	0.723138	0.858527	-0.748095	0.864124	0.987923
REACTOME TRIGLYCERIDE METABOLISM	1.61452	0.000433965	0.0193896	1.62876	0.00264395	0.128404	-0.844822	0.679374	1	-1.06886	0.379579	0.84125	1.02598	0.404033	0.561858	-0.922392	0.578868	0.749155	1.41114	0.0832444	0.339377	-0.700974	0.862121	0.945557	1.07207	0.354858	0.812759	-1.23648	0.203268	0.559642	-0.889325	0.62383	0.780149	-1.5998	0.017978	0.0957282
REACTOME TRNA MODIFICATION IN THE NUCLEUS AND CYTOSOL	0.995616	0.508199	1	0.923264	0.595059	0.978374	0.924637	0.586818	0.991099	0.783847	0.800988	1	-0.557535	0.994813	0.999627	0.821094	0.779974	0.878202	-0.978084	0.483081	0.758571	-1.59418	0.0153976	0.0915466	-0.800471	0.763484	0.978909	-0.999228	0.458888	0.779203	-1.69359	0.00271039	0.0183084	-1.37491	0.0735328	0.276216
REACTOME UNFOLDED PROTEIN RESPONSE UPR	-0.843054	0.828591	1	-1.15312	0.182424	0.656886	-0.80693	0.861166	1	0.635878	0.987883	1	-1.87948	0.000157257	0.00278502	-1.63337	0.00213871	0.0104112	1.25472	0.123093	0.416085	0.604989	0.995359	0.998976	0.902091	0.634445	0.955016	1.06101	0.333333	0.697286	1.05169	0.32187	0.514801	1.14739	0.25195	0.557082
REACTOME VIRAL MESSENGER RNA SYNTHESIS	0.277376	1	1	-0.364665	1	1	0.602836	0.977675	1	-0.502344	0.997693	1	1.48378	0.0253416	0.0766399	1.95109	0.000256937	0.00268997	-1.33258	0.104694	0.377636	1.07691	0.336368	0.562197	0.663415	0.927164	0.99347	0.87628	0.618687	0.871096	-1.3075	0.116065	0.249492	-0.759845	0.856334	0.987923
REACTOME VXPX CARGO TARGETING TO CILIUM	-0.55841	0.971091	1	0.564648	0.95898	1	0.9569	0.542941	0.991099	0.840831	0.673754	0.960555	-1.68474	0.00591613	0.0252449	-1.71537	0.00495981	0.0209586	NA	NA	NA	NA	NA	NA	-1.0866	0.358323	0.813519	NA	NA	NA	-0.87875	0.638074	0.791535	-0.726541	0.83614	0.982567
REACTOME ZBP1 DAI MEDIATED INDUCTION OF TYPE I IFNS	-1.15127	0.290323	0.859523	-0.792099	0.75495	1	0.715946	0.84019	1	-1.00728	0.456708	0.876799	-1.7056	0.0046981	0.0212867	-1.78408	0.00205233	0.0101121	1.42211	0.092711	0.353617	1.69669	0.0200382	0.10437	-0.852772	0.656452	0.960055	1.62858	0.0339893	0.201522	1.49843	0.0488114	0.13389	1.56814	0.04053	0.182033
REACTOME GRB2 EVENTS IN ERBB2 SIGNALING	NA	NA	NA	NA	NA	NA	NA	NA	NA	NA	NA	NA	-1.55814	0.0221519	0.0693499	-1.83689	0.00139714	0.00769373	-1.56869	0.0365991	0.217476	NA	NA	NA	NA	NA	NA	NA	NA	NA	NA	NA	NA	NA	NA	NA
REACTOME SIGNALING BY NODAL	NA	NA	NA	NA	NA	NA	NA	NA	NA	NA	NA	NA	1.52503	0.0331375	0.0925554	1.6187	0.0182912	0.0587346	-0.770645	0.769564	0.907876	NA	NA	NA	0.972356	0.495028	0.904645	NA	NA	NA	NA	NA	NA	NA	NA	NA
REACTOME ADAPTIVE IMMUNE SYSTEM	NA	NA	NA	NA	NA	NA	NA	NA	NA	NA	NA	NA	NA	NA	NA	NA	NA	NA	NA	NA	NA	1.59917	0.000415455	0.00827886	NA	NA	NA	1.84351	0.000297265	0.00595719	NA	NA	NA	NA	NA	NA
REACTOME INFECTIOUS DISEASE	NA	NA	NA	NA	NA	NA	NA	NA	NA	NA	NA	NA	NA	NA	NA	NA	NA	NA	NA	NA	NA	1.50165	0.000834028	0.0117731	NA	NA	NA	1.90605	0.000297265	0.00595719	NA	NA	NA	NA	NA	NA
REACTOME SIGNALING BY RHO GTPASES MIRO GTPASES AND RHOBTB3	NA	NA	NA	NA	NA	NA	NA	NA	NA	NA	NA	NA	NA	NA	NA	NA	NA	NA	NA	NA	NA	1.66626	0.000416493	0.00827886	NA	NA	NA	1.53137	0.000594884	0.00946149	NA	NA	NA	NA	NA	NA
REACTOME THE NLRP3 INFLAMMASOME	NA	NA	NA	NA	NA	NA	NA	NA	NA	NA	NA	NA	-0.921565	0.566104	0.704661	-1.08448	0.365002	0.55181	NA	NA	NA	NA	NA	NA	NA	NA	NA	2.02468	0.000675371	0.0102557	NA	NA	NA	1.82975	0.00217091	0.0195004
REACTOME PROCESSIVE SYNTHESIS ON THE LAGGING STRAND	NA	NA	NA	NA	NA	NA	NA	NA	NA	NA	NA	NA	1.96897	0.00023015	0.00278502	2.07923	0.000233863	0.00268997	NA	NA	NA	NA	NA	NA	NA	NA	NA	NA	NA	NA	NA	NA	NA	NA	NA	NA
