# Supplementary material for: Multi-omics characterization of partial chemical reprogramming reveals evidence of cell rejuvenation
Source: eLife. 2024 Mar 22;12:RP90579. doi: 10.7554/eLife.90579 (PMC10959535; doi:10.7554/eLife.90579)
Supplement: Figure 5—source data 2. [file elife-90579-fig5-data2.xlsx]

## Sheet: Sheet1
treatment	normalized fluorescence intensity	sd	% increase fluorescence intensity	sd
control	0.53802	0.0900947	100	16.7456
7c	2.23136	0.292603	414.736	54.3851
7c control kd	2.10386	0.293089	391.037	54.4755
7c prkaca kd	2.43508	0.633865	452.601	117.814
