# Supplementary material for: Multi-omics characterization of partial chemical reprogramming reveals evidence of cell rejuvenation
Source: eLife. 2024 Mar 22;12:RP90579. doi: 10.7554/eLife.90579 (PMC10959535; doi:10.7554/eLife.90579)
Supplement: Figure 6—source data 1. [file elife-90579-fig6-data1.xlsx]

## Sheet: metabolomics_normalized_JP3
	20-2 control	4-3 2c	4-1 7c	4-3 control	20-3 7c	4-2 control	4-2 2c	4-1 2c	20-3 control	20-3 2c	4-2 7c	20-2 7c	4-1 control	4-3 7c	20-2 2c	20-1 control	20-1 2c	20-1 7c
	20-control	4-2c	4-7c	4-control	20-7c	4-control	4-2c	4-2c	20-control	20-2c	4-7c	20-7c	4-control	4-7c	20-2c	20-control	20-2c	20-7c
Cotinine	0.18967	2.35159	2.57658	0.515086	2.52188	1.30877	2.9962	1.81262	1.60159	1.75178	2.55172	18.9001	0.945278	6.00855	0.918749	3.26217	2.39065	4.2329
Hippuric acid	2.26627	0.871316	1.31183	0.855162	9.16207	1.19905	0.853825	1.98362	1.21891	0.767119	4.04788	1.02113	0.868228	1.17942	1.5117	1.5082	1.48832	0.666039
Tyramine	8.53126	11.2429	14.7935	9.27354	12.1149	9.05166	11.9926	11.3755	9.67865	8.31618	13.8142	15.5126	7.65431	16.2422	9.85864	10.0701	11.6214	16.7524
Atenolol	127.181	151.607	207.011	129.191	189.748	132.378	164.403	168.26	116.236	135.148	216.785	194.317	126.412	242.295	144.237	140.897	178.889	223.437
Venlafaxine	2.25062	3.78854	29.4187	7.60299	9.32113	1.02076	11.8729	277.93	51.1765	39.3921	1285.25	3.39969	12.8411	2804.7	10.0454	8.84336	2.41399	4.72651
Lactose	0	0	0	2.71862	9.36451	3.10147	0	0.176263	0	0	179.758	6.38054	0	0	0	0	5.46843	0
S-Adenosylhomocysteine	1.11651	2.22884	16.6065	1.52139	12.5631	1.78094	0.596116	2.35719	1.06832	0.870165	15.3832	21.2542	2.69489	21.2223	1.08165	1.59433	1.79169	13.1991
S-Adenosylmethionine	3.52552	5.18698	4.28869	6.87511	3.80018	7.40003	2.41049	7.67929	4.08725	3.96345	3.48682	4.63789	6.40083	2.94495	3.33834	3.69699	5.9533	3.61757
Aminoisobutyric acid	1099.24	832.853	906.32	1696.63	576.638	1563.79	611.771	973.472	1091.52	1308.56	799.367	1004.09	1431.34	618.108	1328.99	1274.54	1647.94	987.306
Aminododecanoic acid	7.82537	0.926676	1.67175	0.11137	0.749045	0.871859	1.56188	1.09704	1.12678	0.704147	1.62296	0.941641	0.498009	1.3664	0.234574	0.663777	0.77787	1.67017
Myristoleic acid	19.1919	28.7029	26.8321	16.7373	22.6651	21.34	18.1178	22.7432	15.6864	19.5081	18.0522	28.3868	12.9219	41.071	19.1417	20.4742	21.1503	21.2997
Pantothenol	66.9752	60.9319	70.2202	192.332	318.833	21.5751	209.388	85.072	37.547	180.985	215.92	1913.04	29.3544	141.821	66.58	55.793	19.2108	129.827
Lauroyl diethanolamide	18.3022	4.25549	10.0843	9.17609	20.0681	48.8182	6.53645	15.3796	4.83135	15.3252	15.4942	12.8589	4.37121	21.6574	6.13803	7.39607	11.821	63.7707
Palmitoleoyl-EA	6.50941	11.9216	29.5768	7.86948	14.7495	7.33537	10.7405	10.7047	10.2225	21.9679	22.7594	10.1012	14.8031	20.9634	8.4425	25.7592	14.4995	25.0965
Palmitoyl-EA	20.4023	29.9304	36.5464	24.219	39.7023	31.0166	45.8697	32.4219	28.4672	31.7114	34.098	49.0662	23.7316	61.1319	25.8488	30.9055	40.6619	52.9146
Linoleoyl-EA	36.4871	233.705	69.0698	24.573	684.399	195.065	95.061	11.315	108.666	61.6443	185.391	23.4371	426.676	51.3298	7.56937	43.2778	32.139	36.2264
Oleoyl-EA	13.2417	97.1927	80.7384	13.5374	185.24	57.8033	48.9179	16.8476	45.5019	54.1506	94.5468	24.5102	145.31	26.8317	7.47163	68.8522	20.8002	34.7726
Arachidonoyl-EA	28.0908	115.127	50.6873	15.8841	338.062	129.562	52.1016	16.1057	134.319	44.3441	222.694	93.357	235.874	41.4522	5.76662	43.5467	29.6887	36.4969
Eicosanoyl-EA	5.65883	26.5174	26.1963	3.0587	44.694	17.5371	13.5649	4.01985	17.9134	21.2446	36.8304	6.69238	49.1582	9.04699	0.562544	24.7215	5.92737	9.88916
Stearamide	675.956	836.158	1029.97	727.827	912.276	836.709	987.215	1134.93	712.834	967.641	1146.54	861.672	617.357	1349.04	690.172	806.21	885.05	876.257
Putrescine	3.76799	4.06775	1.64484	2.50582	1.2378	2.82326	2.54586	4.22242	2.62562	5.64272	2.13013	1.66927	2.77758	1.95251	7.98421	3.11723	10.0475	2.32945
Tetradecylamine	1164.65	2260.81	2187.48	514.776	1683.82	672.678	1691.01	1200.63	976.438	1461.12	1784.4	2102.44	382.887	2288.5	366.255	1964.88	1153.77	1936.51
3-Dehydroxycarnitine	30.4548	30.8306	15.9943	47.1891	11.8575	46.0498	19.638	37.2757	36.9854	25.3684	22.826	18.0746	49.3649	20.3126	32.0324	30.1619	33.4484	15.4913
CAR 2:0	334.479	199.462	184.451	621.852	197.748	744.419	150.013	253.916	315.825	194.074	278.689	331.482	696.535	254.254	393.353	336.474	485.915	252.55
CAR 3:0	9.55391	10.9396	10.8445	17.5288	6.09648	16.1715	9.59252	18.0604	12.958	10.1138	15.7699	13.5315	20.1741	10.9132	13.1861	9.89574	14.2921	11.8163
CAR 4:0	31.5127	51.9998	14.8204	41.1114	10.4577	37.1275	30.644	75.9194	28.4247	34.5795	16.3564	13.5896	41.3968	12.143	47.3275	27.259	50.8623	10.1799
CAR 5:0	5.22278	4.20976	5.54334	6.97653	4.79794	7.5842	4.43833	5.44048	5.76679	4.78972	11.5192	7.70128	8.46804	5.68134	6.39649	6.95285	7.815	5.5785
CAR 4:0;OH	0.488841	0.883351	1.82311	1.57509	2.90363	2.43337	0.59091	0.23151	0.836229	0.44844	3.77845	4.34745	1.99768	5.96181	0.768882	0.754101	1.4961	3.37753
CAR 6:0	1.10674	1.19385	0.871193	2.42429	0.991979	2.37067	0.760113	0.802392	1.38545	1.49417	0.706874	1.46138	2.36977	0.755115	1.15767	1.09229	1.73206	0.933131
LPC 14:0	17.5826	12.8555	11.0497	29.4454	6.06756	21.3125	8.55127	12.4252	20.6506	8.82187	8.02286	4.97725	28.1403	7.846	9.97592	15.1009	10.8124	4.28699
LPC 15:0	8.39634	5.55765	4.58806	14.492	2.99907	12.2628	3.80056	4.56706	10.3731	3.35853	3.4266	2.57117	15.7935	4.84712	5.02163	8.76354	5.63437	1.14613
LPC 16:1	9.50112	7.46155	6.82491	15.3571	3.20441	14.8882	4.4175	6.00347	10.956	3.57035	2.89089	0.972214	14.4836	5.32895	4.99991	5.16318	4.33792	0.7438
LPC 16:0	464.8	408.635	277.8	664.272	229.572	605.983	330.706	461.531	563.831	289.549	244.052	221.145	725.34	288.799	322.566	502.853	368.521	179.053
LPC 17:0	7.70414	6.1642	4.96143	11.5984	4.79794	9.70605	4.71686	5.85878	10.0029	4.85842	4.75159	3.78491	12.0838	5.59504	4.40478	9.7487	5.93774	3.5601
LPC 18:3	25.8949	14.3839	6.0748	28.3874	4.77191	26.3537	8.96517	16.4635	24.6262	9.53556	9.38906	3.48835	34.3345	4.5163	12.6931	19.3756	12.0155	1.22389
LPC 18:1	22.3048	18.767	28.7729	37.5058	15.0359	35.2603	13.4139	13.5538	30.269	12.1041	14.4006	9.95144	39.0533	26.4254	12.6062	21.1652	16.7061	8.71598
LPC 18:0	167.438	159.265	125.179	228.629	114.474	216.648	128.496	184.284	190.074	111.883	102.17	97.7167	241.533	125.439	134.522	191.254	141.806	84.1238
LPC 20:3	98.0127	37.0694	3.66305	103.602	2.59129	83.9434	12.1878	57.8038	89.5952	33.4689	2.28862	2.8983	83.6017	1.34842	44.0869	56.421	33.5755	1.0447
LPC O-16:0	9.19999	2.68375	1.78275	10.779	0.922569	10.3839	1.81438	2.88598	10.9224	2.07046	0.995329	0.929412	11.6591	0.701178	2.17416	9.7571	2.19359	0.354995
PC 32:0	6.78121	6.88628	2.13257	18.4815	16.4385	27.0492	4.79756	9.13674	20.7799	5.04543	1.34718	5.20043	2.0409	2.9018	5.17801	3.87553	5.37768	0.317805
PC 34:1	3.00931	6.53246	1.11338	14.5954	12.7106	30.2251	6.44274	11.1914	20.2591	3.32227	3.10961	3.74516	1.66504	2.57458	1.21414	0.691084	5.06912	0
LPE 16:0	12.8859	16.5839	1.22102	16.9799	0.79821	20.0802	11.8937	26.7815	15.7732	6.63883	3.95596	0.562539	19.21	1.01761	7.80394	14.9812	8.19357	0.169045
LPE 18:0	21.9763	16.4034	5.65771	28.6996	5.43709	31.9845	13.7966	20.486	23.6288	10.5775	5.18269	5.26157	29.9163	6.01215	10.7144	21.7723	14.0483	3.77986
7-Methylguanine	2.78248	0.625807	0.272458	1.20916	0.939922	1.5478	0	1.1023	2.00376	0.169835	0.59276	0	1.62182	0	1.00346	2.33372	0.503023	0
3',5' cyclic AMP	1.26317	0.243102	0	2.57941	0.0809779	2.40202	0.0806969	0.128909	1.93821	0.270972	0.0919253	0	2.21567	0.104278	0.27367	1.43468	0.246326	0
Adenosine	19102.7	9451.3	2192.29	15870.4	1356.47	18793.5	7683.01	8615.89	14647.6	7483.2	1115.12	607.946	17543.6	849.209	9189.84	18854.3	12705.4	959.241
1-Methyladenosine	6.43315	7.06199	9.5764	6.01398	12.0946	7.19039	3.65219	12.0517	4.96954	3.29174	13.1612	12.6418	7.12999	13.7647	4.21148	5.49717	5.39583	9.22988
5'-Methylthioadenosine	20.0777	112.855	130.743	91.1026	196.727	149.983	94.9959	211.408	58.7681	86.2551	124.216	143.194	110.588	84.2133	111.77	122.316	188.027	164.955
Ectoine	0.920977	0.753375	1.66166	0.849196	1.76416	0.695528	1.04646	0.710314	1.19942	0.54767	3.51218	2.42136	0.60137	1.16144	1.00997	0.67428	1.242	173.948
Deoxycytidine	6.58567	1.13849	6.66681	3.69907	3.05402	4.28485	0.853825	2.69393	3.30594	0.38356	3.35369	1.72125	3.69842	2.3049	1.57252	3.79571	1.21607	4.61832
Cytidine	218.911	127.547	207.986	217.955	163.922	218.817	78.1823	140.713	148.962	73.466	149.467	118.069	235.166	215.193	118.627	190.647	133.641	163.136
Cytosine	59.6895	34.8454	58.1008	59.6724	46.1371	60.2602	22.0615	39.3172	42.444	20.987	43.1193	31.4288	63.2077	61.1427	32.469	51.9637	37.6748	45.081
Thiamine	468.412	158.146	234.502	192.477	119.529	251.452	137.255	238.915	171.245	126.554	111.169	94.7878	214.039	103.807	302.179	290.495	288.323	79.2383
Glycine	1732.2	1046.8	1089.4	1607.76	817.038	1688.28	1446.5	1681.58	1242.75	953.745	1010.7	1354.52	1621.8	1058.18	1565.53	1844.44	1682.99	1383.59
Sarcosine	3.70346	4.45286	5.24734	6.60265	3.67292	5.87182	1.84562	3.70153	3.32189	3.25739	4.55189	5.59787	6.81991	4.98376	3.53599	2.95759	4.70871	4.05709
Alanine	85.6997	47.7924	56.8664	62.0271	30.6762	80.8733	45.5313	91.4411	43.8967	33.0033	36.5356	34.9875	69.9468	31.2222	59.3039	64.6762	60.0645	25.1168
Dimethylglycine	3.39256	3.45397	4.99506	2.98511	4.09517	3.33266	3.86044	4.52233	3.52208	3.14481	6.11145	4.70209	3.27559	8.58314	3.64459	3.7516	4.63351	4.70284
Serine	11.6344	9.51467	11.1439	9.2457	7.2533	10.139	10.8811	16.9686	7.62351	8.68257	10.6982	23.0733	9.68393	8.20198	14.9498	14.914	18.4822	9.94325
Proline	326.642	151.077	256.417	281.75	169.345	318.321	150.528	263.235	195.045	128.531	237.462	264.179	307.809	193.547	229.438	257.997	245.076	174.266
Guanidoacetic acid	0	1.47787	3.59914	0.182965	0.468515	0.133228	0.491991	0.852377	0	0.0133578	7.64882	0.247639	0.0375856	10.9887	0.0173759	0.0147039	0.0207432	0.145379
Valine	22254.4	11944.2	15569.1	14288	9840.65	17274.7	13077	18945.6	11952.4	9801.89	11647.8	11557.5	14621.1	9980.69	18081.7	16955.9	19117.8	8532.87
Betaine	977.886	1019.15	815.897	851.577	626.534	964.372	898.5	1199.46	832.449	857.364	824.202	679.782	869.509	895.933	1112.53	962.76	1228.91	898.203
Threonine	50.3057	37.2572	36.9366	37.3209	22.9977	44.5549	33.3851	63.7362	30.7155	30.097	26.1226	33.9602	38.5346	24.0774	49.4973	40.9714	54.9099	23.1187
Hydroxyproline	4.89037	3.117	3.09795	3.46241	1.92612	4.68061	2.79576	5.37471	3.06322	2.63912	2.67534	2.46111	4.32422	2.17545	4.25709	4.07719	4.41571	1.92036
Creatine	864.367	1203.35	1426.94	1909.13	1038.19	1631.54	549.411	1025.75	870.963	914.645	1577.48	1716.67	1983.93	1840.39	950.389	845.081	1269.74	1237.92
Isoleucine	28650.5	12916.9	17981	16341.5	10731.7	20929.4	14142.8	22270.1	13748.2	11190	11910.2	12554.9	17371.2	10203.4	22896.6	20308.4	23358.1	8935.07
Leucine	34025.3	16396.4	20805.6	20328.1	11680.1	25262.5	16403.3	26967	17216	13259.2	13798.5	14795.9	21711.8	11704	26282.2	24051.7	28338.2	10003.4
Alloisoleucine	3.6096	2.11812	3.22913	3.09847	2.67805	3.2778	2.5016	3.85937	2.71066	2.57042	4.15249	2.72709	3.17223	8.7881	4.20713	4.68005	3.81675	2.71825
beta-Leucine	2.50678	2.47194	3.82787	2.04642	3.8291	2.56856	3.42051	4.11719	2.56715	3.13717	4.24124	5.71711	2.51824	5.26782	3.18196	4.01207	4.23161	28.4503
Asparagine	14.0493	10.8	13.3774	12.8394	8.11514	13.3385	9.47017	18.7207	8.03808	6.38884	10.8282	10.2327	12.9727	8.81327	12.7995	11.3598	13.5583	7.08976
Ornithine	9.76314	3.66819	6.62308	5.24036	5.14499	6.98467	7.17161	8.22912	5.01383	3.79171	8.5966	15.904	6.7842	5.28221	8.51201	15.5063	12.6352	5.83545
Proline betaine	7.13122	4.89092	8.42265	5.42133	30.1729	5.3154	7.59592	6.62171	5.23352	6.90789	20.8322	8.83247	4.72075	8.7018	5.52336	6.86883	6.6119	151.63
4-Guanidinobutanoic acid	3.58418	4.11829	6.41117	7.51151	10.397	3.1093	8.51222	6.72694	7.52961	22.5403	14.4545	10.5507	3.69467	13.6999	8.80305	6.67348	7.75277	13.0334
Glutamine	590.405	489.67	366.718	422.448	169.009	500.251	387.481	1023.79	295.038	230.336	239.101	172.611	435.217	173.86	396.05	403.028	371.729	146.508
Lysine	164.704	69.7414	92.6021	86.6757	58.5788	117.987	69.9772	119.525	75.11	52.0687	56.4675	61.8946	94.0129	48.7444	112.58	113.43	117.736	42.5825
Methionine	36.1547	17.4745	22.1902	22.6757	11.1749	28.2404	16.8084	29.1229	17.334	14.0333	11.8615	11.37	23.974	9.36702	27.6168	26.507	28.0967	7.90118
S-Methylcysteine S-oxide	15.6644	13.3538	19.5329	17.2305	12.0917	16.8024	13.8981	35.6893	16.1984	12.9933	153.087	14.5007	19.599	306.968	16.5831	16.5377	22.2912	16.3332
Histidine	111.548	60.0654	77.3646	75.2762	45.7438	97.0546	59.5361	100.002	92.7718	48.6319	59.0826	65.8874	82.4534	46.2382	96.7771	93.6115	99.4559	42.2411
N(6)-Methyllysine	10.907	10.7157	7.32946	17.0336	7.12027	19.0242	7.661	14.964	13.4417	11.772	8.17818	8.89056	20.1703	10.9204	13.0623	11.74	15.9282	6.05859
Methionine sulfoxide	3.26546	1.67524	2.02157	1.945	1.83646	2.22765	2.34281	3.47002	2.81519	1.32242	2.87187	3.89803	2.12922	2.11432	2.58683	2.52907	3.81934	2.17054
Phenylalanine	25644.5	11432.5	15255.2	15668.6	9016.59	19225.7	12124.1	20034.5	12426.1	10147	10486.2	11413.2	16742.3	8638.41	19774.5	17904.4	21925.4	7407.6
N-Acetylleucine	10.6919	8.59281	31.3024	7.55924	24.6404	8.11907	21.8975	33.4453	18.0339	11.524	89.1897	15.5891	9.27237	171.479	10.6536	34.3841	13.4286	34.705
N-Acetylornithine	1.32574	0.594517	0.790465	1.30661	0.396213	1.50273	0.663797	1.05495	1.05592	0.576294	0.519853	0.403561	1.14072	0.179789	1.5117	1.21412	1.37942	0.544326
Arginine	942.093	360.21	471.642	447.107	323.162	664.674	369.894	658.153	399.206	303.316	287.622	283.978	508.398	236.426	625.416	603.174	718.418	205.593
Tyrosine	6762.39	3281.78	4519.24	4497.05	2457.76	5438.92	3490.83	5481.42	3502.2	2873.02	3095.74	3674.92	4818.85	2716.1	5707.47	5025.83	6190.86	2313.83
Homoarginine	5.13088	3.30234	2.46558	6.42366	1.7873	5.26054	1.45775	3.20431	3.81441	2.8891	1.18552	1.53781	5.20937	2.48469	4.58071	4.43638	6.80377	1.56198
N-6-Trimethyllysine	21.1531	12.3717	9.4923	15.4824	5.92584	19.7452	11.3158	20.507	12.9864	7.36015	10.0389	5.83634	16.5771	5.98338	14.4502	16.3991	15.7208	4.3918
Phenylacetylglycine	2.74533	2.88353	1.86011	1.92312	2.626	2.62733	1.88727	6.3139	1.64588	1.48462	1.72756	0.859095	1.78532	1.6181	3.25798	1.4893	2.5929	1.40984
Dimethylarginine	2211.56	1244.03	659.439	1494.08	741.043	2211.63	1356.12	2557.94	1708.96	898.695	951.509	1304.19	2417.32	642.703	1413.02	2039.23	1531.77	563.056
Symmetric dimethyl-arginine	917.549	319.973	488.783	503.382	444.349	789.832	478.577	801.287	566.397	366.441	549.549	334.463	681.173	303.815	760.57	784.486	782.234	222.619
Tryptophan	6332.33	3635.86	4600.69	4808.63	2458.27	5281.35	3551.19	5560.38	3840.92	3337.07	3270.18	4339.52	5048.68	2951.8	5825.03	4922.51	6141.44	2460.65
N-Acetylarginine	0.424314	0.406775	0.635735	0.258537	1.19732	0.213557	0.309772	0.786607	0.526187	0.387376	1.12212	1.58061	0.251824	0.338004	0.351861	0.245766	0.604146	0.990606
5-Hydroxy-tryptophan	0.678512	6.40249	3.02731	0.176999	1.3506	0.288007	3.83961	7.81609	0.246262	5.91178	1.20137	1.03336	0.201083	1.08593	8.62061	0.30038	8.03281	0.950035
alpha-N-Phenylacetylglutamine	9.21955	10.5834	12.3884	6.79954	82.2533	9.22407	8.53565	20.7043	4.47347	6.43846	73.1472	0.681773	8.24628	13.1642	9.44813	5.57909	10.0682	7.76257
C-Glycosyltryptophan	8.76786	2.45028	1.8063	12.905	1.20599	11.5556	1.29375	3.20957	9.35797	3.78789	1.04605	1.87717	12.3694	1.73676	5.22145	7.26374	5.67067	1.06499
Gln-Ala	381.777	49.0344	3.60586	39.8943	63.0095	65.9028	75.3917	48.7354	136.945	153.365	10.3876	59.73	21.4915	4.99814	399.786	201.423	385.069	64.1764
His-Ala	6.13594	8.4484	1.67511	6.74584	0.79821	6.969	5.26092	8.629	5.58608	17.5884	2.51685	1.31769	6.15276	2.6465	22.1629	5.87317	32.4476	0.777609
Ile-Ile	2.14699	2.3901	2.83558	3.29735	2.11699	2.40398	1.15839	2.12568	3.32011	1.26517	3.58509	4.96196	4.64558	3.35127	1.00997	2.19298	1.55315	4.8347
Glu-Lys	1.21428	0.902606	1.98121	2.59731	1.3853	1.99646	0.616941	1.23384	1.5573	0.436991	1.39156	1.84965	3.05195	1.36999	0.692863	1.54601	0.422643	1.19684
Tyr-Lys	0.547502	0.991664	10.794	1.14353	4.73142	0.815041	0.101522	0.836592	0.763591	0.17556	8.90408	10.3978	0.892658	4.69969	0.432225	0.264671	0	4.95303
N-Acetylputrescine	0.418448	0.59211	0.285913	0.336099	0.390429	0.407521	0.726272	0.720837	1.00631	0.837725	1.06507	0.244582	0.240548	0.370366	3.16675	0.422213	1.48314	0.584897
N-Acetylcadaverine	0.64136	0.837619	1.2412	0.706006	0.916785	0.652425	0.814778	0.833961	3.58232	0.713688	1.72756	0.9875	0.717885	0.956478	3.21019	0.701587	0.899736	1.23065
N1-Acetylspermidine	10.1738	11.3873	3.67314	7.70839	1.91166	8.4972	6.54166	9.9444	6.35499	12.1651	4.36487	2.27767	9.02431	3.74321	17.2195	6.91084	26.8236	2.17054
sn-Glycero-3-phosphocholine	2864.77	1456.86	1567.19	6704.01	1373.78	6488.02	1009.25	1491.91	3058.84	819.6	1603	2000.23	6021.45	1923.35	1155.38	2863.17	1317.89	1691.66
Hypotaurine	17.698	7.40619	2.87931	36.3683	1.28408	31.5339	3.77453	6.73746	18.5441	11.6881	3.51535	2.76684	35.8773	6.08766	15.1474	17.2876	16.0967	1.19684
Taurine	2048.14	2355.44	770.834	3204.47	959.163	3053.36	1524.93	3105.17	2038.37	1654.33	882.829	898.503	2831.34	1005.91	1949.56	1889.8	2170.11	664.494
Diethanolamine	6546.58	7040.36	10068.1	6976.19	14334.9	6203.45	9612.43	9066.85	3931.74	8824.22	6719.82	14219.9	5238.59	17874.6	4533.31	6708.28	11461.4	16422
Trimethylamine N-oxide	5985.43	7554.13	10892.6	6586.53	9541.68	6488.6	8168.49	8557.35	6002.32	6021.04	10998.5	9999.56	6184.26	12483.7	7156.21	6481.83	8486.91	11648.5
Spermine	84.5852	100.697	130.982	68.6397	100.693	65.2738	85.0806	83.2041	53.1307	59.4651	97.4028	101.716	62.5218	120.822	78.5715	81.9849	115.184	173.089
Triethanolamine	64.8888	92.5015	168.433	95.458	223.172	103.822	179.488	239.2	87.5366	196.963	216.392	423.671	95.1574	218.332	116.362	262.221	243.966	3483.19
Tributylamine	4924.44	6143.09	8546.3	4924	7463.43	4840.06	6673.5	6922.04	4448.39	4834.84	8135.17	8227.48	4865.83	9389.92	5729.53	5670.18	6883.21	8709.41
Carnitine	555.564	452.752	371.764	837.534	287.367	667.764	271.321	433.907	637.309	505.614	450.681	519.688	798.942	391.232	515.555	525.728	551.111	408.404
Choline	2871.68	1993.16	915.254	3311.69	642.131	3624.12	1591.31	2239.18	2407.85	1715.21	636.326	638.292	3441.88	718.175	2552.75	2655.9	2931.63	476.762
Acetylcholine	2.08833	2.09886	4.19787	3.49423	3.10897	3.44433	2.78534	3.89884	2.13132	1.47508	4.93227	4.2435	4.54974	7.11246	3.50558	2.09006	3.07777	4.07399
Choline phosphate	530.244	534.194	287.487	1137.74	209.822	1006.49	356.519	758.576	600.276	477.585	256.976	294.324	1051.11	300.277	590.143	491.638	748.218	244.805
Cyclohexylamine	28.8749	57.6272	62.9479	35.9526	42.9009	47.9954	48.9934	57.7906	47.7501	44.7543	75.7401	66.1595	33.8816	80.4593	30.5815	39.1439	54.0879	64.7512
N,N-Dicyclohexylamine	803.16	1071.74	2939.74	1720.25	1986.13	1473.34	1685.13	1342.25	2542.55	1598.81	4886.98	3356.87	1471.59	2280.7	2765.77	1385.62	1780.33	2830.37
Methylguanidine	0.236599	0.180521	0.215275	0.155122	0.43381	0.162616	0.359231	0.344634	0.258664	0.232807	0.887555	0.895782	0.199204	0.877371	0.271498	0.235263	0.368192	0.439518
3-Guanidinopropanoic acid	0.958129	1.14089	0.955285	2.09415	0.549493	2.03173	0.806969	1.43115	0.988593	0.757578	1.6705	1.03947	1.72706	1.7871	0.829698	1.18262	1.04494	0.899322
Creatinine	162.549	81.7906	119.784	120.331	247.98	142.907	93.7646	145.801	85.1448	72.9221	404.072	112.312	121.084	146.226	117.85	120.102	126.378	96.6297
Urocanic acid	392.405	194.989	678.605	534.101	426.603	354.858	764.64	578.033	467.061	388.559	1125.21	1955.98	489.092	767.743	527.251	2008.36	1333.24	3602.49
Imidazolepropionic acid	2.27409	2.33715	2.25703	2.54361	3.36058	2.72334	2.06168	2.38087	1.80888	1.52661	3.01135	3.20708	2.17621	3.93738	1.8527	2.27281	2.05617	14.0578
Methylimidazoleacetic acid	1.7305	0.510273	0.992285	0.662254	1.52412	0.883615	0.54926	1.27857	0.774221	0.488514	2.60244	0.712345	1.11253	0.489027	0.999113	1.14901	1.1331	0.395566
Indole	10.4182	11.5221	51.3567	9.42667	17.3148	16.6104	21.4133	17.2659	15.5783	22.4697	22.2111	17.6221	13.1343	33.0453	11.2661	30.5022	16.4208	25.9282
Pterin	2.12939	1.48027	0.218639	3.48031	0.610226	3.97529	1.01522	2.25196	1.53427	1.18503	0.0697364	0.406618	2.48817	0.082703	2.72584	1.37167	3.41226	0.0642373
Pyridoxal	41.1194	14.6704	14.003	23.3599	7.52516	28.019	16.5351	19.0575	33.1179	14.9798	9.00234	7.58205	18.5861	10.0646	24.5304	31.1702	21.1373	7.11343
N1-Methyl-2-pyridone-5-carboxamide	3.46295	3.06405	2.37476	1.85153	8.19612	1.95923	2.96236	4.80646	1.37482	1.64492	8.90725	2.6476	1.79847	1.75115	2.47389	2.36733	2.76144	3.25243
Niacinamide	1467.58	874.074	407.977	2379.49	236.606	2183.94	594.234	651.713	1665.99	1010.14	253.112	296.116	2728.86	296.839	877.923	1921.66	1285.66	215.888
1-Methyl nicotinamide	181.693	865.949	18.0831	388.321	10.5329	351.42	391.414	1476.08	170.66	317.059	24.4712	13.8495	490.445	16.7456	390.568	155.843	382.73	9.4395
Nicotinic acid	2.28387	4.02201	6.93254	3.38087	5.17969	2.88007	5.70605	5.90876	23.6802	2.85284	13.2658	65.3982	3.23048	26.6555	4.16804	4.53301	5.26099	6.37301
Trigonelline	4.06911	4.47933	6.68027	4.67157	27.1044	4.35146	5.9976	10.3285	4.56206	3.64095	51.2151	14.6535	4.31859	10.194	5.09982	31.1576	9.40704	11.4478
Pyridoxamine	10.4299	8.75889	7.91137	6.82738	7.27355	7.90747	7.62716	7.83976	8.71663	5.83163	7.27161	7.36498	5.41421	8.96069	6.49858	10.4713	10.0734	7.47181
Kynurenic acid	3.78363	2.13978	2.31421	2.48196	2.70697	2.28839	2.52764	2.10727	195.979	3.22495	2.32349	0.461649	2.37729	1.25852	2.81706	2.82525	2.19359	5.2776
Serotonin	0.64527	3.17958	1.45984	0.338087	0.613118	0.440828	1.84041	4.29872	0.232089	3.37952	0.763931	0.452477	0.186049	0.841413	5.039	0.249967	4.83835	0.649134
Allantoin	2692.88	987.707	1250.97	1323.49	705.517	2074.5	1052.89	2011.05	17844.9	826.077	841.085	503.558	1788.69	535.567	1953.91	2081.01	1876.87	435.113
Cer 18:1;O2/4:0	100.637	418.942	150.541	59.6486	1027.37	419.764	185.369	45.8442	380.775	138.381	651.83	78.1501	935.701	165.992	21.659	126.353	72.6375	127.21
Sphinganine	20.285	120.083	163.186	139.736	318.619	132.677	220.576	25.3345	123.408	159.847	37.8764	163.439	100.57	42.8581	152.688	79.4348	168.977	210.617
C20 Sphinganine	0.545547	0.462134	2.90622	2.51179	1.51544	104.799	9.12656	0.260449	0.503155	0.261431	0	112.208	9.02994	3.08159	2.93869	0.957855	41.6705	67.8548
C16 Sphingosine	809.38	40.935	50.6099	34.0991	55.6202	55.7304	85.8537	30.1647	26.3324	43.243	145.48	65.3585	95.1085	10.5321	38.0445	40.7404	53.699	66.5397
C20 Sphingosine	10047.9	97.6259	42.7053	25.3287	61.7774	196.304	352.783	116.584	38.7234	89.8331	180.25	70.727	54.7961	0	51.6194	185.366	4017.71	255.445
Sphingosine	30979.3	2237.88	933.024	2530.69	3190.12	2466.39	4088.08	1052.1	719.515	1083.9	4300.79	8011.9	1011.08	97.6291	2718.01	3151.59	8424.09	1256.39
SM 18:1;O2/16:0	31.4657	24.9866	6.46163	47.9945	14.1277	52.9542	15.0357	30.8276	46.1591	22.8323	6.71055	3.01142	28.2437	13.0311	21.4331	25.9314	31.5141	0
Glycodeoxycholic acid/Glycochenodeoxycholic acid	2.27018	6.46988	8.64802	2.23138	2.15459	6.2813	6.86184	8.47115	1.49352	5.36793	4.95763	0.525852	1.65565	1.70081	7.67796	6.52644	2.74847	6.66039
Tridecylamine	775.421	707.304	455.842	572.915	411.446	239.755	716.609	626.66	359.378	813.085	819.121	1343.54	443.362	778.724	368.388	551.405	674.507	1283.58
N-Acetylisoputreanine	2.71796	1.14812	1.49011	2.38053	1.66005	2.57247	1.15839	1.95994	1.90632	2.27655	2.03504	1.05476	2.32655	0.661624	2.50864	2.09216	2.36732	1.1157
N,N-dimethylhexadecylamine	37884.5	50041	76983	32369.8	64808	27954.5	49704.2	34600.5	31129.8	50724.9	16236.7	49045.2	30739.6	10404.2	37308.9	35779.1	50693.8	77642.4
C17:1 anandamide	2.36404	5.39638	6.31363	2.80016	6.03574	2.78211	4.69864	2.93333	4.79769	4.20771	4.93227	3.12759	4.51591	4.61699	2.6672	4.91111	2.79515	5.2066
2-Hydroxycaproic and or 2-Hydroxyisocaproic acid	1551.57	1670.84	2185.33	2109.69	3155.23	1077.46	1505.44	2235.32	1318.72	1102.54	3404.31	1741.24	1278.17	3037.88	3219.38	1435.18	2118.26	3241.56
2-Hydroxyglutaric acid	9007.41	12383.4	14285.2	9487.85	16258.6	9341	10197.2	23341	9971.18	10337.9	16736.2	7887.39	6872.82	17371.8	15155.1	11368	10302	11814.5
2-Hydroxyvaleric and or 2-Hydroxyisovaleric acid	1134.34	837.799	992.346	980.239	1434.67	578.832	786.748	1095.45	461.723	460.812	2055.21	896.76	780.664	1753.92	3479.6	782.667	972.112	811.35
3-Methyladipic and or Pimelic acid	1267.42	2264.02	2229.44	1843.09	2432.53	976.13	1630.18	1735.27	1585.31	1676.73	4519.67	3198.95	1654.57	3977.25	7049.38	1320.09	1725.83	2852.68
3-Phosphoglyceric acid	1158.99	897.588	436.622	1305.91	605.769	1813.24	1609.11	1469.32	673.459	587.963	197.792	407.419	1851.11	1572.17	2107.7	1222.42	3695.8	194.71
ADP	4620.55	6289.98	3342.71	11139.5	3653.7	8926.64	3858.07	6264.48	5726.52	7352.52	2462.59	5219.94	8492.88	7445.06	8433.3	4790.81	13455.1	4243.66
Aminoadipic acid	429.791	0	0	938.045	0	691.028	0	0	707.826	0	0	0	756.386	0	0	346.265	163.15	0
AMP	7221.83	17427.8	7827.39	16761.6	4763.69	12879	16546.9	19845.2	9852.99	13037.9	5935.6	5676.56	16471.9	20000.4	19822.6	7660.08	30086.6	4559.16
Aspartic acid	14881.6	27780.4	9316.22	26393.1	8354.18	23679	18930.8	30226.2	18226.5	18359.8	7513.52	8761.14	23442.4	29880.2	20198.6	16382.6	28402.9	7371.61
ATP	531.679	969.491	237.694	2193.91	586.855	1746.83	178.033	1296.7	952.035	2546.52	0	1876.18	1868.86	1588.91	2711.73	565.794	5057.6	1502.98
cis-Aconitic acid	4929.95	3879.04	1562.22	6755.83	1287.34	5869.23	2881.2	3597.35	4320.73	2893.49	2220.04	1200.18	10637.1	5007.38	5254.82	5933.14	6299.45	1326.87
Citric and or Isocitric acid	106715	86916.3	37829	140013	30101.1	117192	66963.6	82520.5	94432.3	66371.1	47207.9	33798.8	199504	110214	110149	130161	140300	37373.7
CMP	490.593	730.618	285.923	1348.96	71.0986	927.315	594.184	1024.36	515.98	453.381	111.068	281.055	1612.93	791.094	531.873	500.456	1008.5	0
Dihexose	2757.23	12664.9	2392.17	5792.64	4374.71	1563.06	1294.97	3357.37	2463.01	1418.21	10061.8	4607.85	7066.86	14049	2810.11	1782.45	53382.6	5950.77
Erythronic and or Threonic acid	7035.33	9688.69	16446.3	10575.4	13534.9	13354	11812	16527.5	6598.43	7795.51	14116.2	10456.9	8504.98	19334.1	8748.8	8586.72	12899.2	10684.4
Ethyl glucuronide	1404.41	4730.32	0	3121.71	0	2896.86	2336.38	6545.5	1706.81	1175.93	0	0	3266.95	4347.7	1409.73	1232.16	1413.5	0
Folic acid	1384.68	0	0	334.146	0	824.753	0	0	543.852	183.086	135.828	0	264.988	0	491.611	437.91	519.101	0
Fumaric and or Maleic acid	51910.9	53772	46683.5	87293.3	47534.9	84182.8	43756.4	66700.7	63870.1	53026.1	36612.1	36263.7	94547.5	70565.5	60079.5	49978.5	83137.9	35478
GDP	228.819	496.674	0	1061.77	0	610.593	271.376	460.068	457.853	540.657	0	440.749	973.356	752.936	983.59	312.502	1383.43	256.506
Glutamic acid	100004	96217.2	65625	190301	55193.3	167289	76865.2	109615	117128	92861.8	63394.4	79931.8	182780	114985	105408	106692	144282	61427.6
Glutathione	28703.7	73921.1	21637.4	54870.1	20553.4	48611.3	52849.5	69407.6	30717.2	69812.6	19337.5	29548.1	55420.5	72479.7	88202.7	33537.6	128253	18700.9
Glyceric acid	3039.15	4537.09	4547.31	2416.65	6601.49	3726.43	6701.07	6076.49	2811.21	3009.81	4726.63	4372.61	1660.4	6706.9	4126.41	5382.18	6840.48	6408.82
GMP	965.164	1128.94	715.878	2413.69	507.523	2120.43	959.093	1382.84	1159.64	928.386	215.115	748.544	2903.03	1452.61	1473.93	1120.79	2536.26	324.828
Guanosine	3563.32	999.907	1484.18	3537.66	1378.19	3701.84	988.99	1207.4	2964.91	864.311	1056.32	1419.33	4308.9	1432.66	829.24	3606.62	1453.56	1158.68
Hexose	46948.5	17971.3	28057.9	17481.2	18220.1	26925.5	25154.7	28105.8	19440.5	16105.1	16498.9	13661.4	16555.2	27539.9	32690.3	29419	33823.3	13863.5
Hexose diphosphate	1095.24	969.58	626.462	3559.65	908.068	2572.05	1003.02	1613.03	1179.18	948.199	0	1298.39	3449.87	1812.4	1883.91	1084.88	3269	557.015
Hexose monophosphate	2764.13	3419.93	1177.42	4115.34	1152.14	3489.48	1236.77	1591.31	2931	2985.73	1638.45	2068.27	5619.41	2817.62	2548.47	3578.73	3981.55	1122.82
Hydroxybutyric and or Hydroxyisobutyric acid	2686.69	0	0	2030.83	1972.55	1366.23	1321.69	1819.94	1092.14	935.313	2329.33	0	1427.98	2683.05	3468.86	1432.39	1601.21	1420.99
Hypoxanthine	11723.5	15227.5	3134.31	22971.2	917.525	15195.8	8874.09	9969.7	14453.5	9228.55	2031.05	1444	26214.8	7286.55	6630.75	11585.2	10710.1	976.846
IMP	0	495.341	0	635.696	471.661	454.472	473.477	722.653	282.343	551.637	231.728	1136.11	559.501	701.814	981.665	0	1888.88	784.864
Inosine	22182.2	23598.8	15566.4	41458.5	6189.47	29155.7	19628.7	20181.5	24592.6	13477.7	9182.06	6880.07	53225.2	16892.8	13180.6	26078	17297.8	5332.11
Ketocaproic and or Ketoisocaproic acid	11618	2585.42	8314.14	5678.08	4935.71	7562.64	4450.43	4989.22	4001.77	2648.06	5968.37	3513.62	6277.04	6171.52	6093.57	7037.59	5362.25	3110.5
Ketoisovaleric acid	2216.83	0	1785.12	0	0	1448.79	0	0	0	0	0	0	1027.48	0	0	1265.47	0	0
Lactic acid	468261	153584	335405	444812	228203	353527	180024	201235	208487	99359	572082	245731	417398	358293	306996	385962	280481	218127
Malic acid	87916.7	91558.6	77031.8	151368	83099.6	145209	76107.2	113608	110606	89357.8	64107.4	63175.4	162930	124229	102627	87603.4	145202	66784.2
Myo-inositol	481856	639694	39861.9	650204	48077.6	611770	441702	566351	544011	782937	54585.6	69994.3	648777	426723	771532	412712	923419	65997.5
N-Acetylglutamic acid	0	740.12	0	612.791	0	487.403	306.656	1364.89	0	274.674	0	0	629.636	1290.12	225.513	310.156	449.951	0
Oxalic acid	1839.09	2929.1	4525.88	1805.51	4081.36	1693.18	3173.25	3423.45	1592.41	1608.85	7512.56	5791.28	2068.49	7004.67	2981.13	2562.31	4017.84	8096.63
Oxoglutaric acid	4330.79	0	0	1758.36	1468.27	4280.26	0	1410.07	895.855	0	0	0	1603.24	0	1001.29	3162.11	1828.07	0
Pantothenic acid	34514.3	256592	35527	39584.4	35830.2	44907.9	141907	370740	47510	113453	34905.1	33600.7	31776.6	222365	101441	33305.7	108598	31946
Pentose 5-phosphate	890.266	1062.09	1021.42	2768.14	853.339	1921.8	714.529	1204.99	1028.86	777.649	863.848	1769.07	3826.62	1725.51	1137.52	1253.27	1891.56	615.805
Pseudouridine	2323.21	611.202	756.142	1093	0	1946.71	672.385	1364.81	948.077	588.837	399.561	0	922.097	708.981	1026.72	1075.13	911.765	0
Ribitol	6078.56	3075.66	2223.47	6288.39	0	6851.41	2862.41	4876.23	5349.93	2999.23	2096.89	0	5717.83	4229.18	4121.34	4330.12	4732.91	0
sn-Glycero-3-phosphate	568.27	2524.8	948.013	1589.21	733.032	1264.26	2721.13	4462.84	637.689	1465.54	1102.92	1384.82	1804.24	5284.7	4028.12	812.163	6020.69	827.112
Sorbitol	76803.2	40865.1	47588.1	42941.4	34243.4	59662.2	44661.1	52949.6	46608.2	43403.7	33790.6	25318.6	44368.3	53494.8	63859.7	54551.7	71942.7	27504.4
Suberic acid	1692.97	3077.99	2459.48	2329.45	3175.51	1673.4	1970.57	2669.61	1904.71	1602.49	4306.75	1940.15	1196.99	3601.67	3121.05	1358.86	2005	3624.79
Succinic acid	59034.4	48648.7	40459.4	71339.7	43218.4	74583	44787.8	48957.9	62601.9	31494	43332.3	29473.6	73082.2	53649.7	51407	55239.7	46446	38340.2
Taurdeoxycholic and or Taurochenodeoxycholic acid	1173.7	799.493	1042.88	686.359	156.562	995.064	943.894	915.953	731.417	767.844	953.548	69.7242	794.526	781.644	1205.76	998.783	463.644	739.753
Taurocholic acid	553.531	721.56	838.232	691.136	762.589	579.152	739.762	586.625	543.724	565.479	804.093	755.688	524.378	826.656	435.628	412.115	756.427	837.025
UDP-galactose or UDP-glucose	4129.21	4974.03	355.131	6842.9	394.912	5046.51	3116.44	4427.62	6067.78	6262.91	596.449	931.708	6492.33	3662.82	6757.61	3933.37	9402.81	632.352
UDP-glucuronic acid	525.854	840.413	0	1377.74	0	762.82	291.813	522.604	860.016	1012.32	0	0	1398.64	573.459	1014.18	525.625	1340.82	0
UMP	5140.14	10303.3	4073.9	11660.8	2766.01	9558.5	8541.16	12077.7	6167.71	5935.65	3105.28	3670.58	12078.3	12391.4	8079.4	5706.56	12825.8	2733.5
Uracil	22776.6	13930.7	8022.87	21343.5	7722.97	23504.4	11276.9	12247	18932.4	10237.9	6433.54	5931.99	22329.8	12924.5	10849.4	20923.6	12331	5349.59
Uric acid	27576.1	16326	23122.9	21797.2	23701	27064.4	17823.4	24338.9	16569.5	14412.3	14255.9	18463.5	20190.1	22383.7	21411.4	18790.4	24562.1	14591.5
Uridine	141417	77026.8	29659.8	134335	29688.5	151176	56442.9	68269.1	114458	51292.6	22550.6	26080.7	143128	65664.6	60226.4	125601	68580.7	19210.9
Xanthine	12489.3	15748.1	8437.31	23915.8	3755.55	17882	7857.24	11881.6	17152	11933.9	6142.91	5152.86	24104.3	9399.14	9056.98	11576.3	14071.2	3411.35
