# Supplementary material for: Multi-omics characterization of partial chemical reprogramming reveals evidence of cell rejuvenation
Source: eLife. 2024 Mar 22;12:RP90579. doi: 10.7554/eLife.90579 (PMC10959535; doi:10.7554/eLife.90579)
Supplement: Figure 7—source data 1. [file elife-90579-fig7-data1.xlsx]

## Sheet: Clock_predictions_chemrep_2.0
	age_months	treatment	cell_type	replicate	sex_mouse_isolated_from	batch	Cell	tAge chronological multi-tissue	tAge biological multi-tissue	Treatment	Age
A1_2c	20	2c	fibroblast	1	male	1	A1	-0.00694038	0.0785669	2c	20
A2_2c	20	2c	fibroblast	2	male	1	A2	0.0366116	0.158774	2c	20
A3_2c	20	2c	fibroblast	3	male	1	A3	-0.0082032	0.0726394	2c	20
A4_2c	20	2c	fibroblast	4	male	1	A4	-0.0421893	0.0540081	2c	20
B1_2c	4	2c	fibroblast	1	male	1	B1	-0.113524	-0.0295005	2c	4
B2_2c	4	2c	fibroblast	2	male	1	B2	-0.0918511	-0.00790691	2c	4
B3_2c	4	2c	fibroblast	3	male	1	B3	-0.124157	-0.0482089	2c	4
B4_2c	4	2c	fibroblast	4	male	1	B4	-0.0838271	0.0280754	2c	4
A1_7c	20	7c	fibroblast	1	male	1	A1	-0.128652	-0.0979652	7c	20
A2_7c	20	7c	fibroblast	2	male	1	A2	-0.137778	-0.107853	7c	20
A3_7c	20	7c	fibroblast	3	male	1	A3	-0.146534	-0.133684	7c	20
B1_7c	4	7c	fibroblast	1	male	1	B1	-0.178203	-0.151667	7c	4
B2_7c	4	7c	fibroblast	2	male	1	B2	-0.149319	-0.147519	7c	4
B3_7c	4	7c	fibroblast	3	male	1	B3	-0.197056	-0.193413	7c	4
B4_7c	4	7c	fibroblast	4	male	1	B4	-0.128755	-0.105216	7c	4
A1control	20	control	fibroblast	1	male	1	A1	0.0997489	0.0878437	Control	20
A2control	20	control	fibroblast	2	male	1	A2	0.0449851	0.0166088	Control	20
A3control	20	control	fibroblast	3	male	1	A3	0.0577059	0.00921086	Control	20
A4control	20	control	fibroblast	4	male	1	A4	0.0260374	-0.0234462	Control	20
B1control	4	control	fibroblast	1	male	1	B1	0.00957797	0.0212607	Control	4
B2control	4	control	fibroblast	2	male	1	B2	-0.00957797	-0.011871	Control	4
B3control	4	control	fibroblast	3	male	1	B3	0.0267188	0.011871	Control	4
B4control	4	control	fibroblast	4	male	1	B4	-0.0401285	-0.0520134	Control	4
