# Supplementary material for: Multi-omics characterization of partial chemical reprogramming reveals evidence of cell rejuvenation
Source: eLife. 2024 Mar 22;12:RP90579. doi: 10.7554/eLife.90579 (PMC10959535; doi:10.7554/eLife.90579)
Supplement: Figure 7—source data 2. [file elife-90579-fig7-data2.xlsx]

## Sheet: mammalian_clock_predictions
SID	PredictedSpeciesLatinName	Sample_Well	Sample_Plate	Sample_Group	Pool_ID	Sentrix_ID	Sentrix_Position	ExternalSampleName	SampleType	Species	Volume (ul)	Tissue	AgeMonths	Age	Genotype	Treatment	Sex	IDATsFound	ExtBasename	CollectionDate	Basename	Row	Col	Project	Entropy	predictedSexByCF	PredictedTissue	Sex.PanMammalianPredictor	maxAgeCaesar	averagedMaturity.yrs	GestationTimeInYears	HighmaxAgeCaesar	Y.pred	UniversalClock2	Y	UniversalClock3	CorSampleVsGoldStandard	fractionFailed	isPCAOutlier	isFractionOutlier	isIACOutlier	DNAmAgePanFinal	DNAmAgeBloodFinal	DNAmAgeLiverFinal	DNAmAgeBrainFinal	DNAmAgeCerebellumFinal	DNAmAgeCortexFinal	DNAmAgeFibroblastFinal	DNAmAgeHeartFinal
ET0308202A	Mus musculus	G01	Clock_ET0308_Mammal320K_Plate1	ET0308202A		207505000000	R01C02	20_2A	gDNA	mouse	50	fibroblasts	20	1.66667	C57BL/6	control	male	FALSE	207505380006_R01C02		207505380006/207505380006_R01C02	1	2	ET0308.Gladyshev.m320k		male	Fibroblast	male	4	0.115068	0.0520548	4	1.22191	1.37538	1.22191	1.39156		0.142286	FALSE	FALSE	FALSE	1.09486	0.253161	0.330648	0.131842	0.346713	0.119928	0.44433	0.15033
ET0308202B	Mus musculus	H01	Clock_ET0308_Mammal320K_Plate1	ET0308202B		207505000000	R02C02	20_2B	gDNA	mouse	50	fibroblasts	20	1.66667	C57BL/6	2c	male	FALSE	207505380006_R02C02		207505380006/207505380006_R02C02	2	2	ET0308.Gladyshev.m320k		male	Fibroblast	male	4	0.115068	0.0520548	4	1.09581	1.30248	1.09581	1.30963		0.127259	FALSE	FALSE	FALSE	1.26365	0.221545	0.404491	0.248215	0.372204	0.170259	0.469409	0.108216
ET0308202C	Mus musculus	A02	Clock_ET0308_Mammal320K_Plate1	ET0308202C		207505000000	R03C02	20_2C	gDNA	mouse	50	fibroblasts	20	1.66667	C57BL/6	7c	male	FALSE	207505380006_R03C02		207505380006/207505380006_R03C02	3	2	ET0308.Gladyshev.m320k		male	Fibroblast	male	4	0.115068	0.0520548	4	0.598548	1.10378	0.598548	0.986549		0.131822	FALSE	FALSE	FALSE	0.621589	0.206289	0.349351	0.030059	0.239185	0.00144907	0.18943	0.0144752
ET0308203A	Mus musculus	E02	Clock_ET0308_Mammal320K_Plate1	ET0308203A		207505000000	R01C01	20_3A	gDNA	mouse	50	fibroblasts	20	1.66667	C57BL/6	control	male	FALSE	207505380007_R01C01		207505380007/207505380007_R01C01	1	1	ET0308.Gladyshev.m320k		male	Fibroblast	male	4	0.115068	0.0520548	4	1.18188	1.44644	1.18188	1.36555		0.147112	FALSE	FALSE	FALSE	1.06182	0.253252	0.456055	0.197019	0.412137	0.243491	0.803638	0.148231
ET0308203B	Mus musculus	F02	Clock_ET0308_Mammal320K_Plate1	ET0308203B		207505000000	R02C01	20_3B	gDNA	mouse	50	fibroblasts	20	1.66667	C57BL/6	2c	male	FALSE	207505380007_R02C01		207505380007/207505380007_R02C01	2	1	ET0308.Gladyshev.m320k		male	Fibroblast	male	4	0.115068	0.0520548	4	1.33489	1.37396	1.33489	1.46496		0.139578	FALSE	FALSE	FALSE	0.962888	0.210541	0.367195	0.117886	0.379628	0.200783	0.29319	0.201168
ET0308203C	Mus musculus	G02	Clock_ET0308_Mammal320K_Plate1	ET0308203C		207505000000	R03C01	20_3C	gDNA	mouse	50	fibroblasts	20	1.66667	C57BL/6	7c	male	FALSE	207505380007_R03C01		207505380007/207505380007_R03C01	3	1	ET0308.Gladyshev.m320k		male	Fibroblast	male	4	0.115068	0.0520548	4	0.701481	1.0398	0.701481	1.05343		0.13482	FALSE	FALSE	FALSE	0.523155	0.21177	0.424294	0.0177492	0.240798	0.0173413	0.217796	0.00972234
ET0308204A	Mus musculus	C03	Clock_ET0308_Mammal320K_Plate1	ET0308204A		207505000000	R01C02	20_4A	gDNA	mouse	50	fibroblasts	20	1.66667	C57BL/6	control	male	FALSE	207505380007_R01C02		207505380007/207505380007_R01C02	1	2	ET0308.Gladyshev.m320k		male	Fibroblast	male	4	0.115068	0.0520548	4	1.00912	1.26064	1.00912	1.2533		0.124805	FALSE	FALSE	FALSE	1.09468	0.265934	0.397263	0.149102	0.415688	0.189919	0.531283	0.178291
ET0308204B	Mus musculus	D03	Clock_ET0308_Mammal320K_Plate1	ET0308204B		207505000000	R02C02	20_4B	gDNA	mouse	50	fibroblasts	20	1.66667	C57BL/6	2c	male	FALSE	207505380007_R02C02		207505380007/207505380007_R02C02	2	2	ET0308.Gladyshev.m320k		male	Fibroblast	male	4	0.115068	0.0520548	4	1.1711	1.23658	1.1711	1.35855		0.143435	FALSE	FALSE	FALSE	1.04006	0.209621	0.354536	0.144426	0.371229	0.186176	0.613393	0.140105
ET0308204C	Mus musculus	E03	Clock_ET0308_Mammal320K_Plate1	ET0308204C		207505000000	R03C02	20_4C	gDNA	mouse	50	fibroblasts	20	1.66667	C57BL/6	7c	male	FALSE	207505380007_R03C02		207505380007/207505380007_R03C02	3	2	ET0308.Gladyshev.m320k		male	Fibroblast	male	4	0.115068	0.0520548	4	0.688941	1.13157	0.688941	1.04528		0.148426	FALSE	FALSE	FALSE	0.559628	0.19064	0.337712	0.0347641	0.20492	-0.0144989	0.286088	0.00108988
ET0308205A	Mus musculus	H03	Clock_ET0308_Mammal320K_Plate1	ET0308205A		207505000000	R06C02	20_5A	gDNA	mouse	50	fibroblasts	20	1.66667	C57BL/6	control	male	FALSE	207505380007_R06C02		207505380007/207505380007_R06C02	6	2	ET0308.Gladyshev.m320k		male	Fibroblast	male	4	0.115068	0.0520548	4	1.03011	1.26831	1.03011	1.26694		0.162178	FALSE	FALSE	FALSE	0.945177	0.239199	0.379776	0.165949	0.353939	0.151164	0.606198	0.0759981
ET0308205B	Mus musculus	A04	Clock_ET0308_Mammal320K_Plate1	ET0308205B		207505000000	R01C01	20_5B	gDNA	mouse	50	fibroblasts	20	1.66667	C57BL/6	2c	male	FALSE	207505380014_R01C01		207505380014/207505380014_R01C01	1	1	ET0308.Gladyshev.m320k		male	Fibroblast	male	4	0.115068	0.0520548	4	1.44293	1.44374	1.44293	1.53516		0.128699	FALSE	FALSE	FALSE	1.45839	0.213151	0.415174	0.242476	0.392056	0.242577	0.509723	0.236821
ET0308205C	Mus musculus	B04	Clock_ET0308_Mammal320K_Plate1	ET0308205C		207505000000	R02C01	20_5C	gDNA	mouse	50	fibroblasts	20	1.66667	C57BL/6	7c	male	FALSE	207505380014_R02C01		207505380014/207505380014_R02C01	2	1	ET0308.Gladyshev.m320k		male	Fibroblast	male	4	0.115068	0.0520548	4	0.71357	1.03653	0.71357	1.06128		0.137225	FALSE	FALSE	FALSE	0.630547	0.227332	0.326341	0.0346416	0.226525	-0.00154918	0.236529	-0.000376636
ET0308206A	Mus musculus	D04	Clock_ET0308_Mammal320K_Plate1	ET0308206A		207505000000	R04C01	20_6A	gDNA	mouse	50	fibroblasts	20	1.66667	C57BL/6	control	male	FALSE	207505380014_R04C01		207505380014/207505380014_R04C01	4	1	ET0308.Gladyshev.m320k		male	Fibroblast	male	4	0.115068	0.0520548	4	1.15133	1.36698	1.15133	1.3457		0.11965	FALSE	FALSE	FALSE	0.98765	0.199058	0.34928	0.113786	0.397203	0.141944	0.518885	0.159241
ET0308206B	Mus musculus	E04	Clock_ET0308_Mammal320K_Plate1	ET0308206B		207505000000	R05C01	20_6B	gDNA	mouse	50	fibroblasts	20	1.66667	C57BL/6	2c	male	FALSE	207505380014_R05C01		207505380014/207505380014_R05C01	5	1	ET0308.Gladyshev.m320k		male	Fibroblast	male	4	0.115068	0.0520548	4	1.18488	1.3278	1.18488	1.3675		0.120392	FALSE	FALSE	FALSE	1.0348	0.221815	0.44054	0.15216	0.353334	0.185782	0.524896	0.149306
ET0308206C	Mus musculus	F04	Clock_ET0308_Mammal320K_Plate1	ET0308206C		207505000000	R06C01	20_6C	gDNA	mouse	50	fibroblasts	20	1.66667	C57BL/6	7c	male	FALSE	207505380014_R06C01		207505380014/207505380014_R06C01	6	1	ET0308.Gladyshev.m320k		male	Fibroblast	male	4	0.115068	0.0520548	4	0.519349	0.92027	0.519349	0.935092		0.13835	FALSE	FALSE	FALSE	0.48609	0.1842	0.32919	0.059334	0.19909	0.007436	0.295404	0.0168041
ET030841A	Mus musculus	A01	Clock_ET0308_Mammal320K_Plate1	ET030841A		207505000000	R01C01	4_1A	gDNA	mouse	50	fibroblasts	4	0.333333	C57BL/6	control	male	FALSE	207505380006_R01C01		207505380006/207505380006_R01C01	1	1	ET0308.Gladyshev.m320k		male	Fibroblast	male	4	0.115068	0.0520548	4	-0.104019	0.512085	-0.104019	0.533475		0.105326	TRUE	FALSE	FALSE	0.554585	0.285419	0.363878	0.0922538	0.554985	0.194967	0.473271	0.0146797
ET030841B	Mus musculus	B01	Clock_ET0308_Mammal320K_Plate1	ET030841B		207505000000	R02C01	4_1B	gDNA	mouse	50	fibroblasts	4	0.333333	C57BL/6	2c	male	FALSE	207505380006_R02C01		207505380006/207505380006_R02C01	2	1	ET0308.Gladyshev.m320k		male	Fibroblast	male	4	0.115068	0.0520548	4	0.260586	0.763585	0.260586	0.766969		0.120896	TRUE	FALSE	FALSE	0.626615	0.211541	0.346654	0.119708	0.460344	0.179733	0.245727	0.0538368
ET030841C	Mus musculus	C01	Clock_ET0308_Mammal320K_Plate1	ET030841C		207505000000	R03C01	4_1C	gDNA	mouse	50	fibroblasts	4	0.333333	C57BL/6	7c	male	FALSE	207505380006_R03C01		207505380006/207505380006_R03C01	3	1	ET0308.Gladyshev.m320k		male	Fibroblast	male	4	0.115068	0.0520548	4	-0.0202082	0.6414	-0.0202082	0.584664		0.140242	TRUE	FALSE	FALSE	0.318592	0.201568	0.355039	0.00147654	0.21107	-0.0183735	0.0946379	-0.0230404
ET030842A	Mus musculus	D01	Clock_ET0308_Mammal320K_Plate1	ET030842A		207505000000	R04C01	4_2A	gDNA	mouse	50	fibroblasts	4	0.333333	C57BL/6	control	male	FALSE	207505380006_R04C01		207505380006/207505380006_R04C01	4	1	ET0308.Gladyshev.m320k		male	Fibroblast	male	4	0.115068	0.0520548	4	0.607304	0.924298	0.607304	0.992237		0.130719	FALSE	FALSE	FALSE	0.618677	0.240169	0.435453	0.201499	0.417757	0.172195	0.25295	0.114648
ET030842B	Mus musculus	E01	Clock_ET0308_Mammal320K_Plate1	ET030842B		207505000000	R05C01	4_2B	gDNA	mouse	50	fibroblasts	4	0.333333	C57BL/6	2c	male	FALSE	207505380006_R05C01		207505380006/207505380006_R05C01	5	1	ET0308.Gladyshev.m320k		male	Fibroblast	male	4	0.115068	0.0520548	4	0.737516	1.0409	0.737516	1.07684		0.134071	FALSE	FALSE	FALSE	0.720043	0.20413	0.438521	0.365455	0.345778	0.14883	0.197287	0.163413
ET030842C	Mus musculus	F01	Clock_ET0308_Mammal320K_Plate1	ET030842C		207505000000	R06C01	4_2C	gDNA	mouse	50	fibroblasts	4	0.333333	C57BL/6	7c	male	FALSE	207505380006_R06C01		207505380006/207505380006_R06C01	6	1	ET0308.Gladyshev.m320k		male	Fibroblast	male	4	0.115068	0.0520548	4	0.061251	0.659129	0.061251	0.637458		0.142488	FALSE	FALSE	FALSE	0.404615	0.206439	0.435645	0.0590215	0.191683	-0.00556923	0.126093	-0.0185602
ET030843A	Mus musculus	B02	Clock_ET0308_Mammal320K_Plate1	ET030843A		207505000000	R04C02	4_3A	gDNA	mouse	50	fibroblasts	4	0.333333	C57BL/6	control	male	FALSE	207505380006_R04C02		207505380006/207505380006_R04C02	4	2	ET0308.Gladyshev.m320k		male	Fibroblast	male	4	0.115068	0.0520548	4	0.478539	0.89796	0.478539	0.908577		0.146479	FALSE	FALSE	FALSE	0.832412	0.195769	0.431222	0.26121	0.390878	0.157086	0.212978	0.0897653
ET030843B	Mus musculus	C02	Clock_ET0308_Mammal320K_Plate1	ET030843B		207505000000	R05C02	4_3B	gDNA	mouse	50	fibroblasts	4	0.333333	C57BL/6	2c	male	FALSE	207505380006_R05C02		207505380006/207505380006_R05C02	5	2	ET0308.Gladyshev.m320k		male	Fibroblast	male	4	0.115068	0.0520548	4	0.589787	0.902586	0.589787	0.980856		0.154336	FALSE	FALSE	FALSE	0.770352	0.199329	0.430791	0.186557	0.410389	0.146874	0.141599	0.174218
ET030843C	Mus musculus	D02	Clock_ET0308_Mammal320K_Plate1	ET030843C		207505000000	R06C02	4_3C	gDNA	mouse	50	fibroblasts	4	0.333333	C57BL/6	7c	male	FALSE	207505380006_R06C02		207505380006/207505380006_R06C02	6	2	ET0308.Gladyshev.m320k		male	Fibroblast	male	4	0.115068	0.0520548	4	0.176042	0.736135	0.176042	0.712039		0.153771	FALSE	FALSE	FALSE	0.342233	0.15798	0.482559	0.0692742	0.218288	-0.00371649	0.0488797	0.0269355
ET030844A	Mus musculus	H02	Clock_ET0308_Mammal320K_Plate1	ET030844A		207505000000	R04C01	4_4A	gDNA	mouse	50	fibroblasts	4	0.333333	C57BL/6	control	male	FALSE	207505380007_R04C01		207505380007/207505380007_R04C01	4	1	ET0308.Gladyshev.m320k		male	Fibroblast	male	4	0.115068	0.0520548	4	0.518417	0.957543	0.518417	0.934486		0.134878	FALSE	FALSE	FALSE	0.601531	0.202762	0.421875	0.23964	0.366069	0.174014	0.300986	0.141317
ET030844B	Mus musculus	A03	Clock_ET0308_Mammal320K_Plate1	ET030844B		207505000000	R05C01	4_4B	gDNA	mouse	50	fibroblasts	4	0.333333	C57BL/6	2c	male	FALSE	207505380007_R05C01		207505380007/207505380007_R05C01	5	1	ET0308.Gladyshev.m320k		male	Fibroblast	male	4	0.115068	0.0520548	4	0.689755	0.995696	0.689755	1.04581		0.11777	FALSE	FALSE	FALSE	0.739077	0.244069	0.451499	0.244388	0.406106	0.162742	0.190584	0.169667
ET030844C	Mus musculus	B03	Clock_ET0308_Mammal320K_Plate1	ET030844C		207505000000	R06C01	4_4C	gDNA	mouse	50	fibroblasts	4	0.333333	C57BL/6	7c	male	FALSE	207505380007_R06C01		207505380007/207505380007_R06C01	6	1	ET0308.Gladyshev.m320k		male	Fibroblast	male	4	0.115068	0.0520548	4	0.128424	0.728012	0.128424	0.681101		0.140764	FALSE	FALSE	FALSE	0.433303	0.245853	0.387098	0.0619324	0.229805	-0.000274997	0.128739	0.00133945
ET030845A	Mus musculus	F03	Clock_ET0308_Mammal320K_Plate1	ET030845A		207505000000	R04C02	4_5A	gDNA	mouse	50	fibroblasts	4	0.333333	C57BL/6	control	male	FALSE	207505380007_R04C02		207505380007/207505380007_R04C02	4	2	ET0308.Gladyshev.m320k		male	Fibroblast	male	4	0.115068	0.0520548	4	0.407503	0.83427	0.407503	0.862423		0.151335	FALSE	FALSE	FALSE	0.749169	0.248974	0.421693	0.182318	0.420454	0.159694	0.279982	0.137924
ET030845C	Mus musculus	G03	Clock_ET0308_Mammal320K_Plate1	ET030845C		207505000000	R05C02	4_5C	gDNA	mouse	50	fibroblasts	4	0.333333	C57BL/6	7c	male	FALSE	207505380007_R05C02		207505380007/207505380007_R05C02	5	2	ET0308.Gladyshev.m320k		male	Fibroblast	male	4	0.115068	0.0520548	4	0.0732541	0.681452	0.0732541	0.645256		0.153178	FALSE	FALSE	FALSE	0.428947	0.18535	0.395331	0.0352565	0.242168	-0.00765047	0.0916332	-0.00152059
ET030846B	Mus musculus	C04	Clock_ET0308_Mammal320K_Plate1	ET030846B		207505000000	R03C01	4_6B	gDNA	mouse	50	fibroblasts	4	0.333333	C57BL/6	2c	male	FALSE	207505380014_R03C01		207505380014/207505380014_R03C01	3	1	ET0308.Gladyshev.m320k		male	Fibroblast	male	4	0.115068	0.0520548	4	0.75733	1.02279	0.75733	1.08971		0.132452	FALSE	FALSE	FALSE	0.762557	0.196232	0.408825	0.183156	0.383215	0.223799	0.132184	0.13638
ET0308iPSC1	Mus musculus	G04	Clock_ET0308_Mammal320K_Plate1	ET0308iPSC1		207505000000	R01C02	iPSC_1	gDNA	mouse	50	iPSCs	20	1.66667	C57BL/6	OSKM	male	FALSE	207505380014_R01C02		207505380014/207505380014_R01C02	1	2	ET0308.Gladyshev.m320k		male	mESCs	male	4	0.115068	0.0520548	4	-7.11014	-0.0518309	-7.11014	-0.0515241		0.13581	TRUE	FALSE	TRUE	0.00858628	3.92527	0.0116803	-0.0426571	0.102696	-0.0120684	0.290339	-0.058632
ET0308iPSC2	Mus musculus	H04	Clock_ET0308_Mammal320K_Plate1	ET0308iPSC2		207505000000	R02C02	iPSC_2	gDNA	mouse	50	iPSCs	20	1.66667	C57BL/6	OSKM	male	FALSE	207505380014_R02C02		207505380014/207505380014_R02C02	2	2	ET0308.Gladyshev.m320k		male	mESCs	male	4	0.115068	0.0520548	4	-6.84782	-0.0516263	-6.84782	-0.0513649		0.114989	TRUE	FALSE	TRUE	0.0218518	4.20171	0.020011	-0.0426674	0.109891	0.00333407	0.172442	-0.0586707
ET0308iPSC3	Mus musculus	A05	Clock_ET0308_Mammal320K_Plate1	ET0308iPSC3		207505000000	R03C02	iPSC_3	gDNA	mouse	50	iPSCs	20	1.66667	C57BL/6	OSKM	male	FALSE	207505380014_R03C02		207505380014/207505380014_R03C02	3	2	ET0308.Gladyshev.m320k		male	mESCs	male	4	0.115068	0.0520548	4	-7.07324	-0.0518473	-7.07324	-0.0515042		0.112761	TRUE	FALSE	TRUE	0.0220583	3.38213	0.0235041	-0.0407883	0.120496	0.00719282	0.224156	-0.0584263
ET0308iPSC4	Mus musculus	B05	Clock_ET0308_Mammal320K_Plate1	ET0308iPSC4		207505000000	R04C02	iPSC_4	gDNA	mouse	50	iPSCs	4	0.333333	C57BL/6	OSKM	male	FALSE	207505380014_R04C02		207505380014/207505380014_R04C02	4	2	ET0308.Gladyshev.m320k		male	mESCs	male	4	0.115068	0.0520548	4	-6.97257	-0.0519357	-6.97257	-0.0514459		0.119264	TRUE	FALSE	TRUE	0.0173819	4.17626	0.00663345	-0.044542	0.103512	-0.00445058	0.261274	-0.0586604
ET0308iPSC5	Mus musculus	C05	Clock_ET0308_Mammal320K_Plate1	ET0308iPSC5		207505000000	R05C02	iPSC_5	gDNA	mouse	50	iPSCs	4	0.333333	C57BL/6	OSKM	male	FALSE	207505380014_R05C02		207505380014/207505380014_R05C02	5	2	ET0308.Gladyshev.m320k		male	mESCs	male	4	0.115068	0.0520548	4	-6.93379	-0.0518074	-6.93379	-0.0514218		0.102266	TRUE	FALSE	TRUE	0.00440804	4.17702	0.0237772	-0.0461185	0.122314	0.002422	0.261537	-0.0582766
ET0308iPSC6	Mus musculus	D05	Clock_ET0308_Mammal320K_Plate1	ET0308iPSC6		207505000000	R06C02	iPSC_6	gDNA	mouse	50	iPSCs	4	0.333333	C57BL/6	OSKM	male	FALSE	207505380014_R06C02		207505380014/207505380014_R06C02	6	2	ET0308.Gladyshev.m320k		male	mESCs	male	4	0.115068	0.0520548	4	-6.93296	-0.0518155	-6.93296	-0.0514212		0.106044	TRUE	FALSE	TRUE	0.012161	3.50832	0.017582	-0.050143	0.122939	0.00780739	0.266162	-0.0582141
[truncated: 31 more columns]
