# Supplementary material for: Multi-omics characterization of partial chemical reprogramming reveals evidence of cell rejuvenation
Source: eLife. 2024 Mar 22;12:RP90579. doi: 10.7554/eLife.90579 (PMC10959535; doi:10.7554/eLife.90579)
Supplement: Supplementary file 2. — Normalized peptide and phosphopeptide abundances obtained from TMT 18plex experiments. [file elife-90579-supp2.xlsx]

## Sheet: Proteome-Legend
Columns:	ProteinID	Protein ID	SampleID	treatment	age
	GeneSymbol	Gene Symbol	1	control	4
	Description	Description	2	2c	4
	Peptides	Number of peptides quantified for this protein	3	7c	4
			4	control	4
			5	2c	4
			6	7c	4
			7	control	4
			8	2c	4
			9	7c	4
			10	control	20
			11	2c	20
			12	7c	20
			13	control	20
			14	2c	20
			15	7c	20
			16	control	20
			17	2c	20
			18	7c	20

## Sheet: Protein Quant
				Summed S/N, Column Normalized, Scaled to 100 per Protein																		Summed S/N, Column Normalized
				1	2	3	4	5	6	7	8	9	10	11	12	13	14	15	16	17	18	1	2	3	4	5	6	7	8	9	10	11	12	13	14	15	16	17	18
ProteinID	GeneSymbol	Description	Peptides	126	127n	127c	128n	128c	129n	129c	130n	130c	131	131c	132n	132c	133n	133c	134n	134c	135	126	127n	127c	128n	128c	129n	129c	130n	130c	131	131c	132n	132c	133n	133c	134n	134c	135
P10126	Eef1a1	Elongation factor 1-alpha 1	93	5.05896	4.9271	6.55144	5.16616	5.23514	6.39134	4.81058	4.85278	7.12764	5.15103	5.01165	6.11205	5.45868	5.2557	6.37567	5.2352	5.07563	6.20324	11851.9	11542.9	15348.4	12103	12264.6	14973.3	11270	11368.8	16698.3	12067.6	11741	14319	12788.3	12312.8	14936.6	12264.7	11890.9	14532.6
Q02053	Uba1	Ubiquitin-like modifier-activating enzyme 1	78	5.59212	5.52217	5.62836	5.35434	5.41007	5.87713	5.38449	5.28755	5.11487	5.63058	5.43753	5.84562	5.73622	5.49791	5.58026	5.74515	5.44862	5.90701	9956.3	9831.75	10020.8	9532.96	9632.17	10463.7	9586.63	9414.03	9106.59	10024.8	9681.07	10407.6	10212.8	9788.56	9935.18	10228.7	9700.8	10516.9
P20152	Vim	Vimentin	64	7.03502	6.84396	4.07323	7.04524	6.70423	3.85858	6.36201	6.71625	3.62253	6.45774	6.47032	3.63097	5.98034	6.18617	3.17948	6.2744	5.80268	3.75685	9304.28	9051.59	5387.12	9317.79	8866.79	5103.23	8414.19	8882.69	4791.04	8540.79	8557.44	4802.2	7909.4	8181.62	4205.07	8298.31	7674.44	4968.68
P68134	Acta1	Actin, alpha skeletal muscle	60	4.17078	4.34873	6.49286	4.79936	5.49436	7.23713	3.58209	4.90169	7.43652	3.58125	5.59727	8.61996	3.20091	5.55901	8.94697	2.93337	6.6508	6.44693	5201.12	5423.02	8096.83	5984.97	6851.66	9024.96	4466.99	6112.57	9273.61	4465.95	6979.99	10749.4	3991.65	6932.29	11157.2	3658.02	8293.78	8039.55
P16858	Gapdh	Glyceraldehyde-3-phosphate dehydrogenase	59	5.33048	3.44872	6.40169	5.88278	3.84954	6.27454	6.58256	4.2637	8.55648	5.38889	4.06336	6.75378	5.45757	4.19462	6.87522	5.66007	4.38904	6.62694	5649.18	3654.92	6784.44	6234.51	4079.7	6649.68	6976.12	4518.62	9068.06	5711.08	4306.3	7157.58	5783.87	4445.41	7286.28	5998.48	4651.45	7023.15
P07356	Anxa2	Annexin A2	57	7.74796	7.27256	3.34854	6.879	6.67606	3.44651	7.35886	7.06105	3.2824	6.93944	6.29311	3.05337	6.56867	5.70341	2.77829	6.63073	5.65283	3.3072	5515.9	5177.46	2383.88	4897.27	4752.8	2453.63	5238.9	5026.88	2336.79	4940.31	4480.17	2173.75	4676.35	4060.36	1977.91	4720.53	4024.35	2354.45
A0A087WR50	Fn1	Isoform of P11276, Fibronectin	57	7.98196	4.73532	3.32719	8.58028	2.51643	1.77402	5.98186	2.24927	1.74915	6.10164	8.17292	3.39506	5.52522	2.62077	4.90768	5.85807	22.651	1.87218	7944.11	4712.86	3311.41	8539.59	2504.49	1765.61	5953.49	2238.61	1740.85	6072.7	8134.16	3378.96	5499.02	2608.35	4884.41	5830.29	22543.5	1863.31
P24549	Aldh1a1	Aldehyde dehydrogenase 1A1	56	4.92022	3.40464	7.37246	5.60862	4.3645	7.87824	6.19863	5.0518	10.2978	3.8374	4.10157	4.51535	4.29291	6.80072	3.93205	6.14502	6.19337	5.08465	5230.86	3619.59	7837.92	5962.72	4640.05	8375.63	6589.98	5370.75	10948	4079.67	4360.52	4800.43	4563.94	7230.08	4180.29	6532.98	6584.38	5405.67
Q8VDD5	Myh9	Myosin-9	55	6.14709	5.58939	4.3634	7.0219	5.77349	4.25037	6.69482	6.28103	4.33813	6.22889	5.21087	4.92042	6.03876	6.0326	5.48612	5.8141	5.38754	4.42109	7670.9	6974.95	5445.05	8762.57	7204.69	5304	8354.42	7838.05	5413.51	7772.98	6502.6	6140.15	7535.72	7528.03	6846.09	7255.37	6723.07	5517.04
P52480	Pkm	Pyruvate kinase PKM	54	4.76129	2.97239	7.96785	5.00965	2.99507	8.40564	4.96258	2.9501	8.1653	5.28698	3.2717	8.29647	5.60863	3.74513	8.25434	5.48183	3.43483	8.43023	5554.14	3467.35	9294.66	5843.86	3493.81	9805.35	5788.95	3441.36	9524.99	6167.37	3816.51	9678	6542.58	4368.77	9628.86	6394.66	4006.8	9834.03
E9PZ16	Hspg2	Isoform of Q05793, Basement membrane-specific heparan sulfate proteoglycan core protein	54	6.1537	6.66809	3.75362	6.44065	5.08467	2.8761	4.86716	4.75295	2.79512	4.40293	8.99776	3.8137	3.65833	4.6804	4.74431	3.94065	19.2681	3.10172	4371.58	4736.99	2666.56	4575.42	3612.14	2043.17	3457.62	3376.48	1985.64	3127.83	6391.98	2709.24	2598.87	3324.95	3370.34	2799.43	13688	2203.45
P26039	Tln1	Talin-1	53	7.91879	6.08055	2.58365	7.96927	5.84565	2.50715	7.60045	6.14936	2.03395	7.39919	6.1474	3.18185	7.32597	7.14614	3.50578	7.36477	6.18332	3.05676	10302	7910.55	3361.22	10367.7	7604.95	3261.7	9887.88	8000.07	2646.08	9626.05	7997.52	4139.46	9530.8	9296.84	4560.88	9581.27	8044.25	3976.73
Q6PDQ2	Chd4	Chromodomain-helicase-DNA-binding protein 4	53	6.26827	5.99254	5.17221	6.40724	6.05362	5.17225	6.00708	5.94704	4.58124	6.11616	5.55484	4.4543	6.09202	5.91642	4.01823	5.96965	5.60582	4.67107	6387.15	6106.19	5270.31	6528.76	6168.43	5270.35	6121.01	6059.83	4668.13	6232.16	5660.19	4538.78	6207.56	6028.63	4094.44	6082.87	5712.14	4759.66
E9Q616	Ahnak	AHNAK nucleoprotein (desmoyokin)	52	9.34437	6.53528	0.631865	10.1313	6.62224	0.505967	9.05754	6.66673	0.201305	8.89802	6.67861	0.918993	8.25036	7.97498	1.25499	8.56722	6.72251	1.03772	15395.8	10767.5	1041.06	16692.3	10910.8	833.63	14923.2	10984.1	331.67	14660.4	11003.7	1514.13	13593.3	13139.6	2067.72	14115.3	11076	1709.74
Q68FD5	Cltc	Clathrin heavy chain 1	52	5.94418	5.28825	4.80401	5.85427	5.496	5.94812	7.07025	6.67566	5.84473	5.92165	5.26393	4.623	5.76679	5.31784	4.64393	5.86184	5.10832	4.56724	7310.93	6504.18	5908.6	7200.34	6759.69	7315.77	8695.92	8210.59	7188.6	7283.22	6474.27	5685.97	7092.75	6540.57	5711.71	7209.65	6282.88	5617.38
A0A7N9VR94	Ahnak2	AHNAK nucleoprotein 2	50	9.80439	4.36629	2.08907	9.92408	3.67794	1.54559	8.77533	3.67862	0.896649	10.3213	5.06761	2.80233	10.1321	7.03264	3.55394	8.85136	4.87868	2.60211	10949.1	4876.06	2332.97	11082.7	4107.34	1726.04	9799.86	4108.1	1001.33	11526.3	5659.26	3129.5	11315	7853.71	3968.87	9884.77	5448.27	2905.91
A0A1L1SQ51	Tln2	Isoform of Q71LX4, Talin-2	50	7.76435	7.69405	1.49154	7.84927	7.93462	1.515	8.18815	8.52833	1.01975	7.5548	6.94123	1.7731	7.20763	7.128	1.98532	7.15981	6.51422	1.75083	7177.26	7112.27	1378.75	7255.76	7334.66	1400.45	7569.02	7883.47	942.642	6983.55	6416.38	1639.03	6662.64	6589.02	1835.2	6618.43	6021.65	1618.44
E9QAH1	Golgb1	Isoform of E9PVZ8, Golgi autoantigen, golgin subfamily b, macrogolgin 1	50	7.44865	5.57446	3.94771	7.56368	5.34972	3.4191	6.95375	4.93339	3.13895	7.70203	5.50744	4.40953	7.41528	5.47454	4.22477	7.42536	5.25964	4.25201	5153.85	3857.06	2731.49	5233.44	3701.57	2365.74	4811.42	3413.5	2171.89	5329.17	3810.69	3051.03	5130.76	3787.93	2923.19	5137.74	3639.24	2942.04
P07901	Hsp90aa1	Heat shock protein HSP 90-alpha	50	5.42426	4.86849	6.32529	5.47613	4.93701	6.08242	5.10631	4.62333	5.91616	5.68168	5.05011	6.30172	5.8478	5.25017	6.51016	5.59961	4.8704	6.12896	5775.27	5183.54	6734.61	5830.5	5256.5	6476.03	5436.74	4922.51	6299.01	6049.35	5376.91	6709.51	6226.22	5589.92	6931.45	5961.98	5185.58	6525.57
Q69ZN7	Myof	Myoferlin	50	7.39023	4.1667	4.17211	8.53623	4.30831	4.26938	8.45949	4.68896	4.26658	7.227	4.11242	4.43352	7.6938	5.40318	4.88362	7.44798	4.26197	4.27851	7899.7	4453.94	4459.73	9124.71	4605.32	4563.7	9042.68	5012.22	4560.71	7725.22	4395.93	4739.16	8224.2	5775.67	5220.29	7961.43	4555.79	4573.46
Q3U2G2	Hspa4	Isoform of Q61316, Heat shock 70 kDa protein 4	50	5.03884	5.27499	6.46393	5.00188	5.22049	6.2808	4.86409	4.88915	6.04028	4.9957	5.14357	6.86263	5.17557	5.25773	6.795	5.04847	4.97537	6.67151	4169.87	4365.29	5349.2	4139.29	4320.2	5197.65	4025.25	4045.99	4998.6	4134.17	4256.54	5679.14	4283.02	4351.01	5623.17	4177.84	4117.35	5520.98
P58252	Eef2	Elongation factor 2	50	5.55697	4.91654	5.79293	6.00929	5.0811	5.50801	5.76272	5.27331	5.71868	5.67857	4.80524	6.04548	5.92235	5.1475	6.38525	5.67654	4.74495	5.97458	5949.57	5263.89	6202.2	6433.85	5440.08	5897.15	6169.86	5645.87	6122.7	6079.76	5144.73	6472.59	6340.76	5511.17	6836.36	6077.59	5080.18	6396.68
P27773	Pdia3	Protein disulfide-isomerase A3	50	6.69566	5.06357	5.30382	6.49432	5.06285	4.80645	6.01187	4.56614	4.4423	6.78683	4.7944	5.14605	7.30588	5.22683	5.76295	6.90457	4.40784	5.21768	8887.94	6721.47	7040.39	8620.68	6720.52	6380.17	7980.27	6061.18	5896.79	9008.96	6364.17	6830.96	9697.96	6938.18	7649.85	9165.26	5851.04	6926.04
O35643	Ap1b1	AP-1 complex subunit beta-1	49	6.24094	5.162	5.60825	6.30976	5.21963	5.44523	6.95238	5.94262	6.49446	6.0871	5.13031	5.0603	5.60939	4.50476	4.91549	5.73644	4.63084	4.95011	6177.71	5109.71	5551.44	6245.84	5166.75	5390.06	6881.95	5882.42	6428.67	6025.44	5078.33	5009.04	5552.56	4459.13	4865.7	5678.32	4583.93	4899.96
Q8VHX6	Flnc	Filamin-C	48	4.10235	3.4569	4.8447	4.84373	3.97525	6.58627	4.58882	3.93927	5.50006	6.08712	5.75395	9.29984	5.38743	6.02217	7.75164	5.19872	5.63104	7.03076	5016.89	4227.55	5924.74	5923.55	4861.46	8054.55	5611.82	4817.46	6726.19	7444.13	7036.69	11373.1	6588.46	7364.7	9479.72	6357.67	6886.37	8598.14
P16546-2	Sptan1	Isoform of P16546, Isoform 2 of Spectrin alpha chain, non-erythrocytic 1	48	6.98654	6.8744	3.71002	6.81108	6.49065	3.60432	6.14847	6.36055	3.10121	6.92728	6.66931	3.9615	6.09422	6.73838	3.71001	6.10097	6.0769	3.63419	7370.34	7252.04	3913.83	7185.25	6847.21	3802.33	6486.23	6709.96	3271.58	7307.83	7035.69	4179.13	6429	7108.55	3913.82	6436.13	6410.73	3833.83
P68369	Tuba1a	Tubulin alpha-1A chain	48	5.59049	4.82699	5.62542	5.8484	5.46216	5.75607	5.7245	5.54057	6.00077	5.64996	4.80217	5.72067	6.09827	5.36764	5.31948	5.81849	5.23916	5.6088	4812.16	4154.96	4842.22	5034.16	4701.69	4954.68	4927.51	4769.19	5165.32	4863.35	4133.59	4924.21	5249.25	4620.33	4578.88	5008.41	4509.74	4827.92
P19324	Serpinh1	Serpin H1	48	6.33252	4.66968	5.16446	6.13509	5.14093	4.49523	5.99698	4.58463	4.10472	7.16988	5.35244	4.92191	8.24835	5.60348	5.57147	6.63308	4.75467	5.12047	5008.13	3693.05	4084.36	4851.98	4065.74	3555.09	4742.76	3625.79	3246.25	5670.36	4233.02	3892.53	6523.28	4431.56	4406.24	5245.83	3760.27	4049.56
P06151	Ldha	L-lactate dehydrogenase A chain	48	7.27742	4.17681	4.89486	7.80927	4.43415	4.45243	8.11745	4.93536	5.66261	6.91662	4.09299	4.77983	7.08901	4.11019	5.05534	7.14419	4.10949	4.94198	10000.3	5739.6	6726.31	10731.2	6093.23	6118.35	11154.7	6781.98	7781.32	9504.54	5624.42	6568.25	9741.43	5648.05	6946.84	9817.25	5647.09	6791.07
Q60932	Vdac1	Voltage-dependent anion-selective channel protein 1	47	4.43937	5.40533	6.6588	4.3925	5.72771	6.67939	4.21108	5.73124	6.90909	4.42327	5.77832	6.97928	4.40713	5.31827	6.61171	4.30686	5.2784	6.74223	3628.27	4417.75	5442.2	3589.97	4681.23	5459.03	3441.7	4684.11	5646.76	3615.12	4722.59	5704.12	3601.92	4346.59	5403.72	3519.97	4314.01	5510.39
Q5SWZ5	Mprip	Isoform of P97434, Myosin phosphatase Rho-interacting protein	47	7.22463	5.13646	4.39375	7.22476	5.17941	4.71007	7.2605	5.39833	3.86864	6.97009	5.04677	4.59045	6.64653	5.78765	4.44251	6.67853	5.02481	4.41611	6048.66	4300.38	3678.57	6048.77	4336.35	3943.4	6078.7	4519.64	3238.94	5835.56	4225.3	3843.26	5564.66	4845.58	3719.4	5591.45	4206.91	3697.29
Q9JHU4	Dync1h1	Cytoplasmic dynein 1 heavy chain 1	47	5.774	5.57629	5.84459	5.5908	5.32705	5.72931	5.13877	4.96023	5.01338	6.0053	5.75299	5.62561	5.82631	5.79673	5.4451	5.59972	5.54165	5.45218	6967.68	6729.1	7052.87	6746.6	6428.33	6913.75	6201.12	5985.67	6049.81	7246.79	6942.33	6788.62	7030.81	6995.11	6570.78	6757.37	6687.3	6579.33
Q8VDN2	Atp1a1	Sodium/potassium-transporting ATPase subunit alpha-1	47	6.60572	5.67687	5.13913	6.57809	5.84326	4.9704	6.48481	6.13327	4.72825	5.51828	4.98407	4.9819	5.32818	5.54386	4.98546	6.02385	5.24839	5.22619	8880.65	7631.93	6909	8843.52	7855.62	6682.15	8718.11	8245.5	6356.61	7418.71	6700.53	6697.62	7163.15	7453.11	6702.4	8098.4	7055.88	7026.03
Q80X90	Flnb	Filamin-B	47	6.80092	4.99275	4.2445	8.15761	5.84209	5.026	8.36385	7.1513	5.38514	6.08242	5.23831	4.64799	4.5939	4.68898	5.32554	4.70665	5.08128	3.67077	5761.02	4229.33	3595.49	6910.27	4948.8	4257.5	7084.97	6057.83	4561.72	5152.38	4437.34	3937.29	3891.47	3972.01	4511.24	3986.98	4304.33	3109.49
Q9WTQ5	Akap12	A-kinase anchor protein 12	47	2.30563	3.36201	10.3039	2.06374	2.93961	9.79882	1.53176	2.22533	7.39971	4.33395	4.27163	10.5904	4.38549	7.45228	11.0302	2.97157	3.60831	9.4256	1998.38	2913.98	8930.81	1788.72	2547.87	8493.01	1327.63	1928.78	6413.61	3756.4	3702.39	9179.06	3801.07	6459.17	9560.33	2575.57	3127.46	8169.53
P09103	P4hb	Protein disulfide-isomerase	47	5.89923	4.49145	5.45284	5.86884	4.52946	5.49624	6.68387	4.56489	5.86075	6.3952	4.48119	5.56298	7.29424	4.57071	6.47076	6.41114	4.31401	5.6522	8801.55	6701.16	8135.53	8756.2	6757.87	8200.29	9972.21	6810.73	8744.14	9541.53	6685.86	8299.87	10882.9	6819.42	9654.26	9565.3	6436.43	8432.99
Q8CIE6	Copa	Coatomer subunit alpha	47	6.26123	4.90775	5.49587	6.2907	4.90523	5.39099	6.4223	4.92201	4.93233	6.475	4.95843	5.24897	6.71466	4.95374	5.44989	6.46326	5.01259	5.19506	5618.48	4403.94	4931.69	5644.92	4401.68	4837.58	5763.01	4416.74	4426	5810.31	4449.42	4710.13	6025.36	4445.21	4890.43	5799.77	4498.02	4661.76
P27546	Map4	Microtubule-associated protein 4	46	7.1707	5.17759	4.59867	6.97654	4.99174	4.46164	6.21197	4.45454	3.8645	7.27153	5.3164	4.69354	7.14744	6.1765	4.23774	7.05399	5.22818	4.96678	7547.49	5449.66	4840.31	7343.14	5254.04	4696.08	6538.38	4688.61	4067.56	7653.62	5595.76	4940.17	7523.01	6501.05	4460.42	7424.65	5502.91	5227.76
Q64727	Vcl	Vinculin	46	6.70614	7.796	2.42108	6.45124	7.38044	2.36957	6.17905	7.44046	2.5037	6.77885	7.39856	2.74393	6.19325	8.76413	3.00364	6.08417	7.0897	2.69609	9098.97	10577.7	3284.96	8753.12	10013.9	3215.06	8383.81	10095.3	3397.05	9197.63	10038.5	3723	8403.08	11891.3	4075.38	8255.08	9619.4	3658.09
P09405	Ncl	Nucleolin	46	4.90273	5.40595	7.03926	5.23034	5.22017	6.30175	4.95099	5.35396	7.47546	4.66586	4.94423	6.09884	5.06007	5.38714	6.12515	4.65513	4.87744	6.30555	8229.19	9073.83	11815.3	8779.08	8762	10577.4	8310.2	8986.57	12547.5	7831.6	8298.84	10236.8	8493.29	9042.27	10281	7813.6	8186.74	10583.8
Q60847	Col12a1	Collagen alpha-1(XII) chain	46	2.33096	0.605698	10.9341	2.7557	0.444468	10.0876	1.77988	0.391013	8.57791	4.12496	0.878727	13.9477	5.1294	1.23485	20.8048	4.27032	1.03488	10.667	1710.3	444.419	8022.71	2021.94	326.12	7401.61	1305.95	286.898	6293.89	3026.62	644.749	10233.9	3763.6	906.046	15265.1	3133.27	759.326	7826.74
Q01853	Vcp	Transitional endoplasmic reticulum ATPase	46	5.83354	5.81818	5.05192	5.90932	6.24972	5.10817	6.41089	6.57314	5.47103	5.69903	5.71902	4.54355	5.67922	5.6121	4.68248	5.6103	5.46947	4.55892	4884.34	4871.48	4229.9	4947.79	5232.8	4277	5367.75	5503.59	4580.81	4771.72	4788.46	3804.25	4755.13	4698.93	3920.57	4697.42	4579.51	3817.12
P70398	Usp9x	Probable ubiquitin carboxyl-terminal hydrolase FAF-X	46	6.16788	5.79532	4.63116	6.22159	5.79452	4.63182	6.0166	5.67691	4.0367	6.23282	5.81083	4.96583	6.06432	5.91368	5.20668	6.12974	5.85151	4.8521	5028.51	4724.77	3775.67	5072.3	4724.12	3776.21	4905.18	4628.24	3291.02	5081.46	4737.42	4048.51	4944.08	4821.27	4244.87	4997.42	4770.59	3955.79
E9Q8K5	Ttn	Isoform of A2ASS6, Titin	45	1.12307	1.91708	1.89162	2.3179	3.82038	3.84961	1.37358	2.63886	2.45535	5.77256	13.7277	9.65319	3.65511	13.7413	5.88494	5.02546	13.5737	7.57852	728.505	1243.55	1227.04	1503.56	2478.17	2497.13	891.005	1711.75	1592.72	3744.5	8904.79	6261.75	2370.97	8913.62	3817.39	3259.87	8804.87	4915.97
P62259	Ywhae	14-3-3 protein epsilon	45	5.96435	5.57476	5.23424	6.42643	5.52128	5.08752	6.10566	5.64062	5.69043	6.01489	5.13365	4.81852	5.95152	5.51855	4.75125	6.35678	5.02902	5.18053	9736.39	9100.4	8544.54	10490.7	9013.11	8305.02	9967.06	9207.92	9289.24	9818.89	8380.32	7865.9	9715.44	9008.66	7756.09	10377	8209.52	8456.86
Q8BTM8	Flna	Filamin-A	45	4.57907	5.98472	4.15257	4.95498	6.63999	7.23889	6.32135	9.00505	6.44199	4.26647	6.80549	5.02861	3.33791	6.34735	5.6038	2.86077	6.84576	3.58522	4836.84	6321.62	4386.33	5233.91	7013.78	7646.39	6677.2	9511.97	6804.63	4506.64	7188.59	5311.69	3525.81	6704.66	5919.26	3021.82	7231.12	3787.04
Q6P5H2	Nes	Nestin	45	0.735576	1.21253	2.30239	1.53557	2.08794	4.58061	1.02065	1.41868	3.5105	4.81113	8.18221	15.7117	4.38699	11.7251	10.2903	4.33431	9.44126	12.7126	510.848	842.084	1598.98	1066.44	1450.05	3181.18	708.831	985.259	2438	3341.27	5682.45	10911.6	3046.71	8142.91	7146.5	3010.12	6556.84	8828.75
A0A1L1SQU7	Fat1	FAT atypical cadherin 1	45	9.54235	5.68949	2.80889	9.01366	5.7778	2.50555	8.12271	5.92867	1.83676	8.67254	4.12008	3.66339	7.33442	4.2503	4.61715	8.27223	4.30528	3.53871	5958.83	3552.87	1754.04	5628.68	3608.01	1564.62	5072.32	3702.23	1146.99	5415.67	2572.83	2287.65	4580.06	2654.15	2883.23	5165.69	2688.48	2209.79
P08249	Mdh2	Malate dehydrogenase, mitochondrial	45	3.10265	4.66567	7.65677	2.97702	4.68074	9.64452	4.23502	5.21346	10.7782	3.27639	4.49227	7.8566	3.2918	4.28942	7.78123	3.43723	4.35723	8.26377	3300.02	4962.47	8143.85	3166.4	4978.5	10258.1	4504.43	5545.11	11463.9	3484.82	4778.05	8356.4	3501.21	4562.28	8276.23	3655.88	4634.41	8789.46
Q61391	Mme	Neprilysin	45	7.28137	10.2071	1.0467	7.92147	11.4834	1.14919	8.35504	12.5022	1.04907	3.96126	7.45128	0.719621	3.61621	6.2457	0.821226	5.70178	9.50807	0.979309	6419.67	8999.15	922.834	6984.02	10124.4	1013.19	7366.28	11022.7	924.921	3492.47	6569.47	634.459	3188.25	5506.57	724.039	5027.02	8382.86	863.415
P06745	Gpi	Glucose-6-phosphate isomerase	45	5.73439	3.36671	6.80601	5.50658	3.2617	6.65519	5.25966	3.12901	6.35853	6.09445	3.68905	7.50728	6.29444	4.20442	8.01419	6.5656	3.81357	7.73922	8056.36	4729.96	9561.91	7736.31	4582.43	9350.02	7389.4	4396.02	8933.22	8562.21	5182.82	10547.1	8843.18	5906.87	11259.3	9224.15	5357.76	10873
Q60864	Stip1	Stress-induced-phosphoprotein 1	44	5.12721	4.65212	6.40963	4.87408	4.70784	6.59741	4.9006	4.62448	6.80871	5.4399	5.00816	6.70281	5.42561	5.43985	6.56892	5.34317	4.85281	6.51669	6964.04	6318.75	8705.89	6620.22	6394.43	8960.94	6656.24	6281.21	9247.93	7388.76	6802.34	9104.1	7369.34	7388.68	8922.24	7257.37	6591.34	8851.3
Q8VDJ3	Hdlbp	Vigilin	44	7.24984	5.10056	4.31722	7.06287	4.94947	4.02363	6.5913	4.45373	3.3575	7.76433	5.01323	4.47501	8.44723	5.37212	4.69576	7.73865	4.99459	4.39296	6926.65	4873.19	4124.77	6748.02	4728.83	3844.26	6297.47	4255.19	3207.83	7418.2	4789.74	4275.52	8070.66	5132.64	4486.43	7393.67	4771.94	4197.12
Q99K51	Pls3	Plastin-3	44	6.20832	4.6038	5.48287	6.11287	4.83579	5.35745	6.19138	4.9059	5.05179	6.7342	5.03449	5.34956	6.3603	5.70837	5.84081	6.18958	5.12763	4.9049	5890.23	4367.91	5201.94	5799.67	4588.02	5082.95	5874.15	4654.54	4792.95	6389.16	4776.54	5075.46	6034.42	5415.89	5541.54	5872.45	4864.91	4653.58
P19096	Fasn	Fatty acid synthase	44	2.79746	14.1858	3.38246	1.8674	12.9221	2.98235	2.35268	9.82927	3.32432	2.56166	14.7236	3.23776	2.37843	5.06388	3.29526	2.46956	9.68564	2.94042	2347.47	11903.9	2838.37	1567.02	10843.5	2502.62	1974.24	8248.17	2789.59	2149.6	12355.2	2716.94	1995.84	4249.32	2765.2	2072.32	8127.64	2467.43
F6ZDS4	Tpr	Nucleoprotein TPR	44	5.8059	5.45424	6.66439	5.69764	5.354	6.50041	5.49344	4.97369	6.11958	5.2974	5.07031	5.7152	5.37116	5.23053	5.50601	5.31525	4.77524	5.65562	3515.23	3302.31	4035.01	3449.69	3241.63	3935.73	3326.05	3011.36	3705.15	3207.36	3069.86	3460.32	3252.01	3166.87	3333.66	3218.17	2891.21	3424.24
Q61768	Kif5b	Kinesin-1 heavy chain	44	5.35588	4.15422	5.26048	5.22008	4.2262	5.94988	5.43861	4.29094	5.40745	6.11732	5.06356	6.86754	6.25311	6.00162	6.3642	6.11535	5.39658	6.51698	4917.38	3814.1	4829.79	4792.69	3880.19	5462.74	4993.33	3939.62	4964.73	5616.47	4648.99	6305.27	5741.14	5510.24	5843.14	5614.66	4954.75	5983.41
E9PWE8	Dpysl3	Isoform of Q62188, Dihydropyrimidinase-related protein 3	44	4.52016	3.87434	8.6854	4.09468	3.66482	9.21213	4.71117	4.12288	9.48433	4.59905	3.62207	8.23518	4.34437	3.33139	7.89781	4.17879	3.45048	7.97095	5202.94	4459.56	9997.35	4713.19	4218.39	10603.6	5422.8	4745.65	10917	5293.75	4169.19	9479.12	5000.59	3834.6	9090.78	4810.01	3971.68	9174.98
O55143	Atp2a2	Sarcoplasmic/endoplasmic reticulum calcium ATPase 2	44	4.24637	4.38077	6.04496	4.45651	4.99091	6.66229	4.57112	4.90929	6.66845	5.5045	6.40413	5.85749	5.18108	6.37403	5.6549	5.3341	6.71529	6.04381	2470.33	2548.52	3516.67	2592.58	2903.47	3875.8	2659.25	2855.99	3879.38	3202.25	3725.61	3407.6	3014.1	3708.1	3289.75	3103.12	3906.63	3516
E9Q586	Dctn1	Isoform of O08788, Dynactin subunit 1	44	5.8612	5.61502	5.69046	5.72097	5.48775	5.75231	5.76622	5.72458	5.6862	5.52629	5.20566	5.31858	5.5116	5.48594	5.24349	5.76629	5.18432	5.45311	3510.07	3362.64	3407.81	3426.08	3286.42	3444.86	3453.18	3428.25	3405.26	3309.5	3117.48	3185.11	3300.7	3285.34	3140.14	3453.23	3104.71	3265.67
Q7TPR4	Actn1	Alpha-actinin-1	44	6.84831	5.32475	4.08144	7.22617	5.5487	4.59574	7.15169	6.29997	4.04084	6.02707	5.03712	4.8775	5.82682	5.7762	6.02059	5.95087	5.35931	4.00689	5616.45	4366.95	3347.28	5926.35	4550.61	3769.07	5865.26	5166.75	3313.98	4942.93	4131.06	4000.15	4778.7	4737.19	4937.62	4880.44	4395.29	3286.14
Q9QUR6	Prep	Prolyl endopeptidase	44	4.69578	4.78384	6.12039	4.34521	4.67028	7.36533	5.33056	5.56105	7.49838	4.94629	4.90901	6.70833	4.97148	5.19562	6.34259	4.79179	5.00445	6.75961	3942.74	4016.68	5138.9	3648.39	3921.33	6184.19	4475.73	4669.26	6295.91	4153.08	4121.78	5632.55	4174.23	4362.43	5325.46	4023.36	4201.91	5675.61
Q3TML0	Pdia6	Isoform of Q922R8, Protein disulfide-isomerase A6	44	6.89992	5.61044	4.84445	6.87587	5.70248	4.16158	6.50497	5.30332	3.87878	6.32606	5.30629	4.70843	6.5512	5.32433	5.32799	6.67216	4.95998	5.04173	4068.33	3308.03	2856.38	4054.14	3362.29	2453.75	3835.46	3126.94	2287	3729.97	3128.69	2776.18	3862.71	3139.33	3141.49	3934.04	2924.5	2972.7
Q9WTI7-3	Myo1c	Isoform of Q9WTI7, Isoform 3 of Unconventional myosin-Ic	44	7.42753	6.29063	3.30081	7.6223	6.14036	3.01212	7.44176	6.4508	2.96164	7.5791	5.7835	3.16163	7.09012	6.24499	3.63562	7.03406	5.69653	3.1265	5211.46	4413.76	2315.98	5348.11	4308.32	2113.42	5221.44	4526.14	2078.01	5317.8	4057.93	2218.33	4974.71	4381.74	2550.9	4935.38	3996.91	2193.68
P04117	Fabp4	Fatty acid-binding protein, adipocyte	44	1.11793	18.6966	1.8084	0.555257	16.6288	2.1288	0.669848	18.3898	2.9113	0.611389	14.128	1.37554	0.731638	5.30563	1.1593	0.863921	11.2993	1.61857	777.302	12999.8	1257.39	386.074	11562.1	1480.17	465.749	12786.6	2024.24	425.102	9823.3	956.422	508.712	3689.03	806.069	600.689	7856.46	1125.4
P10107	Anxa1	Annexin A1	43	6.77906	5.19228	3.34376	6.6062	5.29994	3.75026	7.86665	5.92808	3.34933	7.07131	5.81888	3.6073	7.14913	7.57749	4.19852	7.09559	5.9707	3.39551	5179.25	3966.94	2554.66	5047.19	4049.2	2865.23	6010.18	4529.1	2558.91	5402.53	4445.67	2756	5461.99	5789.26	3207.7	5421.08	4561.66	2594.19
A2AGT5	Ckap5	Cytoskeleton-associated protein 5	43	6.8077	5.3517	4.71104	7.06401	5.42667	4.62393	6.55447	5.30987	4.4272	6.50549	5.43335	4.58874	6.5991	5.47953	4.29608	6.81156	5.30846	4.70107	5365.82	4218.21	3713.24	5567.85	4277.3	3644.58	5166.23	4185.24	3489.52	5127.62	4282.56	3616.84	5201.41	4318.97	3386.17	5368.87	4184.13	3705.38
Q05D44	Eif5b	Eukaryotic translation initiation factor 5B	43	5.90594	5.66969	5.41498	5.80191	5.49283	5.24191	5.39994	5.22205	4.60705	5.87466	5.49042	5.43389	6.10869	5.91117	5.58182	5.79032	5.42127	5.63146	4675.36	4488.33	4286.69	4593	4348.32	4149.68	4274.79	4133.96	3647.1	4650.59	4346.41	4301.66	4835.86	4679.5	4418.77	4583.83	4291.67	4458.07
Q6P4T2	Snrnp200	U5 small nuclear ribonucleoprotein 200 kDa helicase	43	5.77079	6.53118	5.34252	5.76314	6.35731	5.44042	5.55083	6.15776	4.77062	5.46005	6.34114	4.78038	5.77201	5.6503	4.21739	5.51323	5.72711	4.85385	3223.92	3648.73	2984.66	3219.65	3551.59	3039.36	3101.04	3440.11	2665.17	3050.32	3542.56	2670.62	3224.61	3156.61	2356.1	3080.03	3199.52	2711.67
Q8CGC7	Eprs1	Bifunctional glutamate/proline--tRNA ligase	43	5.09142	5.29893	5.37894	5.08353	5.2636	6.01926	5.36935	5.48908	5.89725	5.6048	5.74606	5.96674	5.90406	5.45919	6.00795	5.41471	5.45271	5.55242	5160.65	5370.98	5452.07	5152.65	5335.16	6101.11	5442.36	5563.71	5977.44	5681.01	5824.18	6047.87	5984.34	5533.42	6089.64	5488.33	5526.85	5627.92
Q5SX40	Myh1	Myosin-1	43	0.909004	1.88478	2.89916	1.97053	3.98465	5.76727	1.25894	2.56786	4.60968	4.29352	10.1114	11.3363	3.47876	10.6818	7.54729	4.23882	11.8883	10.5719	571.497	1184.98	1822.73	1238.89	2505.18	3625.92	791.503	1614.43	2898.14	2699.37	6357.12	7127.22	2187.12	6715.7	4745.03	2664.98	7474.28	6646.62
A0A571BF58	Neb	Nebulin	43	1.44645	1.96112	1.91938	2.92054	3.51294	3.40827	1.81209	2.3727	2.37973	7.00897	11.5965	9.86772	5.6201	12.5882	6.0733	6.59863	11.3903	7.52309	722.72	979.873	959.021	1459.25	1755.24	1702.95	905.412	1185.52	1189.04	3502.04	5794.19	4930.41	2808.08	6289.68	3034.53	3297.01	5691.19	3758.92
P20029	Hspa5	Endoplasmic reticulum chaperone BiP	43	5.6456	5.30045	5.44858	5.53513	5.45658	5.1033	5.54193	4.86511	5.37793	6.02205	5.61916	5.51076	6.51384	5.26707	6.24576	5.78234	5.31231	5.45209	5897.39	5536.85	5691.59	5782	5699.94	5330.91	5789.1	5082.09	5617.79	6290.64	5869.78	5756.54	6804.36	5501.98	6524.32	6040.24	5549.24	5695.25
P42932	Cct8	T-complex protein 1 subunit theta	43	5.2152	5.10584	6.03344	5.35248	5.22678	6.2224	5.23423	5.31601	6.08222	5.29602	5.13296	6.06272	5.49803	5.56909	6.10276	5.34955	5.13636	6.06393	5306.81	5195.54	6139.43	5446.51	5318.6	6331.71	5326.18	5409.4	6189.06	5389.06	5223.13	6169.23	5594.61	5666.92	6209.97	5443.53	5226.59	6170.46
P26443	Glud1	Glutamate dehydrogenase 1, mitochondrial	43	4.80842	7.41774	6.04492	4.54874	6.8463	5.70224	4.50082	6.41396	5.50639	4.33212	6.47669	5.60293	4.26835	5.47793	5.74048	4.58436	5.82606	5.90154	3718.07	5735.71	4674.19	3517.28	5293.85	4409.21	3480.23	4959.55	4257.78	3349.78	5008.05	4332.42	3300.47	4235.77	4438.78	3544.82	4504.95	4563.32
E9Q3X0	Mvp	Isoform of Q9EQK5, Major vault protein	43	6.9627	5.22587	5.10856	6.80845	5.25146	4.82783	6.44013	5.23587	4.26704	6.10416	4.85069	5.45396	6.18274	5.17693	5.88736	6.17705	4.78495	5.25425	3581.42	2688.04	2627.7	3502.08	2701.21	2483.3	3312.62	2693.19	2194.85	3139.81	2495.06	2805.37	3180.23	2662.87	3028.29	3177.3	2461.25	2702.64
P08003	Pdia4	Protein disulfide-isomerase A4	43	5.67668	5.50919	6.92795	5.30783	5.23997	6.406	5.15793	4.88686	6.54712	5.15631	4.86204	5.97366	5.60273	4.44053	6.11345	5.43118	4.48403	6.27653	7310.93	7095.21	8922.42	6835.88	6748.49	8250.21	6642.83	6293.73	8431.95	6640.74	6261.75	7693.39	7215.68	5718.9	7873.43	6994.74	5774.93	8083.47
Q91YQ5	Rpn1	Dolichyl-diphosphooligosaccharide--protein glycosyltransferase subunit 1	43	5.99655	5.09054	5.80174	5.9715	5.01516	5.44821	5.59212	4.66344	4.98968	5.99039	4.97685	5.81714	6.23895	5.11538	6.35465	6.18063	4.8138	5.94329	5686.86	4827.64	5502.12	5663.1	4756.15	5166.84	5303.31	4422.6	4731.99	5681.02	4719.82	5516.72	5916.74	4851.2	6026.47	5861.43	4565.19	5636.36
P40142	Tkt	Transketolase	43	5.2996	8.19079	4.6832	4.84701	7.65847	4.75676	5.47536	7.74664	4.61141	4.93332	6.36829	4.27078	5.1477	6.12163	4.46791	5.02824	5.93665	4.45625	6334.29	9789.96	5597.55	5793.34	9153.71	5685.47	6544.36	9259.09	5511.74	5896.5	7611.64	5104.6	6152.74	7316.81	5340.22	6009.95	7095.73	5326.29
Q9QXS1	Plec	Plectin	42	8.03336	6.85542	2.00722	8.27824	6.63818	1.81901	7.57001	6.62703	1.4427	7.16674	7.24323	2.80222	6.90436	7.46486	2.59005	6.97945	6.88626	2.69166	6438.4	5494.33	1608.7	6634.66	5320.22	1457.86	6067.04	5311.28	1156.26	5743.84	5805.14	2245.86	5533.55	5982.76	2075.81	5593.73	5519.05	2157.25
A0A286YCV9	Kif13b	Kinesin family member 13B	42	4.35379	4.65717	10.4949	4.20166	4.46126	10.9047	4.08032	4.71901	11.2959	3.75617	3.57603	6.1202	3.38144	3.48417	4.66671	3.83941	3.9374	8.06971	2726.79	2916.8	6573.01	2631.51	2794.1	6829.65	2555.52	2955.53	7074.64	2352.5	2239.68	3833.1	2117.8	2182.15	2922.77	2404.64	2466	5054.08
P58871	Tnks1bp1	182 kDa tankyrase-1-binding protein	42	8.45574	5.38646	3.78811	8.15292	4.98073	3.53257	7.94724	4.89935	3.18149	8.03502	4.977	3.72732	7.64963	5.5081	3.41798	7.88755	4.77687	3.69593	3734.28	2378.8	1672.93	3600.55	2199.63	1560.08	3509.71	2163.69	1405.03	3548.48	2197.98	1646.08	3378.28	2432.52	1509.47	3483.35	2109.59	1632.22
P48678	Lmna	Prelamin-A/C	42	7.68147	7.33468	3.26148	7.14504	7.12198	3.21666	7.22986	7.03419	3.04667	6.8367	6.59535	3.02877	6.32617	6.27407	2.75701	6.10507	5.93947	3.06534	4739.43	4525.46	2012.32	4408.45	4394.23	1984.66	4460.79	4340.06	1879.78	4218.21	4069.3	1868.74	3903.22	3871.07	1701.06	3766.79	3664.62	1891.3
E9Q6R7	Utrn	Utrophin	42	7.26545	7.74024	2.48336	7.32614	7.31965	2.28965	6.73268	6.93804	1.783	6.73517	7.58535	2.97707	6.10164	7.09911	2.90333	6.5125	7.26475	2.94288	5358.17	5708.32	1831.45	5402.93	5398.15	1688.59	4965.26	5116.71	1314.94	4967.1	5594.09	2195.55	4499.88	5235.5	2141.17	4802.89	5357.65	2170.34
Q61553	Fscn1	Fascin	42	5.19587	5.12848	7.02247	5.41689	5.35027	7.04456	5.38561	5.72292	7.02909	4.64549	4.47168	5.86916	4.6763	5.56766	5.36498	4.99032	5.10184	6.01641	4070.28	4017.49	5501.17	4243.42	4191.23	5518.48	4218.92	4483.15	5506.36	3639.13	3502.97	4597.71	3663.26	4361.52	4202.75	3909.26	3996.62	4713.06
O08539	Bin1	Myc box-dependent-interacting protein 1	42	2.79901	2.78094	2.99799	3.24781	3.95298	4.23631	2.86245	3.29129	3.4008	5.77795	8.96138	10.0812	5.06742	9.58476	7.47802	5.49665	9.1318	8.85121	1835.71	1823.86	1966.21	2130.05	2592.53	2778.35	1877.32	2158.56	2230.39	3789.42	5877.25	6611.69	3323.43	6286.08	4904.4	3604.93	5989.02	5805
Q9ERU9	Ranbp2	E3 SUMO-protein ligase RanBP2	42	5.67643	5.56073	5.66665	5.99156	5.69131	5.86299	6.2663	5.96274	5.89655	5.49026	5.66481	4.95214	5.39124	5.51419	4.80319	5.22783	5.41164	4.96941	4080.26	3997.1	4073.23	4306.78	4090.96	4214.36	4504.27	4286.06	4238.48	3946.44	4071.91	3559.63	3875.27	3963.65	3452.57	3757.81	3889.93	3572.05
Q8BMS1	Hadha	Trifunctional enzyme subunit alpha, mitochondrial	42	5.05415	6.78603	5.76757	4.85378	6.76932	5.57438	5.00092	6.28742	5.79866	4.56339	6.30156	5.74351	4.3895	5.27587	5.5254	4.80165	6.00096	5.50592	4136.04	5553.32	4719.86	3972.06	5539.64	4561.76	4092.48	5145.28	4745.3	3734.43	5156.85	4700.17	3592.12	4317.48	4521.68	3929.41	4910.85	4505.74
Q6ZQ38	Cand1	Cullin-associated NEDD8-dissociated protein 1	42	5.96099	5.76416	5.37571	5.99891	5.80464	5.58905	6.19774	5.91738	5.36187	5.66647	5.15211	5.09236	5.83082	5.27513	5.08373	5.83227	4.9472	5.14945	7007.29	6775.92	6319.28	7051.87	6823.49	6570.06	7285.59	6956.02	6303.01	6661.07	6056.43	5986.2	6854.27	6201.04	5976.05	6855.98	5815.55	6053.31
P14824	Anxa6	Annexin A6	42	4.70379	5.25129	6.32873	4.49728	5.00171	7.02245	4.57095	5.09569	6.62281	4.70148	4.83366	7.46294	4.44555	4.7143	8.57166	4.6376	4.53144	7.00667	5929.04	6619.15	7977.24	5668.73	6304.55	8851.66	5761.59	6423.01	8347.92	5926.12	6092.74	9406.88	5603.53	5942.27	10804.4	5845.6	5711.79	8831.77
Q60597	Ogdh	2-oxoglutarate dehydrogenase, mitochondrial	42	3.54209	5.21385	7.95462	3.21825	4.59468	8.90317	3.0939	4.00378	7.22636	3.72287	5.23999	9.47104	3.48599	4.43213	8.67114	3.57735	4.93349	8.71532	2896.14	4263.03	6503.98	2631.36	3756.78	7279.55	2529.69	3273.64	5908.53	3043.95	4284.4	7743.87	2850.27	3623.87	7089.84	2924.97	4033.8	7125.96
Q8BUR4	Dock1	Dedicator of cytokinesis protein 1	42	6.02919	5.43446	5.7903	5.77538	5.19815	5.67167	5.71781	5.13176	5.42304	6.00192	5.49155	4.84315	6.17136	6.26476	4.60241	6.05623	5.32359	5.07327	4439.29	4001.39	4263.39	4252.41	3827.39	4176.05	4210.02	3778.51	3992.98	4419.21	4043.42	3566.01	4543.97	4612.74	3388.75	4459.19	3919.76	3735.45
Q03265	Atp5f1a	ATP synthase subunit alpha, mitochondrial	42	4.42522	6.24321	6.73913	4.18432	6.21099	6.39219	3.99535	5.27214	6.46996	3.9934	6.31797	6.63226	4.04456	5.34514	6.63941	4.28323	6.18533	6.62618	2871.55	4051.25	4373.05	2715.22	4030.34	4147.92	2592.6	3421.12	4198.39	2591.34	4099.76	4303.7	2624.53	3468.49	4308.35	2779.41	4013.69	4299.76
Q64133	Maoa	Amine oxidase [flavin-containing] A	42	2.86318	6.5407	7.64128	2.84632	6.48334	7.91218	2.84157	7.04748	7.64412	2.60596	5.63666	6.87482	2.5193	8.03862	7.44565	2.74378	5.35766	6.95738	2867.92	6551.53	7653.94	2851.03	6494.08	7925.28	2846.27	7059.16	7656.78	2610.27	5645.99	6886.21	2523.47	8051.94	7457.98	2748.33	5366.53	6968.91
Q9WU78	Pdcd6ip	Programmed cell death 6-interacting protein	42	7.49146	4.17637	3.87268	7.80296	4.43024	4.18525	9.47576	5.31211	4.10704	7.48424	4.38549	4.40168	7.11433	4.76819	4.77228	7.65449	4.38226	4.18316	5712.92	3184.86	2953.27	5950.46	3378.46	3191.63	7226.13	4050.97	3131.99	5707.42	3344.33	3356.68	5425.32	3636.18	3639.3	5837.24	3341.87	3190.04
Q9JIF7	Copb1	Coatomer subunit beta	41	6.25465	4.69799	5.53665	6.16076	4.79779	5.6682	6.18261	4.94088	5.1127	6.15739	4.88956	5.62152	6.87496	4.79437	5.64466	6.48048	4.81937	5.36547	5616.09	4218.35	4971.39	5531.78	4307.96	5089.5	5551.4	4436.44	4590.72	5528.75	4390.36	5047.59	6173.06	4304.89	5068.37	5818.86	4327.34	4817.68
Q91ZX7	Lrp1	Prolow-density lipoprotein receptor-related protein 1	41	5.62161	4.21474	7.02448	5.38471	4.19885	6.42024	4.99516	3.85042	6.55128	6.34133	4.56356	6.76241	6.13745	4.70058	6.4341	5.66025	4.36846	6.77036	4375.75	3280.67	5467.72	4191.35	3268.3	4997.39	3888.14	2997.09	5099.39	4935.97	3552.19	5263.73	4777.27	3658.84	5008.18	4405.83	3400.33	5269.92
P51881	Slc25a5	ADP/ATP translocase 2	41	3.45963	6.59144	7.08333	3.38245	6.55945	7.57057	3.73349	6.17607	6.88181	3.35788	6.4587	6.71706	3.57925	5.26935	6.60409	3.59218	5.9566	7.02663	1940.04	3696.24	3972.08	1896.76	3678.31	4245.31	2093.61	3463.32	3859.07	1882.98	3621.81	3766.69	2007.12	2954.87	3703.34	2014.37	3340.25	3940.28
Q99KC8	Vwa5a	von Willebrand factor A domain-containing protein 5A	41	7.92849	5.38464	3.47105	8.04734	5.74239	3.74181	9.26781	6.5327	3.91442	7.26797	5.00983	2.99471	6.92933	5.28127	3.25037	7.12721	4.84717	3.2615	10290.7	6988.95	4505.22	10445	7453.3	4856.66	12029.1	8479.07	5080.69	9433.41	6502.48	3886.96	8993.88	6854.79	4218.8	9250.71	6291.35	4233.24
E9Q1G8	Septin7	Isoform of O55131, Septin	41	7.37177	5.37049	4.41052	7.31685	5.57281	4.1128	6.97834	5.43858	3.98605	7.14876	5.39692	4.15174	6.78861	5.56215	4.07821	6.77257	5.21531	4.32752	3686.59	2685.77	2205.69	3659.13	2786.94	2056.8	3489.84	2719.82	1993.41	3575.07	2698.98	2076.27	3394.96	2781.61	2039.5	3386.94	2608.16	2164.18
Q9Z0R4	Itsn1	Intersectin-1	41	7.12115	7.53973	4.2073	6.58158	7.71551	4.21551	6.64619	7.8092	4.08666	5.6737	6.10296	3.51274	5.14406	5.18794	3.49202	5.59878	5.56176	3.80321	5002.75	5296.81	2955.71	4623.69	5420.3	2961.48	4669.08	5486.12	2870.96	3985.89	4287.45	2467.77	3613.81	3644.63	2453.21	3933.25	3907.25	2671.83
Q99KI0	Aco2	Aconitate hydratase, mitochondrial	41	3.52112	5.96358	6.81337	3.42583	6.12656	7.87494	4.43244	6.44669	8.48905	3.46908	5.81347	6.88176	3.36473	4.54638	6.82267	3.61987	5.56759	6.82087	3039.34	5147.61	5881.13	2957.09	5288.29	6797.45	3825.97	5564.62	7327.53	2994.42	5018.05	5940.17	2904.35	3924.32	5889.16	3124.58	4805.8	5887.6
P35441	Thbs1	Thrombospondin-1	41	9.43391	1.1266	1.72453	10.0072	1.07403	1.69314	8.21893	1.11304	0.376542	11.7228	1.38674	4.92352	14.9797	2.18128	7.58445	15.1551	2.14815	5.15029	10093.5	1205.36	1845.09	10706.8	1149.12	1811.52	8793.55	1190.86	402.867	12542.4	1483.69	5267.74	16027	2333.78	8114.71	16214.7	2298.34	5510.37
Q8R1A4	Dock7	Dedicator of cytokinesis protein 7	41	7.61832	4.58018	5.01449	8.00068	4.68193	4.60679	7.73613	4.67202	4.33656	6.97719	4.38729	4.64322	6.78572	4.7037	4.86093	7.06265	4.56303	4.76917	4455.59	2678.72	2932.73	4679.21	2738.23	2694.29	4524.49	2732.44	2536.24	4080.62	2565.91	2715.59	3968.64	2750.97	2842.92	4130.6	2668.69	2789.25
P37040	Por	NADPH--cytochrome P450 reductase	41	1.4536	2.63527	13.7722	1.30531	2.11585	13.1289	1.63366	1.81928	13.0065	1.68949	2.63111	12.3091	1.83668	1.75284	12.8128	1.67342	2.39668	12.0273	1267.05	2297.08	12004.7	1137.79	1844.32	11444.1	1424.01	1585.8	11337.3	1472.67	2293.45	10729.5	1600.97	1527.89	11168.5	1458.66	2089.11	10483.8
Q9D8E6	Rpl4	60S ribosomal protein L4	41	5.70175	5.44747	5.07359	6.39438	5.64754	4.56719	6.15573	6.14838	6.09555	6.0247	5.89891	5.00089	5.90857	5.45838	5.01828	5.68553	5.25572	4.51744	7506.15	7171.41	6679.21	8417.98	7434.79	6012.55	8103.8	8094.13	8024.58	7931.31	7765.71	6583.51	7778.43	7185.77	6606.4	7484.8	6918.97	5947.06
P18760	Cfl1	Cofilin-1	41	4.9321	4.72614	6.82967	4.55918	4.55555	7.41015	5.47838	5.38197	7.15655	5.11175	4.51989	6.29753	5.13883	5.28506	6.33743	5.14349	4.62321	6.51311	4795.68	4595.42	6640.77	4433.08	4429.55	7205.19	5326.85	5233.11	6958.61	4970.37	4394.88	6123.34	4996.69	5138.88	6162.15	5001.23	4495.34	6332.97
O88342	Wdr1	WD repeat-containing protein 1	41	5.32429	5.71544	5.57436	5.09324	6.00608	5.84187	5.66204	6.22564	5.59112	5.01098	5.20781	5.77357	5.10755	5.86147	6.05135	5.07788	5.36297	5.51233	4507.83	4839	4719.55	4312.21	5085.07	4946.04	4793.79	5270.95	4733.74	4242.56	4409.21	4888.22	4324.32	4962.63	5123.39	4299.2	4540.58	4667.03
P62806	H4f16	Histone H4	41	6.15611	6.67632	4.64943	5.79934	6.37419	4.97047	6.95485	7.05517	5.59337	6.72351	6.60718	3.55219	5.65297	5.27072	3.30741	5.43055	5.40356	3.82267	7151.94	7756.3	5401.53	6737.45	7405.29	5774.5	8079.88	8196.42	6498.16	7811.12	7675.97	4126.8	6567.4	6123.32	3842.43	6309	6277.65	4441.03
F8WIV2	Serpinb6a	Isoform of Q60854, Serine (or cysteine) peptidase inhibitor, clade B, member 6a	41	5.07094	4.13796	6.53343	5.31417	4.5044	7.25481	5.13983	4.2252	7.36521	5.62394	4.80366	6.54527	5.30925	5.25685	5.85601	5.30634	4.72539	7.02733	5163.41	4213.41	6652.56	5411.07	4586.53	7387.09	5233.54	4302.24	7499.5	5726.49	4891.25	6664.61	5406.06	5352.7	5962.78	5403.09	4811.55	7155.46
Q5SWU9	Acaca	Acetyl-CoA carboxylase 1	40	3.2254	12.0249	4.79994	2.60714	10.9965	4.13966	2.86329	8.06328	4.09013	2.92882	11.722	4.22254	2.9916	4.76227	4.87637	2.91965	8.71124	4.05527	1406.96	5245.4	2093.79	1137.27	4796.8	1805.77	1249	3517.3	1784.16	1277.59	5113.3	1841.92	1304.97	2077.36	2127.13	1273.59	3799.95	1768.96
Q6PB66	Lrpprc	Leucine-rich PPR motif-containing protein, mitochondrial	40	3.71206	6.71705	6.49313	3.29266	6.43289	6.68533	3.54522	5.95281	6.3836	3.5958	6.71713	7.30204	3.58397	5.79519	6.90651	3.76522	6.44927	6.67009	3110.37	5628.29	5440.66	2758.96	5390.18	5601.71	2970.58	4987.92	5348.88	3012.96	5628.35	6118.46	3003.05	4855.85	5787.03	3154.92	5403.91	5588.94
P63038	Hspd1	60 kDa heat shock protein, mitochondrial	40	3.83722	6.93041	7.19522	3.64261	6.69812	6.7947	3.56375	5.77832	6.83607	3.49482	6.20857	6.78802	3.67833	5.35056	6.83241	3.69226	5.75201	6.92658	4811.56	8690.15	9022.21	4567.53	8398.88	8519.99	4468.65	7245.53	8571.86	4382.21	7785.02	8511.62	4612.33	6709.16	8567.28	4629.79	7212.55	8685.36
P01027	C3	Complement C3	40	7.94174	7.25148	1.85846	7.22361	7.05281	2.78622	6.28993	6.82476	1.51863	7.30875	8.38441	2.43977	7.29947	5.59625	2.41147	7.77816	6.5442	3.48988	4197.25	3832.44	982.203	3817.71	3727.44	1472.53	3324.26	3606.92	802.602	3862.7	4431.2	1289.43	3857.8	2957.64	1274.47	4110.79	3458.64	1844.42
O08529	Capn2	Calpain-2 catalytic subunit	40	6.01138	5.58819	4.92913	5.73705	5.94104	5.46952	6.78912	6.95814	5.95774	5.70591	5.27992	4.87794	5.57455	5.14901	5.3079	5.4	4.85217	4.47129	3359.24	3122.75	2754.46	3205.94	3319.93	3056.44	3793.84	3888.3	3329.26	3188.53	2950.49	2725.85	3115.13	2877.33	2966.12	3017.59	2711.45	2498.62
P48036	Anxa5	Annexin A5	40	6.30494	4.73028	6.1421	5.99945	4.5691	5.87322	6.3042	4.44932	5.95304	5.91056	3.74227	6.54753	5.98323	4.3074	6.91458	5.89963	3.8396	6.52954	10292.4	7721.86	10026.5	9793.68	7458.73	9587.62	10291.2	7263.2	9717.92	9648.58	6109	10688.4	9767.2	7031.53	11287.6	9630.74	6267.87	10659
E9Q7G0	Numa1	Nuclear mitotic apparatus protein 1	40	7.63971	7.99075	2.49873	7.80999	7.83467	2.45806	7.44898	7.78206	2.25899	6.79081	7.03943	2.01698	6.26912	6.94375	1.80684	6.40795	6.78222	2.22097	5631.31	5890.07	1841.84	5756.83	5775.02	1811.86	5490.73	5736.24	1665.12	5005.58	5188.84	1486.74	4621.04	5118.31	1331.84	4723.37	4999.25	1637.1
Q8K411	Pitrm1	Presequence protease, mitochondrial	40	3.60863	4.90564	7.58791	3.78419	5.11483	7.70054	4.23312	5.29654	8.09044	3.56581	4.62646	7.93653	3.6355	4.76163	8.67641	3.68583	4.72823	8.06175	2462.83	3348.02	5178.63	2582.65	3490.79	5255.5	2889.04	3614.8	5521.6	2433.61	3157.48	5416.56	2481.17	3249.74	5921.51	2515.52	3226.94	5502.02
P13020	Gsn	Gelsolin	40	6.04596	6.19432	4.31619	5.4107	5.51981	4.46766	5.67641	5.5148	4.38261	6.29346	6.45406	4.98568	6.05923	6.6628	5.51261	5.80819	5.87828	4.81724	3334.14	3415.96	2380.23	2983.82	3043.99	2463.77	3130.35	3041.23	2416.86	3470.63	3559.2	2749.44	3341.46	3674.31	3040.02	3203.02	3241.67	2656.55
P17742	Ppia	Peptidyl-prolyl cis-trans isomerase A	40	6.16565	6.01341	4.2112	6.31923	5.47861	5.24182	6.93774	6.53243	5.59054	5.83225	4.86042	4.08276	6.11658	6.09003	4.19106	6.0239	5.20883	5.10354	6121.52	5970.38	4181.07	6274	5439.4	5204.3	6888.08	6485.68	5550.53	5790.51	4825.63	4053.54	6072.8	6046.44	4161.06	5980.78	5171.55	5067.02
Q9ET01	Pygl	Glycogen phosphorylase, liver form	40	9.52764	6.02806	2.54056	10.4043	6.20679	2.41686	9.59607	6.62576	2.42516	7.40795	4.75255	2.41127	7.44824	4.10055	2.78129	7.91498	4.73328	2.67868	6451.68	4081.93	1720.35	7045.33	4202.95	1636.59	6498.02	4486.67	1642.21	5016.32	3218.21	1632.8	5043.61	2776.71	1883.36	5359.66	3205.16	1813.88
Q99P72	Rtn4	Reticulon-4	40	4.59554	3.32298	6.64842	4.68344	3.58061	6.98469	4.01486	3.44425	6.4184	5.03486	5.54084	8.69599	4.93411	5.89115	7.23802	5.21936	5.22615	8.52631	3923.44	2836.99	5676.08	3998.48	3056.94	5963.17	3427.68	2940.53	5479.7	4298.51	4730.49	7424.19	4212.49	5029.56	6179.45	4456.02	4461.82	7279.33
P17751	Tpi1	Triosephosphate isomerase	40	5.99164	4.07503	4.63449	6.07005	4.28236	6.56851	8.46428	5.20945	7.54828	6.02393	3.95692	5.09133	6.21611	4.4594	5.10031	6.55152	4.00232	5.75406	6753.5	4593.19	5223.78	6841.88	4826.88	7403.71	9540.54	5871.85	8508.07	6789.9	4460.06	5738.71	7006.51	5026.43	5748.83	7384.56	4511.23	6485.7
P70296	Pebp1	Phosphatidylethanolamine-binding protein 1	40	3.91572	3.97826	5.46685	4.51324	5.22089	9.32001	7.29121	7.75015	10.9641	4.02375	3.94597	5.60705	4.10613	4.15856	5.68129	4.29632	4.02547	5.73501	3015.66	3063.83	4210.25	3475.84	4020.83	7177.73	5615.27	5968.72	8443.92	3098.86	3038.95	4318.23	3162.3	3202.68	4375.4	3308.78	3100.18	4416.77
Q60930	Vdac2	Voltage-dependent anion-selective channel protein 2	40	4.03797	5.10154	7.48614	4.0057	4.78631	7.41385	3.99665	4.98475	7.07619	4.17727	5.22974	7.73839	4.31902	5.19426	7.65489	4.09445	5.15093	7.55196	2009.9	2539.29	3726.23	1993.84	2382.38	3690.24	1989.33	2481.16	3522.17	2079.23	2603.1	3851.78	2149.79	2585.44	3810.22	2038.01	2563.87	3758.99
Q9WUA3	Pfkp	ATP-dependent 6-phosphofructokinase, platelet type	39	5.35751	3.06714	7.45374	6.02624	3.04535	7.49871	6.07506	3.41997	9.03409	5.8417	3.27476	7.35131	5.73312	3.35945	6.72837	5.73772	3.60467	7.39111	2849.79	1631.48	3964.82	3205.5	1619.89	3988.74	3231.47	1819.16	4805.44	3107.34	1741.92	3910.33	3049.58	1786.97	3578.98	3052.03	1917.41	3931.51
Q9QXZ0-3	Macf1	Isoform of Q9QXZ0, Isoform 3 of Microtubule-actin cross-linking factor 1	39	6.04006	5.08668	3.28484	6.54281	5.34899	3.82593	6.341	5.04186	3.04397	6.63364	6.6751	6.10923	5.79075	7.08692	4.76627	6.32948	6.93525	5.11722	3206.81	2700.64	1744	3473.74	2839.91	2031.28	3366.59	2676.84	1616.11	3521.96	3543.97	3243.54	3074.45	3762.62	2530.52	3360.47	3682.09	2716.86
Q9WVA4	Tagln2	Transgelin-2	39	5.68238	5.41991	5.52118	5.86781	5.36587	4.97077	5.85069	5.66808	5.88925	5.65732	4.5576	5.64369	6.24167	5.67904	6.49253	5.59429	4.53376	5.36415	5746.17	5480.76	5583.16	5933.69	5426.11	5026.57	5916.37	5731.71	5955.37	5720.83	4608.77	5707.05	6311.74	5742.8	6565.42	5657.09	4584.66	5424.37
Q80XI3	Eif4g3	Eukaryotic translation initiation factor 4 gamma 3	39	5.55439	4.32242	6.48743	5.69153	4.31668	6.32293	5.41357	4.03774	6.01941	5.96247	4.91678	6.29122	6.17175	5.24163	6.11215	5.8539	4.98123	6.30277	3177.58	2472.79	3711.36	3256.03	2469.51	3617.25	3097.02	2309.93	3443.61	3411.03	2812.82	3599.11	3530.76	2998.66	3496.67	3348.92	2849.68	3605.72
Q8BL66	Eea1	Early endosome antigen 1	39	5.56075	5.79134	5.99306	5.46737	5.6506	5.65044	5.20371	5.15247	5.62172	5.73372	5.55947	5.62092	5.75821	5.75082	5.63576	5.36333	5.1172	5.36914	4203.49	4377.8	4530.28	4132.9	4271.41	4271.29	3933.59	3894.86	4249.58	4334.24	4202.53	4248.98	4352.75	4347.17	4260.19	4054.26	3868.2	4058.65
P17183	Eno2	Gamma-enolase	39	6.19032	3.67663	4.41486	6.25051	4.37155	6.53327	9.88941	6.31108	7.66342	6.43159	3.76422	4.68047	6.16793	3.7438	4.94028	6.37086	3.83368	4.76614	4849.99	2880.56	3458.95	4897.14	3425.01	5118.68	7748.14	4944.6	6004.13	5039.01	2949.19	3667.05	4832.44	2933.19	3870.61	4991.43	3003.6	3734.17
P17182	Eno1	Alpha-enolase	39	7.64806	4.57825	5.07944	7.52684	4.42986	4.68389	7.17588	4.19033	4.58952	7.26524	4.00323	4.93248	7.30898	4.35494	5.23127	7.52978	4.12702	5.345	9198.05	5506.1	6108.87	9052.26	5327.64	5633.15	8630.18	5039.56	5519.65	8737.65	4814.55	5932.12	8790.25	5237.54	6291.46	9055.8	4963.43	6428.24
E9PWQ3	Col6a3	Collagen, type VI, alpha 3	39	2.13411	8.96502	5.34802	1.49333	8.8987	4.45391	1.4664	7.37915	4.58914	2.27949	10.8456	4.58656	2.71101	11.2302	5.82755	2.12605	11.2219	4.44383	1289.03	5415	3230.28	901.992	5374.94	2690.22	885.727	4457.11	2771.91	1376.84	6550.87	2770.34	1637.49	6783.21	3519.92	1284.17	6778.21	2684.13
Q05920	Pc	Pyruvate carboxylase, mitochondrial	39	1.33257	11.1343	6.82001	0.819503	9.81391	6.64495	1.18965	7.92468	6.78763	1.01869	9.66137	7.82089	1.17551	3.44307	8.51134	1.30447	7.55927	7.03821	852.952	7126.81	4365.34	524.546	6281.68	4253.29	761.47	5072.42	4344.62	652.041	6184.04	5005.98	752.416	2203.83	5447.93	834.966	4838.52	4505.01
B9EHJ3	Tjp1	Isoform of P39447, Tight junction protein ZO-1	39	7.39413	4.51119	5.1327	8.22381	4.38835	4.5643	8.15944	4.58324	4.61315	7.02366	4.40331	3.74988	7.51199	5.08204	3.68386	7.90846	4.60714	4.45936	3662.72	2234.65	2542.51	4073.71	2173.79	2260.95	4041.82	2270.33	2285.15	3479.21	2181.21	1857.52	3721.11	2517.42	1824.82	3917.5	2282.17	2208.97
Q8R0Y6	Aldh1l1	Cytosolic 10-formyltetrahydrofolate dehydrogenase	39	3.20656	9.95963	5.93059	2.93171	8.68724	5.445	2.98442	6.59745	5.12284	2.88198	8.33148	6.92399	2.92668	3.484	8.12056	3.34307	6.80011	6.3227	2870.07	8914.48	5308.24	2624.06	7775.61	4873.61	2671.24	5905.12	4585.25	2579.55	7457.19	6197.4	2619.56	3118.39	7268.4	2992.26	6086.51	5659.2
P99029	Prdx5	Peroxiredoxin-5, mitochondrial	39	7.05567	4.81531	5.08466	7.21205	4.81879	4.73729	6.83151	4.48238	5.10207	6.53223	4.03217	5.19882	6.67354	4.87371	5.69383	7.08883	4.31006	5.45708	9449.71	6449.17	6809.92	9659.15	6453.84	6344.68	9149.49	6003.28	6833.24	8748.66	5400.31	6962.81	8937.92	6527.4	7625.79	9494.12	5772.49	7308.7
Q3U0V1	Khsrp	Far upstream element-binding protein 2	39	6.08449	5.23491	6.53531	6.39285	5.27098	5.98252	6.07662	5.14185	7.12649	5.55619	4.57991	5.13701	5.43773	4.9355	4.85284	5.70198	4.58297	5.36985	3003.18	2583.84	3225.69	3155.38	2601.65	2952.85	2999.29	2537.91	3517.49	2742.42	2260.55	2535.52	2683.95	2436.06	2395.26	2814.38	2262.06	2650.45
Q3UPL0	Sec31a	Protein transport protein Sec31A	39	6.51062	5.03655	4.68447	6.54562	5.15639	5.00614	7.34099	5.67829	4.81103	6.5911	4.86328	4.69536	6.79174	5.13324	4.89256	6.73633	4.95406	4.57224	5890.11	4556.53	4238.01	5921.78	4664.95	4529.02	6641.34	5137.11	4352.51	5962.93	4399.78	4247.86	6144.45	4644.01	4426.26	6094.31	4481.91	4136.48
B2RQC6	Cad	CAD protein	39	4.69847	5.66598	5.71899	4.87192	6.26577	6.55941	5.19839	6.64343	5.95356	4.86919	5.95488	5.22611	5.16543	5.58906	5.48899	4.8093	6.22406	5.09707	3330.4	4016.19	4053.77	3453.34	4441.33	4649.47	3684.75	4709.03	4220.04	3451.4	4220.97	3704.4	3661.38	3961.66	3890.74	3408.95	4411.77	3612.93
P35564	Canx	Calnexin	39	4.99226	4.56488	6.32604	4.87007	4.44709	6.1336	4.30597	3.99959	5.92802	5.48286	5.01166	7.29331	5.79711	5.46747	7.6379	5.40482	4.9189	7.41846	5645.87	5162.53	7154.27	5507.68	5029.32	6936.63	4869.72	4523.23	6704.15	6200.7	5667.81	8248.18	6556.1	6183.3	8637.89	6112.44	5562.91	8389.72
Q8BFW7	Lpp	Lipoma-preferred partner homolog	39	6.02813	5.7545	4.74668	5.63966	5.91977	4.77951	5.49749	6.15608	4.64567	5.46807	5.38172	5.38998	5.80086	6.62674	6.63061	5.4802	5.33308	4.72126	6640.15	6338.74	5228.61	6212.24	6520.8	5264.76	6055.64	6781.09	5117.33	6023.24	5928.11	5937.21	6389.82	7299.55	7303.8	6036.6	5874.54	5200.6
Q9D8N0	Eef1g	Elongation factor 1-gamma	38	5.73065	5.22432	5.23468	5.6858	5.68657	5.41003	5.56416	5.46673	5.57876	5.41267	5.70731	5.73226	5.79623	5.54026	5.969	5.60411	5.3601	5.29637	4867.46	4437.4	4446.2	4829.37	4830.03	4595.14	4726.05	4643.3	4738.45	4597.38	4847.64	4868.83	4923.17	4705.75	5069.91	4759.98	4552.72	4498.6
Q78PY7	Snd1	Staphylococcal nuclease domain-containing protein 1	38	5.82335	4.83161	6.04143	5.77424	4.80017	5.72499	5.63029	4.59974	5.23726	5.82131	4.91731	6.33746	6.0584	5.07788	6.68299	5.9378	4.78376	5.92001	4257.54	3532.46	4416.98	4221.64	3509.48	4185.63	4116.4	3362.95	3829.04	4256.05	3595.12	4633.42	4429.39	3712.52	4886.04	4341.22	3497.49	4328.22
P37804	Tagln	Transgelin	38	5.39645	5.30782	3.82518	5.50573	5.16083	3.29716	5.40958	5.53136	2.97586	7.06388	5.60116	5.28567	7.67114	8.38274	7.32343	6.15572	5.84026	4.26605	5572	5480.49	3949.61	5684.83	5328.72	3404.42	5585.56	5711.3	3072.67	7293.67	5783.37	5457.62	7920.69	8655.43	7561.66	6355.97	6030.25	4404.83
P14733	Lmnb1	Lamin-B1	38	5.60264	6.20675	5.9836	5.84685	6.2887	5.88588	5.44749	6.34442	6.03532	5.17428	5.66401	4.97651	4.94449	5.84221	4.59231	4.86772	5.32138	4.97544	4502.72	4988.23	4808.89	4698.98	5054.09	4730.35	4378.03	5098.87	4850.45	4158.46	4552.04	3999.51	3973.78	4695.25	3690.74	3912.08	4276.67	3998.65
Q9D0F9	Pgm1	Phosphoglucomutase-1	38	7.03565	4.86143	4.34304	7.20215	4.80938	4.50142	6.64833	4.24007	3.79426	7.1538	4.93426	5.13154	7.36036	4.64622	5.14121	7.71707	4.98351	5.49629	6541.27	4519.82	4037.86	6696.06	4471.43	4185.11	6181.16	3942.13	3527.64	6651.11	4587.53	4770.95	6843.16	4319.73	4779.95	7174.8	4633.33	5110.07
Q99PL5	Rrbp1	Ribosome-binding protein 1	38	7.10624	4.91646	4.50718	6.38863	4.73498	4.68897	6.1562	4.22491	3.67753	7.88752	4.95805	4.99809	8.43012	5.30168	5.18251	7.61866	4.50604	4.71622	6684.88	4624.94	4239.93	6009.82	4454.22	4410.94	5791.17	3974.4	3459.48	7419.83	4664.07	4701.73	7930.26	4987.32	4875.22	7166.92	4238.86	4436.58
Q9Z1Q9	Vars1	Valine--tRNA ligase	38	6.26684	5.49615	4.81032	6.36841	5.40505	4.83696	6.05938	5.32846	4.29408	6.61382	5.78448	4.79754	6.95388	5.4305	4.67893	6.45308	5.5885	4.83362	5022.56	4404.89	3855.23	5103.96	4331.88	3876.58	4856.29	4270.5	3441.49	5300.65	4635.97	3844.99	5573.19	4352.27	3749.93	5171.82	4478.9	3873.9
P09411	Pgk1	Phosphoglycerate kinase 1	38	6.72919	3.51619	5.47824	6.93618	3.62222	5.58143	7.24318	3.73808	5.74138	6.83155	3.72828	5.81242	7.37973	3.90994	6.39004	7.23426	4.02897	6.09872	4250.36	2220.94	3460.22	4381.11	2287.91	3525.4	4575.02	2361.09	3626.43	4315.02	2354.9	3671.3	4661.26	2469.64	4036.15	4569.38	2544.82	3852.14
Q61879	Myh10	Myosin-10	38	7.37336	5.89799	3.84506	8.09498	5.92541	3.47625	7.61516	6.12043	3.31799	6.79887	5.55406	3.98115	5.82206	6.61843	4.33526	6.04892	5.50849	3.66613	6836.61	5468.64	3565.16	7505.7	5494.06	3223.2	7060.8	5674.88	3076.45	6303.94	5149.75	3691.34	5398.23	6136.64	4019.67	5608.58	5107.49	3399.25
E9QPE7	Myh11	Isoform of O08638, Myosin-11	38	1.47331	5.56955	3.71413	0.980684	4.29229	2.61022	1.10014	5.04162	2.42538	1.50469	11.7443	5.04498	2.70278	30.2106	7.7006	1.17767	8.9113	3.79572	963.817	3643.52	2429.73	641.549	2807.95	1707.57	719.694	3298.16	1586.65	984.346	7682.98	3300.36	1768.12	19763.4	5037.62	770.417	5829.65	2483.11
Q6P5E4	Uggt1	UDP-glucose:glycoprotein glucosyltransferase 1	38	5.42324	4.18223	6.51484	5.5718	4.37268	6.52261	5.59447	4.23421	6.34705	5.70373	4.73532	6.57055	5.81123	4.64559	7.09722	5.65241	4.40291	6.6179	4537.22	3498.96	5450.47	4661.51	3658.29	5456.97	4680.47	3542.45	5310.1	4771.88	3961.69	5497.08	4861.82	3886.61	5937.71	4728.95	3683.59	5536.7
E9QA15	Cald1	Caldesmon 1	38	7.54011	6.41734	3.607	7.7933	6.78108	3.30634	6.77797	7.1564	3.62356	5.94842	5.34086	3.73985	6.00289	6.23576	4.36934	6.05396	5.6671	3.63872	4849.45	4127.33	2319.85	5012.28	4361.27	2126.48	4359.27	4602.66	2330.51	3825.74	3434.99	2405.29	3860.78	4010.55	2810.15	3893.63	3644.81	2340.25
Q2PZL6	Fat4	Protocadherin Fat 4	38	5.311	12.1556	2.10255	4.12915	12.0117	2.18727	3.65792	12.2046	2.06365	3.91582	9.287	1.90547	3.36487	9.42178	1.60305	3.59497	9.0795	2.00411	2778.83	6360.1	1100.1	2160.46	6284.77	1144.43	1913.9	6385.7	1079.75	2048.84	4859.17	996.985	1760.58	4929.68	838.753	1880.97	4750.6	1048.59
P37889	Fbln2	Fibulin-2	38	10.2806	3.26497	1.30778	10.0348	3.10954	1.34609	10.7442	3.56664	0.67898	13.5018	4.10318	2.53218	12.5001	3.0002	2.30759	10.7008	4.70627	2.31426	6330.5	2010.47	805.29	6179.12	1914.76	828.88	6615.93	2196.23	418.095	8314.01	2526.61	1559.24	7697.2	1847.43	1420.95	6589.2	2897.98	1425.05
Q9DCW4	Etfb	Electron transfer flavoprotein subunit beta	38	4.51435	7.78204	4.94049	4.66666	8.62568	5.38278	5.0968	8.50309	6.0248	4.11412	6.61918	4.46178	3.87375	5.38278	4.21893	4.41214	6.62002	4.76061	2003.24	3453.28	2192.34	2070.83	3827.64	2388.61	2261.71	3773.25	2673.5	1825.64	2937.26	1979.92	1718.98	2388.61	1872.15	1957.89	2937.63	2112.52
Q8CAQ8	Immt	MICOS complex subunit Mic60	38	4.32619	6.63219	7.02937	4.09568	6.25928	6.90767	3.93988	5.45735	6.53444	3.85473	6.14151	6.96709	3.82467	5.28719	6.29018	4.0728	5.57619	6.8036	3753.89	5754.83	6099.47	3553.87	5431.25	5993.87	3418.68	4735.41	5670.01	3344.8	5329.06	6045.43	3318.71	4587.76	5458.06	3534.02	4838.53	5903.57
P46935	Nedd4	E3 ubiquitin-protein ligase NEDD4	38	7.67823	7.15226	2.80023	7.89334	6.94276	2.38272	7.36902	6.81761	2.11439	7.43841	6.15255	2.67284	7.14969	6.27589	3.10543	7.3886	5.86554	2.80049	4112.46	3830.75	1499.81	4227.68	3718.55	1276.19	3946.85	3651.52	1132.47	3984.02	3295.31	1431.58	3829.38	3361.37	1663.27	3957.34	3141.59	1499.94
Q6P5D8	Smchd1	Structural maintenance of chromosomes flexible hinge domain-containing protein 1	38	5.42044	5.62666	5.76388	5.58195	5.7103	5.5441	5.25009	5.47825	5.21307	5.66019	5.78284	5.67221	5.55871	5.57871	5.52147	5.15528	6.1669	5.31494	3177.7	3298.59	3379.04	3272.38	3347.63	3250.19	3077.83	3211.59	3056.13	3318.25	3390.15	3325.3	3258.76	3270.48	3236.93	3022.25	3615.3	3115.85
G5E924	Hnrnpl	Isoform of Q8R081, Heterogeneous nuclear ribonucleoprotein L (Fragment)	38	6.68513	6.39605	4.69706	6.60138	6.25879	4.57207	6.22866	6.08359	4.56064	6.16269	6.01268	3.9534	6.23199	6.06016	3.62844	6.02365	5.68393	4.15969	5104.52	4883.79	3586.51	5040.57	4778.99	3491.07	4755.98	4645.21	3482.34	4705.61	4591.06	3018.68	4758.53	4627.32	2770.54	4599.44	4340.05	3176.19
Q91VD9	Ndufs1	NADH-ubiquinone oxidoreductase 75 kDa subunit, mitochondrial	38	4.04872	5.98303	7.23978	3.87328	6.09532	7.05827	4.14257	5.59543	7.67523	3.76443	5.96936	7.11496	3.75367	5.19088	6.84552	3.7492	5.41584	6.48451	3080.38	4552.06	5508.24	2946.91	4637.5	5370.14	3151.79	4257.17	5839.54	2864.09	4541.66	5413.27	2855.9	3949.38	5208.27	2852.51	4120.53	4933.61
Q501J6	Ddx17	Probable ATP-dependent RNA helicase DDX17	38	5.74053	5.40433	6.0185	5.71706	5.47888	5.98736	5.64011	5.5556	6.19362	5.78755	5.37865	5.39758	5.59031	5.29878	5.14692	5.51978	4.88092	5.26349	3979.89	3746.81	4172.61	3963.62	3798.5	4151.02	3910.28	3851.68	4294.02	4012.49	3729.01	3742.13	3875.75	3673.63	3568.35	3826.85	3383.93	3649.17
P16015	Ca3	Carbonic anhydrase 3	38	0.648826	12.1023	2.38057	0.305421	11.8794	3.75613	0.377283	7.10643	3.42707	0.561291	14.6835	7.40662	0.471805	9.77531	3.74128	0.559969	14.6596	6.15727	532.111	9925.23	1952.34	250.48	9742.46	3080.46	309.415	5828.08	2810.59	460.322	12042.1	6074.28	386.934	8016.87	3068.28	459.238	12022.5	5049.66
P70670	Naca	Nascent polypeptide-associated complex subunit alpha, muscle-specific form	37	1.35727	2.0076	2.03442	2.62138	3.34844	3.67849	1.71259	2.44277	2.73192	6.55002	10.5862	11.1323	4.99551	11.9524	6.8401	5.98064	11.0364	8.99152	1120.77	1657.78	1679.93	2164.61	2764.99	3037.52	1414.18	2017.13	2255.89	5408.7	8741.61	9192.54	4125.06	9869.75	5648.24	4938.54	9113.34	7424.78
P11499	Hsp90ab1	Heat shock protein HSP 90-beta	37	5.65052	5.40711	5.53086	5.65843	5.7703	5.03158	5.57791	5.69326	5.76309	5.67345	6.11592	5.18722	5.76871	5.6097	5.31588	5.47641	5.53057	5.23909	4558.96	4362.57	4462.41	4565.34	4655.6	4059.59	4500.37	4593.45	4649.78	4577.46	4934.45	4185.16	4654.32	4526.02	4288.96	4418.48	4462.18	4227.01
P08113	Hsp90b1	Endoplasmin	37	6.09391	4.6314	5.80495	5.62544	4.69198	5.4514	5.34571	4.075	4.97056	6.60336	4.93388	6.00344	7.19549	4.85555	7.11318	6.39755	4.51219	5.69502	4464.27	3392.87	4252.58	4121.08	3437.24	3993.58	3916.15	2985.26	3641.33	4837.48	3614.46	4397.99	5271.26	3557.07	5210.96	4686.71	3305.53	4172.05
P26041	Msn	Moesin	37	6.89676	4.40997	5.08322	6.43635	4.20468	4.92213	6.508	3.93275	4.09244	7.15677	4.54048	5.69819	7.80746	5.0785	6.39022	7.23833	4.23332	5.37042	5145.71	3290.3	3792.62	4802.19	3137.13	3672.43	4855.66	2934.25	3053.39	5339.71	3387.68	4251.45	5825.19	3789.09	4767.78	5400.56	3158.5	4006.9
B1B1A8	Mylk	Isoform of Q6PDN3, Myosin light chain kinase, smooth muscle	37	5.72061	7.5479	1.34371	5.76909	7.724	1.52554	5.69891	8.24928	1.18269	6.51935	9.52478	1.12071	6.25254	12.8419	1.37171	6.46085	9.84382	1.30262	2528.77	3336.51	593.978	2550.2	3414.36	674.357	2519.17	3646.55	522.803	2881.84	4210.38	495.406	2763.91	5676.7	606.358	2855.99	4351.41	575.816
Q8BMF4	Dlat	Dihydrolipoyllysine-residue acetyltransferase component of pyruvate dehydrogenase complex, mitochondrial	37	3.24606	5.84996	8.0149	3.06832	5.37846	8.77808	3.36785	5.13167	9.45115	3.11151	5.72664	8.2339	3.08415	4.00497	7.53017	3.13012	5.2752	7.61689	1849.72	3333.51	4567.17	1748.44	3064.84	5002.07	1919.12	2924.21	5385.6	1773.05	3263.24	4691.97	1757.46	2282.17	4290.96	1783.66	3006	4340.38
P17710	Hk1	Hexokinase-1	37	5.50073	4.16685	6.59528	5.34273	4.38386	6.37308	5.05796	4.36422	6.24548	5.55715	4.71318	7.02968	5.54327	5.02839	7.16782	5.6773	4.57189	6.68111	4653.66	3525.19	5579.66	4519.99	3708.78	5391.68	4279.07	3692.17	5283.73	4701.39	3987.38	5947.16	4689.65	4254.06	6064.03	4803.04	3867.86	5652.27
O88685	Psmc3	26S proteasome regulatory subunit 6A	37	5.48552	5.41895	5.66386	5.54222	5.60068	5.93783	5.65498	5.83614	6.29721	5.32782	5.38424	5.43398	5.49959	5.52166	5.34645	5.22677	5.47751	5.34457	5038.29	4977.15	5202.08	5090.37	5144.06	5453.73	5193.94	5360.33	5783.8	4893.45	4945.27	4990.95	5051.21	5071.48	4910.55	4800.64	5030.93	4908.83
Q8CGB9	Ide	Isoform of Q9JHR7, Insulin-degrading enzyme	37	5.3822	5.13861	6.89196	5.2434	5.01407	7.03513	5.08023	4.56494	6.62159	5.32495	4.63869	6.1223	5.43753	5.16195	5.75719	5.34293	4.84911	6.39321	4435.14	4234.41	5679.24	4320.76	4131.79	5797.21	4186.3	3761.68	5456.44	4387.96	3822.45	5045	4480.73	4253.64	4744.14	4402.77	3995.85	5268.25
P57780	Actn4	Alpha-actinin-4	37	7.51489	5.37279	4.4303	7.67934	5.33959	4.25503	7.0814	5.59136	3.90563	5.83863	5.18617	4.82151	5.88302	5.88672	5.79151	5.99472	5.40146	4.02593	7246.96	5181.23	4272.34	7405.55	5149.22	4103.33	6828.93	5392.01	3766.39	5630.47	5001.27	4649.6	5673.27	5676.84	5585.02	5780.99	5208.89	3882.39
Q99JY9	Actr3	Actin-related protein 3	37	5.68927	5.851	6.00822	5.46799	5.38953	6.23976	4.88302	5.30114	5.42815	5.30294	5.27183	6.28662	5.08813	5.56066	6.41483	5.09208	5.03833	5.68651	4271.56	4392.99	4511.04	4105.42	4046.52	4684.88	3666.22	3980.15	4075.51	3981.51	3958.14	4720.06	3820.22	4175	4816.32	3823.18	3782.83	4269.49
Q9CQ65	Mtap	S-methyl-5'-thioadenosine phosphorylase	37	4.11534	4.54505	7.83671	4.06742	4.79272	7.59524	4.35569	5.09793	9.64488	4.15387	4.41435	7.88059	3.90263	4.29371	8.45066	3.88118	4.15428	6.81775	1385.3	1529.94	2637.98	1369.17	1613.32	2556.69	1466.2	1716.06	3246.64	1398.27	1485.95	2652.75	1313.69	1445.34	2844.64	1306.47	1398.41	2294.97
P26231	Ctnna1	Catenin alpha-1	37	6.28946	4.71083	5.15105	6.08563	4.82006	5.46299	6.40321	5.17932	5.19246	6.95245	5.04452	4.64579	6.87092	6.28038	4.23548	6.4906	5.32622	4.85863	5807.55	4349.87	4756.37	5619.34	4450.74	5044.41	5912.59	4782.47	4794.6	6419.74	4658	4289.82	6344.46	5799.17	3910.95	5993.28	4918.12	4486.35
P80316	Cct5	T-complex protein 1 subunit epsilon	37	5.39442	5.21069	6.26339	5.04599	5.4099	6.36847	5.07716	5.12045	5.95129	5.20635	5.23154	6.22239	5.39738	5.4864	6.18245	5.3097	5.03133	6.0907	3778.22	3649.54	4386.84	3534.18	3789.06	4460.44	3556.01	3586.33	4168.25	3646.49	3664.14	4358.12	3780.29	3842.64	4330.15	3718.88	3523.92	4265.89
P63260	Actg1	Actin, cytoplasmic 2	37	4.34345	4.01691	8.90027	4.89023	5.0028	9.43697	5.1147	5.64661	12.3037	2.99361	3.81958	6.94974	2.43078	3.04772	8.63301	2.30625	4.475	5.68866	1944.73	1798.53	3985	2189.55	2239.95	4225.3	2290.05	2528.21	5508.84	1340.36	1710.18	3111.67	1088.36	1364.58	3865.33	1032.6	2003.63	2547.03
F8WIE5	Hectd1	Isoform of Q69ZR2, HECT-type E3 ubiquitin transferase	37	5.53029	5.23666	4.5713	5.59799	5.50194	5.58237	6.54839	6.09999	5.5046	6.30757	5.92813	5.10563	5.91604	5.69003	4.73625	5.86376	5.52724	4.75182	3073.94	2910.73	2540.89	3111.57	3058.18	3102.89	3639.84	3390.6	3059.66	3505.98	3295.07	2837.89	3288.35	3162.73	2632.58	3259.29	3072.24	2641.24
P56480	Atp5f1b	ATP synthase subunit beta, mitochondrial	37	4.08479	6.24201	6.52274	3.98854	6.12363	6.58682	4.02773	5.73693	7.30814	3.96558	5.84561	6.77803	4.02966	5.39772	6.34692	4.19415	5.73722	7.08379	1906.49	2913.33	3044.35	1861.57	2858.08	3074.26	1879.86	2677.59	3410.92	1850.85	2728.32	3163.5	1880.76	2519.27	2962.29	1957.53	2677.73	3306.21
Q99PV0	Prpf8	Pre-mRNA-processing-splicing factor 8	37	5.72536	5.75606	5.4952	6.21155	5.96969	5.64999	6.32812	5.9407	5.41963	5.60327	6.07648	4.72594	5.5805	5.46819	4.26834	5.33443	5.76654	4.68002	3357.02	3375.03	3222.07	3642.09	3500.28	3312.83	3710.44	3483.28	3177.76	3285.43	3562.9	2771.02	3272.08	3206.23	2502.71	3127.8	3381.17	2744.09
Q9JKF1	Iqgap1	Ras GTPase-activating-like protein IQGAP1	37	7.66777	5.44157	4.05007	7.44188	5.40845	3.98513	7.80755	5.59117	3.66441	7.30384	5.22701	3.78902	7.19107	5.49802	4.25744	6.99705	4.97584	3.70272	7516.47	5334.2	3970.15	7295.05	5301.73	3906.5	7653.5	5480.85	3592.1	7159.73	5123.87	3714.26	7049.18	5389.53	4173.43	6858.98	4877.66	3629.66
Q6ZQ08	Cnot1	CCR4-NOT transcription complex subunit 1	37	6.74534	5.9897	4.63999	6.95346	6.03667	4.37129	6.73881	5.89316	4.22147	6.5389	5.61415	4.07837	6.30633	5.70573	4.08506	6.31895	5.57288	4.18974	2692.77	2391.11	1852.31	2775.85	2409.87	1745.04	2690.16	2352.58	1685.23	2610.36	2241.2	1628.1	2517.52	2277.75	1630.78	2522.56	2224.72	1672.56
F8VPN4	Agl	4-alpha-glucanotransferase	37	6.71286	5.92619	3.48804	6.63883	5.70682	3.74044	5.6558	5.3787	3.35145	5.8675	7.28219	5.55546	5.44658	6.39016	4.74318	5.29715	7.67682	5.14184	4794.82	4232.93	2491.42	4741.94	4076.23	2671.7	4039.79	3841.86	2393.86	4191	5201.48	3968.12	3890.35	4564.33	3387.93	3783.62	5483.35	3672.68
Q61598	Gdi2	Rab GDP dissociation inhibitor beta	37	5.6615	5.66522	5.445	6.07185	6.28783	5.33977	8.33461	7.68447	8.04335	5.11104	4.56735	4.11751	5.02987	4.36741	4.12952	5.15195	4.52349	4.46826	4188.35	4191.11	4028.19	4491.93	4651.72	3950.34	6165.91	5684.94	5950.44	3781.12	3378.91	3046.12	3721.08	3230.99	3055	3811.4	3346.46	3305.6
Q6GT24	Prdx6	Isoform of O08709, Peroxiredoxin-6	37	3.27366	2.71434	9.93676	3.33235	2.65743	9.34197	3.35439	2.60017	10.0128	3.22813	2.30359	10.7751	3.72421	2.45109	14.201	3.44653	2.48385	10.1626	2745.98	2276.82	8335.06	2795.21	2229.08	7836.14	2813.7	2181.05	8398.87	2707.79	1932.28	9038.25	3123.91	2056	11912	2890.98	2083.48	8524.52
P14211	Calr	Calreticulin	37	5.5222	4.84268	6.08827	5.26052	5.2466	5.91156	5.46967	4.95292	6.80799	5.49419	4.91906	6.16172	5.7818	4.63677	6.74814	5.57919	4.46589	6.11084	7191.16	6306.27	7928.31	6850.39	6832.27	7698.19	7122.75	6449.83	8865.56	7154.69	6405.75	8023.97	7529.22	6038.13	8787.62	7265.38	5815.61	7957.71
Q64511	Top2b	DNA topoisomerase 2-beta	36	5.8055	5.84579	5.0347	6.22386	5.87183	5.8441	6.57302	6.46174	5.27523	5.89088	5.48477	4.54857	5.88406	5.59199	4.35055	5.54978	5.1443	4.61933	3449.71	3473.65	2991.69	3698.3	3489.12	3472.65	3905.77	3839.65	3134.61	3500.44	3259.12	2702.82	3496.39	3322.84	2585.15	3297.76	3056.81	2744.87
E9PVA8	Gcn1	eIF-2-alpha kinase activator GCN1	36	5.42496	5.58729	5.95074	5.34246	5.78857	5.59603	5.3175	5.46197	5.55136	5.10203	5.5818	5.87581	5.23786	5.58806	6.01587	5.21405	5.77633	5.58731	2810.89	2895.01	3083.33	2768.15	2999.3	2899.53	2755.21	2830.07	2876.39	2643.57	2892.16	3044.5	2713.95	2895.4	3117.07	2701.61	2992.95	2895.01
P58774	Tpm2	Tropomyosin beta chain	36	4.59489	4.83143	4.03565	5.19302	4.73201	5.12763	4.90247	5.90744	6.10325	5.98322	5.36021	6.36883	5.97643	8.255	5.93406	5.83431	5.36874	5.49142	4898.53	5150.71	4302.33	5536.19	5044.72	5466.47	5226.44	6297.82	6506.57	6378.6	5714.43	6789.7	6371.36	8800.51	6326.2	6219.85	5723.52	5854.31
Q9ERG0	Lima1	LIM domain and actin-binding protein 1	36	5.09676	3.85051	7.28704	5.42098	3.98259	6.54932	4.9849	3.96941	6.76718	5.81223	3.53656	7.44038	5.85113	4.56116	9.29085	5.23046	3.6647	6.70383	2748.91	2076.75	3930.22	2923.77	2147.99	3532.34	2688.57	2140.88	3649.84	3134.79	1907.42	4012.93	3155.77	2460.04	5010.97	2821.02	1976.54	3615.67
Q91VW5	Golga4	Golgin subfamily A member 4	36	6.02148	5.09845	5.83018	6.0914	5.07589	5.41972	5.52779	4.72092	5.19102	5.91727	5.24789	6.02358	6.09186	5.41672	5.63331	5.9202	5.03437	5.73795	4734.38	4008.65	4583.97	4789.35	3990.91	4261.25	4346.22	3711.82	4081.43	4652.45	4126.14	4736.03	4789.72	4258.89	4429.18	4654.75	3958.26	4511.46
Q3TLH4	Prrc2c	Protein PRRC2C	36	6.12606	5.71985	5.01155	6.22018	5.40043	4.83144	5.80286	5.11716	4.60277	6.30167	5.63803	5.15045	6.44906	6.01653	4.93172	6.12869	5.45159	5.09997	3649.37	3407.38	2985.44	3705.43	3217.1	2878.15	3456.84	3048.36	2741.93	3753.98	3358.65	3068.19	3841.78	3584.12	2937.88	3650.94	3247.58	3038.11
P26040	Ezr	Ezrin	36	6.82151	6.32565	4.55339	6.5305	6.05188	4.48629	6.72572	6.52187	4.12744	6.44108	5.5822	4.10532	5.86064	5.83984	4.49762	5.95432	5.39053	4.18421	5178.97	4802.5	3456.98	4958.02	4594.65	3406.04	5106.24	4951.48	3133.6	4890.14	4238.07	3116.81	4449.47	4433.67	3414.64	4520.58	4092.55	3176.69
Q6PB44	Ptpn23	Tyrosine-protein phosphatase non-receptor type 23	36	6.81953	5.21424	5.06505	6.90536	5.20673	4.83264	6.7362	5.31126	4.66354	6.5517	4.94971	5.02264	6.45423	5.0272	5.05877	6.49562	4.91318	4.77241	3732.61	2853.97	2772.31	3779.59	2849.86	2645.1	3687	2907.07	2552.55	3586.01	2709.18	2749.1	3532.67	2751.59	2768.87	3555.32	2689.19	2612.14
Q3V117	Acly	Isoform of Q91V92, ATP-citrate synthase	36	4.35973	7.30736	6.74394	3.66695	6.96411	6.18893	3.7695	5.50418	5.71006	4.24765	7.0231	6.30166	4.42225	4.84035	6.73752	4.1243	5.83907	6.24934	4287.35	7186.04	6631.98	3606.07	6848.49	6086.18	3706.91	5412.8	5615.26	4177.13	6906.5	6197.04	4348.83	4759.99	6625.66	4055.83	5742.12	6145.58
P38647	Hspa9	Stress-70 protein, mitochondrial	36	2.98415	5.46787	7.1568	2.75276	5.55643	7.6436	3.2976	4.9414	9.1706	3.41619	5.96357	8.1438	3.88914	4.64606	8.57756	3.32155	5.78684	7.28407	3143.79	5760.38	7539.67	2900.03	5853.69	8052.51	3474.02	5205.75	9661.2	3598.94	6282.61	8579.47	4097.2	4894.61	9036.43	3499.24	6096.42	7673.75
P63017	Hspa8	Heat shock cognate 71 kDa protein	36	6.19848	5.3416	5.58046	5.64694	5.27323	5.33728	5.39794	4.88225	4.96224	5.7084	5.55658	6.04062	5.88697	5.57001	6.06079	5.70684	5.23668	5.6127	5251.38	4525.43	4727.79	4784.11	4467.5	4521.77	4573.16	4136.26	4204.03	4836.18	4707.56	5117.64	4987.46	4718.94	5134.73	4834.86	4436.54	4755.1
Q60715	P4ha1	Prolyl 4-hydroxylase subunit alpha-1	36	8.10549	3.15057	4.19023	8.20039	3.4703	3.99847	8.64	3.46424	3.57802	9.19747	3.70032	4.45929	9.98453	3.79886	5.07159	8.71234	3.6122	4.66571	7483.12	2908.66	3868.48	7570.72	3203.83	3691.45	7976.58	3198.24	3303.28	8491.25	3416.19	4116.88	9217.87	3507.16	4682.17	8043.37	3334.84	4307.46
Q8VDM4	Psmd2	26S proteasome non-ATPase regulatory subunit 2	36	5.49324	5.67037	5.37818	4.94413	5.48595	5.92519	4.94653	5.23764	5.02457	5.6987	5.91354	5.76817	5.87365	5.65468	5.85777	5.6671	5.86106	5.59955	3040.18	3138.21	2976.5	2736.28	3036.14	3279.23	2737.6	2898.72	2780.8	3153.88	3272.79	3192.33	3250.71	3129.52	3241.92	3136.4	3243.74	3099.01
Q62261	Sptbn1	Spectrin beta chain, non-erythrocytic 1	36	5.8488	6.34826	4.4612	6.11657	6.48412	4.60515	6.66078	7.43496	4.82342	5.24403	6.63626	4.15805	5.21352	6.28327	4.20197	4.9619	6.62629	3.89143	2495.75	2708.88	1903.65	2610.01	2766.85	1965.07	2842.24	3172.59	2058.21	2237.69	2831.77	1774.29	2224.67	2681.14	1793.03	2117.3	2827.52	1660.52
Q9CW03	Smc3	Structural maintenance of chromosomes protein 3	36	6.264	6.4616	5.11209	6.36179	6.27257	4.92802	5.87071	5.86954	4.7599	5.96844	5.8511	4.33926	5.90837	6.0781	3.94656	5.86541	5.67375	4.46879	3533.83	3645.31	2883.98	3589	3538.67	2780.14	3311.95	3311.3	2685.29	3367.09	3300.89	2447.99	3333.2	3428.96	2226.45	3308.96	3200.84	2521.06
Q9CWS0	Ddah1	N(G),N(G)-dimethylarginine dimethylaminohydrolase 1	36	6.43934	4.53854	4.77612	6.47855	4.50423	4.9053	6.72413	4.54075	4.40499	6.54868	4.08121	5.98057	6.82026	5.03136	7.85122	6.6195	4.15425	5.601	5687.03	4008.3	4218.13	5721.66	3978	4332.22	5938.55	4010.25	3890.36	5783.6	3604.4	5281.86	6023.45	4443.54	6933.96	5846.14	3668.9	4946.63
E9Q411	Nbas	Neuroblastoma-amplified sequence	36	6.1214	5.35879	5.2166	5.95923	5.32927	5.45798	5.83642	5.05802	4.39534	6.38279	5.41961	5.3794	6.37664	5.04643	5.27719	6.53537	5.34851	5.50103	2286.36	2001.52	1948.41	2225.79	1990.49	2038.57	2179.92	1889.18	1641.67	2383.99	2024.24	2009.22	2381.69	1884.86	1971.04	2440.98	1997.68	2054.65
Q9DAW9	Cnn3	Calponin-3	36	7.11381	4.44233	5.38166	7.03391	4.43378	5.2703	7.35744	5.3524	5.6143	6.40015	3.92792	5.43372	6.07182	4.54655	5.74787	6.3724	4.34397	5.15566	5443.55	3399.3	4118.09	5382.41	3392.77	4032.87	5629.97	4095.7	4296.1	4897.44	3005.68	4157.93	4646.2	3479.06	4398.32	4876.21	3324.04	3945.15
P54071	Idh2	Isocitrate dehydrogenase [NADP], mitochondrial	36	5.1551	6.67406	5.20721	5.13929	6.97368	6.31376	6.24163	8.21308	6.92998	4.68186	5.59163	4.23014	4.27996	5.27736	3.57773	5.06694	5.69647	4.75009	2591.36	3354.91	2617.56	2583.41	3505.52	3173.8	3137.54	4128.54	3483.55	2353.47	2810.79	2126.4	2151.45	2652.82	1798.45	2547.04	2863.5	2387.77
Q8BMK4	Ckap4	Cytoskeleton-associated protein 4	36	6.65709	3.76527	6.47078	6.3234	3.81141	5.58744	5.70551	3.40679	5.10192	6.52445	3.69737	6.77263	7.35162	4.12598	8.2422	6.55938	3.61132	6.28543	4965.47	2808.48	4826.51	4716.58	2842.9	4167.63	4255.7	2541.1	3805.49	4866.54	2757.84	5051.66	5483.52	3077.54	6147.8	4892.6	2693.65	4688.26
P28658	Atxn10	Ataxin-10	36	5.82725	5.65113	4.35907	5.85963	6.06541	5.22251	7.05248	7.32167	5.47525	5.91701	5.41799	4.35302	5.87429	5.3785	4.58096	6.02853	5.33023	4.28506	3540.05	3433.06	2648.14	3559.72	3684.73	3172.67	4284.38	4447.91	3326.21	3594.58	3291.43	2644.46	3568.63	3267.44	2782.93	3662.33	3238.11	2603.17
Q922D8	Mthfd1	C-1-tetrahydrofolate synthase, cytoplasmic	36	6.51241	6.05346	4.86215	6.35033	5.84998	4.80144	6.55713	5.93859	4.50808	5.68053	5.71679	4.99718	5.43778	5.38697	5.17597	5.8353	5.59878	4.73713	5134.26	4772.44	3833.23	5006.49	4612.01	3785.37	5169.52	4681.87	3554.09	4478.43	4507.02	3939.69	4287.04	4246.99	4080.64	4600.45	4413.97	3734.67
Q8BH04	Pck2	Phosphoenolpyruvate carboxykinase [GTP], mitochondrial	36	5.54623	4.83031	4.9702	5.41566	4.856	5.74415	5.82279	4.87408	5.19403	6.87549	5.16588	5.56444	7.2768	5.25004	5.42462	5.91335	5.66567	5.61024	2962.64	2580.21	2654.94	2892.89	2593.94	3068.36	3110.37	2603.59	2774.5	3672.69	2759.46	2972.36	3887.06	2804.42	2897.68	3158.74	3026.44	2996.83
Q9Z1Z0	Uso1	General vesicular transport factor p115	36	6.57518	4.96989	4.57038	6.78291	4.99492	4.39313	6.34651	4.88925	3.94747	6.74201	5.31286	5.38236	6.92835	5.5836	5.68595	6.86547	5.08618	4.94358	3727.61	2817.53	2591.05	3845.37	2831.72	2490.56	3597.97	2771.82	2237.9	3822.19	3011.98	3051.38	3927.83	3165.46	3223.49	3892.18	2883.46	2802.62
O35887	Calu	Calumenin	36	7.06762	4.03149	5.46422	7.21515	4.03365	4.98413	6.84235	3.42998	5.25869	7.20668	3.94093	5.29353	7.34622	4.77321	6.39684	7.2238	3.92168	5.56982	4228.25	2411.87	3269.01	4316.51	2413.16	2981.79	4093.48	2052.01	3146.05	4311.44	2357.69	3166.89	4394.93	2855.61	3826.95	4321.69	2346.17	3332.18
Q04447	Ckb	Creatine kinase B-type	36	3.83628	4.56958	4.39921	3.88226	4.95635	4.72075	3.48205	4.79599	4.11618	5.06252	6.54243	7.26237	4.93673	10.6636	8.16825	4.96232	7.42106	6.22208	1548.44	1844.42	1775.66	1567	2000.53	1905.44	1405.46	1935.81	1661.42	2043.39	2640.72	2931.32	1992.61	4304.15	3296.96	2002.95	2995.37	2511.42
Q9QZQ1-2	Afdn	Isoform of Q9QZQ1, Isoform 1 of Afadin	36	4.69836	4.05086	8.197	4.51958	3.50828	8.83836	4.15867	3.30151	7.2534	5.35392	4.20339	8.3293	4.54522	4.66686	7.046	4.99668	4.09324	8.23936	3104.75	2676.87	5416.71	2986.61	2318.32	5840.53	2748.11	2181.69	4793.16	3537.95	2777.66	5504.13	3003.55	3083.94	4656.11	3301.88	2704.88	5444.7
P63242	Eif5a	Eukaryotic translation initiation factor 5A-1	36	5.82808	5.49359	5.66629	5.91838	5.45785	5.07498	5.49909	5.21768	5.48767	5.82297	5.18773	5.41962	5.87242	5.75125	5.51375	5.98024	5.24254	5.56588	3604.72	3397.84	3504.65	3660.57	3375.73	3138.92	3401.24	3227.18	3394.17	3601.56	3208.65	3352.08	3632.15	3557.2	3410.3	3698.83	3242.56	3442.55
Q9D0E1	Hnrnpm	Heterogeneous nuclear ribonucleoprotein M	35	6.78554	6.33288	4.70225	6.94901	6.18927	4.49425	6.60906	5.96785	4.29384	6.27171	5.60182	3.84165	6.40969	5.76975	3.72541	6.10847	5.76968	4.17786	4577.08	4271.75	3171.83	4687.35	4174.88	3031.53	4458.04	4025.52	2896.35	4230.49	3778.63	2591.33	4323.56	3891.9	2512.92	4120.38	3891.85	2818.11
Q8K2B3	Sdha	Succinate dehydrogenase [ubiquinone] flavoprotein subunit, mitochondrial	35	4.00995	6.51457	6.2113	3.82494	6.26551	7.14344	4.59318	6.44859	7.58689	3.81792	6.03791	6.30119	3.90649	4.98156	6.04365	4.02399	5.74023	6.54869	2433.86	3954.05	3769.98	2321.57	3802.89	4335.75	2787.86	3914.01	4604.9	2317.31	3664.74	3824.54	2371.07	3023.58	3668.23	2442.38	3484.07	3974.77
Q9JKR6	Hyou1	Hypoxia up-regulated protein 1	35	5.50408	4.4477	6.17917	5.31107	4.48097	5.95974	5.19785	4.1032	5.36703	5.87043	5.18232	6.86978	6.30877	5.1044	6.93112	5.71228	5.11066	6.35942	3206.72	2591.26	3600.03	3094.27	2610.64	3472.19	3028.31	2390.56	3126.87	3420.16	3019.26	4002.38	3675.54	2973.86	4038.12	3328.01	2977.51	3705.05
Q3V3R1	Mthfd1l	Monofunctional C1-tetrahydrofolate synthase, mitochondrial	35	5.73126	4.36933	6.51802	6.07196	4.35646	6.3149	5.80559	4.42944	6.48633	5.66767	4.25147	6.08833	6.09345	4.46851	5.83421	5.99336	4.97582	6.5439	5166.87	3939.06	5876.16	5474.03	3927.46	5693.04	5233.89	3993.25	5847.6	5109.55	3832.81	5488.78	5493.4	4028.48	5259.69	5403.17	4485.83	5899.49
O08749	Dld	Dihydrolipoyl dehydrogenase, mitochondrial	35	3.99325	7.31077	6.21495	4.07412	7.25519	5.76752	4.22409	6.51225	6.72782	3.76913	6.66332	6.08434	3.80712	5.47981	5.6251	4.09287	6.20131	6.19703	2914.91	5336.57	4536.66	2973.94	5296	4210.06	3083.42	4753.68	4911.04	2751.31	4863.96	4441.33	2779.05	4000.04	4106.1	2987.64	4526.71	4523.58
Q9R118	Htra1	Serine protease HTRA1	35	0.884794	1.51026	12.2692	0.858322	1.06041	11.9105	0.878959	0.726342	11.5855	1.51756	2.24963	15.9292	1.52901	1.91148	16.996	1.22343	2.47918	14.4803	487.106	831.444	6754.57	472.532	583.786	6557.08	483.894	399.874	6378.16	835.466	1238.49	8769.49	841.766	1052.33	9356.84	673.535	1364.86	7971.83
P62897	Cycs	Cytochrome c, somatic	35	3.4739	5.00806	8.61357	3.71408	4.87534	7.9869	3.69901	4.71016	10.6871	3.5004	4.64439	7.80716	3.34364	3.9142	8.20611	3.52814	4.24045	8.04742	1468.43	2116.93	3640.99	1569.96	2060.83	3376.1	1563.59	1991	4517.48	1479.64	1963.2	3300.12	1413.37	1654.55	3468.76	1491.36	1792.45	3401.68
Q8BIJ6	Iars2	Isoleucine--tRNA ligase, mitochondrial	35	4.88481	6.64431	5.47743	4.62078	6.72562	5.77987	4.91133	6.88077	5.57465	4.667	6.37295	5.4307	4.41805	5.94941	5.20192	4.63853	6.19446	5.62742	3079.8	4189.14	3453.44	2913.34	4240.4	3644.12	3096.52	4338.22	3514.73	2942.47	4018.05	3423.97	2785.52	3751.01	3279.73	2924.52	3905.51	3548
Q0KL02	Trio	Triple functional domain protein	35	4.96213	4.95403	6.45617	5.04493	4.7294	6.20933	4.89063	4.93894	6.4148	5.36005	5.02491	7.08835	4.92934	5.46849	6.80978	4.79074	5.18778	6.74019	2344.68	2340.86	3050.64	2383.81	2234.71	2934	2310.9	2333.73	3031.09	2532.7	2374.34	3349.35	2329.19	2583.95	3217.72	2263.7	2451.3	3184.84
A0A1Y7VMN0	Rock2	Isoform of P70336, Rho-associated protein kinase 2 (Fragment)	35	6.92032	4.9275	4.14641	7.0063	4.89567	3.75903	6.2892	4.66727	3.16422	7.41301	5.53227	4.89057	6.98722	6.9947	5.73973	7.18566	5.23571	4.24519	2861.78	2037.69	1714.68	2897.34	2024.52	1554.48	2600.79	1930.07	1308.51	3065.53	2287.78	2022.41	2889.45	2892.54	2373.57	2971.51	2165.14	1755.53
Q8BGQ7	Aars1	Alanine--tRNA ligase, cytoplasmic	35	4.77741	4.35273	6.21852	4.8212	4.39405	6.63993	5.32257	4.4539	6.65297	5.97148	4.67628	6.22057	6.99938	5.59585	6.42224	5.33284	4.92504	6.22303	2709.28	2468.44	3526.53	2734.11	2491.87	3765.51	3018.44	2525.81	3772.91	3386.43	2651.92	3527.69	3969.36	3173.42	3642.06	3024.26	2792.99	3529.09
P41216	Acsl1	Long-chain-fatty-acid--CoA ligase 1	35	1.07493	20.2055	1.05096	0.335729	17.9641	0.901363	0.47391	12.8968	1.07309	0.649439	17.5399	1.26722	0.6857	7.04729	1.22606	0.880262	13.5553	1.17242	780.982	14680.1	763.563	243.921	13051.6	654.877	344.315	9370.08	779.646	471.844	12743.5	920.69	498.189	5120.14	890.779	639.546	9848.5	851.81
Q7TPV4	Mybbp1a	Myb-binding protein 1A	35	4.45162	4.9503	6.98078	4.74369	5.0465	7.16512	4.79218	5.07723	7.3463	4.55872	5.28399	6.63689	4.95396	5.01865	6.61768	4.53867	5.61135	6.22637	1845.64	2052.39	2894.23	1966.73	2092.28	2970.65	1986.83	2105.01	3045.77	1890.04	2190.74	2751.65	2053.91	2080.73	2743.69	1881.73	2326.46	2581.45
Q8C8U0	Ppfibp1	Liprin-beta-1	35	9.23804	3.81209	3.10473	10.1029	4.03426	3.06522	9.8689	4.36912	2.46054	8.81917	4.09167	3.35981	8.66521	4.70343	3.30325	9.39535	4.25577	3.35056	4307.62	1777.55	1447.71	4710.89	1881.14	1429.28	4601.79	2037.29	1147.33	4112.3	1907.91	1566.65	4040.52	2193.17	1540.28	4380.97	1984.43	1562.34
P11983	Tcp1	T-complex protein 1 subunit alpha	35	5.43411	5.24872	5.93286	5.04914	5.38123	6.38232	5.37723	5.49523	5.79866	5.28074	5.33505	6.04356	5.35661	5.33886	6.05448	5.29314	5.27812	5.91996	3356.24	3241.74	3664.28	3118.47	3323.58	3941.88	3321.11	3393.99	3581.4	3261.52	3295.06	3732.65	3308.38	3297.41	3739.4	3269.18	3259.9	3656.31
P25444	Rps2	40S ribosomal protein S2	35	5.6341	5.55834	4.95883	5.24723	5.54996	5.15242	5.92875	5.64567	5.02657	6.14637	6.25947	5.47294	6.08803	5.51755	5.74434	5.6634	5.62362	4.78239	5270.69	5199.82	4638.98	4908.78	5191.98	4820.08	5546.33	5281.51	4702.35	5749.92	5855.72	5119.93	5695.34	5161.66	5373.82	5298.1	5260.89	4473.92
Q99KK7	Dpp3	Dipeptidyl peptidase 3	35	5.35856	4.8581	6.60026	5.36548	4.81572	6.82025	5.29585	4.64493	6.13519	5.15042	4.45798	6.8517	4.98497	5.14325	6.70797	5.2107	4.5892	7.00949	3314.27	3004.73	4082.26	3318.55	2978.52	4218.33	3275.49	2872.89	3794.61	3185.54	2757.26	4237.77	3083.2	3181.1	4148.88	3222.82	2838.42	4335.37
P43406	Itgav	Integrin alpha-V	35	6.56746	4.7265	5.32121	6.75155	4.50567	4.84392	7.27983	5.2924	5.19496	7.23644	4.3899	5.10879	6.44738	4.06493	5.56155	7.07307	4.49052	5.14392	5810.25	4181.55	4707.69	5973.12	3986.18	4285.43	6440.49	4682.2	4595.99	6402.1	3883.76	4519.77	5704.01	3596.26	4920.32	6257.57	3972.78	4550.84
Q9D8W5	Psmd12	26S proteasome non-ATPase regulatory subunit 12	35	5.14185	5.1124	5.58512	5.19221	4.99867	6.44842	5.8146	5.82947	6.48328	5.32167	5.33627	5.79515	5.39348	5.14049	5.61847	5.57113	5.31793	5.8994	2731.3	2715.66	2966.76	2758.05	2655.24	3425.33	3088.66	3096.55	3443.85	2826.82	2834.57	3078.32	2864.96	2730.58	2984.47	2959.33	2824.83	3133.7
O54774	Ap3d1	AP-3 complex subunit delta-1	35	6.3708	5.92179	4.58944	6.29855	6.02613	4.74958	6.34334	6.30245	4.19845	5.96836	5.80029	4.4894	6.07861	5.82081	4.97211	6.09882	5.49705	4.474	3704.05	3442.99	2668.35	3662.04	3503.65	2761.45	3688.09	3664.31	2441.02	3470.07	3372.35	2610.18	3534.17	3384.28	2890.84	3545.92	3196.04	2601.23
Q60902	Eps15l1	Epidermal growth factor receptor substrate 15-like 1	35	6.67842	6.4723	4.39423	6.30404	6.5025	4.20334	6.27077	6.25416	3.99131	6.04724	5.81178	4.39778	6.03635	5.88822	4.41922	6.24554	5.65105	4.43174	4166.95	4038.34	2741.75	3933.35	4057.19	2622.64	3912.6	3902.23	2490.35	3773.13	3626.21	2743.96	3766.33	3673.91	2757.34	3896.86	3525.93	2765.15
P08121	Col3a1	Collagen alpha-1(III) chain	35	4.6886	12.3036	1.06814	3.72736	11.1005	0.743639	3.40296	8.61823	0.46944	2.4885	13.6984	0.82273	2.75655	18.7643	0.911825	1.93731	11.4822	1.01566	2369.9	6219	539.901	1884.03	5610.87	375.88	1720.06	4356.17	237.283	1257.84	6924	415.857	1393.33	9484.61	460.891	979.234	5803.79	513.378
Q62167	Ddx3x	ATP-dependent RNA helicase DDX3X	35	6.52441	5.92149	4.47915	6.72799	5.73393	4.32469	6.38565	5.28011	3.81419	6.47354	5.72834	4.62653	6.77024	5.66734	4.68254	6.43635	5.86462	4.55889	6555.37	5949.59	4500.41	6759.92	5761.14	4345.21	6415.95	5305.17	3832.29	6504.27	5755.52	4648.48	6802.37	5694.24	4704.76	6466.89	5892.45	4580.53
Q8CI94	Pygb	Glycogen phosphorylase, brain form	35	6.90609	8.60317	3.32933	7.82015	9.70496	2.95073	8.53109	13.0276	4.96402	4.14092	5.6493	2.30668	3.56595	4.30215	2.46888	3.88126	5.43621	2.41147	5161.67	6430.08	2488.37	5844.85	7253.57	2205.4	6376.2	9736.96	3710.15	3094.96	4222.34	1724.03	2665.22	3215.46	1845.26	2900.88	4063.07	1802.35
P80313	Cct7	T-complex protein 1 subunit eta	35	5.12627	5.02972	6.03927	5.13478	5.38138	6.24244	5.32201	5.6433	6.10489	5.19729	5.15792	5.95024	5.3916	5.41256	6.24672	5.32195	5.32929	5.96837	3876.44	3803.43	4566.84	3882.87	4069.35	4720.48	4024.46	4267.41	4616.46	3930.14	3900.37	4499.52	4077.08	4092.93	4723.71	4024.41	4029.96	4513.23
Q07113	Igf2r	Cation-independent mannose-6-phosphate receptor	35	5.8588	8.24757	3.04908	4.86451	7.87725	3.44076	5.49203	8.45774	3.04015	5.53588	7.64472	3.99463	5.19986	6.66447	4.55191	5.2459	6.93032	3.90442	5003.33	7043.31	2603.87	4154.22	6727.05	2938.36	4690.11	7222.78	2596.25	4727.56	6528.47	3411.35	4440.6	5691.36	3887.26	4479.92	5918.39	3334.32
P56399	Usp5	Ubiquitin carboxyl-terminal hydrolase 5	35	6.06198	5.6684	5.54558	6.03445	5.57402	5.34979	5.57316	5.14614	4.67097	5.89526	5.39945	5.2794	5.75005	5.77559	5.22157	6.19442	5.25527	5.6045	3850.21	3600.23	3522.22	3832.72	3540.29	3397.87	3539.74	3268.52	2966.73	3744.32	3429.41	3353.16	3652.09	3668.31	3316.43	3934.33	3337.84	3559.65
P50396	Gdi1	Rab GDP dissociation inhibitor alpha	35	6.17754	5.26347	6.37231	5.78836	5.58621	6.32792	5.85772	5.13097	5.7447	5.44788	4.65437	5.56265	5.68843	4.68731	5.43649	5.97529	4.38498	5.91341	3783.32	3223.52	3902.61	3544.98	3421.18	3875.42	3587.46	3142.37	3518.24	3336.45	2850.48	3406.74	3483.77	2870.66	3329.48	3659.46	2685.5	3621.56
Q3V3R4	Itga1	Integrin alpha-1	35	9.51254	6.33501	0.802974	9.56322	7.35054	0.836027	10.5537	8.15229	0.535598	7.17178	6.51181	1.00423	6.44986	7.87365	1.42066	7.79077	6.94383	1.19149	6962.43	4636.73	587.714	6999.53	5380.02	611.906	7724.49	5966.83	392.016	5249.18	4766.13	735.019	4720.79	5762.89	1039.81	5702.23	5082.34	872.075
P80314	Cct2	T-complex protein 1 subunit beta	35	5.21662	5.33444	6.00831	5.10469	5.39652	6.08623	5.14873	5.42525	6.09649	5.1012	5.20444	6.21647	5.29997	5.60953	6.15984	5.1647	5.30288	6.12368	4327.19	4424.93	4983.9	4234.35	4476.42	5048.54	4270.88	4500.26	5057.05	4231.45	4317.09	5156.57	4396.33	4653.11	5109.59	4284.13	4398.75	5079.6
P84078	Arf1	ADP-ribosylation factor 1	35	5.64801	4.58143	6.9002	5.82642	4.75962	6.38095	5.34941	4.58575	5.97026	5.91163	4.65208	6.16361	5.9249	4.56253	6.20129	5.73239	4.5909	6.25862	4953.39	4017.99	6051.58	5109.86	4174.26	5596.19	4691.52	4021.77	5236.01	5184.59	4079.95	5405.58	5196.23	4001.41	5438.62	5027.39	4026.29	5488.91
P12382	Pfkl	ATP-dependent 6-phosphofructokinase, liver type	34	7.24678	4.25207	4.74366	7.40427	4.46889	4.89551	7.31099	4.39698	4.8015	7.3628	4.38454	4.88355	7.56438	4.28503	5.04344	7.64275	4.58117	4.73169	6438.08	3777.56	4214.29	6578	3970.18	4349.2	6495.12	3906.3	4265.68	6541.15	3895.25	4338.57	6720.23	3806.84	4480.62	6789.86	4069.93	4203.66
P47738	Aldh2	Aldehyde dehydrogenase, mitochondrial	34	3.47347	4.42519	7.88514	3.09383	4.52053	9.071	3.53681	4.51737	9.44813	3.79194	4.97925	8.46103	3.82298	4.39449	8.10575	3.74188	4.79875	7.93246	1724.32	2196.78	3914.38	1535.86	2244.1	4503.07	1755.76	2242.54	4690.29	1882.41	2471.82	4200.27	1897.83	2181.54	4023.9	1857.56	2382.22	3937.88
Q8BG32	Psmd11	26S proteasome non-ATPase regulatory subunit 11	34	5.65865	5.64333	5.68923	5.58122	5.6942	5.55984	5.38882	5.31151	5.37927	5.65821	5.73856	5.35323	5.74128	5.51349	5.31685	5.71042	5.63518	5.42671	5011.85	4998.28	5038.93	4943.27	5043.34	4924.33	4772.87	4704.39	4764.41	5011.46	5082.63	4741.34	5085.03	4883.29	4709.12	5057.71	4991.06	4806.42
E9Q634	Myo1e	Unconventional myosin-Ie	34	6.49703	5.28906	6.88986	6.39756	5.23705	7.17895	6.46677	5.70879	7.27873	5.60075	4.59868	4.21092	4.9863	5.01608	3.14352	5.36668	4.82943	5.30386	3316.68	2700.02	3517.21	3265.9	2673.47	3664.79	3301.23	2914.29	3715.73	2859.14	2347.59	2149.64	2545.47	2560.67	1604.74	2739.64	2465.39	2707.58
Q6A065	Cep170	Centrosomal protein of 170 kDa	34	6.24267	5.55647	5.42206	6.05396	5.43503	5.09174	5.71399	5.18141	5.05636	6.16269	5.29622	5.15345	6.52247	5.40376	5.00746	6.15256	5.00045	5.54726	5724	5094.82	4971.58	5550.97	4983.47	4668.7	5239.25	4750.92	4636.26	5650.67	4856.19	4725.28	5980.56	4954.8	4591.43	5641.38	4585	5086.37
A2AN08	Ubr4	E3 ubiquitin-protein ligase UBR4	34	5.5917	5.23683	5.33475	5.64	5.28935	5.43255	5.49197	5.45096	5.31124	5.8778	5.63659	5.79121	5.92008	5.50157	5.3463	5.91459	5.50583	5.72669	2129.92	1994.74	2032.04	2148.32	2014.75	2069.3	2091.93	2076.31	2023.09	2238.89	2147.02	2205.91	2255	2095.59	2036.45	2252.91	2097.21	2181.34
P70168	Kpnb1	Importin subunit beta-1	34	5.93112	5.42307	4.58868	5.45312	5.63553	5.35583	6.15122	5.95951	4.97475	6.14414	6.01954	5.04675	6.13067	6.04594	4.82208	6.12597	5.58561	4.60649	3858.49	3527.98	2985.17	3547.53	3666.19	3484.23	4001.67	3876.96	3236.32	3997.07	3916.01	3283.16	3988.31	3933.19	3137	3985.25	3633.72	2996.75
Q64514	Tpp2	Tripeptidyl-peptidase 2	34	5.40729	5.58316	4.99002	5.35701	5.58249	5.31038	5.92849	5.77691	5.08968	5.76229	5.60291	5.87833	5.77076	5.66192	5.80263	5.6847	5.53973	5.27129	2665.48	2752.18	2459.79	2640.69	2751.85	2617.71	2922.41	2847.69	2508.92	2840.48	2761.91	2897.68	2844.65	2791	2860.36	2802.23	2730.77	2598.44
Q922B2	Dars1	Aspartate--tRNA ligase, cytoplasmic	34	5.5684	5.38065	5.35252	5.49986	5.68623	5.35026	5.72271	5.72238	4.83743	5.5713	5.66663	5.46543	5.99122	5.52461	5.60443	5.90201	5.82027	5.33368	2256	2179.93	2168.53	2228.23	2303.73	2167.62	2318.51	2318.38	1959.85	2257.17	2295.79	2214.28	2427.3	2238.25	2270.59	2391.16	2358.04	2160.9
P14206	Rpsa	40S ribosomal protein SA	34	5.4218	5.37488	5.53087	5.97101	5.73843	4.87973	5.21599	5.4887	5.0545	6.08398	6.10465	5.54336	5.93753	5.44605	5.69188	5.5867	5.84088	5.08904	2909.84	2884.66	2968.38	3204.6	3079.78	2618.92	2799.39	2945.75	2712.71	3265.23	3276.32	2975.08	3186.63	2922.86	3054.79	2998.34	3134.76	2731.25
D4AFX7	Dnajc13	DnaJ heat shock protein family (Hsp40) member C13	34	5.59498	5.2765	6.07292	5.11281	4.84199	6.29732	4.87002	4.82575	4.8229	5.51764	5.34246	6.48632	5.79147	5.75946	6.21825	5.77783	5.07884	6.31253	2551.68	2406.43	2769.65	2331.78	2208.27	2871.99	2221.05	2200.86	2199.56	2516.41	2436.51	2958.19	2641.29	2626.69	2835.93	2635.07	2316.29	2878.93
P05202	Got2	Aspartate aminotransferase, mitochondrial	34	2.84051	3.08207	6.50763	2.93804	3.87468	10.9931	5.5815	6.09457	12.6688	3.08641	3.75153	7.29363	3.08741	3.68141	7.74685	3.23135	3.9783	9.5622	2895.58	3141.82	6633.78	2995	3949.79	11206.2	5689.71	6212.72	12914.4	3146.24	3824.26	7435.02	3147.27	3752.78	7897.03	3293.99	4055.42	9747.58
Q6GQT9	Nomo1	Nodal modulator 1	34	4.82172	4.37564	7.1443	4.76023	4.54269	6.94641	4.83483	4.25065	6.51449	4.7293	4.83469	7.45455	4.99125	4.62052	7.87357	4.98154	4.86887	7.45476	2423.44	2199.24	3590.8	2392.54	2283.2	3491.34	2430.03	2136.42	3274.25	2376.99	2429.96	3746.73	2508.65	2322.32	3957.33	2503.77	2447.14	3746.84
Q921H8	Acaa1a	3-ketoacyl-CoA thiolase A, peroxisomal	34	4.39693	8.20761	5.27047	4.09789	7.91639	5.09439	4.1284	6.80959	4.91631	4.39387	7.31832	5.22045	4.39837	6.11355	5.29315	4.3561	6.77919	5.28903	2125.35	3967.33	2547.6	1980.81	3826.57	2462.49	1995.55	3291.57	2376.41	2123.88	3537.47	2523.42	2126.05	2955.12	2558.56	2105.62	3276.87	2556.57
Q9Z110	Aldh18a1	Delta-1-pyrroline-5-carboxylate synthase	34	3.98603	2.51369	9.6984	4.08436	2.28547	9.49783	3.9335	2.10244	10.155	4.44252	2.96557	9.71002	5.10291	3.25654	9.06939	4.51126	3.6277	9.05735	1749.08	1103.01	4255.67	1792.22	1002.87	4167.66	1726.02	922.554	4456.03	1949.38	1301.3	4260.77	2239.16	1428.97	3979.66	1979.55	1591.84	3974.38
Q9EQH3	Vps35	Vacuolar protein sorting-associated protein 35	34	5.86157	5.63457	5.26418	5.58593	5.97694	5.17192	5.60059	5.90584	5.4044	5.95345	6.03762	5.20095	5.57355	5.51541	5.42411	5.65193	5.42847	4.80856	2413.96	2320.47	2167.94	2300.44	2461.47	2129.94	2306.48	2432.19	2225.68	2451.8	2486.46	2141.9	2295.34	2271.4	2233.8	2327.62	2235.59	1980.3
P68040	Rack1	Receptor of activated protein C kinase 1	34	5.45364	5.43334	5.40585	5.68664	5.46307	5.33276	6.2225	5.96759	6.60415	5.40155	5.33544	5.10855	5.79136	5.38253	5.40836	5.53217	5.53264	4.93787	3139.98	3128.29	3112.46	3274.13	3145.41	3070.38	3582.66	3435.89	3802.39	3109.99	3071.92	2941.29	3334.42	3099.03	3113.91	3185.19	3185.46	2843.02
Q921M3	Sf3b3	Splicing factor 3B subunit 3	34	5.80928	5.73583	4.64602	5.76912	5.71739	5.54074	6.94651	6.94907	5.72025	5.78919	6.08134	4.37701	5.96824	5.33959	3.98287	5.86097	5.33301	4.43359	2602.05	2569.15	2081.01	2584.06	2560.89	2481.76	3111.43	3112.58	2562.17	2593.05	2723.91	1960.52	2673.25	2391.67	1783.98	2625.2	2388.72	1985.86
A0A0R4J2D3	Mia3	Isoform of Q8BI84, Transport and Golgi organization protein 1 homolog	34	6.27974	5.30653	5.34336	6.10815	4.91247	4.70121	5.53396	4.31651	3.90566	6.89447	5.4889	5.63361	7.22744	5.56285	5.62932	6.6443	5.16987	5.34165	4869.9	4115.18	4143.74	4736.83	3809.59	3645.76	4291.56	3347.43	3028.81	5346.62	4256.61	4368.83	5604.84	4313.96	4365.51	5152.62	4009.2	4142.42
Q8BSY0	Asph	Aspartyl/asparaginyl beta-hydroxylase	34	5.17292	3.73341	6.67855	5.02968	3.59353	6.48003	4.58946	3.25433	6.13792	6.27856	4.41598	7.7621	6.21611	4.49185	8.50553	6.04051	4.37786	7.24167	4239.44	3059.7	5473.37	4122.05	2945.06	5310.67	3761.27	2667.07	5030.3	5145.56	3619.1	6361.39	5094.38	3681.27	6970.66	4950.47	3587.86	5934.87
Q6P5F9	Xpo1	Exportin-1	34	5.86527	6.04891	5.27921	5.91742	6.33998	5.2272	5.78677	6.23181	5.29724	5.44639	5.72775	4.86273	5.5966	5.4509	4.83085	5.66931	5.43491	4.98677	4145.13	4274.91	3730.95	4181.99	4480.62	3694.19	4089.65	4404.18	3743.69	3849.1	4047.94	3436.61	3955.26	3852.28	3414.08	4006.64	3840.98	3524.27
E9Q555	Rnf213	E3 ubiquitin-protein ligase RNF213	34	7.15475	4.95216	3.3731	5.73834	5.12812	2.70603	5.09913	4.66031	2.09217	9.21782	6.9251	3.11504	9.24827	8.46402	4.10501	7.38241	7.48569	3.15253	2751.27	1904.29	1297.08	2206.61	1971.95	1040.57	1960.81	1792.06	804.518	3544.6	2662.96	1197.85	3556.31	3254.73	1578.53	2838.81	2878.53	1212.27
Q810B6	Ankfy1	Rabankyrin-5	34	6.28298	5.7149	4.67361	6.13036	5.46501	4.9657	6.39706	5.80917	4.3346	6.43807	5.56215	4.39535	6.37049	5.89513	4.77418	6.34728	5.75723	4.68674	4002.09	3640.24	2976.97	3904.88	3481.07	3163.03	4074.76	3700.29	2761.03	4100.89	3542.94	2799.72	4057.84	3755.05	3041.03	4043.05	3667.21	2985.33
P46735	Myo1b	Unconventional myosin-Ib	34	5.0401	3.53799	8.96952	4.93637	2.91605	9.22399	4.80453	3.02318	8.43962	5.54047	3.09945	7.75031	5.64477	3.39895	7.17863	5.32324	3.17976	7.99306	3658.67	2568.27	6511.08	3583.37	2116.8	6695.8	3487.66	2194.56	6126.42	4021.89	2249.92	5626.04	4097.61	2467.34	5211.05	3864.2	2308.23	5802.26
Q9DBG6	Rpn2	Dolichyl-diphosphooligosaccharide--protein glycosyltransferase subunit 2	34	5.92399	4.95351	5.82712	5.95985	5.06568	5.13538	5.91436	4.93762	5.34361	5.68549	5.10538	5.91394	6.0639	4.98522	6.02122	6.15691	4.86909	6.13774	3865.14	3231.94	3801.94	3888.54	3305.13	3350.61	3858.86	3221.58	3486.47	3709.53	3331.03	3858.58	3956.42	3252.63	3928.58	4017.11	3176.87	4004.6
Q00612	G6pdx	Glucose-6-phosphate 1-dehydrogenase X	34	4.33219	7.5182	5.71864	3.96377	7.43305	5.90438	4.65169	7.0261	6.46259	4.00497	6.88914	5.4206	4.02631	4.76284	6.17101	4.28052	6.11237	5.32164	2202.4	3822.11	2907.24	2015.1	3778.82	3001.67	2364.83	3571.93	3285.45	2036.05	3502.3	2755.72	2046.9	2421.33	3137.22	2176.13	3107.41	2705.42
P28271	Aco1	Cytoplasmic aconitate hydratase	34	4.24982	11.4493	3.75027	3.78539	11.0742	3.54934	4.12634	9.33097	3.77127	3.75235	9.27846	3.64679	3.68385	5.56352	3.80882	3.83304	7.7448	3.6014	2341.83	6309.05	2066.55	2085.91	6102.37	1955.83	2273.78	5141.75	2078.13	2067.7	5112.82	2009.53	2029.95	3065.73	2098.82	2112.16	4267.71	1984.52
Q5SYD0	Myo1d	Unconventional myosin-Id	34	11.1526	3.35182	3.5847	11.2636	3.1041	3.33379	11.1	3.3746	2.54146	9.35364	2.64376	4.3712	7.7839	2.24639	4.94947	9.24261	2.80869	3.79362	10166.9	3055.59	3267.88	10268.2	2829.76	3039.15	10119	3076.35	2316.85	8526.97	2410.1	3984.88	7095.97	2047.85	4512.04	8425.75	2560.46	3458.34
Q8QZT1	Acat1	Acetyl-CoA acetyltransferase, mitochondrial	34	4.8199	8.37864	5.3817	4.52965	8.27714	5.26111	5.26094	7.94513	5.95954	4.06091	6.87103	4.50935	3.90675	5.38782	4.30458	4.3126	6.23158	4.60163	3696.22	6425.29	4127.04	3473.63	6347.46	4034.57	4034.44	6092.85	4570.17	3114.17	5269.16	3458.07	2995.96	4131.73	3301.04	3307.19	4778.78	3528.83
Q9DCN2	Cyb5r3	NADH-cytochrome b5 reductase 3	34	6.19243	4.98968	5.18789	6.2935	5.07532	5.16218	6.89335	5.58932	5.28573	6.54549	5.51967	4.98099	5.80808	5.30309	5.08966	6.04798	5.16516	4.87046	3621.64	2918.21	3034.13	3680.75	2968.3	3019.09	4031.57	3268.91	3091.35	3828.12	3228.17	2913.13	3396.85	3101.51	2976.68	3537.15	3020.84	2848.49
Q05816	Fabp5	Fatty acid-binding protein 5	34	1.58763	6.46149	6.25678	1.04774	6.24615	14.1399	3.00469	10.037	18.1347	1.69668	5.82108	3.76788	2.10387	4.07633	2.68542	1.95105	5.21485	5.76688	1130.11	4599.45	4453.74	745.808	4446.18	10065.1	2138.82	7144.57	12908.7	1207.74	4143.6	2682.07	1497.59	2901.64	1911.55	1388.81	3712.07	4105.02
Q91VA7	Idh3b	Isocitrate dehydrogenase [NAD] subunit, mitochondrial	33	3.29165	5.76548	8.04284	3.10153	5.37921	8.50583	3.39208	4.99763	8.46531	3.18708	5.35179	8.01233	3.17496	4.45883	8.67315	3.26619	5.14322	7.7909	3277.58	5740.85	8008.47	3088.28	5356.22	8469.49	3377.58	4976.28	8429.13	3173.46	5328.93	7978.09	3161.4	4439.78	8636.09	3252.24	5121.24	7757.61
Q9QZE5	Copg1	Coatomer subunit gamma-1	33	5.96604	4.29162	5.17951	5.97436	4.67514	5.96934	8.15925	6.08071	6.66741	6.32228	4.46496	4.97627	6.33831	4.46823	5.34552	6.07229	4.3785	4.67028	2595.85	1867.3	2253.63	2599.47	2034.17	2597.29	3550.13	2645.74	2901.02	2750.85	1942.72	2165.2	2757.83	1944.15	2325.86	2642.08	1905.11	2032.06
P58771-2	Tpm1	Isoform of P58771, Isoform 2 of Tropomyosin alpha-1 chain	33	5.10391	4.76147	5.06432	5.07976	4.83704	5.69782	6.36699	6.49499	8.33378	5.17293	4.63529	5.82669	5.23326	5.84537	6.56138	5.02015	4.68863	5.2762	2143.78	1999.94	2127.15	2133.63	2031.68	2393.24	2674.3	2728.07	3500.41	2172.77	1946.95	2447.37	2198.11	2455.21	2755.95	2108.6	1969.35	2216.14
P17426	Ap2a1	AP-2 complex subunit alpha-1	33	5.49728	4.31536	4.4443	5.78334	4.96995	6.90771	8.98674	7.57253	7.25002	5.43662	4.91138	4.7491	5.19929	4.74461	4.7286	5.46201	4.58616	4.455	4186.25	3286.2	3384.39	4404.08	3784.68	5260.31	6843.51	5766.57	5520.98	4140.05	3740.07	3616.5	3959.32	3613.08	3600.88	4159.39	3492.42	3392.54
E9QNN1	Dhx9	Isoform of O70133, DEAH box protein 9	33	5.72708	5.6517	6.16298	5.60158	5.35339	6.23548	5.77581	5.46972	5.54832	5.25988	5.19689	5.8022	5.60541	5.14643	5.29266	5.5305	5.06572	5.57426	5210.45	5141.87	5607.03	5096.27	4870.47	5672.99	5254.79	4976.31	5047.81	4785.4	4728.09	5278.79	5099.76	4682.18	4815.22	5031.6	4608.75	5071.41
Q6PDI5	Ecpas	Proteasome adapter and scaffold protein ECM29	33	6.00684	5.91295	4.87241	6.12505	6.04224	4.71115	6.02117	6.00986	4.52404	5.83464	5.78211	4.73934	5.98304	5.84049	4.88248	6.02977	6.04737	4.63505	4529.03	4458.23	3673.69	4618.15	4555.71	3552.1	4539.83	4531.3	3411.03	4399.19	4359.59	3573.36	4511.08	4403.6	3681.28	4546.31	4559.58	3494.73
Q61595-13	Ktn1	Isoform of Q61595, Isoform 13 of Kinectin	33	5.19971	4.97425	5.11048	5.42883	4.72904	5.42327	4.92137	4.7061	4.44266	6.3218	5.99982	6.4258	6.03938	6.66361	5.45342	6.16847	5.84468	6.1473	2780.78	2660.2	2733.06	2903.31	2529.07	2900.33	2631.92	2516.8	2375.91	3380.87	3208.67	3436.48	3229.83	3563.66	2916.46	3298.86	3125.7	3287.54
Q9D0K2	Oxct1	Succinyl-CoA:3-ketoacid coenzyme A transferase 1, mitochondrial	33	3.93904	8.46407	5.31574	3.33291	7.89731	6.05634	3.72945	6.91636	5.51145	4.05206	7.53651	5.63903	3.85143	5.77182	6.0331	3.99969	6.57002	5.38366	3945.67	8478.33	5324.69	3338.53	7910.6	6066.54	3735.73	6928.01	5520.73	4058.88	7549.21	5648.53	3857.92	5781.54	6043.26	4006.43	6581.09	5392.73
P46460	Nsf	Vesicle-fusing ATPase	33	4.75166	4.39349	7.88038	4.61692	4.42923	7.26642	4.57783	4.39002	7.42839	4.43383	4.31751	7.87808	4.50024	4.26997	8.80224	4.49207	4.43894	7.13278	2511.52	2322.21	4165.23	2440.3	2341.1	3840.72	2419.64	2320.37	3926.32	2343.53	2282.05	4164.01	2378.63	2256.92	4652.48	2374.31	2346.23	3770.07
Q5SSZ5	Tns3	Tensin-3	33	8.71986	7.18368	1.35451	8.84596	7.53965	1.34158	9.14748	9.0634	0.7326	7.14977	6.06656	1.76002	6.34874	6.63403	1.93525	7.54339	6.79958	1.83395	3193.66	2631.03	496.09	3239.85	2761.41	491.354	3350.28	3319.49	268.316	2618.62	2221.89	644.612	2325.24	2429.72	708.789	2762.78	2490.36	671.687
Q9CU62	Smc1a	Structural maintenance of chromosomes protein 1A	33	6.18204	6.3512	5.24503	6.0896	6.35931	5.10075	5.95217	6.28313	4.48589	5.95435	6.01977	4.16768	5.91246	6.19161	3.94571	5.73686	5.61917	4.40328	3101.85	3186.73	2631.7	3055.47	3190.79	2559.31	2986.51	3152.57	2250.8	2987.61	3020.43	2091.14	2966.59	3106.65	1979.77	2878.48	2819.43	2209.35
P13541	Myh3	Myosin-3	33	1.1316	1.5395	1.67989	2.62842	2.88201	3.23023	1.61198	1.99604	2.14269	7.13332	9.76928	10.6063	6.8782	12.9365	7.14852	7.00694	11.3533	8.32522	982.443	1336.57	1458.46	2281.96	2502.13	2804.44	1399.5	1732.94	1860.26	6193.07	8481.57	9208.26	5971.58	11231.4	6206.26	6083.34	9856.84	7227.86
E9Q718	Plod2	Isoform of Q9R0B9, Procollagen-lysine 5-dioxygenase	33	7.28899	9.48849	2.61308	6.60447	8.69739	2.4271	6.8261	6.55182	2.68771	6.26788	9.05411	2.31623	6.5229	3.97399	2.03937	6.88986	7.14283	2.60768	4907.11	6387.86	1759.18	4446.28	5855.27	1633.97	4595.48	4410.83	1809.43	4219.68	6095.43	1559.34	4391.36	2675.38	1372.95	4638.41	4808.71	1755.55
P42208	Septin2	Septin-2	33	7.02633	5.5621	4.42335	7.37163	5.85647	4.08497	7.02357	5.77025	4.03011	7.073	5.41596	3.92981	6.47816	5.82801	3.87163	6.94086	5.34824	3.96556	2604.84	2062.01	1639.85	2732.85	2171.14	1514.4	2603.82	2139.18	1494.07	2622.14	2007.84	1456.88	2401.62	2160.59	1435.31	2573.15	1982.73	1470.13
Q9R1P4	Psma1	Proteasome subunit alpha type-1	33	5.49605	5.7091	5.72486	5.36518	5.4675	5.88328	5.06569	5.24514	5.492	5.60202	5.61631	5.70655	5.41845	5.65642	5.4459	5.58617	5.53233	5.98704	4741.71	4925.53	4939.12	4628.8	4717.08	5075.8	4370.42	4525.24	4738.22	4833.14	4845.47	4923.32	4674.77	4880.07	4698.44	4819.47	4773.01	5165.31
Q8BKG3	Ptk7	Inactive tyrosine-protein kinase 7	33	4.56318	3.3207	6.81512	4.56731	3.40347	7.74858	5.13485	3.82105	7.61021	5.35886	3.16014	8.57	6.22079	3.70367	10.1762	4.82591	3.16689	7.83304	2837.48	2064.88	4237.79	2840.06	2116.35	4818.23	3192.96	2376.01	4732.2	3332.25	1965.04	5329.01	3868.23	2303.03	6327.79	3000.86	1969.24	4870.76
Q00519	Xdh	Xanthine dehydrogenase/oxidase	33	1.50321	1.6455	9.70007	1.47954	1.69754	15.1862	2.66626	1.96683	17.8381	1.97248	1.97673	10.4338	2.88613	2.8595	12.2332	2.15353	2.06846	9.73298	1050.55	1150	6779.14	1034.01	1186.37	10613.3	1863.38	1374.57	12466.6	1378.52	1381.48	7291.91	2017.04	1998.43	8549.45	1505.05	1445.59	6802.14
Q8K4L3	Svil	Supervillin	33	4.52997	5.90258	6.37819	4.48926	6.12045	5.21528	4.48314	6.19931	5.19474	5.09381	6.53896	5.4137	5.20182	7.97579	4.71147	4.79024	6.50227	5.25902	2898.75	3777.09	4081.43	2872.7	3916.5	3337.28	2868.78	3966.97	3324.14	3259.55	4184.31	3464.25	3328.67	5103.74	3014.89	3065.29	4160.83	3365.27
Q8R429	Atp2a1	Sarcoplasmic/endoplasmic reticulum calcium ATPase 1	33	1.62143	2.22729	1.25211	3.60238	5.11935	2.19609	2.50985	4.31414	1.62271	8.64992	13.4422	3.26046	5.75616	14.1588	2.79711	8.19254	15.2964	3.98107	1308.13	1796.92	1010.17	2906.3	4130.16	1771.75	2024.88	3480.53	1309.16	6978.53	10844.8	2630.45	4643.92	11422.9	2256.63	6609.53	12340.7	3211.82
Q9JI91	Actn2	Alpha-actinin-2	33	2.99748	2.89478	2.84722	3.89191	4.01478	4.09328	3.19094	3.54543	2.90809	5.53174	9.28644	9.38891	5.27615	10.8847	6.62765	5.48792	9.65586	7.47674	1721.22	1662.25	1634.94	2234.83	2305.38	2350.46	1832.31	2035.87	1669.89	3176.45	5332.49	5391.33	3029.68	6250.23	3805.75	3151.29	5544.61	4293.31
Q9QYR6	Map1a	Microtubule-associated protein 1A	33	7.91885	5.38473	4.20039	7.57672	4.71584	3.60135	6.77111	4.29086	3.11127	7.7136	5.131	4.73633	7.48379	5.42198	4.60365	7.68853	5.02161	4.62839	3099.92	2107.91	1644.29	2965.99	1846.07	1409.79	2650.63	1679.7	1217.94	3019.57	2008.59	1854.09	2929.61	2122.5	1802.15	3009.76	1965.77	1811.84
P70227	Itpr3	Inositol 1,4,5-trisphosphate receptor type 3	33	8.40943	6.68494	3.79904	7.98495	6.46175	4.34463	8.00357	6.5703	4.02189	6.88077	5.5977	2.60656	5.957	4.62058	2.11705	6.93003	5.57946	3.43036	5036.91	4004.01	2275.47	4782.66	3870.33	2602.26	4793.82	3935.35	2408.95	4121.3	3352.8	1561.22	3568	2767.54	1268.02	4150.8	3341.87	2054.65
P24527	Lta4h	Leukotriene A-4 hydrolase	33	5.49405	4.53665	7.26443	5.31088	4.5037	6.80181	5.28336	4.35134	6.70679	5.08091	4.28432	7.04473	5.14955	4.43375	7.22997	5.2035	4.18946	7.1308	4037.2	3333.67	5338.13	3902.6	3309.46	4998.18	3882.38	3197.5	4928.36	3733.61	3148.25	5176.69	3784.05	3258.06	5312.81	3823.7	3078.55	5239.93
O88844	Idh1	Isocitrate dehydrogenase [NADP] cytoplasmic	33	4.49598	11.1319	3.78251	4.22035	11.028	3.29419	4.29278	10.2935	4.25094	3.77866	8.86486	3.01466	3.62695	6.14421	2.98505	3.66344	7.84343	3.28868	3137.04	7767.16	2639.21	2944.71	7694.67	2298.49	2995.26	7182.21	2966.06	2636.53	6185.39	2103.45	2530.67	4287.08	2082.79	2556.13	5472.69	2294.65
Q60598	Cttn	Src substrate cortactin	33	7.36665	5.7023	4.6332	7.19423	5.64868	4.38988	6.67335	5.40144	4.46636	6.70411	4.85896	4.40576	6.50183	5.38896	4.44308	6.90153	4.79092	4.52875	7638.53	5912.75	4804.19	7459.74	5857.15	4551.89	6919.64	5600.78	4631.2	6951.53	5038.28	4568.36	6741.78	5587.85	4607.06	7156.24	4967.74	4695.89
Q91ZJ5	Ugp2	UTP--glucose-1-phosphate uridylyltransferase	33	6.36988	6.38389	4.01897	6.28691	6.61514	4.17884	5.82436	6.65384	3.70441	5.95057	6.03342	4.86515	5.58381	5.9343	4.78492	6.14855	5.95173	4.71131	5608.26	5620.6	3538.44	5535.21	5824.19	3679.19	5127.97	5858.27	3261.49	5239.09	5312.03	4283.44	4916.18	5224.76	4212.81	5413.4	5240.11	4148
Q62523	Zyx	Zyxin	33	7.41405	3.78253	3.76289	9.10703	3.90102	3.52129	7.9523	4.32807	4.86208	7.8244	3.21323	4.82347	9.14308	4.55674	5.33069	8.38804	3.49091	4.59819	4181.67	2133.42	2122.35	5136.55	2200.25	1986.08	4485.26	2441.12	2742.31	4413.12	1812.33	2720.53	5156.88	2570.09	3006.61	4731.02	1968.94	2593.47
G3XA17	Eif4g2	Isoform of Q62448, Eukaryotic translation initiation factor 4 gamma 2	33	5.30751	5.52957	6.0963	5.55228	5.45832	5.97634	5.42109	5.18781	5.84154	5.32309	5.44186	5.47768	5.79417	5.50323	5.33408	5.46994	5.60161	5.68359	2425.06	2526.53	2785.47	2536.91	2493.97	2730.66	2476.96	2370.37	2669.07	2432.18	2486.45	2502.82	2647.43	2514.49	2437.21	2499.28	2559.45	2596.9
P35486	Pdha1	Pyruvate dehydrogenase E1 component subunit alpha, somatic form, mitochondrial	32	3.73818	6.46818	5.94139	3.47697	6.77901	7.05384	4.42106	6.93732	7.45237	3.52455	6.61788	6.4904	3.54627	5.21245	6.07902	3.65763	6.38922	6.21429	1609.45	2784.84	2558.04	1496.99	2918.67	3037	1903.47	2986.83	3208.58	1517.48	2849.3	2794.41	1526.83	2244.19	2617.29	1574.77	2750.85	2675.53
Q9CPV4	Glod4	Glyoxalase domain-containing protein 4	32	6.84069	5.75711	4.51428	6.63326	5.74075	4.67293	6.67692	5.64448	4.37979	6.5895	5.17163	4.30791	6.20112	5.6375	4.34562	6.83467	5.34846	4.7034	3729.21	3138.5	2460.96	3616.13	3129.58	2547.46	3639.94	3077.09	2387.65	3592.27	2819.32	2348.46	3380.55	3073.29	2369.02	3725.93	2915.72	2564.07
S4R1P5	Dst	Isoform of Q91ZU6, Dystonin	32	5.77775	4.2968	4.38629	6.57748	4.56373	4.94019	6.01175	4.10852	4.19199	6.90253	5.97094	6.39825	6.48037	5.98011	5.23126	6.62055	5.95024	5.61125	2765.94	2056.98	2099.82	3148.79	2184.77	2364.98	2877.97	1966.85	2006.8	3304.41	2858.43	3062.99	3102.3	2862.82	2504.33	3169.41	2848.52	2686.24
P28660	Nckap1	Nck-associated protein 1	32	6.89019	5.54901	4.90481	6.69999	5.3922	5.05428	6.59218	5.43042	4.08989	6.51473	5.16482	4.60538	6.53298	5.37618	4.45763	6.80104	5.09854	4.84576	3037.29	2446.08	2162.11	2953.45	2376.96	2228	2905.92	2393.8	1802.88	2871.78	2276.73	2030.11	2879.83	2369.89	1964.99	2997.99	2247.51	2136.08
Q922J3	Clip1	CAP-Gly domain-containing linker protein 1	32	7.70881	5.26467	3.93051	7.41674	4.89549	3.9569	7.00343	4.86386	3.40543	7.32582	5.26687	4.05296	7.19275	6.16568	3.75165	7.71544	5.34986	4.73313	6056.99	4136.58	3088.3	5827.51	3846.5	3109.03	5502.77	3821.65	2675.73	5756.07	4138.31	3184.51	5651.52	4844.52	2947.76	6062.2	4203.51	3718.93
P26043	Rdx	Radixin	32	5.97179	6.04847	5.30944	5.69407	5.93085	5.30786	5.61559	6.08699	5.11553	5.51909	5.55679	5.19057	5.61866	5.70779	5.46136	5.58281	5.06623	5.21613	2367.46	2397.86	2104.88	2257.36	2351.23	2104.25	2226.25	2413.13	2028.01	2188	2202.94	2057.76	2227.47	2262.8	2165.11	2213.25	2008.46	2067.89
Q6PDG5	Smarcc2	SWI/SNF complex subunit SMARCC2	32	6.82532	5.88504	4.95456	6.59146	6.30765	4.68687	6.72298	6.22946	4.94265	5.91145	5.80767	3.95235	6.1989	5.68954	3.81696	5.86586	5.36927	4.242	3773.58	3253.72	2739.28	3644.28	3487.37	2591.27	3717	3444.14	2732.69	3268.32	3210.94	2185.17	3427.25	3145.63	2110.32	3243.12	2968.56	2345.32
Q9CWF2	Tubb2b	Tubulin beta-2B chain	32	6.07591	5.41636	5.31029	5.72814	5.28026	5.81558	7.00395	5.95056	7.7963	5.65628	4.77234	5.33967	5.596	4.87475	4.62048	5.42038	4.82873	4.51402	2899.16	2584.45	2533.84	2733.21	2519.51	2774.94	3341.97	2839.34	3720.05	2698.93	2277.15	2547.85	2670.17	2326.02	2204.69	2586.37	2304.06	2153.89
Q9D0I9	Rars1	Arginine--tRNA ligase, cytoplasmic	32	4.99719	5.72507	5.63256	4.99591	5.49626	5.59752	6.18971	5.89643	8.03852	5.15965	5.26678	5.85926	5.17379	4.85624	6.02884	4.92036	4.87701	5.28889	3309.9	3792.01	3730.74	3309.05	3640.46	3707.53	4099.77	3905.51	5324.33	3417.5	3488.46	3880.89	3426.87	3216.54	3993.22	3259.01	3230.3	3503.11
P51660	Hsd17b4	Peroxisomal multifunctional enzyme type 2	32	3.70052	6.51746	5.5803	3.95382	7.06689	6.73641	5.20905	9.22011	8.67396	3.59335	6.29833	5.24011	3.8409	4.95566	4.86632	3.76844	5.73793	5.04043	2111.82	3719.4	3184.58	2256.38	4032.95	3844.35	2972.71	5261.75	4950.08	2050.66	3594.35	2990.44	2191.94	2828.11	2777.12	2150.58	3274.53	2876.49
Q8VDP4	Ccar2	Cell cycle and apoptosis regulator protein 2	32	6.00608	5.58287	5.95523	6.00546	5.36203	6.02846	5.64688	5.00868	5.43833	5.74137	5.22025	5.234	5.82312	5.67528	4.63371	5.67854	5.31552	5.64417	4941.5	4593.3	4899.67	4940.99	4411.61	4959.91	4645.97	4120.89	4474.39	4723.71	4294.96	4306.28	4790.97	4669.33	3812.39	4672.01	4373.34	4643.74
Q8CI51	Pdlim5	PDZ and LIM domain protein 5	32	6.82645	5.17396	4.13459	7.37205	5.46846	3.78536	7.27792	5.89114	3.55251	6.40651	5.25549	4.89548	5.96369	6.49272	6.30099	5.88063	5.3869	3.93515	3618.12	2742.27	2191.4	3907.3	2898.37	2006.3	3857.4	3122.39	1882.88	3395.54	2785.49	2594.68	3160.85	3441.24	3339.62	3116.82	2855.14	2085.69
P62908	Rps3	40S ribosomal protein S3	32	5.60803	5.59529	5.32794	5.49722	5.60386	5.37114	5.59399	5.39387	4.94959	5.66765	5.58406	5.66406	6.04149	5.80927	5.79211	5.62674	5.64657	5.22713	4787.41	4776.54	4548.31	4692.81	4783.86	4585.19	4775.43	4604.59	4225.33	4838.31	4766.95	4835.24	5157.44	4959.21	4944.56	4803.38	4820.32	4462.25
P32020	Scp2	Sterol carrier protein 2	32	3.47156	13.135	3.26079	2.81905	12.4791	2.7803	2.85069	9.82671	3.47875	3.329	11.1684	2.75009	3.69223	6.58693	2.8901	3.5445	9.09149	2.84528	3199.43	12105.4	3005.18	2598.07	11500.9	2562.36	2627.23	9056.41	3206.05	3068.04	10292.9	2534.52	3402.8	6070.59	2663.54	3266.65	8378.81	2622.24
Q7TMK9	Syncrip	Heterogeneous nuclear ribonucleoprotein Q	32	5.74092	6.79842	4.32842	5.71547	6.99413	4.51029	6.05603	6.74814	4.52738	5.60967	6.62029	4.1739	5.9591	6.22695	4.13766	5.61522	6.14134	4.09667	4950.59	5862.5	3732.54	4928.63	6031.27	3889.37	5222.31	5819.14	3904.1	4837.4	5708.89	3599.29	5138.73	5369.71	3568.04	4842.19	5295.88	3532.69
A0A0J9YUD5	Nup205	Nucleoporin 205	32	5.81539	5.63828	5.68027	5.95166	5.64056	5.99092	5.69136	5.31711	5.20786	5.62439	5.60072	5.12284	5.74452	5.43793	4.95194	5.56404	5.8823	5.13789	2329.38	2258.44	2275.26	2383.96	2259.35	2399.69	2279.7	2129.79	2086.03	2252.87	2243.39	2051.97	2300.99	2178.19	1983.52	2228.7	2356.18	2058
Q8BY87	Usp47	Ubiquitin carboxyl-terminal hydrolase 47	32	6.71486	4.77133	4.06656	7.05911	4.76901	4.18295	7.01169	4.90168	3.72254	7.49788	5.1303	4.7308	7.87772	5.31669	4.38309	7.60996	5.32947	4.92435	3363.05	2389.66	2036.68	3535.46	2388.5	2094.98	3511.71	2454.94	1864.38	3755.21	2569.44	2369.36	3945.45	2662.8	2195.21	3811.35	2669.19	2466.3
Q61576	Fkbp10	Peptidyl-prolyl cis-trans isomerase FKBP10	32	6.87321	4.11227	5.49872	7.73408	4.35603	4.34986	7.46269	4.29862	5.10007	7.13064	4.00466	4.76799	7.61275	4.58072	6.36848	6.67141	4.13106	4.94675	3554.86	2126.89	2843.97	4000.11	2252.96	2249.77	3859.75	2223.27	2637.78	3688.01	2071.23	2466.03	3937.36	2369.18	3293.81	3450.49	2136.61	2558.49
Q8C7R4	Uba6	Ubiquitin-like modifier-activating enzyme 6	32	5.49868	4.30171	5.49017	5.44038	4.51624	5.78289	5.83945	4.37493	5.2261	5.9026	4.62619	6.57892	6.61104	5.30366	7.76186	5.90955	4.80322	6.0324	4232.58	3311.22	4226.03	4187.7	3476.35	4451.35	4494.88	3367.58	4022.76	4543.49	3560.99	5064.08	5088.81	4082.47	5974.65	4548.84	3697.25	4643.41
O70318	Epb41l2	Band 4.1-like protein 2	32	7.96013	5.44455	3.7235	7.15099	4.93614	3.84403	7.0641	5.20007	3.00134	8.17147	5.00133	3.94195	8.27385	5.28098	4.37681	7.73121	4.83134	4.06619	3449.49	2359.37	1613.56	3098.85	2139.06	1665.79	3061.2	2253.43	1300.62	3541.07	2167.31	1708.23	3585.44	2288.49	1896.67	3350.29	2093.64	1762.07
Q04750	Top1	DNA topoisomerase 1	32	4.6557	4.82657	7.48804	4.62889	4.95745	7.84906	5.00701	4.91202	8.03803	4.94022	4.83284	6.53934	5.06101	4.56889	5.74855	4.78543	4.56725	6.5937	4580.62	4748.74	7367.28	4554.24	4877.51	7722.48	4926.26	4832.81	7908.4	4860.55	4754.91	6433.88	4979.4	4495.22	5655.84	4708.26	4493.6	6487.37
Q9EQ20	Aldh6a1	Methylmalonate-semialdehyde dehydrogenase [acylating], mitochondrial	32	4.71441	12.3245	2.9234	4.36773	11.434	2.82034	4.53517	10.434	3.02573	3.63249	10.2275	2.76161	2.9878	5.78867	2.78182	3.81437	8.75321	2.67322	3952.34	10332.3	2450.84	3661.7	9585.71	2364.44	3802.07	8747.36	2536.63	3045.31	8574.27	2315.21	2504.83	4852.95	2332.15	3197.79	7338.28	2241.1
Q6PFD9	Nup98	Nuclear pore complex protein Nup98-Nup96	32	5.53701	5.02295	5.91256	6.24339	5.51329	6.44556	7.36041	6.71432	7.66322	4.94018	4.98907	4.73522	5.22595	4.62798	4.4617	4.96371	5.02783	4.61566	1932.84	1753.39	2063.93	2179.41	1924.56	2249.99	2569.34	2343.8	2675.04	1724.5	1741.56	1652.95	1824.25	1615.51	1557.47	1732.71	1755.09	1611.21
Q7TT37	Elp1	Elongator complex protein 1	32	4.82276	5.23066	6.81441	5.04135	5.3611	6.60923	4.84482	5.11332	6.32533	4.80703	5.33194	6.53425	5.04826	4.87892	6.36006	4.93558	5.44169	6.49929	3676.12	3987.04	5194.24	3842.74	4086.47	5037.85	3692.93	3897.59	4821.44	3664.13	4064.24	4980.69	3848.01	3718.92	4847.92	3762.11	4147.89	4954.04
Q11011	Npepps	Puromycin-sensitive aminopeptidase	32	5.19207	4.69327	6.69359	5.28082	4.40147	6.82622	4.96248	4.16685	6.12852	5.36182	4.42654	6.79401	5.67664	5.04598	6.83351	5.86941	4.56102	7.08579	2977.17	2691.16	3838.15	3028.06	2523.83	3914.21	2845.52	2389.3	3514.14	3074.51	2538.21	3895.73	3255.03	2893.4	3918.39	3365.56	2615.32	4063.05
Q6A0A9	FAM120A	Constitutive coactivator of PPAR-gamma-like protein 1	32	6.72609	5.73673	4.59973	6.39094	5.75887	4.42347	6.27129	5.48555	3.78603	6.66238	5.47968	4.64507	6.90422	5.95655	4.72177	6.6906	5.32551	4.4355	3432.12	2927.29	2347.11	3261.11	2938.58	2257.17	3200.06	2799.11	1931.9	3399.62	2796.12	2370.24	3523.02	3039.45	2409.38	3414.02	2717.45	2263.31
Q61210	Arhgef1	Rho guanine nucleotide exchange factor 1	32	7.63685	5.50541	4.06694	7.51695	5.73146	4.0553	8.02019	5.7926	3.54501	6.84011	5.53912	3.77061	6.79703	5.32531	3.87296	6.89408	5.3081	3.78198	3338.74	2406.9	1778.02	3286.32	2505.73	1772.93	3506.33	2532.46	1549.84	2990.42	2421.64	1648.47	2971.58	2328.16	1693.21	3014.01	2320.64	1653.44
E9Q512	Trip11	Thyroid hormone receptor interactor 11	32	6.57214	5.41697	5.00515	7.01519	5.35221	4.78868	6.57976	5.46314	4.67828	6.75933	5.1843	4.84847	6.4712	4.81939	4.96297	6.4332	5.1518	4.49782	4511.55	3718.57	3435.87	4815.69	3674.11	3287.27	4516.78	3750.26	3211.48	4640.05	3558.85	3328.31	4442.26	3308.35	3406.92	4416.18	3536.54	3087.6
Q91YH5	Atl3	Atlastin-3	32	6.62099	7.081	3.8798	6.88175	6.77211	3.83389	7.89322	7.17903	4.30833	5.93343	6.19594	3.21339	5.99255	5.20812	3.58416	6.1118	5.89934	3.41115	4821.7	5156.69	2825.44	5011.6	4931.75	2792.01	5748.19	5228.08	3137.52	4320.99	4512.16	2340.14	4364.04	3792.78	2610.15	4450.88	4296.16	2484.15
Q08093	Cnn2	Calponin-2	32	6.76557	5.06545	4.5737	6.6471	5.34466	4.04841	7.33269	5.99236	4.45364	6.44312	5.1796	4.76115	6.29976	5.78735	5.60795	6.22383	5.28591	4.18774	4592.31	3438.31	3104.52	4511.89	3627.83	2747.97	4977.26	4067.48	3023.03	4373.44	3515.79	3231.75	4276.13	3928.32	3806.54	4224.59	3587.95	2842.54
Q9ET54	Palld	Palladin	32	4.97101	4.18122	6.40685	4.58318	3.92053	5.84659	4.6601	4.37801	5.20099	6.55979	5.02353	7.25936	6.78529	6.2935	7.18223	5.54855	4.99766	6.2016	3026.06	2545.29	3900.13	2789.98	2386.6	3559.07	2836.8	2665.08	3166.07	3993.22	3058.04	4419.08	4130.49	3831.12	4372.13	3377.64	3042.29	3775.18
P11881	Itpr1	Inositol 1,4,5-trisphosphate receptor type 1	32	6.62348	7.72175	4.1721	6.56477	7.86037	4.27134	6.31778	8.25698	3.85591	5.41838	6.63905	3.43529	4.41096	5.99245	2.68641	5.36882	6.60865	3.79549	4407.38	5138.19	2776.19	4368.31	5230.43	2842.23	4203.96	5494.34	2565.79	3605.49	4417.74	2285.9	2935.13	3987.48	1787.58	3572.51	4397.51	2525.59
A0A0R4J1E2	Eef1d	Isoform of P57776, Elongation factor 1-delta	32	5.5468	4.91951	5.15856	5.76878	5.39316	5.94237	6.44633	5.8059	6.23182	5.70089	5.28903	5.39642	5.88863	5.37545	5.32841	5.65328	5.0403	5.11434	3808.69	3377.96	3542.11	3961.11	3703.19	4080.3	4426.34	3986.6	4279.05	3914.5	3631.69	3705.43	4043.4	3691.03	3658.73	3881.8	3460.9	3511.74
O70475	Ugdh	UDP-glucose 6-dehydrogenase	32	7.66807	4.73216	4.20613	7.32005	4.68997	4.09543	7.3133	5.43554	4.30972	7.6021	4.66451	5.08495	6.8056	4.47154	5.84889	7.05983	4.50155	4.19068	7568.26	4670.56	4151.38	7224.77	4628.93	4042.12	7218.1	5364.79	4253.63	7503.15	4603.79	5018.76	6717.01	4413.33	5772.76	6967.94	4442.96	4136.13
Q91VR5	Ddx1	ATP-dependent RNA helicase DDX1	32	5.33682	5.38834	5.84164	5.41857	5.88609	6.02621	6.16483	6.44436	6.5582	4.99552	5.3322	5.26336	5.16639	5.32434	5.39896	4.95439	5.2566	5.24317	3874.16	3911.56	4240.62	3933.51	4272.89	4374.6	4475.24	4678.16	4760.79	3626.4	3870.81	3820.83	3750.44	3865.1	3919.27	3596.54	3815.93	3806.17
Q9DBJ1	Pgam1	Phosphoglycerate mutase 1	32	6.73149	4.41047	5.44168	6.47296	4.18028	5.19398	6.31416	3.75824	4.98375	7.21794	4.12253	5.76027	7.3833	4.14163	6.42639	7.35924	4.1286	5.97308	4048.55	2652.61	3272.81	3893.06	2514.16	3123.84	3797.55	2260.34	2997.39	4341.11	2479.43	3464.42	4440.56	2490.92	3865.05	4426.1	2483.08	3592.42
P80318	Cct3	T-complex protein 1 subunit gamma	32	4.77442	4.9078	5.64557	4.73003	5.24703	7.02522	5.94238	6.11424	6.61806	5.06656	5.19459	6.06939	5.32968	5.45211	5.87318	5.21409	4.94905	5.84659	3113.22	3200.2	3681.28	3084.28	3421.4	4580.89	3874.81	3986.87	4315.4	3303.72	3387.21	3957.63	3475.29	3555.13	3829.69	3399.92	3227.1	3812.35
P50544	Acadvl	Very long-chain specific acyl-CoA dehydrogenase, mitochondrial	32	5.12249	6.77589	5.55961	5.18142	6.37946	5.65453	5.20143	6.11669	5.31092	4.82602	5.98027	5.90053	4.99977	5.09522	5.6545	4.97504	5.68744	5.57878	3136.8	4149.27	3404.47	3172.89	3906.51	3462.6	3185.14	3745.61	3252.19	2955.26	3662.07	3613.24	3061.65	3120.1	3462.58	3046.51	3482.76	3416.22
Q8VEK3	Hnrnpu	Heterogeneous nuclear ribonucleoprotein U	32	5.84374	6.11922	4.89653	6.08399	6.36065	5.6725	6.51856	6.82192	5.12224	5.59645	5.69084	4.08469	5.90149	5.7103	3.87188	5.7708	5.62682	4.30739	5148.41	5391.11	4313.9	5360.08	5603.81	4997.55	5742.94	6010.2	4512.76	4930.55	5013.7	3598.67	5199.29	5030.85	3411.18	5084.15	4957.31	3794.87
Q8R1B4	Eif3c	Eukaryotic translation initiation factor 3 subunit C	32	5.61545	5.24759	5.24616	5.52235	5.23239	5.54173	5.94528	5.94857	5.61235	5.64204	5.3441	5.32086	6.0253	5.7641	5.48252	5.60732	5.36508	5.53681	4690.37	4383.11	4381.92	4612.6	4370.42	4628.79	4965.86	4968.61	4687.78	4712.58	4463.72	4444.31	5032.7	4814.53	4579.33	4683.58	4481.25	4624.69
Q99LB4	Capg	Isoform of P24452, Macrophage-capping protein	32	8.21169	3.99158	2.47074	9.09305	4.73353	3.78251	14.9959	7.48527	4.46351	7.2977	3.83271	2.2092	6.89344	4.05573	2.35097	7.78065	3.90056	2.45126	4159.38	2021.81	1251.48	4605.81	2397.62	1915.92	7595.71	3791.44	2260.86	3696.43	1941.34	1119	3491.66	2054.31	1190.81	3941.05	1975.71	1241.61
Q9Z1T1	Ap3b1	AP-3 complex subunit beta-1	32	6.44877	6.09504	4.79489	6.38104	5.68064	4.22555	5.76043	5.92898	4.29794	6.18093	5.72104	4.48775	6.28402	5.98431	5.08301	6.12995	5.70307	4.81262	4027.25	3806.35	2994.4	3984.95	3547.55	2638.85	3597.38	3702.64	2684.06	3859.98	3572.78	2802.6	3924.37	3737.19	3174.34	3828.15	3561.56	3005.48
Q76MZ3	Ppp2r1a	Serine/threonine-protein phosphatase 2A 65 kDa regulatory subunit A alpha isoform	32	5.52986	5.14127	5.53237	5.64489	5.52825	5.6571	6.56888	6.04464	6.64785	5.4412	5.10912	5.21107	5.48772	5.43021	5.12709	5.59264	5.10857	5.19728	2905.8	2701.61	2907.12	2966.24	2904.95	2972.66	3451.78	3176.3	3493.28	2859.21	2684.71	2738.28	2883.65	2853.44	2694.15	2938.79	2684.42	2731.04
Q9WTX6	Cul1	Cullin-1	32	6.04181	5.33506	4.21772	5.18228	5.19221	5.59319	5.59076	5.35498	4.69372	6.15679	6.02579	5.1578	6.5887	6.75044	5.02567	6.56768	5.23431	5.29107	3528.28	3115.55	2463.06	3026.33	3032.13	3266.3	3264.88	3127.19	2741.02	3595.43	3518.92	3012.04	3847.65	3942.1	2934.88	3835.38	3056.72	3089.87
Q8BMJ2	Lars1	Leucine--tRNA ligase, cytoplasmic	32	4.98695	4.75825	6.28848	5.04096	4.71748	6.2828	4.80616	4.56333	6.09967	5.49741	5.32705	6.63488	5.8723	5.44473	6.70215	5.32382	5.46648	6.18711	2575.04	2456.95	3247.09	2602.92	2435.89	3244.16	2481.68	2356.3	3149.6	2838.62	2750.65	3425.95	3032.19	2811.41	3460.69	2748.98	2822.64	3194.75
Q08091	Cnn1	Calponin-1	32	5.28023	7.76987	2.5111	5.33941	7.99573	1.99213	5.50162	8.95815	2.20802	4.62982	8.0059	3.45905	5.34795	10.5088	4.85154	4.78915	8.14621	2.70528	2957.78	4352.38	1406.62	2990.93	4478.9	1115.91	3081.8	5018.01	1236.84	2593.45	4484.59	1937.63	2995.71	5886.63	2717.65	2682.7	4563.19	1515.39
O35379	Abcc1	Multidrug resistance-associated protein 1	32	3.414	2.54251	10.6985	3.40863	2.09031	9.90636	3.01272	1.98931	8.19815	3.90803	2.70013	11.6524	4.04732	2.94838	11.277	3.90279	2.77443	11.5291	2658.32	1979.73	8330.39	2654.14	1627.63	7713.62	2345.86	1548.98	6383.51	3043	2102.47	9073.17	3151.46	2295.77	8780.86	3038.92	2160.32	8977.15
Q9D0R2	Tars1	Threonine--tRNA ligase 1, cytoplasmic	31	4.9433	4.60693	6.68513	4.71053	4.57505	7.02649	4.9273	4.70642	6.4314	5.35723	4.85187	6.7063	5.80893	5.19472	6.78325	5.27783	4.76171	6.6456	3012.14	2807.18	4073.51	2870.31	2787.76	4281.52	3002.4	2867.8	3918.91	3264.37	2956.43	4086.41	3539.61	3165.35	4133.3	3215.99	2901.5	4049.43
Q6IRU2	Tpm4	Tropomyosin alpha-4 chain	31	6.21067	4.48159	6.95672	8.02756	4.97842	5.05131	5.13929	5.03908	8.43421	4.86591	3.59115	5.28598	6.28834	4.9182	5.59228	5.84256	3.70534	5.59138	4578.69	3303.96	5128.69	5918.15	3670.23	3723.97	3788.83	3714.96	6217.94	3587.29	2647.5	3896.98	4635.95	3625.84	4122.79	4307.3	2731.69	4122.13
P68254	Ywhaq	14-3-3 protein theta	31	5.58658	6.05535	4.53342	5.86299	6.67326	5.62461	7.7694	8.52871	6.53549	5.18701	5.17201	3.91455	5.03966	4.92701	4.10837	5.51968	4.99512	3.96678	1823.65	1976.67	1479.86	1913.88	2178.38	1836.07	2536.2	2784.06	2133.41	1693.22	1688.32	1277.84	1645.12	1608.34	1341.11	1801.81	1630.58	1294.89
E9PVC5	Eif4g1	Isoform of Q6NZJ6, Eukaryotic translation initiation factor 4 gamma 1	31	5.8744	5.24627	5.7284	6.18702	5.36837	4.88427	5.79828	5.24092	5.26883	5.83782	5.38973	5.59084	6.17145	5.34878	5.73043	5.7015	5.25194	5.38076	2817.86	2516.55	2747.82	2967.81	2575.12	2342.9	2781.34	2513.98	2527.37	2800.31	2585.37	2681.84	2960.34	2565.72	2748.8	2734.92	2519.27	2581.07
Q6ZQK5	Acap2	Arf-GAP with coiled-coil, ANK repeat and PH domain-containing protein 2	31	6.14794	6.00539	4.15029	5.82522	6.08055	4.81432	6.35498	6.75084	4.20447	6.04696	6.00888	4.57318	5.77692	6.61868	4.72059	5.89841	5.6602	4.36216	2999.81	2930.25	2025.08	2842.34	2966.93	2349.09	3100.83	3293.99	2051.52	2950.54	2931.96	2231.42	2818.78	3229.5	2303.35	2878.05	2761.82	2128.46
A0A1D5RLL4	Trrap	Isoform of Q80YV3, Transformation/transcription domain-associated protein	31	6.06999	5.88123	5.36576	6.40636	6.42623	5.01264	6.03046	6.03957	4.56759	5.68498	6.08668	4.43978	5.84175	5.5743	4.1493	5.83993	6.17587	4.4076	2543.66	2464.56	2248.54	2684.61	2692.94	2100.57	2527.09	2530.91	1914.07	2382.32	2550.65	1860.51	2448.01	2335.93	1738.78	2447.25	2588.03	1847.03
P31001	Des	Desmin	31	1.27275	1.83963	1.8427	2.32647	3.18052	3.30065	1.57599	2.23675	2.5534	6.69479	11.2959	10.8616	5.46479	12.747	6.74155	6.20324	11.2089	8.65342	555.333	802.681	804.021	1015.1	1387.75	1440.16	687.645	975.954	1114.12	2921.12	4928.72	4739.2	2384.44	5561.87	2941.52	2706.64	4890.73	3775.72
P45376	Akr1b1	Aldo-keto reductase family 1 member B1	31	3.68694	3.34964	9.13401	3.787	3.77133	8.48155	4.6019	3.96131	10.3187	3.75626	3.57272	8.78733	3.82368	3.60084	9.00093	3.92155	3.66572	8.77855	3089.26	2806.64	7653.3	3173.09	3159.96	7106.61	3855.89	3319.14	8645.96	3147.34	2993.55	7362.82	3203.83	3017.11	7541.79	3285.83	3071.47	7355.46
Q62465	Vat1	Synaptic vesicle membrane protein VAT-1 homolog	31	6.4777	6.01843	4.27966	5.94203	5.96422	4.6282	6.3625	6.81907	4.64342	6.43196	5.72743	4.41966	5.81401	5.77501	4.89101	6.30317	5.09439	4.40812	2587.46	2404.01	1709.47	2373.49	2382.35	1848.69	2541.44	2723.82	1854.77	2569.19	2287.77	1765.39	2322.35	2306.77	1953.67	2517.74	2034.91	1760.78
Q9D154	Serpinb1a	Leukocyte elastase inhibitor A	31	3.71487	5.78949	2.88675	3.99823	7.40262	3.63735	3.11359	5.15463	2.62767	5.1746	10.5896	5.2639	4.6092	10.7177	3.7148	5.26822	11.2365	5.10032	2007.74	3128.99	1560.17	2160.89	4000.82	1965.84	1682.77	2785.87	1420.15	2796.67	5723.26	2844.93	2491.09	5792.49	2007.71	2847.27	6072.89	2756.53
Q8K009	Aldh1l2	Mitochondrial 10-formyltetrahydrofolate dehydrogenase	31	3.71861	4.98656	6.45442	3.70288	4.76147	7.11622	3.7588	4.60334	6.70398	4.90373	5.09888	8.00019	5.99782	4.14928	8.24206	4.62164	5.52242	7.65768	2350.26	3151.64	4079.37	2340.32	3009.37	4497.64	2375.66	2909.44	4237.1	3099.29	3222.63	5056.34	3790.79	2622.46	5209.21	2921	3490.32	4839.86
Q60710	Samhd1	Deoxynucleoside triphosphate triphosphohydrolase SAMHD1	31	7.41635	6.46524	3.2495	6.9733	6.10841	3.60684	6.73152	5.66977	2.68428	7.34218	6.24885	3.22499	6.98021	6.58563	3.32529	7.64209	6.13105	3.61449	5479.36	4776.66	2400.8	5152.03	4513.03	2664.81	4973.39	4188.95	1983.21	5424.56	4616.78	2382.69	5157.13	4865.61	2456.8	5646.14	4529.75	2670.46
Q62318	Trim28	Transcription intermediary factor 1-beta	31	5.85728	5.54828	6.45558	5.79472	5.40484	6.3992	5.26938	4.94036	5.75161	5.54648	5.00188	5.64879	5.55106	5.47756	5.01822	5.5341	4.94423	5.85641	3377.78	3199.59	3722.81	3341.71	3116.87	3690.3	3038.75	2849.01	3316.84	3198.55	2884.49	3257.55	3201.19	3158.8	2893.91	3191.41	2851.24	3377.28
A0A0R4J140	Cluh	Isoform of Q5SW19, Clustered mitochondria protein homolog	31	2.65331	12.6629	2.84	2.21459	11.3736	2.92873	2.34319	9.00672	2.62257	2.94268	12.5708	4.17101	3.11653	7.7978	3.86059	3.05334	9.96333	3.8784	1794.58	8564.6	1920.85	1497.85	7692.59	1980.86	1584.83	6091.75	1773.79	1990.3	8502.31	2821.09	2107.88	5274.09	2611.13	2065.15	6738.76	2623.18
Q69ZW3	Ehbp1	EH domain-binding protein 1	31	7.35977	9.84556	1.34729	6.54054	9.96876	1.32073	6.30741	9.7886	1.01488	5.84759	8.18616	1.30688	5.25958	8.78751	1.63271	5.98421	7.97293	1.5289	4053.71	5422.86	742.08	3602.48	5490.72	727.446	3474.07	5391.49	558.987	3220.81	4508.87	719.819	2896.94	4840.1	899.287	3296.06	4391.43	842.105
P42567	Eps15	Epidermal growth factor receptor substrate 15	31	5.65998	5.74777	7.49999	5.62449	5.72462	6.23204	5.52366	5.67397	6.89967	5.28953	5.14324	5.37878	5.0266	4.44872	4.56837	5.13375	4.81674	5.60808	2975.07	3021.22	3942.24	2956.42	3009.05	3275.77	2903.42	2982.42	3626.69	2780.35	2703.45	2827.26	2642.15	2338.39	2401.28	2698.47	2531.84	2947.79
Q9R0E1	Plod3	Multifunctional procollagen lysine hydroxylase and glycosyltransferase LH3	31	5.42744	5.21881	5.6923	5.2833	5.45648	5.60914	5.20306	4.70244	5.50049	5.15506	5.58086	6.30068	6.18726	4.96209	7.2145	5.43103	5.18388	5.89118	2150.17	2067.52	2255.1	2093.07	2161.67	2222.15	2061.28	1862.95	2179.11	2042.26	2210.95	2496.12	2451.18	1965.82	2858.14	2151.59	2053.68	2333.89
Q91WQ3	Yars1	Tyrosine--tRNA ligase, cytoplasmic	31	5.21715	4.84051	6.08578	4.97757	4.67122	6.27898	4.95831	4.55791	5.97956	5.84461	5.00418	6.57178	6.13057	5.41113	6.67268	5.50732	4.874	6.41674	3499.14	3246.52	4081.72	3338.45	3132.98	4211.3	3325.53	3056.98	4010.48	3919.97	3356.3	4407.68	4111.76	3629.23	4475.36	3693.75	3268.98	4303.69
P14869	Rplp0	60S acidic ribosomal protein P0	31	5.77704	5.54349	4.97477	5.70565	5.76022	5.14268	5.92834	6.08498	4.79039	5.81409	5.81159	5.03179	6.1672	5.91344	5.16218	5.92654	5.67476	4.79085	3935.8	3776.69	3389.23	3887.16	3924.34	3503.63	4038.88	4145.59	3263.61	3961.04	3959.34	3428.07	4201.61	4028.73	3516.91	4037.66	3866.12	3263.93
P46061	Rangap1	Ran GTPase-activating protein 1	31	5.2531	5.01001	6.24673	5.9271	5.4533	5.86431	6.08059	5.76867	7.16114	5.2594	4.88762	5.47784	5.45165	4.95156	5.45064	5.26364	5.01699	5.4757	3847.8	3669.74	4575.61	4341.49	3994.44	4295.5	4453.92	4225.44	5245.4	3852.41	3580.09	4012.42	3993.23	3626.92	3992.49	3855.52	3674.85	4010.85
Q61166	Mapre1	Microtubule-associated protein RP/EB family member 1	31	5.9094	4.68238	6.18474	6.21734	4.91382	5.97644	6.21522	4.78634	7.62209	5.10363	4.22893	5.46332	6.04412	5.04184	5.4376	5.66387	4.34216	6.16678	4403.76	3489.38	4608.95	4633.25	3661.84	4453.72	4631.67	3566.85	5680.08	3803.29	3151.45	4071.34	4504.16	3757.25	4052.17	4220.79	3235.84	4595.56
Q9Z0X1	Aifm1	Apoptosis-inducing factor 1, mitochondrial	31	3.66597	5.11106	9.65204	3.50748	4.74258	9.26725	3.5329	4.25915	8.86781	3.29499	4.63677	8.58333	3.27374	3.90544	7.58655	3.43234	4.3134	8.36721	3161.24	4407.36	8323.14	3024.56	4089.61	7991.32	3046.49	3672.75	7646.88	2841.33	3998.37	7401.57	2823	3367.74	6542.02	2959.77	3719.53	7215.2
P06801	Me1	NADP-dependent malic enzyme	31	3.01847	5.49042	8.27681	2.71054	5.10585	10.2719	3.24755	4.56345	9.61413	3.07567	5.24198	8.0065	3.17479	3.34519	7.85737	3.29698	4.41829	9.28411	1739.46	3163.97	4769.69	1562.01	2942.36	5919.4	1871.47	2629.79	5540.36	1772.43	3020.81	4613.92	1829.54	1927.74	4527.98	1899.96	2546.14	5350.17
P14873	Map1b	Microtubule-associated protein 1B	31	3.77311	4.64382	7.79121	3.11686	3.89023	6.94603	2.66006	3.17417	5.91898	5.38048	6.21554	8.49277	5.39829	7.26837	6.78773	4.67342	5.81837	8.05056	2244.66	2762.66	4635.07	1854.25	2314.34	4132.27	1582.5	1888.35	3521.26	3200.9	3697.69	5052.44	3211.5	4324.03	4038.09	2780.26	3461.41	4789.36
Q8BKC5	Ipo5	Importin-5	31	3.79253	3.84448	7.9229	4.013	4.09687	8.14498	4.48259	4.54118	9.01984	4.47107	4.22154	7.89416	4.78639	4.69668	8.35935	4.08362	4.27869	7.35012	1459.42	1479.41	3048.85	1544.26	1576.54	3134.3	1724.96	1747.51	3470.96	1720.53	1624.51	3037.79	1841.87	1807.35	3216.79	1571.43	1646.5	2828.43
Q64521	Gpd2	Glycerol-3-phosphate dehydrogenase, mitochondrial	31	5.94439	4.73814	6.37404	5.61123	4.60924	6.79167	5.7749	5.05781	6.47887	4.8307	4.22773	6.74991	4.45212	4.24102	7.31769	5.34097	4.49808	6.96149	3976.95	3169.93	4264.4	3754.05	3083.7	4543.8	3863.56	3383.8	4334.53	3231.86	2828.46	4515.86	2978.58	2837.35	4895.72	3573.25	3009.33	4657.41
Q9JLN9	Mtor	Serine/threonine-protein kinase mTOR	31	5.68709	5.65905	6.05156	5.46081	5.37437	5.8152	5.19129	5.24786	5.4888	5.32963	5.51321	5.85955	5.38494	5.36455	5.68257	5.38656	5.55701	5.94594	2611.99	2599.11	2779.39	2508.07	2468.36	2670.83	2384.28	2410.26	2520.92	2447.82	2532.13	2691.2	2473.22	2463.86	2609.92	2473.97	2552.25	2730.88
Q3UW53	Niban1	Protein Niban 1	31	3.93029	5.92324	6.63601	3.57395	5.87109	6.34894	3.47053	5.82117	6.28901	5.82461	6.03336	6.21979	6.17429	5.99525	5.78093	4.93339	5.09376	6.08039	2336.96	3521.97	3945.79	2125.08	3490.96	3775.09	2063.58	3461.28	3739.46	3463.33	3587.45	3698.3	3671.25	3564.79	3437.35	2933.4	3028.76	3615.41
Q91VI7	Rnh1	Ribonuclease inhibitor	31	5.82214	4.2539	4.58577	5.94476	4.79341	6.09562	8.62323	6.13038	6.46447	6.35287	4.55785	4.69933	6.18451	4.95997	5.09064	6.20953	4.71598	4.51562	3314.77	2421.91	2610.86	3384.58	2729.07	3470.48	4909.54	3490.26	3680.48	3616.94	2594.96	2675.51	3521.08	2823.91	2898.3	3535.33	2684.99	2570.92
P13707	Gpd1	Glycerol-3-phosphate dehydrogenase [NAD(+)], cytoplasmic	31	0.57341	21.1832	0.65159	0.0404296	20.4006	0.422545	0.233538	19.5128	0.859596	0.146456	15.5919	0.495084	0.247902	5.68376	0.483351	0.306383	12.7221	0.445311	368.634	13618.3	418.894	25.9914	13115.2	271.646	150.137	12544.4	552.617	94.1538	10023.8	318.28	159.371	3653.98	310.737	196.967	8178.77	286.281
Q9Z2I9	Sucla2	Succinate--CoA ligase [ADP-forming] subunit beta, mitochondrial	31	4.51815	5.92294	6.13449	4.54297	6.23715	5.89227	4.54832	5.6135	5.93871	4.36534	6.03241	7.00007	4.13153	5.33029	6.50674	4.54368	6.04297	6.69847	3389.69	4443.62	4602.34	3408.31	4679.36	4420.62	3412.33	4211.47	4455.46	3275.05	4525.75	5251.73	3099.64	3999	4881.61	3408.85	4533.67	5025.46
P11087	Col1a1	Collagen alpha-1(I) chain	31	5.9528	9.43366	3.02886	5.51294	8.50666	2.03434	4.85521	7.51205	1.69613	4.76245	9.45012	2.40364	5.13224	12.9312	2.36488	3.38791	8.25318	2.7817	3904.28	6187.29	1986.55	3615.79	5579.29	1334.27	3184.4	4926.96	1112.45	3123.57	6198.08	1576.48	3366.1	8481.27	1551.06	2222.04	5413.04	1824.45
F8VPK0	Ttc37	Tetratricopeptide repeat domain 37	31	5.90892	4.54945	6.33382	5.89351	4.70596	6.22151	6.16267	4.70754	5.80564	5.74778	4.81857	6.13318	5.84935	4.33231	6.60292	5.63814	4.7412	5.84752	2390.94	1840.85	2562.87	2384.71	1904.19	2517.43	2493.62	1904.82	2349.15	2325.74	1949.75	2481.68	2366.84	1753	2671.76	2281.38	1918.44	2366.1
Q8BYA0	Tbcd	Tubulin-specific chaperone D	31	5.21353	5.0013	6.44874	5.2753	5.00548	6.62358	5.58336	5.06424	6.86103	5.10204	4.92048	6.29269	5.24448	4.87025	6.33907	5.11365	5.01996	6.02083	3124.03	2996.85	3864.18	3161.04	2999.36	3968.95	3345.64	3034.57	4111.23	3057.22	2948.43	3770.68	3142.57	2918.33	3798.47	3064.17	3008.03	3607.77
Q9CPY7	Lap3	Cytosol aminopeptidase	31	5.01702	6.53058	6.00089	4.57529	6.46668	5.51157	4.63135	6.27058	5.88576	4.34658	5.92723	6.34834	4.50282	5.44263	6.26315	4.59087	5.66678	6.02187	2626.61	3419.02	3141.71	2395.35	3385.57	2885.53	2424.7	3282.9	3081.43	2275.61	3103.14	3323.61	2357.41	2849.44	3279.01	2403.51	2966.79	3152.69
Q8CC88	Vwa8	von Willebrand factor A domain-containing protein 8	31	4.01902	6.39348	6.78211	4.15806	6.04073	6.86376	4.10613	5.80318	6.87122	3.76681	5.84339	6.99974	3.66062	5.18043	6.86937	3.89933	6.029	6.71364	1798.35	2860.82	3034.71	1860.56	2702.98	3071.25	1837.32	2596.68	3074.59	1685.49	2614.67	3132.09	1637.98	2318.03	3073.76	1744.79	2697.73	3004.08
P10630	Eif4a2	Eukaryotic initiation factor 4A-II	31	6.04177	5.4775	5.40699	6.1019	5.68719	5.13098	5.62908	5.47595	4.49888	5.54969	5.78465	5.39305	5.97891	5.27523	5.41054	6.00269	5.78283	5.37218	3161.89	2866.59	2829.69	3193.36	2976.33	2685.24	2945.91	2865.77	2354.44	2904.37	3027.33	2822.39	3129	2760.73	2831.54	3141.44	3026.38	2811.47
O88569	Hnrnpa2b1	Heterogeneous nuclear ribonucleoproteins A2/B1	31	6.65859	6.55237	4.55389	6.95636	6.41821	4.49652	6.58213	6.16135	4.34853	6.3305	5.61695	3.83437	6.49759	5.64443	3.38745	6.52556	5.30924	4.12597	4997.6	4917.87	3417.92	5221.09	4817.18	3374.86	4940.21	4624.4	3263.78	4751.35	4215.8	2877.88	4876.76	4236.42	2542.45	4897.76	3984.85	3096.75
Q61937	Npm1	Nucleophosmin	31	5.93281	5.46626	6.00445	5.71337	5.40992	5.6397	5.57468	5.24706	5.47729	5.68286	5.22146	5.20339	6.10267	5.63034	5.28293	5.78061	5.16039	5.46978	3678.98	3389.67	3723.41	3542.91	3354.73	3497.22	3456.91	3253.75	3396.51	3523.99	3237.87	3226.67	3784.32	3491.42	3275.99	3584.6	3200	3391.86
P24369	Ppib	Peptidyl-prolyl cis-trans isomerase B	31	6.2301	5.76152	5.59799	5.91501	6.05291	5.37679	5.75465	5.52495	5.62301	5.57754	5.26	4.93313	5.87968	5.42403	4.86634	5.86506	4.94864	5.40867	5330.24	4929.35	4789.43	5060.66	5178.65	4600.18	4923.46	4726.94	4810.84	4771.93	4500.26	4220.6	5030.44	4640.6	4163.46	5017.93	4233.88	4627.46
Q8BP47	NARS1	Asparagine--tRNA ligase, cytoplasmic	31	4.19932	3.90033	6.18429	4.2323	3.84154	6.87479	4.61258	3.94856	6.40671	5.33093	4.63027	8.36193	5.84136	4.83792	10.0752	5.02652	4.66154	7.03388	1970.79	1830.47	2902.36	1986.27	1802.88	3226.42	2164.74	1853.11	3006.75	2501.87	2173.04	3924.35	2741.42	2270.49	4728.42	2359.01	2187.71	3301.08
Q9DBP5	Cmpk1	UMP-CMP kinase	31	7.55939	5.49634	4.24593	8.21914	5.83873	4.30088	8.12432	6.30583	5.26881	5.78639	4.67971	4.27622	5.33702	4.30378	4.89871	6.46434	4.5759	4.31855	3357.31	2441.06	1885.72	3650.32	2593.12	1910.13	3608.21	2800.57	2340	2569.88	2078.37	1899.17	2370.3	1911.41	2175.64	2870.97	2032.27	1917.97
P21107	Tpm3	Tropomyosin alpha-3 chain	30	6.46087	5.0538	6.40664	6.40918	5.01112	4.84335	5.36137	4.86962	6.6934	5.55843	4.47809	5.81339	5.46321	5.44285	6.35181	5.64943	4.62438	5.50908	4944.75	3867.86	4903.24	4905.19	3835.2	3706.8	4103.26	3726.9	5122.72	4254.08	3427.26	4449.21	4181.2	4165.62	4861.28	4323.72	3539.21	4216.31
P63101	Ywhaz	14-3-3 protein zeta/delta	30	5.43925	4.12359	4.53176	5.50099	4.4098	7.73022	9.34515	6.95297	7.96788	5.80217	4.21328	4.26274	5.8085	4.79759	4.02167	6.20581	4.40917	4.47743	3477.1	2636.05	2896.98	3516.57	2819.01	4941.62	5973.98	4444.76	5093.55	3709.1	2693.38	2725	3713.14	3066.91	2570.9	3967.12	2818.61	2862.25
Q6ZWQ0	Syne2	Nesprin-2	30	6.65168	8.37821	3.4442	7.24305	7.67938	3.17869	6.4594	7.32648	2.65428	6.01111	7.12696	2.99054	5.55101	6.64934	2.72685	5.88178	6.80162	3.24541	2649.93	3337.75	1372.12	2885.52	3059.34	1266.34	2573.32	2918.76	1057.42	2394.73	2839.27	1191.38	2211.43	2648.99	1086.33	2343.21	2709.66	1292.92
Q99NB9	Sf3b1	Splicing factor 3B subunit 1	30	6.04039	5.8197	4.88356	6.01988	5.46197	4.97119	6.07681	5.4114	4.90105	6.4571	5.65424	4.82058	7.01291	5.73106	4.30277	6.52335	5.10869	4.80334	3486.08	3358.72	2818.45	3474.25	3152.26	2869.02	3507.1	3123.08	2828.54	3726.58	3263.22	2782.1	4047.36	3307.56	2483.26	3764.81	2948.37	2772.15
Q7TMY8	Huwe1	E3 ubiquitin-protein ligase HUWE1	30	5.46629	5.90518	5.25679	5.68895	5.73431	5.46071	5.75377	5.6893	5.00443	5.45813	5.95816	5.17045	5.45513	6.25363	4.86459	5.48617	6.09906	5.29494	2634.71	2846.25	2533.73	2742.03	2763.9	2632.02	2773.27	2742.2	2412.1	2630.78	2871.79	2492.12	2629.33	3014.2	2344.7	2644.29	2939.7	2552.12
A6ZI44	Aldoa	Isoform of P05064, Fructose-bisphosphate aldolase	30	6.79605	4.2374	4.29914	6.89817	4.271	4.65305	7.26494	4.12051	4.37916	7.20186	4.70424	5.6785	7.38364	4.98913	5.80698	7.37909	4.645	5.29216	3347.27	2087.06	2117.46	3397.57	2103.61	2291.78	3578.22	2029.48	2156.88	3547.15	2316.99	2796.85	3636.68	2457.31	2860.12	3634.44	2287.82	2606.56
Q93092	Taldo1	Transaldolase	30	3.74494	6.87006	7.7195	3.413	6.58405	6.87691	3.65989	5.83461	7.47705	3.23108	5.81576	7.29895	3.21559	4.49361	8.13684	3.29313	5.24663	7.0884	3462.84	6352.55	7138	3155.91	6088.08	6358.88	3384.2	5395.09	6913.81	2987.69	5377.67	6749.13	2973.36	4155.12	7523.91	3045.07	4851.41	6554.44
A0A0R4IZY0	Thop1	Isoform of Q8C1A5, Thimet oligopeptidase	30	4.27394	4.67701	5.63222	4.33278	5.03758	6.49	4.65028	5.03776	6.76717	4.61829	5.62	7.7831	4.42809	6.32121	6.36335	4.78231	5.5931	7.5918	2161.97	2365.86	2849.05	2191.73	2548.26	3282.96	2352.34	2548.35	3423.17	2336.16	2842.87	3937.08	2239.95	3197.58	3218.9	2419.13	2829.27	3840.3
P62192	Psmc1	26S proteasome regulatory subunit 4	30	5.43767	5.72139	5.60424	5.52671	5.48509	5.84292	5.14978	5.1785	5.21626	5.71682	5.61316	5.7857	5.56929	5.70097	5.64309	5.61093	5.58374	5.61375	2965.45	3120.18	3056.29	3014.01	2991.31	3186.46	2808.45	2824.11	2844.7	3117.69	3061.15	3155.25	3037.23	3109.04	3077.48	3059.94	3045.11	3061.48
Q80UG5	Septin9	Septin-9	30	6.04324	5.66134	5.74656	5.75636	5.53163	5.33057	5.31312	5.24522	4.78966	5.69902	5.38481	5.6264	6.10329	5.92964	5.46008	5.71649	5.17731	5.48527	3383.52	3169.7	3217.41	3222.9	3097.08	2984.51	2974.74	2936.72	2681.66	3190.8	3014.88	3150.14	3417.14	3319.92	3057.02	3200.58	2898.7	3071.12
P35700	Prdx1	Peroxiredoxin-1	30	6.46875	5.15012	5.8833	6.44912	5.42763	5.24694	6.40804	5.48275	5.60119	5.83478	4.91914	5.13356	5.94745	4.47493	5.45042	6.18208	4.69397	5.24582	4723.13	3760.34	4295.66	4708.8	3962.96	3831.03	4678.8	4003.2	4089.68	4260.24	3591.68	3748.24	4342.5	3267.35	3979.6	4513.82	3427.28	3830.21
Q7TQ48-1	Srl	Isoform of Q7TQ48, Isoform 2 of Sarcalumenin	30	0.944111	1.69189	1.64869	2.41036	3.7745	3.15831	1.43137	2.54013	2.18534	6.77517	12.6701	8.7311	5.2341	13.3519	5.65225	6.56692	13.4335	7.80026	403.118	722.404	703.96	1029.18	1611.64	1348.54	611.169	1084.59	933.1	2892.87	5409.91	3728.02	2234.86	5701	2413.4	2803.95	5735.84	3330.56
Q9Z1F9	Uba2	SUMO-activating enzyme subunit 2	30	6.12651	5.59329	5.82082	5.99139	5.3853	5.80162	6.0706	5.25888	5.41601	5.91408	5.28645	4.91474	6.06285	5.48512	4.47894	5.92848	5.29757	5.16736	4068.76	3714.63	3865.74	3979.02	3576.5	3852.99	4031.63	3492.54	3596.9	3927.68	3510.85	3263.99	4026.48	3642.79	2974.56	3937.24	3518.24	3431.76
Q8BH64	Ehd2	EH domain-containing protein 2	30	5.46938	10.0734	1.75877	4.57597	9.1416	1.70864	4.68556	7.71227	1.48104	6.01925	10.4402	2.09049	6.09042	9.24649	2.22538	6.01831	9.19591	2.06689	2846.87	5243.31	915.459	2381.84	4758.29	889.362	2438.88	4014.31	770.894	3133.08	5434.24	1088.12	3170.12	4812.89	1158.33	3132.59	4786.56	1075.84
Q9EQP2	Ehd4	EH domain-containing protein 4	30	4.14736	3.43015	3.9017	4.41202	3.58148	4.92631	4.33755	3.88117	4.08491	5.30593	6.80143	9.19947	4.58583	8.49658	8.4779	5.31791	7.30319	7.80911	1753.53	1450.29	1649.66	1865.43	1514.27	2082.87	1833.94	1640.98	1727.12	2243.38	2875.68	3889.59	1938.92	3592.41	3584.51	2248.45	3087.83	3301.74
G5E829	Atp2b1	Plasma membrane calcium-transporting ATPase 1	30	4.69891	4.88656	6.77433	5.2253	5.00998	7.9383	5.3672	5.48037	7.48535	4.7161	4.63131	6.17359	4.49669	4.82451	5.71791	5.08757	4.84801	6.63801	2791.72	2903.21	4024.77	3104.46	2976.54	4716.31	3188.76	3256	4447.2	2801.94	2751.56	3667.86	2671.58	2866.35	3397.13	3022.63	2880.3	3943.78
P50516	Atp6v1a	V-type proton ATPase catalytic subunit A	30	4.37476	3.56886	8.78766	4.26356	3.50063	8.81134	4.25319	3.41526	8.6482	4.35788	3.64588	8.50451	4.57874	3.70161	9.2002	4.62445	3.64406	8.11919	1615.58	1317.97	3245.25	1574.52	1292.77	3254	1570.69	1261.24	3193.75	1609.35	1346.41	3140.68	1690.91	1366.99	3397.6	1707.79	1345.74	2998.39
B2RXS4	Plxnb2	Plexin-B2	30	5.59232	3.8082	6.78599	5.21866	3.60434	7.31567	5.36387	3.52795	6.54497	6.27984	4.14123	6.7502	6.40131	5.27679	6.73348	5.91679	4.18996	6.54843	3825.14	2604.8	4641.61	3569.55	2465.36	5003.91	3668.88	2413.12	4476.75	4295.4	2832.59	4617.12	4378.48	3609.32	4605.69	4047.08	2865.93	4479.11
Q9CWJ9	Atic	Bifunctional purine biosynthesis protein ATIC	30	5.77906	5.95889	5.1896	5.59526	6.05756	5.32529	5.78525	6.20361	5.34284	5.65776	5.62031	5.23306	5.4701	5.47135	5.25698	5.65995	5.22112	5.172	2056.05	2120.03	1846.33	1990.65	2155.13	1894.6	2058.25	2207.09	1900.85	2012.89	1999.56	1861.79	1946.13	1946.57	1870.3	2013.67	1857.55	1840.07
Q68FL6	Mars1	Methionine--tRNA ligase, cytoplasmic	30	4.48015	4.42601	7.6992	4.57239	4.5367	7.23854	4.50043	4.13718	7.47619	4.79273	4.72086	7.56513	5.0787	4.48458	7.81661	4.67713	4.66136	7.13608	1920.62	1897.41	3300.62	1960.16	1944.86	3103.13	1929.32	1773.59	3205.01	2054.62	2023.81	3243.14	2177.22	1922.52	3350.95	2005.07	1998.31	3059.21
Q921K2	Parp1	Isoform of P11103, Poly [ADP-ribose] polymerase	30	4.58403	6.71304	6.04267	4.27993	6.60126	6.38555	4.1621	6.11526	5.58748	4.81417	6.61451	5.50945	4.75678	6.95476	4.57268	4.59538	6.09114	5.61981	3000.75	4394.42	3955.59	2801.68	4321.25	4180.04	2724.55	4003.11	3657.62	3151.4	4329.92	3606.54	3113.83	4552.65	2993.32	3008.18	3987.32	3678.78
B2RXT3	Ogdhl	Isoform of E9Q7L0, Oxoglutarate dehydrogenase (succinyl-transferring)	30	3.2353	2.68314	10.0566	3.49089	2.74299	10.6904	3.13208	2.78392	9.61556	3.10773	2.92134	10.9449	3.22692	3.03324	12.0512	3.20032	3.15439	9.92915	1303.44	1080.99	4051.61	1406.41	1105.1	4306.96	1261.86	1121.59	3873.93	1252.04	1176.95	4409.48	1300.06	1222.03	4855.19	1289.35	1270.84	4000.27
Q80YX1	Tnc	Tenascin	30	5.21344	1.9145	6.44098	5.73985	1.3419	6.62776	3.86747	1.32259	4.49161	6.17036	1.97759	10.3839	6.50979	2.32213	16.5983	6.46445	2.88118	9.73223	1529.5	561.667	1889.63	1683.94	393.682	1944.43	1134.62	388.016	1317.73	1810.24	580.178	3046.38	1909.82	681.256	4869.54	1896.51	845.27	2855.2
Q9CZD3	Gars1	Glycine--tRNA ligase	30	5.13934	5.04997	5.27283	5.07909	5.02921	5.64814	4.80307	4.69635	4.85607	6.14384	5.44436	6.31134	6.70576	5.92349	6.01472	6.11714	5.67886	6.08643	3723.71	3658.96	3820.43	3680.06	3643.91	4092.36	3480.06	3402.74	3518.46	4451.52	3944.71	4572.88	4858.66	4291.86	4357.97	4432.17	4114.62	4409.92
P80315	Cct4	T-complex protein 1 subunit delta	30	4.97124	4.98781	5.46645	4.70086	5.29422	7.12868	5.55345	5.67444	6.1443	5.22253	5.19216	6.27191	5.45014	5.51417	6.07919	5.40335	5.10648	5.83862	2213.63	2221.01	2434.14	2093.23	2357.45	3174.31	2472.88	2526.75	2735.98	2325.53	2312	2792.8	2426.88	2455.39	2706.98	2406.04	2273.85	2599.86
Q9CZ30	Ola1	Obg-like ATPase 1	30	4.94614	5.86954	6.0348	5.05228	5.85631	5.43931	4.78926	5.83154	5.75621	4.9228	5.76692	6.06591	4.92087	5.74051	6.47544	4.89296	5.63171	6.00749	4337.34	5147.08	5292	4430.41	5135.48	4769.8	4199.77	5113.76	5047.7	4316.87	5057.09	5319.28	4315.18	5033.93	5678.4	4290.7	4938.53	5268.05
V9GX76	Myo6	Isoform of Q64331, Unconventional myosin-6	30	4.85758	6.45813	7.115	4.11613	6.17587	7.47861	4.00372	5.51759	6.34668	4.16381	5.7022	6.2069	4.05366	5.79604	6.01174	4.07702	5.57377	6.34554	3177.15	4224.01	4653.64	2692.2	4039.39	4891.46	2618.67	3608.84	4151.11	2723.39	3729.58	4059.69	2651.34	3790.96	3932.04	2666.62	3645.59	4150.37
O35350	Capn1	Calpain-1 catalytic subunit	30	5.50005	5.37302	4.9779	5.6788	5.62645	4.85457	5.83033	5.63481	4.45913	6.43881	5.84142	5.22106	6.21544	5.99515	5.79076	6.06177	5.53095	4.96957	3427.76	3348.59	3102.34	3539.16	3506.54	3025.48	3633.6	3511.74	2779.04	4012.82	3640.51	3253.89	3873.61	3736.32	3608.94	3777.84	3447.01	3097.15
Q91W50	Csde1	Cold shock domain-containing protein E1	30	5.81248	5.65825	4.63654	5.66315	5.6142	4.72193	6.06748	5.73251	4.45138	6.12716	6.18475	5.04982	6.36018	5.93497	5.07707	6.05006	5.96654	4.89153	2883.68	2807.16	2300.27	2809.59	2785.3	2342.63	3010.18	2844	2208.41	3039.79	3068.36	2505.31	3155.4	2944.44	2518.83	3001.54	2960.11	2426.77
P14152	Mdh1	Malate dehydrogenase, cytoplasmic	30	3.83364	8.06205	5.36007	4.09685	7.5968	5.81953	4.53279	7.02561	6.66801	3.76261	7.15626	5.77108	3.67728	4.77924	5.38973	3.93618	6.40605	6.12622	1366.19	2873.06	1910.16	1459.99	2707.26	2073.9	1615.34	2503.71	2376.27	1340.87	2550.26	2056.63	1310.47	1703.17	1920.73	1402.73	2282.91	2183.19
P27612	Plaa	Phospholipase A-2-activating protein	30	5.16111	5.04081	5.65602	5.09898	5.32348	6.92714	6.23808	6.11737	6.905	5.27067	5.21877	5.59329	5.45534	4.92406	5.21432	5.31922	4.9636	5.57276	2988.92	2919.25	3275.54	2952.94	3082.95	4011.67	3612.62	3542.71	3998.84	3052.37	3022.31	3239.2	3159.31	2851.64	3019.73	3080.48	2874.54	3227.31
P58281	Opa1	Dynamin-like 120 kDa protein, mitochondrial	30	4.57826	5.59376	7.7052	4.40412	5.36727	7.38233	4.15791	4.95366	7.4856	4.07852	5.2331	7.24776	3.86525	4.68733	6.91602	4.21438	4.92576	7.20376	2409.75	2944.25	4055.6	2318.09	2825.04	3885.66	2188.5	2607.34	3940.01	2146.71	2754.42	3814.83	2034.46	2467.15	3640.22	2218.22	2592.65	3791.67
F6SMY7	Mycbp2	Isoform of Q7TPH6, RCR-type E3 ubiquitin transferase (Fragment)	30	8.55089	4.98504	3.73593	8.57669	4.71519	3.48892	8.0356	4.66393	2.96012	7.95083	4.97078	3.68903	8.28108	4.88173	3.73238	8.20157	5.00661	3.57368	3337.94	1945.97	1458.37	3348.01	1840.63	1361.94	3136.79	1820.62	1155.52	3103.7	1940.4	1440.06	3232.62	1905.64	1456.98	3201.58	1954.39	1395.03
Q99PU8	Dhx30	ATP-dependent RNA helicase DHX30	30	5.65582	5.98873	5.77819	5.94545	6.08625	5.40996	5.80053	5.95166	5.7217	5.06476	5.75181	5.19983	5.1981	5.54408	4.78315	5.30787	5.52967	5.28246	1922.58	2035.74	1964.18	2021.03	2068.89	1839	1971.77	2023.14	1944.97	1721.66	1955.21	1767.58	1766.99	1884.6	1625.93	1804.3	1879.7	1795.66
Q6R0H7	Gnas	Guanine nucleotide-binding protein G(s) subunit alpha isoforms XLas	30	6.21146	5.57292	5.3136	5.66077	5.3522	5.43369	5.81386	5.30165	4.55716	6.3279	4.90538	5.41601	6.58042	5.06307	5.84116	6.42203	4.81465	5.41209	2969.21	2663.97	2540.01	2705.96	2558.46	2597.42	2779.14	2534.3	2178.41	3024.86	2344.87	2588.96	3145.57	2420.25	2792.19	3069.86	2301.5	2587.09
Q07076	Anxa7	Annexin A7	30	6.33875	4.5703	6.67674	5.88494	4.57382	6.64592	6.75431	4.83895	7.28532	5.46735	4.01705	5.96325	5.16954	4.13736	5.44033	5.68258	4.11428	6.43917	1621.84	1169.36	1708.32	1505.73	1170.26	1700.43	1728.17	1238.1	1864.03	1398.88	1027.81	1525.76	1322.68	1058.59	1391.97	1453.95	1052.69	1647.53
Q9CVB6	Arpc2	Actin-related protein 2/3 complex subunit 2	30	5.81017	5.3413	6.1727	5.62899	5.60442	6.19623	5.58564	5.81819	5.79922	5.32102	5.22287	5.79885	5.06788	5.14763	6.13526	5.02197	5.09139	5.23628	5610.97	5158.17	5961.06	5436	5412.27	5983.79	5394.13	5618.71	5600.39	5138.59	5043.8	5600.03	4894.12	4971.14	5924.91	4849.79	4916.83	5056.75
Q99KJ8	Dctn2	Dynactin subunit 2	30	5.98699	5.51769	5.60435	5.92464	5.67362	5.15299	5.68559	5.28175	5.79021	5.82015	5.11799	5.3217	5.89144	5.64206	5.26407	5.92373	5.14745	5.25358	3528.22	3251.66	3302.73	3491.48	3343.55	3036.73	3350.61	3112.61	3412.26	3429.91	3016.11	3136.16	3471.91	3324.95	3102.2	3490.94	3033.47	3096.02
Q9D5V5	Cul5	Cullin-5	30	5.27382	5.2471	6.72111	5.57013	5.59074	6.30974	5.19731	5.36234	6.65934	4.96681	5.12662	5.96323	4.81755	5.21963	5.64947	5.05493	5.19071	6.07942	2915.3	2900.53	3715.35	3079.1	3090.49	3487.95	2873.01	2964.23	3681.2	2745.59	2833.93	3296.4	2663.08	2885.35	3122.96	2794.3	2869.36	3360.63
P62983	Rps27a	Ubiquitin-40S ribosomal protein S27a	30	6.01536	5.72641	4.99369	5.04206	5.26135	5.81047	5.1724	5.2963	4.45211	6.37478	5.80737	5.7509	6.12134	6.08391	5.26371	5.90438	5.23934	5.68412	2989.21	2845.62	2481.51	2505.55	2614.52	2887.4	2570.32	2631.89	2212.38	3167.82	2885.86	2857.79	3041.87	3023.27	2615.69	2934.06	2603.58	2824.61
P21981	Tgm2	Protein-glutamine gamma-glutamyltransferase 2	30	2.22639	2.14577	12.7849	2.00975	1.75414	12.3723	2.54579	2.41417	12.2227	1.33437	1.83157	12.0451	1.37936	1.46343	15.7802	1.70612	2.34625	11.6376	1937.53	1867.37	11126.2	1749	1526.55	10767.1	2215.49	2100.95	10636.9	1161.25	1593.94	10482.4	1200.4	1273.56	13732.9	1484.76	2041.85	10127.7
Q99L45	Eif2s2	Eukaryotic translation initiation factor 2 subunit 2	30	4.75289	4.91676	6.92336	4.89134	4.488	6.73077	4.17225	3.96949	5.44603	5.55398	4.95982	7.41216	5.61643	5.47024	7.50289	5.31051	4.77671	7.10636	2010.14	2079.45	2928.1	2068.7	1898.11	2846.64	1764.57	1678.82	2303.29	2348.95	2097.66	3134.83	2375.36	2313.53	3173.2	2245.98	2020.22	3005.49
P09055	Itgb1	Integrin beta-1	30	7.58056	5.16421	5.12765	8.17788	5.07477	3.69364	5.41414	3.53797	3.21149	6.92599	4.74858	5.57187	6.77494	5.66479	5.97921	6.84959	5.17656	5.32617	3689.46	2513.42	2495.63	3980.17	2469.89	1797.69	2635.06	1721.93	1563.03	3370.88	2311.13	2711.83	3297.36	2757.05	2910.08	3333.69	2519.43	2592.24
Q6PGL7	Washc2	WASH complex subunit 2	30	6.74501	4.85188	5.14498	6.47222	4.98204	5.08684	6.22061	4.9601	4.6049	6.49699	5.01797	5.10977	6.46329	5.85283	5.4027	6.31255	4.92568	5.34964	3487.8	2508.87	2660.43	3346.73	2576.18	2630.37	3216.63	2564.83	2381.16	3359.55	2594.75	2642.22	3342.12	3026.46	2793.7	3264.17	2547.03	2766.26
Q8BRF7	Scfd1	Sec1 family domain-containing protein 1	30	6.57612	5.76418	4.71382	6.84576	5.7041	4.21912	6.16366	5.40894	3.66775	6.83452	5.54944	4.59425	6.75273	5.51902	4.71793	6.86133	5.41822	4.68914	3521.33	3086.56	2524.12	3665.72	3054.39	2259.22	3300.47	2896.34	1963.98	3659.7	2971.57	2460.09	3615.9	2955.28	2526.32	3674.05	2901.31	2510.91
P97807	Fh	Fumarate hydratase, mitochondrial	29	3.53004	6.74188	7.66177	3.2496	6.20416	7.92076	3.31535	5.53402	7.73139	3.43389	6.09324	6.99895	3.3528	5.14803	6.55066	3.50114	5.68013	7.35221	3364.56	6425.84	7302.61	3097.26	5913.33	7549.46	3159.93	5274.6	7368.97	3272.92	5807.6	6670.86	3195.63	4906.7	6243.59	3337.02	5413.87	7007.56
Q9ERK4	Cse1l	Exportin-2	29	5.37906	6.20456	5.28073	5.28803	6.25155	5.60795	5.59189	6.1624	5.08382	5.35892	6.0088	5.03609	5.6529	6.05952	4.76859	5.29993	5.97836	4.9869	2443.54	2818.54	2398.87	2402.19	2839.88	2547.52	2540.22	2799.39	2309.42	2434.39	2729.61	2287.74	2567.94	2752.65	2166.22	2407.6	2715.78	2265.4
G3X972	Sec24c	Sec24-related gene family, member C (S. cerevisiae)	29	5.43911	4.24539	5.21203	5.37771	5.00251	7.00018	8.14797	6.30688	7.20787	5.38166	4.68158	5.45038	5.59281	4.53911	5.29109	5.46528	4.65977	4.99867	2780.15	2169.99	2664.08	2748.76	2556.98	3578.07	4164.75	3223.7	3684.23	2750.78	2392.94	2785.9	2858.71	2320.12	2704.49	2793.52	2381.8	2555.02
Q9JMH9	Myo18a	Unconventional myosin-XVIIIa	29	6.71399	4.91878	3.75671	7.02388	5.13063	3.5982	6.62981	5.14531	3.48535	7.15163	5.95791	4.54759	6.90597	7.00802	3.40908	7.48858	6.39897	4.7296	2209.96	1619.05	1236.55	2311.96	1688.78	1184.37	2182.25	1693.61	1147.23	2354.01	1961.09	1496.87	2273.15	2306.74	1122.12	2464.91	2106.27	1556.78
O55029	Copb2	Coatomer subunit beta'	29	6.60416	4.9704	5.56005	6.49029	4.74298	5.14541	6.26959	4.81129	4.6985	6.53588	4.78327	5.20503	6.85125	5.08493	5.50697	6.62996	4.87981	5.23025	2831.44	2130.99	2383.79	2782.62	2033.48	2206.02	2688	2062.77	2014.42	2802.17	2050.76	2231.58	2937.38	2180.09	2361.03	2842.5	2092.15	2242.39
Q9CQV8	Ywhab	14-3-3 protein beta/alpha	29	5.70333	6.83243	5.68239	5.53768	6.49808	5.16092	5.41038	6.09404	5.26281	5.12753	5.96085	4.80136	5.22095	5.31669	4.87775	5.51677	5.91472	5.08133	1604.92	1922.65	1599.03	1558.31	1828.57	1452.29	1522.49	1714.87	1480.96	1442.89	1677.39	1351.11	1469.18	1496.12	1372.6	1552.42	1664.41	1429.89
Q9CZN7	Shmt2	Serine hydroxymethyltransferase, mitochondrial	29	4.57716	4.37089	7.33868	4.34021	4.24468	8.09379	4.33732	4.11269	7.75539	4.79089	4.51442	7.5654	5.02985	4.50109	7.01057	4.94362	5.02339	7.44996	2381.08	2273.77	3817.64	2257.81	2208.12	4210.45	2256.31	2139.45	4034.42	2492.26	2348.44	3935.58	2616.57	2341.5	3646.95	2571.71	2613.21	3875.53
Q920B9	Supt16h	FACT complex subunit SPT16	29	4.9385	5.32024	6.31003	5.02343	5.55376	6.40441	4.85213	5.67358	6.34997	4.91982	5.47428	5.87865	5.44626	5.6437	5.53029	5.08888	5.46395	6.1281	2002.36	2157.14	2558.46	2036.8	2251.83	2596.73	1967.34	2300.41	2574.66	1994.79	2219.6	2383.56	2208.24	2288.29	2242.31	2063.34	2215.41	2484.7
Q02248	Ctnnb1	Catenin beta-1	29	5.06754	3.54686	7.72826	4.66668	3.42391	7.68333	4.6076	3.66859	7.05884	5.69552	4.04841	7.32689	5.79417	5.30064	7.40421	5.42875	4.31026	7.23956	3166.25	2216.11	4828.7	2915.79	2139.3	4800.62	2878.88	2292.18	4410.44	3558.62	2529.49	4577.92	3620.26	3311.89	4626.23	3391.94	2693.09	4523.36
A0A571BDS0	Xirp1	Isoform of O70373, Xin actin-binding repeat-containing protein 1	29	0.681594	1.11389	1.73743	1.63778	2.07743	4.0927	0.959932	1.36248	2.71786	5.70024	9.38229	16.9294	4.18124	10.3712	10.0775	5.1239	9.6305	12.2226	343.702	561.693	876.12	825.874	1047.57	2063.8	484.058	687.047	1370.52	2874.42	4731.14	8536.88	2108.44	5229.83	5081.7	2583.79	4856.3	6163.41
Q6DFZ1	Gbf1	Golgi-specific brefeldin A-resistance factor 1	29	6.46808	5.02079	4.81719	6.52569	5.27803	4.88129	6.68556	5.179	4.42343	6.64496	5.28665	5.1014	6.82862	5.01786	4.92246	6.72935	5.41701	4.77262	3032.81	2354.2	2258.73	3059.82	2474.81	2288.79	3134.78	2428.37	2074.1	3115.75	2478.85	2391.99	3201.87	2352.82	2308.09	3155.32	2539.97	2237.83
Q9ESD7	Dysf	Dysferlin	29	5.63226	4.1507	4.85357	6.43952	4.32751	4.91432	5.94609	4.42905	3.93016	6.81411	5.46437	6.76864	6.97867	6.03954	6.15248	6.36309	5.20275	5.59319	2906.34	2141.83	2504.52	3322.9	2233.07	2535.88	3068.28	2285.46	2028.03	3516.2	2819.71	3492.74	3601.11	3116.5	3174.78	3283.46	2684.71	2886.18
Q8K1X1	Wdr11	WD repeat-containing protein 11	29	6.37412	6.07367	4.93291	6.18146	6.06651	5.13117	6.31429	6.08369	4.89059	6.16879	5.79231	4.43419	5.89063	5.029	4.81603	5.82786	5.41003	4.58276	2095.05	1996.3	1621.35	2031.73	1993.95	1686.52	2075.38	1999.59	1607.44	2027.56	1903.82	1457.43	1936.13	1652.94	1582.93	1915.5	1778.17	1506.26
Q8K1M6	Dnm1l	Dynamin-1-like protein	29	4.98618	5.6238	5.54648	4.61697	5.64107	6.61759	5.37348	6.29264	6.12381	5.09891	5.97103	5.99817	4.84271	5.5413	5.55213	5.00909	5.45974	5.70491	2250.75	2538.57	2503.67	2084.09	2546.37	2987.17	2425.58	2840.49	2764.28	2301.64	2695.31	2707.56	2185.99	2501.33	2506.22	2261.1	2464.52	2575.18
Q8R146	Apeh	Acylamino-acid-releasing enzyme	29	5.04075	4.60287	6.50846	4.61206	4.52996	6.63102	4.77067	4.24284	6.31134	5.53936	4.76253	7.26582	5.49727	4.78846	7.94414	5.42019	4.50943	7.02283	2586.9	2362.18	3340.13	2366.9	2324.77	3403.03	2448.3	2177.42	3238.97	2842.79	2444.12	3728.81	2821.19	2457.43	4076.92	2781.63	2314.23	3604.1
Q3UJB9	Edc4	Enhancer of mRNA-decapping protein 4	29	6.35929	5.60058	4.00915	6.63054	5.39763	3.97311	6.35924	5.61055	3.58126	6.93544	5.95552	4.56726	6.94536	6.29896	4.65048	6.87708	5.93786	4.3107	2464.21	2170.21	1553.53	2569.31	2091.57	1539.57	2464.19	2174.07	1387.73	2687.46	2307.75	1769.8	2691.31	2440.83	1802.05	2664.85	2300.9	1670.38
Q8BHG1	Nrdc	Nardilysin	29	5.63873	5.16458	4.57959	5.46259	4.91563	5.90879	6.57448	5.76168	5.83866	6.09697	5.07301	5.4489	6.20604	5.71011	4.9737	6.16069	5.02791	5.45794	4430.33	4057.79	3598.17	4291.94	3862.19	4642.52	5165.54	4526.93	4587.41	4790.37	3985.85	4281.19	4876.06	4486.41	3907.82	4840.44	3950.41	4288.28
Q8BJ71	Nup93	Nuclear pore complex protein Nup93	29	5.62293	5.43242	5.98295	5.62083	5.69901	6.05079	5.89896	5.45679	5.89596	5.48591	5.10374	5.28779	5.56808	5.45055	5.20038	5.52415	5.22531	5.49345	2633.19	2543.98	2801.79	2632.21	2668.82	2833.56	2762.46	2555.39	2761.05	2569.03	2390.06	2476.25	2607.51	2552.47	2435.31	2586.94	2446.99	2572.56
E9PYF4	Lmo7	LIM domain only 7	29	6.05302	11.2103	1.72771	5.17175	10.9624	1.78484	4.88	12.4682	1.60591	4.1772	8.10811	2.02841	3.04841	9.3473	1.93303	4.06723	9.57021	1.85607	2266.54	4197.67	646.936	1936.55	4104.83	668.33	1827.31	4668.67	601.33	1564.14	3036.06	759.534	1141.47	3500.07	723.82	1522.96	3583.54	695.003
Q61464-4	Znf638	Isoform of Q61464, Isoform 4 of Zinc finger protein 638	29	6.53268	5.90311	5.56087	6.44149	6.02936	5.11003	5.99428	5.57625	4.95175	6.02208	5.65538	4.63029	5.74099	5.75574	4.25147	5.68983	5.34908	4.80533	1993.21	1801.12	1696.7	1965.39	1839.64	1559.14	1828.94	1701.39	1510.85	1837.42	1725.54	1412.77	1751.66	1756.16	1297.19	1736.05	1632.08	1466.17
Q3TKT4	Smarca4	Transcription activator BRG1	29	5.82605	5.95973	5.57855	6.14232	5.87363	5.42866	5.36557	5.55033	4.55574	5.4808	5.78636	5.16007	6.02889	5.91579	4.51326	5.6221	5.87945	5.33273	3233.29	3307.48	3095.94	3408.81	3259.7	3012.75	2977.74	3080.27	2528.3	3041.69	3211.26	2863.69	3345.86	3283.09	2504.73	3120.1	3262.92	2959.51
Q3UE92	Xpnpep1	Isoform of Q6P1B1, Xaa-Pro aminopeptidase 1	29	4.78767	4.91454	7.18149	4.56275	4.91123	7.42587	4.56439	4.52307	6.8895	5.01964	4.76915	6.73833	5.2229	5.02939	6.5534	4.99683	4.85766	7.0522	2355.98	2418.41	3533.96	2245.3	2416.78	3654.22	2246.1	2225.77	3390.27	2470.13	2346.86	3315.88	2570.15	2474.93	3224.88	2458.9	2390.42	3470.34
P27661	H2ax	Histone H2AX	29	6.14871	6.20993	5.49668	6.43625	6.54121	5.33675	6.49121	6.88848	6.05966	5.46972	5.49654	3.82279	5.59867	5.69007	3.40509	5.49198	5.09797	4.31831	6004.26	6064.04	5367.54	6285.05	6387.54	5211.37	6338.71	6726.65	5917.3	5341.22	5367.41	3732.98	5467.14	5556.39	3325.09	5362.96	4978.2	4216.86
Q9QYB1	Clic4	Chloride intracellular channel protein 4	29	6.93572	6.83613	2.20397	7.33436	7.27503	2.22064	8.84407	8.60083	2.90108	6.64258	6.36652	2.63373	6.56604	6.53574	3.19896	6.51569	6.05561	2.33329	3406.54	3357.63	1082.5	3602.34	3573.19	1090.69	4343.85	4224.38	1424.89	3262.56	3126.97	1293.58	3224.97	3210.09	1571.2	3200.24	2974.27	1146.02
Q99L47	St13	Hsc70-interacting protein	29	5.90302	5.18171	5.89957	5.8336	5.08823	5.43755	5.4538	4.8476	6.51393	5.87518	4.68036	5.62767	5.72994	5.20191	5.93812	6.10295	4.76905	5.91579	3902.39	3425.54	3900.1	3856.49	3363.74	3594.67	3605.41	3204.66	4306.24	3883.98	3094.1	3720.35	3787.96	3438.89	3925.59	4034.55	3152.74	3910.82
Q9Z2U1	Psma5	Proteasome subunit alpha type-5	29	4.87713	5.4697	5.93443	5.36803	5.90668	5.83885	6.61162	7.1016	8.3524	4.50498	5.21864	4.81886	4.60939	5.20857	4.81595	4.56082	5.73595	5.06641	1380.49	1548.22	1679.77	1519.44	1671.91	1652.71	1871.45	2010.14	2364.18	1275.15	1477.16	1364	1304.71	1474.31	1363.18	1290.96	1623.59	1434.07
Q640N1	Aebp1	Adipocyte enhancer-binding protein 1	29	5.16492	1.02037	9.7835	4.90028	0.930978	9.89869	3.89256	0.838719	7.74762	6.35956	1.31523	9.76176	7.04567	1.96698	9.62685	7.27969	1.67539	10.7912	1102.08	217.724	2087.57	1045.61	198.649	2112.15	830.583	178.963	1653.16	1356.98	280.64	2082.94	1503.38	419.708	2054.15	1553.32	357.489	2302.6
Q8BP67	Rpl24	60S ribosomal protein L24	29	5.82866	5.27834	4.91361	5.74907	5.85332	5.07557	6.6029	6.10959	5.03298	5.86325	5.80602	4.86871	6.21941	5.75652	5.19346	5.8388	5.42027	4.58953	4157.63	3765.09	3504.92	4100.86	4175.22	3620.45	4709.91	4358.02	3590.07	4182.31	4141.48	3472.9	4436.36	4106.17	3704.54	4164.87	3866.33	3273.75
Q9CZX8	Rps19	40S ribosomal protein S19	29	5.78222	5.58873	5.57657	5.78458	5.62395	5.04311	5.3848	5.30928	5.03152	5.59756	5.63376	5.53019	6.10652	5.91173	5.64684	5.78876	5.37466	5.28522	5706.61	5515.65	5503.65	5708.94	5550.41	4977.16	5314.38	5239.85	4965.72	5524.36	5560.09	5457.87	6026.67	5834.43	5573	5713.06	5304.37	5216.1
P23116	Eif3a	Eukaryotic translation initiation factor 3 subunit A	29	5.85314	5.47231	5.85656	6.5204	5.81183	5.05402	6.22741	6.18167	6.20926	5.05748	5.32747	5.16293	5.50136	5.19312	5.12492	5.25302	5.24568	4.94741	2270.54	2122.81	2271.86	2529.38	2254.51	1960.55	2415.73	2397.98	2408.69	1961.89	2066.62	2002.79	2134.07	2014.51	1988.05	2037.74	2034.89	1919.19
Q00PI9	Hnrnpul2	Heterogeneous nuclear ribonucleoprotein U-like protein 2	29	5.60899	5.25025	4.79814	6.35933	5.71264	5.79192	8.56762	7.93317	7.88119	5.22267	5.14278	3.64787	5.26814	4.97184	3.41676	5.28286	5.23221	3.9116	2099.1	1964.85	1795.65	2379.91	2137.89	2167.56	3206.33	2968.9	2949.44	1954.52	1924.63	1365.17	1971.54	1860.65	1278.68	1977.05	1958.1	1463.87
Q7TMB8	Cyfip1	Cytoplasmic FMR1-interacting protein 1	29	7.13038	5.48751	4.98473	7.00583	5.59987	4.89	6.70435	5.77056	4.42685	6.46733	5.10079	4.41843	6.50921	5.36941	3.99049	6.5551	5.07197	4.51719	2906.9	2237.14	2032.17	2856.12	2282.95	1993.55	2733.22	2352.53	1804.73	2636.59	2079.48	1801.3	2653.66	2188.99	1626.84	2672.37	2067.73	1841.56
Q6P542	Abcf1	ATP-binding cassette sub-family F member 1	29	5.02017	5.41975	5.25778	5.2758	5.32335	6.3604	5.79443	6.13474	5.80867	5.43191	5.33656	5.76027	5.49888	5.33955	5.96618	5.35072	5.31405	5.60676	2042.03	2204.56	2138.68	2146.01	2165.35	2587.19	2356.97	2495.39	2362.76	2209.51	2170.72	2343.07	2236.75	2171.94	2426.83	2176.48	2161.57	2280.63
P47713	Pla2g4a	Cytosolic phospholipase A2	29	8.06023	4.36784	4.32626	8.173	4.09187	3.98665	7.02961	4.19767	3.3468	7.93361	4.15519	4.77394	8.22484	4.3957	5.71029	7.86805	4.72801	4.63045	4677.44	2534.7	2510.57	4742.88	2374.55	2313.5	4079.35	2435.95	1942.18	4603.95	2411.3	2770.37	4772.96	2550.87	3313.74	4565.91	2743.71	2687.1
P01029	C4b	Complement C4-B	29	10.3919	6.22775	1.5163	10.6692	6.14636	1.65478	9.21497	6.24962	1.12213	8.06711	5.51706	1.58727	7.17249	5.28426	1.66808	9.22023	6.1331	2.15738	5308.31	3181.21	774.546	5449.96	3139.63	845.28	4707.12	3192.38	573.196	4120.77	2818.18	810.799	3663.79	2699.26	852.075	4709.8	3132.86	1102.02
Q61191	Hcfc1	Host cell factor 1	29	5.87256	6.0541	5.16646	5.9854	6.44179	5.01522	6.48291	6.6677	5.57855	5.68053	5.69299	4.30393	5.55532	5.80438	4.25071	5.54166	5.58838	4.31741	2563.89	2643.15	2255.61	2613.15	2812.41	2189.58	2830.36	2911.04	2435.53	2480.05	2485.49	1879.04	2425.39	2534.12	1855.81	2419.42	2439.82	1884.93
Q9JIF0	Prmt1	Protein arginine N-methyltransferase 1	29	5.49207	4.48156	6.43617	6.04195	4.769	6.69512	6.41384	5.35589	7.69198	5.31171	4.56397	5.60691	5.55332	4.56601	5.35555	5.29606	4.53765	5.83121	2253.79	1839.11	2641.22	2479.44	1957.06	2747.49	2632.06	2197.9	3156.57	2179.77	1872.92	2300.92	2278.92	1873.76	2197.77	2173.35	1862.12	2392.96
Q9D1A2	Cndp2	Cytosolic non-specific dipeptidase	29	2.68763	3.33714	10.5975	2.46492	2.77098	9.52779	2.63705	2.45473	10.0818	3.08255	3.07414	11.8717	3.33812	3.17431	12.7978	2.84799	2.73709	10.5168	1536.51	1907.84	6058.55	1409.19	1584.16	5447.01	1507.59	1403.36	5763.73	1762.29	1757.48	6787.03	1908.4	1814.75	7316.46	1628.19	1564.79	6012.43
Q9R0P5	Dstn	Destrin	29	4.10536	5.48724	6.53405	3.89823	5.65635	7.07985	4.35934	5.98918	6.92431	4.29725	5.77801	6.07769	4.32352	6.83695	6.57027	4.10676	5.85463	6.121	2896.42	3871.37	4609.92	2750.29	3990.69	4995	3075.62	4225.5	4885.26	3031.81	4076.52	4287.95	3050.34	4823.62	4635.47	2897.42	4130.58	4318.51
O70194	Eif3d	Eukaryotic translation initiation factor 3 subunit D	29	5.63276	5.66175	4.81535	5.43957	5.34515	5.76912	5.59615	5.66662	4.67852	5.90571	5.48513	5.60759	5.9947	6.1651	5.38427	6.0378	5.23558	5.57912	2126.85	2137.79	1818.2	2053.9	2018.25	2178.34	2113.02	2139.63	1766.54	2229.91	2071.1	2117.34	2263.51	2327.85	2033.02	2279.78	1976.88	2106.59
O35074	Ptgis	Prostacyclin synthase	29	10.6635	5.26089	1.68633	10.8608	5.77621	1.71064	10.1439	5.97874	1.07856	8.70827	5.16548	3.27155	6.48352	4.51653	2.50309	8.45957	4.713	3.01939	7324.75	3613.69	1158.34	7460.23	3967.66	1175.03	6967.85	4106.78	740.859	5981.69	3548.15	2247.22	4453.51	3102.39	1719.37	5810.85	3237.35	2074.01
Q9D1D4	Tmed10	Transmembrane emp24 domain-containing protein 10	29	6.26626	4.93294	5.2055	6.15358	5.093	4.94661	5.71071	4.96424	4.74047	6.1805	5.13797	5.80321	6.16433	5.54162	5.77061	6.32378	5.07293	5.99174	2356.72	1855.26	1957.77	2314.34	1915.46	1860.41	2147.78	1867.04	1782.88	2324.47	1932.38	2182.57	2318.39	2084.19	2170.31	2378.35	1907.91	2253.48
A0A087WSP5	Stat1	Isoform of P42225, Signal transducer and activator of transcription	29	6.85561	7.12505	3.42623	5.05639	7.55493	3.06925	4.8	6.39647	2.65191	7.36071	7.95251	2.64701	6.98827	7.7297	2.9899	6.06594	8.31214	3.01799	2832.27	2943.59	1415.49	2088.96	3121.19	1268	1983.04	2642.59	1095.59	3040.95	3285.44	1093.56	2887.08	3193.39	1235.22	2506.04	3434.01	1246.83
Q9D6Z1	Nop56	Nucleolar protein 56	29	4.46924	5.01282	7.68667	4.46293	4.96289	7.8014	4.88875	5.27333	8.12579	4.11398	4.90957	6.94277	4.511	4.64266	6.67042	4.15451	4.86775	6.50352	2386.7	2676.99	4104.9	2383.33	2650.33	4166.17	2610.74	2816.11	4339.41	2196.98	2621.85	3707.64	2409.01	2479.32	3562.2	2218.63	2599.52	3473.07
P27046	Man2a1	Alpha-mannosidase 2	28	4.02587	4.01949	6.67907	3.71105	3.86881	5.72549	3.4745	3.11946	5.24382	5.47071	5.35685	7.24692	7.18031	8.45981	8.61468	5.266	5.41451	7.12265	2045.39	2042.15	3393.37	1885.44	1965.59	2908.9	1765.26	1584.88	2664.18	2779.45	2721.6	3681.88	3648.04	4298.1	4376.78	2675.45	2750.9	3618.74
P97742	Cpt1a	Carnitine O-palmitoyltransferase 1, liver isoform	28	4.63814	3.56362	8.50124	4.84254	3.58595	8.49649	4.98132	3.50475	8.15531	3.96971	3.13082	8.52909	4.43346	3.07351	10.2576	4.44053	3.19342	8.70251	1543.11	1185.62	2828.37	1611.12	1193.05	2826.79	1657.29	1166.04	2713.28	1320.73	1041.63	2837.64	1475.02	1022.56	3412.71	1477.37	1062.46	2895.34
Q2KN98	Specc1l	Cytospin-A	28	7.05433	4.70227	5.528	7.13561	4.74357	5.15521	6.46785	4.79433	4.76336	6.55905	4.42516	5.3245	6.23218	5.17649	5.20584	6.66641	4.56169	5.50416	3696.19	2463.8	2896.46	3738.78	2485.44	2701.12	3388.9	2512.04	2495.82	3436.68	2318.61	2789.83	3265.42	2712.28	2727.66	3492.94	2390.14	2883.96
Q8BML9	Qars1	Glutamine--tRNA ligase	28	4.95316	4.89729	5.8315	4.72591	4.89627	6.42316	5.35732	5.48349	7.75874	5.3821	5.83018	6.54452	4.9025	4.81329	6.47886	4.8934	5.06745	5.76086	2641.21	2611.42	3109.58	2520.03	2610.87	3425.07	2856.72	2924	4137.25	2869.94	3108.87	3489.78	2614.2	2566.63	3454.77	2609.34	2702.16	3071.91
Q99JY0	Hadhb	Trifunctional enzyme subunit beta, mitochondrial	28	4.96965	6.9882	5.84277	4.58097	6.6334	6.09133	4.76827	6.24683	5.53387	4.37573	5.98153	6.19085	4.19292	5.31057	6.10214	4.74305	5.66812	5.7798	4159.07	5848.38	4889.78	3833.79	5551.45	5097.8	3990.54	5227.93	4631.26	3662.03	5005.91	5181.09	3509.03	4444.39	5106.84	3969.43	4743.62	4837.08
Q9QUJ7	Acsl4	Long-chain-fatty-acid--CoA ligase 4	28	1.67603	1.44831	12.0735	1.7269	1.62647	13.2694	1.91146	1.32201	13.4947	2.22987	1.99733	12.6535	2.24051	1.82339	14.1002	2.09614	2.10112	12.2092	953.922	824.311	6871.69	982.874	925.713	7552.33	1087.92	752.426	7680.58	1269.14	1136.79	7201.79	1275.2	1037.79	8025.17	1193.03	1195.86	6948.9
O08528	Hk2	Hexokinase-2	28	2.7642	2.71422	9.35542	2.97229	2.64812	9.9502	2.87593	2.23684	9.0741	3.11109	3.45156	12.368	3.54262	2.78832	12.6537	3.40894	3.39626	10.6881	1301.67	1278.14	4405.5	1399.66	1247.01	4685.58	1354.29	1053.34	4273.03	1465.02	1625.35	5824.14	1668.23	1313.03	5958.68	1605.28	1599.31	5033.09
E9Q0S6	Tns1	Tensin 1	28	8.83887	7.61167	0.695244	8.77046	7.48231	0.703548	8.38577	7.83091	0.288885	7.82201	6.88046	1.24674	7.82624	7.41189	1.51609	8.01125	7.397	1.28066	2783.64	2397.16	218.954	2762.1	2356.42	221.57	2640.95	2466.2	90.979	2463.4	2166.88	392.637	2464.73	2334.24	477.465	2523	2329.55	403.321
Q91YP2	Nln	Neurolysin, mitochondrial	28	3.86213	7.29478	5.43264	3.44446	6.90714	6.55539	4.73501	7.74366	6.89981	4.23129	6.70042	5.98399	3.83905	5.4028	5.83687	3.79343	5.6746	5.66254	1377.66	2602.13	1937.88	1228.68	2463.86	2338.38	1689.03	2762.25	2461.24	1509.35	2390.12	2134.56	1369.43	1927.24	2082.08	1353.16	2024.19	2019.89
P29341	Pabpc1	Polyadenylate-binding protein 1	28	5.70337	5.27753	5.94037	6.14006	5.70546	5.31514	6.67744	6.32672	6.71161	5.46077	5.06847	4.91855	5.58125	4.83693	5.11099	5.39264	4.97761	4.85508	2935.47	2716.29	3057.45	3160.22	2936.54	2735.65	3436.81	3256.3	3454.39	2810.6	2608.69	2531.52	2872.61	2489.52	2630.57	2775.54	2561.93	2498.86
Q9ES00	Ube4b	Ubiquitin conjugation factor E4 B	28	6.23379	5.33209	5.22978	5.8156	5.01446	5.87929	6.2688	5.27017	5.00296	6.08881	4.86678	5.35276	6.48812	4.9601	5.42748	6.44688	4.96382	5.3583	3853.95	3296.49	3233.24	3595.41	3100.12	3634.79	3875.6	3258.21	3093.01	3764.32	3008.82	3309.27	4011.19	3066.52	3355.46	3985.69	3068.81	3312.7
Q07417	Acads	Short-chain specific acyl-CoA dehydrogenase, mitochondrial	28	4.80862	6.8192	5.85952	4.80402	6.67732	5.89665	4.87958	6.35931	6.45064	4.25807	6.12552	5.83604	4.3089	5.19319	5.27507	4.64648	5.92819	5.87368	1577.41	2236.96	1922.14	1575.9	2190.41	1934.33	1600.69	2086.09	2116.06	1396.81	2009.4	1914.44	1413.48	1703.56	1730.42	1524.22	1944.67	1926.79
E9Q3L2	Pi4ka	Phosphatidylinositol 4-kinase alpha	28	7.12971	5.92527	3.7969	6.99382	5.74767	4.12485	6.96891	5.93657	3.64131	6.6905	5.75601	4.3212	6.56335	5.29086	4.66245	6.93896	5.29705	4.2146	1716.73	1426.72	914.241	1684.01	1383.96	993.207	1678.02	1429.44	876.777	1610.98	1385.97	1040.48	1580.36	1273.96	1122.65	1670.8	1275.45	1014.82
Q6ZWX6	Eif2s1	Eukaryotic translation initiation factor 2 subunit 1	28	5.07846	5.02667	6.08314	4.9531	4.99141	6.61851	5.48965	5.06303	6.06292	5.35272	5.20145	6.56394	5.53077	5.16538	6.57395	5.23628	5.00381	6.00481	2719.26	2691.53	3257.22	2652.14	2672.65	3543.88	2939.43	2711	3246.39	2866.11	2785.12	3514.66	2961.45	2765.81	3520.02	2803.77	2679.29	3215.27
Q8BH59	Slc25a12	Calcium-binding mitochondrial carrier protein Aralar1	28	4.35751	3.71056	8.07206	4.51932	3.88804	8.18755	4.81745	4.31518	9.33618	4.24219	4.18983	7.95641	4.391	4.11126	7.08614	4.58873	4.22409	8.00649	2112.7	1799.03	3913.67	2191.15	1885.08	3969.66	2335.7	2092.18	4526.56	2056.79	2031.4	3857.59	2128.94	1993.31	3435.65	2224.8	2048.01	3881.88
Q78ZA7	Nap1l4	Nucleosome assembly protein 1-like 4	28	5.18511	5.69857	5.43564	4.70768	5.61295	6.41077	5.45517	5.77317	6.11278	5.41234	5.65218	5.73874	5.33986	5.71833	5.33848	5.42281	5.3914	5.59401	4353	4784.06	4563.32	3952.19	4712.18	5381.96	4579.72	4846.68	5131.79	4543.76	4745.11	4817.78	4482.91	4800.65	4481.75	4552.55	4526.18	4696.27
P18654	Rps6ka3	Ribosomal protein S6 kinase alpha-3	28	5.47818	6.00381	6.66429	6.06048	5.66489	6.09719	5.20752	5.42766	6.6285	5.03288	5.21587	5.02193	5.12238	5.37801	4.88294	4.99074	5.39983	5.72288	2737.82	3000.52	3330.6	3028.84	2831.14	3047.19	2602.56	2712.58	3312.72	2515.28	2606.73	2509.81	2560.01	2687.76	2440.34	2494.22	2698.67	2860.12
P70335	Rock1	Rho-associated protein kinase 1	28	6.52031	6.19838	4.44713	5.94415	5.84205	4.63488	5.86314	5.57345	3.76373	6.48783	6.48488	4.32499	6.06637	6.79633	4.40469	6.15263	6.13613	4.35896	2325.45	2210.63	1586.05	2119.96	2083.55	1653.02	2091.07	1987.75	1342.32	2313.86	2312.81	1542.5	2163.55	2423.89	1570.92	2194.32	2188.43	1554.61
P50580	Pa2g4	Proliferation-associated protein 2G4	28	5.34947	5.68452	5.38736	5.46866	6.15533	5.33893	5.64957	6.40351	5.94357	5.14413	5.83378	5.12951	5.42717	5.72172	5.33256	5.23051	5.73361	5.0661	4596.6	4884.49	4629.16	4699.02	5289.04	4587.55	4854.46	5502.3	5107.09	4420.16	5012.75	4407.6	4663.37	4916.46	4582.07	4494.38	4926.68	4353.11
D3YWX2	Ylpm1	Isoform of Q9R0I7, YLP motif-containing protein 1	28	5.46952	5.42324	6.66664	5.90697	5.53163	6.01754	5.70175	5.88292	6.84057	5.04882	5.1479	5.55003	4.87226	4.95663	5.32344	4.8024	5.16606	5.69166	1916.4	1900.19	2335.84	2069.67	1938.16	2108.41	1997.77	2061.25	2396.79	1769	1803.71	1944.61	1707.13	1736.69	1865.22	1682.66	1810.08	1994.23
Q8BHN3-2	Ganab	Isoform of Q8BHN3, Isoform 2 of Neutral alpha-glucosidase AB	28	6.34594	5.36111	5.22737	6.90605	5.93867	4.84363	7.3433	6.04172	6.15747	5.91364	4.97915	4.40195	6.09062	4.49707	4.73558	5.87489	4.53632	4.8055	5628.98	4755.41	4636.78	6125.81	5267.73	4296.4	6513.66	5359.13	5461.8	5245.52	4416.61	3904.62	5402.51	3989	4200.55	5211.15	4023.81	4262.58
O88990	Actn3	Alpha-actinin-3	28	1.72394	2.19542	1.15745	3.74355	3.96582	1.67667	2.33663	3.00859	1.00402	9.66414	13.0433	4.00178	7.97339	14.3333	3.36877	9.46746	13.5213	3.81452	517.115	658.541	347.189	1122.92	1189.59	502.936	700.899	902.46	301.169	2898.87	3912.48	1200.38	2391.71	4299.43	1010.5	2839.87	4055.88	1144.21
Q9R0E2	Plod1	Procollagen-lysine,2-oxoglutarate 5-dioxygenase 1	28	7.17157	5.43398	4.90493	7.01856	5.13858	4.74611	6.60957	4.19372	4.37651	7.08437	4.73012	4.56939	7.79631	4.31066	5.02162	7.22461	4.5532	5.11621	2592.25	1964.18	1772.95	2536.95	1857.4	1715.54	2389.11	1515.87	1581.94	2560.73	1709.76	1651.66	2818.07	1558.14	1815.13	2611.43	1645.81	1849.32
Q9EPE9	Atp13a1	Endoplasmic reticulum transmembrane helix translocase	28	4.75698	4.81428	6.5977	4.56946	5.18797	7.08301	5.1098	5.13907	6.97617	4.60448	5.37669	6.71511	5.10167	4.56906	6.85248	4.75303	5.10957	6.68345	1817.71	1839.6	2521.07	1746.05	1982.4	2706.52	1952.52	1963.71	2665.69	1759.43	2054.51	2565.94	1949.42	1745.9	2618.43	1816.2	1952.44	2553.84
Q9R0P3	Esd	S-formylglutathione hydrolase	28	2.92402	2.63854	7.81824	2.91098	2.92218	10.8714	4.78002	4.00641	15.3323	3.0393	2.6863	9.1647	3.09405	2.81535	10.9581	2.94258	2.62585	8.46958	1159.51	1046.3	3100.29	1154.34	1158.78	4311.03	1895.5	1588.73	6079.98	1205.22	1065.24	3634.23	1226.94	1116.42	4345.41	1166.87	1041.27	3358.58
A0A0R4J083	Acadl	Isoform of P51174, Long-chain specific acyl-CoA dehydrogenase, mitochondrial	28	3.52505	8.82439	5.43343	2.84949	7.94851	6.33699	3.26656	6.84829	5.80864	3.45103	7.81776	6.13052	3.4187	5.5329	5.71172	3.71071	7.26338	6.12194	3219.59	8059.74	4962.61	2602.58	7259.76	5787.88	2983.5	6254.88	5305.32	3151.99	7140.34	5599.3	3122.47	5053.47	5216.79	3389.17	6634	5591.46
P29758	Oat	Ornithine aminotransferase, mitochondrial	28	4.69963	4.78595	6.50583	4.69458	5.13612	5.76594	4.50457	4.73864	6.68034	5.09849	5.27414	7.30257	5.57501	5.51729	7.28879	5.10371	5.08747	6.24094	2740.8	2791.14	3794.17	2737.86	2995.36	3362.66	2627.04	2763.55	3895.94	2973.41	3075.85	4258.82	3251.32	3217.65	4250.79	2976.46	2966.99	3639.68
P80317	Cct6a	T-complex protein 1 subunit zeta	28	5.26496	5.1909	6.09754	5.00773	5.42336	6.08415	4.96637	5.41387	5.94357	5.24972	5.19248	6.35301	5.50075	5.56087	6.07733	5.20619	5.25248	6.21473	3837.7	3783.72	4444.58	3650.2	3953.16	4434.82	3620.06	3946.24	4332.35	3826.59	3784.87	4630.8	4009.57	4053.39	4429.85	3794.86	3828.6	4530
P12970	Rpl7a	60S ribosomal protein L7a	28	5.59831	5.40628	4.84726	6.03766	5.63408	5.12926	6.45196	6.25706	5.19139	5.87288	5.66164	4.85244	6.33238	5.66165	5.00402	5.93682	5.49905	4.62583	5927.01	5723.7	5131.86	6392.15	5964.87	5430.41	6830.77	6624.44	5496.2	6217.7	5994.05	5137.34	6704.18	5994.06	5297.83	6285.39	5821.92	4897.43
P62137	Ppp1ca	Serine/threonine-protein phosphatase PP1-alpha catalytic subunit	28	5.09613	4.62693	4.44373	5.04378	4.93937	7.32939	8.61758	7.43494	7.9458	5.73413	5.15914	4.89343	5.32376	4.50323	4.67074	5.08179	4.94921	4.20693	2125.89	1930.16	1853.74	2104.05	2060.49	3057.51	3594.89	3101.54	3314.65	2392.03	2152.17	2041.33	2220.84	1878.55	1948.43	2119.91	2064.6	1754.95
O88544	Cops4	COP9 signalosome complex subunit 4	28	5.86146	5.53784	5.47301	6.16347	5.67331	5.17541	6.14468	5.9969	5.53374	5.65305	5.2962	5.16598	5.65196	5.29801	5.16479	5.78812	5.23725	5.18482	1922.23	1816.1	1794.84	2021.27	1860.53	1697.24	2015.11	1966.65	1814.75	1853.88	1736.86	1694.15	1853.53	1737.45	1693.76	1898.18	1717.52	1700.33
Q3UU96	Cdc42bpa	Serine/threonine-protein kinase MRCK alpha	28	5.7696	6.30869	5.11166	5.83439	6.66848	4.82455	5.91773	7.26414	5.12071	5.37787	6.13445	4.35364	4.97119	6.0063	4.51249	5.27223	6.03357	4.5183	1864.96	2039.21	1652.29	1885.9	2155.51	1559.48	1912.84	2348.05	1655.21	1738.33	1982.89	1407.26	1606.88	1941.47	1458.61	1704.19	1950.28	1460.49
Q7TT50	Cdc42bpb	Serine/threonine-protein kinase MRCK beta	28	6.49453	6.42512	4.8659	6.3383	6.06702	4.71395	6.30194	6.27645	4.59054	5.8789	5.64176	4.35135	5.90121	5.96019	4.26539	5.71641	5.61756	4.59345	3014.57	2982.35	2258.61	2942.05	2816.13	2188.08	2925.17	2913.34	2130.79	2728.81	2618.74	2019.77	2739.17	2766.54	1979.87	2653.39	2607.5	2132.14
P40124	Cap1	Adenylyl cyclase-associated protein 1	28	5.51176	4.3057	6.38314	5.65299	4.45653	6.81922	6.74038	5.58598	8.22644	5.48089	4.15727	5.5324	5.19299	4.6914	6.21465	5.02936	4.22009	5.79882	3641.15	2844.41	4216.8	3734.45	2944.05	4504.88	4452.8	3690.19	5434.51	3620.76	2746.36	3654.79	3430.57	3099.21	4105.49	3322.47	2787.85	3830.79
G3X9K3	Arfgef1	Brefeldin A-inhibited guanine nucleotide-exchange protein 1	28	6.73213	4.69992	5.29886	7.10887	5.19227	5.26776	7.97969	5.72638	5.87047	5.96253	4.81218	4.39621	6.36707	4.33084	4.48479	6.42331	4.8474	4.49932	3243.5	2264.4	2552.96	3425.01	2501.61	2537.98	3844.57	2758.93	2828.36	2872.71	2318.48	2118.07	3067.61	2086.57	2160.74	3094.71	2335.45	2167.74
P59325	Eif5	Eukaryotic translation initiation factor 5	28	5.90984	5.11508	5.36336	5.58094	5.18645	5.26204	5.56045	4.8055	4.9485	6.1561	5.33842	5.58843	6.59529	5.62436	6.19378	5.94888	5.26621	5.55639	2729.73	2362.63	2477.31	2577.81	2395.6	2430.51	2568.35	2219.64	2285.69	2843.47	2465.79	2581.27	3046.33	2597.87	2860.88	2747.76	2432.44	2566.47
Q3U1J4	Ddb1	DNA damage-binding protein 1	28	6.69349	5.31493	4.08683	7.18792	5.53391	4.36993	7.51607	5.75798	4.07051	6.83518	5.3105	3.92395	7.08577	5.69601	3.80004	7.21019	5.35389	4.25288	3083.81	2448.68	1882.88	3311.6	2549.57	2013.31	3462.79	2652.81	1875.36	3149.09	2446.64	1807.84	3264.54	2624.26	1750.75	3321.86	2466.63	1959.38
Q9EP71	Rai14	Ankycorbin	28	6.39715	5.47509	4.84024	6.23155	5.66394	4.51979	6.68528	5.99835	4.40857	6.86653	5.55066	4.55468	6.71161	5.78885	4.77396	6.10542	5.30704	4.12127	3169.83	2712.95	2398.37	3087.78	2806.52	2239.59	3312.6	2972.22	2184.48	3402.41	2750.39	2256.88	3325.65	2868.42	2365.53	3025.28	2629.68	2042.12
Q9Z2I8	Suclg2	Succinate--CoA ligase [GDP-forming] subunit beta, mitochondrial	28	4.90153	7.13814	6.05654	4.80948	6.61719	5.83762	4.75043	6.30178	5.83466	4.52811	6.10952	5.45008	4.36215	5.18704	5.49409	4.75253	6.11519	5.7539	3316.81	4830.3	4098.4	3254.52	4477.78	3950.25	3214.56	4264.35	3948.25	3064.12	4134.25	3688.01	2951.82	3510.01	3717.79	3215.99	4138.08	3893.6
P54823	Ddx6	Probable ATP-dependent RNA helicase DDX6	28	5.86036	5.71462	5.39614	6.41673	5.78499	4.9009	6.7484	6.44604	5.94185	5.59242	5.4803	4.57222	5.6929	5.1883	4.52065	5.62177	5.37469	4.74672	3640.63	3550.09	3352.24	3986.26	3593.81	3044.58	4192.31	4004.47	3691.25	3474.18	3404.52	2840.4	3536.6	3223.12	2808.36	3492.41	3338.91	2948.8
Q99K85	Psat1	Phosphoserine aminotransferase	28	4.89486	5.62842	4.95437	4.85651	5.79153	5.10314	4.93997	5.40821	4.92716	6.0869	5.92189	5.27385	7.09958	6.35927	5.67144	5.62946	6.18251	5.27093	2554.92	2937.8	2585.98	2534.9	3022.94	2663.63	2578.46	2822.86	2571.77	3177.11	3090.99	2752.74	3705.69	3319.28	2960.26	2938.34	3227.02	2751.21
Q9D4H1	Exoc2	Exocyst complex component 2	28	5.67439	4.75828	5.87918	5.34466	4.70196	6.12125	5.23482	4.66394	5.50366	6.40853	5.3329	6.22123	5.87593	5.13566	6.2006	5.90838	5.16338	5.87125	3184.9	2670.71	3299.85	2999.83	2639.1	3435.71	2938.18	2617.76	3089.07	3596.95	2993.23	3491.83	3298.02	2882.52	3480.25	3316.24	2898.08	3295.39
P24270	Cat	Catalase	28	3.63524	10.9405	2.39478	3.05274	12.3748	2.65294	5.49264	19.9829	3.55995	2.48015	8.08091	2.18942	2.75083	5.62386	2.2502	2.9585	7.47763	2.10196	1438.87	4330.41	947.883	1208.31	4898.12	1050.07	2174.06	7909.47	1409.07	981.674	3198.52	866.601	1088.81	2226	890.656	1171.01	2959.74	831.981
O54724	Cavin1	Caveolae-associated protein 1	28	5.93083	8.79147	2.29141	5.84559	8.73212	2.18823	5.57026	7.88776	2.34824	5.95527	8.78188	2.40322	5.62319	8.50743	2.59893	5.97039	7.99938	2.57441	2200.96	3262.56	850.352	2169.33	3240.53	812.064	2067.15	2927.19	871.445	2210.03	3259	891.848	2086.8	3157.15	964.477	2215.64	2968.61	955.376
Q8JZN5	Acad9	Complex I assembly factor ACAD9, mitochondrial	28	3.45298	7.50501	6.85698	3.2616	7.71673	7.31001	3.66826	7.7859	7.52564	2.66503	6.43751	6.62572	2.82037	4.25134	6.27791	3.18597	5.86661	6.78642	2062.98	4483.88	4096.71	1948.64	4610.37	4367.37	2191.61	4651.69	4496.2	1592.22	3846.09	3958.54	1685.03	2539.97	3750.74	1903.46	3505.01	4054.55
P60843	Eif4a1	Eukaryotic initiation factor 4A-I	28	5.93556	5.7396	5.42507	5.74137	5.49355	4.84966	5.77916	5.18723	4.43455	6.22823	5.72827	5.06741	6.46989	5.59849	5.21806	6.18408	5.7825	5.1373	2143.42	2072.65	1959.07	2073.29	1983.8	1751.28	2086.94	1873.19	1601.38	2249.11	2068.56	1829.92	2336.38	2021.7	1884.32	2233.16	2088.15	1855.16
Q9DB77	Uqcrc2	Cytochrome b-c1 complex subunit 2, mitochondrial	28	3.52066	5.93635	7.35404	3.50263	5.94195	7.24683	3.38502	5.12399	7.04063	3.59428	5.87783	7.7273	3.65531	5.44972	7.30622	3.78217	5.61288	7.9422	2153.34	3630.85	4497.95	2142.31	3634.28	4432.38	2070.38	3133.99	4306.26	2198.37	3595.06	4726.25	2235.7	3333.21	4468.7	2313.29	3433.01	4857.69
Q8R2P8	Kars	Isoform of Q99MN1, Lysine--tRNA ligase	28	5.10938	5.19637	5.88827	4.9714	5.23353	5.9318	4.86127	5.1314	5.8333	5.37566	5.41645	6.53999	5.55641	5.70736	6.18713	5.34097	5.48364	6.23567	3573.16	3634	4117.86	3476.67	3659.98	4148.31	3399.65	3588.56	4079.42	3759.38	3787.9	4573.64	3885.79	3991.35	4326.87	3735.12	3834.89	4360.81
Q8R1F1	Niban2	Protein Niban 2	28	7.37791	5.13277	3.98631	7.46521	5.15651	3.687	7.38988	5.38451	3.16047	7.27881	5.2297	4.27116	7.12122	6.0023	4.51783	7.34993	5.26962	4.21885	2858.57	1988.69	1544.5	2892.4	1997.89	1428.53	2863.21	2086.23	1224.53	2820.18	2026.25	1654.86	2759.12	2325.6	1750.44	2847.73	2041.72	1634.59
O08739	Ampd3	AMP deaminase 3	28	1.78676	1.26431	12.8078	1.72497	0.992323	14.6538	1.88816	0.92052	13.9017	2.26041	1.53635	12.7901	2.93685	1.76631	12.0201	2.38711	1.73074	12.6316	1176.83	832.723	8435.73	1136.13	653.584	9651.61	1243.62	606.291	9156.24	1488.8	1011.9	8424.07	1934.33	1163.36	7916.9	1572.24	1139.93	8319.7
P61161	Actr2	Actin-related protein 2	28	5.68153	5.09894	6.93751	6.32217	5.81791	5.77211	5.18365	6.08204	6.93188	4.73662	4.78377	5.85555	4.77829	4.66343	6.30517	4.72969	4.74848	5.57126	2208.12	1981.69	2696.25	2457.1	2261.12	2243.32	2014.62	2363.77	2694.06	1840.88	1859.2	2275.75	1857.08	1812.44	2450.5	1838.19	1845.49	2165.26
P35235	Ptpn11	Tyrosine-protein phosphatase non-receptor type 11	28	5.22561	4.47791	6.28551	5.26087	4.44637	6.53372	5.38171	4.53982	6.04026	5.87765	4.70328	6.93696	5.71273	4.90677	6.68809	5.77283	4.50095	6.70897	2080.66	1782.95	2502.68	2094.7	1770.39	2601.51	2142.81	1807.6	2405.03	2340.28	1872.69	2762.07	2274.62	1953.71	2662.97	2298.55	1792.13	2671.28
P63037	Dnaja1	DnaJ homolog subfamily A member 1	28	4.84723	6.23496	5.66928	5.13767	6.33676	5.61076	5.19548	6.21064	6.33542	4.60129	5.61077	5.68661	5.01658	5.11366	6.65469	4.73543	5.41257	5.59021	1949.84	2508.07	2280.52	2066.67	2549.02	2256.98	2089.93	2498.29	2548.48	1850.91	2256.98	2287.49	2017.96	2057.01	2676.91	1904.87	2177.25	2248.71
Q5XJY5	Arcn1	Coatomer subunit delta	28	6.45134	4.84908	5.47832	6.68687	5.03725	4.98756	6.36981	4.81802	4.73525	6.58552	4.71406	5.3001	6.83903	5.03062	5.38694	6.76997	4.68576	5.27448	3767.11	2831.5	3198.93	3904.64	2941.38	2912.37	3719.5	2813.37	2765.04	3845.46	2752.66	3094.87	3993.49	2937.51	3145.58	3953.17	2736.14	3079.91
P16045	Lgals1	Galectin-1	28	4.91725	4.99343	6.41195	5.46611	5.32385	5.6443	4.96217	4.96008	6.52231	4.96424	5.09695	6.77161	4.84848	5.84275	7.52479	4.56086	5.03366	6.15521	3829.54	3888.87	4993.61	4256.99	4146.2	4395.76	3864.52	3862.9	5079.56	3866.14	3969.49	5273.71	3775.98	4550.32	5860.29	3551.99	3920.2	4793.66
Q61171	Prdx2	Peroxiredoxin-2	28	5.76202	6.11141	5.52136	5.67725	6.32884	5.52254	5.52498	6.24232	5.74418	5.20464	5.2802	4.97296	5.49163	5.60156	5.0245	5.53294	5.23415	5.22252	3109.84	3298.41	2979.95	3064.09	3415.76	2980.59	2981.91	3369.06	3100.21	2809.01	2849.79	2683.97	2963.9	3023.23	2711.79	2986.2	2824.94	2818.66
Q6ZWN5	Rps9	40S ribosomal protein S9	28	5.65638	5.77306	5.29208	5.57422	5.34072	5.44017	4.98709	5.22841	4.34437	5.76199	5.63049	5.74813	6.07922	6.16737	6.02677	5.93319	5.53946	5.47689	4339.57	4429.09	4060.08	4276.54	4097.4	4173.69	3826.09	4011.23	3332.99	4420.59	4319.7	4409.96	4663.97	4731.6	4623.73	4551.94	4249.87	4201.86
Q60575	Kif1b	Kinesin-like protein KIF1B	27	6.29219	5.4987	4.99359	6.39469	5.61607	4.66792	5.88551	5.3495	4.03408	6.29842	5.38832	5.05079	6.6463	5.97503	5.08415	6.38361	5.51517	4.92597	2310.12	2018.8	1833.35	2347.75	2061.89	1713.78	2160.81	1964.02	1481.07	2312.41	1978.27	1854.35	2440.13	2193.68	1866.6	2343.68	2024.84	1808.52
Q8CFQ3	Aqr	RNA helicase aquarius	27	5.56082	5.68021	6.05352	5.62574	5.73151	6.2477	5.38531	5.47568	5.74388	5.34893	5.89414	5.46717	5.25207	5.26976	4.91883	5.23372	5.77523	5.33576	1653.91	1689.42	1800.45	1673.22	1704.68	1858.21	1601.71	1628.59	1708.36	1590.89	1753.05	1626.06	1562.08	1567.34	1462.97	1556.63	1717.68	1586.97
Q9DBR1	Xrn2	5'-3' exoribonuclease 2	27	6.19164	6.11109	4.63189	6.44357	6.43936	4.85168	6.89685	6.69306	4.86094	5.75111	5.75225	4.17894	5.73273	5.88152	4.00424	5.64587	5.71344	4.2198	2984.3	2945.48	2232.52	3105.73	3103.7	2338.45	3324.21	3225.98	2342.92	2771.97	2772.52	2014.2	2763.11	2834.82	1930	2721.25	2753.81	2033.9
Q91YW3	Dnajc3	DnaJ homolog subfamily C member 3	27	6.42074	4.39575	5.66849	6.23955	4.31013	5.40494	6.11362	3.85816	5.15335	6.5255	4.83226	6.05951	7.13409	4.53538	6.43808	6.58071	4.60376	5.72599	3952.7	2706.09	3489.61	3841.16	2653.38	3327.36	3763.63	2375.14	3172.48	4017.19	2974.81	3730.32	4391.85	2792.05	3963.38	4051.18	2834.14	3525
Q9ERD7	Tubb3	Tubulin beta-3 chain	27	4.95042	4.33077	6.21859	5.57363	4.44026	5.4072	5.33995	4.39088	6.12261	5.91554	4.98424	6.28567	6.74297	6.1376	6.6123	5.34008	5.29665	5.91064	1955.85	1711.04	2456.89	2202.08	1754.29	2136.32	2109.75	1734.78	2418.97	2337.16	1969.21	2483.39	2664.07	2424.9	2612.44	2109.81	2092.65	2335.22
P02469	Lamb1	Laminin subunit beta-1	27	4.85617	5.28409	7.24151	5.24969	4.87994	5.84687	4.29286	3.94608	6.36534	5.36451	5.06924	6.9923	5.55093	5.0711	7.07997	5.13413	5.03037	6.7449	2634.24	2866.37	3928.18	2847.71	2647.14	3171.65	2328.67	2140.56	3452.9	2909.99	2749.82	3793	3011.12	2750.83	3840.55	2785.02	2728.74	3658.79
Q6A009	Ltn1	E3 ubiquitin-protein ligase listerin	27	5.76039	4.95162	5.33753	5.64143	4.92165	5.92379	5.98744	4.82076	4.72926	5.96995	5.41345	5.64836	6.4438	5.36754	5.61992	6.39208	5.50272	5.56831	2706.33	2326.35	2507.66	2650.44	2312.27	2783.1	2813	2264.87	2221.88	2804.78	2543.33	2653.69	3027.4	2521.76	2640.33	3003.11	2585.27	2616.08
Q8CGY8	Ogt	UDP-N-acetylglucosamine--peptide N-acetylglucosaminyltransferase 110 kDa subunit	27	5.78734	5.88952	5.19577	5.93913	6.53663	5.0936	6.11025	6.8069	5.43241	5.35751	5.98694	4.50866	5.41148	5.82575	4.30363	5.41119	5.88911	4.51419	4515.47	4595.19	4053.9	4633.89	5100.08	3974.19	4767.41	5310.96	4238.54	4180.1	4671.2	3517.8	4222.21	4545.43	3357.83	4221.98	4594.87	3522.11
Q3TXS7	Psmd1	26S proteasome non-ATPase regulatory subunit 1	27	5.46403	5.77456	5.55198	5.37171	5.80313	5.45179	6.00624	5.7217	6.42021	5.47797	5.6382	5.40789	5.43958	5.40453	5.03229	5.42407	5.24695	5.36317	1769.89	1870.47	1798.38	1739.98	1879.73	1765.92	1945.52	1853.35	2079.61	1774.4	1826.3	1751.7	1761.97	1750.62	1630.04	1756.94	1699.57	1737.22
Q6URW6	Myh14	Myosin-14	27	6.36525	5.74767	4.27722	6.87555	5.89779	3.96573	6.46117	6.15839	3.81927	6.17269	5.51687	4.69389	5.94311	6.78652	5.33831	5.87588	5.84133	4.26335	6960.86	6285.5	4677.45	7518.91	6449.66	4336.81	7065.76	6734.65	4176.65	6750.28	6033.1	5133.11	6499.22	7421.56	5837.83	6425.7	6387.92	4662.28
Q6Q899	Ddx58	Antiviral innate immune response receptor RIG-I	27	8.39633	5.96961	3.14726	6.47418	5.79965	2.81502	6.39766	5.76337	2.0105	8.5082	6.18405	2.74747	7.96864	7.20376	3.53938	7.51764	6.41417	3.14312	3773.11	2682.6	1414.3	2909.34	2606.23	1265	2874.96	2589.92	903.469	3823.38	2778.96	1234.65	3580.92	3237.2	1590.51	3378.25	2882.38	1412.44
Q9CR16	Ppid	Peptidyl-prolyl cis-trans isomerase D	27	5.88479	6.22488	4.66017	6.15873	7.17281	4.53515	6.40223	7.29482	5.41155	5.32859	5.92501	4.14276	5.32877	5.63342	3.92003	5.62754	5.70864	4.6401	4522.01	4783.34	3580.98	4732.51	5511.75	3484.91	4919.61	5605.5	4158.35	4094.61	4552.91	3183.39	4094.75	4328.84	3012.24	4324.33	4386.64	3565.55
P70206	Plxna1	Plexin-A1	27	4.97121	5.23324	5.76367	4.85617	5.46476	5.90344	4.74494	5.20792	5.8466	5.86448	5.3357	6.32724	5.97134	5.58319	6.63367	5.29931	4.94306	6.05004	1552.91	1634.76	1800.46	1516.97	1707.08	1844.12	1482.23	1626.85	1826.36	1831.95	1666.77	1976.5	1865.33	1744.08	2072.23	1655.4	1544.11	1889.91
P61222	Abce1	ATP-binding cassette sub-family E member 1	27	5.29717	5.24345	5.61828	5.45154	5.38037	5.47315	5.40403	5.06887	5.17917	5.58437	5.47892	5.87185	6.03691	5.678	6.17733	5.66973	5.75071	5.63616	2266.76	2243.77	2404.17	2332.82	2302.37	2342.07	2312.49	2169.07	2216.27	2389.66	2344.54	2512.68	2583.31	2429.73	2643.4	2426.19	2460.84	2411.82
E9Q4X2	Uggt2	UDP-glucose glycoprotein glucosyltransferase 2	27	7.68465	4.50508	4.491	8.26701	4.43661	4.76467	7.7973	4.49467	4.08488	7.55955	4.67167	4.2469	7.25681	4.54803	4.09568	7.79837	4.63842	4.65871	2651.08	1554.18	1549.32	2851.98	1530.56	1643.73	2689.94	1550.59	1409.22	2607.92	1611.65	1465.11	2503.48	1568.99	1412.94	2690.31	1600.18	1607.18
Q9QXX4	Slc25a13	Calcium-binding mitochondrial carrier protein Aralar2	27	6.61576	3.80226	7.6434	7.29815	3.97245	6.86838	7.04308	4.14902	7.06422	6.12165	3.44168	5.62119	5.74217	3.20578	4.75589	6.81661	3.71065	6.12764	4250.16	2442.69	4910.35	4688.55	2552.02	4412.45	4524.68	2665.46	4538.26	3932.73	2211.04	3611.22	3688.94	2059.49	3055.32	4379.19	2383.83	3936.58
Q9Z1X4	Ilf3	Interleukin enhancer-binding factor 3	27	5.61565	5.20503	6.28098	5.60116	5.25209	6.62637	5.67877	5.27204	6.08624	5.52804	5.09328	5.42852	5.57101	5.31395	5.20057	5.56505	4.83855	5.8427	1870.47	1733.7	2092.08	1865.64	1749.37	2207.12	1891.49	1756.02	2027.21	1841.29	1696.48	1808.14	1855.6	1769.98	1732.21	1853.61	1611.63	1946.1
Q9WVK4	Ehd1	EH domain-containing protein 1	27	4.96644	6.41503	5.29556	5.49237	7.02216	4.54452	5.34134	6.70054	6.42872	4.62078	6.20493	5.09357	4.7831	6.06084	5.82825	4.52939	5.84617	4.8263	2936.56	3793.08	3131.17	3247.53	4152.07	2687.09	3158.23	3961.9	3801.18	2732.18	3668.85	3011.73	2828.15	3583.66	3446.13	2678.14	3456.73	2853.7
Q8BTZ4	Anapc5	Anaphase-promoting complex subunit 5	27	6.0433	6.31824	4.75255	5.96149	6.23318	4.54613	5.71717	5.93877	4.00064	5.8884	6.04147	4.82571	6.13535	6.04098	4.59607	6.13144	6.21326	4.61585	2628.48	2748.06	2067.08	2592.9	2711.07	1977.3	2486.64	2583.02	1740.04	2561.11	2627.69	2098.9	2668.52	2627.47	1999.02	2666.82	2702.41	2007.62
E9QQ10	Akap9	Isoform of Q70FJ1, A-kinase anchor protein 9	27	5.82703	5.99233	4.96652	5.98263	5.86437	4.62314	5.61365	5.26853	4.29427	6.08105	6.18686	5.22021	6.10408	5.89094	5.03626	5.86941	5.91986	5.25886	2521.08	2592.6	2148.78	2588.4	2537.23	2000.21	2428.76	2279.44	1857.93	2630.98	2676.76	2258.54	2640.94	2548.73	2178.95	2539.41	2561.24	2275.26
Q61147	Cp	Ceruloplasmin	27	10.99	7.91778	0.317809	10.4225	6.92217	0.369808	10.8502	8.20477	0.081942	7.85666	5.66667	0.417179	5.94483	5.79958	0.523827	9.52229	7.52437	0.667684	4790.76	3451.53	138.54	4543.37	3017.52	161.207	4729.85	3576.64	35.7203	3424.89	2470.22	181.857	2591.48	2528.16	228.347	4150.97	3280.04	291.058
E9PZJ8	Ascc3	Activating signal cointegrator 1 complex subunit 3	27	5.4976	4.23998	7.09805	5.7711	4.42103	6.54204	5.46955	3.82904	6.12463	5.66672	4.65377	6.59577	6.0088	4.54007	6.61003	5.77963	4.85852	6.29365	2108.03	1625.8	2721.71	2212.9	1695.22	2508.51	2097.27	1468.23	2348.46	2172.88	1784.47	2529.12	2304.05	1740.87	2534.59	2216.17	1862.97	2413.27
Q01405	Sec23a	Protein transport protein Sec23A	27	6.65278	4.76675	5.05069	6.81522	4.70103	4.96388	6.71681	4.72347	4.74385	6.80506	4.73519	5.26903	7.24801	4.90109	5.4238	6.68622	4.58173	5.21538	2178.15	1560.65	1653.62	2231.33	1539.14	1625.19	2199.11	1546.48	1553.15	2228	1550.32	1725.1	2373.03	1604.64	1775.77	2189.09	1500.08	1707.54
P29533	Vcam1	Vascular cell adhesion protein 1	27	4.88527	4.51534	4.92109	4.36253	4.10571	4.95041	3.68719	4.04992	4.50321	5.23984	4.34531	8.70089	5.57456	5.23968	16.3954	4.37158	4.11568	6.03639	3674.05	3395.84	3700.99	3280.92	3087.77	3723.04	2773.02	3045.81	3386.72	3940.71	3267.96	6543.65	4192.44	3940.59	12330.4	3287.72	3095.27	4539.77
Q8BH95	Echs1	Enoyl-CoA hydratase, mitochondrial	27	4.55505	7.69155	4.90673	4.78409	8.30151	5.84793	6.77261	9.85654	7.59725	3.6907	6.34273	3.98526	3.71359	4.06194	4.18545	3.88668	5.84893	3.97145	3356.3	5667.37	3615.43	3525.07	6116.81	4308.94	4990.27	7262.6	5597.89	2719.42	4673.52	2936.46	2736.29	2992.97	3083.97	2863.82	4309.67	2926.29
P05622	Pdgfrb	Platelet-derived growth factor receptor beta	27	7.91457	4.68145	2.60781	8.57383	4.9202	2.45187	7.85992	4.99004	1.73339	9.31683	5.69195	2.6766	9.55503	6.91662	2.94239	9.04356	5.26067	2.86327	1781.89	1053.98	587.125	1930.32	1107.74	552.015	1769.59	1123.46	390.257	2097.6	1281.49	602.611	2151.22	1557.21	662.451	2036.07	1184.39	644.638
P26618	Pdgfra	Platelet-derived growth factor receptor alpha	27	4.99006	7.04497	5.30693	4.727	7.57485	5.13889	4.77877	7.09718	5.34981	5.20878	5.78569	3.86953	6.46137	7.09725	3.56062	5.68474	5.92285	4.40069	2000.55	2824.37	2127.58	1895.08	3036.8	2060.21	1915.84	2845.3	2144.77	2088.23	2319.52	1551.32	2590.4	2845.33	1427.47	2279.05	2374.51	1764.26
O08810	Eftud2	116 kDa U5 small nuclear ribonucleoprotein component	27	6.01466	5.5119	5.84084	6.30085	5.73584	5.7032	6.18453	5.80803	5.77712	5.49256	5.56312	4.84756	5.53633	5.30131	4.78933	5.36167	5.30786	4.92327	2698.46	2472.9	2620.48	2826.86	2573.37	2558.72	2774.67	2605.76	2591.89	2464.22	2495.88	2174.84	2483.86	2378.42	2148.72	2405.5	2381.35	2208.81
Q01149	Col1a2	Collagen alpha-2(I) chain	27	7.61338	6.19959	2.43998	7.26081	5.67707	2.04603	6.3273	5.76437	1.49124	8.17975	6.81576	2.4427	9.38234	8.72186	3.26732	7.12317	6.27604	2.97129	1924.46	1567.09	616.761	1835.34	1435.01	517.182	1599.37	1457.08	376.945	2067.62	1722.84	617.448	2371.6	2204.65	825.89	1800.54	1586.41	751.062
Q61584-3	Fxr1	Isoform of Q61584, Isoform B of Fragile X mental retardation syndrome-related protein 1	27	6.03173	4.42008	4.61772	6.08471	4.60804	4.49631	5.67049	4.4623	4.11054	6.84501	5.77265	5.54158	6.96805	6.71386	5.06213	7.13168	5.95157	5.51154	1918.27	1405.71	1468.57	1935.12	1465.49	1429.96	1803.38	1419.14	1307.27	2176.91	1835.87	1762.39	2216.04	2135.2	1609.91	2268.08	1892.77	1752.83
Q80X82	Sympk	Symplekin	27	5.83848	6.09579	4.97048	6.00457	6.0138	5.31507	5.89699	6.02697	4.68269	5.82713	5.88492	4.7389	5.87202	5.96965	4.50165	5.76766	5.98697	4.60624	3051.43	3185.92	2597.78	3138.24	3143.07	2777.88	3082.02	3149.95	2447.37	3045.5	3075.71	2476.75	3068.96	3119.99	2352.75	3014.42	3129.04	2407.42
O88738	Birc6	Baculoviral IAP repeat-containing protein 6	27	5.52224	5.99044	4.60458	6.36967	6.10698	4.10234	5.85305	5.84693	4.19401	6.37529	6.51708	4.69693	6.47327	6.00516	4.37129	6.02591	6.21058	4.73426	1998.44	2167.87	1666.35	2305.11	2210.04	1484.59	2118.15	2115.94	1517.76	2307.14	2358.46	1699.76	2342.6	2173.2	1581.92	2180.71	2247.54	1713.27
Q9CQE8	RTRAF	RNA transcription, translation and transport factor protein	27	5.18062	5.67716	6.14688	5.42722	5.9537	5.31185	5.0331	5.69454	6.58811	5.15769	5.22383	5.79036	5.36085	5.63495	5.69697	5.45797	5.10448	5.55973	4110.22	4504.17	4876.84	4305.87	4723.57	4214.34	3993.19	4517.96	5226.91	4092.03	4144.5	4593.98	4253.22	4470.68	4519.89	4330.27	4049.81	4411
Q8R0G9	Nup133	Nuclear pore complex protein Nup133	27	5.86985	5.49469	5.85575	5.44706	5.31057	6.23004	5.77151	5.08138	5.37224	5.62222	5.68047	5.44004	5.81804	4.98478	5.29243	5.57827	5.58049	5.57019	2469.07	2311.26	2463.13	2291.23	2233.81	2620.57	2427.7	2137.41	2259.75	2364.9	2389.4	2288.27	2447.27	2096.77	2226.18	2346.42	2347.35	2343.02
Q9Z0N1	Eif2s3x	Eukaryotic translation initiation factor 2 subunit 3, X-linked	27	5.15211	5.06346	6.26178	5.32695	5.12959	6.32535	5.42209	5.18862	7.21484	5.14086	4.88374	6.35534	5.36167	4.89047	6.35263	5.25151	4.68544	5.99356	2871.09	2821.69	3489.48	2968.52	2858.54	3524.9	3021.54	2891.44	4020.58	2864.82	2721.54	3541.61	2987.87	2725.29	3540.1	2926.49	2611.03	3340
Q91W90	Txndc5	Thioredoxin domain-containing protein 5	27	6.68655	4.6145	5.71402	6.36069	4.379	5.04287	6.42174	4.19226	4.52433	7.25004	4.656	5.22985	7.47299	4.73777	5.59662	7.35787	4.23507	5.52782	2273.25	1568.81	1942.61	2162.47	1488.74	1714.44	2183.22	1425.26	1538.15	2464.82	1582.92	1778.01	2540.62	1610.71	1902.7	2501.48	1439.81	1879.31
Q9QXS6	Dbn1	Drebrin	27	5.72103	4.57225	6.16387	6.05469	5.10007	5.96156	6.36964	5.49612	7.1436	6.17232	4.07111	5.98609	6.05695	4.47643	5.75776	5.65123	3.84591	5.39938	2503.07	2000.45	2696.82	2649.05	2231.39	2608.31	2786.85	2404.66	3125.47	2700.52	1781.19	2619.04	2650.04	1958.53	2519.14	2472.53	1682.66	2362.34
Q8VDC1	Fyco1	FYVE and coiled-coil domain-containing protein 1	27	6.28723	5.74748	4.98429	6.1869	5.6181	4.55775	5.73724	5.21067	4.09227	6.44303	6.01371	4.57214	6.61705	6.57857	3.97652	6.47186	6.08153	4.82366	2137.67	1954.15	1694.67	2103.56	1910.16	1549.64	1950.67	1771.64	1391.38	2190.64	2044.67	1554.54	2249.81	2236.73	1352.03	2200.44	2067.73	1640.05
Q9CZU6	Cs	Citrate synthase, mitochondrial	27	3.4836	6.77595	6.03244	3.16778	6.75636	7.19832	4.22953	6.63562	7.16394	3.65357	6.67571	6.68739	3.63977	5.12178	6.33915	3.68631	6.35092	6.40188	2607.92	5072.66	4516.05	2371.48	5058	5388.86	3166.34	4967.61	5363.12	2735.16	4997.62	5006.36	2724.83	3834.3	4745.66	2759.67	4754.48	4792.62
P30999	Ctnnd1	Catenin delta-1	27	7.73439	4.37873	3.63032	7.95506	4.42133	3.26432	7.7857	4.68126	2.72282	8.99738	4.93724	3.51547	8.93704	6.22504	3.53319	8.58298	5.27339	3.42437	4099.83	2321.07	1924.35	4216.8	2343.65	1730.34	4127.02	2481.43	1443.31	4769.31	2617.12	1863.47	4737.33	3299.76	1872.86	4549.65	2795.3	1815.18
Q3U7R1	Esyt1	Extended synaptotagmin-1	27	4.87595	8.71314	3.64753	4.47069	8.02419	3.82352	4.26837	7.00058	3.30145	5.34367	9.10235	4.38346	5.18055	6.76451	4.54242	4.85676	7.40695	4.29391	1875.43	3351.33	1402.95	1719.55	3086.34	1470.64	1641.74	2692.63	1269.83	2055.33	3501.03	1686.01	1992.59	2601.82	1747.14	1868.05	2848.92	1651.56
P70696	H2bc1	Histone H2B type 1-A	27	5.93165	6.26942	5.43777	5.94611	8.45727	5.71033	5.47227	8.64372	5.25198	4.8573	5.35106	3.89645	5.17052	5.52532	3.40712	5.16924	5.12392	4.37855	4825.11	5099.86	4423.36	4836.86	6879.58	4645.07	4451.42	7031.24	4272.23	3951.17	4352.82	3169.57	4205.96	4494.58	2771.52	4204.92	4168.06	3561.74
P51150	Rab7a	Ras-related protein Rab-7a	27	4.78875	4.14844	7.35014	4.76235	4.26719	7.05367	5.74112	4.66416	10.7423	4.57838	3.71884	6.84014	4.70839	4.16777	7.54209	4.56613	3.70293	6.6572	2691.85	2331.92	4131.66	2677.01	2398.67	3965.01	3227.2	2621.81	6038.48	2573.6	2090.43	3844.97	2646.68	2342.78	4239.56	2566.71	2081.49	3742.14
Q9R1T2	Sae1	SUMO-activating enzyme subunit 1	27	5.99665	5.47738	5.97689	6.05721	5.29965	5.90904	5.96718	5.15286	5.55007	5.67168	5.14904	4.97949	5.9369	5.60371	4.65089	5.89275	5.33528	5.39333	4008.23	3661.14	3995.02	4048.71	3542.35	3949.66	3988.53	3444.23	3709.73	3791.02	3441.68	3328.34	3968.29	3745.58	3108.7	3938.78	3566.16	3604.96
Q9D2R0	Aacs	Acetoacetyl-CoA synthetase	27	5.31156	9.14192	4.2531	4.36919	8.48659	4.21037	4.80031	7.19186	4.00199	5.24139	8.66857	4.2359	4.76019	5.13635	4.43214	4.93251	6.81746	4.00859	2804.88	4827.58	2245.94	2307.24	4481.52	2223.37	2534.9	3797.81	2113.33	2767.82	4577.61	2236.85	2513.71	2712.35	2340.48	2604.71	3600.1	2116.82
A2AWA9	Rabgap1	Rab GTPase-activating protein 1	27	6.33356	5.51945	5.2302	6.29832	5.06549	5.20252	5.56886	4.62552	4.09435	6.75574	5.01361	5.50353	6.55316	5.87073	4.91877	6.86682	5.28345	5.29593	2470.68	2153.1	2040.26	2456.93	1976.01	2029.47	2172.37	1804.38	1597.18	2635.36	1955.77	2146.89	2556.34	2290.13	1918.78	2678.7	2061.04	2065.9
Q9DBF1	Aldh7a1	Alpha-aminoadipic semialdehyde dehydrogenase	27	3.22164	2.98301	9.22445	2.95766	3.29295	14.3445	4.55499	4.10644	15.5339	3.03037	2.59435	7.63875	2.74464	2.85729	6.94462	3.1951	2.71053	8.0648	2127.59	1970	6091.87	1953.25	2174.68	9473.16	3008.14	2711.91	10258.7	2001.27	1713.32	5044.67	1812.58	1886.97	4586.27	2110.06	1790.05	5326.04
Q80WJ7	Mtdh	Protein LYRIC	27	5.69436	5.59865	5.90818	5.29685	5.43146	5.69802	5.10205	5.04649	5.50542	5.4197	5.63682	6.09433	5.38178	5.39445	6.07665	5.469	5.28711	5.95868	2205.01	2167.95	2287.81	2051.08	2103.21	2206.43	1975.66	1954.14	2131.85	2098.66	2182.73	2359.89	2083.97	2088.88	2353.05	2117.74	2047.32	2307.36
Q8VHE0	Sec63	Translocation protein SEC63 homolog	27	5.03328	3.73936	7.56808	5.01028	3.75536	7.16143	4.75157	3.19483	6.5518	5.25451	3.84846	8.10863	6.00439	4.11974	8.46118	5.5558	3.90926	7.97206	1905.14	1415.38	2864.58	1896.43	1421.44	2710.66	1798.51	1209.27	2479.91	1988.88	1456.67	3069.19	2272.71	1559.36	3202.63	2102.92	1479.69	3017.49
Q9JMH6	Txnrd1	Thioredoxin reductase 1, cytoplasmic	27	2.37722	2.36904	10.1919	2.47532	2.4908	11.261	2.91806	2.77185	14.096	2.59635	2.36824	11.3527	2.94612	2.58946	12.2441	2.45057	2.20394	10.2973	1007.52	1004.05	4319.55	1049.09	1055.65	4772.62	1236.73	1174.77	5974.18	1100.38	1003.71	4811.49	1248.63	1097.47	5189.31	1038.6	934.074	4364.2
Q8K0C9	Gmds	GDP-mannose 4,6 dehydratase	27	6.40553	5.0315	5.47378	5.9154	5.19492	6.31279	7.17153	5.98931	6.57775	5.86108	4.68476	4.81727	5.3479	4.31073	4.76546	6.12893	4.83097	5.1804	3285.85	2581.02	2807.89	3034.43	2664.85	3238.28	3678.79	3072.35	3374.2	3006.57	2403.15	2471.12	2743.32	2211.28	2444.54	3143.97	2478.15	2657.4
Q922Q1	Mtarc2	Mitochondrial amidoxime reducing component 2	27	4.57077	7.7195	4.94286	4.1624	7.2642	5.66376	5.41383	8.11161	5.57477	4.41124	6.84522	5.07666	4.61792	5.4784	4.9375	4.42593	6.09265	4.69078	1528.06	2580.73	1652.46	1391.54	2428.51	1893.47	1809.91	2711.81	1863.71	1474.73	2288.44	1697.19	1543.83	1831.5	1650.67	1479.64	2036.85	1568.19
Q64449	Mrc2	C-type mannose receptor 2	27	6.60079	3.58253	4.47149	6.07059	3.64413	4.70965	5.95052	3.43203	4.15448	9.17715	3.99856	6.09356	9.46017	4.28184	6.70568	8.12685	3.93665	5.60332	2296.79	1246.57	1555.89	2112.31	1268	1638.75	2070.52	1194.2	1445.58	3193.25	1391.33	2120.3	3291.73	1489.9	2333.29	2827.8	1369.79	1949.71
Q9DC61	Pmpca	Mitochondrial-processing peptidase subunit alpha	27	3.7573	5.19625	7.45687	3.54843	4.7215	8.02078	3.32277	4.16307	6.81066	3.95293	5.3463	8.84136	3.9986	4.9951	8.18188	4.02815	5.19662	8.46144	1641.56	2270.24	3257.9	1550.31	2062.82	3504.28	1451.72	1818.85	2975.58	1727.03	2335.79	3862.79	1746.98	2182.35	3574.66	1759.9	2270.4	3696.8
Q3B7Z2	Osbp	Oxysterol-binding protein 1	27	6.14593	5.04672	5.35697	6.05763	5.03039	5.80868	6.11087	5.15045	5.30698	5.85826	5.39777	5.62212	5.81653	5.4724	4.99037	6.0504	5.06671	5.71082	2890.05	2373.16	2519.05	2848.53	2365.48	2731.46	2873.56	2421.94	2495.55	2754.78	2538.24	2643.73	2735.15	2573.33	2346.66	2845.13	2382.56	2685.45
Q8QZY1	Eif3l	Eukaryotic translation initiation factor 3 subunit L	27	5.64484	5.46015	4.87115	5.74568	5.72543	5.34656	6.25446	5.83372	5.08989	5.83186	5.91304	5.12243	5.93751	5.71053	5.09747	5.90169	5.52812	4.98549	2890.26	2795.7	2494.12	2941.89	2931.52	2737.54	3202.4	2986.97	2606.12	2986.02	3027.59	2622.78	3040.11	2923.89	2610	3021.77	2830.5	2552.66
Q99LF4	Rtcb	RNA-splicing ligase RtcB homolog	27	5.49084	5.83646	5.80025	5.4078	5.94381	5.658	5.17959	5.41547	5.75274	5.30978	5.473	5.62582	5.37983	5.75659	5.61889	5.3134	5.54254	5.4952	3970.46	4220.37	4194.19	3910.41	4298	4091.33	3745.39	3915.96	4159.84	3839.53	3957.56	4068.06	3890.18	4162.62	4063.05	3842.15	4007.84	3973.61
Q91VR2	Atp5f1c	ATP synthase subunit gamma, mitochondrial	27	4.19927	6.19539	6.69078	4.07146	6.66894	6.65368	3.71475	5.84213	6.30072	3.86174	6.05822	6.84427	4.09537	5.26277	6.56385	4.08824	6.01078	6.87764	1209.03	1783.73	1926.36	1172.23	1920.08	1915.68	1069.52	1682.03	1814.06	1111.84	1744.24	1970.55	1179.11	1515.22	1889.82	1177.06	1730.58	1980.16
Q9D172	Gatd3	Glutamine amidotransferase-like class 1 domain-containing protein 3, mitochondrial	27	5.10482	7.13927	5.66366	4.97457	6.84968	5.68566	4.90337	6.51026	5.93908	4.68932	5.78448	5.71206	4.14646	5.31543	5.0774	4.94919	5.59217	5.9631	3104.7	4342.03	3444.58	3025.48	4165.91	3457.96	2982.18	3959.48	3612.09	2852	3518.06	3474.02	2521.84	3232.79	3088.02	3010.05	3401.1	3626.7
Q80U95	Ube3c	Ubiquitin-protein ligase E3C	27	5.40669	5.35574	6.18517	5.66271	5.57647	6.11169	5.64003	5.44631	5.99935	4.98912	5.2326	5.94212	5.15088	5.1392	5.97839	5.16404	5.35771	5.66179	1514.12	1499.85	1732.13	1585.82	1561.67	1711.56	1579.47	1525.22	1680.1	1397.18	1465.37	1664.07	1442.48	1439.21	1674.22	1446.17	1500.41	1585.56
Q9CZW5	Tomm70	Mitochondrial import receptor subunit TOM70	26	3.82958	5.07124	8.00003	3.8823	4.82264	7.95403	3.57818	4.54374	7.34161	4.03012	5.17218	8.20557	4.03413	4.7611	8.28043	3.9803	4.98242	7.5304	2192.41	2903.26	4579.98	2222.6	2760.94	4553.65	2048.49	2601.27	4203.03	2307.22	2961.05	4697.65	2309.52	2725.71	4740.5	2278.7	2852.41	4311.12
Q62009	Postn	Periostin	26	7.04143	7.29622	1.96021	5.61576	6.63042	2.48862	4.63714	6.36855	1.33778	9.16383	9.65422	2.26442	6.36656	8.88166	2.49691	6.22712	8.73871	2.83045	2390.12	2476.61	665.366	1906.19	2250.61	844.729	1574.01	2161.72	454.091	3110.54	3276.99	768.625	2161.04	3014.76	847.541	2113.71	2966.24	960.76
A6H5Y3	Mtr	Methionine synthase	26	4.3952	4.05291	9.59383	4.53537	4.18597	8.67454	4.58536	4.36938	9.3546	4.06416	3.76953	7.64551	4.22531	3.93053	7.07643	4.011	3.85449	7.67587	1568.41	1446.26	3423.52	1618.43	1493.75	3095.47	1636.27	1559.2	3338.15	1450.28	1345.14	2728.27	1507.78	1402.59	2525.2	1431.31	1375.46	2739.1
Q6PGC1	Dhx29	ATP-dependent RNA helicase DHX29	26	5.60075	6.10567	5.04326	5.88469	6.03963	4.73266	5.23366	5.90231	4.25651	5.46583	6.23824	5.13582	5.33679	6.68997	5.344	5.52554	6.19124	5.27342	2672.95	2913.92	2406.89	2808.46	2882.41	2258.66	2497.76	2816.87	2031.42	2608.56	2977.19	2451.06	2546.98	3192.78	2550.42	2637.06	2954.76	2516.73
Q8BJD1	Itih5	Inter-alpha-trypsin inhibitor heavy chain H5	26	0.381328	0.439514	18.7077	0.341072	0.236351	15.7872	0.476266	0.215398	15.5885	0.486661	0.440981	15.7262	0.543794	0.30586	13.4655	0.467192	0.528584	15.862	188.916	217.742	9268.11	168.973	117.092	7821.21	235.95	106.712	7722.77	241.1	218.469	7791.01	269.405	151.528	6671.01	231.455	261.869	7858.31
Q6ZWR6	Syne1	Nesprin-1	26	7.41535	5.31751	3.26592	8.01082	5.11493	3.19932	7.81151	4.8905	2.51014	7.94583	6.15545	4.20531	7.40126	5.56126	4.02804	7.39684	5.86896	3.90105	1732.94	1242.68	763.234	1872.1	1195.34	747.669	1825.52	1142.89	586.61	1856.91	1438.51	982.764	1729.65	1299.65	941.339	1728.61	1371.55	911.661
O08553	Dpysl2	Dihydropyrimidinase-related protein 2	26	7.11463	5.49471	4.96063	6.89912	5.83748	4.77847	6.54174	5.63106	4.84708	6.61639	5.05939	4.06757	6.20285	5.71401	4.42577	6.22876	5.02746	4.5529	2597.68	2006.22	1811.22	2519	2131.37	1744.71	2388.51	2056	1769.76	2415.77	1847.28	1485.14	2264.78	2086.29	1615.93	2274.24	1835.62	1662.35
Q6ZPJ3	Ube2o	(E3-independent) E2 ubiquitin-conjugating enzyme UBE2O	26	5.32613	5.00013	5.68966	5.37076	4.69418	5.66136	4.91039	4.62365	5.38358	5.91442	5.16505	6.44734	6.09331	5.9335	6.00272	5.88309	5.19383	6.70688	2291.62	2151.35	2448.03	2310.82	2019.72	2435.85	2112.74	1989.37	2316.33	2544.73	2222.31	2774.03	2621.7	2552.94	2582.73	2531.25	2234.69	2885.7
Q6P9Q4	Fhod1	FH1/FH2 domain-containing protein 1	26	6.83354	7.24562	3.58986	6.61207	7.00812	3.62301	6.50676	7.05166	3.23493	5.92855	6.5127	3.82923	5.80017	6.50399	3.58557	6.28876	6.20431	3.64116	1932.8	2049.35	1015.36	1870.16	1982.18	1024.73	1840.37	1994.49	914.968	1676.83	1842.05	1083.06	1640.52	1839.59	1014.14	1778.71	1754.83	1029.87
P99024	Tubb5	Tubulin beta-5 chain	26	5.60887	4.80994	6.76759	5.95216	4.79745	6.01288	5.48095	4.79524	6.42467	6.1232	5.14093	5.89837	5.66193	4.9702	5.73967	5.41011	5.02364	5.38221	1433.86	1229.62	1730.08	1521.62	1226.43	1537.14	1401.16	1225.86	1642.41	1565.34	1314.24	1507.87	1447.43	1270.59	1467.3	1383.05	1284.25	1375.92
Q8BX02	Kank2	KN motif and ankyrin repeat domain-containing protein 2	26	8.11655	5.87862	2.2804	8.18207	5.67108	2.22918	7.55273	5.6475	1.613	8.10273	6.00056	2.64521	8.61623	7.27044	2.97313	8.35461	6.10294	2.76303	2707.18	1960.75	760.602	2729.04	1891.52	743.518	2519.13	1883.66	537.999	2702.58	2001.42	882.279	2873.85	2424.97	991.654	2786.59	2035.57	921.577
O08795	Prkcsh	Glucosidase 2 subunit beta	26	5.32067	4.00155	7.14215	4.92896	3.85699	6.84725	4.58974	3.17756	6.15003	5.61884	4.00066	7.77859	6.04215	4.1551	9.15272	5.74104	3.69246	7.80355	3034.78	2282.38	4073.7	2811.35	2199.93	3905.5	2617.87	1812.4	3507.82	3204.84	2281.88	4436.71	3446.29	2369.96	5220.48	3274.54	2106.09	4450.95
A2AAY5	Sh3pxd2b	SH3 and PX domain-containing protein 2B	26	4.01836	3.96221	10.1814	3.98895	3.81335	10.2616	3.72	3.4406	10.2362	4.22915	3.87202	7.28538	4.44741	4.47978	6.09062	4.03185	3.88445	8.05655	2563.27	2527.45	6494.63	2544.51	2432.5	6545.77	2372.95	2194.72	6529.59	2697.73	2469.92	4647.26	2836.95	2857.6	3885.14	2571.87	2477.85	5139.18
P97315	Csrp1	Cysteine and glycine-rich protein 1	26	4.89021	5.39556	5.44066	4.30872	5.27677	6.46645	5.58937	6.66878	5.81942	4.89118	5.77986	5.92434	4.5439	7.06163	6.44334	4.47717	5.58485	5.43779	2831.41	3124	3150.11	2494.73	3055.22	3744.04	3236.22	3861.19	3369.41	2831.97	3346.51	3430.16	2630.89	4088.65	3730.66	2592.26	3233.6	3148.45
P13439	Umps	Uridine 5'-monophosphate synthase	26	4.27931	4.28383	8.3943	4.32634	4.03696	8.22714	4.41894	3.93117	8.08761	4.57458	4.25793	7.55044	4.83309	4.31865	7.44921	4.59697	4.87589	7.55762	1431.21	1432.73	2807.47	1446.94	1350.16	2751.56	1477.91	1314.78	2704.9	1529.97	1424.06	2525.24	1616.43	1444.37	2491.39	1537.45	1630.74	2527.65
P46471	Psmc2	26S proteasome regulatory subunit 7	26	5.60358	5.83322	5.46694	5.58188	5.69171	5.83077	5.38772	5.59078	5.2816	5.55647	5.56123	5.59618	5.63801	5.52093	5.36963	5.52736	5.50813	5.45386	2138.59	2226.23	2086.44	2130.31	2172.22	2225.3	2056.21	2133.7	2015.71	2120.61	2122.43	2135.77	2151.73	2107.05	2049.3	2109.5	2102.16	2081.45
P62196	Psmc5	26S proteasome regulatory subunit 8	26	5.77359	5.91941	5.52376	5.85268	5.83283	5.59928	5.31838	5.30262	5.19257	5.58456	5.82693	5.42347	5.35041	5.55764	5.4726	5.56457	5.68767	5.21702	3263.36	3345.78	3122.15	3308.06	3296.85	3164.84	3006.06	2997.16	2934.95	3156.52	3293.51	3065.46	3024.17	3141.3	3093.24	3145.22	3214.8	2948.78
Q8C650	Septin10	Septin-10	26	7.49355	6.84534	3.00815	7.79758	7.28334	2.67894	8.33489	8.05847	2.76294	6.24523	6.24174	2.747	5.79514	6.36554	2.91761	6.46427	6.19852	2.76175	2616.8	2390.44	1050.47	2722.97	2543.4	935.504	2910.61	2814.08	964.839	2180.88	2179.66	959.273	2023.71	2222.89	1018.85	2257.37	2164.57	964.423
P62242	Rps8	40S ribosomal protein S8	26	4.95011	4.80827	4.8573	5.19486	5.1766	6.35776	7.05734	6.78478	6.63778	5.37673	5.28368	5.2476	5.71223	5.27718	5.35033	5.59437	5.36119	4.97188	1554.25	1509.72	1525.11	1631.1	1625.37	1996.23	2215.89	2130.31	2084.15	1688.21	1658.99	1647.66	1793.55	1656.95	1679.92	1756.54	1683.33	1561.09
Q62417	Sorbs1	Sorbin and SH3 domain-containing protein 1	26	4.80836	8.46093	2.51313	4.65456	8.36993	2.49849	4.70494	8.8837	2.35611	4.58027	8.44792	4.4894	4.60195	9.18363	5.56807	4.30612	7.90707	3.66543	1772.8	3119.47	926.568	1716.09	3085.92	921.17	1734.67	3275.34	868.676	1688.7	3114.67	1655.2	1696.69	3385.92	2052.89	1587.63	2915.26	1351.41
P0DOV2	Ifi204	Interferon-activable protein 204	26	6.30024	3.36027	5.67293	5.89364	2.64734	6.0602	5.26458	2.71795	5.95387	8.71419	4.21804	4.66176	10.6245	5.57163	4.16433	8.53583	4.48062	5.15811	1393.28	743.114	1254.55	1303.36	585.452	1340.2	1164.25	601.066	1316.68	1927.12	932.808	1030.93	2349.58	1232.15	920.93	1887.68	990.876	1140.7
A0A286YCX6	Trappc8	Trafficking protein particle complex 8	26	5.9741	5.76631	5.58213	6.22141	5.63607	5.23442	5.69022	5.4902	4.80424	5.73241	5.98413	5.09122	5.68275	5.74241	5.13273	5.58201	5.47488	5.17839	2572.6	2483.12	2403.8	2679.09	2427.03	2254.07	2450.35	2364.22	2068.82	2468.52	2576.92	2192.4	2447.13	2472.82	2210.28	2403.75	2357.62	2229.95
A2AAJ9	Obscn	Obscurin	26	1.19031	1.75206	1.61375	2.87804	3.60989	3.60592	1.87635	2.84689	2.44452	7.30215	12.324	8.63109	5.10021	13.0821	5.32513	6.83467	12.6868	6.89613	435.282	640.707	590.127	1052.46	1320.09	1318.64	686.156	1041.07	893.927	2670.3	4506.71	3156.28	1865.08	4783.96	1947.33	2499.35	4639.39	2521.82
Q8VDM6	Hnrnpul1	Heterogeneous nuclear ribonucleoprotein U-like protein 1	26	6.95455	6.62255	4.67557	6.76632	6.62632	4.28325	6.64906	6.51589	4.04441	6.07502	5.86057	3.6603	5.89642	6.02862	3.48266	6.10133	5.82639	3.93075	3906.63	3720.13	2626.44	3800.89	3722.25	2406.06	3735.02	3660.22	2271.89	3412.56	3292.1	2056.13	3312.24	3386.5	1956.34	3427.34	3272.9	2208.05
P98078	Dab2	Disabled homolog 2	26	6.33972	8.29539	4.6299	5.60151	8.20308	4.64279	5.98048	8.36971	5.47427	5.52823	6.95365	3.06005	4.33916	5.25904	2.40152	4.847	6.17597	3.89853	2590.81	3390.02	1892.07	2289.13	3352.29	1897.33	2444	3420.39	2237.13	2259.18	2841.7	1250.53	1773.25	2149.17	981.412	1980.79	2523.89	1593.18
Q569Z5	Ddx46	Probable ATP-dependent RNA helicase DDX46	26	6.35577	5.74073	5.05871	6.18421	4.98977	4.77969	5.61523	4.87175	3.74539	6.44123	5.69244	5.03987	6.73343	6.27673	4.9256	6.31056	5.83659	5.40231	1743.55	1574.82	1387.73	1696.48	1368.82	1311.19	1540.4	1336.44	1027.45	1766.99	1561.58	1382.56	1847.15	1721.86	1351.22	1731.14	1601.12	1481.99
Q99K48	Nono	Non-POU domain-containing octamer-binding protein	26	6.31843	6.07922	5.47916	6.01949	6.18243	5.31578	5.94735	5.85123	4.95522	5.67588	5.54705	4.60509	5.83469	5.65947	4.24788	5.77479	5.67417	4.83268	2302.21	2215.05	1996.41	2193.29	2252.66	1936.88	2167	2131.98	1805.51	2068.09	2021.15	1677.93	2125.95	2062.11	1547.78	2104.13	2067.47	1760.86
Q8K010	Oplah	5-oxoprolinase	26	9.3795	7.92488	1.80444	9.02335	7.75385	1.90978	9.0329	7.15617	1.3974	6.80152	6.48328	1.89398	6.02359	5.35251	2.02937	7.48578	6.28011	2.26758	2362.6	1996.2	454.52	2272.89	1953.11	481.053	2275.29	1802.57	351.99	1713.23	1633.07	477.073	1517.28	1348.24	511.178	1885.59	1581.89	571.179
Q80TL7	Mon2	Protein MON2 homolog	26	6.01126	5.43216	4.99531	5.92054	5.51964	5.03755	7.87589	7.063	5.93125	5.64549	5.31675	4.55708	5.6655	5.07695	4.62297	6.00196	5.06318	4.26352	1495.71	1351.62	1242.92	1473.14	1373.38	1253.43	1959.66	1757.4	1475.8	1404.7	1322.9	1133.88	1409.68	1263.24	1150.28	1493.4	1259.81	1060.84
Q8BU30	Iars1	Isoleucine--tRNA ligase, cytoplasmic	26	4.96456	4.20565	6.43246	5.01435	4.37628	6.65362	4.70529	4.31984	6.01119	5.40279	4.94062	7.2146	5.91245	5.20219	7.45238	5.43017	5.07947	6.68211	2881.88	2441.34	3733.98	2910.78	2540.39	3862.36	2731.38	2507.62	3489.44	3136.27	2867.98	4188.01	3432.12	3019.82	4326.03	3152.16	2948.59	3878.9
Q6DFW4	Nop58	Nucleolar protein 58	26	4.52932	4.66339	8.55784	6.22057	5.7146	5.94691	5.73627	6.18309	12.0212	3.67516	4.31331	5.43172	3.90241	4.01491	5.61234	3.71937	4.43309	5.32447	1770.56	1822.97	3345.35	2431.69	2233.9	2324.71	2242.37	2417.04	4699.23	1436.66	1686.12	2123.32	1525.5	1569.47	2193.93	1453.94	1732.95	2081.4
Q61510	Trim25	E3 ubiquitin/ISG15 ligase TRIM25	26	7.23275	5.66906	3.67172	6.33381	5.6441	3.6018	6.77488	5.53249	3.20369	7.23555	5.95878	3.65878	7.23418	6.69794	4.2406	7.04173	6.36225	3.9059	3290.78	2579.33	1670.57	2881.78	2567.97	1638.76	3082.46	2517.19	1457.63	3292.06	2711.15	1664.69	3291.43	3047.45	1929.41	3203.87	2894.72	1777.12
P27659	Rpl3	60S ribosomal protein L3	26	6.06663	5.57364	5.47386	6.77706	5.85036	4.98212	6.80975	7.03096	6.90565	5.16131	5.09335	4.38627	5.51222	5.02402	4.84707	5.11068	5.01037	4.38469	1997.48	1835.16	1802.31	2231.39	1926.27	1640.39	2242.15	2314.99	2273.73	1699.39	1677.02	1444.21	1814.94	1654.19	1595.93	1682.72	1649.7	1443.69
Q62351	Tfrc	Transferrin receptor protein 1	26	2.46476	10.3176	3.27959	2.42475	10.9783	2.98533	2.17136	10.5822	2.81836	2.09983	10.6009	5.87986	2.60601	8.03273	5.09948	2.74052	9.38122	5.53715	2257.9	9451.65	3004.35	2221.25	10057	2734.79	1989.13	9694.12	2581.83	1923.6	9711.25	5386.39	2387.3	7358.58	4671.5	2510.52	8593.9	5072.45
Q9CYR6	Pgm3	Phosphoacetylglucosamine mutase	26	5.80862	4.62263	5.65436	5.94692	4.83064	6.33367	6.85394	5.48021	6.22032	5.90392	4.13872	5.69783	5.90701	4.29829	5.76412	6.21522	4.3486	5.97499	3344.87	2661.92	3256.04	3424.51	2781.7	3647.22	3946.81	3155.76	3581.94	3399.75	2383.27	3281.07	3401.52	2475.15	3319.24	3579.01	2504.12	3440.67
A2AUC9	Klhl41	Kelch-like protein 41	26	1.1768	1.69091	1.98263	2.16857	3.00042	5.74626	1.93712	3.53618	3.54857	6.52862	9.46673	11.2881	5.05377	10.6994	6.66317	6.16675	10.0346	9.31137	501.27	720.26	844.521	923.727	1278.06	2447.68	825.137	1506.27	1511.55	2780.93	4032.45	4808.28	2152.71	4557.53	2838.25	2626.79	4274.35	3966.28
Q9EPU0	Upf1	Regulator of nonsense transcripts 1	26	5.79624	6.51239	5.07108	5.32917	6.68191	5.49978	6.3331	7.4278	5.91629	5.1896	5.72538	4.72239	4.96511	5.07548	4.77783	5.07331	5.44613	4.45701	3003.4	3374.48	2627.65	2761.38	3462.32	2849.79	3281.58	3848.81	3065.6	2689.06	2966.68	2446.97	2572.74	2629.93	2475.69	2628.8	2821.98	2309.46
Q91ZW3	Smarca5	SWI/SNF-related matrix-associated actin-dependent regulator of chromatin subfamily A member 5	26	5.65823	6.0852	5.8651	5.82819	6.007	5.49064	5.73743	6.0635	5.61388	5.42898	5.72229	4.79531	5.80465	5.55788	4.0805	5.40862	5.94921	4.9034	1518.64	1633.23	1574.16	1564.25	1612.24	1473.66	1539.89	1627.41	1506.73	1457.11	1535.83	1287.03	1557.93	1491.7	1095.18	1451.64	1596.73	1316.04
P14148	Rpl7	60S ribosomal protein L7	26	5.77265	5.73248	5.34999	6.29079	5.62887	4.56365	5.7925	5.66435	5.96668	5.58087	5.52673	5.14562	6.04622	5.76568	5.31502	5.56097	5.40906	4.88787	3673.24	3647.68	3404.3	4002.94	3581.75	2903.93	3685.87	3604.33	3796.71	3551.21	3516.76	3274.25	3847.32	3668.8	3382.04	3538.55	3441.88	3110.24
Q9DCD0	Pgd	6-phosphogluconate dehydrogenase, decarboxylating	26	5.00901	5.86229	6.7678	4.84902	5.5199	6.61669	4.82348	5.12792	6.19278	4.69773	4.96026	6.62096	4.722	4.87294	6.91979	4.90833	4.78408	6.74501	3213.63	3761.07	4342.02	3110.98	3541.41	4245.07	3094.6	3289.92	3973.1	3013.92	3182.35	4247.81	3029.49	3126.33	4439.53	3149.04	3069.32	4327.4
P54728	Rad23b	UV excision repair protein RAD23 homolog B	26	5.02613	4.47877	6.71626	5.64715	4.58934	6.06176	5.43138	4.77408	7.7225	5.53191	4.41263	6.49149	5.48903	5.03156	6.22318	5.68479	4.27694	6.41108	2863.36	2551.53	3826.22	3217.15	2614.52	3453.35	3094.22	2719.77	4399.46	3151.5	2513.85	3698.16	3127.07	2866.45	3545.31	3238.59	2436.55	3652.36
Q8CFI0	Nedd4l	E3 ubiquitin-protein ligase NEDD4-like	26	5.56761	5.19698	5.42308	6.87986	5.49197	4.67467	5.90202	5.94707	5.69698	4.92933	4.67374	5.92525	5.31995	5.18969	7.7533	5.07937	4.95217	5.39696	1520.46	1419.24	1480.99	1878.82	1499.8	1276.61	1611.78	1624.08	1555.79	1346.15	1276.35	1618.12	1452.82	1417.25	2117.35	1387.12	1352.39	1473.85
Q80YR5	Safb2	Scaffold attachment factor B2	26	5.31161	5.63399	6.49513	5.29369	5.78762	6.72132	5.23933	5.32339	6.23632	5.01844	5.39272	5.63861	5.19885	5.23217	5.38619	5.03948	5.20138	5.84976	2038.89	2162.64	2493.2	2032.01	2221.61	2580.02	2011.15	2043.42	2393.85	1926.36	2070.03	2164.42	1995.61	2008.4	2067.52	1934.43	1996.58	2245.46
Q91YE6	Ipo9	Importin-9	26	4.62012	6.65036	5.14959	4.38243	6.78782	5.656	4.94002	6.82337	5.02348	4.97208	7.16031	4.92876	5.32259	6.49545	4.75522	5.08468	6.32963	4.91808	1797.49	2587.37	2003.48	1705.01	2640.85	2200.5	1921.95	2654.68	1954.42	1934.42	2785.77	1917.57	2070.79	2527.1	1850.05	1978.23	2462.59	1913.41
Q6A028	Swap70	Switch-associated protein 70	26	10.1978	5.51179	1.62645	10.0135	5.06765	1.60952	10.2551	5.35098	0.913382	9.21304	4.92475	1.73943	8.80143	5.55107	1.97049	10.1034	5.16372	1.98646	4892.1	2644.12	780.241	4803.69	2431.05	772.118	4919.58	2566.97	438.167	4419.68	2362.5	834.441	4222.22	2662.96	945.284	4846.78	2477.14	952.944
O35286	Dhx15	Pre-mRNA-splicing factor ATP-dependent RNA helicase DHX15	26	5.04557	5.05914	6.95658	5.02883	5.12804	7.35722	5.33884	5.08621	6.79289	5.05122	4.73888	6.28569	5.11908	4.93743	5.90475	4.99407	4.84123	6.33433	2793.57	2801.08	3851.64	2784.3	2839.23	4073.46	2955.95	2816.07	3761	2796.7	2623.76	3480.18	2834.27	2733.7	3269.27	2765.06	2680.43	3507.12
P62965	Crabp1	Cellular retinoic acid-binding protein 1	26	0.532247	0.519047	16.0069	0.662503	0.229309	11.8794	0.466714	0.134192	14.6208	0.596361	0.601037	15.9591	0.733307	0.51445	18.5163	0.709409	0.631777	16.6872	224.132	218.574	6740.6	278.984	96.5635	5002.48	196.536	56.5089	6156.91	251.131	253.1	6720.46	308.8	216.638	7797.33	298.736	266.045	7027.07
Q8BMA6	Srp68	Signal recognition particle subunit SRP68	26	5.5453	4.77021	6.45459	5.35052	5.07065	6.36761	5.81056	5.71994	6.67544	5.13975	5.40874	5.67203	5.54272	4.7941	5.74393	5.31769	5.00853	5.60769	1055.29	907.793	1228.34	1018.23	964.967	1211.79	1105.78	1088.53	1270.37	978.118	1029.31	1079.41	1054.8	912.339	1093.09	1011.98	953.145	1067.17
Q921G7	Etfdh	Electron transfer flavoprotein-ubiquinone oxidoreductase, mitochondrial	26	4.5521	7.56788	5.79633	4.49183	7.24398	5.6318	4.39279	6.63427	5.57167	4.09011	6.55609	5.85143	3.95102	5.40214	5.31979	4.49555	6.32724	6.12399	3016.82	5015.47	3841.41	2976.87	4800.81	3732.37	2911.24	4396.73	3692.52	2710.64	4344.92	3877.92	2618.46	3580.17	3525.59	2979.34	4193.26	4058.56
Q9WVB4	Slit3	Slit homolog 3 protein	26	2.71133	4.14487	5.3761	2.51062	3.72957	4.78095	2.24496	3.37154	4.51007	4.83209	5.96495	8.67627	6.79044	11.3992	12.1923	3.71583	5.87477	7.17414	1434.17	2192.46	2843.72	1328.01	1972.78	2528.91	1187.48	1783.4	2385.63	2555.96	3155.2	4589.36	3591.84	6029.7	6449.17	1965.51	3107.5	3794.8
Q8BWW9	Pkn2	Serine/threonine-protein kinase N2	26	6.59216	4.95617	4.8728	6.95656	5.20318	4.97025	7.23364	5.19501	4.69716	6.66988	5.0143	4.71587	6.64351	5.36408	4.81068	6.63578	4.90004	4.56893	2071.82	1557.65	1531.45	2186.35	1635.28	1562.08	2273.43	1632.72	1476.25	2096.25	1575.92	1482.13	2087.96	1685.85	1511.93	2085.53	1540.01	1435.95
P47934	Crat	Carnitine O-acetyltransferase	26	3.99001	9.45951	4.08305	3.54945	8.95711	4.58656	4.08477	8.0404	4.28144	3.96708	8.5134	4.68546	4.00246	6.63318	4.36616	4.20961	7.92381	4.66654	2048.72	4857.1	2096.49	1822.51	4599.13	2355.02	2097.37	4128.44	2198.36	2036.94	4371.31	2405.81	2055.11	3405.88	2241.85	2161.47	4068.57	2396.09
Q8K4Q8	Colec12	Collectin-12	26	8.3909	6.61398	3.56744	8.25776	6.35053	3.4582	8.12111	6.64416	3.1433	7.08533	4.86545	3.28289	6.5534	5.23947	3.14009	6.68141	5.2231	3.3815	4440.33	3500.01	1887.83	4369.87	3360.6	1830.03	4297.56	3515.98	1663.38	3749.44	2574.72	1737.25	3467.95	2772.64	1661.69	3535.69	2763.98	1789.43
Q99LX0	Park7	Parkinson disease protein 7 homolog	26	5.34797	5.47854	6.3929	5.23183	5.64644	6.43374	5.38618	5.49893	7.65239	4.81267	4.69775	5.75039	4.67894	5.03567	5.62836	5.14984	4.84465	6.33282	3645.52	3734.53	4357.82	3566.35	3848.98	4385.66	3671.57	3748.43	5216.37	3280.63	3202.29	3919.84	3189.47	3432.64	3836.65	3510.47	3302.43	4316.86
Q5SUR0	Pfas	Phosphoribosylformylglycinamidine synthase	26	5.51794	5.0678	6.9929	5.86956	4.95447	7.03374	6.00274	4.97423	7.2795	5.36971	4.35851	5.81973	5.12767	4.33864	5.49046	5.30099	4.2513	6.2501	2428.93	2230.78	3078.19	2583.71	2180.89	3096.16	2642.33	2189.59	3204.34	2363.68	1918.56	2561.77	2257.14	1909.82	2416.83	2333.43	1871.37	2751.21
Q8VEM8	Slc25a3	Phosphate carrier protein, mitochondrial	26	4.09104	4.82334	7.54418	3.93976	5.14483	7.25659	4.03756	4.83497	7.98974	3.72976	5.10994	8.07491	3.7513	4.71127	8.08571	4.12028	4.85389	7.9009	2117.04	2495.99	3903.98	2038.75	2662.35	3755.15	2089.36	2502.01	4134.54	1930.08	2644.3	4178.62	1941.23	2438	4184.2	2132.17	2511.8	4088.57
Q8CGN5	Plin1	Perilipin-1	26	0.600501	19.5937	0.756651	0.0967071	18.9901	0.520349	0.255719	16.1364	0.820614	0.20989	18.5734	0.59585	0.256222	7.70757	0.646909	0.30645	13.4675	0.465476	243.425	7942.69	306.723	39.2021	7698	210.934	103.661	6541.22	332.652	85.0832	7529.07	241.539	103.864	3124.41	262.237	124.226	5459.32	188.69
P23492	Pnp	Purine nucleoside phosphorylase	26	6.9989	5.93638	5.44451	6.66914	6.5896	5.03913	7.57421	6.94684	5.32886	5.0473	5.53102	3.81748	4.85435	4.85912	3.945	5.49935	5.13155	4.78725	1696.44	1438.9	1319.68	1616.52	1597.24	1221.42	1835.89	1683.83	1291.65	1223.4	1340.65	925.309	1176.63	1177.79	956.218	1332.97	1243.82	1160.37
Q80TH2	Erbin	Erbin	26	6.32141	4.52825	6.7516	6.6747	4.61265	6.2855	6.1189	4.26873	5.94872	5.84539	4.20236	5.82055	5.72624	4.7898	5.2152	6.14413	4.38973	6.35614	2031.11	1454.95	2169.33	2144.62	1482.07	2019.57	1966.04	1371.57	1911.36	1878.16	1350.24	1870.17	1839.87	1538.99	1675.67	1974.14	1410.44	2042.27
Q91WD5	Ndufs2	NADH dehydrogenase [ubiquinone] iron-sulfur protein 2, mitochondrial	26	4.04919	5.87541	7.744	4.30181	6.00425	6.57964	4.24785	5.91218	8.40811	3.70182	5.72235	6.87008	3.6003	4.83614	6.91249	3.69465	5.24794	6.2918	2216.92	3216.76	4239.81	2355.22	3287.31	3602.33	2325.68	3236.9	4603.41	2026.73	3132.97	3761.34	1971.15	2647.77	3784.56	2022.8	2873.23	3444.74
Q8BGJ5	Ptbp1	Isoform of P17225, Polypyrimidine tract-binding protein 1	26	6.59734	5.75021	5.65148	6.48916	5.76399	5.14125	7.10976	6.1398	5.44542	5.78493	5.32141	4.30333	6.07084	4.93623	4.23324	5.87563	5.00318	4.38278	1753.6	1528.43	1502.19	1724.85	1532.1	1366.57	1889.81	1631.99	1447.42	1537.66	1414.46	1143.85	1613.66	1312.07	1125.22	1561.77	1329.87	1164.96
P61979-2	Hnrnpk	Isoform of P61979, Isoform 2 of Heterogeneous nuclear ribonucleoprotein K	26	6.70211	5.91848	4.65232	6.61423	6.08484	4.5187	6.43198	5.76397	4.20421	6.23335	5.64653	4.17547	6.63211	5.72406	3.98652	6.52908	5.76152	4.42055	4489.57	3964.64	3116.48	4430.71	4076.08	3026.96	4308.62	3861.14	2816.29	4175.56	3782.47	2797.04	4442.69	3834.41	2670.47	4373.67	3859.5	2961.21
P84091	Ap2m1	AP-2 complex subunit mu	26	6.55495	5.14832	5.03653	6.60835	5.5978	5.66367	7.27236	6.1116	5.36779	6.2157	4.68746	4.5116	6.08396	4.75467	4.5285	6.26922	4.74266	4.84487	3655.66	2871.2	2808.85	3685.44	3121.87	3158.6	4055.76	3408.41	2993.59	3466.46	2614.18	2516.1	3392.99	2651.66	2525.52	3496.31	2644.96	2701.96
O88492	Plin4	Perilipin-4	26	3.35766	17.4777	0.82694	2.72576	16.388	0.318616	2.49326	14.3255	0.505592	1.49203	12.9275	0.81772	1.37491	9.77269	0.866455	1.82918	11.7159	0.784608	1517.83	7900.77	373.818	1232.18	7408.21	144.03	1127.08	6475.83	228.553	674.471	5843.89	369.65	621.526	4417.75	391.681	826.881	5296.16	354.682
Q5XJF6	Rpl10a	Isoform of P53026, Ribosomal protein	26	6.09088	5.845	5.15249	5.73461	5.63556	5.00388	5.32735	5.25709	4.34226	6.07404	5.99768	5.27501	6.35738	6.14775	5.46945	5.94043	5.44473	4.90438	5779.34	5546.03	4888.95	5441.29	5347.31	4747.94	5054.86	4988.2	4120.16	5763.36	5690.9	5005.2	6032.21	5833.3	5189.69	5636.59	5166.24	4653.52
Q99KQ4	Nampt	Nicotinamide phosphoribosyltransferase	26	5.91535	8.52758	4.09535	4.71028	7.49306	4.32212	4.80958	6.07237	3.47574	5.73042	7.79355	4.04857	5.73511	5.89534	4.18732	5.94083	6.76886	4.47855	2482.7	3579.06	1718.84	1976.92	3144.87	1814.01	2018.6	2548.6	1458.78	2405.08	3270.99	1699.2	2407.05	2474.3	1757.44	2493.39	2840.92	1879.67
P49312	Hnrnpa1	Heterogeneous nuclear ribonucleoprotein A1	26	5.22171	4.98627	6.63272	5.34734	5.23379	7.38919	6.52777	5.94116	8.02497	5.02612	4.51795	5.59559	5.11046	4.42148	4.87923	5.03478	4.32754	5.78192	1048.59	1001.31	1331.93	1073.81	1051.01	1483.84	1310.86	1193.06	1611.52	1009.31	907.261	1123.67	1026.24	887.89	979.811	1011.05	869.026	1161.08
P26638	Sars1	Serine--tRNA ligase, cytoplasmic	26	5.19542	4.65754	6.78658	4.92279	4.65882	7.24745	5.33652	4.95294	6.90552	5.34318	4.61532	6.56672	5.52857	4.65871	6.72159	5.14589	4.34851	6.40795	2265.14	2030.63	2958.87	2146.28	2031.19	3159.8	2326.66	2159.42	3010.73	2329.56	2012.22	2863.01	2410.39	2031.14	2930.53	2243.55	1895.9	2793.79
Q02788	Col6a2	Collagen alpha-2(VI) chain	26	2.90842	12.3653	2.41101	2.06677	12.3282	1.72871	2.19091	9.7528	1.8361	2.65956	14.1527	1.69421	2.60789	10.9661	2.45029	2.54833	13.7365	1.59607	1011.03	4298.46	838.119	718.455	4285.55	600.938	761.608	3390.29	638.268	924.522	4919.8	588.946	906.559	3812.06	851.774	885.854	4775.12	554.829
Q8K310	Matr3	Matrin-3	26	5.76236	5.82999	4.0042	6.11047	5.81273	4.75832	7.0507	7.15929	5.05698	5.9701	6.19265	4.19552	5.98222	5.91868	3.82073	5.84539	6.37221	4.15746	2327.19	2354.5	1617.14	2467.78	2347.53	1921.7	2847.5	2891.35	2042.31	2411.09	2500.96	1694.41	2415.98	2390.32	1543.04	2360.72	2573.48	1679.03
E9Q912	Rap1gds1	Rap1 GTPase-GDP dissociation stimulator 1	26	5.58806	5.18051	6.06555	5.68855	5.23792	6.22805	5.69342	5.28597	5.99622	5.77795	5.01489	5.64703	5.72589	4.94056	5.51055	5.65994	4.87121	5.8877	2500.26	2317.91	2713.9	2545.22	2343.6	2786.61	2547.4	2365.09	2682.88	2585.22	2243.81	2526.64	2561.93	2210.55	2465.58	2532.42	2179.52	2634.32
P32067	Ssb	Lupus La protein homolog	26	5.59659	5.46543	6.31555	5.38365	5.53575	6.13779	5.22405	5.12288	5.6303	5.40811	5.19029	5.7804	5.82581	5.26325	5.7635	5.42755	5.07956	5.84953	4149.52	4052.27	4682.58	3991.64	4104.41	4550.78	3873.3	3798.29	4174.51	4009.77	3848.27	4285.8	4319.47	3902.36	4273.27	4024.19	3766.17	4337.06
P62821	Rab1A	Ras-related protein Rab-1A	26	6.21492	5.45645	5.86603	6.07165	5.43853	5.18665	5.71065	4.98185	4.89016	5.95553	5.03525	5.53286	6.07955	4.95691	6.08847	5.90974	5.20076	5.42404	3625.85	3183.35	3422.3	3542.26	3172.89	3025.94	3331.65	2906.46	2852.96	3474.51	2937.61	3227.92	3546.86	2891.91	3552.07	3447.8	3034.17	3164.44
Q921M4	Golga2	Golgin subfamily A member 2	25	6.39944	5.37428	4.89812	6.67785	5.43441	4.56091	6.36322	5.20257	4.31544	6.60288	5.29676	4.94487	6.85311	5.57766	4.80381	6.55555	5.34556	4.79356	1504.24	1263.27	1151.34	1569.68	1277.4	1072.08	1495.72	1222.9	1014.38	1552.06	1245.04	1162.33	1610.88	1311.07	1129.17	1540.93	1256.52	1126.76
Q4LDD4	Arap1	Arf-GAP with Rho-GAP domain, ANK repeat and PH domain-containing protein 1	25	8.00159	7.78847	2.30967	7.55987	7.36877	2.14796	7.03693	8.11115	1.74173	7.65028	6.48338	2.31889	6.85099	6.78083	2.91497	6.42721	6.20245	2.30488	2418.33	2353.92	698.053	2284.82	2227.07	649.18	2126.78	2451.44	526.403	2312.15	1959.48	700.839	2070.58	2049.38	880.995	1942.5	1874.57	696.605
O08759	Ube3a	Ubiquitin-protein ligase E3A	25	5.36217	5.26957	5.31531	5.41698	5.22382	5.78536	6.10459	5.85154	6.08328	5.79564	5.49683	5.60994	5.65949	5.21006	5.47368	5.80386	5.294	5.24387	2193.46	2155.58	2174.29	2215.88	2136.87	2366.57	2497.16	2393.64	2488.44	2370.78	2248.55	2294.82	2315.08	2131.24	2239.07	2374.14	2165.58	2145.07
Q91YR7	Prpf6	Pre-mRNA-processing factor 6	25	5.88534	5.98076	5.72676	6.08247	5.98143	5.49273	5.8819	6.09728	5.5312	5.37022	5.63533	4.7834	5.35089	5.75147	4.51635	5.41061	5.76226	4.7596	3076.75	3126.63	2993.84	3179.8	3126.98	2871.5	3074.95	3187.55	2891.61	2807.45	2946.05	2500.68	2797.35	3006.76	2361.07	2828.57	3012.4	2488.23
Q99NH0	Ankrd17	Ankyrin repeat domain-containing protein 17	25	6.12154	6.03716	4.82398	5.71542	5.71697	4.54212	5.50245	5.63773	3.98059	6.24538	5.90748	4.82177	6.89584	6.41226	4.61141	6.20771	5.89666	4.92353	2023.42	1995.53	1594.52	1889.18	1889.69	1501.36	1818.78	1863.5	1315.75	2064.35	1952.66	1593.79	2279.36	2119.51	1524.26	2051.9	1949.09	1627.43
P61982	Ywhag	14-3-3 protein gamma	25	4.92038	6.28048	5.94661	4.77272	6.36736	5.82371	4.79063	5.79823	5.66234	5.06807	5.88702	5.70927	5.2489	5.30505	5.87594	5.15732	5.49265	5.89333	3077.18	3927.78	3718.98	2984.83	3982.11	3642.12	2996.04	3626.18	3541.2	3169.55	3681.71	3570.55	3282.64	3317.75	3674.78	3225.36	3435.07	3685.66
Q9D0F3	Lman1	Protein ERGIC-53	25	5.79273	4.49124	5.64754	6.04991	4.55594	5.44688	5.4884	4.40165	4.53185	6.39093	4.70407	6.24193	6.87729	5.18751	6.45511	6.64491	4.67701	6.41508	3110.29	2411.48	3032.34	3248.38	2446.22	2924.6	2946.89	2363.38	2433.29	3431.48	2525.76	3351.48	3692.63	2785.33	3465.94	3567.86	2511.23	3444.45
Q9JIK5	Ddx21	Nucleolar RNA helicase 2	25	3.9081	5.22277	7.3803	4.34159	5.49516	7.26318	4.27749	5.43516	7.45041	3.8211	5.85183	6.76139	4.49863	5.48829	6.7096	3.71674	6.21421	6.16406	1603.93	2143.49	3028.96	1781.84	2255.27	2980.89	1755.53	2230.65	3057.73	1568.22	2401.66	2774.95	1846.29	2252.46	2753.7	1525.39	2550.38	2529.8
Q8BWT1	Acaa2	3-ketoacyl-CoA thiolase, mitochondrial	25	3.79827	6.88252	6.49007	3.3226	7.16264	6.2706	3.40347	6.48696	6.42632	3.49446	6.51985	6.64048	3.35488	6.62695	6.6521	3.51245	6.42633	6.52905	2874.25	5208.18	4911.21	2514.3	5420.16	4745.13	2575.49	4908.85	4862.97	2644.35	4933.74	5025.02	2538.72	5014.79	5033.82	2657.97	4862.97	4940.7
Q99LC5	Etfa	Electron transfer flavoprotein subunit alpha, mitochondrial	25	4.93011	7.3907	5.06067	4.68848	7.20353	5.78537	5.34691	7.33505	5.79218	4.66823	6.29765	4.9197	4.52311	5.31706	4.71726	4.81109	6.21523	4.99766	2541.27	3809.6	2608.57	2416.71	3713.12	2982.12	2756.11	3780.91	2985.63	2406.28	3246.18	2535.9	2331.48	2740.72	2431.55	2479.92	3203.69	2576.09
P21550	Eno3	Beta-enolase	25	3.66613	2.56167	2.60122	4.34718	3.93798	4.29341	5.41891	3.97489	3.69629	8.18715	7.56743	6.08279	7.41488	9.59108	4.77079	8.06735	8.1612	5.65966	2545.74	1778.81	1806.27	3018.65	2734.5	2981.31	3762.85	2760.13	2566.68	5685.1	5254.77	4223.84	5148.84	6659.97	3312.8	5601.91	5667.08	3930.03
P62874	Gnb1	Guanine nucleotide-binding protein G(I)/G(S)/G(T) subunit beta-1	25	6.19224	5.53676	4.65228	6.07432	5.83562	4.68319	6.43466	6.28115	4.75648	6.32611	5.45768	4.66008	6.30729	5.75387	4.82702	6.10838	5.32781	4.78507	4050.33	3621.59	3043.04	3973.2	3817.07	3063.27	4208.9	4108.49	3111.21	4137.9	3569.86	3048.15	4125.58	3763.6	3157.35	3995.48	3484.91	3129.9
Q61792	Lasp1	LIM and SH3 domain protein 1	25	6.40867	4.94198	4.08005	6.10679	5.1921	3.97913	7.02804	5.46139	4.35224	7.19295	4.85756	4.71068	8.13768	6.0161	5.94453	6.68532	4.69638	4.20841	3756.07	2896.46	2391.29	3579.14	3043.05	2332.14	4119.08	3200.88	2550.82	4215.73	2846.98	2760.89	4769.43	3525.99	3484.04	3918.22	2752.52	2466.52
Q69Z38	Peak1	Inactive tyrosine-protein kinase PEAK1	25	7.02699	3.72858	4.65202	6.92827	3.47235	4.68673	6.51861	3.72215	4.6985	9.11537	4.23531	5.54102	8.34823	4.63203	5.61345	8.22013	3.99658	4.86369	3828.61	2031.49	2534.62	3774.82	1891.89	2553.53	3551.62	2027.99	2559.95	4966.45	2307.58	3018.99	4548.48	2523.73	3058.45	4478.68	2177.51	2649.95
E9QAT4-2	Sec16a	Isoform of E9QAT4, Isoform 2 of Protein transport protein Sec16A	25	6.25973	5.43759	5.2784	6.29679	5.21853	4.86485	5.75934	4.58798	4.37293	6.3593	5.20167	5.79222	6.62924	5.34771	5.80828	6.39548	4.92457	5.46539	1299.92	1129.19	1096.13	1307.61	1083.7	1010.25	1196	952.753	908.096	1320.59	1080.19	1202.83	1376.65	1110.52	1206.16	1328.1	1022.65	1134.96
Q922D4	Ppp6r3	Serine/threonine-protein phosphatase 6 regulatory subunit 3	25	6.12329	5.04392	5.52987	6.09038	4.81398	5.52962	5.97786	4.91718	4.9594	6.34706	4.91525	5.31655	6.57959	5.39983	5.20019	6.36667	5.01665	5.87271	2473.69	2037.65	2233.96	2460.4	1944.75	2233.86	2414.94	1986.44	2003.5	2564.09	1985.66	2147.78	2658.03	2181.43	2100.78	2572.01	2026.63	2372.46
P17879	Hspa1b	Heat shock 70 kDa protein 1B	25	6.61536	6.22682	2.99088	6.52617	6.14114	3.35745	8.61022	9.17177	3.69825	5.0986	6.49681	2.6416	5.35522	8.52395	2.94065	5.83629	6.72621	3.04263	2092.42	1969.53	946.008	2064.21	1942.43	1061.95	2723.39	2901.01	1169.75	1612.68	2054.93	835.532	1693.84	2696.11	930.12	1846	2127.48	962.376
O54998	Fkbp7	Peptidyl-prolyl cis-trans isomerase FKBP7	25	5.63055	5.52343	6.68002	6.2378	6.4388	4.54959	5.8056	6.15368	7.41373	5.32577	4.62554	4.87983	6.01255	4.87734	5.19255	5.07445	4.45174	5.12703	3235.06	3173.52	3838.04	3583.96	3699.45	2613.99	3335.64	3535.63	4259.6	3059.95	2657.63	2803.73	3454.54	2802.3	2983.41	2915.55	2557.77	2945.77
O35551	Rabep1	Rab GTPase-binding effector protein 1	25	6.16782	6.42248	4.82814	6.0061	6.509	4.81279	5.7783	6.44403	4.61492	6.23127	5.84315	4.29426	5.60592	6.01853	3.9573	6.12171	5.84518	4.4991	2179.84	2269.84	1706.37	2122.69	2300.42	1700.94	2042.18	2277.46	1631.01	2202.27	2065.1	1517.68	1981.25	2127.08	1398.59	2163.54	2065.81	1590.08
Q61335	Bcap31	B-cell receptor-associated protein 31	25	5.27807	7.68749	5.23974	4.79548	6.68021	5.02753	4.44063	5.65633	5.12096	5.17515	6.64604	5.41371	5.11261	5.54759	5.60305	5.31623	5.9153	5.34387	4741.87	6906.51	4707.43	4308.3	6001.56	4516.78	3989.5	5081.7	4600.71	4649.4	5970.86	4863.73	4593.21	4984	5033.83	4776.15	5314.36	4800.98
O54988	Slk	STE20-like serine/threonine-protein kinase	25	5.52171	5.04643	5.83118	5.83871	4.85565	5.35384	5.26503	4.60349	4.85714	5.47007	5.25975	6.65116	5.58081	6.16693	6.71186	5.39032	5.28136	6.31458	2333.95	2133.05	2464.76	2467.94	2052.42	2262.99	2225.45	1945.83	2053.04	2312.12	2223.22	2811.35	2358.93	2606.67	2837.01	2278.41	2232.36	2669.08
Q63844	Mapk3	Mitogen-activated protein kinase 3	25	8.52826	5.92399	3.3162	8.02882	5.77745	3.31959	8.46754	6.21333	2.98781	7.45222	5.04285	3.00522	7.11819	5.50299	3.1394	7.88497	4.9754	3.31578	3399.13	2361.14	1321.74	3200.07	2302.73	1323.09	3374.92	2476.46	1190.86	2970.25	2009.94	1197.8	2837.11	2193.34	1251.28	3142.73	1983.06	1321.58
Q6A4J8	Usp7	Ubiquitin carboxyl-terminal hydrolase 7	25	5.57119	6.06711	4.93527	5.6286	6.18129	5.58048	6.68802	7.57387	6.24406	5.18271	5.7549	4.33175	5.16286	5.72313	4.25367	5.0961	5.66956	4.35539	2773.85	3020.77	2457.23	2802.44	3077.62	2778.48	3329.92	3770.97	3108.87	2580.43	2865.32	2156.74	2570.55	2849.5	2117.87	2537.31	2822.83	2168.52
P50247	Ahcy	Adenosylhomocysteinase	25	5.78818	6.43074	5.827	5.66666	6.28229	5.91179	5.69162	6.41214	5.72292	5.16361	5.05643	5.02204	4.84462	5.13276	4.55268	5.30772	5.53767	5.64911	3794.09	4215.28	3819.53	3714.43	4117.97	3875.11	3730.79	4203.08	3751.31	3384.69	3314.43	3291.89	3175.59	3364.47	2984.23	3479.15	3629.88	3702.93
Q9DCX2	Atp5pd	ATP synthase subunit d, mitochondrial	25	3.82734	5.59373	6.10703	4.70989	6.39992	5.43618	4.66507	7.00299	10.4686	4.16559	6.21233	6.07222	3.78067	4.61323	5.9115	3.86814	5.20378	5.96176	1530.9	2237.44	2442.75	1883.91	2559.91	2174.42	1865.98	2801.13	4187.35	1666.19	2484.87	2428.83	1512.23	1845.25	2364.54	1547.22	2081.46	2384.65
E9PZQ0	Ryr1	Ryanodine receptor 1	25	1.83689	2.49895	2.06742	3.12466	4.44672	2.99035	2.03936	3.12732	1.97963	6.84335	14.095	5.83828	5.16977	13.9332	4.18033	6.70641	13.9163	5.20602	509.059	692.534	572.944	865.937	1232.32	828.715	565.168	866.674	548.617	1896.5	3906.16	1617.96	1432.7	3861.31	1158.49	1858.55	3856.63	1442.75
Q8CIB5	Fermt2	Fermitin family homolog 2	25	7.15377	5.63332	3.26149	7.38844	5.69737	3.35859	8.63812	6.7633	2.79384	7.16735	5.4809	3.70365	7.117	5.74298	4.1349	6.93813	5.57639	3.45046	4514.47	3554.97	2058.2	4662.55	3595.39	2119.48	5451.18	4268.06	1763.08	4523.04	3458.78	2337.23	4491.26	3624.17	2609.38	4378.39	3519.04	2177.45
Q9CR62	Slc25a11	Mitochondrial 2-oxoglutarate/malate carrier protein	25	5.24719	6.05139	5.8365	5.4602	6.81982	5.68771	4.96594	6.70136	5.61587	4.7469	5.87867	5.50272	4.51011	5.3557	4.96887	5.14153	5.62539	5.88415	2911.46	3357.68	3238.45	3029.65	3784.05	3155.89	2755.41	3718.33	3116.03	2633.87	3261.85	3053.25	2502.49	2971.67	2757.03	2852.83	3121.31	3264.89
Q8C2E7	Washc5	WASH complex subunit 5	25	6.49028	4.82293	5.45564	6.60528	5.02558	5.33722	6.87051	5.2642	5.26219	6.26892	4.92609	5.17404	6.05734	5.14528	5.24408	6.16402	5.033	4.85341	3294.26	2447.97	2769.11	3352.63	2550.82	2709	3487.25	2671.94	2670.92	3181.9	2500.32	2626.18	3074.51	2611.58	2661.73	3128.66	2554.59	2463.43
Q6PAR5	Gapvd1	GTPase-activating protein and VPS9 domain-containing protein 1	25	5.87609	5.18797	5.59256	5.51638	5.29411	5.72917	5.77804	5.05563	5.2941	5.76503	5.42556	5.56562	5.91099	5.56989	5.63854	5.63516	5.4716	5.69357	3205.51	2830.12	3050.83	3009.28	2888.03	3125.36	3152.02	2757.93	2888.02	3144.92	2959.73	3036.14	3224.54	3038.47	3075.91	3074.07	2984.85	3105.94
Q6P069	Sri	Sorcin	25	5.99272	5.91475	4.45641	6.2447	6.30669	5.05107	7.60515	7.6402	5.92096	5.55648	5.06225	4.1292	5.75264	5.24155	4.26605	5.74691	4.89225	4.22003	1815.12	1791.5	1349.79	1891.44	1910.21	1529.9	2303.5	2314.11	1793.38	1682.98	1533.29	1250.68	1742.4	1587.6	1292.13	1740.66	1481.8	1278.19
Q8VEE1	Lmcd1	LIM and cysteine-rich domains protein 1	25	4.29968	1.49042	11.6221	4.59204	1.67259	14.7454	4.78391	1.44887	14.7506	5.02522	2.43086	5.28211	4.1949	3.39337	3.46207	5.54034	2.90494	8.36067	2071.11	717.921	5598.23	2211.94	805.668	7102.71	2304.36	697.905	7105.19	2420.6	1170.92	2544.34	2020.64	1634.55	1667.64	2668.73	1399.28	4027.25
Q3TC93	Hs1bp3	HCLS1-binding protein 3	25	5.16563	4.42231	6.8588	5.38965	4.8131	6.76808	5.44367	4.96434	7.56207	5.3579	4.44551	6.32555	5.051	4.73418	6.70691	5.36045	4.47092	6.15991	2001.91	1713.84	2658.08	2088.72	1865.29	2622.93	2109.66	1923.9	2930.63	2076.42	1722.83	2451.43	1957.48	1834.7	2599.22	2077.41	1732.68	2387.23
Q8BX70	Vps13c	Vacuolar protein sorting-associated protein 13C	25	2.16489	3.9919	8.9317	2.3712	3.38345	8.88347	2.40226	2.6473	8.52129	2.61618	4.88586	12.5033	2.64849	3.14809	13.6071	2.61538	4.17571	10.5025	791.815	1460.05	3266.8	867.275	1237.51	3249.16	878.633	968.26	3116.69	956.876	1787.02	4573.13	968.694	1151.43	4976.83	956.583	1527.28	3841.32
F8VQ05	Fryl	FRY-like transcription coactivator	25	4.72892	5.5315	5.54267	4.59752	5.74582	5.66477	4.882	6.19271	5.10325	4.54169	5.85871	6.5128	4.78685	6.24647	6.78062	4.93142	6.11911	6.23316	2026.26	2370.15	2374.94	1969.96	2461.99	2427.26	2091.86	2653.47	2186.66	1946.04	2510.36	2790.62	2051.08	2676.51	2905.38	2113.03	2621.94	2670.81
Q80TV8	Clasp1	CLIP-associating protein 1	25	6.6842	5.36334	3.59402	6.48251	5.41463	3.90421	6.43017	5.40823	3.23474	7.2044	6.06938	4.57533	7.24643	6.79813	4.20292	7.09753	5.93864	4.35118	1577.47	1265.75	848.188	1529.87	1277.85	921.393	1517.52	1276.34	763.398	1700.23	1432.37	1079.77	1710.15	1604.36	991.887	1675.01	1401.52	1026.88
Q7TQH0	Atxn2l	Ataxin-2-like protein	25	6.21571	5.57848	4.89127	6.52979	5.74546	4.80377	6.25208	5.76824	4.62414	6.24626	5.59752	4.70553	6.34213	5.54527	4.70239	6.27836	5.29844	4.87517	2316.71	2079.2	1823.07	2433.77	2141.44	1790.46	2330.27	2149.93	1723.5	2328.1	2086.3	1753.84	2363.83	2066.82	1752.67	2340.06	1974.83	1817.07
Q99M51	Nck1	Cytoplasmic protein NCK1	25	8.18667	5.56201	3.31388	8.31599	5.56761	3.15499	7.69548	5.91057	3.08705	8.16462	5.34336	3.43612	6.91897	5.58252	3.38639	7.61777	5.24907	3.50692	2337.67	1588.21	946.268	2374.6	1589.81	900.895	2197.42	1687.74	881.497	2331.38	1525.78	981.173	1975.69	1594.07	966.971	2175.23	1498.85	1001.39
P0C605	Prkg1	cGMP-dependent protein kinase 1	25	6.49852	3.24866	5.6607	7.21573	3.24866	6.45009	6.70316	3.31207	5.32882	6.87372	4.01059	5.5722	7.34393	5.56394	4.82555	7.34204	4.43004	6.37156	3868.06	1933.67	3369.37	4294.95	1933.67	3839.23	3989.86	1971.41	3171.83	4091.38	2387.19	3316.69	4371.26	3311.78	2872.27	4370.13	2636.86	3792.49
P14602	Hspb1	Heat shock protein beta-1	25	4.75992	1.69833	7.2945	5.07685	1.75715	6.70752	4.65754	1.45654	7.51855	6.24674	3.8068	10.1848	5.33408	5.33782	9.27105	5.57947	4.62244	8.68989	2037.96	727.138	3123.14	2173.65	752.322	2871.82	1994.13	623.617	3219.07	2674.54	1629.88	4360.62	2283.78	2285.39	3969.4	2388.85	1979.1	3720.57
Q9JMA1	Usp14	Ubiquitin carboxyl-terminal hydrolase 14	25	5.60096	5.45031	5.15001	5.82844	5.56207	4.9652	6.26749	5.82226	5.50995	5.90385	5.57527	5.04666	5.69329	5.66114	5.6306	5.84341	5.59857	4.89052	1459.18	1419.93	1341.7	1518.44	1449.05	1293.55	1632.82	1516.83	1435.47	1538.09	1452.48	1314.77	1483.23	1474.86	1466.9	1522.34	1458.55	1274.09
Q3THE2	Myl12b	Myosin regulatory light chain 12B	25	6.32556	5.29295	4.30715	6.66587	5.5891	4.50237	7.61698	6.56681	4.85287	6.20954	5.2627	4.37994	6.24097	5.97272	5.07754	6.01563	4.8726	4.24869	1337.25	1118.95	910.547	1409.19	1181.56	951.818	1610.26	1388.25	1025.91	1312.72	1112.55	925.935	1319.36	1262.66	1073.41	1271.73	1030.09	898.189
P35278	Rab5c	Ras-related protein Rab-5C	25	5.61237	4.93181	7.48864	5.71974	5.11607	6.50092	5.71688	5.16846	6.79979	5.05578	4.58875	5.91443	5.19873	4.30297	6.01869	5.21289	4.45527	6.19781	2214.62	1946.08	2954.99	2256.99	2018.78	2565.24	2255.86	2039.46	2683.18	1994.99	1810.71	2333.82	2051.4	1697.94	2374.96	2056.99	1758.04	2445.64
Q9QZE7	Tsnax	Translin-associated protein X	25	6.47122	5.91185	5.30813	6.14538	5.57649	5.13312	6.26447	5.77666	5.64867	6.40547	5.57362	4.75174	5.76287	4.77856	4.70644	5.79122	5.13939	4.8547	2333.61	2131.9	1914.19	2216.11	2010.96	1851.08	2259.06	2083.15	2036.99	2309.9	2009.93	1713.55	2078.17	1723.22	1697.21	2088.4	1853.34	1750.67
Q8BK64	Ahsa1	Activator of 90 kDa heat shock protein ATPase homolog 1	25	5.46199	5.63583	5.80767	5.24119	5.39498	6.01592	4.95876	4.98824	4.77425	5.69943	5.68465	5.8497	5.80218	6.0899	5.2498	5.92625	5.38852	6.03075	1942.6	2004.42	2065.54	1864.07	1918.77	2139.61	1763.62	1774.1	1698	2027.04	2021.79	2080.49	2063.59	2165.92	1867.13	2107.71	1916.47	2144.88
P62281	Rps11	40S ribosomal protein S11	25	5.57976	5.63009	5.22658	5.33873	5.24273	5.30794	5.14895	5.14095	4.62196	5.74217	5.81393	5.78823	6.22264	6.10198	5.96514	6.00511	5.71644	5.40668	3527.23	3559.05	3303.97	3374.86	3314.18	3355.4	3254.89	3249.84	2921.76	3629.89	3675.26	3659.01	3933.62	3857.35	3770.84	3796.11	3613.63	3417.82
P62962	Pfn1	Profilin-1	25	5.90554	5.31816	4.31716	5.96774	5.98281	4.51723	5.67478	6.47431	4.54917	6.2405	6.07748	4.98722	5.90585	6.03005	4.84098	6.14253	5.85377	5.21474	2587.64	2330.26	1891.65	2614.89	2621.49	1979.32	2486.52	2836.85	1993.31	2734.41	2662.97	2185.26	2587.77	2642.19	2121.18	2691.48	2564.95	2284.95
Q99020	Hnrnpab	Heterogeneous nuclear ribonucleoprotein A/B	25	5.78185	5.68371	5.17753	5.39461	5.89241	6.08269	6.39412	6.55611	5.71802	5.78692	5.23957	4.63325	5.94754	5.60615	4.43542	5.82175	5.12676	4.7216	5040.14	4954.59	4513.35	4702.58	5136.52	5302.39	5573.87	5715.08	4984.5	5044.56	4567.42	4038.89	5184.58	4886.98	3866.43	5074.92	4469.09	4115.9
O55222	Ilk	Integrin-linked protein kinase	25	6.43666	5.89106	3.44878	6.51933	6.50725	4.13502	8.30425	8.1997	4.27497	5.80885	5.55171	3.6628	5.78045	6.27245	3.94683	5.91807	5.92842	3.41339	3364.25	3079.08	1802.58	3407.46	3401.15	2161.25	4340.39	4285.74	2234.4	3036.11	2901.72	1914.44	3021.27	3278.42	2062.89	3093.2	3098.61	1784.08
Q80X50	Ubap2l	Ubiquitin-associated protein 2-like	25	6.62655	6.19963	4.24795	6.50906	5.82255	4.18285	6.34313	5.71445	3.87507	6.66934	5.76615	4.38549	6.76794	6.11771	3.9764	6.6668	5.58267	4.54626	2832.91	2650.4	1816.03	2782.68	2489.19	1788.2	2711.74	2442.97	1656.63	2851.2	2465.08	1874.83	2893.35	2615.37	1699.94	2850.11	2386.64	1943.57
P62830	Rpl23	60S ribosomal protein L23	25	5.92448	5.49851	5.06131	5.99502	5.82993	4.89988	5.75566	5.61656	4.84663	5.80389	5.75502	5.12534	6.10591	5.83873	5.32277	5.92301	5.80265	4.89468	3208.69	2977.99	2741.2	3246.9	3157.48	2653.77	3117.26	3041.92	2624.93	3143.38	3116.91	2775.88	3306.95	3162.25	2882.81	3207.89	3142.71	2650.95
P16125	Ldhb	L-lactate dehydrogenase B chain	25	5.04587	7.60266	5.56853	4.81581	8.3639	6.26985	4.31194	8.0549	5.81625	3.67365	5.61296	4.71256	3.72004	5.73579	4.955	4.53054	5.73947	5.47028	3228.07	4863.76	3562.44	3080.89	5350.77	4011.11	2758.54	5153.09	3720.92	2350.2	3590.87	3014.84	2379.88	3669.44	3169.94	2898.39	3671.8	3499.59
P97479	Myo7a	Unconventional myosin-VIIa	25	6.41407	2.24654	4.58164	6.65052	2.12644	4.75005	5.9316	2.08342	4.04715	9.71926	2.69284	6.58077	11.6093	3.17431	9.23634	8.61969	2.99192	6.54418	2120.59	742.742	1514.76	2198.77	703.035	1570.44	1961.08	688.811	1338.05	3213.34	890.296	2175.71	3838.21	1049.48	3053.68	2849.81	989.176	2163.61
Q9DBR7	Ppp1r12a	Protein phosphatase 1 regulatory subunit 12A	25	6.23359	6.56331	4.29006	5.63942	6.31254	4.41253	5.74117	6.81819	4.11023	5.57244	6.31445	4.1424	5.78955	7.30389	4.0306	5.81733	6.42561	4.4827	1989.32	2094.54	1369.08	1799.7	2014.51	1408.17	1832.17	2175.88	1311.69	1778.33	2015.12	1321.96	1847.61	2330.88	1286.28	1856.48	2050.6	1430.56
A2AFQ2	Hsd17b10	Isoform of O08756, 3-hydroxyacyl-CoA dehydrogenase type-2	25	5.12308	6.58793	6.18265	5.13272	6.79725	5.73159	5.08045	6.90288	6.36758	4.42993	5.77765	5.36402	4.1379	4.95752	5.18981	4.70584	5.82755	5.70365	1961.52	2522.37	2367.2	1965.21	2602.52	2194.5	1945.19	2642.96	2438.01	1696.12	2212.14	2053.77	1584.31	1898.12	1987.07	1801.76	2231.24	2183.8
Q91V41	Rab14	Ras-related protein Rab-14	25	6.19	6.1073	4.97882	5.96153	6.32853	4.65265	5.86322	6.11105	4.76271	5.7523	5.7718	4.78553	5.71319	5.64452	4.99305	5.77007	5.76731	4.84643	3452.07	3405.95	2776.62	3324.66	3529.33	2594.72	3269.83	3408.05	2656.09	3207.98	3218.85	2668.82	3186.16	3147.86	2784.55	3217.88	3216.34	2702.78
Q8BWY3	Etf1	Eukaryotic peptide chain release factor subunit 1	25	5.34608	4.84633	5.77354	5.30352	4.86352	6.86874	5.66015	5.01931	5.95055	5.62772	5.12205	6.12921	5.82109	5.09029	6.02752	5.72936	4.93828	5.88273	1836.92	1665.21	1983.8	1822.3	1671.12	2360.12	1944.84	1724.65	2044.62	1933.7	1759.95	2106.01	2000.14	1749.03	2071.07	1968.62	1696.8	2021.32
Q99KD5	Unc45a	Protein unc-45 homolog A	24	5.38738	5.3869	6.31371	5.26638	5.16649	6.03974	5.07625	4.92677	5.59921	5.34148	5.17652	6.27617	5.38489	5.49477	6.55318	5.31406	5.09524	6.20086	2614.93	2614.7	3064.55	2556.2	2507.72	2931.57	2463.91	2391.36	2717.75	2592.65	2512.58	3046.33	2613.72	2667.06	3180.78	2579.34	2473.13	3009.78
Q9CQN1	Trap1	Heat shock protein 75 kDa, mitochondrial	24	3.36379	6.65121	6.50855	3.17698	6.35404	6.66176	3.1896	5.06017	5.99677	3.97264	7.36888	7.04438	4.3507	5.74779	7.24578	3.84845	6.75483	6.70368	1256.46	2484.39	2431.1	1186.68	2373.38	2488.33	1191.39	1890.09	2239.94	1483.88	2752.45	2631.24	1625.09	2146.94	2706.47	1437.49	2523.09	2503.98
Q6NXL1	Sec24d	Sec24-related gene family, member D (S. cerevisiae)	24	6.88008	3.78774	4.92567	7.35894	4.06592	5.44121	8.36622	4.85226	5.99153	7.63059	3.83443	4.69724	7.85393	4.35019	4.72818	6.97956	3.73815	4.51816	2431.88	1338.84	1741.06	2601.14	1437.17	1923.29	2957.18	1715.11	2117.81	2697.16	1355.35	1660.32	2776.11	1537.65	1671.26	2467.04	1321.31	1597.02
Q9QX47	Son	Protein SON	24	6.18539	6.03108	5.27412	6.536	5.75562	4.73	5.72163	5.53755	4.50608	6.03547	5.66818	4.72737	6.23727	5.82685	4.75356	5.81429	5.48491	5.17463	2476.04	2414.27	2111.25	2616.39	2304	1893.44	2290.39	2216.7	1803.8	2416.02	2268.99	1892.38	2496.8	2332.51	1902.87	2327.48	2195.63	2071.42
Q8BTI8	Srrm2	Serine/arginine repetitive matrix protein 2	24	5.76279	5.43269	5.47617	5.69844	4.94187	5.61053	5.64719	5.64838	5.91374	5.64709	5.17968	5.56796	6.20699	5.58718	5.28371	5.68442	5.09098	5.6202	1619.12	1526.38	1538.59	1601.04	1388.48	1576.34	1586.64	1586.98	1661.53	1586.61	1455.29	1564.38	1743.92	1569.78	1484.52	1597.1	1430.37	1579.06
Q64674	Srm	Spermidine synthase	24	4.67497	4.88203	6.99169	5.07221	5.33333	6.59729	5.49069	5.64036	9.23	4.8041	4.98129	6.212	4.71126	4.35971	6.13856	4.61558	4.45915	5.80579	1891.39	1975.17	2828.69	2052.11	2157.75	2669.12	2221.42	2281.97	3734.26	1943.64	2015.32	2513.24	1906.07	1763.85	2483.53	1867.37	1804.08	2348.9
P97351	Rps3a	40S ribosomal protein S3a	24	5.4888	5.43099	5.36542	5.95951	5.51503	5.18396	5.75885	5.65888	5.83376	5.65129	5.69494	5.34764	5.87311	5.49401	5.51335	5.72782	5.40439	5.09827	2571.77	2544.68	2513.95	2792.31	2584.05	2428.93	2698.3	2651.46	2733.4	2647.9	2668.35	2505.62	2751.83	2574.2	2583.27	2683.76	2532.21	2388.78
Q7TSC1	Prrc2a	Protein PRRC2A	24	6.28544	5.57807	5.6238	6.38999	4.98347	5.17486	5.64686	4.78896	5.0543	6.13188	5.18011	5.37016	6.26799	5.65909	5.25391	6.32011	4.89246	5.39856	2602.23	2309.38	2328.31	2645.52	2063.21	2142.44	2337.86	1982.68	2092.53	2538.66	2144.62	2223.3	2595.01	2342.92	2175.17	2616.59	2025.53	2235.06
Q8C7X2	Emc1	ER membrane protein complex subunit 1	24	4.57537	5.18243	7.18912	5.48698	5.72514	5.93731	4.96128	5.39681	7.65997	4.29138	5.22352	6.40873	4.3888	4.66288	6.85843	4.45001	5.14131	6.46053	2026.99	2295.93	3184.94	2430.85	2536.36	2630.36	2197.95	2390.9	3393.53	1901.17	2314.13	2839.2	1944.33	2065.76	3038.43	1971.45	2277.71	2862.15
Q61035	Hars1	Histidine--tRNA ligase, cytoplasmic	24	5.63821	4.96589	5.98043	5.33631	5.00945	6.45686	5.66692	4.92414	5.9333	5.6153	4.84752	5.96484	5.65453	5.26702	6.17994	5.92409	4.60041	6.03485	2068.1	1821.49	2193.62	1957.36	1837.47	2368.38	2078.63	1806.17	2176.34	2059.69	1778.07	2187.9	2074.08	1931.94	2266.8	2172.96	1687.43	2213.58
Q99P88	Nup155	Nuclear pore complex protein Nup155	24	5.68566	5.22293	6.29091	5.90852	5.53423	6.37128	5.72044	5.67977	6.26808	5.17418	5.24873	5.28205	5.09425	4.91876	5.16087	5.16399	5.63443	5.64091	2488.59	2286.06	2753.51	2586.14	2422.31	2788.69	2503.82	2486.01	2743.52	2264.72	2297.35	2311.93	2229.73	2152.92	2258.89	2260.26	2466.17	2469
Q9D2G2	Dlst	Dihydrolipoyllysine-residue succinyltransferase component of 2-oxoglutarate dehydrogenase complex, mitochondrial	24	3.90904	6.44853	7.2852	3.91108	6.30202	6.43578	4.15969	6.05367	7.15338	3.72003	6.45599	6.93712	3.62329	5.08776	6.48302	3.57716	5.98798	6.46927	1343.85	2216.88	2504.51	1344.55	2166.51	2212.49	1430.02	2081.13	2459.19	1278.87	2219.44	2384.84	1245.61	1749.07	2228.74	1229.76	2058.55	2224.01
P35550	Fbl	rRNA 2'-O-methyltransferase fibrillarin	24	4.64607	4.96763	7.59174	4.72138	5.42057	7.37537	4.84739	5.31479	7.58487	4.24665	5.17909	6.5537	4.45657	4.61566	6.47492	4.38991	5.15955	6.45413	2703.41	2890.52	4417.4	2747.23	3154.06	4291.51	2820.55	3092.51	4413.4	2471	3013.56	3813.4	2593.14	2685.71	3767.56	2554.36	3002.19	3755.46
Q8K297	Colgalt1	Procollagen galactosyltransferase 1	24	6.53173	5.08909	5.4361	6.54111	5.34558	4.62634	6.15163	5.04961	5.00229	6.19873	5.08905	5.33008	6.8523	4.59069	6.50223	5.94159	4.89065	4.83121	2566.65	1999.76	2136.12	2570.34	2100.55	1817.92	2417.29	1984.25	1965.65	2435.8	1999.75	2094.46	2692.62	1803.92	2555.06	2334.75	1921.79	1898.43
P35123	Usp4	Ubiquitin carboxyl-terminal hydrolase 4	24	6.10794	6.27423	4.40798	6.4333	6.49647	4.26902	6.07032	6.59937	4.48834	5.89304	6.21428	4.21231	6.01007	6.35758	3.8158	5.87941	6.33236	4.13819	1573.4	1616.24	1135.49	1657.22	1673.49	1099.7	1563.71	1700	1156.19	1518.05	1600.8	1085.09	1548.19	1637.71	982.948	1514.53	1631.21	1066
Q3THK7	Gmps	GMP synthase [glutamine-hydrolyzing]	24	5.34901	5.99396	5.36886	5.322	5.99679	5.43893	5.58434	5.69823	5.29501	5.54305	5.93855	5.67676	5.26443	5.49091	5.51242	5.28022	5.66912	5.57742	1371.17	1536.5	1376.26	1364.25	1537.22	1394.22	1431.5	1460.69	1357.33	1420.91	1522.3	1455.19	1349.49	1407.55	1413.06	1353.54	1453.23	1429.72
O88487	Dync1i2	Cytoplasmic dynein 1 intermediate chain 2	24	5.96895	5.40509	5.99252	6.15095	5.6875	5.22995	6.12386	5.8388	6.79369	5.6744	5.01975	4.82334	5.6263	5.37655	4.6967	5.46528	5.05447	5.0719	2228.23	2017.73	2237.03	2296.17	2123.16	1952.35	2286.05	2179.64	2536.1	2118.27	1873.89	1800.57	2100.31	2007.08	1753.29	2040.2	1886.85	1893.36
Q9R1T4	Septin6	Septin-6	24	6.21709	6.29957	4.24095	6.37245	5.71499	4.51191	6.45726	5.4999	3.51495	7.10072	5.85931	4.38064	6.81925	6.24618	4.03374	6.97	5.3709	4.39019	3696.27	3745.31	2521.39	3788.63	3397.75	2682.48	3839.06	3269.88	2089.76	4221.61	3483.55	2604.44	4054.27	3713.56	2398.19	4143.9	3193.18	2610.11
Q5SVR0	Tbc1d9b	TBC1 domain family member 9B	24	7.02193	5.83651	4.44751	6.88122	6.09487	4.26174	6.57424	6.27372	3.9811	6.57655	5.69326	4.09839	6.25452	5.41615	4.24797	6.48857	5.54439	4.30734	2702.34	2246.14	1711.59	2648.19	2345.57	1640.1	2530.05	2414.4	1532.1	2530.94	2191.01	1577.24	2407.01	2084.37	1634.8	2497.09	2133.72	1657.65
Q8VHM5	Hnrnpr	Heterogeneous nuclear ribonucleoprotein R	24	7.03632	6.31732	4.19313	8.01838	6.87706	4.00304	7.77168	7.39348	4.51367	5.99876	5.6254	3.01795	5.8677	5.67382	2.99097	6.07603	5.32741	3.29787	5523.59	4959.17	3291.66	6294.52	5398.57	3142.43	6100.86	5803.97	3543.29	4709.1	4416	2369.12	4606.21	4454.02	2347.95	4769.76	4182.08	2588.86
P10649	Gstm1	Glutathione S-transferase Mu 1	24	6.04796	6.71286	2.88212	5.63787	7.55317	3.19238	9.22039	11.673	3.7501	5.16242	6.27339	2.81911	4.40858	6.77724	3.28672	5.3118	6.31727	2.97368	1747.2	1939.28	832.617	1628.72	2182.04	922.248	2663.68	3372.21	1083.37	1491.37	1812.32	814.415	1273.6	1957.88	949.501	1534.53	1825	859.066
P15626	Gstm2	Glutathione S-transferase Mu 2	24	6.86529	4.8049	4.10251	6.9993	4.81403	3.81607	6.90524	4.67041	3.33331	8.01397	4.48462	4.67766	8.07819	5.72141	5.4185	7.85389	4.69145	4.74926	3407.04	2384.52	2035.95	3473.54	2389.06	1893.8	3426.86	2317.79	1654.22	3977.09	2225.58	2321.38	4008.96	2839.36	2689.04	3897.65	2328.22	2356.91
P48774	Gstm5	Glutathione S-transferase Mu 5	24	8.47039	5.42604	4.19996	8.24124	5.87174	4.1223	8.22634	5.96561	3.60794	6.29371	4.67337	3.86039	5.70467	4.58347	4.14411	7.4814	5.07801	4.04931	4220.92	2703.88	2092.9	4106.73	2925.97	2054.2	4099.3	2972.75	1797.89	3136.25	2328.81	1923.69	2842.72	2284.01	2065.07	3728.09	2530.45	2017.83
O08797	Serpinb9	SPI6	24	7.63845	3.51577	4.74136	7.86768	3.89822	4.25036	6.65383	3.41873	2.98715	8.29384	3.57404	5.68235	7.52052	4.40526	7.32429	8.06419	3.97569	6.18826	3918.74	1803.69	2432.45	4036.34	1999.9	2180.55	3413.6	1753.9	1532.49	4254.97	1833.58	2915.2	3858.23	2260.02	3757.56	4137.15	2039.64	3174.75
Q9JJ28	Flii	Protein flightless-1 homolog	24	5.45199	4.6173	5.45292	5.97284	4.81574	5.4374	5.74914	4.75483	4.96203	5.96951	4.90064	6.07585	6.15591	5.8199	6.54313	6.20647	5.24525	5.86914	1960.73	1660.54	1961.06	2148.04	1731.91	1955.48	2067.59	1710.01	1784.52	2146.85	1762.44	2185.09	2213.88	2093.04	2353.14	2232.07	1886.38	2110.75
P10493	Nid1	Nidogen-1	24	7.92838	3.61884	4.00427	11.0069	3.66921	2.82931	8.79457	3.58998	3.45754	9.59025	4.63001	4.89414	7.20096	3.40358	5.04435	6.50028	5.05552	4.78192	3833.52	1749.78	1936.14	5322.04	1774.13	1368.03	4252.34	1735.82	1671.79	4637.07	2238.7	2366.41	3481.8	1645.7	2439.04	3143.01	2444.44	2312.15
A0A571BEN1	Mybpc1	Myosin-binding protein C, slow-type	24	1.40807	2.38132	1.9282	2.69447	4.58237	3.22559	1.76424	3.71871	2.69056	5.93411	14.1301	6.11961	4.44735	14.6627	4.27152	5.51349	15.2942	5.23343	586.145	991.285	802.664	1121.64	1907.53	1342.74	734.41	1548.01	1120.01	2470.23	5882.02	2547.45	1851.33	6103.72	1778.13	2295.14	6366.62	2178.55
Q9WUA2	Farsb	Phenylalanine--tRNA ligase beta subunit	24	5.51294	5.08466	5.89209	5.63955	5.16587	5.9521	5.80249	5.17346	5.98167	5.60735	5.36543	6.00151	5.52593	4.97412	6.01605	5.47698	5.1115	5.71629	2146.38	1979.64	2293.99	2195.67	2011.25	2317.36	2259.11	2014.21	2328.87	2183.14	2088.95	2336.6	2151.44	1936.6	2342.26	2132.38	1990.08	2225.55
Q8JZQ9	Eif3b	Eukaryotic translation initiation factor 3 subunit B	24	5.57216	5.72481	5.44776	5.59164	5.49272	5.40316	5.25358	5.3347	5.16302	5.5108	5.61249	5.72211	5.84995	5.7524	5.615	5.74002	5.48152	5.73215	2443.95	2510.91	2389.39	2452.5	2409.11	2369.83	2304.23	2339.8	2264.51	2417.04	2461.64	2509.72	2565.79	2523.01	2462.74	2517.58	2404.2	2514.13
Q7TNL5	Ppp2r5d	Serine/threonine-protein phosphatase 2A 56 kDa regulatory subunit	24	5.25189	6.09291	5.30043	4.83014	6.00911	5.46258	4.87341	5.65781	5.20813	5.47484	6.39032	5.85287	5.14091	6.23899	5.7274	5.14028	5.91188	5.4361	3173.5	3681.69	3202.83	2918.65	3631.06	3300.81	2944.8	3418.78	3147.06	3308.22	3861.41	3536.65	3106.44	3769.97	3460.83	3106.06	3572.31	3284.81
Q8VCT3	Rnpep	Aminopeptidase B	24	4.1903	6.69057	5.94914	3.82063	6.66176	6.39761	4.07826	6.92102	6.54251	4.21837	6.57282	5.8121	3.87973	5.91622	6.93413	3.78271	5.91228	5.71983	2252.89	3597.15	3198.52	2054.14	3581.65	3439.64	2192.65	3721.04	3517.54	2267.98	3533.83	3124.84	2085.92	3180.82	3728.09	2033.75	3178.7	3075.23
Q91Z67	Srgap2	SLIT-ROBO Rho GTPase-activating protein 2	24	5.70639	5.2126	4.38889	5.71678	5.43718	5.04659	6.8494	6.72221	5.23657	6.16636	5.85178	4.59619	5.82253	6.24528	4.76759	6.05195	5.55579	4.62593	2217.12	2025.27	1705.22	2221.15	2112.52	1960.77	2661.22	2611.79	2034.58	2395.83	2273.61	1785.77	2262.24	2426.49	1852.36	2351.38	2158.6	1797.32
Q8CHG3	Gcc2	GRIP and coiled-coil domain-containing protein 2	24	6.02198	4.79093	5.86238	6.01151	4.38797	5.21185	5.76696	4.11398	5.01992	7.09241	5.12617	5.90501	6.86298	4.54479	6.23045	6.62407	4.66023	5.7664	1881.41	1496.8	1831.55	1878.14	1370.91	1628.31	1801.74	1285.31	1568.34	2215.84	1601.54	1844.87	2144.16	1419.9	1946.54	2069.52	1455.97	1801.56
Q9Z1E4	Gys1	Glycogen [starch] synthase, muscle	24	7.35264	6.19403	2.27807	7.26621	6.03918	2.9672	6.46445	5.28632	2.00331	7.42481	6.89052	4.01592	7.96865	5.82649	3.82748	7.95754	6.43084	3.80634	1317.25	1109.68	408.123	1301.76	1081.94	531.584	1158.13	947.061	358.899	1330.18	1234.46	719.464	1427.61	1043.83	685.705	1425.62	1152.1	681.918
Q9JLV5	Cul3	Cullin-3	24	6.24892	5.31824	5.38351	6.38883	5.21509	5.25931	5.74582	4.95175	4.88248	6.32367	5.15776	5.29654	6.23383	5.65912	5.17841	6.26687	5.16646	5.32341	3116.36	2652.22	2684.77	3186.13	2600.78	2622.83	2865.46	2469.45	2434.91	3153.63	2572.19	2641.4	3108.83	2822.22	2582.49	3125.31	2576.53	2654.8
P45952	Acadm	Medium-chain specific acyl-CoA dehydrogenase, mitochondrial	24	4.26772	11.853	3.8063	3.72567	11.091	3.93133	3.72071	9.59422	3.74884	3.60152	8.58867	3.72877	3.14083	6.06677	3.64207	3.75054	7.84195	3.90013	2316.09	6432.59	2065.68	2021.92	6019.07	2133.53	2019.23	5206.78	2034.49	1954.54	4661.07	2023.6	1704.53	3292.43	1976.55	2035.41	4255.82	2116.6
P52825	Cpt2	Carnitine O-palmitoyltransferase 2, mitochondrial	24	5.27034	8.92586	3.646	4.94104	8.14933	4.36268	6.43284	9.2723	5.44263	5.20431	7.11408	3.22885	4.73977	5.1338	3.22223	4.79835	6.69552	3.42008	1774.76	3005.74	1227.77	1663.87	2744.25	1469.11	2166.23	3122.4	1832.78	1752.53	2395.63	1087.3	1596.09	1728.78	1085.07	1615.82	2254.69	1151.7
P47911	Rpl6	60S ribosomal protein L6	24	6.10823	5.80695	5.19956	5.58364	5.72546	5.03357	5.74435	5.62803	4.25662	5.71515	5.95023	5.34174	6.27678	5.92249	5.27648	5.77911	5.63854	5.01308	3915.76	3722.62	3333.24	3579.46	3670.38	3226.83	3682.49	3607.92	2728.76	3663.77	3814.47	3424.39	4023.81	3796.69	3382.55	3704.77	3614.66	3213.7
P11688	Itga5	Integrin alpha-5	24	5.93508	4.13111	5.57568	5.5003	4.12166	5.46124	6.6009	4.36279	5.1384	6.73544	4.55786	6.28189	6.88981	4.93419	6.81092	6.08912	4.4401	6.43351	2095.05	1458.26	1968.18	1941.57	1454.92	1927.78	2330.08	1540.04	1813.83	2377.57	1608.9	2217.47	2432.06	1741.74	2404.22	2149.42	1567.33	2270.99
Q8CGK3	Lonp1	Lon protease homolog, mitochondrial	24	3.79903	4.88225	6.80286	3.8993	4.62431	7.3875	3.86593	4.47623	7.13468	5.01943	5.19605	7.84113	4.85114	5.75587	7.53104	4.57586	5.26284	7.09453	2137.1	2746.45	3826.86	2193.5	2601.35	4155.75	2174.73	2518.05	4013.52	2823.62	2922.97	4410.93	2728.94	3237.89	4236.49	2574.09	2960.55	3990.94
P62717	Rpl18a	60S ribosomal protein L18a	24	5.89225	5.49694	4.90521	5.81963	5.5065	4.90212	5.92082	5.89579	4.8444	5.95668	6.18525	5.1347	6.37455	5.42119	5.23266	6.00291	5.88106	4.62733	2984.84	2784.59	2484.84	2948.06	2789.44	2483.27	2999.32	2986.64	2454.04	3017.49	3133.27	2601.09	3229.16	2746.22	2650.72	3040.9	2979.18	2344.07
Q8CJG0	Ago2	Protein argonaute-2	24	6.22656	5.27696	4.92226	6.29468	5.78988	5.17601	6.85905	5.97009	5.38121	5.82395	5.56813	4.78707	5.67434	5.16556	4.93141	5.7489	5.53186	4.8721	2059.15	1745.12	1627.81	2081.68	1914.74	1711.73	2268.32	1974.34	1779.59	1926.01	1841.41	1583.11	1876.53	1708.27	1630.84	1901.19	1829.41	1611.23
Q99KY4	Gak	Cyclin-G-associated kinase	24	7.23037	6.09294	3.82124	7.16325	6.24298	3.55758	6.98616	6.19156	3.3326	6.52878	5.77736	3.85365	6.92915	5.94333	4.17668	6.74143	5.71172	3.71924	2665.75	2246.39	1408.85	2641.01	2301.71	1311.64	2575.71	2282.75	1228.69	2407.08	2130.04	1420.79	2554.69	2191.24	1539.89	2485.48	2105.84	1371.24
Q9QUM9	Psma6	Proteasome subunit alpha type-6	24	4.8061	4.74132	4.64462	4.39247	4.88781	8.57628	7.93636	8.06935	9.02394	4.66691	4.71741	4.88311	4.66673	5.00229	4.68202	4.6027	4.60708	5.09349	2179.71	2150.33	2106.47	1992.11	2216.76	3889.59	3599.37	3659.69	4092.62	2116.58	2139.48	2214.63	2116.5	2268.69	2123.43	2087.46	2089.45	2310.04
Q3UEB3	Puf60	Poly(U)-binding-splicing factor PUF60	24	6.61983	5.61392	4.99135	6.88246	5.53841	4.5271	6.57614	5.72423	4.54426	6.55751	5.32965	4.2731	6.61556	5.60177	4.254	6.25052	5.16298	4.93722	3955.4	3354.36	2982.37	4112.32	3309.25	2704.98	3929.3	3420.27	2715.23	3918.17	3184.51	2553.21	3952.85	3347.1	2541.8	3734.73	3084.92	2950.03
P47856	Gfpt1	Glutamine--fructose-6-phosphate aminotransferase [isomerizing] 1	24	4.31001	3.16314	10.6871	4.05633	3.0916	10.4849	4.15617	2.88292	9.93015	4.54767	3.31677	8.00359	4.84032	3.13122	6.96036	4.62987	3.44194	8.36588	1810.3	1328.58	4488.81	1703.74	1298.54	4403.9	1745.68	1210.89	4170.87	1910.12	1393.11	3361.68	2033.04	1315.18	2923.5	1944.64	1445.69	3513.84
Q8CFX1	H6pd	GDH/6PGL endoplasmic bifunctional protein	24	6.0269	4.52631	6.05582	6.63555	4.55079	5.62491	7.0504	4.64996	6.50156	5.87259	4.18249	5.34801	6.22772	4.6232	6.43912	6.21654	4.26087	5.20726	2084.85	1565.76	2094.86	2295.4	1574.23	1945.8	2438.91	1608.54	2249.05	2031.47	1446.83	1850.01	2154.32	1599.28	2227.45	2150.46	1473.94	1801.32
Q8VI75	Ipo4	Importin-4	24	5.59936	5.50594	4.53857	5.131	5.69442	5.44224	6.46956	6.92141	4.87129	5.38506	6.09646	5.04217	5.50383	6.23985	5.17226	5.47251	5.78193	5.13213	2416.75	2376.43	1958.9	2214.6	2457.78	2348.94	2792.34	2987.36	2102.51	2324.26	2631.31	2176.26	2375.52	2693.2	2232.41	2362	2495.55	2215.09
Q6NWW9	Fndc3b	Fibronectin type III domain-containing protein 3B	24	7.54613	3.85553	4.32615	7.82298	4.1869	4.30908	8.8377	4.75981	4.79705	8.19952	4.31116	4.46305	7.88661	3.94138	4.74683	7.3719	4.4723	4.16593	2658.74	1358.42	1524.24	2756.28	1475.18	1518.22	3113.8	1677.03	1690.15	2888.95	1518.96	1572.47	2778.7	1388.67	1672.46	2597.35	1575.73	1467.79
Q9QZM0	Ubqln2	Ubiquilin-2	24	5.67151	5.47673	5.90681	5.98499	5.3808	4.76378	5.6965	5.08248	5.98728	6.36793	5.06845	5.08895	6.20262	5.10658	5.43959	6.28179	5.27358	5.21963	2103.08	2030.85	2190.33	2219.32	1995.28	1766.48	2112.35	1884.66	2220.17	2361.32	1879.45	1887.06	2300.02	1893.6	2017.08	2329.38	1955.52	1935.52
Q80U35	Arhgef17	Rho guanine nucleotide exchange factor 17	24	6.44009	5.839	3.86985	7.24612	5.86198	3.41958	7.01415	6.42407	3.52016	6.21929	6.21634	4.48444	6.20222	6.92228	4.10663	6.10756	6.30106	3.80517	1966.97	1783.38	1181.95	2213.15	1790.4	1044.43	2142.3	1962.07	1075.15	1899.53	1898.63	1369.66	1894.31	2114.24	1254.27	1865.4	1924.5	1162.19
Q9D7N9	Apmap	Adipocyte plasma membrane-associated protein	24	3.41481	9.42491	5.20442	2.9543	9.15048	5.49626	4.09497	9.2206	5.5715	2.81903	8.41628	4.88273	3.17407	4.90249	5.08491	3.26131	7.693	5.23393	787.539	2173.62	1200.27	681.335	2110.33	1267.57	944.402	2126.5	1284.93	650.139	1941	1126.08	732.019	1130.64	1172.71	752.14	1774.2	1207.07
Q8BRT1	Clasp2	CLIP-associating protein 2	24	8.83101	5.25992	3.32443	8.07684	4.91155	3.44844	7.8684	5.15911	2.52337	8.03626	5.59571	3.41579	7.26886	6.07945	3.33519	7.99056	5.30405	3.57105	2626.05	1564.13	988.575	2401.79	1460.53	1025.45	2339.8	1534.15	750.369	2389.72	1663.98	1015.74	2161.52	1807.83	991.776	2376.13	1577.25	1061.91
Q8C3W1	Q8C3W1	Uncharacterized protein C1orf198 homolog	24	8.05959	4.73191	2.34472	8.83439	4.43478	2.29947	7.83234	4.46469	1.62613	9.87898	4.79395	2.71184	10.0275	7.14193	2.91051	10.0236	4.93972	2.94402	3566.59	2094	1037.6	3909.46	1962.51	1017.58	3466.03	1975.75	719.607	4371.72	2121.45	1200.07	4437.44	3160.5	1287.98	4435.7	2185.96	1302.81
Q61656	Ddx5	Probable ATP-dependent RNA helicase DDX5	24	5.93762	5.61834	6.06805	5.75082	5.78445	5.74935	5.93877	5.1613	5.54039	5.57854	5.38012	5.18619	6.07724	5.25848	4.95514	5.39777	5.50528	5.11215	2722.71	2576.31	2782.52	2637.05	2652.47	2636.38	2723.24	2366.73	2540.56	2558.05	2467.07	2378.14	2786.73	2411.29	2272.19	2475.16	2524.46	2344.19
Q91V55	Rps5	Isoform of P97461, 40S ribosomal protein S5	24	5.48284	5.32095	4.99648	5.17777	5.4125	5.77037	6.17991	6.16425	6.14559	5.56512	5.76852	5.2918	5.80938	5.47496	5.49294	5.58339	5.37682	4.98639	1846.8	1792.27	1682.98	1744.04	1823.11	1943.65	2081.59	2076.32	2070.03	1874.51	1943.02	1782.45	1956.78	1844.14	1850.2	1880.67	1811.09	1679.58
Q6ZQI3	Mlec	Malectin	24	4.72439	4.14873	6.50193	4.64546	4.14816	7.20246	5.49489	5.01025	7.19614	4.69379	4.77724	7.22966	5.16212	4.37318	7.2196	5.26686	4.67928	7.52586	2943.04	2584.43	4050.35	2893.87	2584.08	4486.75	3423.03	3121.12	4482.81	2923.98	2975.97	4503.69	3215.72	2724.26	4497.43	3280.97	2914.94	4688.21
Q8K4Z5	Sf3a1	Splicing factor 3A subunit 1	24	6.32111	5.67358	5.80556	7.37776	6.09388	4.86016	6.57901	6.06999	5.81207	5.66776	5.10761	4.38994	5.7541	5.15311	4.13806	5.87592	4.84708	4.4733	3098.53	2781.12	2845.82	3616.49	2987.15	2382.39	3224.95	2975.44	2849.01	2778.27	2503.69	2151.9	2820.59	2526	2028.43	2880.31	2375.98	2192.76
Q5SUH6	Clint1	Isoform of Q99KN9, Clathrin interactor 1	24	6.97944	5.36727	5.15635	6.81662	5.48921	4.4501	6.55755	5.21568	4.88219	6.43979	5.27204	4.67231	6.57151	5.15393	4.8425	6.35248	5.04559	4.73544	2369.86	1822.45	1750.83	2314.57	1863.85	1511.02	2226.61	1770.98	1657.74	2186.62	1790.12	1586.48	2231.35	1750.01	1644.26	2156.98	1713.22	1607.91
Q7M6Y3-5	Picalm	Isoform of Q7M6Y3, Isoform 5 of Phosphatidylinositol-binding clathrin assembly protein	24	8.13217	6.3544	3.02013	7.63747	6.20129	3.05875	7.25229	5.70922	2.46123	7.81087	5.93607	2.96878	7.41977	5.89826	3.18621	7.81877	5.7379	3.3964	3891.88	3041.08	1445.37	3655.12	2967.8	1463.85	3470.79	2732.31	1177.89	3738.11	2840.87	1420.79	3550.94	2822.78	1524.85	3741.89	2746.03	1625.44
Q921W7	Tes	Isoform of P47226, Testin	24	5.31683	3.84188	6.34363	4.8973	3.40517	6.23888	5.2314	3.60761	5.70006	6.12357	3.47856	8.1725	6.80548	4.0233	10.8805	5.49638	3.30783	7.12913	4895.18	3537.2	5840.55	4508.92	3135.12	5744.1	4816.52	3321.5	5248.01	5637.93	3202.69	7524.38	6265.76	3704.23	10017.6	5060.49	3045.5	6563.75
Q1HFZ0	Nsun2	RNA cytosine C(5)-methyltransferase NSUN2	24	3.40363	3.9469	9.11896	3.51706	4.02636	9.50079	3.62259	4.01811	9.87977	3.57317	4.13341	8.55592	3.6901	3.96202	8.52331	3.38795	4.45333	8.68661	1264.27	1466.06	3387.21	1306.4	1495.58	3529.03	1345.6	1492.51	3669.81	1327.24	1535.34	3178.07	1370.67	1471.68	3165.95	1258.44	1654.17	3226.61
P55302	Lrpap1	Alpha-2-macroglobulin receptor-associated protein	24	5.25343	5.13814	7.72258	5.11724	5.106	5.86738	4.53323	4.47767	8.78703	4.80488	4.74505	6.28746	4.91095	4.34441	6.32112	5.15195	4.63612	6.79538	2380.23	2327.99	3498.95	2318.52	2313.43	2658.4	2053.92	2028.75	3981.24	2177	2149.89	2848.73	2225.06	1968.37	2863.98	2334.25	2100.54	3078.86
Q9D1Q6	Erp44	Endoplasmic reticulum resident protein 44	24	6.7505	4.97583	4.96372	6.72845	4.94543	4.96209	6.50671	4.71985	4.33848	6.79677	4.83309	5.15399	6.85024	5.06649	5.46232	6.86492	4.77429	5.30684	3265.94	2407.34	2401.48	3255.27	2392.63	2400.69	3147.99	2283.5	2098.99	3288.32	2338.28	2493.54	3314.19	2451.2	2642.71	3321.3	2309.84	2567.48
Q3U0J8	Tbc1d2b	TBC1 domain family member 2B	24	4.16629	5.70555	7.39139	4.07674	5.68264	8.19497	4.21745	5.4849	8.0665	4.57603	5.07507	6.08741	4.89109	4.94463	5.57222	4.51803	5.12623	6.22285	1198.97	1641.93	2127.08	1173.2	1635.34	2358.33	1213.69	1578.43	2321.36	1316.88	1460.49	1751.82	1407.55	1422.95	1603.56	1300.19	1475.21	1790.8
Q99104	Myo5a	Unconventional myosin-Va	24	5.08434	4.8859	7.89072	5.27485	4.7233	7.5965	4.98713	4.67314	8.17873	4.87008	4.54024	6.47425	4.69283	4.28157	6.15816	4.79979	4.45848	6.43001	1396.42	1341.92	2167.19	1448.74	1297.26	2086.39	1369.72	1283.48	2246.3	1337.57	1246.98	1778.16	1288.89	1175.94	1691.35	1318.27	1224.53	1766.01
Q9D051	Pdhb	Pyruvate dehydrogenase E1 component subunit beta, mitochondrial	24	4.11898	7.12936	6.2142	3.70481	6.66054	5.99467	3.85068	5.73165	6.34134	3.87557	7.43473	6.78389	3.61645	5.34774	6.23589	3.76	6.89585	6.30367	2149.48	3720.44	3242.87	1933.35	3475.79	3128.31	2009.47	2991.05	3309.22	2022.46	3879.8	3540.16	1887.24	2790.71	3254.19	1962.15	3598.59	3289.56
Q8BMD8	Slc25a24	Calcium-binding mitochondrial carrier protein SCaMC-1	24	3.86622	3.38886	9.01553	3.74749	3.11493	8.69749	3.75067	2.91202	8.58373	3.88485	3.31633	9.87846	3.94302	4.00824	11.1266	4.10917	3.472	9.18443	2156.01	1889.81	5027.54	2089.8	1737.05	4850.18	2091.57	1623.9	4786.75	2166.4	1849.36	5508.76	2198.84	2235.21	6204.77	2291.49	1936.17	5121.73
Q9Z247	Fkbp9	Peptidyl-prolyl cis-trans isomerase FKBP9	24	6.00623	5.44412	4.47793	5.30533	5.40034	5.38804	7.16887	6.16277	5.43976	6.43868	5.42762	4.66027	6.52203	5.25801	5.49122	5.65032	5.0788	4.67966	2619.81	2374.62	1953.19	2314.08	2355.53	2350.16	3126.93	2688.09	2372.72	2808.43	2367.43	2032.72	2844.79	2293.45	2395.17	2464.56	2215.28	2041.18
Q99MR8	Mccc1	Methylcrotonoyl-CoA carboxylase subunit alpha, mitochondrial	24	4.25344	8.27091	5.41757	4.03635	7.92575	6.01607	4.51497	8.00324	5.4897	3.60725	7.10558	5.1031	3.53694	5.28754	5.30705	3.7531	7.14004	5.23138	1522.24	2960.03	1938.86	1444.55	2836.5	2153.05	1615.83	2864.23	1964.68	1290.98	2542.98	1826.32	1265.82	1892.33	1899.31	1343.17	2555.31	1872.23
P47962	Rpl5	60S ribosomal protein L5	24	5.72967	5.42517	5.137	5.70529	5.45256	5.20297	6.12506	6.16924	5.56423	5.7042	5.70423	5.17162	6.00248	5.75162	5.24695	5.71616	5.35432	4.83722	2910.18	2755.52	2609.15	2897.8	2769.43	2642.66	3111	3133.44	2826.15	2897.24	2897.26	2626.74	3048.75	2921.33	2665	2903.32	2719.53	2456.9
O35382	Exoc4	Exocyst complex component 4	24	5.29398	4.86387	6.45633	5.14068	4.89934	6.92626	5.38183	4.96071	6.17159	5.60003	4.87948	6.36392	5.36789	5.2341	6.25819	5.34396	4.81987	6.03798	1809.79	1662.76	2207.15	1757.38	1674.88	2367.8	1839.82	1695.86	2109.81	1914.42	1668.09	2175.56	1835.06	1789.32	2139.41	1826.88	1647.71	2064.13
P00493	Hprt1	Hypoxanthine-guanine phosphoribosyltransferase	24	4.70412	4.57723	7.29813	5.03492	4.69641	7.04523	5.22818	4.6895	8.14923	4.62728	4.41126	6.9734	4.69719	4.75629	7.13487	4.68022	4.42481	6.87173	1752.41	1705.14	2718.74	1875.64	1749.53	2624.53	1947.63	1746.96	3035.8	1723.78	1643.31	2597.77	1749.82	1771.84	2657.92	1743.5	1648.35	2559.9
O55201	Supt5h	Transcription elongation factor SPT5	24	5.77965	6.16238	5.50865	5.61487	5.8541	5.17363	5.13131	5.72435	4.22815	5.45392	5.64889	5.22776	5.89878	6.43001	5.04016	5.61296	5.93587	5.57455	1687.99	1799.77	1608.84	1639.86	1709.73	1511	1498.63	1671.83	1234.86	1592.85	1649.8	1526.8	1722.78	1877.93	1472.01	1639.3	1733.61	1628.09
Q9CRC8	Lrrc40	Leucine-rich repeat-containing protein 40	24	5.38747	5.73977	5.67932	5.40497	5.57243	5.5355	5.16905	5.28747	5.03876	5.51664	5.34627	5.77329	5.8173	5.67262	6.26329	5.76811	5.40531	5.62241	2155.29	2296.24	2272.05	2162.3	2229.29	2214.52	2067.92	2115.29	2015.79	2206.97	2138.81	2309.64	2327.25	2269.37	2505.67	2307.57	2162.43	2249.28
Q64433	Hspe1	10 kDa heat shock protein, mitochondrial	24	3.91354	5.97205	7.05204	3.99871	6.00505	6.10676	3.48286	5.25697	8.20654	3.8631	5.60058	6.93361	4.23166	5.36422	7.33606	4.19378	5.21816	7.2643	2429.02	3706.68	4377	2481.88	3727.16	3790.29	2161.71	3262.85	5093.56	2397.71	3476.12	4303.49	2626.47	3329.41	4553.28	2602.96	3238.76	4508.74
A0A1W2P7A1	Rps12	Isoform of P63323, 40S ribosomal protein S12	24	5.41251	4.89602	4.90897	5.30936	5.65714	5.74754	6.90467	6.84108	7.38902	5.44125	5.31228	5.01651	5.84639	5.18739	5.19661	5.5604	4.96907	4.40379	4668.94	4223.4	4234.57	4579.96	4879.96	4957.94	5956.1	5901.25	6373.92	4693.73	4582.48	4327.34	5043.21	4474.75	4482.69	4796.51	4286.42	3798.79
Q91YT0	Ndufv1	NADH dehydrogenase [ubiquinone] flavoprotein 1, mitochondrial	24	4.03911	5.94312	6.86676	3.69851	5.70707	7.301	3.86474	5.11917	6.49397	4.05907	5.96876	7.65507	4.16924	5.45295	7.1824	4.04251	5.61506	6.82149	1309.08	1926.17	2225.52	1198.69	1849.67	2366.26	1252.57	1659.13	2104.7	1315.55	1934.48	2481.02	1351.26	1767.31	2327.82	1310.18	1819.85	2210.85
Q8R550	Sh3kbp1	SH3 domain-containing kinase-binding protein 1	24	5.19945	5.75028	5.45702	4.47343	5.1253	4.80883	4.6888	4.59935	4.35437	6.53361	5.60952	6.28493	7.08296	6.44494	7.33252	5.59266	5.1111	5.55092	2622.7	2900.55	2752.63	2256.49	2585.3	2425.66	2365.12	2320	2196.43	3295.68	2829.55	3170.24	3572.78	3250.95	3698.66	2821.04	2578.14	2799.99
Q3TDD9	Ppp1r21	Protein phosphatase 1 regulatory subunit 21	24	6.40597	5.2207	6.13923	6.2323	5.17866	5.63537	6.10288	5.24839	5.44534	5.99484	4.98415	5.10442	5.82196	5.2641	4.98502	6.0201	4.93657	5.28003	2824.25	2301.69	2706.65	2747.68	2283.15	2484.5	2690.62	2313.89	2400.72	2642.99	2197.4	2250.42	2566.77	2320.82	2197.78	2654.12	2176.42	2327.84
J3KMM1	Usp19	Isoform of Q3UJD6, Ubiquitin carboxyl-terminal hydrolase 19	24	6.09171	6.22601	4.50561	6.29805	6.35828	4.2575	6.09154	6.17461	4.37742	6.12022	6.35136	4.44375	6.09246	5.80984	4.16723	5.99821	6.1292	4.50702	3228.39	3299.57	2387.82	3337.75	3369.67	2256.33	3228.3	3272.33	2319.88	3243.5	3366	2355.03	3228.79	3079.01	2208.49	3178.84	3248.26	2388.57
Q8BVE3	Atp6v1h	V-type proton ATPase subunit H	24	4.29196	3.72057	8.99619	4.16143	3.55241	9.09126	4.36023	3.50043	8.46706	4.37135	3.76929	8.25768	4.55183	3.56314	8.96922	4.61209	3.5789	8.18496	2272.89	1970.3	4764.1	2203.76	1881.25	4814.45	2309.04	1853.72	4483.89	2314.93	1996.1	4373.01	2410.51	1886.93	4749.82	2442.42	1895.27	4334.5
P35293	Rab18	Ras-related protein Rab-18	24	4.84937	4.52047	7.35978	5.22861	4.68461	7.27226	5.33684	4.81075	7.92544	5.00779	4.36313	6.65724	4.85665	4.34266	6.49576	5.14399	4.28423	6.86042	2201.82	2052.49	3341.65	2374.01	2127.01	3301.92	2423.16	2184.28	3598.49	2273.75	1981.05	3022.67	2205.13	1971.75	2949.35	2335.59	1945.22	3114.92
Q99MQ1	Bicc1	Protein bicaudal C homolog 1	23	8.10747	9.5503	1.48158	7.76355	9.69545	1.16635	7.64073	10.3343	1.0697	6.80525	7.0328	1.20822	5.74681	6.76682	1.13652	6.36371	6.79664	1.33381	4511.58	5314.48	824.458	4320.2	5395.25	649.044	4251.85	5750.75	595.258	3786.93	3913.56	672.342	3197.94	3765.55	632.44	3541.23	3782.14	742.227
F8VQL9	Ncor2	Isoform of Q9WU42, Nuclear receptor corepressor 2	23	7.50068	6.11738	3.6302	7.93116	6.1994	3.27151	7.06271	5.83907	2.78993	7.23596	5.66462	3.82343	7.19384	5.99484	3.47604	6.84546	5.5736	3.85018	1854.62	1512.58	897.601	1961.05	1532.86	808.911	1746.32	1443.77	689.837	1789.16	1400.63	945.379	1778.74	1482.28	859.485	1692.6	1378.13	951.994
Q9CWK8	Snx2	Sorting nexin-2	23	6.39153	5.57831	5.81546	6.33914	5.99099	5.09093	6.272	5.99018	5.71349	5.7264	5.34749	4.65435	5.67816	4.94588	5.15299	5.5985	4.92398	4.79022	2073.46	1809.65	1886.58	2056.46	1943.52	1651.53	2034.68	1943.26	1853.5	1857.69	1734.76	1509.9	1842.04	1604.48	1671.67	1816.19	1597.38	1553.98
Q60520	Sin3a	Paired amphipathic helix protein Sin3a	23	6.20479	5.86499	5.29567	5.92204	5.63489	5.62453	5.67427	5.50332	4.63384	6.28459	5.85409	4.73825	5.79253	6.13982	4.30208	5.91931	5.63506	4.97592	1496.28	1414.34	1277.05	1428.1	1358.85	1356.35	1368.35	1327.12	1117.45	1515.52	1411.71	1142.63	1396.87	1480.61	1037.44	1427.44	1358.89	1199.94
P70399	Tp53bp1	TP53-binding protein 1	23	6.9393	4.73779	4.66862	7.73939	4.86647	4.67088	6.93074	4.71884	4.50821	6.95676	5.03739	4.73654	6.76689	5.47792	4.38414	6.93754	4.98981	4.93278	1672.94	1142.19	1125.52	1865.82	1173.22	1126.06	1670.87	1137.63	1086.85	1677.15	1214.42	1141.89	1631.37	1320.63	1056.94	1672.51	1202.95	1189.2
Q4FZC9	Syne3	Nesprin-3	23	7.31529	9.27896	1.43608	8.62273	9.39503	1.39936	7.25883	9.78558	1.13229	5.78231	8.04711	1.10199	4.49447	8.25609	1.24338	5.86456	8.20744	1.3785	2930.4	3717.02	575.273	3454.15	3763.52	560.564	2907.79	3919.97	453.579	2316.31	3223.56	441.44	1800.42	3307.28	498.079	2349.26	3287.79	552.208
Q64737	Gart	Trifunctional purine biosynthetic protein adenosine-3	23	5.40069	6.06141	5.13718	5.51852	6.3523	4.8794	5.50779	6.49645	4.86185	5.32148	6.18507	5.15373	5.31597	6.29442	4.96296	5.38792	6.14487	5.01798	2825.94	3171.67	2688.05	2887.59	3323.88	2553.17	2881.98	3399.3	2543.99	2784.49	3236.37	2696.71	2781.61	3293.59	2596.9	2819.26	3215.34	2625.68
P43277	H1-3	Histone H1.3	23	6.25444	7.15324	5.35584	5.85044	6.57208	5.44622	5.47788	6.03465	4.75466	5.75606	5.81971	3.82612	5.67847	6.82756	3.37541	5.69481	5.68253	4.43989	4161.88	4759.97	3563.93	3893.05	4373.25	3624.07	3645.14	4015.63	3163.89	3830.25	3872.6	2546.01	3778.62	4543.26	2246.1	3789.49	3781.32	2954.43
P32921-2	Wars1	Isoform of P32921, Isoform 2 of Tryptophan--tRNA ligase, cytoplasmic	23	4.29131	5.18831	6.83152	4.2452	5.3045	6.53953	4.21398	4.97345	6.54357	4.50461	5.39393	7.46138	4.70117	5.55842	7.73574	4.26368	5.30987	6.93984	2141.04	2588.58	3408.42	2118.04	2646.55	3262.74	2102.46	2481.38	3264.75	2247.46	2691.17	3722.67	2345.53	2773.24	3859.55	2127.25	2649.23	3462.46
Q80XB4	Nrap	Nebulin-related-anchoring protein	23	0.86647	1.31358	2.97368	1.49257	2.20628	5.92747	1.05798	1.43224	4.50468	3.665	6.82744	20.452	3.09694	6.57758	11.8095	3.57023	7.21729	15.0091	257.127	389.809	882.445	442.923	654.719	1758.99	313.957	425.021	1336.77	1087.6	2026.06	6069.18	919.026	1951.91	3504.49	1059.48	2141.75	4453.99
Q9D819	Ppa1	Inorganic pyrophosphatase	23	3.26244	10.2047	5.05501	2.68195	10.2481	4.72596	3.29082	9.03108	5.32451	2.83951	8.34964	5.23895	3.05997	5.01803	5.32474	3.26414	7.3657	5.71474	2237.45	6998.59	3466.83	1839.34	7028.35	3241.16	2256.91	6193.69	3651.65	1947.39	5726.34	3592.98	2098.58	3441.47	3651.81	2238.61	5051.54	3919.28
Q9QZQ8-2	Macroh2a1	Isoform of Q9QZQ8, Isoform 1 of Core histone macro-H2A.1	23	6.07002	4.881	6.96149	6.32201	5.28639	5.95498	6.12971	5.69674	7.23603	5.33692	4.84888	5.16874	5.44935	4.24191	5.15902	5.47038	4.39464	5.3918	2949.51	2371.75	3382.69	3071.96	2568.73	2893.61	2978.51	2768.13	3516.09	2593.29	2356.14	2511.57	2647.92	2061.21	2506.84	2658.14	2135.42	2619.96
O89032	Sh3pxd2a	SH3 and PX domain-containing protein 2A	23	4.34218	8.37549	4.94265	3.95494	8.15299	4.77603	3.83758	7.25746	4.49585	4.7783	8.14997	4.56917	4.62698	6.85075	4.20362	4.49599	7.35027	4.83977	1444.76	2786.76	1644.56	1315.92	2712.73	1589.12	1276.87	2414.76	1495.9	1589.87	2711.72	1520.29	1539.52	2279.44	1398.66	1495.94	2445.64	1610.33
Q9QY06	Myo9b	Unconventional myosin-IXb	23	6.58566	4.97226	5.74161	6.75975	4.7874	5.43086	5.98936	4.67141	5.01499	6.47298	4.36092	5.54176	6.45391	4.75878	5.7087	6.46281	4.65493	5.63192	2466.11	1861.95	2150.05	2531.3	1792.72	2033.68	2242.82	1749.29	1877.95	2423.92	1633.02	2075.21	2416.78	1782.01	2137.72	2420.11	1743.12	2108.97
Q61033	Tmpo	Lamina-associated polypeptide 2, isoforms alpha/zeta	23	6.7522	5.14922	5.8089	7.26473	4.80109	5.38584	6.63088	5.3869	5.88167	5.9079	4.755	4.58827	5.44114	5.50727	4.77874	6.03044	5.06257	4.86723	1263.51	963.548	1086.99	1359.41	898.404	1007.82	1240.8	1008.02	1100.61	1105.52	889.78	858.58	1018.17	1030.55	894.222	1128.45	947.334	910.781
Q5H8C4	Vps13a	Vacuolar protein sorting-associated protein 13A	23	3.92153	7.38701	5.73555	4.10143	6.79959	5.5119	4.19588	6.02169	5.24126	4.61823	7.29586	5.96624	4.43272	5.98667	5.54006	4.69128	6.71729	5.8358	1213.11	2285.15	1774.27	1268.76	2103.43	1705.09	1297.98	1862.79	1621.37	1428.63	2256.95	1845.64	1371.25	1851.96	1713.8	1451.23	2077.97	1805.28
P62334	Psmc6	26S proteasome regulatory subunit 10B	23	5.67097	5.52277	5.5518	5.57866	5.55108	5.60855	5.34008	5.03812	5.02525	5.69928	5.54425	5.61613	5.65766	5.62555	5.48177	5.81925	5.83919	5.82965	2782.08	2709.38	2723.62	2736.8	2723.27	2751.46	2619.75	2471.62	2465.3	2795.97	2719.92	2755.18	2775.55	2759.8	2689.27	2854.83	2864.61	2859.93
Q9WVE8	Pacsin2	Protein kinase C and casein kinase substrate in neurons protein 2	23	5.86293	5.1066	3.28726	5.70419	5.65636	4.58835	8.18562	6.92036	4.11672	6.32651	5.76525	4.7837	6.31139	6.10613	4.96062	6.25936	5.56613	4.49253	1684.52	1467.21	944.484	1638.91	1625.17	1318.31	2351.87	1988.34	1182.8	1817.71	1656.45	1374.44	1813.37	1754.39	1425.27	1798.42	1599.24	1290.78
Q7TQK5	Ccdc93	Coiled-coil domain-containing protein 93	23	5.92148	4.9536	6.52653	5.91127	5.07831	5.8512	5.43358	4.98973	5.59134	5.52301	4.87519	5.82861	5.54021	5.28154	6.12931	5.62935	4.82411	6.11164	3121.03	2610.9	3439.94	3115.65	2676.62	3083.99	2863.88	2629.94	2947.03	2911.02	2569.57	3072.09	2920.08	2783.74	3230.57	2967.06	2542.65	3221.27
A2ANY6	Mdn1	Midasin	23	4.32694	5.59232	6.51692	4.92493	5.57945	6.71726	4.16036	5.10336	6.14583	4.32899	5.60761	7.11026	4.44964	5.69107	6.85371	4.26509	6.07064	6.55563	1364.42	1763.43	2054.99	1552.98	1759.37	2118.16	1311.89	1609.25	1937.97	1365.06	1768.25	2242.08	1403.11	1794.57	2161.19	1344.91	1914.26	2067.19
Q58A65	Spag9	C-Jun-amino-terminal kinase-interacting protein 4	23	6.1616	5.39079	4.59294	6.48428	5.52862	5.02255	7.03836	6.31568	4.85337	6.48139	5.40251	4.3205	6.55111	5.852	4.0451	6.35327	5.21903	4.3869	2481.02	2170.65	1849.39	2610.96	2226.15	2022.37	2834.06	2543.06	1954.25	2609.79	2175.37	1739.69	2637.86	2356.36	1628.8	2558.2	2101.49	1766.43
Q61194	Pik3c2a	Phosphatidylinositol 4-phosphate 3-kinase C2 domain-containing subunit alpha	23	7.39314	4.83116	4.3125	7.87214	4.28506	4.33732	7.24659	4.51597	3.75814	7.89863	4.65459	4.29884	8.08935	4.78724	4.46078	7.94406	4.82671	4.48779	1889.67	1234.83	1102.27	2012.1	1095.25	1108.61	1852.21	1154.27	960.573	2018.87	1189.7	1098.77	2067.62	1223.61	1140.16	2030.48	1233.69	1147.07
A2AWT5	Ubtf	Isoform of P25976, Nucleolar transcription factor 1	23	6.24725	6.75926	4.81565	6.29068	6.36144	4.81286	6.2519	7.0425	4.69469	5.72244	5.75196	3.89763	5.78745	6.11805	3.46853	5.80843	5.86027	4.30901	2304.36	2493.22	1776.3	2320.38	2346.48	1775.27	2306.07	2597.69	1731.68	2110.78	2121.67	1437.68	2134.76	2256.7	1279.4	2142.49	2161.62	1589.42
Q8BH97	Rcn3	Reticulocalbin-3	23	7.03286	4.53121	5.03266	8.54434	5.249	3.57844	6.68455	4.20939	3.74282	8.17436	3.99225	4.06115	9.03357	5.22391	4.56358	7.94493	3.91925	4.48172	2206.52	1421.64	1578.97	2680.74	1646.84	1122.72	2097.24	1320.67	1174.29	2564.66	1252.55	1274.16	2834.23	1638.97	1431.8	2492.68	1229.64	1406.11
Q91YI0	Asl	Argininosuccinate lyase	23	4.80816	4.40982	7.69608	4.78394	3.93963	8.11898	5.04074	4.39687	7.35429	4.75454	3.97674	7.60757	4.59136	4.26854	8.16692	4.56629	3.95948	7.56003	1437.87	1318.74	2301.49	1430.62	1178.14	2427.96	1507.42	1314.87	2199.28	1421.83	1189.23	2275.02	1373.03	1276.5	2442.29	1365.54	1184.07	2260.81
P54729	Nub1	NEDD8 ultimate buster 1	23	6.78099	6.23379	4.16599	6.79371	6.63393	3.93366	6.82892	6.68254	3.86988	6.18328	5.96026	3.61334	5.73745	6.36109	3.48586	6.3748	6.46666	3.89385	2189.57	2012.88	1345.19	2193.68	2142.09	1270.18	2205.05	2157.78	1249.58	1996.57	1924.56	1166.74	1852.62	2053.99	1125.58	2058.42	2088.08	1257.32
P61089	Ube2n	Ubiquitin-conjugating enzyme E2 N	23	5.20564	5.4186	6.4618	5.17843	5.16431	5.91296	4.77152	4.9029	6.11251	5.21661	5.15115	6.57574	5.06905	5.68679	6.18122	5.24847	5.10686	6.63546	2659.98	2768.8	3301.85	2646.07	2638.86	3021.4	2438.15	2505.28	3123.37	2665.58	2632.13	3360.07	2590.18	2905.84	3158.48	2681.86	2609.5	3390.59
Q9CSH3	Dis3	Exosome complex exonuclease RRP44	23	5.0089	6.04692	5.78688	4.77792	5.6827	6.26564	5.04809	5.90794	5.29982	5.33052	6.29919	5.5024	5.3219	5.74099	5.30194	4.99174	5.8368	5.8497	1788.21	2158.79	2065.95	1705.75	2028.76	2236.87	1802.2	2109.17	1892.07	1903.03	2248.85	1964.39	1899.95	2049.57	1892.83	1782.08	2083.78	2088.38
Q91VK1	Bzw2	Basic leucine zipper and W2 domain-containing protein 2	23	5.00599	5.81829	4.64003	5.62147	6.61375	4.77912	6.03051	7.11482	5.72016	5.23303	6.45752	4.1493	5.35144	7.24938	4.04739	5.45837	6.43482	4.2746	2445.88	2842.76	2267.07	2746.6	3231.41	2335.03	2946.45	3476.23	2794.81	2556.8	3155.08	2027.31	2614.66	3541.97	1977.52	2666.9	3143.99	2088.53
Q921F2	Tardbp	TAR DNA-binding protein 43	23	6.45495	5.58505	4.8787	6.1226	5.81345	5.28316	6.74062	6.08034	4.95278	6.23284	5.48675	4.44665	6.23546	5.48979	4.12343	6.0579	5.66485	4.35069	3457.56	2991.6	2613.25	3279.54	3113.95	2829.9	3610.58	3256.91	2652.93	3338.59	2938.95	2381.83	3339.99	2940.58	2208.7	3244.88	3034.35	2330.43
A2A432	Cul4b	Cullin-4B	23	6.76588	5.82854	3.98262	6.57925	5.4387	4.26859	6.97698	5.61407	3.57396	7.12289	5.7206	4.06673	7.39137	5.76104	4.12642	7.27993	5.49547	4.00696	2915.71	2511.77	1716.28	2835.29	2343.77	1839.52	3006.69	2419.35	1540.18	3069.56	2465.26	1752.53	3185.27	2482.68	1778.26	3137.24	2368.24	1726.77
Q9JLJ2	Aldh9a1	4-trimethylaminobutyraldehyde dehydrogenase	23	5.14663	9.21938	3.89372	4.44253	9.10722	4.46401	4.99077	9.4196	4.4075	4.22555	7.71289	3.70483	3.83867	6.06375	4.28366	4.34822	6.99497	3.73609	2365.46	4237.35	1789.61	2041.85	4185.8	2051.72	2293.82	4329.37	2025.75	1942.12	3544.95	1702.79	1764.3	2786.98	1968.83	1998.5	3214.98	1717.15
Q91ZA3	Pcca	Propionyl-CoA carboxylase alpha chain, mitochondrial	23	4.09251	7.74382	6.19195	4.00373	7.75892	5.97819	3.99771	7.05388	6.3462	3.47618	6.94921	6.05033	3.2593	5.21983	5.90597	3.69885	6.26974	6.00368	2137.14	4043.88	3233.48	2090.78	4051.77	3121.86	2087.64	3683.59	3314.04	1815.29	3628.93	3159.53	1702.03	2725.84	3084.14	1931.57	3274.11	3135.17
Q68FL4	Ahcyl2	Putative adenosylhomocysteinase 3	23	5.96531	6.86544	3.91736	5.54508	6.76893	4.54609	6.59912	7.96437	4.40629	5.41484	6.80287	3.85931	5.18795	6.28722	3.76566	5.53078	6.6108	3.96258	3601.35	4144.77	2364.97	3347.65	4086.51	2744.55	3983.99	4808.21	2660.15	3269.02	4107	2329.92	3132.05	3795.69	2273.39	3339.02	3991.04	2392.27
Q99MR6	Srrt	Serrate RNA effector molecule homolog	23	5.83883	5.76993	5.58996	5.66848	5.40218	5.67134	5.31283	4.81084	4.53678	5.95789	5.54354	5.52056	6.09546	5.86051	5.36089	5.9117	5.34083	5.80746	2324.98	2297.54	2225.88	2257.15	2151.11	2258.29	2115.53	1915.64	1806.51	2372.39	2207.4	2198.25	2427.17	2333.61	2134.67	2354	2126.68	2312.49
Q8R0X7	Sgpl1	Sphingosine-1-phosphate lyase 1	23	3.57277	3.39864	9.90201	3.69379	3.36933	9.15901	3.58445	3.16625	9.22493	3.6356	3.28473	9.52779	3.83801	3.44636	10.5923	3.59088	3.4428	9.57038	1989.03	1892.09	5512.64	2056.4	1875.77	5099	1995.54	1762.71	5135.7	2024.01	1828.67	5304.31	2136.7	1918.66	5896.93	1999.11	1916.67	5328.02
O88532	Zfr	Zinc finger RNA-binding protein	23	5.79433	5.66953	5.3592	5.55789	5.84699	6.12777	6.05176	6.27815	5.69426	5.62984	5.50979	5.10556	5.40086	5.39776	4.75427	5.71834	5.13442	4.96929	1918.78	1877.45	1774.68	1840.48	1936.21	2029.19	2004.02	2078.99	1885.64	1864.31	1824.55	1690.69	1788.48	1787.45	1574.36	1893.61	1700.25	1645.57
Q6NZR5	Skiv2l	Superkiller viralicidic activity 2-like (S. cerevisiae)	23	5.7584	4.38425	6.5334	5.57529	4.33526	6.34126	5.89757	4.60649	5.91633	5.69023	4.83844	6.49555	5.9744	4.43177	6.92952	5.73054	4.48712	6.07417	1350.86	1028.5	1532.67	1307.91	1017.01	1487.6	1383.51	1080.64	1387.91	1334.87	1135.05	1523.79	1401.54	1039.65	1625.6	1344.33	1052.64	1424.94
P46664	Adss2	Adenylosuccinate synthetase isozyme 2	23	6.78624	5.78898	4.85185	6.59805	5.78253	4.6057	6.83083	5.8776	4.3065	6.40202	5.31496	4.04653	6.42334	5.96202	3.83291	6.69564	5.29112	4.60318	4293.67	3662.7	3069.77	4174.6	3658.62	2914.04	4321.88	3718.77	2724.73	4050.57	3362.79	2560.25	4064.06	3772.18	2425.09	4236.35	3347.7	2912.44
G3X8Y3	Naa15	Isoform of Q80UM3, N-alpha-acetyltransferase 15, NatA auxiliary subunit	23	5.10722	4.7998	5.90173	5.35937	5.07865	6.12588	5.60046	5.18536	6.27945	5.20968	5.38786	6.12693	5.56821	5.19669	6.06757	5.42805	5.64434	5.93276	1603.41	1506.89	1852.84	1682.56	1594.44	1923.21	1758.26	1627.94	1971.42	1635.57	1691.51	1923.54	1748.13	1631.49	1904.9	1704.13	1772.03	1862.58
Q9QWY8	Asap1	Arf-GAP with SH3 domain, ANK repeat and PH domain-containing protein 1	23	7.66925	5.60829	3.70275	7.91767	5.52191	3.62058	7.4794	5.72201	3.39257	7.87469	5.23549	3.50507	7.20556	5.62081	3.81281	7.52544	5.12054	3.46515	6162.58	4506.51	2975.32	6362.2	4437.1	2909.29	6010.03	4597.89	2726.08	6327.66	4206.95	2816.48	5789.99	4516.57	3063.76	6047.02	4114.58	2784.4
P97333	Nrp1	Neuropilin-1	23	5.9964	7.49962	3.84486	5.43292	7.85719	3.80795	5.85755	7.83284	3.22773	4.94364	8.16046	3.7738	4.67448	7.20082	4.08642	4.74236	6.95915	4.10181	3276.92	4098.41	2101.15	2968.99	4293.81	2080.97	3201.04	4280.5	1763.89	2701.61	4459.54	2062.31	2554.52	3935.11	2233.15	2591.61	3803.04	2241.56
Q8C2Q3	Rbm14	RNA-binding protein 14	23	6.10803	5.57742	6.17513	5.99548	5.5811	5.966	6.39169	5.90844	6.36105	5.30135	5.21306	4.79324	5.53233	5.05062	4.82732	5.35011	5.04112	4.82649	1943.44	1774.61	1964.79	1907.63	1775.79	1898.25	2033.7	1879.94	2023.95	1686.78	1658.68	1525.1	1760.27	1607	1535.95	1702.29	1603.98	1535.68
Q6ZWV3	Rpl10	60S ribosomal protein L10	23	5.61602	5.40963	4.88906	5.81137	5.72463	5.24141	6.40232	6.30697	5.29474	5.85408	5.66596	4.95707	6.22787	5.76455	5.03186	5.75909	5.51468	4.52867	4353.51	4193.51	3789.97	4504.94	4437.7	4063.11	4963.05	4889.13	4104.45	4538.05	4392.22	3842.7	4827.81	4468.65	3900.67	4464.42	4274.95	3510.6
P51855	Gss	Glutathione synthetase	23	5.75347	4.6743	6.29356	5.95045	4.69263	6.2941	5.53879	4.38823	5.84291	5.56184	4.57393	6.82794	5.67176	4.69481	6.11079	5.94938	4.53977	6.64133	2067.32	1679.56	2261.39	2138.1	1686.14	2261.58	1990.18	1576.77	2099.46	1998.46	1643.49	2453.4	2037.96	1686.93	2195.71	2137.72	1631.22	2386.35
Q64105	Spr	Sepiapterin reductase	23	4.20137	4.03948	9.00861	4.1301	4.17001	8.85966	4.40661	4.03464	9.42119	4.2885	3.73898	7.79117	4.00493	3.8758	7.85236	4.09544	3.86877	8.21237	899.684	865.016	1929.11	884.422	892.967	1897.21	943.633	863.98	2017.46	918.341	800.667	1668.4	857.618	829.965	1681.51	876.998	828.46	1758.6
Q8K1R3	Pnpt1	Polyribonucleotide nucleotidyltransferase 1, mitochondrial	23	3.81062	5.0262	7.77862	3.60013	5.0234	8.33065	3.97521	5.13852	8.07196	3.86063	5.25539	7.40105	4.04364	4.7702	7.27971	3.92724	5.29272	7.41411	1833.14	2417.9	3741.98	1731.88	2416.56	4007.54	1912.31	2471.94	3883.1	1857.19	2528.16	3560.35	1945.24	2294.75	3501.98	1889.24	2546.11	3566.63
P60122	Ruvbl1	RuvB-like 1	23	5.80244	5.98685	5.48398	6.11865	6.2196	5.18619	5.76221	6.12159	5.45113	5.30195	5.62447	4.84819	5.44253	5.78385	4.59261	5.65524	5.58866	5.02985	2539.29	2620	2399.93	2677.68	2721.85	2269.61	2521.69	2678.96	2385.55	2320.27	2461.41	2121.69	2381.79	2531.16	2009.84	2474.87	2445.74	2201.19
Q9JII6	Akr1a1	Aldo-keto reductase family 1 member A1	23	6.65538	6.6743	4.49894	6.03835	6.29471	4.66404	6.72007	6.19364	4.1038	6.04928	5.30033	4.31184	6.02028	5.46326	4.84342	6.24826	5.40544	4.51465	2909	2917.27	1966.44	2639.3	2751.36	2038.61	2937.27	2707.18	1793.73	2644.08	2316.72	1884.66	2631.4	2387.94	2117.01	2731.05	2362.66	1973.31
Q01279	Egfr	Epidermal growth factor receptor	23	4.95663	6.98771	4.7215	4.72585	5.46269	4.75122	4.72905	6.74486	4.55353	5.00371	5.58233	5.79523	5.21057	5.82422	7.52204	4.93973	5.9174	6.57173	1328.37	1872.69	1265.35	1266.52	1463.99	1273.32	1267.38	1807.61	1220.34	1340.99	1496.06	1553.11	1396.42	1560.88	2015.89	1323.84	1585.85	1761.21
Q8R3S6	Exoc1	Exocyst complex component 1	23	4.99286	4.27041	5.65631	4.86979	4.76876	7.65312	7.94098	7.03549	8.81498	4.94651	4.407	5.16754	5.08788	4.48005	5.31591	5.0313	4.43495	5.12615	1834.51	1569.06	2078.28	1789.29	1752.17	2811.96	2917.73	2585.03	3238.86	1817.48	1619.25	1898.69	1869.43	1646.09	1953.21	1848.64	1629.52	1883.49
Q9WVJ2	Psmd13	26S proteasome non-ATPase regulatory subunit 13	23	5.42726	5.37843	5.55681	5.26946	5.35321	6.2666	5.44556	5.28004	5.52182	5.54531	5.30188	5.81015	5.66825	5.51264	5.64879	5.81443	5.47961	5.71974	2584.82	2561.56	2646.52	2509.66	2549.55	2984.57	2593.54	2514.7	2629.86	2641.04	2525.1	2767.18	2699.6	2625.48	2690.33	2769.21	2609.75	2724.12
Q9D4H8	Cul2	Cullin-2	23	5.56392	5.64895	5.99676	5.39191	5.57578	6.00236	5.6637	5.56734	5.45295	5.34728	5.53171	5.52256	5.27246	5.25397	5.46269	5.46476	5.5743	5.70662	1923.79	1953.19	2073.44	1864.31	1927.88	2075.38	1958.28	1924.97	1885.41	1848.88	1912.65	1909.48	1823.01	1816.62	1888.78	1889.5	1927.37	1973.12
Q99KE1	Me2	NAD-dependent malic enzyme, mitochondrial	23	4.32066	5.3196	7.19137	4.11781	5.20097	7.32579	4.83144	5.67969	7.82109	4.4406	5.16538	6.72523	4.24097	4.99917	6.68711	4.35938	5.11134	6.46238	1305.92	1607.85	2173.6	1244.61	1571.99	2214.22	1460.31	1716.69	2363.93	1342.17	1561.24	2032.7	1281.84	1511	2021.18	1317.62	1544.9	1953.26
Q8R4H2	Arhgef12	Rho guanine nucleotide exchange factor 12	23	5.79922	4.87135	6.8391	5.61893	4.79069	6.76092	5.57889	4.52823	6.07521	5.63821	4.58375	6.1132	5.46347	4.59652	5.81895	5.73236	4.76122	6.4298	2691.12	2260.54	3173.68	2607.46	2223.12	3137.4	2588.88	2101.32	2819.19	2616.41	2127.08	2836.83	2535.32	2133.01	2700.28	2660.1	2209.44	2983.74
Q8R151	Znfx1	NFX1-type zinc finger-containing protein 1	23	6.03293	6.02165	4.90269	6.07244	5.59237	4.74665	5.88485	5.45037	4.12721	6.08466	6.07366	4.80666	6.10252	6.1477	4.71699	6.1029	6.42915	4.70462	1275.51	1273.13	1036.55	1283.86	1182.37	1003.56	1244.2	1152.34	872.596	1286.45	1284.12	1016.25	1290.22	1299.78	997.288	1290.31	1359.28	994.673
Q9R112	Sqor	Sulfide:quinone oxidoreductase, mitochondrial	23	5.05824	9.23534	4.45539	4.29241	8.8614	4.43132	4.57344	7.89753	3.9638	4.59619	7.54785	4.43366	4.50559	5.25886	5.44109	4.49836	6.57837	4.37115	1394.4	2545.89	1228.21	1183.28	2442.8	1221.57	1260.75	2177.1	1092.69	1267.02	2080.7	1222.22	1242.05	1449.7	1499.94	1240.05	1813.45	1204.98
P16460	Ass1	Argininosuccinate synthase	23	2.84849	4.2452	7.56569	2.34981	3.78649	6.75506	2.13294	3.20058	5.82079	3.44779	6.2026	9.33034	3.95498	7.42403	12.0904	3.42084	6.79949	8.62451	1850.9	2758.46	4916.06	1526.87	2460.4	4389.32	1385.95	2079.68	3782.25	2240.31	4030.35	6062.7	2569.88	4824.01	7856.14	2222.8	4418.19	5604.06
Q1XH17	Trim72	Tripartite motif-containing protein 72	23	0.955108	0.960773	2.02298	2.23608	2.26037	4.88795	1.56774	1.48926	3.59544	7.30586	7.26102	15.2469	6.08229	8.35419	9.00818	6.98568	7.68594	12.0943	378.988	381.236	802.72	887.28	896.919	1939.55	622.08	590.942	1426.68	2898.97	2881.18	6049.98	2413.46	3314.95	3574.46	2771.93	3049.79	4799.02
P23927	Cryab	Alpha-crystallin B chain	23	0.736619	0.635692	15.7736	0.975037	0.573706	15.2121	0.856845	0.431975	16.4765	1.86488	2.50366	13.9012	1.64979	2.96472	7.56794	1.8237	2.95204	13.0999	245.274	211.668	5252.18	324.66	191.028	5065.21	285.306	143.836	5486.23	620.952	833.649	4628.73	549.334	987.169	2519.91	607.24	982.946	4361.9
Q3UHU8	Gtf2i	Isoform of Q9ESZ8, General transcription factor II-I	23	6.98443	6.13441	4.05503	6.9223	6.46851	4.40688	7.30385	6.56253	3.85899	6.56366	5.95154	3.34218	6.39023	6.09016	3.06518	6.4621	5.86593	3.57208	3714.93	3262.81	2156.82	3681.88	3440.52	2343.96	3884.82	3490.52	2052.55	3491.13	3165.55	1777.66	3398.88	3239.28	1630.33	3437.11	3120.01	1899.95
Q3UH60	Dip2b	Disco-interacting protein 2 homolog B	23	7.39937	7.31448	2.94563	7.38551	7.51363	2.89174	7.28188	8.11236	2.5673	6.42078	6.13778	2.7422	6.00425	6.67659	3.07959	6.25765	6.4572	2.81205	1473.75	1456.84	586.689	1470.99	1496.51	575.956	1450.35	1615.76	511.335	1278.84	1222.48	546.171	1195.88	1329.79	613.37	1246.35	1286.1	560.083
Q9DBG5	Plin3	Perilipin-3	23	6.42173	7.6225	3.86757	6.32146	7.53398	3.3719	6.0244	7.59168	3.7246	5.84195	6.59584	3.39448	5.62794	7.1155	3.2822	5.87977	6.3476	3.43489	2164.71	2569.48	1303.73	2130.91	2539.64	1136.64	2030.77	2559.09	1255.53	1969.27	2223.4	1144.25	1897.13	2398.57	1106.4	1982.02	2139.72	1157.87
O35129	Phb2	Prohibitin-2	23	4.04739	6.33912	7.1372	3.75916	6.06308	7.19583	3.62757	5.17928	6.34661	3.80148	5.82043	7.34327	3.96628	5.44251	6.95007	4.09472	5.48927	7.39673	2134.45	3343.03	3763.91	1982.45	3197.46	3794.83	1913.06	2731.37	3346.98	2004.77	3069.49	3872.59	2091.68	2870.19	3665.23	2159.41	2894.85	3900.78
G5E870	Trip12	E3 ubiquitin-protein ligase TRIP12	23	5.79675	5.73439	4.88933	6.2158	5.79712	5.02104	5.90151	5.53728	5.14451	6.038	5.87942	4.83926	6.10222	5.84205	4.5477	5.82517	5.96807	4.92042	2156.38	2133.19	1818.82	2312.27	2156.52	1867.82	2195.35	2059.86	1913.75	2246.13	2187.14	1800.2	2270.02	2173.24	1691.74	2166.96	2220.12	1830.39
E9PZF0	Gm20390	Gm20390 readthrough, Nucleoside diphosphate kinase	23	4.97964	5.66851	6.31267	5.08896	5.94637	5.85713	4.70823	5.50313	6.07177	5.02358	5.66049	6.03817	4.97495	6.23623	6.22753	4.77783	5.20438	5.72042	3115.45	3546.44	3949.44	3183.85	3720.28	3664.44	2945.65	3442.96	3798.73	3142.94	3541.42	3777.7	3112.51	3901.62	3896.18	2989.19	3256.05	3578.91
Q9DBL1	Acadsb	Short/branched chain specific acyl-CoA dehydrogenase, mitochondrial	23	4.85194	6.45081	6.47917	5.11361	6.387	5.98088	5.50401	6.42272	6.66319	4.59993	5.6568	5.6528	4.59361	3.98666	6.04029	4.68934	5.20605	5.72119	1649.86	2193.54	2203.18	1738.83	2171.84	2033.74	1871.59	2183.98	2265.76	1564.16	1923.54	1922.18	1562.01	1355.63	2053.94	1594.56	1770.27	1945.44
Q8R0H9	Gga1	ADP-ribosylation factor-binding protein GGA1	23	6.03578	6.73996	4.47605	5.17385	6.42898	4.77414	5.30934	6.24458	3.85007	6.16385	6.6827	4.68836	5.60199	6.36136	4.21627	5.95288	6.32906	4.97078	1577.86	1761.95	1170.12	1352.54	1680.65	1248.05	1387.96	1632.45	1006.48	1611.34	1746.98	1225.62	1464.46	1662.98	1102.21	1556.19	1654.53	1299.45
Q91VC3	Eif4a3	Eukaryotic initiation factor 4A-III	23	5.79183	5.89595	5.54529	5.88774	5.68544	5.71032	5.17647	5.23832	5.03685	5.70892	5.91032	5.27506	5.67619	5.6758	5.08594	5.42968	6.15678	5.11311	2427.85	2471.5	2324.51	2468.06	2383.26	2393.69	2169.91	2195.83	2111.38	2393.1	2477.52	2211.23	2379.38	2379.22	2131.95	2276.05	2580.84	2143.35
Q922Q8	Lrrc59	Leucine-rich repeat-containing protein 59	23	5.6792	5.22478	5.6756	5.62788	5.16583	5.70215	5.83453	5.19514	6.59539	5.71396	5.01174	5.84812	5.83322	4.82358	6.36436	5.70767	4.53416	5.46272	3893.54	3582.01	3891.08	3858.36	3541.59	3909.28	4000.03	3561.68	4521.67	3917.37	3435.95	4009.35	3999.14	3306.95	4363.27	3913.06	3108.53	3745.13
Q99K01	Pdxdc1	Pyridoxal-dependent decarboxylase domain-containing protein 1	23	6.77902	4.91947	5.17431	6.27118	4.74096	4.88893	6.26867	4.74061	4.44412	6.97007	4.81422	5.29513	7.23091	4.69394	5.89334	6.95861	4.80002	5.11649	3163.59	2295.79	2414.72	2926.6	2212.48	2281.53	2925.42	2212.32	2073.96	3252.75	2246.67	2471.1	3374.48	2190.54	2750.27	3247.4	2240.05	2387.73
Q9R0X4	Acot9	Acyl-coenzyme A thioesterase 9, mitochondrial	23	5.32908	5.63196	6.00418	5.45072	5.44683	5.69758	5.10325	5.06924	5.03452	5.06411	5.28837	6.23136	5.20261	5.68739	6.26049	5.46719	5.40946	6.62164	2864.67	3027.48	3227.57	2930.06	2927.97	3062.76	2743.28	2724.99	2706.32	2722.23	2842.78	3349.69	2796.69	3057.28	3365.35	2938.91	2907.88	3559.49
Q9QYC0	Add1	Alpha-adducin	23	4.74351	6.98836	6.52022	4.72225	7.009	5.78921	4.50752	6.43669	5.85412	4.37565	6.71857	4.77373	4.50369	6.56997	4.4064	4.50191	6.27509	5.3041	1337.12	1969.91	1837.94	1331.13	1975.73	1631.88	1270.6	1814.4	1650.18	1233.43	1893.86	1345.64	1269.52	1851.97	1242.09	1269.02	1768.85	1495.14
A0A0R4J0M9	Vcpip1	Isoform of Q8CDG3, Ubiquitinyl hydrolase 1	23	5.65418	5.44958	5.58439	5.84354	5.42873	5.28476	5.96651	5.5471	4.90638	5.92063	5.67925	5.3066	5.78306	5.52909	5.15654	5.9051	5.6203	5.43426	1240.77	1195.87	1225.45	1282.32	1191.3	1159.7	1309.31	1217.27	1076.67	1299.24	1246.27	1164.49	1269.05	1213.32	1131.56	1295.83	1233.33	1192.51
D3Z7P3	Gls	Glutaminase kidney isoform, mitochondrial	23	6.85661	3.6599	5.75558	7.07718	3.85779	5.55265	7.36302	4.44756	6.18157	6.63168	4.17256	5.9309	6.09543	4.18691	6.14095	6.35242	4.37205	5.36522	2405.95	1284.24	2019.6	2483.35	1353.68	1948.4	2583.65	1560.63	2169.08	2327.02	1464.13	2081.12	2138.86	1469.17	2154.83	2229.03	1534.13	1882.63
P62702	Rps4x	40S ribosomal protein S4, X isoform	23	5.82088	5.51545	5.26864	5.60005	5.51749	5.3308	5.28204	5.43291	5.10692	5.84732	5.70402	5.59566	6.05019	5.74487	5.90438	5.77151	5.4599	5.047	2133.87	2021.9	1931.42	2052.91	2022.65	1954.21	1936.33	1991.64	1872.14	2143.56	2091.03	2051.3	2217.93	2106	2164.48	2115.77	2001.54	1850.17
Q8BGH2	Samm50	Sorting and assembly machinery component 50 homolog	23	4.2585	6.16916	6.21524	4.1807	6.04648	6.99983	4.69047	6.73054	7.41849	4.09663	5.94727	6.27307	4.08487	5.01389	6.04794	4.18429	5.53918	6.10345	1372.37	1988.11	2002.96	1347.3	1948.57	2255.81	1511.58	2169.02	2390.73	1320.2	1916.6	2021.6	1316.41	1615.8	1949.04	1348.45	1785.09	1966.93
P10852	Slc3a2	4F2 cell-surface antigen heavy chain	23	3.16614	3.02076	9.95547	3.30925	2.72093	9.50354	2.82714	2.15744	7.50028	4.51807	3.49576	10.2459	5.54716	4.49836	9.23126	4.14512	3.46842	10.689	2064.97	1970.16	6493.02	2158.31	1774.61	6198.27	1843.88	1407.09	4891.73	2946.71	2279.96	6682.44	3617.9	2933.86	6020.68	2703.47	2262.12	6971.45
P47757	Capzb	F-actin-capping protein subunit beta	23	5.69977	5.30916	5.61457	6.38658	5.84203	6.0142	6.07695	6.408	7.30644	5.56498	5.17121	5.40889	5.32725	4.6456	5.46213	5.00347	4.32892	4.42986	2215.05	2063.25	2181.94	2481.95	2270.33	2337.24	2361.63	2490.28	2839.43	2162.66	2009.64	2102.01	2070.28	1805.37	2122.69	1944.45	1682.3	1721.54
Q9D379	Ephx1	Epoxide hydrolase 1	23	4.67049	4.80534	5.74363	4.19608	4.66343	5.04809	3.70536	4.61305	4.9733	6.59961	6.54406	5.79456	6.54744	8.25044	6.15379	5.88745	6.12388	5.67998	2284.08	2350.03	2808.89	2052.07	2280.63	2468.74	1812.09	2255.99	2432.17	3227.51	3200.34	2833.8	3201.99	4034.84	3009.48	2879.23	2994.86	2777.77
P14576	Srp54	Signal recognition particle 54 kDa protein	23	5.61072	5.19825	6.39296	5.58141	5.41638	5.66728	5.21358	5.20821	5.79669	5.69683	5.32322	5.79644	5.73505	5.12679	5.81734	5.59831	5.00264	5.81791	2530.8	2344.75	2883.64	2517.58	2443.14	2556.31	2351.66	2349.24	2614.68	2569.64	2401.12	2614.57	2586.88	2312.52	2624	2525.2	2256.51	2624.26
Q9QZL0	Ripk3	Receptor-interacting serine/threonine-protein kinase 3	23	4.58745	2.69876	8.72642	4.6096	2.39321	8.52321	4.24643	2.1919	8.73949	5.08128	2.8814	9.61946	5.44917	3.35007	10.7047	4.81495	3.12992	8.25261	1724.07	1014.26	3279.59	1732.4	899.426	3203.22	1595.91	823.767	3284.5	1909.66	1082.9	3615.22	2047.92	1259.03	4023.07	1809.57	1176.3	3101.52
Q60716	P4ha2	Prolyl 4-hydroxylase subunit alpha-2	23	7.41981	3.22732	4.02684	7.37981	3.31256	3.76353	7.0541	2.59841	2.86079	9.03208	3.84528	4.85196	11.8453	4.62552	6.4454	8.87777	3.976	4.85757	4188.69	1821.91	2273.26	4166.11	1870.03	2124.61	3982.23	1466.87	1615	5098.86	2170.77	2739.07	6686.98	2611.23	3638.61	5011.74	2244.56	2742.23
P63276	Rps17	40S ribosomal protein S17	23	5.73055	5.43064	5.48546	5.90111	5.58315	5.15338	5.66793	5.56904	5.81886	5.60928	5.54262	5.40564	5.82226	5.60287	5.68252	5.51014	5.31456	5.16997	2895.07	2743.56	2771.25	2981.24	2820.61	2603.49	2863.44	2813.48	2939.69	2833.81	2800.13	2730.93	2941.41	2830.57	2870.81	2783.72	2684.92	2611.87
P55096	Abcd3	ATP-binding cassette sub-family D member 3	23	4.72861	7.15411	5.26713	5.04548	7.18881	4.83226	4.53448	6.47651	4.7056	4.77858	6.76975	5.18751	5.14382	6.06972	5.62715	4.89966	6.69127	4.89956	1189.88	1800.21	1325.39	1269.61	1808.95	1215.96	1141.03	1629.71	1184.09	1202.45	1703.5	1305.35	1294.36	1527.35	1415.98	1232.92	1683.75	1232.89
P62751	Rpl23a	60S ribosomal protein L23a	23	5.95446	5.69422	4.95767	5.83203	5.72553	4.93761	5.45358	5.29615	4.51426	6.22425	5.78318	5.03403	6.43248	6.27705	5.43602	6.20957	5.3143	4.9236	3809.86	3643.35	3172.08	3731.52	3663.38	3159.25	3489.38	3388.65	2888.37	3982.48	3700.27	3220.94	4115.71	4016.26	3478.15	3973.08	3400.26	3150.28
Q3UJB0	Sf3b2	Splicing factor 3b, subunit 2	23	6.34166	5.70025	5.63979	6.30738	5.59397	5.3984	5.74045	4.99395	4.60654	6.10092	5.41584	5.14008	6.25398	5.67906	4.89186	6.08589	5.04185	5.06816	2954.38	2655.57	2627.4	2938.41	2606.06	2514.95	2674.3	2326.53	2146.04	2842.23	2523.07	2394.6	2913.53	2645.7	2278.97	2835.23	2348.84	2361.1
Q05186	Rcn1	Reticulocalbin-1	23	6.65484	5.37407	4.20716	7.73913	5.73268	3.40929	6.03344	4.18255	2.77189	7.60877	4.8838	4.44225	8.77366	5.95481	5.24256	7.72859	4.90873	4.35179	1959.8	1582.62	1238.97	2279.11	1688.23	1004.01	1776.8	1231.73	816.299	2240.72	1438.24	1308.21	2583.77	1753.64	1543.89	2276.01	1445.58	1281.57
Q9QYJ0	Dnaja2	DnaJ homolog subfamily A member 2	23	4.61516	5.02329	5.94985	4.71066	4.97902	6.15295	4.49739	4.68447	5.32485	5.10591	5.48959	7.56674	5.16529	5.68295	7.46403	5.06969	5.44056	7.07759	3264.63	3553.34	4208.76	3332.19	3522.01	4352.42	3181.32	3313.66	3766.65	3611.78	3883.18	5352.5	3653.78	4019.96	5279.84	3586.15	3848.5	5006.48
P51655	Gpc4	Glypican-4	23	6.34032	4.74687	4.02949	6.55059	4.87664	3.57469	5.75352	4.12185	3.47415	8.14401	5.1857	5.39928	8.21685	6.18751	6.5533	7.21877	4.89521	4.73127	2880.33	2156.44	1830.55	2975.85	2215.4	1623.94	2613.75	1872.51	1578.26	3699.73	2355.8	2452.83	3732.82	2810.91	2977.09	3279.4	2223.84	2149.36
P99027	Rplp2	60S acidic ribosomal protein P2	23	5.02394	4.84001	4.76833	7.04642	6.10745	3.75967	5.50577	6.50133	8.36093	6.24604	5.76867	4.8665	5.98828	5.44731	4.76533	5.77774	4.85321	4.37308	1093.51	1053.47	1037.87	1533.72	1329.35	818.328	1198.38	1415.08	1819.84	1359.51	1255.61	1059.24	1303.41	1185.66	1037.22	1257.58	1056.35	951.842
Q8VE47	Uba5	Ubiquitin-like modifier-activating enzyme 5	22	5.955	5.5693	5.44311	5.51004	5.8096	5.36274	5.54909	5.39247	4.49134	5.62114	5.17877	5.64406	5.92674	5.22508	5.78006	6.43941	5.2915	5.81057	1797.99	1681.54	1643.44	1663.64	1754.09	1619.17	1675.43	1628.15	1356.07	1697.19	1563.62	1704.11	1789.46	1577.61	1745.17	1944.25	1597.66	1754.38
A0A0G2JFH2	Map4	Isoform of P27546, Microtubule-associated protein (Fragment)	22	1.15672	1.77089	2.31665	2.09674	3.43378	4.57525	1.46619	2.46967	2.97976	5.00864	10.121	13.354	3.53758	10.8432	8.08773	4.54368	11.12	11.1185	228.45	349.748	457.536	414.104	678.168	903.607	289.57	487.756	588.5	989.201	1998.89	2637.4	698.669	2141.51	1597.32	897.371	2196.19	2195.89
P55264	Adk	Adenosine kinase	22	6.7794	4.09052	6.32771	6.88704	4.39136	6.4891	7.71431	5.10766	7.05937	5.57298	3.50527	5.72502	5.17143	3.70374	6.3544	5.78901	3.74173	5.58995	3425.15	2066.65	3196.95	3479.53	2218.64	3278.49	3897.5	2580.54	3566.6	2815.64	1770.96	2892.45	2612.76	1871.24	3210.43	2924.78	1890.43	2824.21
Q60931	Vdac3	Voltage-dependent anion-selective channel protein 3	22	4.67613	5.44415	7.05544	4.48429	4.8835	6.72003	4.46636	5.52239	6.49544	4.47593	5.14152	6.8298	4.53627	5.44463	6.68474	4.49421	5.28635	7.35883	1624.91	1891.78	2451.69	1558.24	1696.97	2335.14	1552.01	1918.97	2257.1	1555.34	1786.62	2373.28	1576.3	1891.95	2322.88	1561.69	1836.95	2557.11
Q6P9J9	Ano6	Anoctamin-6	22	5.08412	4.97641	6.87091	5.59769	5.33231	6.33082	5.06532	5.54648	6.27518	4.98405	4.50634	6.34866	5.08091	5.55738	6.72827	5.16601	4.47597	6.07316	2420.47	2369.19	3271.13	2664.97	2538.63	3014.01	2411.52	2640.59	2987.52	2372.83	2145.4	3022.5	2418.94	2645.78	3203.23	2459.46	2130.94	2891.33
O35945	Aldh1a7	Aldehyde dehydrogenase, cytosolic 1	22	3.05801	7.02975	7.79342	2.87094	7.68123	7.0807	3.02872	7.50762	8.4237	2.23937	7.25589	4.87559	2.52679	8.26767	4.18318	2.8522	7.74369	5.58152	991.437	2279.11	2526.7	930.785	2490.33	2295.63	981.941	2434.04	2731.04	726.025	2352.43	1580.71	819.208	2680.46	1356.23	924.711	2510.58	1809.58
Q8BZF8	Pgm5	Phosphoglucomutase-like protein 5	22	2.69671	7.54802	1.69397	2.98242	9.00723	2.22958	2.73177	9.9309	1.65654	5.08233	10.7886	4.03446	4.48767	12.3955	2.9567	5.03489	10.9656	3.77703	1303.83	3649.4	819.017	1441.97	4354.91	1077.98	1320.79	4801.5	800.922	2457.26	5216.2	1950.62	2169.74	5993.12	1429.54	2434.32	5301.78	1826.16
Q6A068	Cdc5l	Cell division cycle 5-like protein	22	5.88934	5.84057	5.98423	5.84644	5.66102	5.91227	5.72165	5.45096	5.48025	5.60384	5.35633	5.16235	5.79162	5.48417	4.98483	5.62442	4.99555	5.21015	2533.1	2512.12	2573.91	2514.65	2434.89	2542.96	2460.97	2344.55	2357.14	2410.3	2303.84	2220.41	2491.07	2358.83	2144.06	2419.15	2148.66	2240.97
Q6AW69	Cgnl1	Cingulin-like protein 1	22	2.9742	4.3547	9.77585	2.98099	3.97214	9.40981	2.78572	3.82527	9.47585	2.91475	4.80088	10.4268	2.73362	3.84857	10.3405	2.84228	4.16386	8.37422	981.599	1437.22	3226.41	983.844	1310.96	3105.6	919.396	1262.49	3127.4	961.981	1584.48	3441.24	902.199	1270.18	3412.77	938.064	1374.23	2763.82
P43276	H1-5	Histone H1.5	22	6.28679	6.71351	5.78038	6.12816	6.83653	5.54751	6.1428	6.6397	6.41919	5.15532	5.50587	3.70076	5.16107	5.99709	3.31315	5.06744	5.24703	4.35771	2710.06	2894.01	2491.76	2641.68	2947.04	2391.38	2647.99	2862.19	2767.14	2222.32	2373.43	1595.3	2224.8	2585.18	1428.21	2184.43	2261.85	1878.49
Q9WTM5	Ruvbl2	RuvB-like 2	22	5.85968	5.71958	5.42878	5.96933	5.80475	5.42496	5.54992	5.53857	5.24135	5.5749	5.60897	5.28807	5.6918	5.60863	5.18915	5.65442	5.63473	5.21239	2620.08	2557.43	2427.41	2669.1	2595.51	2425.7	2481.57	2476.49	2343.6	2492.74	2507.97	2364.49	2545.01	2507.82	2320.26	2528.29	2519.49	2330.65
Q8BI06	Cemip	Cell migration-inducing and hyaluronan-binding protein	22	2.90394	1.41912	7.32959	3.45458	1.04362	6.8628	2.95435	1.07106	7.11064	4.45947	3.24754	11.4362	6.70736	3.11663	16.6998	4.50104	6.87639	8.80586	849.939	415.356	2145.26	1011.1	305.451	2008.64	864.693	313.482	2081.18	1305.22	950.505	3347.21	1963.14	912.192	4887.78	1317.39	2012.62	2577.34
Q8BWQ6	Vps35l	VPS35 endosomal protein-sorting factor-like	22	5.43189	4.7586	5.64841	5.23731	4.77792	7.02808	6.4189	6.07232	6.59781	5.39855	4.74632	5.53209	5.2697	5.00133	5.95218	5.5656	4.82352	5.73947	1764.16	1545.49	1834.48	1700.96	1551.77	2282.56	2084.72	1972.16	2142.82	1753.33	1541.5	1796.7	1711.48	1624.32	1933.14	1807.59	1566.57	1864.05
G3X928	Sec23ip	Isoform of Q6NZC7, SEC23-interacting protein	22	6.45664	4.50775	5.40156	6.44581	4.36351	4.84204	6.40698	4.32851	4.89814	6.795	4.94809	5.68938	7.05639	5.05677	5.91635	6.55367	4.82044	5.51299	2027.89	1415.79	1696.51	2024.49	1370.49	1520.78	2012.3	1359.49	1538.4	2134.16	1554.09	1786.91	2216.26	1588.22	1858.2	2058.37	1514	1731.51
Q8VCW8	Acsf2	Medium-chain acyl-CoA ligase ACSF2, mitochondrial	22	4.48761	4.52639	7.74895	4.36548	4.42063	8.40077	5.00821	4.73545	8.03133	4.51429	3.98046	8.00324	4.29466	3.63438	8.07053	4.51356	3.68454	7.57954	1815.68	1831.37	3135.22	1766.27	1788.58	3398.95	2026.32	1915.96	3249.47	1826.48	1610.49	3238.11	1737.62	1470.47	3265.33	1826.18	1490.76	3066.68
Q8R5H1	Usp15	Ubiquitin carboxyl-terminal hydrolase 15	22	5.56075	5.82039	4.49334	5.83478	6.02602	4.8994	6.29848	6.71071	5.30323	5.77371	6.01463	4.57543	5.60986	6.11826	4.6339	5.69161	5.83233	4.80316	4004.91	4191.9	3236.15	4202.27	4340	3528.6	4536.23	4833.13	3819.44	4158.29	4331.8	3295.27	4040.28	4406.43	3337.38	4099.16	4200.5	3459.28
Q9EPL8	Ipo7	Importin-7	22	4.30603	4.69255	4.87378	4.20287	5.04088	6.22217	5.34885	5.92587	5.74678	5.53261	5.90239	6.64623	5.70831	5.8404	6.94498	5.46417	5.74573	5.85539	1195.77	1303.1	1353.43	1167.12	1399.83	1727.87	1485.35	1645.59	1595.86	1536.38	1639.07	1845.63	1585.17	1621.85	1928.59	1517.38	1595.56	1626.02
Q8BFR5	Tufm	Elongation factor Tu, mitochondrial	22	4.15257	6.39483	7.0218	3.71029	6.17813	7.08053	3.97158	5.62956	7.03315	3.69848	5.97754	7.00008	3.6719	5.03739	6.68646	3.9381	5.77748	7.04014	1235.83	1903.14	2089.73	1104.21	1838.65	2107.21	1181.97	1675.39	2093.11	1100.69	1778.96	2083.27	1092.78	1499.16	1989.94	1172.01	1719.42	2095.19
F7AC58	Piezo1	Isoform of E2JF22, Piezo-type mechanosensitive ion channel component	22	5.37863	4.74517	5.71546	5.2693	4.24433	6.09895	4.83997	3.79873	4.32528	5.39429	4.5371	8.10755	5.92998	5.54137	8.62765	5.73889	4.56717	7.14017	1165.71	1028.42	1238.72	1142.02	919.877	1321.83	1048.97	823.301	937.422	1169.11	983.329	1757.16	1285.21	1200.99	1869.88	1243.79	989.846	1547.49
P53811	Pitpnb	Phosphatidylinositol transfer protein beta isoform	22	5.52685	5.26135	5.676	5.24848	5.35889	5.92941	5.89082	5.38126	5.65056	6.02414	5.65006	5.86089	5.72355	4.83031	6.06899	5.46272	5.10118	5.35455	3055.65	2908.86	3138.11	2901.75	2962.79	3278.21	3256.88	2975.16	3124.04	3330.59	3123.77	3240.33	3164.4	2670.55	3355.38	3020.19	2820.31	2960.39
P53810	Pitpna	Phosphatidylinositol transfer protein alpha isoform	22	6.16366	6.02799	5.14048	6.085	5.77338	4.76853	7.0314	6.68955	6.98511	5.31223	5.13621	4.58687	5.31347	5.65669	4.41017	5.46143	4.86596	4.59188	3003.1	2937	2504.58	2964.77	2812.94	2323.35	3425.89	3259.33	3403.33	2588.26	2502.5	2234.84	2588.86	2756.09	2148.75	2660.95	2370.83	2237.28
Q9CW46	Raver1	Ribonucleoprotein PTB-binding 1	22	6.72227	5.19745	4.46767	6.34008	5.8061	5.26958	8.02995	6.16293	5.36291	6.80854	5.40982	3.64169	6.75509	5.14486	3.33722	6.34809	5.25821	3.93753	1422.28	1099.66	945.256	1341.42	1228.44	1114.92	1698.96	1303.94	1134.67	1440.53	1144.59	770.499	1429.22	1088.54	706.08	1343.11	1112.52	833.092
Q99ME9	Gtpbp4	GTP-binding protein 4	22	4.69014	5.49563	7.40101	5.12346	5.37821	6.43528	4.14388	5.33748	6.48315	4.26765	5.29267	6.7317	4.47943	5.35726	6.91625	4.21113	5.76345	6.49221	1001.62	1173.64	1580.55	1094.16	1148.56	1374.31	884.963	1139.87	1384.54	911.395	1130.3	1437.62	956.623	1144.09	1477.03	899.326	1230.84	1386.47
P46467	Vps4b	Vacuolar protein sorting-associated protein 4B	22	6.48962	5.47621	5.27737	6.65326	6.24376	5.11287	6.87077	6.45693	6.01015	5.40914	5.22392	4.22182	5.67906	5.20177	4.86009	5.44614	5.10058	4.26655	3326.3	2806.86	2704.95	3410.17	3200.28	2620.63	3521.65	3309.54	3080.54	2772.49	2677.55	2163.92	2910.84	2666.2	2491.07	2791.45	2614.33	2186.84
A2AJ15	Man1b1	Endoplasmic reticulum mannosyl-oligosaccharide 1,2-alpha-mannosidase	22	6.52535	4.98725	5.28992	6.82046	5.00194	4.72509	6.29379	4.87413	5.29123	6.33383	4.85296	5.02149	6.48754	5.13787	5.52903	6.57009	4.98768	5.27033	2674.87	2044.37	2168.44	2795.84	2050.4	1936.91	2579.95	1998	2168.98	2596.36	1989.33	2058.41	2659.37	2106.12	2266.46	2693.21	2044.55	2160.41
Q80U87	Usp8	Ubiquitin carboxyl-terminal hydrolase 8	22	6.32107	4.59989	5.66926	6.71967	4.99095	5.39318	6.68028	4.63746	5.45036	6.174	4.58613	5.18666	6.86963	4.97631	5.90156	6.19415	4.52723	5.12222	1203.02	875.445	1078.97	1278.88	949.871	1026.42	1271.38	882.594	1037.31	1175.03	872.826	987.117	1307.42	947.084	1123.18	1178.86	861.616	974.854
Q8CG70	P3h3	Prolyl 3-hydroxylase 3	22	8.5196	4.82153	3.17634	8.65818	5.08569	3.33155	9.62682	5.48591	3.16522	8.60622	4.74706	2.68023	8.85656	4.71155	2.81521	8.09064	4.66786	2.95383	3034.15	1717.13	1131.21	3083.5	1811.21	1186.49	3428.47	1953.74	1127.26	3065	1690.61	954.529	3154.15	1677.96	1002.6	2881.38	1662.4	1051.97
P26645	Marcks	Myristoylated alanine-rich C-kinase substrate	22	3.08358	4.49838	11.3986	2.76492	4.00188	8.87129	2.53311	3.13487	11.795	4.03737	3.9194	8.56114	3.59191	4.84238	7.49142	3.39895	3.45889	8.61693	1631.73	2380.4	6031.77	1463.11	2117.67	4694.4	1340.44	1658.87	6241.53	2136.45	2074.02	4530.28	1900.73	2562.43	3964.22	1798.62	1830.34	4559.81
Q61699	Hsph1	Heat shock protein 105 kDa	22	6.64182	3.40806	4.38928	6.34433	3.62136	5.14836	7.74568	4.59653	4.98528	6.09737	4.27443	6.55433	5.87861	4.59021	9.10902	6.2995	4.44714	5.86869	2489.55	1277.44	1645.23	2378.04	1357.39	1929.76	2903.31	1722.92	1868.63	2285.48	1602.18	2456.76	2203.48	1720.55	3414.33	2361.24	1666.92	2199.76
Q9WV92-3	Epb41l3	Isoform of Q9WV92, Isoform 3 of Band 4.1-like protein 3	22	4.59327	2.48457	8.06042	4.66724	2.39088	8.66218	4.8816	2.72301	8.62013	5.12635	2.66807	8.49728	6.3905	3.86786	10.1167	5.20906	2.83188	8.209	1898.92	1027.15	3332.28	1929.5	988.423	3581.06	2018.12	1125.73	3563.68	2119.3	1103.02	3512.89	2641.92	1599.02	4182.37	2153.5	1170.74	3393.71
Q8R3B1	Plcd1	1-phosphatidylinositol 4,5-bisphosphate phosphodiesterase delta-1	22	8.56976	6.7923	3.46342	8.06838	6.94628	3.74806	8.08014	7.47664	3.30709	6.5732	5.07652	3.07673	5.87258	4.71488	2.95303	6.93308	4.97513	3.37278	4054.66	3213.68	1638.67	3817.44	3286.54	1773.34	3823.01	3537.47	1564.7	3110.02	2401.89	1455.71	2778.53	2230.78	1397.19	3280.29	2353.91	1595.78
B7ZNY3	Pard3	Isoform of Q99NH2, Pard3 protein	22	5.3278	5.69977	6.09947	5.67368	5.46205	6.0237	5.33902	5.39565	5.53564	5.70769	5.67178	5.43563	5.08274	5.5237	5.29032	5.32321	5.37336	6.03478	449.085	480.438	514.13	478.24	460.401	507.743	450.031	454.804	466.604	481.106	478.079	458.174	428.428	465.598	445.926	448.698	452.926	508.677
B2RXQ2	Ppfia1	Ppfia1 protein	22	6.00442	4.63043	6.01357	5.70163	4.29241	6.5929	5.20986	3.95342	5.02735	6.21957	4.65222	6.46172	6.32273	5.33289	6.15007	6.12718	4.48911	6.81851	1353.27	1043.6	1355.33	1285.03	967.418	1485.9	1174.19	891.018	1133.06	1401.76	1048.51	1456.33	1425.01	1201.92	1386.09	1380.94	1011.75	1536.75
Q8C878	Uba3	NEDD8-activating enzyme E1 catalytic subunit	22	5.54931	5.02657	5.00607	5.58094	5.7795	6.28866	7.6348	6.96073	7.19437	5.31419	4.79462	4.79876	5.18071	4.89025	4.755	5.60239	4.85398	4.78914	1622.81	1469.94	1463.94	1632.06	1690.12	1839.02	2232.68	2035.55	2103.88	1554.05	1402.11	1403.32	1515.02	1430.07	1390.52	1638.33	1419.47	1400.51
E9Q3Y4	Lrba	Isoform of Q9ESE1, Lipopolysaccharide-responsive and beige-like anchor protein	22	5.04944	6.13305	5.32084	5.15595	5.79432	4.73521	4.73388	5.53165	3.86925	5.212	6.81346	6.13392	5.21586	6.6572	5.89542	5.29086	6.95903	5.49867	813.932	988.602	857.68	831.101	934.002	763.281	763.066	891.662	623.695	840.137	1098.28	988.744	840.759	1073.09	950.298	852.848	1121.74	886.346
Q9DBZ1-2	Ikbip	Isoform of Q9DBZ1, Isoform 2 of Inhibitor of nuclear factor kappa-B kinase-interacting protein	22	4.84715	2.50316	8.99516	5.03728	2.63367	7.67992	4.82901	2.28949	8.27178	4.936	2.63754	8.97377	5.34453	2.98978	10.9993	5.2973	2.8175	8.91771	2244.64	1159.17	4165.52	2332.68	1219.61	3556.45	2236.24	1060.23	3830.53	2285.79	1221.41	4155.61	2474.97	1384.52	5093.59	2453.1	1304.74	4129.66
P23780	Glb1	Beta-galactosidase	22	6.5435	6.35	3.67861	6.65613	6.74182	3.52143	6.90586	7.02625	3.58239	6.73419	6.43087	3.63071	6.30693	5.85625	3.65205	6.66793	5.8981	3.81699	3342.71	3243.86	1879.19	3400.24	3444.01	1798.9	3527.81	3589.31	1830.04	3440.12	3285.17	1854.73	3221.85	2991.63	1865.63	3406.27	3013	1949.88
Q9CQF9	Pcyox1	Prenylcysteine oxidase	22	5.049	6.03621	5.94601	5.00049	6.50624	5.62439	4.78105	6.0348	5.66994	5.08726	5.64054	5.72947	4.76282	5.44652	6.28066	4.93342	5.51479	5.95638	1532.68	1832.36	1804.98	1517.96	1975.04	1707.35	1451.34	1831.93	1721.17	1544.3	1712.25	1739.25	1445.81	1653.35	1906.57	1497.6	1674.08	1808.13
P46978	Stt3a	Dolichyl-diphosphooligosaccharide--protein glycosyltransferase subunit STT3A	22	6.68356	4.21691	6.08718	5.93415	4.62626	6.17471	5.9764	4.42477	5.34166	5.65172	4.18609	6.0592	6.39688	4.77551	6.44863	6.3259	4.25646	6.434	2543.91	1605.05	2316.92	2258.67	1760.86	2350.23	2274.75	1684.17	2033.16	2151.17	1593.32	2306.27	2434.79	1817.67	2454.49	2407.78	1620.1	2448.92
Q99LG2	Tnpo2	Transportin-2	22	5.23026	4.90107	4.14697	4.37711	4.3899	8.28804	5.982	5.04569	4.21671	6.32489	5.2224	6.24686	6.59563	5.12684	5.99962	6.619	5.44851	5.83849	1747.93	1637.92	1385.9	1462.81	1467.08	2769.82	1999.16	1686.25	1409.21	2113.75	1745.3	2087.67	2204.23	1713.36	2005.05	2212.04	1820.87	1951.2
Q8BUK6	Hook3	Protein Hook homolog 3	22	6.86778	6.03975	4.211	6.61627	5.9927	4.27367	6.38686	5.66242	3.82451	6.65659	5.70221	4.46182	6.40549	6.02326	4.59446	6.48666	5.54242	4.2521	3334.11	2932.12	2044.32	3212.01	2909.28	2074.74	3100.64	2748.94	1856.69	3231.58	2768.26	2166.08	3109.68	2924.12	2230.48	3149.09	2690.68	2064.27
Q9R0Q3	Tmed2	Transmembrane emp24 domain-containing protein 2	22	6.14227	4.71816	5.80711	6.12141	5.19272	4.50523	6.75312	5.83679	5.12405	5.95076	4.99218	5.29275	6.05962	5.20169	5.58105	6.18071	4.84296	5.69741	2992.61	2298.76	2829.32	2982.45	2529.97	2195.02	3290.23	2843.78	2496.52	2899.31	2432.27	2578.71	2952.34	2534.35	2719.18	3011.34	2359.57	2775.87
Q60823	Akt2	RAC-beta serine/threonine-protein kinase	22	5.85636	7.11904	2.66681	5.56609	7.40666	3.47772	7.09913	8.30659	3.1563	5.91583	7.84261	3.37526	5.54848	6.57563	2.90618	6.15654	7.37716	3.64761	1270.97	1545.01	578.763	1207.98	1607.43	754.75	1540.69	1802.73	684.995	1283.88	1702.04	732.514	1204.16	1427.07	630.712	1336.12	1601.03	791.62
Q80U72	Scrib	Protein scribble homolog	22	6.45788	6.07066	4.20272	6.35642	6.01681	4.31828	6.23584	5.92338	3.83608	6.31914	5.91552	4.41141	6.21325	6.55268	4.4042	6.42393	5.87961	4.46219	1866.49	1754.58	1214.69	1837.17	1739.01	1248.09	1802.32	1712.01	1108.73	1826.39	1709.74	1275.01	1795.79	1893.89	1272.93	1856.68	1699.36	1289.69
Q9CRT8	Xpot	Exportin-T	22	6.29011	5.52535	4.54821	6.14992	5.39472	4.38872	6.08781	5.45346	3.91424	6.58018	5.80121	4.57743	7.26899	5.93539	4.60482	6.486	6.48584	4.5076	2832.86	2488.44	2048.37	2769.72	2429.6	1976.54	2741.75	2456.06	1762.84	2963.5	2612.68	2061.52	3273.71	2673.1	2073.86	2921.08	2921.01	2030.07
P97384	Anxa11	Annexin A11	22	6.94595	5.44536	3.53592	7.0107	5.44435	3.74316	6.79413	5.61851	3.3395	6.90788	5.6216	4.74109	6.40104	6.13646	4.82662	6.9261	5.75343	4.80818	4360.51	3418.47	2219.77	4401.16	3417.84	2349.87	4265.2	3527.18	2096.46	4336.61	3529.11	2976.35	4018.43	3852.33	3030.05	4348.05	3611.87	3018.46
P55288	Cdh11	Cadherin-11	22	4.7577	4.86401	7.25979	4.47122	4.51771	6.37533	4.11868	4.4807	6.14768	5.69103	5.25957	6.21578	5.79374	7.23635	5.70682	5.08634	5.46878	6.54877	2626.48	2685.17	4007.75	2468.33	2493.99	3519.49	2273.71	2473.56	3393.81	3141.72	2903.53	3431.41	3198.42	3994.81	3150.44	2807.9	3019.03	3615.24
P08752	Gnai2	Guanine nucleotide-binding protein G(i) subunit alpha-2	22	6.77277	6.28674	3.77665	6.30742	6.05236	3.85231	7.17724	6.63966	3.49843	6.63884	5.85917	3.78466	6.55291	6.34043	4.1765	6.73909	5.77615	3.76867	2278.35	2114.85	1270.46	2121.8	2036	1295.91	2414.41	2233.57	1176.87	2233.29	1971.02	1273.15	2204.39	2132.91	1404.97	2267.02	1943.09	1267.78
P42227	Stat3	Signal transducer and activator of transcription 3	22	8.45012	5.76845	2.8363	8.52418	5.09606	2.88735	8.48866	5.51951	2.4	8.75552	5.37786	2.76181	8.0519	5.52371	2.75992	8.34503	5.41327	3.04037	3182.85	2172.76	1068.33	3210.74	1919.5	1087.56	3197.36	2079	903.99	3297.88	2025.64	1040.27	3032.85	2080.58	1039.56	3143.26	2038.98	1145.2
Q8C129	Lnpep	Leucyl-cystinyl aminopeptidase	22	6.28587	7.28313	3.2114	6.08974	7.0877	3.39442	6.10914	6.99647	3.28039	5.58753	6.92246	4.34236	5.31501	6.50462	4.73747	5.95651	6.6364	4.25937	1135.8	1316	580.27	1100.36	1280.68	613.341	1103.87	1264.2	592.737	1009.62	1250.83	784.624	960.373	1175.33	856.018	1076.29	1199.14	769.629
Q9WUB3	Pygm	Glycogen phosphorylase, muscle form	22	1.60968	2.9769	1.80127	2.55353	4.9	3.37264	1.70808	3.40502	2.33966	5.70795	13.4392	7.52392	3.98528	13.622	5.40676	5.13714	13.7408	6.77025	290.256	536.792	324.804	460.451	883.564	608.151	308	613.989	421.886	1029.25	2423.35	1356.71	718.622	2456.3	974.942	926.325	2477.72	1220.8
O54734	Ddost	Dolichyl-diphosphooligosaccharide--protein glycosyltransferase 48 kDa subunit	22	5.96247	4.63806	5.93157	5.75498	5.0737	5.49048	5.85962	4.64006	5.14977	5.81699	4.9827	5.96944	6.18651	5.14817	6.21208	6.1083	4.94007	6.13506	2157.57	1678.32	2146.39	2082.49	1835.96	1986.78	2120.35	1679.04	1863.49	2104.93	1803.03	2160.09	2238.64	1862.91	2247.9	2210.34	1787.61	2220.02
Q8BKX6	Smg1	Serine/threonine-protein kinase SMG1	22	5.67648	5.18052	6.29002	5.71881	5.23324	6.21361	5.01649	4.67491	5.51956	5.53969	5.17297	6.22536	5.70931	5.07975	5.7882	5.66173	5.14859	6.15077	1106.01	1009.37	1225.55	1114.25	1019.65	1210.66	977.414	910.86	1075.43	1079.35	1007.9	1212.95	1112.4	989.74	1127.77	1103.13	1003.15	1198.42
B1ASP2	Jak1	Isoform of P52332, Tyrosine-protein kinase	22	5.92305	4.99703	5.30426	5.90491	4.78051	5.07073	5.60066	4.86751	5.00994	6.60672	5.01917	5.70263	6.70473	6.01922	5.95544	6.09002	5.16762	5.27583	2148.45	1812.56	1924	2141.87	1734.02	1839.29	2031.51	1765.58	1817.24	2396.44	1820.59	2068.5	2431.99	2183.33	2160.2	2209.01	1874.44	1913.69
P51125	Cast	Calpastatin	22	8.0441	6.90871	3.14712	7.36316	6.67878	2.65864	6.78519	5.92519	2.60979	7.31299	6.51832	2.92855	7.40667	5.98975	3.5257	7.20909	5.87246	3.1158	3472.81	2982.64	1358.68	3178.83	2883.37	1147.79	2929.31	2558.03	1126.7	3157.17	2814.1	1264.32	3197.62	2585.9	1522.12	3112.32	2535.27	1345.16
Q9EQH2	Erap1	Endoplasmic reticulum aminopeptidase 1	22	7.03971	6.29991	3.04866	6.43585	6.65022	2.51552	5.96062	5.85245	2.05668	7.67272	7.23678	3.06874	7.29506	7.62245	3.90461	7.09419	6.79749	3.44834	4366.2	3907.36	1890.85	3991.67	4124.63	1560.19	3696.92	3629.83	1275.6	4758.81	4488.43	1903.3	4524.58	4727.63	2421.73	4399.99	4215.97	2138.74
Q8CC35	Synpo	Synaptopodin	22	9.60186	4.53202	2.60956	10.3329	4.55929	2.91799	9.61198	5.08729	2.30376	8.78163	4.21872	2.93002	8.21946	5.29913	2.69815	8.62163	4.6872	2.98741	2207.31	1041.84	599.896	2375.37	1048.11	670.799	2209.64	1169.49	529.597	2018.76	969.817	673.564	1889.52	1218.19	620.261	1981.97	1077.51	686.757
Q99L04	Dhrs1	Dehydrogenase/reductase SDR family member 1	22	4.08585	2.74516	9.6748	4.01354	2.8964	9.63871	5.53774	4.20028	15.2168	3.27079	2.60064	7.63217	3.56312	2.70709	8.31161	3.55892	2.71119	7.63519	2081.8	1398.7	4929.45	2044.96	1475.76	4911.07	2821.56	2140.1	7753.2	1666.52	1325.06	3888.71	1815.46	1379.3	4234.89	1813.32	1381.39	3890.24
E9PYG6	Rasa1	RAS p21 protein activator 1	22	6.78024	6.00201	4.22906	6.71975	5.92638	4.242	6.72867	5.99084	3.95384	6.49728	5.50185	4.3843	6.26173	5.56033	4.4422	6.51245	5.59481	4.67227	1301.38	1152.01	811.714	1289.77	1137.49	814.197	1291.48	1149.86	758.888	1247.07	1056.01	841.51	1201.86	1067.23	852.623	1249.98	1073.85	896.781
O08532	Cacna2d1	Voltage-dependent calcium channel subunit alpha-2/delta-1	22	7.73319	4.29521	3.10313	7.35682	4.42436	3.32525	6.79659	4.30666	2.61294	8.6409	6.27752	4.8687	7.48978	5.83336	4.25316	7.9864	6.06231	4.63371	2526.41	1403.23	1013.78	2403.45	1445.43	1086.35	2220.42	1406.97	853.639	2822.96	2050.85	1590.59	2446.89	1905.74	1389.49	2609.13	1980.54	1513.82
A2AGH6	Med12	Mediator of RNA polymerase II transcription subunit 12	22	4.98268	6.16473	5.50426	5.11799	6.13764	5.79917	5.40957	6.42178	5.69678	5.16745	6.08615	5.3048	5.44297	6.00597	4.68641	4.93045	5.90437	5.23684	1224.04	1514.42	1352.17	1257.28	1507.77	1424.62	1328.91	1577.57	1399.47	1269.43	1495.12	1303.17	1337.11	1475.42	1151.26	1211.21	1450.46	1286.48
Q8CCJ3	Ufl1	E3 UFM1-protein ligase 1	22	6.10941	4.85622	4.70894	6.25286	5.08248	5.5655	7.48995	5.81466	5.28581	6.52059	5.24422	4.60654	6.48455	4.95875	4.68813	6.54621	5.15982	4.62537	3366.48	2675.93	2594.78	3445.53	2800.61	3066.77	4127.21	3204.06	2912.65	3593.05	2889.74	2538.35	3573.2	2732.43	2583.31	3607.17	2843.23	2548.73
Q8BTS4	Nup54	Nuclear pore complex protein Nup54	22	5.83205	5.42175	6.39015	6.30452	5.77845	5.49644	6.18395	5.72284	6.83649	5.22427	4.88526	5.06033	5.44865	5.12887	4.78794	5.3276	4.85943	5.31101	1475.77	1371.95	1617	1595.33	1462.21	1390.85	1564.82	1448.14	1729.94	1321.98	1236.19	1280.49	1378.76	1297.84	1211.57	1348.13	1229.66	1343.93
Q9WTP7	Ak3	GTP:AMP phosphotransferase AK3, mitochondrial	22	5.39089	6.09094	5.62068	5.18737	5.63505	5.1522	4.90098	5.19929	4.8505	5.6118	5.40021	6.12691	5.38692	5.79684	6.31245	5.63993	5.67165	6.02541	2498.52	2822.97	2605.02	2404.19	2611.68	2387.89	2271.46	2409.72	2248.06	2600.9	2502.84	2839.64	2496.68	2686.66	2925.64	2613.94	2628.64	2792.6
Q8R1Q8	Dync1li1	Cytoplasmic dynein 1 light intermediate chain 1	22	5.74919	5.11718	5.62551	5.54543	5.02342	6.01817	5.25034	4.73108	5.07349	6.06751	5.34058	6.10681	5.76953	5.64638	6.08069	5.78784	5.25787	5.809	2642.94	2352.4	2586.08	2549.26	2309.29	2766.59	2413.61	2174.9	2332.31	2789.27	2455.1	2807.33	2652.29	2595.67	2795.33	2660.71	2417.07	2670.43
Q9QYB5	Add3	Gamma-adducin	22	4.0054	7.43275	6.63463	3.52707	7.2016	6.26356	3.6225	6.74128	6.11759	3.79458	7.72874	5.10695	3.66208	7.26484	4.63967	3.63905	7.04172	5.57598	1343.62	2493.34	2225.61	1183.17	2415.8	2101.13	1215.18	2261.38	2052.17	1272.9	2592.63	1713.14	1228.46	2437.01	1556.39	1220.73	2362.17	1870.48
P70698	Ctps1	CTP synthase 1	22	5.51172	3.56916	5.81712	5.63018	3.87169	6.57103	6.36383	4.6205	6.11928	6.08364	4.22854	6.2327	6.94232	4.80783	6.65813	6.40469	4.46302	6.10463	2084.8	1350.03	2200.31	2129.6	1464.46	2485.48	2407.11	1747.7	2314.6	2301.12	1599.43	2357.5	2625.92	1818.55	2518.42	2422.56	1688.13	2309.06
P10639	Txn	Thioredoxin	22	6.03769	5.37425	5.25586	6.00283	5.56446	5.24509	6.4081	5.63522	6.91794	6.10373	4.77563	4.84333	6.03948	5.20426	4.90058	6.13682	4.61082	4.94392	3685.64	3280.65	3208.38	3664.36	3396.76	3201.8	3911.75	3439.96	4222.98	3725.95	2915.23	2956.56	3686.73	3176.88	2991.51	3746.15	2814.63	3017.96
Q6P9R2	Oxsr1	Serine/threonine-protein kinase OSR1	22	5.12985	5.57283	5.63564	4.68987	5.71947	6.33504	5.37528	5.9067	5.69449	4.95242	5.71516	5.99513	4.98207	5.75298	5.63254	5.14429	5.54192	6.22432	1232.66	1339.11	1354.2	1126.94	1374.35	1522.26	1291.64	1419.33	1368.34	1190.03	1373.31	1440.58	1197.15	1382.4	1353.46	1236.13	1331.68	1495.66
Q9CY58	Serbp1	Plasminogen activator inhibitor 1 RNA-binding protein	22	5.37388	5.14621	6.42894	5.32814	4.95239	6.15185	4.81871	4.50652	6.4786	5.37766	5.16015	6.37167	5.40285	5.4045	6.48205	5.38472	4.91015	6.321	3283.89	3144.77	3928.62	3255.93	3026.32	3759.29	2944.63	2753.86	3958.97	3286.2	3153.28	3893.62	3301.59	3302.6	3961.08	3290.51	3000.51	3862.66
F8VQB6	Myo10	Unconventional myosin-X	22	6.66457	3.7367	4.4515	7.53439	4.2568	4.21766	7.14281	4.42819	3.90171	7.68034	4.86473	5.66403	6.91893	5.34164	5.65231	7.30846	5.11247	5.12279	2236.63	1254.03	1493.92	2528.54	1428.58	1415.44	2397.12	1486.1	1309.41	2577.52	1632.6	1900.84	2321.99	1792.65	1896.91	2452.71	1715.74	1719.2
Q3TVI8	Pbxip1	Pre-B-cell leukemia transcription factor-interacting protein 1	22	5.50994	3.55778	3.97011	5.57873	3.9886	4.28546	5.08041	3.83489	3.51677	7.25241	6.80807	6.69987	6.77657	8.1276	5.0778	6.92502	6.69151	6.31845	2678.44	1729.48	1929.92	2711.88	1938.9	2083.21	2469.64	1864.18	1709.54	3525.48	3309.48	3256.88	3294.16	3950.92	2468.38	3366.33	3252.81	3071.47
Q6ZQ58	Larp1	La-related protein 1	22	5.75608	5.65793	5.33665	5.72408	5.25032	5.23555	5.38397	4.85235	4.43841	6.4206	6.08118	5.59439	6.38441	5.64911	5.43906	6.0296	5.51511	5.25119	1627.33	1599.58	1508.75	1618.28	1484.34	1480.17	1522.13	1371.83	1254.8	1815.2	1719.24	1581.61	1804.96	1597.09	1537.7	1704.66	1559.2	1484.59
Q6PIP5	Nudcd1	NudC domain-containing protein 1	22	5.37295	4.61641	6.39197	5.37727	4.63759	6.46018	5.45932	4.27992	6.01196	5.76992	4.50104	6.52113	6.07217	5.05265	6.17219	5.86126	4.73735	6.70472	848.776	729.264	1009.75	849.459	732.609	1020.53	862.419	676.108	949.722	911.486	711.038	1030.16	959.233	798.177	975.033	925.915	748.369	1059.16
P53995	Anapc1	Anaphase-promoting complex subunit 1	22	5.88129	6.3025	5.073	6.41574	6.47813	4.89146	6.53908	6.59238	4.47967	5.50225	5.87755	4.45489	5.88869	5.25057	4.2525	5.85632	5.93729	4.32667	1518.42	1627.17	1309.74	1656.41	1672.51	1262.87	1688.25	1702.01	1156.55	1420.56	1517.46	1150.16	1520.33	1355.58	1097.9	1511.98	1532.88	1117.05
Q8K3G9	Appl2	DCC-interacting protein 13-beta	22	7.83182	7.52135	2.35415	7.96747	7.75685	2.63394	7.60394	8.41222	2.31815	6.78386	6.13383	2.37037	5.88973	5.99627	2.54957	7.01589	6.20195	2.65867	1836.19	1763.4	551.937	1868	1818.62	617.535	1782.77	1972.27	543.496	1590.5	1438.1	555.741	1380.87	1405.84	597.753	1644.9	1454.06	623.334
Q9JLM8-2	Dclk1	Isoform of Q9JLM8, Isoform 2 of Serine/threonine-protein kinase DCLK1	22	5.49938	3.36973	2.86287	5.71409	3.87942	3.7316	5.26442	3.87958	3.03041	7.41961	6.93541	7.04256	6.67838	8.80533	5.49223	6.9349	7.0477	6.41238	1754	1074.76	913.097	1822.48	1237.32	1190.18	1679.06	1237.37	966.532	2366.45	2212.01	2246.19	2130.04	2808.42	1751.72	2211.85	2247.83	2045.2
O09131	Gsto1	Glutathione S-transferase omega-1	22	3.81487	4.32919	8.26679	3.88669	4.19612	8.48554	4.79239	4.86428	10.4077	3.31324	3.4804	7.42458	3.53728	3.62128	11.4554	3.43321	3.80617	6.88493	1964.55	2229.41	4257.16	2001.53	2160.88	4369.81	2467.94	2504.96	5359.64	1706.22	1792.3	3823.44	1821.6	1864.85	5899.18	1768	1960.06	3545.54
Q80TP3	Ubr5	E3 ubiquitin-protein ligase UBR5	22	5.58748	5.37271	5.30904	6.27677	5.42239	5.32276	6.30842	6.11599	5.46935	5.692	5.67098	4.47761	6.25647	5.34307	4.44123	6.14403	5.85172	4.93799	848.405	815.794	806.127	953.067	823.338	808.209	957.872	928.654	830.468	864.276	861.083	679.882	949.985	811.294	674.357	932.911	888.527	749.786
Q3TW96	Uap1l1	UDP-N-acetylhexosamine pyrophosphorylase-like protein 1	21	6.54867	4.70316	4.23949	6.25915	4.64781	4.48183	6.63129	4.98052	4.24421	7.0404	4.77374	5.0978	7.02319	5.99865	6.73746	6.71152	4.95398	4.92711	3055.8	2194.63	1978.27	2920.7	2168.8	2091.35	3094.35	2324.05	1980.47	3285.25	2227.56	2378.78	3277.22	2799.14	3143.89	3131.79	2311.67	2299.13
O08784	Tcof1	Treacle protein	21	6.88809	5.54921	5.03012	7.1925	5.24457	4.97133	6.84919	5.86405	5.1663	6.21195	4.87318	4.24865	6.53508	5.5039	3.86341	6.36947	4.91585	4.72315	3748.38	3019.78	2737.3	3914.03	2854	2705.31	3727.21	3191.11	2811.41	3380.43	2651.9	2312.04	3556.27	2995.13	2102.4	3466.16	2675.12	2570.25
Q9QXK3	Copg2	Coatomer subunit gamma-2	21	5.29352	4.84318	4.48108	5.78599	5.68658	6.49133	9.20573	8.00211	7.5196	4.89387	5.22728	4.38311	5.01975	4.46743	4.16324	5.26987	5.1602	4.10612	1081.39	989.392	915.419	1181.99	1161.68	1326.09	1880.6	1634.72	1536.15	999.747	1067.86	895.406	1025.46	912.631	850.49	1076.56	1054.15	838.82
F8VPU2	Farp1	FERM, ARHGEF and pleckstrin domain-containing protein 1	21	7.48817	4.81034	5.44534	7.67401	4.90408	4.73757	7.0217	4.81652	4.40486	6.97327	4.00182	4.97332	6.66607	4.51125	4.88094	7.10693	4.41192	5.1719	2493.99	1602.12	1813.61	2555.89	1633.34	1577.88	2338.63	1604.18	1467.07	2322.5	1332.84	1656.4	2220.18	1502.51	1625.63	2367.02	1469.42	1722.54
P17427	Ap2a2	AP-2 complex subunit alpha-2	21	6.97112	5.53884	4.78826	6.73537	5.36275	5.10096	6.73298	5.45615	4.32086	6.67146	5.05318	4.48348	6.89257	5.0901	4.19153	6.89184	4.83803	4.88052	2989.53	2375.3	2053.42	2888.43	2299.78	2187.52	2887.4	2339.84	1852.98	2861.02	2167.03	1922.71	2955.84	2182.86	1797.51	2955.52	2074.76	2092.98
Q8CHT0	Aldh4a1	Delta-1-pyrroline-5-carboxylate dehydrogenase, mitochondrial	21	3.04245	9.29064	7.29457	2.46037	8.52928	7.2416	2.67011	7.45474	7.36793	2.60587	8.0475	5.48226	2.36677	5.3057	4.97647	2.60982	7.26322	5.9907	904.978	2763.51	2169.77	731.84	2537.04	2154.02	794.226	2217.42	2191.59	775.116	2393.73	1630.7	703.998	1578.18	1480.25	776.291	2160.45	1781.93
P67778	Phb	Prohibitin	21	3.75685	6.11641	7.00942	3.80156	6.77427	7.14476	3.58967	6.30805	6.97668	3.59163	5.61207	7.13242	3.66776	5.23467	6.97042	3.82751	5.29225	7.1936	1658.06	2699.44	3093.57	1677.8	2989.79	3153.3	1584.28	2784.02	3079.12	1585.15	2476.86	3147.85	1618.74	2310.29	3076.35	1689.25	2335.71	3174.85
Q14DH7	Acss3	Acyl-CoA synthetase short-chain family member 3, mitochondrial	21	1.99417	6.47887	10.7789	1.51288	5.81593	10.7989	1.64456	4.7652	11.4459	1.94228	5.94195	8.31805	1.85981	3.41831	6.21999	2.32609	5.32325	9.41495	1143.43	3714.91	6180.51	867.468	3334.78	6191.95	942.969	2732.31	6562.94	1113.68	3407.04	4769.47	1066.39	1960.02	3566.47	1333.75	3052.28	5398.42
Q5SRX1	Tom1l2	TOM1-like protein 2	21	6.77881	7.74117	3.58364	6.67559	7.38938	3.20444	6.46677	7.7136	3.08725	6.18414	5.69865	3.99837	5.8264	5.60897	3.96899	6.31275	6.05651	3.70456	1529.36	1746.48	808.504	1506.08	1667.11	722.952	1458.97	1740.26	696.512	1395.2	1285.67	902.07	1314.49	1265.44	895.443	1424.22	1366.41	835.785
P21619	Lmnb2	Lamin-B2	21	5.13041	5.57059	6.55722	5.44447	5.57619	6.36668	5.1583	5.33225	6.71675	5.20789	6.04231	5.83579	4.51964	5.38836	5.24033	4.79637	5.54609	5.57037	1644.77	1785.89	2102.19	1745.45	1787.68	2041.1	1653.71	1709.48	2153.33	1669.61	1937.11	1870.91	1448.96	1727.46	1680.01	1537.68	1778.03	1785.82
Q9CR57	Rpl14	60S ribosomal protein L14	21	5.55155	5.42919	4.88575	5.39136	5.78166	5.43232	6.36462	6.31323	5.11237	5.84406	5.91134	5.06306	6.19731	5.67373	5.18922	5.88896	5.37275	4.59754	3652.67	3572.17	3214.61	3547.28	3804.08	3574.23	4187.64	4153.82	3363.72	3845.13	3889.4	3331.27	4077.55	3733.06	3414.28	3874.67	3535.04	3024.98
Q9DB05	Napa	Alpha-soluble NSF attachment protein	21	4.19113	3.91751	7.98075	4.28059	4.12384	8.35388	4.76184	4.25688	9.59552	4.50873	4.06636	7.52471	4.6437	4.02364	7.90991	4.52196	3.91677	7.42227	1244.18	1162.95	2369.17	1270.74	1224.21	2479.94	1413.6	1263.7	2848.53	1338.46	1207.14	2233.79	1378.53	1194.46	2348.14	1342.39	1162.73	2203.38
E9Q394	Akap13	A-kinase anchor protein 13	21	5.57514	5.03723	5.10771	5.63442	4.93211	5.25706	5.30208	4.79803	4.62502	6.34946	5.4711	6.22781	6.33059	5.85036	5.47841	6.33785	5.49753	6.18809	1641.18	1482.83	1503.58	1658.63	1451.89	1547.55	1560.8	1412.42	1361.49	1869.12	1610.56	1833.31	1863.57	1722.2	1612.71	1865.7	1618.34	1821.62
Q02257	Jup	Junction plakoglobin	21	3.94068	7.44428	4.39754	3.49102	7.26032	2.85463	3.2616	6.7399	3.37217	4.08183	8.45663	3.33123	4.23059	11.5761	3.30899	3.53381	15.0796	3.6391	1415.77	2674.51	1579.91	1254.22	2608.42	1025.58	1171.8	2421.45	1211.52	1466.48	3038.22	1196.81	1519.92	4158.95	1188.82	1269.59	5417.66	1307.42
Q9JIX8	Acin1	Apoptotic chromatin condensation inducer in the nucleus	21	6.62285	6.0835	5.13248	6.24433	5.59851	5.08213	6.0824	5.65836	5.18532	5.87406	5.51943	4.43963	6.31391	5.83182	4.3435	5.8231	5.2216	4.94308	2757.86	2533.27	2137.25	2600.24	2331.31	2116.28	2532.81	2356.23	2159.25	2446.05	2298.38	1848.73	2629.21	2428.46	1808.7	2424.83	2174.36	2058.38
Q6P5B0	Rrp12	RRP12-like protein	21	4.01475	5.06801	6.45876	4.13116	5.18179	7.09591	4.56297	5.46327	7.54172	4.20289	5.75476	7.0005	4.66476	5.39117	6.52655	4.37626	6.09066	6.4741	1139.67	1438.66	1833.46	1172.72	1470.96	2014.33	1295.3	1550.87	2140.88	1193.08	1633.61	1987.24	1324.19	1530.4	1852.7	1242.29	1728.96	1837.81
Q9JLV1	Bag3	BAG family molecular chaperone regulator 3	21	5.2735	4.1156	6.22434	5.90866	4.10108	5.4574	5.22692	3.78976	6.30717	6.50267	4.46634	6.73283	6.4657	5.41681	6.59828	6.49619	4.5585	6.35826	3658.03	2854.83	4317.59	4098.62	2844.76	3785.59	3625.72	2628.81	4375.04	4510.65	3098.13	4670.31	4485.01	3757.44	4576.97	4506.16	3162.06	4410.49
P11531	Dmd	Dystrophin	21	3.11867	4.7219	2.02323	3.89853	5.59259	2.83931	3.14019	5.28085	1.88446	6.29056	10.8106	7.04724	4.75797	11.1637	4.73593	5.7202	11.0047	5.96941	892.423	1351.2	578.958	1115.59	1600.35	812.484	898.581	1511.14	539.25	1800.08	3093.52	2016.61	1361.52	3194.55	1355.21	1636.87	3149.04	1708.18
Q3URD3	Slmap	Sarcolemmal membrane-associated protein	21	5.33528	5.24981	6.24304	5.59845	5.01063	5.80099	5.39404	5.08222	6.00223	5.29659	5.33809	5.93221	5.36414	5.76596	5.78097	5.45282	5.37192	5.98061	1681.75	1654.81	1967.89	1764.7	1579.42	1828.55	1700.27	1601.98	1891.98	1669.55	1682.64	1869.91	1690.85	1817.51	1822.24	1718.8	1693.3	1885.17
Q811D0	Dlg1	Disks large homolog 1	21	5.77185	4.26652	7.52424	5.50141	4.16781	6.90445	5.24286	4.29208	6.88127	5.31262	4.00807	6.75974	5.48378	4.26409	7.29586	5.46057	3.98156	6.88123	1440.86	1065.08	1878.32	1373.35	1040.43	1723.6	1308.81	1071.46	1717.81	1326.22	1000.56	1687.48	1368.95	1064.47	1821.31	1363.15	993.94	1717.8
Q9Z204	Hnrnpc	Heterogeneous nuclear ribonucleoproteins C1/C2	21	5.73767	5.62544	6.32941	5.99847	5.77411	5.64931	5.35658	5.34341	5.83115	5.26737	5.4141	5.22832	5.63612	5.75776	4.9626	5.4979	5.12825	5.46203	2750.24	2696.44	3033.88	2875.25	2767.7	2707.89	2567.57	2561.26	2795.05	2524.81	2595.14	2506.09	2701.56	2759.87	2378.73	2635.31	2458.13	2618.12
P48758	Cbr1	Carbonyl reductase [NADPH] 1	21	5.51643	5.95892	6.36549	5.20476	5.93803	6.30841	5.67507	5.71441	5.96269	4.7614	4.91544	5.68216	4.74409	4.51928	6.15655	5.30675	5.14973	6.12041	1933.71	2088.81	2231.33	1824.45	2081.49	2211.32	1989.31	2003.1	2090.14	1669.04	1723.04	1991.8	1662.97	1584.17	2158.09	1860.2	1805.16	2145.42
P16332	Mmut	Methylmalonyl-CoA mutase, mitochondrial	21	3.83743	8.44912	6.70966	3.37808	7.81293	6.99773	3.57205	6.68543	7.28439	3.26483	7.12166	5.63772	3.24289	4.90937	5.77339	3.24388	6.47866	5.60077	1027.05	2261.33	1795.78	904.114	2091.06	1872.88	956.028	1789.3	1949.6	873.802	1906.05	1508.89	867.93	1313.95	1545.2	868.196	1733.96	1499
P48962	Slc25a4	ADP/ATP translocase 1	21	3.91908	4.54626	8.74361	4.3724	5.23007	9.15809	4.55525	5.48507	9.14527	3.59578	4.94702	6.34227	3.80867	4.40208	5.60369	4.04415	4.85574	7.24551	1508.28	1749.65	3365.03	1682.74	2012.82	3524.54	1753.11	2110.96	3519.61	1383.85	1903.89	2440.86	1465.79	1694.17	2156.61	1556.41	1868.76	2788.48
Q9JHI5	Ivd	Isovaleryl-CoA dehydrogenase, mitochondrial	21	4.30981	9.09344	4.09406	3.75772	8.49157	5.28941	5.19489	9.18079	5.45675	3.80919	7.78115	4.22289	3.43426	5.18038	4.45782	4.09686	7.44191	4.70709	2531.98	5342.33	2405.23	2207.64	4988.73	3107.49	3051.96	5393.65	3205.8	2237.87	4571.37	2480.92	2017.6	3043.44	2618.94	2406.88	4372.07	2765.38
Q3TZZ7	Esyt2	Extended synaptotagmin-2	21	5.70585	5.21717	5.55856	5.57544	5.34177	5.31321	5.33017	5.03464	4.79791	5.72201	5.16363	6.03957	5.93581	6.21404	7.19455	5.40738	4.94782	5.50045	2160.22	1975.21	2104.46	2110.85	2022.38	2011.57	2017.99	1906.1	1816.48	2166.34	1954.94	2286.57	2247.28	2352.62	2723.84	2047.22	1873.23	2082.46
P54775	Psmc4	26S proteasome regulatory subunit 6B	21	5.53629	5.83766	5.61801	5.63122	5.57098	5.79235	5.14811	5.39111	5.34834	5.65208	5.54711	5.76306	5.33597	5.60707	5.40727	5.71727	5.5139	5.58221	2922.42	3081.51	2965.56	2972.53	2940.73	3057.59	2717.51	2845.79	2823.21	2983.55	2928.14	3042.13	2816.68	2959.79	2854.32	3017.96	2910.6	2946.66
Q61235	Sntb2	Beta-2-syntrophin	21	6.39676	7.99339	2.34263	5.38842	8.07569	3.01658	5.98976	7.99369	1.98911	5.96443	8.298	3.02395	5.21648	8.21201	3.09804	6.11502	8.04964	2.83636	2032.4	2539.68	744.308	1712.02	2565.83	958.435	1903.08	2539.78	631.986	1895.03	2636.46	960.778	1657.39	2609.14	984.318	1942.88	2557.55	901.176
Q9Z315	Sart1	U4/U6.U5 tri-snRNP-associated protein 1	21	6.01768	5.39871	5.82242	6.12179	5.58083	5.71292	6.00999	5.75633	5.9923	5.60622	5.278	4.92695	5.61794	5.43595	4.63756	5.60413	5.2607	5.21956	2844.6	2552.01	2752.3	2893.82	2638.1	2700.54	2840.97	2721.06	2832.61	2650.1	2494.95	2329.01	2655.64	2569.61	2192.21	2649.11	2486.77	2467.33
Q569Z6	Thrap3	Thyroid hormone receptor-associated protein 3	21	6.48414	5.9567	5.63522	6.04082	4.95914	5.61767	5.56407	5.25502	5.24664	5.85492	5.08619	5.2255	6.04524	5.8073	4.66127	6.02787	4.87663	5.65567	5827.77	5353.73	5064.79	5429.33	4457.14	5049.02	5000.84	4723.08	4715.55	5262.25	4571.34	4696.54	5433.3	5219.45	4189.43	5417.69	4382.98	5083.17
P54822	Adsl	Adenylosuccinate lyase	21	5.09956	6.50668	5.66371	4.59641	6.32468	5.75243	4.7634	5.96426	4.79724	4.96195	6.08778	5.95375	4.81855	6.06446	5.90054	5.00318	5.90371	5.83772	1531.97	1954.68	1701.45	1380.82	1900.01	1728.1	1430.98	1791.73	1441.15	1490.63	1828.84	1788.58	1447.55	1821.83	1772.59	1503.02	1773.55	1753.72
P28656	Nap1l1	Nucleosome assembly protein 1-like 1	21	6.272	5.17206	4.79791	5.97379	4.81047	4.96196	5.86874	4.86724	3.8323	7.08575	5.01612	5.38503	7.02077	6.24651	5.91179	6.83924	4.95857	4.97978	1961.55	1617.55	1500.54	1868.29	1504.46	1551.84	1835.43	1522.22	1198.54	2216.05	1568.78	1684.15	2195.73	1953.58	1848.9	2138.96	1550.78	1557.41
Q8BP92	Rcn2	Reticulocalbin-2	21	6.36624	3.98074	5.51823	7.58832	4.05604	4.9256	5.60791	3.41713	4.50483	6.56472	3.66572	6.4393	8.08981	5.13254	6.31	7.27658	3.77789	6.77839	2107.61	1317.86	1826.86	2512.19	1342.79	1630.67	1856.56	1131.28	1491.37	2173.32	1213.57	2131.79	2678.21	1699.18	2088.99	2408.98	1250.71	2244.05
Q8R1G6	Pdlim2	PDZ and LIM domain protein 2	21	8.13836	6.79701	1.77845	8.53136	7.37022	1.72162	8.50441	8.05958	1.60842	6.60615	5.95878	1.89262	6.41881	7.11005	2.4492	8.12491	6.84247	2.08757	2253.93	1882.45	492.546	2362.78	2041.2	476.807	2355.31	2232.12	445.455	1829.59	1650.3	524.166	1777.7	1969.14	678.311	2250.21	1895.04	578.156
Q6VVW5	Npr2	Atrial natriuretic peptide receptor 2	21	10.8075	6.675	0.843791	10.4994	6.6871	0.716731	9.89295	7.64246	0.326332	8.01027	5.69786	1.02318	7.04913	6.16939	1.17424	9.04604	6.56511	1.1735	3488.58	2154.65	272.37	3389.16	2158.55	231.356	3193.38	2466.94	105.338	2585.67	1839.23	330.276	2275.42	1991.44	379.039	2920	2119.18	378.797
Q9QYE6	Golga5	Golgin subfamily A member 5	21	7.36182	5.4285	4.27293	7.38275	5.36753	4.10672	6.98013	5.32428	3.71579	7.45974	5.25027	4.23472	7.30634	5.46518	4.1492	7.05161	4.86445	4.27802	1810.16	1334.79	1050.65	1815.31	1319.8	1009.78	1716.31	1309.16	913.658	1834.24	1290.96	1041.26	1796.52	1343.81	1020.23	1733.89	1196.1	1051.9
Q9D281	Fam114a1	Protein Noxp20	21	8.61066	4.88469	2.55264	8.65208	4.94901	2.36636	8.04487	4.97835	1.87861	9.62126	4.96422	2.95814	9.36352	5.76769	3.06907	9.43709	5.00157	2.90017	5475.24	3106.02	1623.14	5501.57	3146.91	1504.69	5115.47	3165.57	1194.55	6117.85	3156.59	1880.99	5953.96	3667.49	1951.52	6000.74	3180.33	1844.12
Q8K268	Abcf3	ATP-binding cassette sub-family F member 3	21	5.56133	6.34233	4.55901	5.39526	5.8591	4.83835	5.60738	6.05516	4.34856	5.44087	6.3617	5.53009	5.53746	5.93481	5.64716	5.79666	6.1323	5.05247	2771.14	3160.3	2271.69	2688.39	2919.51	2410.88	2794.08	3017.2	2166.83	2711.11	3169.95	2755.57	2759.24	2957.24	2813.91	2888.4	3055.64	2517.58
E9QP99	Golga3	Isoform of P55937, Golgin subfamily A member 3	21	5.94579	4.90793	5.55604	5.38806	4.67143	5.35061	5.03951	4.27758	4.30837	6.41777	5.04231	6.71988	6.63228	5.57014	6.33295	6.32698	5.12848	6.38387	1563.72	1290.76	1461.21	1417.04	1228.57	1407.19	1325.37	1124.99	1133.08	1687.85	1326.11	1767.3	1744.26	1464.92	1665.54	1663.97	1348.77	1678.93
Q3UZ39	Lrrfip1	Leucine-rich repeat flightless-interacting protein 1	21	4.77011	3.69347	7.36182	4.98244	3.92381	6.70492	5.07192	3.87318	7.39715	5.21623	3.86459	7.86807	5.54589	4.60539	8.9999	5.03215	3.8478	7.24113	1903.6	1473.94	2937.86	1988.33	1565.87	2675.72	2024.04	1545.66	2951.97	2081.63	1542.24	3139.89	2213.19	1837.86	3591.57	2008.17	1535.53	2889.7
P98203	Arvcf	Armadillo repeat protein deleted in velo-cardio-facial syndrome homolog	21	3.03405	3.17968	13.1593	2.5974	2.90314	15.6067	2.81352	2.938	14.2396	2.72483	2.7139	8.36222	2.41811	2.95042	4.63188	2.58198	2.85589	10.2893	686.468	719.419	2977.36	587.673	656.85	3531.09	636.573	664.736	3221.78	616.505	614.033	1891.99	547.109	667.547	1047.99	584.186	646.158	2328.01
Q7TQI3	Otub1	Ubiquitin thioesterase OTUB1	21	5.73716	4.95943	4.59775	6.40532	5.74534	5.21999	9.09937	7.23407	6.3559	5.67497	4.82413	3.9086	6.20028	4.99303	3.70156	6.06504	5.15856	4.1195	1247.2	1078.13	999.506	1392.45	1248.98	1134.77	1978.11	1572.61	1381.71	1233.68	1048.72	849.691	1347.88	1085.43	804.682	1318.48	1121.42	895.537
Q3TCH7	Cul4a	Cullin-4A	21	6.44173	5.65342	4.54171	6.21271	5.49874	4.77846	5.72021	5.27462	3.79326	6.43843	6.03149	4.62609	6.9246	6.2903	4.53689	6.74017	5.84923	4.64793	3030.85	2659.95	2136.88	2923.09	2587.17	2248.27	2691.37	2481.72	1784.74	3029.29	2837.83	2176.58	3258.04	2959.6	2134.62	3171.26	2752.08	2186.86
Q9CZ44	Nsfl1c	NSFL1 cofactor p47	21	6.25913	6.13698	4.9296	6.21246	5.98879	4.72291	5.81733	5.6129	4.87853	5.95618	5.51928	4.77789	5.69168	5.97162	4.48175	6.25217	5.55417	5.23664	2538.25	2488.72	1999.09	2519.32	2428.62	1915.27	2359.09	2276.19	1978.38	2415.4	2238.22	1937.57	2308.13	2421.66	1817.48	2535.43	2252.37	2123.6
Q60714	Slc27a1	Long-chain fatty acid transport protein 1	21	2.5855	16.1224	2.85135	1.48623	13.7299	2.97883	2.05438	11.3054	2.93842	1.76725	12.8533	2.40542	1.94393	6.32592	2.59402	2.14814	11.3106	2.59907	654.233	4079.6	721.504	376.076	3474.21	753.763	519.839	2860.72	743.536	447.185	3252.4	608.666	491.891	1600.71	656.389	543.565	2862.02	657.668
Q924C1	Xpo5	Exportin-5	21	4.69039	4.73929	6.61891	4.75056	5.14683	6.79242	4.76036	5.42062	6.08705	4.60509	5.65893	6.4482	5.142	5.73634	6.31113	4.94949	5.70491	6.43748	1852.25	1871.56	2613.83	1876.01	2032.5	2682.35	1879.88	2140.62	2403.8	1818.57	2234.73	2546.42	2030.59	2265.3	2492.29	1954.57	2252.89	2542.18
Q5FWI3	Cemip2	Cell surface hyaluronidase	21	4.40297	3.22411	9.63172	4.25494	3.16413	9.06128	3.9278	3.17376	8.52853	4.86118	3.67299	9.22246	4.248	3.69008	7.46505	4.54476	3.53206	9.39419	1920.99	1406.66	4202.27	1856.41	1380.49	3953.39	1713.68	1384.7	3720.95	2120.91	1602.51	4023.71	1853.38	1609.96	3256.96	1982.85	1541.02	4098.64
Q791T5	Mtch1	Mitochondrial carrier homolog 1	21	4.64488	4.79701	7.31969	4.31383	4.56036	7.84258	4.3517	4.48411	5.94574	4.63756	4.51265	7.83081	4.83663	5.16533	7.26063	4.9646	4.52794	8.00394	1719.94	1776.28	2710.39	1597.36	1688.65	2904.01	1611.38	1660.41	2201.64	1717.23	1670.98	2899.65	1790.95	1912.66	2688.53	1838.33	1676.64	2963.76
Q99K41	Emilin1	EMILIN-1	21	8.19877	8.22851	2.23096	6.89346	3.73673	1.02576	4.32891	3.50725	1.60943	3.31405	10.4159	1.67078	3.00027	2.19455	1.87381	3.63238	32.8748	1.26361	1834.45	1841.1	499.169	1542.39	836.081	229.511	968.58	784.737	360.104	741.508	2330.53	373.832	671.3	491.023	419.258	812.733	7355.64	282.729
D3YYU8	Obsl1	Obscurin-like protein 1	21	5.29864	4.98543	1.90545	5.5396	5.90442	2.92582	6.61728	6.62988	2.27035	7.23156	8.30294	3.74427	6.34187	10.1275	3.10007	6.81264	8.84654	3.41569	1323.24	1245.03	475.852	1383.42	1474.53	730.673	1652.55	1655.7	566.98	1805.96	2073.52	935.065	1583.77	2529.18	774.188	1701.34	2209.27	853.01
Q9R190	Mta2	Metastasis-associated protein MTA2	21	6.10848	5.87965	5.33971	5.96911	6.17116	5.44243	5.85571	5.7285	5.03427	5.93982	5.86399	4.69756	5.82459	5.81474	4.17272	5.70158	5.64732	4.80863	1976.9	1902.85	1728.1	1931.8	1997.19	1761.35	1895.1	1853.93	1629.25	1922.32	1897.78	1520.28	1885.03	1881.84	1350.43	1845.22	1827.65	1556.23
Q8CFI7	Polr2b	DNA-directed RNA polymerase II subunit RPB2	21	5.79416	6.28016	5.68515	5.65111	6.53676	5.87292	5.66605	6.66183	5.69866	4.64811	6.10233	4.84849	4.88252	5.75656	4.71672	4.6087	6.10372	4.48603	1581.21	1713.84	1551.46	1542.17	1783.86	1602.71	1546.25	1817.99	1555.15	1268.46	1665.31	1323.14	1332.43	1570.95	1287.18	1257.7	1665.69	1224.23
P35585	Ap1m1	AP-1 complex subunit mu-1	21	6.50978	5.67499	5.48534	6.06474	5.30743	5.45125	5.83326	5.02425	4.39365	6.11377	5.21598	5.30787	6.30058	5.38015	5.02163	6.42997	5.18073	5.30461	1451.46	1265.33	1223.05	1352.23	1183.38	1215.44	1300.62	1120.24	979.636	1363.16	1162.99	1183.48	1404.82	1199.59	1119.65	1433.67	1155.13	1182.75
Q8BFY9	Tnpo1	Transportin-1	21	5.74581	5.28169	4.14194	5.54274	5.44452	5.20921	8.2608	6.9796	5.24819	5.95921	5.43521	4.49281	6.30579	5.55151	4.39948	6.19784	5.49758	4.30607	1216.83	1118.54	877.165	1173.82	1153.02	1103.19	1749.44	1478.12	1111.44	1262.02	1151.05	951.473	1335.42	1175.68	931.707	1312.56	1164.26	911.925
P11352	Gpx1	Glutathione peroxidase 1	21	3.15908	5.50033	7.77614	3.07724	5.86375	9.31369	3.47941	6.24581	9.50259	3.55732	5.18226	6.90757	3.55615	4.94226	5.92288	3.25269	5.09347	7.66738	1648.24	2869.79	4057.19	1605.54	3059.4	4859.4	1815.38	3258.74	4957.96	1856.02	2703.84	3604.01	1855.41	2578.61	3090.26	1697.08	2657.51	4000.44
Q9CZ42	Naxd	ATP-dependent (S)-NAD(P)H-hydrate dehydratase	21	5.27637	4.96553	7.83296	4.97866	4.83917	7.10075	4.79327	4.62852	7.71935	4.6211	4.14242	7.08796	4.20113	4.36854	6.96002	4.75261	4.39958	7.33204	1976.15	1859.73	2933.67	1864.65	1812.4	2659.43	1795.21	1733.51	2891.11	1730.73	1551.45	2654.64	1573.44	1636.14	2606.72	1779.99	1647.77	2746.06
Q3TIX6	Fubp3	Far upstream element (FUSE)-binding protein 3	21	6.27309	4.96489	6.16903	6.77641	4.4029	5.77531	6.12518	4.26589	5.40093	6.17337	4.29943	5.73453	6.32681	4.88031	5.8118	6.40673	4.48917	5.72423	1582.14	1252.2	1555.9	1709.09	1110.46	1456.6	1544.84	1075.91	1362.18	1556.99	1084.37	1446.31	1595.69	1230.87	1465.8	1615.85	1132.22	1443.71
Q6P8X1	Snx6	Sorting nexin-6	21	6.11636	5.47613	5.22158	6.37459	5.86402	5.1816	6.39852	5.74815	5.48655	6.14193	5.21667	4.73718	5.80275	5.42518	4.71893	5.81481	5.28231	4.99275	2335.81	2091.3	1994.09	2434.43	2239.44	1978.83	2443.56	2195.19	2095.29	2345.57	1992.22	1809.1	2216.04	2071.85	1802.13	2220.65	2017.29	1906.71
Q8C0D5	Efl1	Elongation factor-like GTPase 1	21	5.07878	5.00089	6.17343	5.30962	4.74767	6.42951	5.05398	5.02357	6.34953	5.17627	5.08032	6.67871	5.27539	5.20761	6.59267	5.37749	5.14754	6.29701	934.91	920.572	1136.41	977.403	873.959	1183.55	930.345	924.747	1168.83	952.855	935.194	1229.43	971.103	958.625	1213.59	989.898	947.568	1159.16
Q924W7	Dennd2b	DENN domain-containing protein 2B	21	6.88253	6.07083	2.80685	8.07482	6.29976	2.98857	7.59233	6.64235	2.45386	6.85685	6.31357	2.73365	6.92779	7.5897	2.6621	7.25752	6.96826	2.87866	1428.93	1260.41	582.751	1676.47	1307.94	620.479	1576.3	1379.07	509.464	1423.6	1310.81	567.553	1438.33	1575.75	552.697	1506.79	1446.73	597.66
O35857	Timm44	Mitochondrial import inner membrane translocase subunit TIM44	21	4.19141	5.89334	7.43624	4.31239	5.9228	6.83912	4.14411	5.33384	7.24574	3.84166	5.91679	7.01254	3.9784	4.72321	6.78333	4.22986	5.54105	6.6542	1178.28	1656.72	2090.46	1212.29	1665	1922.6	1164.98	1499.44	2036.91	1079.96	1663.31	1971.35	1118.4	1327.78	1906.91	1189.09	1557.69	1870.61
Q9Z1N5	Ddx39b	Spliceosome RNA helicase Ddx39b	21	6.3262	5.75158	5.32985	6.19192	5.90378	5.48257	6.27869	6.66915	6.66833	5.6925	5.96205	4.6713	5.05748	5.20822	4.2703	5.23418	5.02322	4.27868	2658.66	2417.17	2239.93	2602.23	2481.14	2304.12	2638.7	2802.79	2802.45	2392.34	2505.63	1963.17	2125.47	2188.82	1794.65	2199.73	2111.07	1798.17
P27641	Xrcc5	X-ray repair cross-complementing protein 5	21	5.85554	5.49654	6.07274	6.30743	5.77682	6.12116	6.32078	6.30008	6.58252	5.27521	4.86677	4.83841	5.13118	5.15732	4.22521	5.47607	5.03138	5.16485	1599.76	1501.68	1659.1	1723.22	1578.25	1672.33	1726.86	1721.21	1798.37	1441.21	1329.62	1321.87	1401.86	1409	1154.35	1496.08	1374.59	1411.06
O70251	Eef1b	Elongation factor 1-beta	21	5.37312	4.94196	4.72444	5.07984	4.8111	5.03709	4.9452	4.44481	6.07754	6.57212	6.10474	6.53781	6.23085	5.84421	6.2613	6.10907	5.24443	5.66038	3445.54	3169.05	3029.57	3257.47	3085.14	3230.06	3171.13	2850.25	3897.25	4214.4	3914.69	4192.4	3995.56	3747.63	4015.08	3917.47	3363.01	3629.74
Q8CGB3	Uaca	Uveal autoantigen with coiled-coil domains and ankyrin repeats	21	5.80869	4.70126	7.61248	5.71341	4.35788	7.98065	5.66829	4.78241	8.44092	4.91533	3.41608	6.84625	4.79983	3.57621	6.18678	4.97543	3.50968	6.70843	2823.61	2285.29	3700.44	2777.3	2118.37	3879.41	2755.37	2324.74	4103.15	2389.35	1660.56	3327.98	2333.21	1738.4	3007.41	2418.57	1706.06	3260.98
P24547	Impdh2	Inosine-5'-monophosphate dehydrogenase 2	21	6.34629	7.26045	2.87012	6.5842	7.66089	2.93764	6.27884	7.5222	2.70648	6.38329	7.1696	2.73764	6.4377	7.61867	2.56862	6.46589	7.40284	3.04865	3991.48	4566.44	1805.16	4141.12	4818.3	1847.62	3949.06	4731.07	1702.23	4014.76	4509.3	1721.83	4048.98	4791.74	1615.53	4066.71	4656	1917.44
Q9JLI8	Sart3	Squamous cell carcinoma antigen recognized by T-cells 3	21	6.62425	5.8314	5.22975	6.54607	5.28196	5.47711	5.79583	5.17102	4.29195	6.28717	5.29755	4.92056	6.02045	6.11615	4.26609	6.35265	5.19563	5.2944	2507.05	2206.98	1979.28	2477.46	1999.04	2072.9	2193.52	1957.05	1624.36	2379.47	2004.94	1862.26	2278.53	2314.75	1614.57	2404.26	1966.36	2003.75
P07742	Rrm1	Ribonucleoside-diphosphate reductase large subunit	21	4.74426	5.11865	5.11417	5.03848	5.45908	5.2276	5.01928	5.47207	5.7417	5.30507	6.13898	6.47374	5.58805	7.16428	5.3589	4.76486	6.19483	6.07599	1629.03	1757.58	1756.05	1730.06	1874.48	1795	1723.46	1878.94	1971.52	1821.6	2107.94	2222.88	1918.76	2459.99	1840.08	1636.11	2127.11	2086.31
Q8BVY0	Rsl1d1	Ribosomal L1 domain-containing protein 1	21	4.35584	5.33605	6.89371	3.99102	4.95998	7.5825	3.84047	4.49119	5.99805	4.52778	5.25914	7.76737	4.81343	5.34812	7.58231	4.69046	5.17449	7.38808	1272.13	1558.4	2013.32	1165.58	1448.57	2214.48	1121.61	1311.66	1751.74	1322.34	1535.94	2268.47	1405.77	1561.92	2214.42	1369.85	1511.21	2157.7
O08715	Akap1	A-kinase anchor protein 1, mitochondrial	21	3.27969	7.67588	5.80537	3.0399	7.77298	5.88034	3.1748	7.18338	6.14332	3.24853	7.49455	6.18125	3.50445	7.95075	5.72401	3.23406	7.21584	5.4909	1382.33	3235.23	2446.85	1281.26	3276.16	2478.45	1338.12	3027.66	2589.29	1369.19	3158.81	2605.28	1477.06	3351.09	2412.56	1363.09	3041.34	2314.31
Q9R0L6	Pcm1	Pericentriolar material 1 protein	21	5.88847	5.48345	5.52339	6.02841	5.32257	5.17092	5.38984	5.08391	5.377	5.75085	6.12936	5.41315	5.74543	5.86581	5.11841	5.68599	5.59203	5.43101	1454.77	1354.7	1364.57	1489.34	1314.96	1277.49	1331.58	1256	1328.41	1420.77	1514.28	1337.34	1419.43	1449.17	1264.52	1404.74	1381.53	1341.75
Q8CIN4	Pak2	Serine/threonine-protein kinase PAK 2	21	5.93697	4.99853	5.29692	6.29567	4.9272	5.53811	6.39576	5.33993	5.53558	6.14766	5.04535	5.30311	6.18023	5.27557	5.34277	6.08158	5.01031	5.34876	2004.3	1687.48	1788.22	2125.39	1663.4	1869.64	2159.18	1802.74	1868.79	2075.42	1703.29	1790.31	2086.42	1781.01	1803.69	2053.12	1691.46	1805.72
Q9WTP6	Ak2	Adenylate kinase 2, mitochondrial	21	3.28791	7.5766	7.84976	2.74654	6.67968	7.33518	2.84491	5.12418	7.61359	3.14515	6.11936	7.6215	3.5709	4.45751	7.63095	3.27841	5.28295	7.83492	1704.26	3927.27	4068.85	1423.65	3462.35	3802.13	1474.64	2656.07	3946.44	1630.26	3171.92	3950.54	1850.94	2310.51	3955.44	1699.34	2738.38	4061.16
Q9JHJ0	Tmod3	Tropomodulin-3	21	7.32716	5.24876	5.09258	7.31765	5.27622	4.48931	6.78777	5.12695	4.56315	6.73193	4.61624	4.75492	6.70326	5.18966	4.97358	6.85879	4.45573	4.48633	3575.97	2561.62	2485.4	3571.33	2575.02	2190.98	3312.72	2502.17	2227.01	3285.47	2252.92	2320.61	3271.47	2532.78	2427.32	3347.38	2174.59	2189.52
Q8K1N2	Phldb2	Pleckstrin homology-like domain family B member 2	21	6.45418	4.20095	6.47576	6.73764	4.11985	5.59386	6.28585	4.32682	6.00011	6.99063	3.90274	5.32519	7.26052	4.66989	5.68008	6.51447	3.88858	5.57288	1759.42	1145.19	1765.31	1836.7	1123.08	1524.9	1713.54	1179.5	1635.64	1905.66	1063.89	1451.66	1979.23	1273.02	1548.4	1775.86	1060.04	1519.18
P97789	Xrn1	5'-3' exoribonuclease 1	21	6.44652	5.59637	5.08463	6.58058	5.28873	5.01039	6.28028	5.02164	4.5581	6.3852	4.97835	4.94246	6.39123	5.43167	5.18702	6.36285	5.50173	4.95226	1563.28	1357.12	1233.02	1595.79	1282.51	1215.02	1522.96	1217.75	1105.34	1548.41	1207.25	1198.54	1549.87	1317.18	1257.85	1542.99	1334.17	1200.92
P03958	Ada	Adenosine deaminase	21	1.76935	2.97376	13.9878	1.75459	2.91491	12.1545	1.71418	2.40173	11.4149	2.01428	3.1178	11.5137	2.01752	4.23073	8.26442	2.13254	3.23619	12.3872	964.946	1621.79	7628.49	956.897	1589.7	6628.66	934.859	1309.83	6225.34	1098.52	1700.35	6279.18	1100.29	2307.31	4507.15	1163.02	1764.92	6755.57
Q9D6R2	Idh3a	Isocitrate dehydrogenase [NAD] subunit alpha, mitochondrial	21	3.38972	5.842	7.25551	3.07103	5.48707	7.73221	3.40771	4.82375	7.96244	3.49961	6.13487	8.23518	3.40535	4.75479	8.14898	3.49408	5.64615	7.70954	1618.62	2789.61	3464.57	1466.45	2620.13	3692.2	1627.21	2303.39	3802.14	1671.1	2929.46	3932.37	1626.08	2270.46	3891.21	1668.46	2696.09	3681.38
A6H8H2	Dennd4c	DENN domain-containing protein 4C	21	6.20366	5.56899	4.83929	6.47631	5.24759	5.05177	6.45627	5.32705	4.48443	6.68105	5.37564	4.50591	7.09547	5.55454	4.53678	6.70343	5.20803	4.68379	1955.36	1755.32	1525.32	2041.3	1654.01	1592.29	2034.98	1679.06	1413.47	2105.83	1694.37	1420.24	2236.46	1750.76	1429.97	2112.89	1641.54	1476.31
Q9ER72	Cars1	Cysteine--tRNA ligase, cytoplasmic	21	4.8061	4.57225	6.11832	4.84331	4.21866	5.92276	4.50577	3.9021	5.12055	6.10812	4.85575	7.31228	6.68987	5.91124	7.93536	5.71997	4.6485	6.80908	2372.43	2256.99	3020.17	2390.79	2082.45	2923.64	2224.18	1926.19	2527.64	3015.14	2396.93	3609.55	3302.31	2917.95	3917.12	2823.54	2294.63	3361.15
Q9CXY6	Ilf2	Interleukin enhancer-binding factor 2	21	5.64918	5.53998	6.07538	5.6573	5.1912	6.26715	5.59878	5.33067	5.59067	5.42233	5.34685	5.6784	5.47062	5.3282	5.21489	5.53038	5.32801	5.78	2569.72	2520.05	2763.59	2573.42	2361.4	2850.83	2546.8	2424.84	2543.11	2466.53	2432.2	2583.02	2488.5	2423.71	2372.17	2515.68	2423.63	2629.23
P97313	Prkdc	DNA-dependent protein kinase catalytic subunit	21	4.60189	7.14304	4.92912	4.9113	7.42097	5.31614	4.74557	7.87348	5.09578	4.40589	7.37944	4.51599	4.23952	6.90298	4.33205	4.43176	7.42121	4.33387	926.546	1438.18	992.43	988.843	1494.14	1070.35	955.473	1585.25	1025.99	887.082	1485.78	909.249	853.586	1389.85	872.215	892.292	1494.19	872.582
P34884	Mif	Macrophage migration inhibitory factor	21	6.63171	3.79473	5.35767	7.38218	4.12073	5.34459	6.73673	4.04383	6.09718	6.73221	3.87059	5.43307	7.61475	4.39166	5.27075	7.20408	3.99407	5.97947	1916.85	1096.84	1548.6	2133.77	1191.07	1544.82	1947.21	1168.84	1762.35	1945.9	1118.77	1570.4	2201	1269.38	1523.48	2082.29	1154.46	1728.33
P05132	Prkaca	cAMP-dependent protein kinase catalytic subunit alpha	21	5.27496	7.0893	3.29096	5.40032	7.59095	3.20345	5.19677	6.74177	2.88268	6.01846	7.70193	4.20908	6.45372	7.1148	3.78314	6.45993	7.16871	4.41907	2642.64	3551.59	1648.7	2705.44	3802.9	1604.86	2603.47	3377.48	1444.16	3015.12	3858.5	2108.66	3233.18	3564.36	1895.27	3236.29	3591.37	2213.86
Q9Z1K5	Arih1	E3 ubiquitin-protein ligase ARIH1	21	5.337	5.14731	4.87156	5.66074	5.46914	5.46478	6.19778	6.00717	5.27547	5.8826	5.37072	5.66557	5.58605	5.86806	5.58985	6.01564	5.17415	5.4164	1401.65	1351.83	1279.41	1486.68	1436.35	1435.21	1627.72	1577.66	1385.49	1544.94	1410.51	1487.94	1467.06	1541.12	1468.06	1579.88	1358.88	1422.5
Q8C166	Cpne1	Copine-1	21	6.86069	4.51862	5.07361	6.82059	4.65495	5.2571	7.04543	4.47133	4.85426	6.9645	4.58595	4.67975	7.37849	5.15111	5.09351	7.0568	4.60068	4.93261	3245.59	2137.63	2400.17	3226.61	2202.12	2486.98	3332.98	2115.25	2296.41	3294.7	2169.48	2213.85	3490.54	2436.84	2409.59	3338.36	2176.45	2333.47
Q3U186	Rars2	Probable arginine--tRNA ligase, mitochondrial	21	4.10647	6.22142	6.87085	4.12688	6.34687	6.36475	4.24271	5.99227	6.54884	3.95308	6.25523	6.55648	4.32655	5.08434	6.55496	4.09374	6.14761	6.20695	776.261	1176.06	1298.82	780.12	1199.77	1203.15	802.015	1132.74	1237.95	747.265	1182.45	1239.39	817.863	961.111	1239.11	773.855	1162.1	1173.32
Q921I1	Tf	Serotransferrin	21	5.68623	8.32417	3.56601	5.32307	7.92544	4.8058	4.17836	7.60871	2.66377	4.51596	9.34106	4.22785	3.67517	5.36224	4.0853	5.09962	7.07886	6.53238	3657.28	5353.94	2293.59	3423.7	5097.49	3091	2687.44	4893.77	1713.29	2904.58	6007.99	2719.27	2363.8	3448.89	2627.58	3279.98	4552.98	4201.5
Q61578	Fdxr	NADPH:adrenodoxin oxidoreductase, mitochondrial	21	3.50132	5.05281	9.78245	3.36111	4.89017	9.69847	3.51443	4.85101	10.8194	3.40164	4.14485	8.22261	2.99041	3.45311	6.78223	3.14919	4.01841	8.36643	681.759	983.858	1904.79	654.458	952.19	1888.44	684.313	944.564	2106.69	662.35	807.063	1601.06	582.278	672.372	1320.6	613.194	782.444	1629.07
Q9DC69	Ndufa9	NADH dehydrogenase [ubiquinone] 1 alpha subcomplex subunit 9, mitochondrial	21	4.12699	6.02392	6.00546	2.58206	5.41291	7.83592	3.23796	5.53602	6.10422	3.56262	7.50112	8.58704	4.73691	4.07239	6.30882	4.98484	5.23146	8.14935	1820.97	2657.95	2649.81	1139.29	2388.35	3457.47	1428.69	2442.67	2693.38	1571.95	3309.74	3788.89	2090.08	1796.87	2783.66	2199.48	2308.29	3595.76
P62814	Atp6v1b2	V-type proton ATPase subunit B, brain isoform	21	4.01781	3.58544	9.24086	4.12596	3.47913	9.39204	4.21488	3.54086	9.29596	3.98838	3.58003	8.55015	4.10157	3.59201	9.00523	4.16627	3.6749	8.44852	1294.26	1154.97	2976.75	1329.09	1120.73	3025.45	1357.74	1140.62	2994.5	1284.77	1153.23	2754.26	1321.24	1157.09	2900.85	1342.08	1183.79	2721.52
O88587	Comt	Catechol O-methyltransferase	21	5.69731	4.51581	6.78147	5.76428	4.62939	6.87196	6.37333	4.50371	6.97371	5.77293	4.14432	5.70433	5.75472	4.69243	5.67428	5.67272	4.37964	6.09368	1487.46	1178.99	1770.51	1504.94	1208.64	1794.14	1663.95	1175.83	1820.7	1507.2	1082	1489.29	1502.45	1225.1	1481.44	1481.04	1143.44	1590.94
P28653	Bgn	Biglycan	21	9.74935	3.88088	2.08	10.3614	4.32998	1.98936	8.91223	4.69678	1.02749	10.7553	4.33124	2.59844	10.1029	4.43818	3.54806	10.1636	4.41953	2.61533	2052.19	816.908	437.83	2181.02	911.44	418.75	1875.98	988.651	216.282	2263.94	911.705	546.96	2126.62	934.217	746.85	2139.38	930.291	550.515
Q8K2A1	Gulp1	PTB domain-containing engulfment adapter protein 1	21	7.89671	7.7361	3.24624	7.79595	7.42547	3.06017	7.28836	7.80619	3.00803	6.16361	5.69371	2.95249	5.19797	5.78596	2.91892	6.63998	6.19378	3.19034	2969.27	2908.87	1220.63	2931.38	2792.07	1150.66	2740.52	2935.23	1131.06	2317.6	2140.91	1110.17	1954.51	2175.59	1097.55	2496.72	2328.94	1199.61
Q8R010	Aimp2	Aminoacyl tRNA synthase complex-interacting multifunctional protein 2	21	5.9032	4.54351	6.15939	7.3752	5.83294	4.72197	6.7086	6.12231	6.61111	5.89428	6.2181	5.14641	5.01253	4.06542	5.46106	4.70043	5.44825	4.07526	2280.93	1755.56	2379.92	2849.69	2253.78	1824.51	2592.12	2365.59	2554.45	2277.48	2402.6	1988.51	1936.78	1570.83	2110.09	1816.19	2105.14	1574.63
Q8BG05	Hnrnpa3	Heterogeneous nuclear ribonucleoprotein A3	21	6.42865	5.96938	5.33794	6.80936	5.91759	5.23273	6.2851	5.9948	4.90437	5.81053	5.32263	4.5547	5.90079	5.48598	4.18884	5.90796	5.23398	4.71465	1620.63	1504.85	1345.67	1716.61	1491.8	1319.15	1584.44	1511.26	1236.37	1464.81	1341.81	1148.22	1487.56	1382.99	1055.99	1489.37	1319.46	1188.54
Q9D554	Sf3a3	Splicing factor 3A subunit 3	21	6.43036	5.49522	5.14192	6.59686	5.57558	5.69536	6.78646	6.15655	5.5364	5.92691	5.23247	4.4188	6.08901	5.36095	4.19158	5.68108	5.10405	4.58044	2893.13	2472.39	2313.44	2968.04	2508.55	2562.44	3053.35	2769.94	2490.92	2666.62	2354.18	1988.09	2739.55	2411.99	1885.86	2556.02	2296.4	2060.82
Q8VDQ1	Ptgr2	Prostaglandin reductase 2	21	5.34679	7.77669	5.28289	5.12895	7.73191	4.40451	5.65782	7.49924	5.047	4.62034	6.3447	4.62409	4.37491	5.59923	4.82559	4.63738	6.35486	4.74309	892.38	1297.93	881.715	856.023	1290.46	735.113	944.291	1251.62	842.345	771.136	1058.93	771.761	730.172	934.512	805.392	773.979	1060.63	791.622
Q922B9	Itprid2	Protein ITPRID2	21	8.70599	7.838	2.02294	8.36643	8.23986	2.19312	8.94007	9.76644	1.68187	6.32342	6.17122	1.78741	5.37766	5.51741	1.64766	6.84717	6.59628	1.97705	2134.21	1921.43	495.909	2050.97	2019.95	537.63	2191.6	2394.18	412.3	1550.14	1512.83	438.171	1318.3	1352.55	403.913	1678.54	1617.03	484.661
O35218	Cpsf2	Cleavage and polyadenylation specificity factor subunit 2	21	5.99286	5.80179	5.27328	6.12046	5.69633	4.92636	5.9203	5.72879	5.05284	5.74679	5.81539	4.60141	5.98257	5.76321	4.68212	5.41826	6.09633	5.3809	1424.05	1378.65	1253.06	1454.37	1353.58	1170.62	1406.81	1361.3	1200.68	1365.58	1381.88	1093.41	1421.6	1369.48	1112.58	1287.51	1448.64	1278.63
P62331	Arf6	ADP-ribosylation factor 6	21	6.22431	5.93058	6.09804	6.30573	6.02342	5.36348	5.93532	6.14985	5.95851	5.40278	5.01598	4.89306	5.10798	4.71723	4.90658	5.52358	5.21103	5.23255	2298.3	2189.84	2251.67	2328.36	2224.12	1980.44	2191.59	2270.8	2200.15	1994.95	1852.13	1806.74	1886.1	1741.82	1811.73	2039.56	1924.15	1932.1
P51410	Rpl9	60S ribosomal protein L9	21	5.498	5.24294	4.6968	5.84551	6.07633	5.58805	7.09035	7.12148	5.56871	5.25229	5.69526	4.72222	5.8505	5.27592	4.80754	5.48467	5.7092	4.47421	3782.2	3606.74	3231.04	4021.27	4180.05	3844.15	4877.62	4899.03	3830.85	3613.17	3917.9	3248.53	4024.7	3629.43	3307.22	3773.03	3927.5	3077.92
Q8BVQ5	Ppme1	Protein phosphatase methylesterase 1	21	6.53415	3.39261	5.91829	6.77416	3.68523	5.30639	6.8122	3.68775	6.07616	7.49354	4.01184	6.4035	7.0861	3.93373	6.32561	6.96154	3.60245	5.99477	2555.64	1326.92	2314.77	2649.52	1441.37	2075.44	2664.4	1442.36	2376.52	2930.88	1569.11	2504.55	2771.52	1538.56	2474.08	2722.81	1408.99	2344.68
Q6PDM2	Srsf1	Serine/arginine-rich splicing factor 1	21	6.44957	6.05453	4.99545	6.26408	5.76309	4.87195	6.03399	6.17989	5.55637	6.17832	5.2068	4.13519	6.24937	5.85525	4.18154	6.22726	5.04053	4.75683	1790.15	1680.5	1386.54	1738.66	1599.61	1352.26	1674.8	1715.3	1542.23	1714.86	1445.2	1147.77	1734.58	1625.19	1160.63	1728.44	1399.05	1320.31
Q9QWR8	Naga	Alpha-N-acetylgalactosaminidase	21	6.53116	5.06384	6.14374	6.39043	4.94575	6.59692	8.02737	5.83357	6.67869	5.63848	4.25513	4.84558	5.26047	4.18664	4.49447	5.7141	4.22206	5.17159	2355.78	1826.52	2216.04	2305.02	1783.92	2379.5	2895.46	2104.16	2408.99	2033.79	1534.82	1747.79	1897.44	1510.11	1621.15	2061.07	1522.89	1865.38
P59808	Sash1	SAM and SH3 domain-containing protein 1	21	5.89924	7.97788	4.47408	5.37051	6.88729	3.97764	5.13692	7.07716	3.84857	5.5659	6.01192	4.37444	5.87686	6.8656	5.00295	5.524	5.79489	4.33414	1532.46	2072.43	1162.24	1395.11	1789.13	1033.28	1334.43	1838.45	999.751	1445.86	1561.73	1136.36	1526.64	1783.49	1299.62	1434.98	1505.35	1125.89
Q3TPX4	Exoc5	Exocyst complex component 5	21	5.24533	4.55047	6.59848	5.58944	4.88108	6.87343	5.78222	5.08018	7.12185	5.28615	4.60253	5.98044	5.42518	4.64907	6.06734	5.48545	4.60348	6.17788	1805.73	1566.52	2271.56	1924.19	1680.34	2366.21	1990.56	1748.88	2451.73	1819.78	1584.44	2058.8	1867.64	1600.47	2088.71	1888.39	1584.77	2126.77
P62301	Rps13	40S ribosomal protein S13	21	5.98912	5.66268	5.3551	5.68153	5.79054	4.95721	5.27885	5.27921	4.87763	5.53705	5.87255	5.63681	6.14442	5.76514	5.81217	5.6279	5.44086	5.29124	2720.63	2572.34	2432.62	2580.9	2630.42	2251.87	2397.98	2398.14	2215.72	2515.27	2667.68	2560.59	2791.17	2618.88	2640.25	2556.54	2471.57	2403.61
Q06138	Cab39	Calcium-binding protein 39	21	6.04538	5.93288	5.07103	5.79481	5.82131	5.02255	5.60327	5.45284	4.03401	6.3877	5.73419	5.08352	6.17942	5.93205	5.16176	6.21856	5.45974	5.06498	1775.56	1742.52	1489.39	1701.97	1709.75	1475.15	1645.71	1601.53	1184.81	1876.11	1684.17	1493.06	1814.93	1742.28	1516.04	1826.43	1603.56	1487.62
Q60865	Caprin1	Caprin-1	21	6.10197	5.85217	4.64342	6.17674	6.10143	4.72407	6.22029	5.95584	4.91047	6.02083	5.88529	4.59369	6.30265	5.90467	4.50455	6.09366	5.45226	4.55599	2573.76	2468.4	1958.56	2605.3	2573.54	1992.58	2623.67	2512.13	2071.2	2539.54	2482.37	1937.58	2658.41	2490.55	1899.99	2570.26	2299.72	1921.68
Q9Z1Q5	Clic1	Chloride intracellular channel protein 1	21	5.39931	3.34179	4.32955	5.74692	4.44957	6.06117	11.9205	8.39006	7.7706	5.95708	3.68533	4.13191	5.94642	4.12877	4.2765	6.13784	3.96821	4.35845	2995.1	1853.75	2401.68	3187.93	2468.26	3362.24	6612.53	4654.12	4310.5	3304.5	2044.32	2292.05	3298.59	2290.31	2372.25	3404.77	2201.24	2417.71
Q99LC3	Ndufa10	NADH dehydrogenase [ubiquinone] 1 alpha subcomplex subunit 10, mitochondrial	21	4.11726	6.56986	7.12126	3.90669	6.10372	6.9338	3.93407	5.40518	6.8123	4.04906	6.30391	7.1294	3.89524	5.13845	6.8194	3.92557	5.63788	6.19697	997.094	1591.05	1724.59	946.1	1478.16	1679.19	952.731	1308.99	1649.76	980.579	1526.64	1726.56	943.326	1244.4	1651.48	950.671	1365.35	1500.75
P60229	Eif3e	Eukaryotic translation initiation factor 3 subunit E	21	5.75799	5.59121	5.42481	5.84182	5.98893	5.20154	5.29182	5.68909	5.00559	5.6657	5.46255	5.40935	5.84783	5.83436	5.23452	5.94019	5.33905	5.47365	2684.25	2606.5	2528.93	2723.33	2791.91	2424.85	2466.93	2652.13	2333.5	2641.23	2546.53	2521.73	2726.13	2719.85	2440.22	2769.19	2488.95	2551.7
Q8K3C3	Lzic	Protein LZIC	21	5.84124	5.57542	5.92121	6.31351	5.71558	4.99265	6.22135	6.34314	7.65643	5.12789	4.95009	5.14337	4.60416	4.81763	5.08754	5.5616	4.74421	5.38298	1348.5	1287.13	1366.96	1457.53	1319.49	1152.59	1436.25	1464.37	1767.55	1183.82	1142.77	1187.39	1062.91	1112.19	1174.5	1283.94	1095.24	1242.7
A0A0R4IZW8	Capns1	Isoform of O88456, Calcium-activated neutral proteinase small subunit	21	5.82195	5.67509	5.1452	5.78387	5.83562	4.84364	5.63085	6.03	4.89681	5.89105	5.43124	5.17906	6.00473	5.98137	5.90281	5.67763	5.18387	5.08521	1173.36	1143.76	1036.97	1165.69	1176.11	976.191	1134.85	1215.29	986.907	1187.29	1094.62	1043.79	1210.2	1205.49	1189.66	1144.27	1044.76	1024.88
P68037	Ube2l3	Ubiquitin-conjugating enzyme E2 L3	21	5.21028	4.93488	5.67057	5.03077	4.7991	6.90954	6.2317	5.56671	6.69833	5.49237	4.76941	5.66623	5.55835	5.10517	6.02081	5.80464	4.87561	5.65556	1431.56	1355.89	1558.03	1382.24	1318.58	1898.44	1712.2	1529.49	1840.41	1509.07	1310.43	1556.83	1527.19	1402.68	1654.26	1594.86	1339.61	1553.9
G5E8K5	Ank3	Ankyrin-3	20	7.28085	3.20408	5.54473	8.24028	3.17947	4.86859	7.05232	2.89584	3.73384	6.82101	4.24934	5.61596	7.63035	5.30302	5.95715	8.0761	4.62224	5.72484	1775	781.126	1351.75	2008.9	775.125	1186.92	1719.29	705.979	910.276	1662.9	1035.95	1369.12	1860.21	1292.83	1452.3	1968.88	1126.86	1395.66
P14685	Psmd3	26S proteasome non-ATPase regulatory subunit 3	20	5.48765	5.04922	5.33111	5.68819	5.72377	6.01918	6.14985	6.40445	6.28194	5.37644	5.55807	5.2547	5.45042	5.08222	5.11579	5.56701	5.22054	5.23946	2380.79	2190.58	2312.87	2467.79	2483.22	2611.39	2668.08	2778.54	2725.39	2332.54	2411.34	2279.72	2364.64	2204.89	2219.46	2415.22	2264.9	2273.11
P42669	Pura	Transcriptional activator protein Pur-alpha	20	6.21039	4.74529	6.40274	6.10302	4.88592	5.8701	6.151	4.84246	6.47841	5.53087	4.44902	6.06117	5.26591	4.79699	5.89527	5.88598	4.55241	5.87305	1369.02	1046.05	1411.42	1345.35	1077.05	1294.01	1355.93	1067.47	1428.1	1219.23	980.743	1336.13	1160.82	1057.45	1299.55	1297.51	1003.53	1294.66
P47857	Pfkm	ATP-dependent 6-phosphofructokinase, muscle type	20	4.18354	3.83985	4.25606	4.31955	4.68292	4.86061	3.97167	4.12402	4.03433	5.8333	8.64771	6.61372	5.05059	8.70338	5.88456	5.79086	9.15207	6.05127	1410.44	1294.57	1434.89	1456.29	1578.8	1638.71	1339.01	1390.37	1360.13	1966.64	2915.49	2229.75	1702.75	2934.26	1983.92	1952.33	3085.53	2040.13
Q6NZD2	Snx1	Isoform of Q9WV80, Sorting nexin-1	20	7.382	5.75292	4.25833	7.54252	5.80802	3.91112	7.19508	5.97535	4.06184	7.15689	5.19789	3.48882	7.02724	5.73878	3.64611	6.98946	5.08211	3.78553	2039.9	1589.73	1176.72	2084.26	1604.96	1080.78	1988.25	1651.2	1122.43	1977.7	1436.36	964.081	1941.87	1585.82	1007.55	1931.43	1404.36	1046.07
D3Z2H9	Tpm3-rs7	Tropomyosin 3, related sequence 7	20	7.6466	5.311	4.48255	10.7535	4.84248	4.48198	5.81838	3.69225	8.8333	4.11559	2.79922	5.02477	8.12217	4.11726	3.38704	6.46497	3.34748	6.75948	3946.32	2740.95	2313.39	5549.75	2499.15	2313.1	3002.8	1905.53	4558.77	2124.01	1444.65	2593.22	4191.76	2124.87	1748.01	3336.5	1727.6	3488.49
A0JNY3	Gphn	Isoform of Q8BUV3, Molybdopterin molybdenumtransferase	20	4.23873	9.60617	4.27557	3.8844	9.12273	4.18228	3.8495	8.26714	4.26004	4.14981	8.45005	4.5554	3.91866	6.40825	4.34142	4.18745	7.84589	4.4565	1191.52	2700.32	1201.87	1091.92	2564.43	1175.65	1082.11	2323.92	1197.51	1166.53	2375.33	1280.54	1101.55	1801.38	1220.39	1177.11	2205.5	1252.74
Q62383	Supt6h	Transcription elongation factor SPT6	20	5.66205	6.06686	5.39663	5.86723	5.95079	5.44646	5.41509	5.70972	5.30143	5.65174	5.80883	5.12861	5.60922	5.8068	4.81936	5.40684	5.53249	5.41985	2148.5	2302.1	2047.78	2226.35	2258.06	2066.69	2054.79	2166.58	2011.65	2144.58	2204.19	1946.08	2128.45	2203.42	1828.73	2051.65	2099.33	2056.59
G3X8U3	Rik_2210016F16Rik	Queuosine salvage protein	20	6.28026	5.8209	5.49095	6.87711	6.50286	5.0429	6.78686	6.81182	5.40275	5.44293	5.40881	4.27426	5.28778	4.59481	4.42529	5.67377	5.33413	4.5418	1872.63	1735.66	1637.28	2050.6	1939.01	1503.68	2023.69	2031.13	1610.98	1622.96	1612.79	1274.49	1576.7	1370.07	1319.52	1691.79	1590.52	1354.26
O35206	Col15a1	Collagen alpha-1(XV) chain	20	0.907333	18.4497	0.763941	0.221764	17.2166	0.56249	0.73024	12.8185	0.703161	0.589916	19.6798	0.77991	0.740993	10.557	0.757113	0.823256	13.0393	0.659066	317.812	6462.38	267.586	77.6773	6030.47	197.024	255.782	4489.94	246.297	206.63	6893.26	273.179	259.548	3697.8	265.194	288.362	4567.27	230.851
F8VPM7	Erc1	Isoform of Q99MI1, ELKS/Rab6-interacting/CAST family member 1	20	7.33893	5.89827	4.93308	7.27599	5.7584	4.93609	6.70596	5.4209	4.68099	6.32711	4.72807	4.69874	6.31023	4.91643	4.27748	6.50161	4.57257	4.71916	2794.13	2245.63	1878.16	2770.17	2192.38	1879.3	2553.14	2063.89	1782.18	2408.91	1800.11	1788.94	2402.48	1871.82	1628.55	2475.34	1740.9	1796.71
Q3THS6	Mat2a	S-adenosylmethionine synthase isoform type-2	20	6.64238	6.72422	3.15764	6.35278	6.57838	3.31126	6.95867	6.48649	3.05887	6.79235	7.11939	3.47315	6.69857	6.42315	3.56815	6.66039	6.56083	3.43333	1595.56	1615.22	758.494	1525.99	1580.19	795.395	1671.53	1558.11	734.769	1631.58	1710.14	834.282	1609.06	1542.9	857.101	1599.89	1575.97	824.716
Q6ZPE2-2	Sbf1	Isoform of Q6ZPE2, Isoform 2 of Myotubularin-related protein 5	20	5.47734	5.00236	6.23641	5.65428	4.73452	5.73618	5.28701	4.47913	5.20342	5.95315	4.99087	6.32041	6.06446	5.17289	6.70655	5.62474	4.90016	6.45613	1304.68	1191.54	1485.49	1346.82	1127.74	1366.33	1259.34	1066.91	1239.43	1418.01	1188.8	1505.49	1444.53	1232.16	1597.47	1339.79	1167.2	1537.82
O70566	Diaph2	Protein diaphanous homolog 2	20	6.41123	5.98849	5.01982	6.05648	5.62294	4.70135	5.81782	5.00893	4.11233	6.70417	5.75303	4.46931	6.83889	6.20266	4.38863	6.7646	5.42722	4.7121	2304.29	2152.35	1804.2	2176.79	2020.96	1689.73	2091.01	1800.28	1478.03	2409.57	2067.72	1606.33	2458	2229.32	1577.34	2431.29	1950.62	1693.59
Q80U93	Nup214	Nuclear pore complex protein Nup214	20	5.77062	5.73573	6.10431	6.21304	5.69841	5.68429	5.93657	5.29843	5.84936	5.29726	5.09048	5.20689	5.67205	5.42324	5.10082	5.42895	4.93021	5.55932	1605.9	1596.19	1698.76	1729.02	1585.8	1581.87	1652.08	1474.49	1627.81	1474.17	1416.62	1449.02	1578.47	1509.23	1419.5	1510.82	1372.02	1547.1
O54950	Prkag1	5'-AMP-activated protein kinase subunit gamma-1	20	6.21963	4.59263	6.04555	6.02747	4.59587	6.43223	5.72101	4.33743	5.53589	6.03204	4.9381	6.02164	5.9497	4.83042	5.4575	6.27775	4.95143	6.03372	2644.45	1952.69	2570.44	2562.75	1954.06	2734.84	2432.45	1844.18	2353.74	2564.7	2099.57	2560.27	2529.68	2053.79	2320.41	2669.16	2105.24	2565.41
P05063	Aldoc	Fructose-bisphosphate aldolase C	20	7.80072	11.2769	1.27769	6.67771	10.3185	2.62208	8.41679	12.2137	2.0942	6.27515	3.79818	1.71914	6.3634	2.98882	2.18324	7.40692	4.30462	2.26212	2572.55	3718.95	421.362	2202.2	3402.88	864.718	2775.72	4027.89	690.635	2069.44	1252.58	566.945	2098.54	985.665	719.995	2442.68	1419.59	746.011
Q9CQ60	Pgls	6-phosphogluconolactonase	20	5.85604	7.10085	5.05865	4.69034	6.15895	4.08492	5.19518	5.51026	4.5534	6.87531	7.28297	5.19124	5.75433	5.64849	5.00941	5.2512	5.7446	5.03384	1673.52	2029.26	1445.65	1340.39	1760.08	1167.37	1484.66	1574.71	1301.26	1964.8	2081.3	1483.54	1644.45	1614.21	1431.57	1500.67	1641.67	1438.55
P13595	Ncam1	Neural cell adhesion molecule 1	20	6.38751	3.01195	3.7577	6.27803	3.23877	4.10211	6.60325	3.28568	3.16326	8.57057	5.13897	5.96144	9.58172	6.00355	5.20737	8.19194	5.53906	5.97713	3350.77	1580.01	1971.22	3293.33	1699	2151.89	3463.94	1723.61	1659.38	4495.96	2695.8	3127.26	5026.39	3149.35	2731.69	4297.33	2905.68	3135.49
Q60875	Arhgef2	Rho guanine nucleotide exchange factor 2	20	6.40435	4.51469	4.2931	6.65979	4.76561	4.80804	7.24857	4.92975	4.33308	7.11038	5.36235	4.89149	6.95992	5.6999	4.53715	6.77374	5.70647	5.00163	2098.63	1479.41	1406.8	2182.33	1561.63	1575.54	2375.27	1615.42	1419.9	2329.99	1757.18	1602.88	2280.68	1867.79	1486.77	2219.67	1869.94	1638.97
P09041	Pgk2	Phosphoglycerate kinase 2	20	7.14395	3.67577	5.48822	6.78092	3.44089	5.0032	6.56047	3.24138	4.75896	7.39458	3.85943	6.1802	7.67921	4.24531	6.51311	7.74423	4.00219	6.28798	3481.21	1791.18	2674.38	3304.31	1676.73	2438.04	3196.88	1579.51	2319.02	3603.34	1880.68	3011.58	3742.04	2068.72	3173.81	3773.73	1950.25	3064.1
Q8CDM8	Fhip2a	FHF complex subunit HOOK interacting protein 2A	20	6.57825	5.04053	5.06876	6.78295	5.3037	4.75517	7.04445	5.65279	4.74573	6.54043	4.93908	4.79097	6.83945	4.67032	5.12347	6.49035	5.00202	4.63159	2274.09	1742.51	1752.26	2344.86	1833.48	1643.86	2435.26	1954.16	1640.59	2261.02	1707.43	1656.23	2364.39	1614.53	1771.18	2243.71	1729.19	1601.14
Q8CDJ8	Ston1	Stonin-1	20	7.70276	5.32893	3.94824	7.87022	5.28592	3.91727	7.8767	6.1094	3.66008	6.70044	4.94908	4.25247	6.35034	5.18481	4.94501	6.80433	5.04989	4.06413	3714.32	2569.64	1903.86	3795.07	2548.9	1888.93	3798.19	2945.99	1764.91	3230.99	2386.47	2050.56	3062.17	2500.15	2384.51	3281.08	2435.08	1959.75
P97370	Atp1b3	Sodium/potassium-transporting ATPase subunit beta-3	20	6.78005	4.77456	5.27368	6.26995	4.93643	6.2947	7.80955	5.84863	5.74304	6.02935	4.22656	5.28321	5.51872	4.01602	5.32852	6.20787	4.33067	5.32847	2582.26	1818.45	2008.54	2387.98	1880.1	2397.41	2974.36	2227.52	2187.3	2296.35	1609.74	2012.17	2101.87	1529.55	2029.43	2364.34	1649.39	2029.41
Q8R5C5	Actr1b	Beta-centractin	20	5.69029	5.15368	6.15849	5.45894	5.31149	5.9282	5.33607	5.08611	5.68228	5.63261	5.26393	6.10513	5.60271	5.25869	5.77458	5.54928	5.03581	5.97171	2846.94	2578.46	3081.19	2731.19	2657.42	2965.97	2669.72	2544.66	2842.93	2818.08	2633.63	3054.49	2803.12	2631	2889.11	2776.39	2519.49	2987.74
Q0VGY8	Tanc1	Protein TANC1	20	4.28648	4.76125	8.77454	4.32067	4.85353	7.57296	4.6089	5.14489	8.7627	4.56043	4.65157	6.30702	4.67758	4.56043	6.24085	4.56202	4.73831	6.61587	1050.97	1167.38	2151.37	1059.36	1190.01	1856.77	1130.03	1261.44	2148.47	1118.14	1140.49	1546.38	1146.87	1118.14	1530.16	1118.53	1161.76	1622.1
Q02819	Nucb1	Nucleobindin-1	20	6.58386	7.03401	4.41806	8.41396	6.99725	2.27936	6.06424	4.56626	3.12807	7.29179	5.13476	3.9464	8.12142	5.85573	4.228	7.60879	4.94823	3.37979	1125.32	1202.26	755.141	1438.12	1195.98	389.59	1036.51	780.47	534.654	1246.32	877.64	674.524	1388.12	1000.87	722.655	1300.5	845.758	577.678
P56695	Wfs1	Wolframin	20	1.97484	1.67592	4.0472	2.44717	2.31782	6.18982	1.99471	1.81189	4.58644	4.64659	6.11885	15.9292	4.11429	6.92165	12.3945	4.15763	5.97409	12.6974	814.975	691.616	1670.19	1009.89	956.515	2554.4	823.175	747.729	1892.72	1917.55	2525.12	6573.66	1697.88	2856.42	5114.94	1715.76	2465.38	5239.93
Q8BJS4	Sun2	SUN domain-containing protein 2	20	7.5749	8.23088	1.90372	8.69352	7.96213	1.70501	8.20016	8.75988	1.74273	6.36112	6.67875	1.71901	5.7872	7.15067	1.64169	6.24259	7.87557	1.77045	1995.23	2168.01	501.44	2289.87	2097.23	449.1	2159.92	2307.35	459.036	1675.52	1759.18	452.786	1524.35	1883.49	432.422	1644.3	2074.43	466.335
Q9D666	Sun1	SUN domain-containing protein 1	20	5.90317	5.90634	5.03517	6.61396	6.27498	4.71124	5.96363	6.12651	4.98016	5.69236	6.35784	4.80459	5.07992	5.61116	4.46998	5.39852	6.43963	4.63085	1568.48	1569.32	1337.85	1757.34	1667.27	1251.78	1584.55	1627.82	1323.23	1512.47	1689.29	1276.59	1349.74	1490.89	1187.68	1434.4	1711.02	1230.42
Q6ZQ73	Cand2	Cullin-associated NEDD8-dissociated protein 2	20	4.38074	4.02096	5.69423	4.39162	3.7981	6.35951	4.13994	3.84532	5.48629	5.87087	5.53791	8.04443	5.75876	6.57472	7.1919	5.69018	5.6414	7.57313	1102.76	1012.19	1433.4	1105.49	956.087	1600.87	1042.14	967.974	1381.05	1477.86	1394.05	2025.01	1449.64	1655.04	1810.4	1432.38	1420.1	1906.37
Q6NZN0	Rbm26	RNA-binding protein 26	20	5.7076	5.4662	5.44146	5.79744	5.5914	6.06096	6.06889	5.96368	5.88237	5.55521	5.41692	4.99876	5.72801	5.51009	4.59865	5.61454	5.29976	5.29805	1009.9	967.189	962.811	1025.8	989.341	1072.42	1073.83	1055.21	1040.83	982.938	958.47	884.48	1013.51	974.955	813.684	993.436	937.739	937.436
P17156	Hspa2	Heat shock-related 70 kDa protein 2	20	6.94675	6.06275	3.8793	7.10619	5.96813	3.89239	7.60523	6.28209	3.75279	6.40401	5.49319	4.23743	6.00168	5.96421	4.38538	6.21883	5.55257	4.2471	2688.3	2346.21	1501.24	2750.01	2309.59	1506.31	2943.13	2431.09	1452.28	2478.27	2125.8	1639.83	2322.57	2308.07	1697.09	2406.61	2148.77	1643.57
Q5SNZ0	Ccdc88a	Girdin	20	6.47455	4.76634	6.26545	6.39819	4.53365	6.11915	5.73668	4.43824	5.46795	6.28922	4.61327	5.85455	6.22902	4.98157	4.6351	6.33611	4.79135	6.06963	1246.91	917.935	1206.65	1232.21	873.123	1178.47	1104.81	854.747	1053.06	1211.22	888.456	1127.51	1199.63	959.386	892.66	1220.25	922.751	1168.93
Q99PT1	Arhgdia	Rho GDP-dissociation inhibitor 1	20	6.41873	5.46272	5.10047	6.4378	5.20302	5.34879	7.04993	6.00456	6.295	5.80033	4.48686	4.74343	5.91683	5.57436	4.62356	5.96053	4.41952	5.15358	3270.07	2783.03	2598.47	3279.79	2650.72	2724.98	3591.64	3059.07	3207.04	2955.02	2285.87	2416.58	3014.37	2839.9	2355.51	3036.64	2251.56	2625.53
Q6KCD5	Nipbl	Nipped-B-like protein	20	6.33082	6.04242	4.97756	6.40405	5.85291	5.1414	6.29302	5.91833	4.82211	6.0816	5.59011	4.55653	6.12392	5.71592	3.91347	6.01015	5.46809	4.75758	1150.5	1098.09	904.568	1163.8	1063.65	934.344	1143.63	1075.53	876.319	1105.21	1015.89	828.056	1112.9	1038.75	711.193	1092.22	993.714	864.592
P97429	Anxa4	Annexin A4	20	8.17641	6.95746	1.9174	6.95696	5.64352	2.17817	7.67479	7.00141	2.55318	9.88452	7.7315	2.74251	6.63742	5.67898	2.97059	7.06818	5.47601	2.75099	2196.16	1868.75	515.008	1868.62	1515.83	585.05	2061.42	1880.56	685.776	2654.95	2076.66	736.629	1782.79	1525.35	797.892	1898.49	1470.84	738.905
A0A1L1SSC7	Ttc13	Tetratricopeptide repeat domain 13	20	3.94115	4.68859	7.61597	3.78391	4.65873	7.3689	3.52106	3.98055	6.82096	4.02807	4.84754	8.73546	4.14533	4.63402	10.2612	3.98865	4.6645	8.31535	884.61	1052.38	1709.44	849.315	1045.67	1653.98	790.319	893.453	1531	904.119	1088.05	1960.71	930.438	1040.13	2303.18	895.27	1046.97	1866.42
O35691	Pnn	Pinin	20	5.99128	5.78388	6.12803	5.64045	5.17258	5.64326	5.18778	5.33941	5.47374	5.73947	5.1749	5.19578	6.16496	5.76393	5.03457	5.6543	5.1497	5.76199	2174.35	2099.08	2223.98	2047.03	1877.23	2048.05	1882.74	1937.78	1986.53	2082.97	1878.07	1885.65	2237.38	2091.84	1827.14	2052.06	1868.93	2091.14
Q9D706	Rpap3	RNA polymerase II-associated protein 3	20	6.37101	6.09103	4.49932	5.89466	5.68106	4.77738	5.97531	5.57194	4.12021	6.40921	5.63491	4.7248	6.56972	5.81897	5.16739	6.39189	5.40773	4.89346	1238.92	1184.48	874.951	1146.29	1104.76	929.022	1161.97	1083.54	801.228	1246.35	1095.78	918.797	1277.57	1131.57	1004.87	1242.98	1051.6	951.596
Q9D662	Sec23b	Protein transport protein Sec23B	20	5.18571	4.2532	7.28567	5.45258	4.53993	6.66914	6.36184	5.44013	8.07403	5.26695	4.52798	5.55157	5.74758	4.6295	5.67895	5.18867	4.40296	5.74362	1290.34	1058.31	1812.87	1356.75	1129.66	1659.46	1583	1353.65	2009.03	1310.56	1126.68	1381.38	1430.15	1151.94	1413.07	1291.08	1095.57	1429.17
Q99JI4	Psmd6	26S proteasome non-ATPase regulatory subunit 6	20	5.14507	4.98033	5.27824	5.49693	5.45611	7.02634	6.81019	6.64252	7.15129	4.91599	5.14283	5.04304	5.22257	5.41755	4.93492	5.24846	5.03186	5.05576	1922.36	1860.81	1972.12	2053.83	2038.58	2625.27	2544.5	2481.86	2671.95	1836.77	1921.53	1884.24	1951.32	2024.17	1843.84	1960.99	1880.06	1888.99
Q4VA53	Pds5b	Sister chromatid cohesion protein PDS5 homolog B	20	6.00905	6.49663	5.77591	5.87986	6.02958	5.36711	5.18311	5.59033	4.65165	5.72362	5.80663	4.68585	5.73604	6.23556	4.27298	5.78925	5.83117	4.93568	3298.76	3566.43	3170.77	3227.84	3310.03	2946.36	2845.35	3068.9	2553.6	3142.07	3187.64	2572.37	3148.89	3423.11	2345.72	3178.1	3201.11	2709.52
Q7TSV4	Pgm2	Phosphoglucomutase-2	20	4.58967	3.62938	9.41036	4.29218	3.44915	9.52224	4.6479	3.39612	8.90189	4.54359	3.68423	7.54275	4.60572	4.36439	6.67186	4.65611	3.76214	8.33033	1792.04	1417.1	3674.29	1675.89	1346.73	3717.97	1814.78	1326.02	3475.76	1774.05	1438.51	2945.08	1798.31	1704.08	2605.04	1817.98	1468.93	3252.59
P46425	Gstp2	Glutathione S-transferase P 2	20	4.2578	4.87265	7.88214	4.18097	4.9628	7.59482	4.01361	4.90169	7.61872	4.27807	4.61444	7.25411	4.18484	5.25905	7.52338	4.28136	4.72452	7.59504	846.955	969.261	1567.9	831.673	987.193	1510.75	798.381	975.037	1515.5	850.987	917.897	1442.98	832.442	1046.12	1496.54	851.642	939.796	1510.79
Q9JIG7	Ccdc22	Coiled-coil domain-containing protein 22	20	5.80758	5.20912	6.46639	5.65092	4.99672	6.23922	5.33847	4.91756	5.86566	5.4392	4.66807	6.17757	5.51796	5.25421	6.26881	5.60327	4.60641	5.97284	2460.52	2206.96	2739.64	2394.14	2116.97	2643.39	2261.77	2083.44	2485.12	2304.44	1977.74	2617.27	2337.81	2226.07	2655.93	2373.95	1951.61	2530.53
Q91VH2	Snx9	Sorting nexin-9	20	8.9003	5.04585	3.50375	8.30998	4.79039	3.21541	8.43411	4.84773	2.58565	8.87972	4.91858	3.14732	8.52465	5.04622	3.19152	8.52631	4.84371	3.28879	4187.63	2374.1	1648.53	3909.88	2253.9	1512.87	3968.29	2280.88	1216.56	4177.95	2314.21	1480.83	4010.89	2374.27	1501.62	4011.67	2278.99	1547.39
O08808	Diaph1	Protein diaphanous homolog 1	20	7.26183	5.94751	2.83799	7.26214	5.81813	2.77986	7.33307	5.7613	1.98833	8.02527	6.2757	3.36338	7.80312	6.82791	3.36288	7.68956	6.1918	3.47021	3429.56	2808.84	1340.3	3429.7	2747.74	1312.85	3463.2	2720.9	939.033	3790.11	2963.84	1588.43	3685.19	3224.63	1588.19	3631.56	2924.21	1638.88
P51859	Hdgf	Hepatoma-derived growth factor	20	6.69963	5.86249	5.01624	6.74563	5.66213	4.67617	6.36224	5.19982	5.15474	6.44958	5.09395	4.38337	6.40792	5.98401	3.91979	6.64215	4.91004	4.8301	4883.04	4272.89	3656.1	4916.56	4126.85	3408.23	4637.13	3789.9	3757.05	4700.79	3712.74	3194.83	4670.42	4361.46	2856.95	4841.15	3578.69	3520.43
P62270	Rps18	40S ribosomal protein S18	20	5.83136	5.49851	5.64985	5.66514	5.77478	5.19259	5.62785	5.69572	4.99015	5.32838	5.67189	5.40873	5.97069	5.66538	5.65825	5.73095	5.38739	5.2524	3474.66	3276.33	3366.51	3375.62	3440.95	3094.05	3353.4	3393.84	2973.42	3174.96	3379.64	3222.84	3557.69	3375.76	3371.52	3414.83	3210.12	3129.68
Q9Z277	Baz1b	Tyrosine-protein kinase BAZ1B	20	5.89576	6.98206	4.68005	5.86876	6.85476	4.73812	5.37668	6.71039	4.31835	6.00174	6.50797	3.96723	5.7821	6.67583	3.48169	5.56803	6.08024	4.51025	1366.19	1617.92	1084.48	1359.94	1588.42	1097.94	1245.91	1554.96	1000.67	1390.75	1508.06	919.306	1339.86	1546.96	806.796	1290.25	1408.94	1045.14
Q61753	Phgdh	D-3-phosphoglycerate dehydrogenase	20	5.67366	5.52935	4.18191	5.65097	5.92684	4.56896	5.63001	5.8777	4.03536	6.29172	6.09496	4.85669	6.48854	6.54284	5.30434	6.01404	6.49418	4.83793	1780.55	1735.26	1312.4	1773.43	1860	1433.86	1766.85	1844.58	1266.41	1974.51	1912.76	1524.16	2036.28	2053.32	1664.65	1887.37	2038.05	1518.27
O88811	Stam2	Signal transducing adapter molecule 2	20	6.31467	5.30501	5.46959	6.5767	5.1283	4.79667	6.04729	4.9769	4.92058	6.24911	4.91971	5.08474	6.36656	5.47637	5.7541	6.43846	5.05576	5.11948	3274.91	2751.28	2836.64	3410.81	2659.64	2487.64	3136.24	2581.12	2551.91	3240.91	2551.46	2637.04	3301.82	2840.15	2984.19	3339.11	2622.02	2655.06
Q9WUM3	Coro1b	Coronin-1B	20	6.69919	5.94923	4.86523	6.97658	6.30015	4.49692	6.89569	6.11731	4.99879	6.45219	5.71615	3.99612	5.81687	4.93508	4.28496	5.96045	5.33358	4.20552	1399.21	1242.57	1016.16	1457.14	1315.86	939.237	1440.25	1277.67	1044.06	1347.62	1193.89	834.637	1214.92	1030.75	894.965	1244.91	1113.98	878.372
Q9WUM4	Coro1c	Coronin-1C	20	5.15075	3.90003	6.91909	5.24164	4.03746	6.95262	5.23567	4.04363	6.99862	5.76945	4.38811	6.99489	6.14852	4.60269	7.26182	5.31003	4.37908	6.6659	1632.2	1235.87	2192.57	1661.01	1279.42	2203.19	1659.11	1281.37	2217.77	1828.26	1390.53	2216.59	1948.38	1458.53	2301.17	1682.68	1387.67	2112.33
P18242	Ctsd	Cathepsin D	20	4.66583	5.59978	5.70378	4.61548	6.09018	6.17377	5.16246	6.51136	6.49202	4.41776	5.87296	6.50614	4.17819	5.06291	6.82896	4.581	5.49389	6.04353	1798.64	2158.67	2198.76	1779.23	2347.72	2379.94	1990.09	2510.08	2502.63	1703.01	2263.98	2508.07	1610.66	1951.71	2632.51	1765.94	2117.85	2329.73
P62082	Rps7	40S ribosomal protein S7	20	5.592	5.53804	5.68274	5.87182	5.80648	5.30679	5.10275	5.48391	4.76533	5.26083	5.55731	5.69578	5.98116	5.8968	5.81266	5.87705	5.34066	5.42789	3116.59	3086.51	3167.16	3272.54	3236.12	2957.63	2843.92	3056.34	2655.86	2932.02	3097.25	3174.43	3333.48	3286.46	3239.57	3275.46	2976.51	3025.12
Q6VNB8	Wdfy3	WD repeat and FYVE domain-containing protein 3	20	5.21356	5.09664	6.03478	5.2489	5.20686	6.67515	7.10323	6.54897	6.92323	5.24345	5.38602	4.86946	5.2622	5.08479	4.46481	5.15224	5.21144	5.27427	747.885	731.114	865.69	752.956	746.925	957.55	1018.96	939.45	993.138	752.173	772.625	698.525	754.863	729.414	640.477	739.089	747.581	756.595
Q61543	Glg1	Golgi apparatus protein 1	20	7.09137	4.19743	4.60396	7.12388	4.07923	4.52851	7.4457	4.14533	4.04452	8.1553	4.43632	4.46372	8.22583	5.23592	4.55521	8.037	4.62363	5.00714	3088.51	1828.11	2005.17	3102.67	1776.63	1972.31	3242.84	1805.42	1761.51	3551.89	1932.15	1944.09	3582.61	2280.41	1983.94	3500.36	2013.74	2180.77
P97346	Nxn	Nucleoredoxin	20	5.11362	4.58361	6.78578	4.79986	4.29654	5.91514	4.56728	4.13859	4.42819	5.72616	4.41321	8.26566	5.82606	5.09518	8.60935	5.41903	4.47799	7.53874	1650.54	1479.46	2190.26	1549.26	1386.8	1909.25	1474.19	1335.82	1429.3	1848.25	1424.46	2667.93	1880.49	1644.58	2778.86	1749.11	1445.37	2433.3
Q9WV02	Rbmx	RNA-binding motif protein, X chromosome	20	5.93599	5.59209	6.06973	5.95533	5.88929	5.82502	5.64146	5.47208	6.13413	5.28824	5.19239	5.28995	5.44851	5.4499	4.95299	5.52998	4.77575	5.55718	2272.74	2141.07	2323.95	2280.15	2254.86	2230.25	2159.98	2095.12	2348.6	2024.74	1988.04	2025.39	2086.1	2086.63	1896.38	2117.29	1828.51	2127.71
O35250	Exoc7	Exocyst complex component 7	20	5.54031	5.03962	6.56218	5.54396	4.80456	6.36877	5.2575	4.59899	5.83163	5.72644	4.68408	6.2641	5.6949	5.25673	6.07468	5.70362	4.76373	6.28418	2471.13	2247.81	2926.91	2472.76	2142.97	2840.65	2344.99	2051.28	2601.07	2554.15	2089.23	2793.96	2540.09	2344.65	2709.48	2543.97	2124.76	2802.92
P62046	Lrch1	Leucine-rich repeat and calponin homology domain-containing protein 1	20	10.2542	5.06751	1.66946	10.9383	5.42332	1.4768	11.3445	6.01292	0.998339	8.63362	4.88897	1.78077	7.49102	5.42134	1.87211	9.40988	5.321	1.99593	3744.14	1850.31	609.572	3993.91	1980.23	539.226	4142.25	2195.51	364.525	3152.41	1785.12	650.217	2735.21	1979.5	683.567	3435.85	1942.87	728.776
Q45VK7	Dync2h1	Cytoplasmic dynein 2 heavy chain 1	20	8.24137	6.89914	3.37174	8.02652	6.54236	3.70312	7.78755	6.37486	3.06982	7.1407	5.99495	2.63856	6.48839	5.24577	2.26773	7.26113	5.73933	3.20696	1528.74	1279.76	625.445	1488.89	1213.58	686.915	1444.56	1182.51	569.439	1324.57	1112.04	489.442	1203.57	973.07	420.654	1346.91	1064.62	594.878
A0A2I3BR81	Nt5dc2	5'-nucleotidase domain-containing 2	20	2.62907	7.33254	7.71115	2.28377	7.24761	7.68493	2.36157	7.26496	7.55164	2.65982	6.51115	7.52415	2.84471	5.27825	7.70612	2.6868	6.06856	6.6532	735.476	2051.26	2157.17	638.877	2027.5	2149.84	660.641	2032.35	2112.55	744.078	1821.47	2104.86	795.798	1476.57	2155.76	751.623	1697.66	1861.21
Q8BQ30	Ppp1r18	Phostensin	20	6.26055	4.23349	6.52654	6.41524	4.06023	6.51516	6.03961	3.89892	5.98105	6.46899	3.83929	5.97922	6.66684	4.90563	5.96044	6.21785	4.02426	6.00669	1666.31	1126.79	1737.11	1707.49	1080.67	1734.08	1607.51	1037.74	1591.92	1721.79	1021.87	1591.43	1774.45	1305.69	1586.44	1654.95	1071.1	1598.75
Q00560	Il6st	Interleukin-6 receptor subunit beta	20	8.46123	4.546	2.49373	9.26694	4.60574	2.3597	8.00886	4.28424	2.06048	8.05601	5.30471	2.42357	10.1135	7.70393	2.36165	9.31052	5.773	2.8662	2705.58	1453.64	797.402	2963.22	1472.74	754.544	2560.93	1369.94	658.863	2576.01	1696.25	774.969	3233.91	2463.43	755.168	2977.16	1845.99	916.504
Q9JK81	Myg1	MYG1 exonuclease	20	6.17435	5.96599	5.21891	6.45328	6.20281	5.19556	7.15263	6.4162	6.18188	5.64712	5.08973	4.23524	5.23354	5.29389	4.20457	5.78785	4.94494	4.60151	1714.1	1656.26	1448.85	1791.54	1722	1442.37	1985.69	1781.24	1716.19	1567.73	1412.99	1175.77	1452.92	1469.67	1167.26	1606.8	1372.8	1277.45
Q60790	Rasa3	Ras GTPase-activating protein 3	20	7.88124	8.34683	0.876954	7.51729	8.63271	0.992982	7.61467	8.73112	0.535069	6.4936	8.66922	1.37085	6.43418	8.25028	1.52908	6.44388	8.2889	1.39116	2120.97	2246.27	236.003	2023.03	2323.21	267.228	2049.23	2349.69	143.996	1747.54	2333.03	368.918	1731.55	2220.29	411.502	1734.16	2230.68	374.385
Q8VD65	Pik3r4	Phosphoinositide 3-kinase regulatory subunit 4	20	5.94825	5.0881	5.90673	5.87926	5.2417	5.59314	5.62541	4.95791	5.0951	5.90108	5.24484	5.81249	6.01511	5.26476	5.86284	5.67222	5.24434	5.64672	1892.69	1618.99	1879.48	1870.74	1667.87	1779.69	1789.96	1577.57	1621.22	1877.68	1668.87	1849.49	1913.96	1675.21	1865.51	1804.86	1668.71	1796.74
F7AA26	Pakap	Isoform of O54931, Paralemmin A kinase anchor protein (Fragment)	20	5.25344	4.08971	5.80008	5.30253	3.76094	5.5496	4.55175	3.59657	4.89879	6.58836	4.78294	7.25809	6.22308	5.9064	8.69467	6.26316	4.76621	6.71367	1209.93	941.912	1335.83	1221.24	866.193	1278.14	1048.33	828.335	1128.25	1517.38	1101.57	1671.63	1433.25	1360.32	2002.49	1442.49	1097.72	1546.24
Q505F5	Lrrc47	Leucine-rich repeat-containing protein 47	20	5.51867	5.76685	6.18309	5.28117	5.28534	6.1722	5.48474	5.80155	6.27314	5.39264	5.17296	5.65271	5.19441	5.46181	5.37383	5.21631	5.00478	5.76381	872.467	911.703	977.51	834.92	835.58	975.787	867.104	917.19	991.745	852.543	817.814	893.66	821.204	863.48	849.57	824.666	791.226	911.223
A0A2I3BRX9	Ralgapa1	Isoform of Q6GYP7, Ral GTPase-activating protein subunit alpha-1	20	6.93359	5.17917	4.83532	7.08603	5.0214	4.56365	6.71777	5.29479	4.27181	6.42361	5.68345	4.81765	6.19704	5.83544	4.48299	6.37975	5.50883	4.76773	1270.65	949.136	886.121	1298.59	920.222	836.335	1231.1	970.325	782.852	1177.19	1041.55	882.883	1135.67	1069.4	821.553	1169.15	1009.55	873.734
Q9JHS4	Clpx	ATP-dependent Clp protease ATP-binding subunit clpX-like, mitochondrial	20	4.71518	7.69309	5.51913	4.665	7.13707	5.20304	4.68302	6.37521	4.96428	4.29106	7.05475	5.3631	4.68246	5.55932	5.45561	4.57051	6.90623	5.16193	1452.03	2369.08	1699.61	1436.58	2197.85	1602.27	1442.13	1963.24	1528.74	1321.43	2172.5	1651.56	1441.96	1711.98	1680.05	1407.48	2126.76	1589.61
Q8CJ53	Trip10	Cdc42-interacting protein 4	20	7.01577	4.4377	5.88835	8.14279	4.74696	4.84509	7.5077	5.22898	7.16008	6.16514	4.05601	4.66641	6.07043	4.25315	4.6548	6.21687	3.95076	4.99301	1495.48	945.941	1255.16	1735.72	1011.86	1032.78	1600.34	1114.61	1526.24	1314.16	864.579	994.693	1293.97	906.602	992.218	1325.19	842.144	1064.31
P15532	Nme1	Nucleoside diphosphate kinase A	20	4.50709	4.95714	6.59903	4.52402	4.77244	6.93769	4.67525	5.11452	7.10745	4.70065	4.77888	6.98637	4.84451	5.72628	7.22688	4.78274	4.8902	6.86885	1004.7	1105.03	1471.03	1008.48	1063.85	1546.52	1042.19	1140.11	1584.37	1047.85	1065.29	1557.38	1079.92	1276.48	1610.99	1066.15	1090.11	1531.18
Q9WV32	Arpc1b	Actin-related protein 2/3 complex subunit 1B	20	5.46389	4.86207	5.82723	6.743	5.43088	5.71677	7.12302	7.16221	9.33348	5.42589	4.91009	4.87874	4.59278	4.29724	5.18461	4.46465	4.51453	4.06891	1240.06	1103.48	1322.53	1530.36	1232.57	1297.45	1616.61	1625.51	2118.29	1231.44	1114.37	1107.26	1042.36	975.284	1176.68	1013.28	1024.6	923.463
Q61024	Asns	Asparagine synthetase [glutamine-hydrolyzing]	20	5.46059	4.99493	3.7435	5.68974	4.82689	3.87745	5.15367	4.24207	3.11498	8.13	5.69584	5.1843	9.44414	6.41332	5.75336	7.2471	6.2108	4.81733	2466.71	2256.35	1691.05	2570.22	2180.45	1751.56	2328.06	1916.26	1407.12	3672.56	2572.98	2341.9	4266.19	2897.09	2598.96	3273.72	2805.6	2176.13
[truncated: 7,298 more rows]

## Sheet: Phos-Legend
Tabs:	Site Quant				SampleID	treatment	age
	Composite	2 or more sites on the same peptide			1	control	4
					2	2c	4
Columns:	ProteinID	Protein ID			3	7c	4
	GeneSymbol	Gene Symbol			4	control	4
	Description	Description			5	2c	4
	SitePosition	Mod site residue #			6	7c	4
[truncated: 12 more rows]

## Sheet: Phos-Site Quant
									Summed S/N, Globally Normalized to Protein Data, Scaled to 100 per Site																		Summed S/N, Globally Normalized to Protein Data
[truncated: 7,761 more rows]

[truncated: 1 more sheets: Phos-Composite]
