# Supplementary material for: Multi-omics characterization of partial chemical reprogramming reveals evidence of cell rejuvenation
Source: eLife. 2024 Mar 22;12:RP90579. doi: 10.7554/eLife.90579 (PMC10959535; doi:10.7554/eLife.90579)
Supplement: Supplementary file 3. — Observed alternative splicing events. [file elife-90579-supp3.xlsx]

## Sheet: PSI_merge
AS_type	AS	region	4_2c	4_7c	4_7c	20_2c	4_2c	4_control	4_2c	4_control	20_2c	20_control	4_2c	4_control	20_control	20_control	20_7c	20_7c	4_7c	20_control	4_7c	20_2c	20_2c	20_7c	4_control	20_7c
SE	Specc1l:chr10:75241064-75241218:75245078-75246712:75248436-75248644:+	chr10:75245078-75246712	NA	0.984	0.96	NA	0.99	NA	NA	NA	NA	0.981	NA	0.991	NA	NA	0.987	NA	0.991	NA	NA	NA	NA	0.931	NA	NA
SE	Ap2b1:chr11:83302482-83302837:83308214-83308274:83316419-83316515:+	chr11:83308214-83308274	NA	0.974	0.97	NA	NA	0.974	0.984	NA	0.987	NA	0.935	0.983	0.919	0.985	NA	NA	NA	NA	NA	0.908	NA	NA	0.981	NA
RI	Rnpepl1:chr1:92918017-92918126:92918017-92919103:92918905-92919103:+	chr1:92918126-92918905	0.783	NA	0.194	0.649	0.905	0.41	0.83	0.676	NA	NA	0.813	NA	NA	0.591	NA	NA	NA	NA	NA	NA	NA	NA	NA	NA
SE	Ifih1:chr2:62623392-62623497:62635055-62635202:62639329-62639473:-	chr2:62635055-62635202	NA	NA	NA	NA	NA	NA	NA	NA	NA	NA	NA	NA	NA	NA	NA	NA	NA	NA	NA	NA	NA	NA	0.959	NA
SE	Trnau1ap:chr4:132319454-132319574:132321688-132321810:132325207-132325260:-	chr4:132321688-132321810	NA	NA	NA	NA	NA	NA	0.937	0.902	NA	NA	NA	0.903	NA	0.958	0.973	NA	0.972	0.975	NA	NA	NA	0.979	0.959	0.969
SE	Mgrn1:chr16:4916104-4916154:4918865-4918913:4920312-4920381:+	chr16:4918865-4918913	NA	NA	NA	NA	NA	NA	NA	NA	NA	NA	NA	NA	NA	NA	NA	NA	NA	NA	0.988	NA	NA	NA	NA	NA
A3SS	Jam2:chr16:84818759-84818775:84818757-84818775:84816265-84816373:+	chr16:84818757-84818759	NA	NA	0.01	NA	NA	NA	NA	NA	NA	NA	NA	NA	NA	NA	NA	NA	NA	NA	NA	NA	NA	0.008	NA	NA
SE	Trnau1ap:chr4:132325351-132325489:132325945-132326045:132329352-132329482:-	chr4:132325945-132326045	NA	NA	NA	NA	NA	0.818	NA	NA	NA	NA	NA	NA	NA	NA	NA	NA	NA	NA	NA	NA	NA	NA	NA	NA
SE	Eya4:chr10:23116819-23116878:23123851-23123941:23138190-23138274:-	chr10:23123851-23123941	NA	NA	NA	0.957	NA	NA	NA	NA	NA	NA	NA	NA	NA	NA	NA	NA	NA	NA	NA	NA	NA	NA	NA	NA
SE	Ptprk:chr10:28560004-28560165:28562106-28562142:28565095-28565436:+	chr10:28562106-28562142	0.617	NA	NA	NA	NA	NA	NA	NA	NA	0.707	NA	NA	NA	NA	NA	NA	NA	NA	NA	NA	NA	NA	NA	NA
SE	Cog7:chr7:121930529-121930613:121932052-121932201:121935657-121935798:-	chr7:121932052-121932201	NA	NA	0.009	NA	0.009	NA	NA	NA	NA	NA	0.013	NA	0.024	NA	NA	NA	NA	0.007	0.013	NA	NA	NA	NA	NA
SE	Afg3l2:chr18:67428980-67429254:67431653-67431778:67434154-67434229:-	chr18:67431653-67431778	NA	0.993	0.987	NA	NA	NA	0.979	0.987	NA	0.961	0.984	NA	NA	NA	NA	NA	0.993	0.987	NA	0.983	0.994	0.994	0.978	NA
A5SS	Ppp1r9a:chr6:5154008-5154207:5154008-5154318:5156120-5156240:+	chr6:5154207-5154318	0.125	NA	NA	0.667	0.06	NA	0.223	NA	0.301	NA	NA	NA	NA	NA	NA	NA	NA	0.364	NA	NA	NA	NA	NA	NA
SE	Serpina3g:chr12:104236251-104236318:104237795-104238344:104239034-104239308:+	chr12:104237795-104238344	NA	NA	0.562	NA	NA	NA	NA	NA	0.39	NA	NA	NA	NA	NA	NA	NA	NA	NA	NA	NA	0.658	NA	NA	NA
SE	Map4:chr9:110027678-110027792:110032098-110032233:110034372-110035506:+	chr9:110032098-110032233	0.988	0.997	0.994	0.997	0.992	0.995	0.993	0.995	0.997	NA	0.969	0.992	0.996	0.991	NA	NA	0.997	NA	0.99	NA	NA	0.956	0.989	0.984
SE	Tprkb:chr6:85924359-85924522:85927258-85927363:85927807-85927891:+	chr6:85927258-85927363	NA	NA	NA	NA	NA	NA	NA	NA	NA	NA	NA	NA	NA	NA	0.978	NA	NA	NA	0.853	NA	NA	NA	NA	NA
SE	Nomo1:chr7:46045848-46045986:46046908-46046998:46050269-46050375:+	chr7:46046908-46046998	NA	NA	0.995	NA	NA	NA	NA	NA	NA	NA	NA	NA	NA	NA	NA	NA	NA	NA	NA	NA	NA	NA	NA	NA
SE	Tgfbr3:chr5:107177804-107177942:107214892-107215077:107266193-107266350:-	chr5:107214892-107215077	NA	0.966	NA	0.992	0.997	NA	0.997	NA	NA	NA	NA	NA	NA	NA	NA	NA	NA	NA	0.967	NA	NA	NA	NA	NA
SE	Zfand5:chr19:21276977-21277089:21279624-21279750:21280422-21280433:+	chr19:21279624-21279750	NA	NA	NA	0.992	NA	NA	NA	NA	0.983	NA	NA	NA	NA	NA	NA	NA	NA	NA	NA	NA	NA	NA	NA	NA
SE	Zkscan1:chr5:138093991-138094139:138097066-138097158:138100589-138107822:+	chr5:138097066-138097158	NA	0.65	NA	NA	0.84	NA	NA	NA	NA	NA	NA	NA	NA	NA	NA	NA	NA	0.764	NA	NA	NA	NA	NA	NA
A5SS	Racgap1:chr15:99643421-99643523:99643392-99643523:99642882-99642971:-	chr15:99643392-99643421	NA	0.626	NA	NA	NA	NA	NA	NA	NA	0.893	NA	NA	0.77	NA	NA	NA	NA	NA	NA	0.626	NA	NA	0.959	NA
SE	Gas5:chr1:161035167-161035194:161035751-161036014:161036819-161036852:+	chr1:161035751-161036014	NA	NA	NA	NA	NA	NA	NA	NA	NA	NA	NA	NA	NA	NA	NA	NA	NA	0.644	NA	NA	NA	NA	NA	NA
SE	Rcbtb2:chr14:73142536-73142593:73154314-73154408:73154830-73154894:+	chr14:73154314-73154408	NA	NA	NA	NA	NA	0.974	NA	NA	NA	NA	NA	NA	NA	NA	NA	NA	NA	NA	NA	NA	NA	NA	NA	NA
SE	Sept9:chr11:117232284-117232719:117290397-117291036:117351428-117351620:+	chr11:117290397-117291036	NA	NA	0.991	NA	NA	NA	NA	0.977	NA	NA	NA	NA	NA	NA	NA	NA	0.995	NA	0.969	NA	NA	0.995	NA	0.996
SE	Zdhhc20:chr14:57832702-57836646:57837590-57837667:57839089-57839205:-	chr14:57837590-57837667	0.851	0.816	0.835	0.608	0.701	0.767	0.615	0.566	0.848	0.795	0.88	0.771	0.695	0.701	0.761	0.828	0.892	0.753	0.976	0.854	0.893	0.836	0.648	0.835
A3SS	Aptx:chr4:40695376-40695418:40695376-40695423:40697216-40697353:-	chr4:40695418-40695423	0.732	0.713	0.787	0.74	0.744	0.645	0.736	0.688	0.912	0.811	0.831	0.824	0.696	0.687	0.874	0.326	0.755	0.772	0.765	0.716	0.649	0.785	0.841	0.689
SE	Ust:chr10:8298055-8298209:8307407-8307487:8330067-8330223:-	chr10:8307407-8307487	NA	NA	NA	NA	NA	NA	NA	NA	NA	0.98	NA	NA	NA	NA	NA	NA	NA	NA	NA	NA	NA	NA	NA	NA
SE	Elmo2:chr2:165308912-165309064:165310174-165310268:165311622-165311752:-	chr2:165310174-165310268	NA	NA	NA	NA	NA	NA	NA	NA	NA	NA	NA	NA	NA	NA	0.99	NA	NA	0.964	NA	NA	NA	NA	NA	0.991
SE	Bloc1s5:chr13:38619089-38619219:38630992-38631075:38634935-38635061:-	chr13:38630992-38631075	NA	NA	NA	NA	NA	NA	0.955	NA	NA	NA	NA	NA	NA	NA	NA	NA	NA	NA	NA	NA	NA	NA	NA	NA
SE	Ikbip:chr10:91083105-91083296:91083754-91083888:91093138-91093231:+	chr10:91083754-91083888	NA	NA	0.001	NA	NA	NA	NA	NA	NA	NA	NA	NA	NA	NA	NA	NA	NA	NA	NA	NA	NA	NA	NA	NA
A5SS	Evc:chr5:37300811-37300923:37300734-37300923:37299721-37300461:-	chr5:37300734-37300811	NA	NA	NA	0.159	NA	NA	0.283	NA	NA	NA	NA	NA	NA	NA	NA	NA	NA	NA	NA	NA	NA	NA	NA	0.298
SE	Tsr1:chr11:74903819-74904013:74904828-74904991:74905205-74905316:+	chr11:74904828-74904991	NA	NA	NA	NA	NA	NA	NA	NA	NA	NA	NA	NA	NA	NA	NA	NA	NA	NA	NA	NA	NA	NA	0.968	NA
SE	Pak2:chr16:32023088-32023285:32027711-32027811:32031583-32031701:-	chr16:32027711-32027811	0.984	0.986	NA	NA	0.991	NA	NA	NA	0.98	0.985	NA	NA	NA	NA	NA	NA	0.977	NA	NA	NA	NA	NA	NA	0.983
SE	Glo1:chr17:30596373-30596463:30596710-30597642:30597804-30597872:-	chr17:30596710-30597642	0.017	0.001	NA	0.005	0.002	0.005	0.008	0.006	0.008	0.003	0.008	0.008	0.008	0.001	NA	0.001	0.004	0.004	0.002	0.008	0.005	0.003	0.005	0.003
SE	Ndufs1:chr1:63172153-63172257:63175636-63175688:63176585-63176822:-	chr1:63175636-63175688	NA	NA	NA	NA	0.02	NA	0.107	NA	NA	NA	NA	0.09	NA	NA	NA	NA	NA	NA	NA	NA	NA	0.054	NA	NA
SE	Ivns1abp:chr1:151350980-151351109:151351553-151351723:151351829-151351905:+	chr1:151351553-151351723	NA	NA	NA	NA	NA	NA	NA	NA	NA	NA	NA	NA	NA	NA	0.982	NA	NA	NA	NA	NA	NA	NA	NA	NA
SE	Tiam2:chr17:3512846-3512955:3513390-3513449:3514670-3514776:+	chr17:3513390-3513449	0.949	NA	NA	NA	NA	NA	NA	NA	NA	0.968	NA	NA	NA	NA	NA	NA	NA	NA	NA	NA	NA	NA	0.926	NA
SE	Ten1:chr11:116198854-116198983:116204844-116204979:116214838-116215318:+	chr11:116204844-116204979	NA	NA	NA	NA	NA	NA	NA	NA	NA	NA	NA	NA	NA	NA	NA	NA	0.922	NA	NA	NA	NA	0.917	NA	NA
RI	Hirip3:chr7:126862599-126862720:126862599-126862926:126862817-126862926:+	chr7:126862720-126862817	0.178	0.097	0.132	0.082	0.18	0.218	0.176	0.248	0.112	0.312	0.185	0.24	0.502	0.272	0.331	0.625	0.232	0.128	0.331	0.084	0.033	0.232	0.244	0.05
SE	Hace1:chr10:45671131-45671200:45671438-45671526:45672327-45672439:+	chr10:45671438-45671526	NA	NA	NA	NA	NA	NA	NA	NA	NA	NA	NA	NA	NA	NA	NA	NA	0.815	NA	NA	NA	NA	NA	NA	NA
SE	Rapgef1:chr2:29619719-29620063:29686104-29686283:29689106-29689263:+	chr2:29686104-29686283	NA	0.994	0.984	NA	NA	NA	NA	NA	NA	NA	NA	NA	NA	NA	0.988	NA	NA	NA	NA	0.953	NA	0.99	NA	NA
SE	Rftn2:chr1:55206335-55206615:55211149-55211261:55226120-55226782:-	chr1:55211149-55211261	NA	NA	NA	NA	0.965	0.879	0.923	NA	0.774	NA	0.963	NA	NA	NA	NA	NA	NA	NA	NA	NA	NA	NA	0.78	NA
SE	Plag1:chr4:3908905-3909002:3912419-3912511:3915620-3915725:-	chr4:3912419-3912511	NA	0.382	NA	NA	NA	NA	NA	0.236	NA	0.382	0.507	0.382	0.382	NA	0.382	NA	0.11	NA	0.553	NA	0.436	NA	0.52	NA
RI	Apeh:chr9:108091242-108091303:108091242-108091889:108091767-108091889:-	chr9:108091303-108091767	0.039	0.029	0.054	0.038	0.021	0.052	0.027	0.059	0.018	0.022	0.081	0.067	0.025	0.028	0.035	0.035	0.037	0.06	0.054	0.065	0.056	0.039	0.015	0.028
SE	Dhx35:chr2:158831661-158831872:158834869-158834994:158836640-158836695:+	chr2:158834869-158834994	NA	NA	NA	NA	NA	NA	NA	NA	NA	NA	NA	NA	NA	NA	NA	NA	NA	NA	NA	NA	NA	NA	0.887	NA
SE	Dync1li2:chr8:104440500-104440590:104440700-104440854:104442473-104442547:-	chr8:104440700-104440854	NA	NA	NA	NA	NA	0.003	NA	NA	NA	NA	NA	NA	NA	NA	NA	NA	NA	NA	NA	NA	NA	0.002	NA	NA
A5SS	Sfswap:chr5:129503982-129504105:129503982-129504152:129504762-129504894:+	chr5:129504105-129504152	0.778	0.647	0.67	0.685	0.66	0.82	0.702	0.763	0.713	0.818	0.673	0.797	0.846	0.814	0.695	NA	0.658	0.747	0.653	0.783	0.526	0.834	0.67	0.888
SE	Oas1c:chr5:120805403-120805600:120806295-120806405:120807959-120808248:-	chr5:120806295-120806405	NA	NA	NA	NA	NA	NA	NA	NA	0.365	NA	NA	0.365	0.187	NA	NA	NA	NA	NA	NA	NA	NA	NA	0.087	NA
SE	Pip5k1c:chr10:81314991-81315118:81315878-81315956:81317325-81317403:+	chr10:81315878-81315956	NA	NA	0.076	NA	NA	NA	NA	NA	0.158	NA	NA	NA	NA	0.396	0.104	NA	NA	0.141	NA	0.18	NA	0.028	NA	NA
A5SS	Dleu2:chr14:61648617-61648822:61648481-61648822:61643963-61644059:-	chr14:61648481-61648617	NA	NA	0.816	NA	NA	NA	NA	NA	NA	NA	NA	NA	NA	NA	NA	NA	NA	NA	NA	NA	NA	NA	NA	NA
SE	Epb41l1:chr2:156510732-156510881:156511784-156511820:156514027-156514210:+	chr2:156511784-156511820	0.047	0.028	0.024	0.044	0.073	0.066	0.08	NA	0.071	0.063	0.105	NA	NA	0.019	0.038	NA	0.021	0.007	0.06	0.009	0.033	0.023	0.013	0.025
SE	Brf1:chr12:112979684-112979757:112983026-112983058:112983732-112983849:-	chr12:112983026-112983058	0.781	0.767	0.564	0.945	0.32	0.553	0.767	NA	0.892	0.875	0.843	0.758	NA	0.658	NA	NA	0.943	NA	NA	0.892	NA	NA	NA	NA
A5SS	Zfand3:chr17:30135322-30135505:30135322-30135659:30153302-30153368:+	chr17:30135505-30135659	NA	NA	NA	NA	NA	0.017	NA	NA	NA	NA	NA	NA	NA	NA	NA	NA	NA	NA	NA	NA	0.026	NA	NA	NA
SE	Dram2:chr3:106547797-106547920:106552155-106552280:106561748-106561816:+	chr3:106552155-106552280	0.919	NA	0.713	0.95	NA	NA	0.872	NA	NA	NA	NA	0.845	NA	NA	0.792	NA	NA	0.951	NA	0.822	0.83	NA	NA	NA
A5SS	Tada2a:chr11:84085675-84085771:84085638-84085771:84084713-84084757:-	chr11:84085638-84085675	NA	NA	0.98	NA	0.932	NA	0.966	0.929	0.966	NA	0.952	0.918	NA	NA	0.916	NA	0.956	0.921	0.945	0.98	NA	NA	NA	NA
SE	Abi3bp:chr16:56624502-56624562:56627559-56627673:56642488-56642560:+	chr16:56627559-56627673	NA	NA	NA	NA	NA	NA	NA	NA	NA	0.245	NA	NA	NA	NA	NA	NA	NA	NA	NA	NA	NA	NA	NA	NA
SE	Sorbs1:chr19:40402257-40402310:40451313-40451398:40513670-40513704:-	chr19:40451313-40451398	NA	NA	0.991	NA	NA	NA	NA	0.984	NA	NA	NA	NA	NA	0.984	NA	NA	0.984	NA	NA	NA	0.991	0.984	NA	NA
SE	Gpr137b:chr13:13357619-13359423:13361297-13361422:13363443-13363572:-	chr13:13361297-13361422	NA	NA	NA	NA	NA	NA	NA	NA	NA	NA	NA	NA	NA	NA	NA	NA	NA	0.924	NA	0.949	NA	NA	NA	NA
SE	Psmc6:chr14:45337477-45337565:45340629-45340691:45340772-45340851:+	chr14:45340629-45340691	NA	NA	NA	NA	NA	NA	NA	NA	NA	NA	NA	NA	NA	NA	NA	NA	NA	NA	0.988	NA	NA	NA	NA	NA
SE	Vegfd:chrX:164385803-164386029:164394432-164394581:164395932-164396033:+	chrX:164394432-164394581	NA	NA	NA	NA	NA	NA	NA	NA	NA	NA	NA	NA	NA	NA	NA	NA	NA	NA	NA	NA	0.993	NA	NA	NA
SE	Rtel1:chr2:181354352-181354442:181355008-181355125:181355327-181355552:+	chr2:181355008-181355125	0.902	0.936	0.86	0.716	0.716	0.87	0.818	0.936	0.599	NA	NA	NA	NA	0.596	0.86	NA	0.771	NA	NA	0.737	NA	NA	NA	0.785
SE	Slc37a3:chr6:39366888-39367046:39367643-39367766:39372078-39372137:-	chr6:39367643-39367766	NA	0.354	0.434	0.354	0.422	0.109	0.215	NA	0.354	0.868	0.354	0.225	0.657	0.215	NA	NA	0.434	0.523	0.673	0.489	0.657	0.19	0.43	NA
SE	Ndrg4:chr8:95706928-95706989:95708607-95708694:95708776-95708833:+	chr8:95708607-95708694	0.881	NA	NA	NA	NA	NA	NA	NA	NA	NA	NA	NA	NA	NA	NA	NA	NA	NA	NA	NA	NA	NA	NA	NA
A3SS	Syngap1:chr17:26966882-26966972:26966869-26966972:26964826-26965038:+	chr17:26966869-26966882	0.295	0.599	0.431	0.401	0.315	0.479	0.36	0.29	0.43	0.539	0.58	0.347	0.546	0.491	0.749	NA	0.429	0.448	0.455	0.3	0.666	0.388	0.249	0.617
SE	Il17rc:chr6:113474160-113474272:113474552-113474597:113476398-113476538:+	chr6:113474552-113474597	0.885	0.843	0.899	0.787	0.909	0.735	0.824	0.551	0.869	0.793	0.964	0.76	0.84	0.837	0.847	NA	0.782	0.918	0.85	0.746	0.824	0.723	0.915	0.84
SE	Tia1:chr6:86418877-86418932:86419100-86419133:86419693-86419794:+	chr6:86419100-86419133	NA	NA	NA	NA	NA	NA	NA	0.92	NA	NA	NA	NA	NA	NA	NA	NA	NA	NA	NA	NA	NA	NA	NA	NA
SE	Eif4g3:chr4:138097244-138097359:138103314-138103412:138105313-138105419:+	chr4:138103314-138103412	0.932	0.973	0.945	0.978	0.931	0.951	0.975	0.875	0.915	0.947	0.915	0.951	0.941	0.979	0.951	NA	0.967	0.981	0.94	0.964	0.966	0.987	0.893	0.956
SE	D330041H03Rik:chr17:24412466-24412574:24413504-24413928:24414311-24414399:-	chr17:24413504-24413928	NA	NA	NA	NA	0.883	NA	NA	NA	NA	0.51	NA	NA	0.438	NA	NA	NA	NA	NA	NA	NA	NA	NA	NA	NA
RI	Fam129c:chr8:71604927-71605035:71604927-71605718:71605606-71605718:+	chr8:71605035-71605606	0.271	0.383	NA	0.408	0.383	0.651	0.383	NA	NA	NA	0.743	NA	0.171	NA	NA	NA	NA	0.249	NA	0.275	NA	0.121	0.194	0.623
SE	Gdpd5:chr7:99387009-99387188:99410408-99410491:99424052-99424124:+	chr7:99410408-99410491	NA	NA	NA	NA	NA	NA	NA	NA	NA	NA	NA	NA	NA	NA	NA	NA	NA	NA	NA	NA	NA	NA	NA	0.954
SE	Kif21a:chr15:90943764-90943901:90952710-90952818:90956294-90956509:-	chr15:90952710-90952818	NA	NA	NA	NA	NA	NA	0.823	NA	NA	NA	NA	NA	NA	NA	NA	NA	NA	NA	NA	NA	NA	NA	NA	0.592
SE	Rnf2:chr1:151478536-151478625:151480954-151481139:151500718-151500794:-	chr1:151480954-151481139	NA	NA	NA	NA	NA	NA	NA	NA	NA	NA	0.014	NA	NA	NA	NA	NA	NA	NA	NA	0.017	NA	NA	NA	NA
SE	Gabbr1:chr17:37064659-37064737:37067213-37067364:37067775-37067908:+	chr17:37067213-37067364	0.04	0.166	0.233	0.068	0.09	0.192	0.033	0.046	0.06	0.142	0.093	0.068	0.155	0.108	0.21	0.378	0.294	0.16	0.46	0.19	0.101	0.37	0.219	0.346
SE	Lamp1:chr8:13159160-13159434:13165848-13165967:13167157-13167377:+	chr8:13165848-13165967	NA	0.998	0.998	0.995	0.995	0.999	0.997	0.999	0.999	0.991	0.997	0.999	0.998	0.998	0.998	0.996	0.999	0.988	0.996	0.999	0.995	0.996	0.999	1
SE	Xbp1:chr11:5523332-5523467:5524238-5524384:5524684-5524943:+	chr11:5524238-5524384	NA	NA	NA	NA	NA	NA	NA	NA	NA	NA	NA	NA	NA	NA	NA	NA	NA	NA	NA	NA	0.998	NA	NA	NA
RI	Hdac6:chrX:7938385-7938492:7938385-7939665:7939442-7939665:-	chrX:7938492-7939442	0.112	0.069	0.123	0.126	0.155	0.137	0.122	0.086	0.095	0.039	0.081	0.055	0.211	0.104	0.103	0.237	0.085	0.222	0.101	0.123	0.077	0.096	0.033	0.117
SE	Rdh13:chr7:4444202-4444321:4444977-4445122:4445446-4445642:-	chr7:4444977-4445122	0.12	0.053	0.048	0.239	0.194	0.078	0.123	0.107	0.233	NA	NA	0.112	NA	0.116	0.038	NA	0.106	0.112	NA	0.226	0.149	0.011	0.078	0.014
A5SS	Pofut2:chr10:77265835-77265961:77265835-77266032:77266912-77267093:+	chr10:77265961-77266032	0.028	0.015	0.032	0.023	0.046	0.013	0.055	0.015	0.037	0.037	0.03	0.014	0.005	0.016	0.035	NA	0.013	0.039	0.011	0.01	0.018	0.012	0.029	0.013
A5SS	Snrnp70:chr7:45392078-45392133:45392073-45392133:45387388-45387453:-	chr7:45392073-45392078	0.023	0.037	0.06	0.039	0.03	0.067	0.035	0.022	0.036	0.049	0.045	0.061	NA	0.047	0.029	0.008	0.045	0.029	0.035	0.051	0.047	0.056	0.032	0.046
SE	Hectd2os:chr19:36625222-36625345:36685526-36685667:36689238-36689273:-	chr19:36685526-36685667	NA	NA	NA	0.925	NA	NA	NA	NA	NA	NA	NA	NA	NA	NA	NA	NA	NA	NA	NA	NA	NA	NA	NA	NA
SE	Uckl1:chr2:181570499-181570598:181572469-181572486:181573073-181573135:-	chr2:181572469-181572486	0.889	0.856	0.903	0.878	0.916	0.831	0.805	0.891	0.951	0.968	0.923	0.925	0.922	0.865	0.937	0.957	0.94	0.894	NA	0.823	0.741	0.942	0.849	0.982
SE	Orai2:chr5:136161486-136161724:136167824-136167887:136168365-136168474:-	chr5:136167824-136167887	NA	0.105	NA	NA	NA	NA	NA	NA	NA	NA	NA	NA	NA	NA	NA	NA	NA	NA	NA	0.413	NA	0.105	0.149	NA
SE	Zranb2:chr3:157541699-157543244:157544963-157545122:157546674-157546803:+	chr3:157544963-157545122	NA	NA	NA	NA	NA	0.994	NA	0.994	NA	NA	NA	NA	NA	0.98	NA	NA	NA	NA	NA	NA	NA	NA	NA	NA
SE	Slc10a7:chr8:78698519-78698571:78706874-78706948:78710316-78712757:+	chr8:78706874-78706948	NA	NA	NA	NA	0.919	NA	NA	0.903	NA	NA	NA	NA	NA	NA	NA	NA	NA	NA	NA	NA	NA	NA	NA	NA
SE	Lrrc49:chr9:60621568-60621716:60649479-60649541:60666288-60666432:-	chr9:60649479-60649541	0.911	0.961	0.975	NA	NA	NA	NA	NA	NA	0.953	NA	NA	NA	0.923	0.97	NA	NA	NA	NA	NA	NA	NA	NA	0.973
SE	Nup133:chr8:123904551-123904616:123906213-123906294:123907755-123907874:-	chr8:123906213-123906294	NA	NA	NA	NA	NA	NA	NA	NA	NA	NA	NA	NA	NA	0.969	NA	NA	NA	NA	NA	NA	NA	NA	NA	NA
SE	Tarbp2:chr15:102518191-102518602:102519121-102519291:102521120-102521213:+	chr15:102519121-102519291	NA	0.949	NA	0.907	0.957	0.96	NA	0.824	0.954	NA	NA	0.971	NA	NA	NA	NA	NA	NA	NA	NA	NA	0.956	NA	0.921
SE	Racgap1:chr15:99639613-99639819:99642882-99642967:99651506-99651569:-	chr15:99642882-99642967	NA	NA	NA	NA	NA	NA	NA	NA	NA	NA	NA	NA	NA	NA	NA	NA	NA	NA	NA	NA	0.805	NA	NA	NA
SE	Rnf213:chr11:119479863-119479947:119480750-119480931:119481145-119481347:+	chr11:119480750-119480931	NA	NA	NA	NA	NA	NA	NA	0.983	NA	NA	NA	NA	NA	NA	NA	NA	NA	NA	NA	NA	NA	NA	NA	NA
SE	Nipa2:chr7:55941950-55943036:55944480-55944709:55962199-55962439:-	chr7:55944480-55944709	NA	NA	NA	NA	NA	NA	NA	NA	NA	NA	NA	NA	NA	NA	NA	NA	NA	NA	NA	NA	NA	0.987	NA	NA
SE	Vdac1:chr11:52385582-52385733:52386366-52386471:52387415-52387473:+	chr11:52386366-52386471	NA	0.001	0.002	0.001	0.002	0.005	NA	0.002	NA	NA	0.001	NA	0.003	0.001	0.001	NA	0.002	NA	0.001	NA	0.001	0.004	NA	NA
SE	Usp7:chr16:8695815-8695916:8696676-8696744:8696826-8696919:-	chr16:8696676-8696744	0.989	NA	NA	NA	NA	NA	NA	NA	NA	NA	NA	NA	NA	NA	NA	NA	NA	NA	NA	NA	NA	NA	NA	NA
SE	Mill1:chr7:18262438-18262702:18262927-18263203:18264584-18266092:+	chr7:18262927-18263203	NA	NA	NA	NA	NA	NA	NA	NA	0.483	NA	NA	NA	NA	NA	NA	NA	NA	NA	NA	NA	0.856	NA	NA	NA
SE	Ctsh:chr9:90054266-90054634:90060478-90060510:90062716-90062787:+	chr9:90060478-90060510	NA	0.903	0.685	NA	NA	NA	0.901	NA	0.892	0.955	NA	NA	NA	NA	0.955	NA	0.811	0.827	0.462	NA	NA	0.915	NA	0.883
SE	Mindy3:chr2:12364446-12364519:12386608-12386679:12396178-12396258:-	chr2:12386608-12386679	0.865	0.955	0.834	0.898	0.967	0.924	0.907	0.69	0.836	0.822	0.848	0.974	NA	0.829	0.958	NA	0.983	NA	0.805	NA	0.878	0.937	NA	0.977
SE	Acsl1:chr8:46521267-46521345:46521409-46521487:46524942-46525077:+	chr8:46521409-46521487	NA	NA	NA	NA	NA	NA	NA	NA	NA	NA	0.002	NA	NA	NA	NA	NA	NA	NA	NA	NA	NA	NA	NA	NA
SE	Tsc2:chr17:24595815-24596766:24596854-24596953:24597045-24597137:-	chr17:24596854-24596953	NA	NA	NA	NA	NA	0.986	NA	NA	NA	NA	NA	NA	NA	NA	NA	NA	NA	NA	NA	NA	NA	NA	NA	NA
SE	Fra10ac1:chr19:38188480-38188800:38189828-38189907:38195696-38195735:-	chr19:38189828-38189907	NA	NA	0.949	NA	NA	NA	NA	NA	NA	NA	NA	NA	NA	NA	NA	NA	NA	NA	NA	NA	NA	NA	NA	NA
SE	Pfkl:chr10:78002009-78002087:78005440-78005514:78009598-78009807:-	chr10:78005440-78005514	NA	NA	NA	NA	NA	0.997	NA	NA	NA	NA	NA	NA	NA	NA	NA	NA	NA	NA	NA	NA	NA	NA	0.998	0.985
SE	Cdadc1:chr14:59560895-59560921:59568947-59569008:59573646-59573836:-	chr14:59568947-59569008	NA	NA	NA	NA	NA	NA	NA	0.94	NA	NA	NA	NA	NA	NA	NA	NA	NA	NA	NA	NA	NA	NA	NA	NA
A5SS	Brca2:chr5:150531683-150531733:150531683-150532402:150534592-150534642:+	chr5:150531733-150532402	NA	NA	NA	NA	NA	0.56	NA	NA	0.124	NA	NA	NA	NA	NA	NA	NA	NA	NA	NA	NA	0.646	NA	0.267	NA
A5SS	Ube2n:chr10:95541204-95541378:95541204-95541451:95541637-95541778:+	chr10:95541378-95541451	0.994	0.979	0.965	NA	0.991	0.981	0.993	NA	0.988	0.992	0.969	0.99	0.998	0.994	0.967	0.97	0.967	NA	0.975	0.982	0.976	0.967	NA	0.963
SE	Fbxo11:chr17:88012556-88012686:88014405-88014547:88015398-88015480:-	chr17:88014405-88014547	NA	NA	NA	NA	NA	NA	NA	NA	NA	NA	NA	NA	NA	NA	0.978	NA	NA	NA	NA	NA	NA	NA	NA	NA
SE	Ssc4d:chr5:135960210-135961208:135961888-135961966:135962199-135962327:-	chr5:135961888-135961966	0.724	NA	NA	NA	NA	NA	NA	NA	NA	NA	NA	NA	NA	NA	NA	NA	NA	NA	NA	NA	NA	0.396	NA	NA
SE	Tfg:chr16:56694399-56694489:56697458-56697596:56701068-56701236:-	chr16:56697458-56697596	NA	NA	NA	0.994	NA	NA	NA	NA	NA	NA	NA	NA	NA	NA	0.994	NA	NA	NA	NA	0.997	NA	NA	0.994	NA
SE	Gria1:chr11:57236893-57237004:57237946-57238153:57242748-57243119:+	chr11:57237946-57238153	NA	NA	NA	NA	NA	NA	NA	NA	NA	NA	NA	NA	NA	NA	NA	NA	NA	NA	NA	NA	NA	0.994	NA	NA
SE	Tfdp2:chr9:96196274-96196560:96202130-96202188:96223093-96223198:+	chr9:96202130-96202188	0.979	NA	NA	NA	NA	NA	NA	NA	NA	NA	NA	NA	NA	0.891	NA	NA	NA	NA	NA	NA	NA	NA	NA	NA
SE	Actr8:chr14:29988188-29988342:29988952-29989048:29989659-29989800:+	chr14:29988952-29989048	NA	NA	NA	NA	NA	NA	NA	NA	NA	NA	0.978	NA	0.936	NA	NA	NA	NA	NA	NA	NA	NA	NA	NA	NA
SE	Gng12:chr6:66896430-66896515:66914452-66914510:66943824-66943877:+	chr6:66914452-66914510	NA	NA	NA	NA	NA	NA	NA	NA	NA	NA	NA	NA	NA	0.945	NA	NA	NA	NA	NA	NA	NA	0.988	NA	NA
SE	Prrc2c:chr1:162674102-162674151:162675604-162675841:162676690-162676817:-	chr1:162675604-162675841	0.545	0.425	0.39	0.48	0.595	0.525	0.693	0.576	0.438	0.568	0.602	0.589	0.562	0.501	0.297	0.269	0.402	0.457	0.372	0.659	0.577	0.299	0.47	0.252
SE	Slc9a8:chr2:167451154-167451350:167465340-167465457:167467684-167467699:+	chr2:167465340-167465457	NA	NA	NA	0.963	NA	0.971	NA	NA	NA	NA	NA	0.966	0.858	NA	NA	NA	NA	NA	NA	NA	NA	NA	NA	0.938
SE	Zfp426:chr9:20478132-20478254:20486329-20486437:20492385-20492451:-	chr9:20486329-20486437	0.73	0.806	0.629	0.581	0.813	0.792	0.505	0.917	0.806	0.72	0.628	0.79	0.883	0.674	0.647	0.715	0.739	0.818	0.945	0.744	0.511	0.734	0.596	0.767
SE	Atp7a:chrX:106115236-106118394:106120234-106120438:106121589-106121707:+	chrX:106120234-106120438	NA	NA	NA	NA	NA	NA	NA	NA	NA	NA	NA	NA	NA	NA	0.975	NA	NA	NA	NA	NA	NA	NA	NA	NA
A3SS	Fdps:chr3:89094451-89094529:89094451-89094577:89094859-89094932:-	chr3:89094529-89094577	0.006	0.01	NA	0.01	0.016	0.031	0.033	0.023	0.024	0.008	0.016	0.011	0.057	0.016	0.035	NA	0.031	0.03	0.014	0.039	0.016	0.017	0.018	0.033
SE	Ppp1r14b:chr19:6974967-6975506:6976543-6976627:6976857-6976890:+	chr19:6976543-6976627	NA	NA	NA	NA	NA	NA	NA	NA	NA	NA	NA	NA	NA	0.996	NA	NA	NA	NA	NA	NA	NA	NA	NA	NA
A5SS	Luc7l:chr17:26252965-26253091:26252965-26254388:26255030-26255125:+	chr17:26253091-26254388	0.317	0.245	0.27	0.392	0.482	0.51	0.441	0.505	0.553	0.452	0.488	0.582	0.499	0.426	0.334	0.472	0.289	0.626	0.388	0.418	0.469	0.306	0.46	0.396
SE	Epb41l3:chr17:69210185-69210383:69238344-69238449:69239746-69239789:+	chr17:69238344-69238449	NA	NA	NA	NA	NA	NA	NA	NA	NA	NA	NA	NA	NA	NA	NA	NA	NA	NA	NA	NA	NA	0.995	NA	NA
SE	Ppm1a:chr12:72790632-72790741:72792777-72792835:72793711-72794564:+	chr12:72792777-72792835	NA	NA	NA	NA	NA	NA	NA	NA	NA	NA	NA	NA	NA	NA	NA	NA	0.996	NA	NA	NA	NA	NA	NA	NA
SE	App:chr16:84965669-84965770:84971407-84971461:85013626-85013726:-	chr16:84971407-84971461	NA	0.984	NA	NA	NA	NA	NA	NA	NA	NA	NA	NA	NA	NA	NA	NA	0.995	NA	NA	NA	NA	NA	NA	NA
SE	Sdccag8:chr1:176826198-176826284:176828869-176828983:176831056-176831182:+	chr1:176828869-176828983	NA	0.933	NA	0.97	NA	NA	0.924	NA	NA	NA	NA	NA	NA	NA	NA	NA	0.961	0.956	NA	NA	NA	0.971	NA	NA
A3SS	Necap2:chr4:141073674-141073762:141073674-141073779:141074959-141075060:-	chr4:141073762-141073779	NA	NA	0.994	NA	NA	NA	NA	NA	NA	NA	NA	NA	NA	NA	NA	NA	NA	NA	NA	NA	NA	NA	NA	NA
RI	Zfp326:chr5:105886316-105886428:105886316-105888839:105888433-105888839:+	chr5:105886428-105888433	0.305	0.686	0.424	0.46	0.467	0.319	0.374	0.494	0.318	0.355	0.358	0.419	0.567	0.392	0.39	0.526	0.436	0.525	0.403	0.415	0.436	0.296	0.424	0.326
SE	Cdk12:chr11:98203058-98204410:98210360-98211236:98219073-98219250:+	chr11:98210360-98211236	NA	NA	0.975	NA	NA	NA	NA	NA	NA	NA	NA	NA	NA	NA	NA	NA	NA	NA	NA	NA	NA	NA	NA	NA
RI	Nr1h3:chr2:91190184-91190284:91190184-91190641:91190461-91190641:-	chr2:91190284-91190461	0.063	0.061	0.478	0.098	0.075	NA	0.103	0.116	0.124	0.234	0.15	0.268	0.186	0.103	0.186	NA	NA	0.286	NA	0.108	0.063	NA	0.047	0.533
SE	Parp8:chr13:116893196-116893247:116894635-116895194:116895655-116895781:-	chr13:116894635-116895194	NA	NA	NA	NA	NA	NA	NA	NA	NA	NA	NA	NA	NA	NA	NA	NA	NA	NA	NA	NA	NA	0.973	NA	NA
SE	Atp2b1:chr10:98914405-98914793:98968693-98969124:98979703-98979901:+	chr10:98968693-98969124	NA	NA	NA	NA	0.976	NA	NA	NA	NA	NA	NA	NA	NA	NA	NA	NA	NA	NA	NA	NA	NA	NA	NA	NA
SE	Gstk1:chr6:42249378-42249495:42249838-42249932:42250229-42250319:+	chr6:42249838-42249932	NA	NA	NA	NA	NA	0.971	NA	NA	NA	NA	NA	NA	NA	NA	NA	NA	NA	NA	NA	NA	NA	NA	NA	NA
A3SS	Reps2:chrX:162514278-162514348:162514278-162514351:162518328-162518423:-	chrX:162514348-162514351	NA	NA	NA	NA	NA	NA	0.831	0.495	NA	NA	0.469	NA	NA	NA	NA	NA	NA	NA	NA	NA	0.915	NA	NA	NA
A3SS	Svil:chr18:5114530-5114686:5114507-5114686:5108574-5108708:+	chr18:5114507-5114530	0.152	0.056	0.067	0.069	0.087	0.148	0.095	0.065	0.066	0.122	0.048	0.148	0.156	0.132	0.075	0.138	0.096	0.124	0.227	0.076	0.099	0.062	0.042	0.066
SE	Naa16:chr14:79377367-79377521:79381494-79381629:79387021-79387106:-	chr14:79381494-79381629	NA	NA	NA	NA	NA	0.904	NA	NA	NA	NA	NA	NA	NA	NA	NA	NA	NA	NA	NA	NA	NA	NA	NA	NA
SE	Slc18a1:chr8:69040240-69040374:69040581-69040701:69040977-69041041:-	chr8:69040581-69040701	NA	NA	NA	NA	NA	NA	NA	NA	NA	NA	NA	NA	NA	NA	NA	NA	NA	0.526	NA	NA	NA	NA	NA	NA
SE	Junos:chr4:95147104-95147200:95150119-95150275:95153591-95153635:+	chr4:95150119-95150275	NA	NA	NA	NA	NA	NA	NA	NA	NA	NA	NA	NA	NA	NA	NA	NA	0.328	NA	NA	NA	NA	NA	NA	NA
SE	Col16a1:chr4:130061601-130061637:130061711-130061795:130062056-130062101:+	chr4:130061711-130061795	NA	NA	NA	NA	NA	NA	0.984	NA	NA	NA	NA	NA	NA	NA	NA	NA	NA	NA	NA	NA	NA	NA	NA	NA
SE	Cux2:chr5:121921313-121921361:121924804-121924915:122043769-122043844:-	chr5:121924804-121924915	NA	NA	NA	0.364	NA	NA	NA	NA	NA	NA	NA	NA	NA	NA	NA	0.889	NA	NA	NA	NA	NA	NA	NA	NA
RI	Rxfp1:chr3:79648072-79648291:79648072-79650824:79650413-79650824:-	chr3:79648291-79650413	NA	NA	0.032	0.419	NA	NA	NA	NA	0.371	NA	NA	NA	NA	NA	NA	NA	NA	NA	NA	0.708	0.109	NA	NA	0.419
SE	Plekhg5:chr4:152106905-152107001:152107457-152107508:152107711-152107861:+	chr4:152107457-152107508	NA	NA	NA	NA	0.947	NA	NA	NA	NA	NA	NA	NA	NA	NA	NA	NA	0.953	NA	NA	NA	NA	NA	NA	NA
SE	Senp5:chr16:31968799-31968937:31977598-31977757:31983263-31983311:-	chr16:31977598-31977757	0.943	0.831	0.95	0.813	0.879	0.629	0.867	0.713	0.871	0.879	0.863	0.931	0.645	0.744	0.914	0.675	0.836	0.778	0.592	0.931	0.91	0.744	NA	0.772
RI	Rufy3:chr5:88614940-88615114:88614940-88616579:88616461-88616579:+	chr5:88615114-88616461	NA	NA	0.007	0.038	0.012	0.004	0.031	NA	0.01	NA	NA	0.015	0.015	0.021	0.01	0.047	NA	0.017	NA	0.004	0.017	0.003	0.006	0.02
SE	Lvrn:chr18:46894914-46895052:46900482-46900558:46905215-46907242:+	chr18:46900482-46900558	NA	0.885	NA	NA	NA	NA	NA	NA	NA	NA	NA	NA	NA	NA	NA	NA	NA	NA	NA	NA	NA	NA	NA	NA
SE	Atg4d:chr9:21268250-21268669:21269302-21269427:21270719-21270850:+	chr9:21269302-21269427	NA	0.014	NA	NA	NA	NA	NA	NA	NA	NA	NA	NA	NA	0.052	NA	NA	NA	NA	NA	NA	NA	NA	NA	NA
SE	Art3:chr5:92331840-92331912:92332847-92332982:92388133-92388211:+	chr5:92332847-92332982	0.512	0.173	NA	0.184	0.08	0.116	0.55	0.164	0.786	0.184	0.282	NA	NA	0.512	NA	NA	0.149	0.591	NA	0.273	NA	NA	0.412	0.611
A5SS	Slc35a2:chrX:7892139-7892867:7892139-7893415:7894190-7894464:+	chrX:7892867-7893415	0.421	0.528	0.68	0.4	0.323	0.317	0.394	0.335	0.554	0.275	0.461	0.405	0.49	0.556	0.475	0.523	0.556	0.41	0.608	0.431	0.493	0.528	0.421	0.587
RI	Abtb2:chr2:103716039-103716153:103716039-103718423:103717159-103718423:+	chr2:103716153-103717159	0.07	NA	0.279	0.012	0.024	0.02	0.032	0.035	0.048	0.125	0.083	0.02	0.041	0.049	0.162	NA	NA	0.111	NA	0.079	0.036	0.069	0.052	NA
SE	Slc25a30:chr14:75774994-75775142:75776995-75777126:75786924-75786962:-	chr14:75776995-75777126	NA	NA	NA	NA	NA	0.975	NA	NA	NA	NA	NA	NA	NA	NA	NA	NA	NA	NA	NA	NA	NA	0.943	NA	NA
SE	Smarce1:chr11:99224720-99225142:99228496-99228548:99230401-99230445:-	chr11:99228496-99228548	NA	NA	NA	0.426	NA	NA	NA	NA	NA	NA	NA	NA	NA	NA	NA	NA	NA	NA	NA	NA	NA	NA	NA	NA
SE	Large1:chr8:72859189-72859345:72883207-72883333:72885690-72885803:-	chr8:72883207-72883333	NA	0.978	NA	NA	NA	NA	NA	NA	NA	0.966	NA	NA	NA	NA	NA	NA	NA	NA	NA	NA	NA	NA	0.987	NA
SE	Gm16867:chr14:69363503-69366648:69373012-69373121:69502981-69503320:-	chr14:69373012-69373121	NA	NA	0.852	NA	NA	NA	NA	0.669	NA	NA	NA	NA	NA	NA	NA	NA	0.591	NA	NA	NA	NA	NA	NA	NA
SE	Ahcyl1:chr3:107667141-107667220:107667639-107667708:107668066-107668165:-	chr3:107667639-107667708	NA	NA	NA	NA	0.997	NA	NA	NA	NA	NA	NA	NA	NA	NA	NA	NA	NA	NA	NA	NA	NA	NA	NA	NA
SE	Lig1:chr7:13305909-13306055:13306212-13306295:13307518-13307671:+	chr7:13306212-13306295	NA	NA	0.963	NA	NA	NA	NA	NA	NA	NA	0.658	NA	NA	NA	NA	NA	NA	NA	NA	NA	NA	NA	0.936	NA
A3SS	Gstm1:chr3:108014944-108015118:108014944-108015145:108016327-108016428:-	chr3:108015118-108015145	NA	NA	NA	NA	0.175	0.175	NA	NA	0.297	NA	NA	NA	NA	0.175	0.158	NA	NA	0.133	0.241	0.091	0.124	0.388	0.175	NA
SE	Aco2:chr15:81895169-81895428:81899128-81899221:81903475-81903634:+	chr15:81899128-81899221	NA	NA	NA	NA	NA	NA	0.998	NA	NA	NA	NA	NA	NA	NA	NA	NA	0.998	NA	NA	NA	0.998	NA	NA	0.998
SE	Clk2:chr3:89168694-89168923:89169614-89169702:89170048-89170115:+	chr3:89169614-89169702	0.9	0.6	0.61	0.701	0.669	0.917	0.808	0.57	0.827	0.73	0.467	0.96	0.882	0.925	0.709	0.561	0.601	0.87	0.704	0.707	0.695	0.908	0.772	0.684
SE	Herc4:chr10:63273450-63273672:63274996-63275088:63278334-63278465:+	chr10:63274996-63275088	NA	NA	0.961	NA	NA	NA	NA	NA	0.898	NA	NA	0.982	NA	NA	NA	NA	0.97	0.975	NA	NA	0.983	NA	NA	NA
SE	Fgfr1:chr8:25563373-25563524:25564339-25564484:25566710-25566907:+	chr8:25564339-25564484	0.96	NA	NA	0.98	0.991	0.996	0.935	0.988	NA	0.984	0.933	NA	NA	0.981	NA	NA	0.982	NA	NA	0.993	0.994	NA	0.992	0.99
SE	Abhd5:chr9:122351607-122351839:122365135-122365221:122367888-122368261:+	chr9:122365135-122365221	0.966	0.965	0.84	0.956	0.901	0.87	0.946	0.933	0.966	NA	NA	0.908	NA	0.937	NA	NA	0.962	0.942	NA	0.934	0.986	0.915	0.985	0.981
SE	Trmt44:chr5:35565360-35565544:35566421-35566528:35568760-35568832:-	chr5:35566421-35566528	NA	NA	NA	NA	NA	NA	NA	0.903	0.938	NA	NA	NA	NA	NA	NA	NA	NA	NA	NA	NA	NA	NA	NA	NA
SE	Psap:chr10:60295945-60296002:60299097-60299229:60299463-60299559:+	chr10:60299097-60299229	NA	NA	NA	NA	NA	NA	NA	NA	NA	0.998	NA	NA	NA	NA	NA	NA	NA	NA	NA	NA	NA	NA	NA	NA
SE	Vezt:chr10:93993516-93993666:93994887-93995012:93996837-93997113:-	chr10:93994887-93995012	0.09	0.12	0.266	0.173	0.029	0.023	0.047	0.052	0.175	NA	0.079	0.214	0.093	0.094	0.072	NA	NA	0.064	NA	0.088	0.161	NA	0.116	NA
SE	Patz1:chr11:3293279-3293343:3294455-3294547:3299033-3299205:+	chr11:3294455-3294547	0.186	0.142	0.174	0.446	0.255	0.176	0.269	0.207	0.035	0.045	0.218	0.145	0.156	0.114	0.163	0.095	0.177	0.04	0.14	0.25	0.287	0.215	0.205	0.132
SE	Vmp1:chr11:86607175-86607292:86611341-86611422:86635174-86635306:-	chr11:86611341-86611422	NA	NA	NA	NA	0.984	NA	NA	NA	NA	0.989	NA	NA	NA	NA	NA	NA	NA	NA	NA	NA	NA	NA	0.995	NA
SE	Gtf2ird1:chr5:134395616-134395800:134402110-134402194:134403731-134403821:-	chr5:134402110-134402194	NA	NA	0.97	NA	NA	NA	NA	NA	NA	NA	NA	0.982	NA	NA	NA	NA	NA	NA	NA	NA	NA	NA	NA	NA
A3SS	Ccdc93:chr1:121496983-121497068:121494395-121497068:121492904-121492987:+	chr1:121494395-121496983	NA	NA	NA	NA	NA	NA	NA	NA	NA	NA	NA	0.756	NA	NA	NA	NA	NA	NA	NA	NA	NA	NA	NA	NA
SE	Phtf2:chr5:20807403-20807473:20812940-20812993:20813239-20813296:-	chr5:20812940-20812993	0.087	0.02	NA	NA	NA	NA	NA	NA	0.156	NA	NA	NA	0.247	NA	NA	NA	NA	0.044	NA	0.129	0.08	NA	NA	NA
SE	Zbtb7b:chr3:89380343-89381515:89385661-89385862:89387062-89387671:-	chr3:89385661-89385862	0.369	NA	NA	0.196	0.176	NA	NA	0.176	0.146	NA	0.271	NA	NA	NA	NA	NA	NA	NA	NA	NA	0.362	NA	NA	NA
SE	Bmp1:chr14:70492778-70492895:70494712-70494815:70504681-70504797:-	chr14:70494712-70494815	NA	NA	0.996	NA	NA	NA	NA	0.995	0.988	NA	NA	NA	NA	NA	0.996	NA	0.998	NA	NA	NA	NA	0.99	NA	NA
SE	Stk11ip:chr1:75534171-75534253:75534403-75534474:75535177-75535425:+	chr1:75534403-75534474	NA	NA	NA	NA	NA	NA	NA	0.972	NA	NA	NA	NA	NA	NA	NA	NA	NA	NA	NA	NA	0.978	NA	NA	NA
A3SS	Gpt:chr15:76697321-76697430:76697158-76697430:76696735-76697019:+	chr15:76697158-76697321	NA	NA	NA	NA	0.935	NA	NA	NA	NA	NA	NA	NA	NA	NA	NA	NA	NA	NA	NA	NA	NA	NA	NA	NA
SE	Mindy3:chr2:12397492-12397566:12403997-12404166:12405859-12405920:-	chr2:12403997-12404166	NA	0.33	0.536	NA	NA	0.824	NA	NA	NA	NA	0.307	NA	0.305	NA	NA	NA	NA	0.738	NA	NA	NA	0.501	NA	0.688
SE	Drg1:chr11:3252159-3252282:3252643-3252811:3254511-3254642:-	chr11:3252643-3252811	NA	NA	NA	NA	NA	NA	NA	NA	0.995	NA	NA	NA	NA	0.993	NA	NA	0.995	NA	NA	NA	NA	NA	NA	NA
SE	Slc30a5:chr13:100802647-100803461:100803861-100803990:100806533-100806760:-	chr13:100803861-100803990	NA	NA	0.988	NA	NA	NA	NA	NA	NA	0.982	NA	NA	NA	NA	NA	NA	NA	NA	NA	NA	NA	NA	NA	NA
SE	Chid1:chr7:141496600-141496681:141522608-141522701:141526431-141526467:-	chr7:141522608-141522701	NA	NA	NA	NA	NA	NA	0.975	NA	NA	NA	0.96	0.943	NA	NA	NA	NA	NA	NA	NA	NA	NA	NA	NA	NA
SE	Btbd9:chr17:30228799-30228878:30274853-30274961:30299530-30299720:-	chr17:30274853-30274961	NA	NA	NA	NA	NA	NA	NA	NA	NA	NA	NA	NA	NA	NA	NA	NA	0.834	NA	NA	NA	NA	NA	NA	NA
SE	Cdc7:chr5:106976629-106976712:106979294-106979444:106982963-106983355:+	chr5:106979294-106979444	0.939	0.889	NA	NA	NA	0.84	0.836	NA	0.851	NA	NA	NA	NA	NA	NA	NA	NA	NA	NA	NA	NA	NA	NA	NA
SE	C2cd3:chr7:100372232-100372496:100374263-100374533:100379967-100380125:+	chr7:100374263-100374533	NA	NA	NA	NA	NA	NA	NA	0.939	NA	NA	NA	NA	NA	NA	NA	NA	NA	NA	NA	NA	NA	NA	NA	NA
SE	Rab18:chr18:6765202-6765332:6767643-6767716:6770053-6770109:+	chr18:6767643-6767716	0.002	0.026	0.008	0.014	0.009	0.014	NA	NA	0.015	0.007	0.011	0.003	NA	0.003	0.004	NA	NA	0.002	NA	0.014	0.008	0.004	0.002	NA
SE	Ttyh2:chr11:114710042-114710185:114710810-114710996:114711759-114711838:+	chr11:114710810-114710996	NA	0.96	0.981	NA	NA	NA	NA	NA	NA	NA	NA	NA	NA	NA	NA	NA	0.93	NA	0.955	NA	NA	NA	NA	0.952
SE	Catsperz:chr19:6922423-6922660:6923300-6923599:6924793-6925321:-	chr19:6923300-6923599	NA	NA	NA	0.454	NA	NA	NA	NA	NA	NA	NA	NA	NA	NA	NA	NA	NA	NA	NA	0.143	NA	NA	NA	NA
A5SS	Sec63:chr10:42796205-42797733:42796205-42798855:42801632-42801727:+	chr10:42797733-42798855	0.907	0.921	NA	0.944	NA	NA	0.921	0.964	NA	NA	0.859	NA	NA	NA	NA	0.94	NA	NA	NA	NA	0.924	NA	NA	NA
SE	Rrp9:chr9:106484210-106484356:106484439-106484519:106485076-106485150:+	chr9:106484439-106484519	0.959	NA	NA	NA	NA	NA	NA	NA	NA	0.848	0.92	NA	NA	NA	NA	NA	NA	NA	NA	0.945	NA	NA	0.973	NA
SE	Zfp280d:chr9:72339011-72339048:72339615-72340339:72360285-72360341:+	chr9:72339615-72340339	0.712	0.666	0.832	0.526	0.44	0.315	0.577	0.614	0.712	0.325	0.44	0.644	0.526	0.804	0.477	NA	0.309	0.363	0.506	0.388	0.773	NA	0.599	0.577
RI	Twf2:chr9:106212731-106212836:106212731-106213063:106212937-106213063:+	chr9:106212836-106212937	0.045	0.076	0.075	0.01	0.013	0.017	0.051	0.025	0.018	0.025	0.06	0.017	0.018	0.028	0.023	NA	0.018	0.049	0.072	0.019	0.022	0.044	0.015	0.062
SE	Dcaf6:chr1:165357428-165357546:165371122-165371248:165388657-165388915:-	chr1:165371122-165371248	NA	0.023	0.07	0.107	NA	0.043	NA	0.036	NA	0.032	NA	0.08	0.094	NA	NA	NA	0.04	NA	NA	0.046	0.123	0.035	0.123	NA
SE	Tada2a:chr11:84109953-84110045:84121081-84121188:84126987-84127095:-	chr11:84121081-84121188	NA	NA	NA	NA	NA	NA	NA	NA	NA	NA	NA	NA	NA	NA	NA	NA	NA	NA	NA	NA	NA	0.908	NA	NA
SE	Vps8:chr16:21533062-21533161:21540018-21540108:21543267-21543314:+	chr16:21540018-21540108	NA	NA	NA	NA	NA	NA	NA	NA	NA	NA	NA	NA	0.986	NA	NA	NA	NA	NA	NA	NA	NA	NA	NA	NA
A5SS	Cbll1:chr12:31494590-31494749:31494581-31494749:31492078-31492179:-	chr12:31494581-31494590	0.904	0.865	0.803	0.191	NA	0.93	0.809	0.845	0.817	0.85	0.666	0.79	0.288	0.815	0.947	NA	0.79	NA	0.43	NA	0.459	0.857	0.842	0.815
A5SS	Nabp1:chr1:51478371-51478399:51478300-51478399:51477477-51477616:-	chr1:51478300-51478371	0.704	0.699	0.683	0.789	0.611	0.184	0.709	NA	0.756	0.73	0.856	NA	NA	0.482	0.575	NA	0.826	0.67	0.753	0.796	0.76	0.73	NA	0.896
SE	Slf2:chr19:44934111-44934155:44934932-44935666:44938364-44938419:+	chr19:44934932-44935666	NA	NA	NA	NA	NA	NA	NA	NA	NA	NA	NA	NA	NA	NA	NA	NA	0.955	NA	NA	NA	NA	NA	NA	NA
SE	Mob2:chr7:142016344-142016505:142025829-142025957:142060984-142061064:-	chr7:142025829-142025957	0.103	NA	NA	0.073	0.163	0.036	0.259	0.044	0.121	NA	0.064	0.063	NA	0.012	NA	NA	NA	0.049	NA	0.191	0.177	NA	0.042	NA
SE	Prelid3b:chr2:174465066-174465936:174466725-174466828:174466939-174467010:-	chr2:174466725-174466828	NA	NA	NA	NA	NA	NA	NA	NA	NA	NA	NA	0.993	0.938	NA	NA	NA	NA	NA	0.997	NA	NA	NA	NA	NA
SE	Bmp1:chr14:70505331-70505456:70507452-70507558:70507998-70508177:-	chr14:70507452-70507558	NA	NA	NA	NA	NA	NA	NA	NA	NA	NA	NA	NA	NA	0.994	NA	NA	NA	NA	NA	NA	NA	NA	NA	NA
SE	L3mbtl2:chr15:81675514-81675632:81676257-81676392:81676824-81676913:+	chr15:81676257-81676392	NA	NA	NA	NA	NA	NA	NA	NA	NA	NA	NA	NA	NA	NA	0.945	NA	NA	NA	NA	NA	NA	NA	NA	NA
SE	Tyrobp:chr7:30414503-30414650:30415007-30415074:30415631-30415675:+	chr7:30415007-30415074	NA	NA	NA	NA	NA	NA	NA	NA	NA	NA	NA	NA	0.14	NA	NA	NA	NA	NA	NA	NA	NA	NA	NA	NA
SE	Tpp2:chr1:43968881-43969030:43970400-43970516:43971563-43971732:+	chr1:43970400-43970516	NA	NA	NA	NA	NA	NA	NA	NA	NA	NA	NA	NA	NA	NA	NA	NA	NA	NA	NA	NA	0.979	NA	NA	NA
SE	Ank3:chr10:70004609-70004991:70006802-70006853:70008777-70008864:+	chr10:70006802-70006853	NA	NA	NA	0.427	NA	NA	NA	NA	NA	0.788	NA	NA	0.271	NA	NA	NA	NA	NA	NA	NA	NA	0.199	NA	NA
SE	Lrp10:chr14:54464903-54464948:54465573-54465709:54467459-54467650:+	chr14:54465573-54465709	NA	NA	NA	NA	NA	NA	NA	NA	NA	0.953	NA	NA	NA	NA	NA	NA	NA	NA	NA	NA	NA	NA	NA	NA
SE	Tlk2:chr11:105221185-105221353:105241568-105241661:105246773-105246884:+	chr11:105241568-105241661	0.875	0.857	NA	0.804	0.838	0.613	0.923	0.894	0.915	0.956	0.692	0.814	NA	0.828	0.834	0.552	0.949	0.923	0.821	0.935	0.906	0.961	0.881	0.725
SE	Ube4a:chr9:44935326-44935501:44937632-44937746:44937848-44937949:-	chr9:44937632-44937746	0.987	NA	NA	NA	NA	NA	NA	NA	NA	NA	NA	0.988	NA	NA	NA	NA	NA	NA	NA	NA	NA	NA	0.986	NA
SE	Gm47283:chrY:90785441-90785979:90793295-90793417:90816348-90816433:+	chrY:90793295-90793417	NA	0.996	NA	0.987	0.966	NA	NA	0.965	NA	NA	0.987	0.991	0.911	NA	0.985	NA	NA	NA	0.957	NA	NA	NA	NA	NA
SE	Nagpa:chr16:5201373-5201513:5203340-5203799:5203896-5204012:-	chr16:5203340-5203799	NA	NA	NA	NA	NA	NA	NA	NA	NA	NA	NA	NA	NA	NA	NA	NA	NA	NA	NA	NA	NA	0.904	NA	0.976
SE	Ppp6r2:chr15:89278698-89278784:89279272-89279353:89279719-89279817:+	chr15:89279272-89279353	0.306	0.115	0.211	0.251	0.439	0.418	0.234	0.345	0.434	0.481	0.283	0.673	0.432	0.417	0.216	0.289	0.283	0.351	0.346	0.375	0.417	0.245	0.357	0.193
SE	Hmga2:chr10:120361274-120364296:120374667-120374700:120462663-120462714:-	chr10:120374667-120374700	NA	NA	NA	NA	NA	NA	NA	NA	NA	NA	NA	NA	NA	NA	NA	NA	NA	NA	NA	NA	NA	NA	NA	0.99
SE	Hint2:chr4:43654715-43654820:43654905-43655046:43656358-43656443:-	chr4:43654905-43655046	NA	0.981	NA	NA	NA	NA	NA	NA	NA	NA	NA	NA	NA	NA	0.993	NA	NA	NA	NA	NA	NA	0.994	NA	NA
SE	Sh3bp5:chr14:31379388-31379519:31387718-31387883:31411540-31411669:-	chr14:31387718-31387883	NA	NA	NA	NA	NA	NA	NA	NA	NA	NA	0.976	NA	NA	NA	NA	NA	NA	NA	NA	NA	NA	NA	NA	NA
SE	Nsd2:chr5:33868753-33868878:33871406-33871634:33879057-33879189:+	chr5:33871406-33871634	0.086	0.339	0.323	0.372	0.345	0.264	0.341	0.283	0.283	0.248	0.297	0.351	0.335	0.161	0.441	0.423	0.258	0.218	0.42	0.221	0.234	0.329	0.125	0.292
SE	Nfia:chr4:97772733-97772911:97783081-97783613:98000391-98000466:+	chr4:97783081-97783613	NA	NA	NA	NA	NA	NA	NA	NA	0.98	NA	NA	NA	NA	NA	NA	NA	NA	NA	NA	NA	NA	NA	NA	NA
SE	Nvl:chr1:181136872-181136930:181139070-181139167:181139253-181139306:-	chr1:181139070-181139167	NA	NA	NA	NA	NA	NA	NA	NA	NA	NA	NA	NA	0.985	NA	0.987	NA	NA	NA	NA	NA	NA	NA	NA	NA
SE	Brd9:chr13:73950074-73950207:73951533-73951645:73954544-73954583:+	chr13:73951533-73951645	NA	0.982	NA	NA	NA	0.963	NA	NA	NA	NA	NA	NA	NA	NA	NA	NA	0.978	NA	NA	0.943	NA	NA	NA	NA
SE	Plekha5:chr6:140570105-140570186:140570320-140570470:140572864-140572966:+	chr6:140570320-140570470	NA	NA	NA	NA	NA	NA	NA	0.981	NA	NA	NA	NA	NA	NA	NA	NA	NA	NA	NA	NA	NA	NA	NA	NA
A3SS	Cyb5r1:chr1:134408403-134408487:134407816-134408487:134407573-134407703:+	chr1:134407816-134408403	0.097	0.162	0.177	0.125	0.165	0.177	0.153	0.29	0.156	0.108	0.206	0.214	0.147	0.128	0.167	0.223	0.131	0.162	0.179	0.127	0.204	0.134	0.217	0.166
SE	Proser3:chr7:30543690-30543773:30546124-30546225:30546302-30546427:-	chr7:30546124-30546225	NA	0.781	NA	NA	NA	0.85	0.736	NA	NA	NA	NA	NA	NA	0.945	NA	NA	NA	NA	NA	0.935	NA	NA	NA	NA
SE	Abi1:chr2:22962400-22962501:22963213-22963228:22994522-22994690:-	chr2:22963213-22963228	NA	NA	NA	NA	NA	NA	NA	NA	NA	NA	NA	NA	NA	NA	NA	NA	0.679	NA	NA	NA	NA	NA	NA	0.864
SE	Htra2:chr6:83052472-83052542:83052697-83052803:83053000-83053070:-	chr6:83052697-83052803	NA	NA	NA	0.972	NA	NA	0.893	NA	0.794	NA	NA	NA	NA	0.919	NA	NA	0.974	NA	NA	NA	NA	0.948	NA	0.879
A3SS	Cnbp:chr6:87845121-87845320:87845121-87845323:87845464-87845557:-	chr6:87845320-87845323	0.278	0.314	0.293	0.299	0.293	0.339	0.292	0.305	0.325	0.344	0.309	0.311	0.321	0.303	0.351	0.299	0.283	0.325	0.316	0.281	0.294	0.335	0.341	0.341
SE	Kiz:chr2:146942916-146942979:146950522-146950588:146952977-146953064:+	chr2:146950522-146950588	NA	0.96	NA	0.982	NA	NA	0.984	NA	NA	0.935	NA	0.983	0.955	0.911	NA	NA	0.988	NA	NA	0.968	0.897	NA	0.955	0.978
SE	Mrpl38:chr11:116134907-116135116:116135190-116135325:116138441-116138621:-	chr11:116135190-116135325	0.993	NA	NA	NA	NA	NA	NA	NA	NA	NA	NA	NA	NA	NA	NA	NA	NA	NA	NA	NA	NA	NA	NA	NA
SE	Eln:chr5:134721616-134721664:134722034-134722079:134722463-134722505:-	chr5:134722034-134722079	NA	NA	NA	NA	NA	NA	NA	NA	NA	NA	NA	NA	NA	NA	NA	NA	NA	NA	NA	0.997	NA	NA	NA	NA
SE	Gmds:chr13:32227214-32227302:32234359-32234397:32338381-32338624:-	chr13:32234359-32234397	NA	NA	NA	NA	0.898	NA	NA	NA	NA	0.799	NA	NA	0.761	NA	NA	NA	NA	NA	NA	NA	NA	0.952	0.77	NA
SE	Sumo1:chr1:59639433-59640268:59642417-59642489:59644516-59644594:-	chr1:59642417-59642489	0.994	NA	NA	NA	NA	0.997	NA	NA	NA	NA	NA	0.997	NA	NA	NA	NA	NA	NA	NA	NA	NA	NA	NA	NA
SE	Prelid3b:chr2:174468297-174468387:174469336-174469505:174472831-174473081:-	chr2:174469336-174469505	NA	0.995	NA	NA	NA	NA	NA	NA	NA	NA	NA	NA	NA	NA	NA	NA	NA	NA	NA	NA	NA	NA	NA	NA
SE	Zmynd11:chr13:9720772-9720932:9722528-9722692:9735331-9735466:-	chr13:9722528-9722692	NA	NA	NA	NA	NA	NA	NA	0.002	NA	NA	NA	NA	NA	NA	NA	NA	NA	NA	NA	NA	0.016	NA	NA	NA
A5SS	Trak1:chr9:121460358-121460577:121460358-121460715:121468984-121469087:+	chr9:121460577-121460715	NA	NA	0.638	0.573	0.509	0.67	0.57	NA	0.546	0.529	0.509	0.634	0.503	NA	NA	NA	NA	NA	NA	0.548	NA	NA	0.562	NA
SE	Upf2:chr2:6027212-6027488:6029361-6029545:6034111-6034251:+	chr2:6029361-6029545	NA	NA	NA	NA	NA	NA	NA	NA	NA	NA	NA	NA	NA	NA	NA	0.955	NA	NA	NA	NA	NA	NA	NA	NA
SE	Hsd17b12:chr2:94083166-94083274:94117429-94117476:94157709-94157909:-	chr2:94117429-94117476	NA	NA	NA	NA	NA	NA	NA	NA	NA	NA	NA	NA	NA	NA	0.967	NA	0.989	NA	NA	NA	NA	0.958	0.94	NA
SE	Ank2:chr3:127056992-127057091:127077501-127077600:127079897-127079996:-	chr3:127077501-127077600	NA	NA	0.944	NA	NA	NA	NA	NA	NA	NA	NA	NA	NA	NA	NA	NA	NA	NA	NA	NA	NA	NA	NA	NA
SE	Srl:chr16:4493778-4493880:4496404-4497715:4522992-4523075:-	chr16:4496404-4497715	0.159	NA	0.229	0.155	0.319	0.142	0.145	NA	0.189	0.207	0.121	0.083	0.131	0.117	0.143	0.095	0.214	0.109	0.228	0.158	0.106	0.208	0.197	0.33
SE	Mindy2:chr9:70626235-70626857:70630995-70631154:70634004-70634069:-	chr9:70630995-70631154	NA	0.967	NA	NA	NA	NA	NA	NA	0.967	0.946	NA	NA	NA	NA	NA	NA	NA	NA	NA	NA	NA	NA	NA	NA
SE	Cpq:chr15:33083257-33083322:33212815-33212999:33249925-33250133:+	chr15:33212815-33212999	NA	NA	NA	NA	NA	0.97	NA	NA	NA	NA	NA	NA	NA	NA	NA	NA	NA	NA	NA	NA	NA	NA	NA	NA
RI	Armcx2:chrX:134807453-134807513:134807453-134807725:134807620-134807725:-	chrX:134807513-134807620	0.101	0.045	0.081	0.169	0.084	0.129	0.073	0.084	0.097	0.057	NA	0.101	0.033	0.078	0.078	NA	0.035	0.157	0.129	0.073	0.054	0.069	0.154	0.034
A3SS	Washc3:chr10:88215982-88216074:88215966-88216074:88213646-88213712:+	chr10:88215966-88215982	NA	NA	NA	0.995	NA	0.995	NA	0.99	NA	0.993	NA	NA	NA	0.996	NA	NA	NA	NA	NA	NA	NA	NA	NA	NA
SE	Pcm1:chr8:41315919-41316054:41321853-41322051:41324954-41325017:+	chr8:41321853-41322051	NA	NA	NA	NA	NA	NA	NA	NA	NA	NA	NA	NA	NA	NA	NA	NA	NA	NA	NA	NA	0.987	NA	NA	NA
A3SS	Gm28042:chr2:120031574-120031651:120031501-120031651:120031306-120031402:+	chr2:120031501-120031574	0.377	0.13	0.265	0.317	0.242	0.28	0.189	0.223	0.082	0.552	0.56	0.087	0.296	NA	0.115	NA	0.262	0.225	0.402	0.219	0.274	0.125	0.369	0.144
SE	Col5a2:chr1:45383166-45383220:45383590-45383698:45384399-45384453:-	chr1:45383590-45383698	NA	NA	NA	NA	NA	NA	NA	NA	NA	NA	NA	NA	0.999	NA	NA	NA	NA	NA	NA	NA	NA	NA	NA	NA
SE	Atp11c:chrX:60292318-60292383:60293606-60293657:60295188-60295292:-	chrX:60293606-60293657	NA	0.961	NA	NA	0.953	NA	NA	NA	NA	NA	NA	NA	NA	NA	NA	NA	NA	NA	NA	NA	NA	NA	NA	NA
SE	Acox1:chr11:116183463-116183624:116189414-116189575:116198221-116198381:-	chr11:116189414-116189575	0.068	0.041	0.03	0.074	0.074	0.04	0.089	0.087	0.058	0.052	0.079	0.03	0.081	0.024	0.042	0.026	0.028	0.05	0.006	0.046	0.056	0.03	0.047	0.019
SE	Hadhb:chr5:30178560-30178719:30178796-30178844:30179551-30179639:+	chr5:30178796-30178844	NA	NA	NA	NA	NA	NA	NA	NA	NA	NA	NA	NA	NA	0.985	NA	NA	NA	NA	NA	NA	NA	NA	NA	NA
SE	Ehbp1l1:chr19:5720808-5720877:5720971-5721007:5721441-5721584:-	chr19:5720971-5721007	0.118	0.141	0.109	0.329	0.007	0.041	0.043	NA	0.236	0.084	0.011	0.06	0.143	0.055	0.203	NA	0.049	0.124	0.241	0.289	0.289	0.063	NA	0.05
SE	Rpl13a:chr7:45126708-45126794:45126990-45127092:45127208-45127274:-	chr7:45126990-45127092	NA	NA	NA	NA	NA	NA	NA	NA	NA	NA	NA	NA	0.999	NA	NA	NA	1	1	NA	NA	NA	NA	NA	1
SE	Aebp1:chr11:5869413-5869610:5869706-5869886:5870075-5870427:+	chr11:5869706-5869886	NA	1	NA	0.998	NA	NA	NA	NA	NA	1	NA	NA	NA	1	NA	NA	1	1	NA	NA	NA	0.999	0.999	NA
SE	Snap47:chr11:59428340-59428813:59437977-59438513:59449914-59449999:-	chr11:59437977-59438513	NA	NA	NA	NA	NA	NA	NA	NA	NA	NA	NA	NA	NA	NA	NA	NA	NA	0.994	NA	0.978	0.982	NA	NA	0.996
SE	Glis3:chr19:28540200-28540408:28665752-28666236:28679595-28679666:-	chr19:28665752-28666236	NA	0.979	NA	NA	NA	NA	NA	NA	NA	NA	NA	NA	NA	NA	NA	NA	NA	0.987	NA	NA	NA	NA	NA	NA
SE	Cenpc1:chr5:86044766-86046580:86047583-86047683:86052170-86052241:-	chr5:86047583-86047683	NA	NA	NA	0.98	NA	NA	NA	NA	NA	NA	NA	NA	NA	NA	NA	NA	NA	NA	NA	NA	NA	NA	NA	NA
SE	Lztr1:chr16:17517455-17517539:17518516-17518574:17519386-17519526:+	chr16:17518516-17518574	NA	0.991	NA	NA	NA	NA	NA	NA	NA	NA	NA	NA	NA	NA	NA	NA	NA	NA	NA	NA	NA	NA	NA	NA
SE	Def8:chr8:123446097-123446184:123447316-123447363:123447787-123447912:+	chr8:123447316-123447363	0.217	0.388	NA	NA	0.202	0.16	NA	0.132	NA	0.29	0.16	NA	NA	0.202	NA	NA	NA	0.178	NA	NA	0.132	NA	0.202	0.336
RI	Capn3:chr2:120502386-120502444:120502386-120502593:120502528-120502593:+	chr2:120502444-120502528	0.561	NA	NA	0.113	NA	NA	NA	NA	0.176	0.096	NA	NA	0.116	0.299	NA	NA	NA	0.317	NA	0.167	0.176	NA	NA	NA
SE	Mindy3:chr2:12386608-12386679:12397492-12397566:12419158-12419288:-	chr2:12397492-12397566	0.053	NA	NA	NA	NA	NA	NA	NA	NA	NA	NA	NA	NA	NA	NA	NA	NA	NA	NA	NA	NA	NA	NA	NA
SE	Slc23a2:chr2:132078412-132078501:132089095-132089253:132091212-132091329:-	chr2:132089095-132089253	NA	NA	NA	NA	NA	NA	NA	NA	NA	NA	0.986	0.922	NA	NA	NA	NA	NA	NA	NA	NA	NA	NA	NA	NA
SE	Nrn1:chr13:36730106-36730251:36734235-36734324:36735027-36735131:-	chr13:36734235-36734324	0.993	NA	NA	NA	NA	NA	NA	NA	NA	NA	NA	NA	NA	NA	NA	NA	NA	NA	NA	NA	NA	NA	NA	NA
A3SS	Eme2:chr17:24894570-24894707:24894570-24894755:24894854-24895059:-	chr17:24894707-24894755	NA	NA	NA	NA	0.669	NA	NA	NA	NA	NA	NA	0.791	NA	NA	NA	NA	NA	NA	NA	NA	NA	0.888	NA	NA
SE	Ephx1:chr1:180994627-180994757:180995948-180996176:180999722-180999903:-	chr1:180995948-180996176	NA	NA	NA	NA	NA	NA	NA	NA	NA	NA	NA	NA	NA	NA	NA	NA	NA	NA	NA	0.998	NA	NA	NA	NA
SE	Zbtb20:chr16:43569680-43569781:43577029-43577193:43577560-43577748:+	chr16:43577029-43577193	0.611	0.779	0.604	0.575	0.667	0.467	0.609	0.633	0.728	0.564	0.653	0.778	0.62	0.491	0.731	0.607	0.598	0.68	0.62	0.413	0.692	0.691	0.68	0.639
A3SS	Srl:chr16:4493778-4493877:4493778-4493880:4541679-4541816:-	chr16:4493877-4493880	NA	0.831	NA	NA	NA	NA	NA	NA	NA	NA	NA	NA	NA	0.831	NA	NA	NA	NA	NA	NA	NA	NA	0.855	NA
SE	Dnttip1:chr2:164763220-164763281:164765160-164765232:164767706-164767762:+	chr2:164765160-164765232	NA	0.976	NA	NA	NA	0.971	NA	0.961	NA	NA	NA	0.963	NA	NA	0.987	NA	NA	NA	NA	NA	NA	0.978	0.973	NA
SE	Flna:chrX:74228759-74228921:74229380-74229509:74229825-74229966:-	chrX:74229380-74229509	NA	NA	NA	NA	NA	NA	NA	0.998	NA	NA	NA	NA	NA	NA	NA	NA	NA	NA	NA	NA	NA	NA	NA	NA
SE	Usp54:chr14:20560845-20562242:20564867-20565063:20565942-20566062:-	chr14:20564867-20565063	NA	NA	NA	0.842	NA	NA	0.951	NA	0.947	NA	NA	NA	NA	0.858	NA	NA	NA	NA	0.812	NA	NA	NA	NA	NA
SE	Snrpb2:chr2:143065175-143065348:143068260-143068401:143069373-143069424:+	chr2:143068260-143068401	NA	NA	NA	NA	NA	NA	NA	NA	NA	NA	NA	NA	NA	NA	NA	NA	NA	NA	NA	0.995	NA	NA	NA	NA
SE	Tab2:chr10:7924684-7924872:7933067-7933208:7955800-7955893:-	chr10:7933067-7933208	0.097	NA	0.068	0.183	0.188	0.102	0.13	0.167	0.16	0.198	0.197	0.133	0.273	0.086	0.048	0.494	0.112	0.137	0.308	0.083	0.119	0.151	0.133	0.057
SE	Tpm1:chr9:67029919-67031098:67031451-67031514:67031950-67032026:-	chr9:67031451-67031514	NA	1	NA	NA	NA	NA	NA	NA	NA	NA	NA	NA	NA	NA	NA	NA	NA	NA	NA	NA	NA	NA	NA	NA
SE	Cfap100:chr6:90417609-90417710:90421208-90421400:90427437-90427543:-	chr6:90421208-90421400	NA	NA	NA	NA	NA	NA	NA	NA	NA	NA	NA	NA	NA	NA	NA	NA	NA	NA	NA	0.859	NA	NA	NA	NA
SE	Arhgef7:chr8:11782524-11782655:11785712-11785914:11791455-11791544:+	chr8:11785712-11785914	0.973	NA	NA	NA	NA	0.986	NA	NA	NA	0.985	NA	NA	NA	NA	0.985	NA	0.971	NA	NA	NA	NA	0.993	NA	0.987
SE	Klhdc1:chr12:69259500-69259613:69263148-69263221:69268241-69268326:+	chr12:69263148-69263221	NA	NA	NA	NA	NA	NA	NA	0.89	NA	NA	NA	NA	NA	NA	NA	NA	NA	0.897	NA	NA	NA	NA	NA	NA
SE	Ccnc:chr4:21732488-21732558:21735416-21735464:21740591-21740647:+	chr4:21735416-21735464	0.901	NA	NA	NA	NA	NA	NA	NA	NA	NA	NA	NA	NA	NA	NA	NA	NA	NA	NA	NA	NA	NA	NA	NA
SE	Polr3b:chr10:84631784-84631860:84632454-84632555:84634900-84634992:+	chr10:84632454-84632555	0.976	NA	NA	NA	NA	NA	NA	NA	NA	NA	NA	NA	NA	NA	NA	NA	NA	NA	NA	NA	NA	0.968	NA	NA
SE	Dhrs13:chr11:78034012-78034136:78034274-78034586:78036861-78037791:+	chr11:78034274-78034586	0.956	NA	0.846	NA	0.853	NA	0.816	NA	NA	NA	NA	NA	NA	NA	NA	NA	NA	0.947	NA	NA	0.868	NA	NA	NA
SE	Ap2a2:chr7:141602232-141602362:141604908-141605010:141609806-141609915:+	chr7:141604908-141605010	NA	NA	NA	NA	NA	NA	NA	NA	NA	NA	NA	NA	NA	NA	NA	NA	NA	0.991	NA	NA	NA	NA	NA	NA
SE	Zswim8:chr14:20711457-20711630:20711790-20711898:20712036-20712118:+	chr14:20711790-20711898	NA	NA	NA	NA	NA	0.968	0.979	0.992	NA	NA	NA	0.986	0.976	NA	NA	NA	NA	0.975	NA	0.985	NA	NA	0.991	0.984
A3SS	Abcd4:chr12:84612324-84612445:84612324-84612896:84613904-84614044:-	chr12:84612445-84612896	NA	0.93	NA	NA	NA	NA	NA	0.799	NA	NA	NA	NA	NA	NA	NA	NA	NA	NA	NA	NA	NA	NA	NA	NA
SE	Pex13:chr11:23655832-23656130:23656385-23656583:23665746-23665842:-	chr11:23656385-23656583	NA	0.043	0.075	0.035	0.088	0.017	0.033	0.121	0.029	NA	0.074	0.02	0.3	0.038	NA	NA	0.125	0.058	0.097	NA	0.059	NA	NA	0.051
SE	Atp6v1f:chr6:29468067-29468167:29468966-29469226:29470066-29470512:+	chr6:29468966-29469226	NA	NA	NA	NA	NA	NA	NA	NA	NA	NA	NA	NA	NA	0.421	NA	NA	NA	NA	NA	NA	NA	NA	NA	NA
SE	Ptdss1:chr13:66976766-66976811:66977630-66977711:66987753-66987853:+	chr13:66977630-66977711	0.012	NA	NA	NA	NA	NA	NA	NA	NA	NA	NA	NA	NA	NA	NA	NA	NA	NA	NA	NA	NA	NA	NA	NA
SE	Rab5if:chr2:156863127-156863417:156865256-156865360:156872337-156872467:+	chr2:156865256-156865360	0.987	0.971	0.983	0.983	0.986	0.981	0.987	0.988	0.968	0.994	0.983	0.986	0.977	0.982	0.981	0.964	0.991	0.974	0.968	0.977	0.99	0.976	0.982	0.985
RI	Ankra2:chr13:98272771-98272852:98272771-98273918:98273377-98273918:+	chr13:98272852-98273377	0.36	0.814	0.738	0.46	0.51	0.502	0.445	0.46	0.405	0.27	0.342	0.415	0.315	0.383	0.439	0.431	0.51	0.529	0.599	0.412	0.491	0.423	0.555	0.568
SE	Ube2q2:chr9:55194844-55195519:55203700-55203767:55205959-55206210:+	chr9:55203700-55203767	NA	NA	NA	NA	NA	NA	NA	NA	NA	0.959	NA	NA	NA	NA	NA	NA	NA	NA	NA	NA	NA	NA	NA	NA
SE	Jarid2:chr13:44840690-44840880:44848279-44848421:44874282-44874314:+	chr13:44848279-44848421	NA	NA	NA	NA	NA	NA	NA	NA	NA	NA	NA	NA	NA	NA	NA	NA	NA	0.843	NA	NA	NA	NA	NA	NA
SE	Col12a1:chr9:79678258-79678378:79678460-79678610:79680292-79680414:-	chr9:79678460-79678610	NA	0.999	NA	NA	NA	NA	NA	NA	NA	NA	NA	NA	NA	NA	0.998	NA	NA	NA	NA	NA	NA	0.999	NA	0.999
SE	Commd4:chr9:57156515-57156555:57156774-57156840:57157066-57157125:-	chr9:57156774-57156840	0.984	NA	0.995	0.96	NA	0.972	0.986	0.993	NA	0.987	0.984	NA	0.988	0.991	NA	NA	0.984	0.975	NA	0.966	NA	NA	0.99	NA
SE	Add3:chr19:53142755-53143089:53216800-53217015:53226590-53226608:+	chr19:53216800-53217015	NA	NA	NA	0.992	NA	NA	NA	NA	0.984	NA	NA	NA	NA	NA	NA	NA	NA	NA	NA	NA	NA	NA	NA	0.989
RI	Uba7:chr9:107981203-107981296:107981203-107981581:107981389-107981581:+	chr9:107981296-107981389	NA	NA	NA	0.246	0.093	0.183	0.226	0.033	0.297	0.023	0.33	NA	NA	0.11	NA	NA	NA	0.155	NA	NA	0.291	NA	0.058	NA
SE	Fxyd3:chr7:31072180-31072213:31073581-31073635:31076620-31076654:-	chr7:31073581-31073635	NA	NA	NA	0.72	0.94	NA	0.928	0.967	0.933	NA	NA	NA	NA	NA	NA	NA	NA	NA	NA	NA	0.824	NA	NA	NA
A3SS	Cit:chr5:115981694-115981812:115981649-115981812:115979761-115979869:+	chr5:115981649-115981694	NA	NA	NA	NA	NA	NA	NA	NA	NA	NA	NA	0.161	0.397	0.606	NA	NA	NA	0.133	0.381	0.506	NA	NA	NA	NA
SE	Mindy3:chr2:12399658-12400137:12401024-12401076:12405859-12405920:-	chr2:12401024-12401076	NA	NA	0.979	NA	NA	0.856	0.901	NA	0.957	0.856	0.733	NA	NA	NA	NA	NA	NA	NA	NA	NA	NA	NA	NA	NA
SE	Syngap1:chr17:26964826-26965038:26966882-26966973:26970498-26970933:+	chr17:26966882-26966973	NA	NA	0.927	NA	NA	NA	NA	NA	NA	NA	NA	NA	NA	NA	NA	NA	NA	NA	NA	NA	NA	NA	NA	NA
SE	Cerkl:chr2:79343216-79343291:79354921-79355064:79368679-79368811:-	chr2:79354921-79355064	NA	NA	NA	NA	NA	NA	NA	NA	NA	0.849	NA	NA	NA	NA	NA	NA	NA	0.915	NA	NA	NA	NA	NA	NA
SE	Foxp1:chr6:99161939-99163029:99260344-99260419:99308343-99308438:-	chr6:99260344-99260419	NA	0.865	NA	NA	NA	NA	NA	NA	NA	NA	NA	NA	NA	NA	0.936	NA	NA	NA	NA	NA	0.963	NA	NA	NA
SE	Hpf1:chr8:60890444-60890536:60893700-60893860:60896737-60896836:+	chr8:60893700-60893860	0.877	0.885	0.851	NA	0.882	NA	NA	0.937	NA	NA	0.952	NA	NA	NA	0.616	NA	0.885	NA	0.8	NA	0.853	0.734	NA	0.917
SE	Tmem234:chr4:129600982-129601134:129601869-129601961:129602221-129602261:+	chr4:129601869-129601961	NA	NA	NA	NA	NA	NA	0.782	NA	NA	NA	NA	NA	NA	NA	NA	NA	NA	NA	NA	NA	NA	NA	NA	NA
A5SS	Enox2:chrX:49286855-49286904:49286844-49286904:49168640-49168784:-	chrX:49286844-49286855	0.554	0.736	0.554	0.482	0.669	0.677	0.482	0.383	0.756	NA	NA	0.563	0.482	0.788	NA	NA	0.432	0.848	NA	0.736	NA	0.924	0.736	0.788
SE	Rusc2:chr4:43383509-43383759:43413004-43413054:43414627-43414755:+	chr4:43413004-43413054	0.13	0.191	0.161	NA	0.2	NA	0.236	NA	NA	0.272	NA	0.49	0.111	0.2	0.134	NA	0.2	NA	0.16	NA	0.272	0.133	0.176	0.185
SE	Dgat1:chr15:76504348-76504369:76504543-76504571:76504665-76504706:-	chr15:76504543-76504571	NA	NA	NA	NA	NA	NA	NA	NA	NA	NA	NA	NA	NA	NA	NA	NA	NA	NA	NA	NA	0.812	NA	NA	NA
SE	Acsl4:chrX:142351378-142351618:142360386-142360436:142390304-142390504:-	chrX:142360386-142360436	NA	0.985	NA	NA	NA	NA	NA	NA	NA	NA	NA	NA	NA	NA	NA	NA	NA	NA	NA	NA	NA	NA	NA	NA
SE	Casd1:chr6:4614648-4614711:4619760-4619884:4624051-4624266:+	chr6:4619760-4619884	NA	NA	NA	0.29	NA	NA	NA	NA	NA	NA	NA	NA	NA	NA	NA	NA	NA	NA	NA	NA	NA	NA	NA	NA
SE	Popdc2:chr16:38362208-38363147:38369483-38369592:38373818-38374194:+	chr16:38369483-38369592	NA	NA	NA	0.963	NA	NA	NA	NA	NA	NA	0.89	NA	NA	NA	NA	NA	NA	NA	NA	0.852	NA	NA	NA	NA
SE	Phf21a:chr2:92351700-92351864:92356863-92357019:92358693-92358769:+	chr2:92356863-92357019	NA	NA	NA	NA	NA	NA	NA	NA	NA	NA	NA	NA	NA	NA	NA	NA	NA	NA	NA	NA	NA	NA	0.982	NA
SE	Zfp646:chr7:127876795-127877212:127877902-127878107:127878569-127880188:+	chr7:127877902-127878107	NA	0.842	0.885	NA	0.94	0.891	NA	0.698	0.962	0.955	0.918	0.918	NA	NA	0.927	NA	0.943	0.908	0.814	0.835	0.975	0.936	0.908	NA
SE	Gtf3c2:chr5:31172781-31173061:31173382-31173511:31173767-31174089:-	chr5:31173382-31173511	0.437	0.5	0.313	0.627	0.513	0.456	0.439	0.764	0.594	0.634	0.535	0.489	0.809	0.505	0.307	NA	0.38	0.724	0.571	0.535	0.56	0.313	0.582	0.542
SE	Pknox2:chr9:36968377-36968486:36987167-36987272:37083206-37083276:-	chr9:36987167-36987272	0.732	NA	NA	0.599	0.841	0.738	0.898	NA	0.949	0.723	0.773	0.48	0.848	0.763	0.662	NA	0.876	0.549	NA	0.792	NA	NA	0.79	0.595
SE	Dglucy:chr12:100867188-100867255:100871303-100871506:100875246-100875399:+	chr12:100871303-100871506	NA	NA	NA	NA	NA	NA	NA	NA	0.884	NA	NA	NA	NA	NA	NA	NA	NA	NA	NA	NA	NA	NA	NA	NA
SE	Emc8:chr8:120658527-120659074:120659958-120660187:120660493-120660670:-	chr8:120659958-120660187	NA	NA	NA	0.626	NA	NA	NA	0.77	NA	0.847	0.879	NA	NA	NA	0.283	NA	NA	NA	NA	NA	NA	NA	0.558	NA
A3SS	Dmpk:chr7:19092546-19092632:19092417-19092632:19091938-19092254:+	chr7:19092417-19092546	0.473	0.412	0.448	0.396	0.3	0.336	0.401	0.45	0.418	0.464	0.349	0.413	0.408	0.408	0.385	NA	0.502	0.552	0.36	0.465	0.407	0.421	0.415	0.501
SE	Ankrd11:chr8:122899978-122900149:122900601-122900698:122908667-122908806:-	chr8:122900601-122900698	0.329	0.173	0.238	0.592	0.45	0.388	0.422	0.483	0.265	0.358	0.312	0.403	0.366	0.34	0.204	0.07	0.138	0.43	0.144	0.502	0.328	0.2	0.358	0.189
RI	Incenp:chr19:9877676-9877796:9877676-9878248:9878127-9878248:-	chr19:9877796-9878127	0.084	0.101	0.084	0.108	0.044	0.145	0.007	0.124	NA	0.046	0.116	0.049	0.237	0.043	0.049	NA	0.017	0.142	0.554	NA	0.134	0.101	0.033	0.07
SE	Clk1:chr1:58414614-58414684:58417012-58417383:58419666-58419733:-	chr1:58417012-58417383	NA	NA	0.991	NA	NA	NA	NA	NA	NA	NA	NA	NA	NA	NA	NA	NA	NA	NA	NA	NA	NA	NA	NA	NA
SE	Parg:chr14:32214566-32214650:32217382-32217438:32217659-32217734:+	chr14:32217382-32217438	0.048	0.058	0.039	NA	NA	NA	NA	NA	NA	NA	NA	NA	NA	NA	0.033	NA	NA	NA	0.087	NA	0.075	NA	0.035	NA
SE	Src:chr2:157424391-157424414:157431609-157431715:157439200-157439277:+	chr2:157431609-157431715	NA	0.028	0.009	NA	NA	0.011	0.015	NA	0.033	NA	NA	NA	0.054	0.085	0.018	NA	0.026	NA	0.296	0.109	NA	0.023	0.028	NA
SE	Ahcy:chr2:155063988-155064076:155064153-155064361:155064813-155064926:-	chr2:155064153-155064361	NA	NA	NA	NA	NA	NA	NA	NA	NA	NA	NA	NA	NA	0.997	NA	NA	NA	NA	NA	NA	NA	0.996	NA	NA
SE	Ampd3:chr7:110803726-110803853:110804824-110804988:110807779-110807953:+	chr7:110804824-110804988	NA	NA	0.997	NA	NA	NA	NA	NA	NA	NA	NA	NA	NA	NA	NA	NA	NA	NA	NA	NA	NA	NA	NA	NA
SE	Slc26a6:chr9:108858430-108858508:108858823-108858919:108859000-108859107:+	chr9:108858823-108858919	NA	NA	NA	NA	0.838	NA	NA	0.895	NA	NA	NA	NA	NA	NA	NA	NA	NA	NA	NA	NA	NA	NA	NA	NA
SE	Rhbdf1:chr11:32212622-32212784:32212867-32212942:32213051-32213163:-	chr11:32212867-32212942	NA	NA	NA	NA	NA	NA	NA	NA	NA	NA	NA	NA	NA	NA	NA	NA	NA	NA	NA	0.974	NA	NA	NA	NA
SE	Wnt5b:chr6:119440281-119440574:119446334-119446582:119448135-119448272:-	chr6:119446334-119446582	NA	NA	NA	NA	NA	NA	NA	NA	NA	NA	NA	NA	NA	NA	NA	NA	NA	NA	NA	NA	NA	NA	0.99	NA
SE	Cryz:chr3:154606378-154606531:154611409-154611573:154613821-154613850:+	chr3:154611409-154611573	NA	NA	NA	NA	NA	NA	NA	NA	NA	NA	NA	NA	NA	NA	NA	NA	NA	0.982	NA	NA	NA	NA	NA	NA
SE	Eri3:chr4:117550364-117550730:117564620-117564898:117582599-117582716:+	chr4:117564620-117564898	0.949	0.889	0.941	0.907	0.951	0.885	NA	0.962	0.921	NA	0.951	0.985	0.995	0.957	0.967	NA	0.939	0.995	NA	0.945	0.976	0.919	0.978	0.986
A3SS	Atg4b:chr1:93778284-93778364:93775627-93778364:93775132-93775234:+	chr1:93775627-93778284	0.942	NA	NA	NA	0.63	NA	NA	NA	NA	0.666	NA	NA	0.93	0.889	NA	NA	NA	NA	NA	NA	NA	0.86	0.939	NA
SE	Zfp120:chr2:150114405-150118200:150119480-150119628:150119824-150119951:-	chr2:150119480-150119628	0.601	0.42	0.715	0.704	0.429	0.819	0.301	0.834	NA	0.751	0.601	0.501	0.401	0.895	0.534	NA	NA	0.616	0.525	0.667	0.356	NA	0.562	0.644
RI	Il11ra1:chr4:41765385-41765552:41765385-41766274:41766110-41766274:+	chr4:41765552-41766110	0.036	0.027	0.027	0.041	0.05	0.042	0.048	0.062	0.037	0.038	0.048	0.053	0.036	0.034	0.022	NA	0.027	0.04	0.032	0.044	0.037	0.019	0.06	0.039
SE	Qsox1:chr1:155783402-155783525:155786793-155786923:155789297-155789432:-	chr1:155786793-155786923	0.996	NA	0.996	0.996	NA	0.987	0.996	0.986	NA	NA	NA	0.997	NA	0.991	0.999	NA	0.994	NA	NA	0.992	NA	0.999	0.992	0.998
A5SS	Psme3:chr11:101319455-101319504:101319455-101319592:101319911-101320024:+	chr11:101319504-101319592	0.021	0.037	0.009	0.024	0.012	0.023	0.022	0.014	0.019	0.037	0.028	0.013	0.022	0.031	0.039	NA	0.021	0.016	0.006	0.019	0.008	0.064	0.031	0.026
SE	Aif1l:chr2:31950462-31950590:31965070-31965112:31969629-31969746:+	chr2:31965070-31965112	0.845	NA	NA	0.94	0.924	NA	0.94	NA	NA	NA	NA	NA	NA	NA	0.977	NA	0.896	NA	0.804	NA	0.896	0.942	NA	0.916
SE	Hdac8:chrX:102499821-102499952:102504398-102504451:102504953-102505081:-	chrX:102504398-102504451	NA	NA	NA	NA	NA	NA	NA	NA	NA	NA	NA	NA	NA	NA	NA	NA	NA	NA	NA	NA	NA	NA	0.984	NA
SE	Cox5b:chr1:36692210-36692284:36692430-36692550:36693196-36693386:+	chr1:36692430-36692550	NA	0.997	0.996	0.994	NA	NA	NA	0.994	0.986	NA	0.995	NA	NA	NA	NA	NA	NA	NA	NA	NA	0.992	NA	NA	0.996
SE	Ppp2r3a:chr9:101194158-101194425:101211130-101213562:101251661-101251795:-	chr9:101211130-101213562	0.93	0.937	0.737	0.959	0.966	0.926	0.934	0.971	0.952	0.969	NA	0.975	NA	NA	NA	NA	0.725	0.88	NA	NA	NA	NA	0.953	NA
SE	Ggps1:chr13:14057795-14057888:14060962-14061007:14063205-14063410:-	chr13:14060962-14061007	NA	NA	NA	NA	NA	NA	NA	NA	NA	NA	NA	NA	NA	NA	NA	NA	NA	NA	NA	0.019	NA	NA	NA	NA
SE	Mta1:chr12:113126774-113126877:113127614-113127714:113128031-113128220:+	chr12:113127614-113127714	NA	NA	NA	NA	NA	NA	NA	NA	NA	NA	NA	NA	NA	NA	NA	NA	NA	NA	NA	NA	NA	0.995	NA	NA
SE	Aqr:chr2:114133367-114134819:114136869-114137048:114140868-114141010:-	chr2:114136869-114137048	NA	NA	NA	NA	NA	NA	NA	NA	NA	NA	NA	NA	NA	NA	NA	NA	NA	NA	0.988	NA	NA	NA	NA	NA
SE	Chek2:chr5:110839978-110840048:110840410-110840540:110841205-110841333:+	chr5:110840410-110840540	0.471	NA	0.728	NA	NA	0.082	NA	0.308	0.211	0.416	NA	0.445	0.516	NA	0.416	NA	0.728	0.516	0.651	0.151	NA	0.211	0.762	0.192
SE	Ctsl:chr13:64366867-64367092:64367859-64368006:64368115-64368238:-	chr13:64367859-64368006	NA	NA	NA	NA	NA	NA	NA	NA	NA	NA	NA	NA	NA	NA	NA	NA	NA	NA	NA	0.999	NA	NA	NA	NA
A3SS	Nek6:chr2:38557855-38557956:38557815-38557956:38550552-38550671:+	chr2:38557815-38557855	0.955	0.995	NA	NA	NA	0.987	NA	0.995	NA	0.984	NA	NA	NA	NA	NA	NA	0.995	0.988	NA	NA	0.967	NA	NA	NA
RI	Aldoa:chr7:126797336-126797548:126797336-126797776:126797643-126797776:-	chr7:126797548-126797643	0.076	0.068	0.074	0.08	0.07	0.072	0.081	0.089	0.065	0.078	0.087	0.075	0.111	0.076	0.074	0.119	0.077	0.081	0.091	0.083	0.081	0.065	0.067	0.068
SE	Bicc1:chr10:70947771-70947933:70949938-70950125:70953394-70953526:-	chr10:70949938-70950125	NA	0.993	NA	0.998	0.995	0.997	NA	0.997	0.998	0.997	0.998	0.995	0.994	0.989	NA	NA	NA	NA	NA	NA	NA	NA	0.997	NA
SE	Cep57:chr9:13809859-13810004:13812632-13812710:13813409-13813514:-	chr9:13812632-13812710	NA	NA	NA	NA	0.724	NA	NA	NA	NA	NA	NA	NA	NA	NA	NA	NA	NA	NA	NA	NA	NA	NA	NA	NA
SE	Tmem50b:chr16:91577973-91578031:91580201-91580294:91581694-91581762:-	chr16:91580201-91580294	NA	NA	NA	NA	0.99	0.985	NA	NA	NA	NA	NA	NA	NA	0.957	NA	NA	NA	NA	NA	NA	0.967	0.996	NA	NA
RI	Slc7a4:chr16:17573945-17573997:17573945-17574586:17574473-17574586:-	chr16:17573997-17574473	NA	NA	NA	NA	NA	NA	NA	NA	NA	NA	NA	NA	NA	NA	NA	NA	NA	NA	NA	NA	NA	NA	NA	0.656
SE	Eps8:chr6:137537617-137537694:137539321-137539401:137570701-137571017:-	chr6:137539321-137539401	NA	NA	NA	NA	NA	NA	NA	0.796	NA	NA	NA	NA	0.854	NA	0.854	NA	NA	NA	NA	NA	NA	NA	NA	NA
A5SS	Plekhg3:chr12:76572394-76572658:76572394-76572745:76573246-76573360:+	chr12:76572658-76572745	0.957	0.868	0.981	0.801	0.798	0.902	0.969	0.94	0.94	0.895	0.902	0.843	0.927	0.894	0.946	NA	0.936	0.858	NA	0.895	0.828	NA	0.7	0.854
SE	Zmym3:chrX:101417286-101417330:101418272-101418952:101419697-101419798:-	chrX:101418272-101418952	0.938	0.897	0.884	0.966	NA	NA	0.963	NA	NA	0.977	0.93	NA	NA	0.962	0.833	NA	NA	0.981	NA	NA	NA	0.847	NA	0.956
SE	Lamb2:chr9:108483529-108483609:108483687-108483820:108484010-108484169:+	chr9:108483687-108483820	NA	NA	NA	0.995	NA	NA	NA	NA	NA	NA	NA	NA	NA	NA	NA	NA	NA	NA	NA	NA	0.991	NA	NA	NA
RI	Tia1:chr6:86418877-86418932:86418877-86420411:86420323-86420411:+	chr6:86418932-86420323	0.676	0.786	0.675	0.594	0.697	0.765	0.711	0.805	0.679	0.861	0.749	0.851	0.695	0.714	0.735	NA	0.696	0.687	0.819	0.847	0.861	0.594	0.777	0.872
SE	Mndal:chr1:173862460-173862883:173865398-173865557:173868199-173868319:-	chr1:173865398-173865557	NA	NA	NA	NA	NA	0.981	NA	NA	NA	NA	NA	NA	NA	NA	NA	NA	NA	NA	NA	NA	NA	NA	NA	NA
SE	Dlat:chr9:50637455-50637592:50637920-50638083:50644025-50644133:-	chr9:50637920-50638083	NA	0.994	NA	NA	NA	NA	NA	NA	NA	NA	NA	NA	NA	NA	NA	NA	NA	NA	NA	NA	NA	NA	NA	NA
SE	Abi3bp:chr16:56613672-56613720:56614689-56614752:56617374-56617434:+	chr16:56614689-56614752	NA	NA	0.969	NA	NA	0.934	NA	0.922	NA	0.936	NA	0.905	NA	0.972	NA	NA	NA	0.987	NA	NA	NA	NA	0.906	0.98
SE	Mvd:chr8:122439637-122439752:122439955-122440058:122440181-122440252:-	chr8:122439955-122440058	0.023	NA	NA	NA	NA	NA	NA	NA	NA	NA	0.021	NA	NA	NA	NA	NA	NA	NA	NA	0.014	NA	NA	NA	NA
SE	Senp2:chr16:22014123-22014257:22018336-22018427:22023639-22023808:+	chr16:22018336-22018427	NA	NA	NA	NA	NA	NA	NA	NA	NA	NA	NA	NA	NA	NA	NA	NA	0.978	NA	NA	NA	NA	NA	NA	NA
SE	Plin3:chr17:56286447-56286646:56287793-56287876:56290453-56290511:-	chr17:56287793-56287876	0.993	NA	NA	NA	NA	NA	NA	NA	NA	NA	NA	NA	NA	NA	NA	NA	0.988	NA	NA	NA	NA	NA	NA	NA
A3SS	Gba:chr3:89207823-89207987:89207783-89207987:89207226-89207451:+	chr3:89207783-89207823	0.041	0.038	0.083	0.058	0.082	0.059	0.035	0.033	0.071	0.037	0.029	0.059	0.02	0.041	0.042	0.008	0.032	0.046	0.014	0.006	0.037	0.074	0.068	0.061
SE	Adgra2:chr8:27085582-27086211:27098785-27098857:27109327-27109399:+	chr8:27098785-27098857	0.983	0.996	0.997	NA	NA	NA	0.99	NA	NA	NA	NA	NA	NA	NA	0.997	NA	0.998	0.996	0.995	NA	NA	0.997	0.994	0.997
SE	Rtel1:chr2:181352752-181352848:181353976-181354175:181354352-181354442:+	chr2:181353976-181354175	0.924	NA	NA	0.839	NA	NA	NA	NA	0.946	0.971	NA	NA	NA	NA	NA	NA	NA	0.86	NA	NA	0.851	NA	NA	0.908
SE	Elk4:chr1:132019349-132019466:132023552-132023838:132031563-132032612:+	chr1:132023552-132023838	NA	NA	0.811	NA	NA	NA	NA	NA	NA	NA	NA	NA	NA	NA	NA	NA	NA	NA	NA	NA	NA	NA	NA	NA
SE	Ssh3:chr19:4266521-4266637:4267746-4268582:4269014-4269180:-	chr19:4267746-4268582	NA	NA	NA	NA	NA	NA	0.784	NA	NA	NA	NA	NA	NA	NA	NA	NA	NA	NA	NA	NA	NA	NA	NA	NA
SE	Glb1:chr9:114437738-114437860:114437940-114437981:114443008-114443121:+	chr9:114437940-114437981	NA	0.979	NA	NA	NA	NA	NA	NA	NA	NA	NA	NA	NA	NA	NA	NA	NA	NA	0.966	NA	NA	NA	NA	NA
A5SS	Pitpnm3:chr11:72074958-72075035:72074418-72075035:72071398-72071588:-	chr11:72074418-72074958	0.424	NA	NA	0.684	0.752	NA	NA	NA	NA	NA	0.722	NA	NA	0.393	NA	NA	NA	NA	NA	0.245	0.393	NA	NA	NA
SE	Tnc:chr4:63982650-63982923:63995540-63995813:64000697-64000970:-	chr4:63995540-63995813	NA	0.99	0.988	NA	NA	NA	NA	NA	NA	NA	NA	NA	NA	NA	NA	NA	0.988	NA	NA	NA	NA	0.998	NA	0.983
SE	Btbd2:chr10:80642616-80643691:80643825-80643972:80644261-80644349:-	chr10:80643825-80643972	NA	NA	NA	NA	NA	NA	NA	NA	NA	NA	0.991	NA	NA	NA	NA	NA	NA	NA	NA	NA	NA	NA	NA	NA
SE	Jak2:chr19:29286300-29286412:29287900-29288087:29294855-29294943:+	chr19:29287900-29288087	0.961	NA	NA	NA	NA	NA	NA	NA	NA	NA	NA	NA	NA	NA	NA	NA	0.969	NA	NA	NA	NA	NA	NA	NA
A5SS	Mia:chr7:27180699-27180833:27180168-27180833:27179743-27179834:-	chr7:27180168-27180699	0.98	NA	NA	NA	NA	NA	NA	NA	NA	NA	NA	NA	NA	NA	NA	NA	NA	NA	NA	NA	NA	NA	NA	NA
SE	Thoc1:chr18:9986288-9986355:9986552-9986603:9986690-9986761:+	chr18:9986552-9986603	0.988	NA	NA	NA	NA	NA	NA	0.987	NA	NA	NA	NA	NA	NA	NA	NA	NA	0.97	0.979	NA	NA	NA	NA	NA
RI	Tomm6:chr17:47686739-47687062:47686739-47687288:47687187-47687288:-	chr17:47687062-47687187	0.352	0.356	0.324	0.242	0.407	0.357	0.367	0.422	0.392	0.412	0.422	0.443	0.306	0.262	0.386	0.348	0.331	0.365	0.316	0.209	0.372	0.299	0.357	0.399
RI	D230025D16Rik:chr8:105238422-105238466:105238422-105239750:105239670-105239750:+	chr8:105238466-105239670	0.092	0.046	0.042	0.056	0.057	0.09	0.079	0.086	0.038	0.055	0.075	0.079	0.059	0.088	0.041	0.119	0.033	0.055	0.006	0.061	0.041	0.037	0.07	0.067
SE	Tmtc4:chr14:122921232-122921302:122925963-122926076:122927551-122927666:-	chr14:122925963-122926076	NA	NA	NA	NA	NA	NA	NA	NA	NA	NA	NA	NA	NA	NA	0.992	NA	NA	0.978	0.994	NA	0.988	NA	NA	NA
RI	Dchs1:chr7:105757265-105757396:105757265-105757741:105757586-105757741:-	chr7:105757396-105757586	0.105	0.071	0.058	0.116	0.068	NA	0.089	0.068	0.155	NA	0.052	0.068	NA	0.119	0.11	NA	0.056	NA	0.15	NA	NA	0.047	NA	0.028
A3SS	Edrf1:chr7:133660135-133660294:133660070-133660294:133658425-133658644:+	chr7:133660070-133660135	0.92	0.841	0.922	0.921	0.701	0.93	0.646	0.883	0.619	0.807	0.929	0.812	0.843	0.949	NA	NA	0.877	0.893	0.716	0.891	0.86	0.969	0.91	0.712
A5SS	Trmt10b:chr4:45301235-45301344:45301235-45301350:45304263-45304388:+	chr4:45301344-45301350	NA	0.952	NA	NA	NA	NA	NA	NA	NA	NA	NA	NA	NA	NA	NA	NA	NA	NA	NA	NA	NA	NA	NA	NA
SE	Zfp248:chr6:118433304-118433431:118453845-118453887:118454676-118454911:-	chr6:118453845-118453887	NA	NA	NA	NA	NA	NA	NA	NA	0.951	NA	NA	0.854	NA	NA	NA	NA	NA	NA	NA	NA	NA	NA	NA	NA
SE	Entr1:chr2:26386654-26387671:26388491-26388560:26389148-26389283:-	chr2:26388491-26388560	0.521	0.463	0.314	0.304	0.372	0.594	0.316	0.455	0.396	0.38	0.3	0.636	0.406	0.4	0.546	0.719	0.344	0.383	0.248	0.406	0.198	0.264	0.419	0.383
SE	Mtg2:chr2:180083344-180083460:180084063-180084312:180084450-180084589:+	chr2:180084063-180084312	NA	NA	NA	NA	NA	NA	NA	NA	NA	NA	0.953	NA	NA	NA	NA	NA	NA	NA	NA	NA	NA	NA	NA	NA
SE	Terf2:chr8:107072559-107072645:107072721-107072798:107076878-107076996:-	chr8:107072721-107072798	0.397	0.283	NA	NA	0.569	0.397	NA	NA	NA	NA	NA	NA	NA	NA	NA	NA	0.569	0.397	NA	0.18	NA	NA	0.767	NA
SE	Flii:chr11:60719024-60719107:60719692-60719872:60720005-60720218:-	chr11:60719692-60719872	0.994	NA	NA	NA	0.995	NA	NA	NA	0.988	NA	NA	0.99	NA	0.995	NA	NA	NA	NA	NA	NA	NA	NA	NA	NA
SE	Mier1:chr4:103115559-103115660:103118241-103118315:103127272-103127297:+	chr4:103118241-103118315	0.231	0.757	0.44	0.527	0.448	0.358	0.417	0.259	0.157	0.323	0.486	0.211	0.476	0.604	0.572	0.445	0.857	0.355	0.583	0.445	0.39	0.471	0.369	0.705
SE	Lmcd1:chr6:112273757-112273972:112310485-112310741:112315575-112315911:+	chr6:112310485-112310741	NA	NA	NA	NA	NA	NA	NA	NA	NA	NA	NA	NA	NA	NA	NA	NA	NA	NA	NA	0.977	NA	NA	NA	NA
SE	Utp25:chr1:193122005-193122094:193123317-193123387:193123637-193123808:-	chr1:193123317-193123387	NA	NA	NA	NA	NA	NA	0.047	NA	NA	0.018	NA	NA	NA	NA	NA	NA	NA	NA	NA	NA	NA	NA	NA	NA
SE	Prss36:chr7:127935501-127935665:127935764-127936003:127936324-127936454:-	chr7:127935764-127936003	NA	NA	NA	NA	NA	0.506	NA	NA	NA	NA	NA	0.277	NA	0.434	NA	NA	NA	NA	NA	0.277	NA	NA	NA	NA
SE	Ppp2r3a:chr9:101107882-101107969:101117177-101117304:101125022-101125125:-	chr9:101117177-101117304	NA	NA	0.063	NA	NA	NA	NA	NA	NA	NA	NA	NA	NA	NA	NA	NA	NA	NA	NA	NA	NA	NA	NA	NA
SE	Slc9a8:chr2:167465340-167465457:167467684-167467767:167468963-167469075:+	chr2:167467684-167467767	NA	NA	NA	NA	NA	NA	NA	NA	NA	NA	NA	NA	NA	0.96	0.938	NA	NA	NA	NA	NA	NA	NA	NA	NA
SE	Cox10:chr11:64045226-64045351:64071517-64071836:64079335-64079466:-	chr11:64071517-64071836	NA	0.971	NA	NA	NA	NA	NA	NA	NA	NA	NA	NA	NA	NA	NA	NA	NA	NA	NA	NA	NA	NA	NA	NA
SE	Pdzd2:chr15:12419457-12419572:12445522-12445665:12457797-12458299:-	chr15:12445522-12445665	NA	NA	NA	NA	0.819	NA	NA	NA	NA	NA	NA	NA	NA	NA	NA	NA	NA	NA	NA	NA	NA	NA	NA	NA
SE	Aste1:chr9:105396544-105397858:105401475-105401686:105403395-105403591:+	chr9:105401475-105401686	NA	0.937	NA	NA	NA	NA	NA	NA	NA	NA	NA	NA	NA	NA	NA	NA	NA	NA	NA	NA	NA	NA	NA	NA
SE	Higd1a:chr9:121856449-121856585:121856720-121856872:121857511-121857535:-	chr9:121856720-121856872	0.366	NA	NA	NA	0.373	0.748	0.446	0.284	0.598	0.598	0.288	NA	0.712	0.553	NA	NA	0.497	NA	NA	0.497	0.076	NA	0.426	0.598
SE	Ypel1:chr16:17070198-17070363:17077192-17077402:17077774-17078054:+	chr16:17077192-17077402	0.009	NA	NA	0.066	NA	NA	NA	NA	0.015	0.172	0.017	0.098	NA	NA	NA	NA	NA	0.147	NA	NA	0.098	0.077	0.025	NA
SE	Cep350:chr1:155959719-155959831:155961143-155961187:155962474-155962560:-	chr1:155961143-155961187	NA	0.956	NA	0.939	NA	0.874	NA	NA	NA	NA	NA	NA	0.563	NA	NA	NA	NA	0.933	NA	0.909	NA	NA	0.903	NA
SE	Gpbp1l1:chr4:116579246-116579319:116581249-116581443:116587370-116587511:+	chr4:116581249-116581443	NA	NA	NA	NA	NA	NA	NA	NA	NA	NA	NA	NA	NA	NA	NA	NA	NA	NA	NA	NA	NA	NA	NA	0.984
SE	Pdss1:chr2:22935558-22935639:22939078-22939206:22939822-22940242:+	chr2:22939078-22939206	NA	NA	NA	NA	NA	NA	NA	NA	NA	NA	NA	0.035	NA	NA	NA	NA	NA	NA	NA	NA	NA	NA	NA	NA
SE	Trdn:chr10:33399094-33399145:33438791-33438818:33439174-33439222:+	chr10:33438791-33438818	NA	NA	NA	0.629	NA	NA	NA	NA	0.748	NA	NA	NA	NA	NA	NA	NA	NA	NA	NA	0.733	NA	NA	NA	NA
SE	Smarce1:chr11:99213119-99213330:99214033-99214135:99215113-99215286:-	chr11:99214033-99214135	NA	NA	NA	NA	NA	NA	NA	0.991	NA	NA	NA	NA	NA	NA	NA	NA	NA	NA	NA	NA	NA	NA	NA	NA
SE	Rnf121:chr7:102035306-102035461:102039549-102039691:102042626-102042664:-	chr7:102039549-102039691	NA	0.979	NA	NA	NA	0.988	NA	NA	NA	NA	NA	NA	0.971	0.976	NA	NA	NA	NA	NA	NA	NA	NA	NA	NA
SE	Wfdc2:chr2:164563307-164563451:164564056-164564212:164565791-164565938:+	chr2:164564056-164564212	NA	NA	NA	NA	NA	0.93	NA	NA	NA	NA	NA	0.935	NA	0.981	NA	NA	NA	NA	NA	NA	NA	NA	NA	NA
SE	Sfi1:chr11:3133071-3133207:3134317-3134501:3134625-3134730:-	chr11:3134317-3134501	NA	NA	NA	0.964	NA	NA	NA	NA	NA	NA	NA	NA	NA	NA	NA	NA	NA	NA	NA	NA	NA	NA	NA	NA
SE	Zfp346:chr13:55113677-55113770:55115482-55115624:55122329-55122515:+	chr13:55115482-55115624	NA	NA	NA	NA	NA	NA	NA	NA	0.86	NA	NA	NA	NA	NA	NA	NA	0.928	NA	NA	0.813	NA	0.822	NA	NA
A5SS	Rpl13a:chr7:45128699-45128735:45128541-45128735:45127495-45127568:-	chr7:45128541-45128699	0.011	0.006	0.007	0.013	0.018	0.023	0.011	0.023	0.023	0.014	0.021	0.022	0.021	0.021	0.006	NA	0.003	0.027	0.005	0.011	0.017	0.006	0.018	0.007
SE	Fam214b:chr4:43034658-43034764:43034942-43035001:43035835-43036804:-	chr4:43034942-43035001	NA	NA	NA	NA	NA	NA	NA	0.925	NA	NA	NA	NA	NA	NA	NA	NA	NA	NA	NA	NA	NA	NA	NA	NA
SE	Gtf2ird1:chr5:134390821-134390930:134392394-134392420:134395616-134395700:-	chr5:134392394-134392420	NA	NA	NA	NA	NA	NA	NA	NA	NA	NA	NA	NA	NA	NA	NA	NA	0.987	0.94	NA	NA	NA	NA	NA	NA
SE	Grina:chr15:76246769-76246900:76247639-76247737:76247850-76248177:+	chr15:76247639-76247737	0.118	0.128	0.063	0.136	0.161	0.163	0.153	0.229	0.128	0.212	0.159	0.177	0.295	0.194	0.07	0.103	0.083	0.212	0.168	0.157	0.153	0.078	0.209	0.12
SE	Usp7:chr16:8703463-8703546:8704927-8705018:8705103-8705184:-	chr16:8704927-8705018	NA	NA	NA	NA	NA	NA	NA	NA	NA	NA	NA	NA	NA	NA	0.952	NA	NA	NA	NA	NA	NA	NA	NA	NA
SE	Tulp4:chr17:6222303-6222448:6224151-6224245:6229334-6229478:+	chr17:6224151-6224245	NA	NA	NA	NA	NA	NA	NA	NA	NA	NA	NA	NA	NA	0.987	0.987	NA	NA	NA	NA	NA	NA	NA	NA	0.989
SE	Add3:chr19:53242503-53242627:53244309-53244405:53244997-53246940:+	chr19:53244309-53244405	0.042	0.208	0.137	0.047	0.031	0.02	0.065	0.048	0.049	0.051	0.035	NA	NA	NA	0.043	0.076	0.096	0.013	0.118	0.051	0.082	0.042	0.043	0.133
SE	Tdp1:chr12:99898263-99898360:99902347-99902382:99906035-99906128:+	chr12:99902347-99902382	0.978	NA	NA	NA	0.975	NA	NA	NA	0.957	NA	NA	NA	NA	NA	0.974	NA	NA	NA	NA	NA	0.983	NA	NA	NA
SE	Srbd1:chr17:86120649-86120746:86126110-86126249:86127715-86127833:-	chr17:86126110-86126249	NA	NA	NA	NA	NA	NA	NA	0.93	NA	NA	NA	NA	NA	NA	NA	NA	NA	NA	NA	NA	NA	NA	NA	NA
SE	Fastkd2:chr1:63735462-63735571:63735844-63735968:63737778-63737918:+	chr1:63735844-63735968	NA	NA	0.953	NA	NA	NA	NA	NA	NA	NA	NA	NA	NA	NA	NA	NA	NA	NA	NA	NA	NA	NA	0.946	NA
SE	Gng12:chr6:66896430-66896515:66914452-66914510:67015724-67015843:+	chr6:66914452-66914510	NA	0.989	0.987	0.984	NA	NA	NA	NA	NA	NA	NA	NA	NA	0.989	NA	NA	0.988	0.988	NA	NA	NA	NA	0.97	0.974
SE	Gas5:chr1:161035982-161036244:161036548-161036579:161036819-161036852:+	chr1:161036548-161036579	NA	NA	NA	NA	NA	NA	0.993	NA	NA	0.998	0.999	NA	NA	0.999	NA	NA	0.999	NA	NA	NA	NA	NA	0.995	NA
SE	Ppt1:chr4:122854379-122854478:122855805-122855877:122857509-122859078:+	chr4:122855805-122855877	0.988	0.99	0.997	0.996	NA	NA	0.996	0.996	0.982	0.997	NA	NA	0.991	0.996	0.997	1	0.975	NA	0.997	0.978	0.989	0.995	0.992	0.991
SE	Pi4ka:chr16:17378441-17378514:17381800-17381889:17389340-17389457:-	chr16:17381800-17381889	NA	NA	NA	NA	NA	NA	0.862	NA	NA	NA	NA	NA	NA	NA	NA	NA	NA	NA	NA	NA	NA	NA	NA	NA
SE	Rnf10:chr5:115256973-115257173:115259493-115259546:115260118-115260226:-	chr5:115259493-115259546	0.015	0.006	0.002	0.002	0.007	0.003	0.002	0.008	0.002	0.002	0.021	0.019	0.005	0.002	NA	0.077	NA	0.009	NA	0.03	NA	NA	0.01	0.004
SE	Sned1:chr1:93285795-93285940:93286011-93286094:93289307-93289424:+	chr1:93286011-93286094	0.997	NA	NA	0.995	NA	NA	NA	NA	NA	NA	NA	NA	NA	NA	NA	NA	NA	NA	NA	NA	NA	NA	NA	NA
SE	Igf1:chr10:87859067-87859412:87864730-87864887:87913618-87913800:+	chr10:87864730-87864887	NA	0.987	NA	NA	0.996	NA	NA	0.997	NA	NA	NA	NA	NA	0.986	0.995	NA	NA	NA	0.993	NA	NA	NA	NA	0.989
SE	Psen1:chr12:83728697-83728784:83730538-83730712:83731673-83731792:+	chr12:83730538-83730712	NA	NA	NA	NA	NA	NA	NA	NA	NA	NA	NA	NA	NA	NA	NA	NA	NA	NA	0.991	NA	NA	NA	NA	0.99
SE	St3gal4:chr9:35055197-35055282:35055573-35055649:35116697-35116873:-	chr9:35055573-35055649	NA	NA	NA	NA	NA	NA	0.979	NA	NA	0.985	0.978	NA	NA	NA	NA	NA	NA	0.991	NA	NA	NA	0.967	NA	NA
SE	Fuz:chr7:44897519-44897624:44898515-44898700:44898775-44898871:+	chr7:44898515-44898700	0.811	0.902	0.856	0.919	0.819	0.935	0.976	0.938	0.947	0.836	0.877	0.901	0.862	0.887	0.838	NA	0.935	0.838	NA	0.956	0.676	0.875	0.932	0.919
SE	Col9a3:chr2:180611428-180611500:180612953-180612989:180614146-180614191:+	chr2:180612953-180612989	NA	NA	NA	NA	0.988	NA	NA	NA	NA	NA	NA	NA	NA	NA	NA	NA	NA	NA	NA	NA	NA	NA	NA	NA
SE	Soat1:chr1:156439700-156439782:156440506-156440585:156441228-156441511:-	chr1:156440506-156440585	NA	NA	NA	NA	NA	NA	NA	NA	NA	0.991	NA	NA	NA	NA	NA	NA	NA	NA	NA	NA	NA	NA	NA	NA
SE	Fam13b:chr18:34462060-34462208:34462960-34463009:34473549-34473685:-	chr18:34462960-34463009	NA	NA	NA	NA	NA	NA	NA	NA	NA	NA	NA	NA	NA	NA	NA	NA	0.981	NA	NA	NA	NA	NA	NA	NA
A5SS	Cpeb1:chr7:81356908-81356998:81356893-81356998:81355874-81356011:-	chr7:81356893-81356908	0.092	NA	NA	0.087	NA	NA	NA	NA	0.054	NA	NA	NA	NA	0.054	NA	NA	NA	NA	0.102	0.076	0.041	NA	NA	0.132
SE	AU040320:chr4:126839598-126839747:126840645-126840797:126841105-126841244:+	chr4:126840645-126840797	NA	NA	NA	NA	NA	NA	NA	NA	NA	NA	NA	NA	NA	NA	NA	NA	NA	NA	NA	NA	0.974	NA	NA	NA
A5SS	Ilkap:chr1:91388354-91388446:91388344-91388446:91387214-91387341:-	chr1:91388344-91388354	0.904	0.858	0.869	0.918	0.824	0.885	0.883	0.857	0.907	0.937	0.918	0.901	0.768	0.824	0.88	NA	0.882	0.847	0.928	0.778	0.821	0.913	0.769	0.878
SE	Ttn:chr2:76921550-76921607:76925604-76925979:76927086-76927275:-	chr2:76925604-76925979	NA	NA	NA	0.042	NA	NA	NA	NA	NA	NA	NA	NA	NA	NA	NA	NA	NA	NA	NA	0.124	NA	NA	NA	NA
SE	Paip2:chr18:35598648-35598759:35608737-35608819:35610870-35611034:+	chr18:35608737-35608819	0.011	NA	0.007	0.023	0.008	0.025	0.005	0.028	0.01	0.018	0.009	0.031	0.023	0.01	NA	NA	NA	0.015	NA	0.008	0.012	0.005	0.021	0.002
SE	Phtf2:chr5:20761663-20761789:20764213-20764309:20765757-20765913:-	chr5:20764213-20764309	NA	NA	NA	NA	NA	NA	NA	NA	NA	NA	NA	NA	NA	0.965	NA	NA	NA	NA	NA	NA	NA	NA	NA	NA
SE	Snx27:chr3:94531196-94531389:94561768-94562000:94582244-94582549:-	chr3:94561768-94562000	NA	NA	0.98	0.975	NA	NA	0.883	0.935	NA	NA	NA	0.884	NA	NA	NA	NA	0.969	NA	NA	NA	0.876	NA	NA	NA
RI	Becn1:chr11:101294000-101294147:101294000-101295164:101295034-101295164:-	chr11:101294147-101295034	NA	NA	0.954	NA	0.963	NA	NA	0.819	0.965	NA	NA	NA	NA	0.839	NA	NA	NA	NA	NA	NA	0.951	NA	0.937	NA
SE	Scn3a:chr2:65507146-65507279:65508314-65508662:65514471-65514762:-	chr2:65508314-65508662	NA	NA	NA	NA	NA	NA	NA	NA	0.375	NA	NA	NA	NA	NA	NA	NA	NA	NA	NA	NA	NA	NA	NA	NA
SE	Slc7a2:chr8:40905504-40905727:40908055-40908195:40908397-40908534:+	chr8:40908055-40908195	NA	NA	NA	NA	0.973	0.938	NA	NA	0.861	NA	NA	NA	0.984	0.881	NA	NA	NA	0.86	NA	NA	NA	NA	NA	NA
SE	Prkd1:chr12:50394829-50395040:50419852-50419876:50425438-50425599:-	chr12:50419852-50419876	0.227	0.329	0.148	0.447	0.446	0.201	0.202	0.194	0.189	0.33	0.338	0.352	0.213	0.284	0.259	0.212	0.275	0.291	0.259	0.22	0.301	0.33	0.229	0.217
A5SS	Slc25a10:chr11:120497013-120497106:120497013-120497461:120497919-120497976:+	chr11:120497106-120497461	NA	NA	NA	0.995	0.987	NA	NA	NA	NA	NA	0.994	NA	NA	NA	NA	NA	NA	NA	NA	NA	NA	NA	NA	NA
SE	Matr3:chr18:35562486-35562521:35572766-35572935:35577557-35577619:+	chr18:35572766-35572935	0.983	NA	NA	NA	NA	NA	NA	0.994	NA	NA	0.992	NA	NA	0.992	NA	NA	0.974	NA	NA	0.992	NA	NA	NA	NA
SE	Zgrf1:chr3:127586018-127586203:127587940-127588137:127589968-127590108:+	chr3:127587940-127588137	NA	NA	NA	NA	NA	0.683	NA	NA	NA	NA	NA	NA	NA	NA	NA	NA	NA	NA	NA	NA	NA	NA	NA	NA
SE	Ank:chr15:27557163-27557247:27562723-27562894:27564901-27565036:+	chr15:27562723-27562894	NA	NA	NA	0.997	NA	NA	NA	NA	NA	NA	NA	NA	NA	NA	NA	NA	NA	NA	NA	NA	NA	NA	NA	NA
SE	Gulp1:chr1:44708616-44708678:44744473-44744545:44780967-44781106:+	chr1:44744473-44744545	NA	NA	NA	NA	NA	0.991	NA	NA	NA	0.978	NA	NA	NA	NA	0.981	NA	NA	NA	NA	NA	NA	NA	NA	NA
SE	Utp14b:chr1:78658037-78658103:78663140-78663280:78664325-78667584:+	chr1:78663140-78663280	NA	NA	NA	NA	NA	NA	NA	NA	NA	NA	NA	0.673	NA	NA	NA	NA	NA	NA	NA	NA	NA	NA	NA	NA
SE	Rexo4:chr2:26956288-26956363:26958478-26958567:26960602-26960740:-	chr2:26958478-26958567	NA	NA	NA	NA	NA	NA	NA	NA	NA	0.966	NA	NA	NA	NA	NA	NA	NA	NA	NA	NA	NA	NA	NA	NA
SE	Sqor:chr2:122792349-122792403:122798037-122798232:122799761-122799971:+	chr2:122798037-122798232	0.992	NA	NA	NA	NA	NA	NA	NA	NA	NA	NA	NA	NA	NA	NA	NA	NA	NA	NA	NA	NA	NA	NA	NA
SE	Pcbp2:chr15:102483159-102483288:102484153-102484240:102485947-102486040:+	chr15:102484153-102484240	NA	NA	NA	NA	NA	NA	NA	NA	NA	NA	NA	NA	NA	NA	NA	NA	NA	0.998	NA	NA	NA	NA	NA	NA
SE	Mmp28:chr11:83444820-83445066:83447519-83447744:83451385-83451573:-	chr11:83447519-83447744	NA	NA	0.705	NA	NA	NA	NA	NA	NA	NA	NA	NA	NA	NA	NA	NA	NA	NA	NA	NA	NA	NA	NA	NA
A3SS	Atxn3:chr12:101948003-101948045:101948003-101948048:101948274-101948439:-	chr12:101948045-101948048	NA	0.94	0.677	0.903	NA	0.595	0.844	0.723	0.815	0.662	0.932	0.797	NA	0.895	NA	NA	NA	0.88	NA	0.949	0.837	0.915	0.62	0.495
SE	Dnm2:chr9:21476472-21476608:21481332-21481419:21485650-21485721:+	chr9:21481332-21481419	NA	NA	NA	NA	NA	NA	NA	NA	NA	NA	0.974	NA	NA	NA	NA	NA	NA	NA	NA	NA	NA	NA	NA	NA
RI	Cox5a:chr9:57528955-57529072:57528955-57530362:57530240-57530362:+	chr9:57529072-57530240	0.009	0.009	0.007	0.008	0.006	0.008	0.007	0.015	0.012	0.009	0.013	0.011	0.01	0.007	0.008	0.004	0.005	0.016	0.008	0.009	0.011	0.007	0.007	0.011
SE	Hsd3b7:chr7:127801833-127801942:127802013-127802113:127802235-127802270:+	chr7:127802013-127802113	NA	NA	NA	NA	NA	NA	NA	NA	NA	NA	NA	NA	NA	NA	NA	NA	NA	NA	NA	0.955	NA	NA	NA	NA
SE	Atrx:chrX:105890916-105890972:105899880-105899993:105911469-105911654:-	chrX:105899880-105899993	NA	NA	NA	NA	NA	NA	NA	NA	0.966	NA	NA	0.887	NA	NA	0.974	NA	NA	NA	NA	NA	NA	0.965	NA	NA
SE	Abhd14a:chr9:106444089-106444306:106445525-106445829:106447530-106447620:-	chr9:106445525-106445829	0.429	0.15	0.2	0.555	0.602	0.477	0.307	0.486	0.357	0.574	0.504	0.383	0.382	0.632	0.135	NA	0.188	0.713	0.141	0.572	0.361	0.219	0.541	0.187
SE	Sgk3:chr1:9885666-9885753:9885988-9886142:9891360-9891450:+	chr1:9885988-9886142	NA	NA	NA	NA	NA	NA	NA	NA	NA	NA	NA	NA	0.45	NA	NA	NA	NA	NA	NA	NA	NA	NA	NA	NA
SE	Vars:chr17:35004711-35004893:35004976-35005061:35005249-35005329:+	chr17:35004976-35005061	NA	NA	NA	NA	NA	NA	NA	0.955	NA	NA	NA	NA	NA	NA	NA	NA	NA	NA	NA	NA	NA	NA	NA	NA
SE	Cadps:chr14:12603621-12603855:12616065-12616146:12705511-12705844:-	chr14:12616065-12616146	NA	NA	NA	NA	NA	NA	NA	NA	NA	NA	NA	NA	NA	NA	NA	NA	NA	NA	NA	NA	NA	0.947	NA	NA
SE	Brox:chr1:183291906-183292003:183294333-183294450:183294776-183294864:-	chr1:183294333-183294450	NA	NA	NA	NA	NA	NA	NA	NA	NA	NA	NA	NA	NA	NA	0.966	NA	NA	NA	NA	NA	NA	NA	NA	NA
SE	Sh3d19:chr3:86083226-86083365:86083501-86083655:86084367-86085357:+	chr3:86083501-86083655	0.992	NA	NA	NA	0.995	NA	NA	0.995	NA	NA	0.968	0.994	NA	NA	NA	NA	NA	NA	NA	NA	NA	NA	NA	NA
SE	Pigs:chr11:78333666-78333758:78335426-78335634:78336687-78336830:+	chr11:78335426-78335634	NA	NA	NA	0.996	NA	0.992	NA	NA	NA	NA	NA	NA	NA	NA	NA	NA	NA	NA	NA	NA	NA	NA	NA	0.998
A3SS	Zfp946:chr17:22451096-22451152:22451078-22451152:22444167-22444291:+	chr17:22451078-22451096	NA	NA	NA	NA	NA	NA	NA	NA	NA	NA	NA	0.899	NA	NA	NA	NA	NA	NA	NA	NA	NA	NA	NA	NA
SE	Cyld:chr8:88723098-88723212:88729458-88729838:88730655-88730821:+	chr8:88729458-88729838	NA	NA	NA	NA	NA	NA	NA	NA	NA	NA	NA	0.951	NA	NA	NA	NA	NA	NA	NA	NA	NA	NA	NA	NA
SE	Smtn:chr11:3517522-3517827:3520751-3520916:3521816-3521968:-	chr11:3520751-3520916	0.932	NA	NA	0.966	0.988	NA	0.943	NA	0.93	NA	0.883	NA	NA	0.976	NA	NA	NA	NA	NA	0.911	0.933	NA	NA	NA
SE	Fsd1l:chr4:53649791-53649893:53655740-53655763:53659512-53659634:+	chr4:53655740-53655763	0.464	NA	NA	NA	NA	0.302	0.464	NA	0.271	0.224	0.257	0.51	NA	0.634	0.302	NA	NA	0.722	NA	0.722	NA	0.722	NA	NA
SE	Kantr:chrX:152319796-152320284:152327160-152327239:152327365-152327463:-	chrX:152327160-152327239	NA	NA	NA	NA	NA	NA	NA	NA	NA	NA	NA	NA	NA	NA	NA	NA	NA	0.797	NA	NA	NA	NA	NA	NA
A3SS	Usp7:chr16:8698719-8698809:8698719-8698850:8699142-8699287:-	chr16:8698809-8698850	NA	NA	NA	NA	NA	NA	NA	NA	NA	NA	NA	NA	NA	NA	NA	NA	NA	NA	NA	NA	NA	NA	0.979	NA
A3SS	Tm2d3:chr7:65695169-65695327:65695142-65695327:65693850-65693943:+	chr7:65695142-65695169	NA	0.861	NA	0.978	0.91	0.913	0.931	0.859	0.94	NA	0.98	0.826	NA	NA	0.864	NA	0.953	0.899	NA	0.816	NA	NA	0.894	0.884
A5SS	Zmym5:chr14:56797684-56797830:56797667-56797830:56796603-56796810:-	chr14:56797667-56797684	NA	NA	NA	NA	NA	NA	NA	0.972	NA	NA	NA	NA	NA	NA	NA	NA	NA	NA	NA	NA	NA	0.971	0.979	0.965
SE	Ift74:chr4:94614490-94614651:94617966-94618101:94621853-94621989:+	chr4:94617966-94618101	NA	NA	0.972	NA	0.947	0.981	NA	NA	NA	NA	0.979	0.987	NA	0.976	NA	NA	0.914	0.988	0.981	NA	NA	NA	NA	NA
SE	Tmem38b:chr4:53826044-53826220:53840626-53840783:53848865-53849050:+	chr4:53840626-53840783	NA	NA	0.849	NA	0.951	0.977	0.919	0.965	NA	NA	NA	NA	0.79	0.978	0.881	NA	0.951	NA	NA	NA	NA	0.963	NA	0.966
SE	Serpine1:chr5:137063480-137063564:137064346-137064433:137064860-137064961:-	chr5:137064346-137064433	NA	NA	NA	NA	NA	NA	NA	NA	NA	0.999	NA	NA	NA	NA	NA	NA	NA	NA	NA	NA	NA	NA	NA	NA
A5SS	Kctd17:chr15:78436900-78436994:78436900-78437099:78437583-78437671:+	chr15:78436994-78437099	NA	0.823	NA	NA	NA	NA	NA	NA	NA	NA	NA	NA	NA	NA	0.943	NA	0.923	NA	0.839	NA	NA	NA	NA	NA
A3SS	Magi1:chr6:93694007-93694175:93694007-93694208:93697193-93697487:-	chr6:93694175-93694208	0.551	0.039	NA	NA	NA	NA	NA	0.201	0.12	0.059	0.29	NA	NA	NA	NA	NA	0.093	NA	NA	NA	NA	NA	NA	NA
SE	Arhgef25:chr10:127184886-127184979:127185082-127185172:127185286-127185356:-	chr10:127185082-127185172	NA	NA	NA	NA	NA	NA	NA	NA	NA	NA	0.996	0.997	NA	NA	NA	NA	NA	NA	NA	NA	0.995	NA	NA	NA
SE	R3hdm1:chr1:128181985-128182212:128184399-128184654:128186757-128186909:+	chr1:128184399-128184654	0.895	NA	0.902	NA	0.934	0.923	0.919	0.932	NA	0.976	0.989	NA	0.97	NA	NA	NA	NA	0.945	NA	0.916	NA	NA	NA	NA
SE	Lamb1:chr12:31324175-31324320:31326169-31326377:31326567-31326709:+	chr12:31326169-31326377	NA	NA	NA	0.991	NA	NA	NA	0.994	NA	0.995	NA	NA	NA	NA	0.997	NA	NA	NA	NA	NA	NA	0.997	0.995	NA
SE	Eif5a:chr11:69919150-69919336:69920340-69920422:69920800-69920919:-	chr11:69920340-69920422	0.296	0.268	0.294	0.266	0.219	0.424	0.508	0.426	0.34	0.492	0.37	0.636	0.478	0.151	0.477	0.399	0.217	0.527	0.12	0.221	0.279	0.18	0.488	0.272
SE	Ltc4s:chr11:50237193-50237264:50237340-50237440:50238377-50238471:-	chr11:50237340-50237440	0.988	NA	NA	NA	NA	NA	NA	NA	NA	NA	NA	NA	NA	NA	NA	NA	NA	NA	NA	NA	NA	NA	NA	NA
SE	Slc2a1:chr4:119132442-119132683:119133096-119133259:119133351-119133539:+	chr4:119133096-119133259	NA	NA	NA	NA	0.994	NA	NA	NA	NA	NA	NA	NA	NA	NA	NA	NA	NA	NA	NA	NA	0.964	NA	NA	NA
SE	Raly:chr2:154859677-154859750:154859910-154859958:154861839-154862006:+	chr2:154859910-154859958	0.095	0.098	0.119	0.118	0.073	0.086	0.086	0.079	0.109	0.088	0.071	0.071	0.053	0.065	0.099	0.115	0.118	0.071	0.053	0.112	0.082	0.126	0.083	0.077
SE	Rpl18a:chr8:70895915-70896045:70896132-70896180:70897358-70897399:-	chr8:70896132-70896180	0.999	NA	NA	NA	NA	NA	NA	NA	0.999	NA	NA	NA	NA	NA	NA	NA	NA	0.999	NA	NA	NA	1	NA	NA
A3SS	Luc7l3:chr11:94291138-94293032:94291138-94293278:94295919-94296080:-	chr11:94293032-94293278	NA	NA	NA	NA	0.994	NA	0.986	NA	NA	NA	NA	NA	NA	NA	NA	NA	NA	NA	NA	NA	NA	NA	NA	NA
SE	Ino80c:chr18:24111714-24111782:24112660-24112772:24114076-24114187:-	chr18:24112660-24112772	NA	NA	NA	NA	NA	NA	NA	NA	NA	NA	NA	NA	NA	NA	NA	NA	NA	NA	NA	0.973	NA	NA	NA	NA
SE	Plxna1:chr6:89342950-89343051:89343968-89344109:89354855-89355038:-	chr6:89343968-89344109	NA	NA	NA	0.992	NA	NA	NA	NA	NA	NA	NA	NA	NA	NA	NA	NA	NA	NA	NA	NA	NA	NA	NA	NA
SE	Trdn:chr10:33139073-33139283:33157012-33157174:33175768-33175828:+	chr10:33157012-33157174	0.885	NA	NA	NA	NA	NA	NA	NA	NA	NA	NA	NA	NA	NA	NA	NA	NA	NA	NA	NA	0.961	NA	NA	NA
SE	Nars2:chr7:97031337-97031436:97031545-97031583:97035230-97035297:+	chr7:97031545-97031583	NA	NA	NA	NA	NA	NA	NA	NA	NA	NA	NA	NA	0.923	NA	NA	NA	NA	NA	NA	NA	NA	NA	NA	NA
SE	Cltc:chr11:86733575-86733844:86737070-86737278:86757247-86757565:-	chr11:86737070-86737278	NA	NA	NA	NA	NA	NA	NA	NA	NA	NA	NA	NA	NA	NA	NA	NA	0.998	NA	NA	NA	NA	NA	NA	NA
SE	Ptprk:chr10:28496908-28496945:28551617-28551756:28560004-28560165:+	chr10:28551617-28551756	NA	NA	NA	NA	NA	NA	NA	NA	NA	NA	NA	NA	NA	NA	NA	NA	NA	NA	NA	NA	NA	NA	0.986	NA
SE	Rab2b:chr14:52266189-52266301:52268641-52268734:52275442-52275489:-	chr14:52268641-52268734	NA	NA	NA	0.956	NA	NA	NA	0.921	0.8	NA	NA	NA	NA	0.952	NA	NA	NA	NA	NA	NA	NA	NA	NA	NA
SE	Nqo2:chr13:33964686-33964800:33968189-33968277:33972311-33972476:+	chr13:33968189-33968277	0.951	NA	NA	0.903	NA	NA	0.881	NA	0.978	NA	NA	NA	NA	0.883	0.942	NA	0.925	NA	NA	NA	NA	NA	0.98	NA
SE	Dda1:chr8:71469198-71469325:71469542-71469692:71472040-71472375:+	chr8:71469542-71469692	NA	NA	0.069	NA	NA	NA	NA	NA	NA	NA	NA	NA	NA	NA	NA	NA	NA	NA	NA	NA	NA	NA	NA	NA
SE	Zkscan3:chr13:21394758-21394906:21396099-21396574:21402671-21402716:-	chr13:21396099-21396574	NA	0.986	NA	NA	0.964	NA	NA	0.965	NA	NA	NA	NA	NA	NA	NA	NA	NA	NA	NA	NA	NA	NA	0.986	0.937
A3SS	Iffo1:chr6:125153409-125153502:125153406-125153502:125153041-125153162:+	chr6:125153406-125153409	0.761	0.826	0.642	0.678	0.779	0.662	0.682	0.447	0.571	0.612	0.919	0.642	0.387	0.523	0.725	0.647	0.627	0.519	0.591	0.785	0.56	0.63	0.7	0.605
SE	Vopp1:chr6:57774710-57774788:57789976-57790035:57824926-57825136:-	chr6:57789976-57790035	0.88	0.891	0.896	0.888	0.811	0.901	0.892	0.954	0.936	0.777	0.921	NA	NA	0.93	0.87	0.783	0.909	0.985	0.941	NA	0.886	0.902	0.963	0.857
SE	Alpk1:chr3:127695553-127695752:127729270-127729501:127780160-127780513:-	chr3:127729270-127729501	NA	NA	NA	NA	NA	NA	NA	NA	NA	NA	NA	NA	NA	NA	NA	NA	NA	NA	NA	NA	NA	NA	0.863	NA
SE	Clcn7:chr17:25151115-25151232:25151703-25151758:25152347-25152408:+	chr17:25151703-25151758	NA	NA	NA	NA	NA	NA	NA	NA	NA	NA	NA	0.945	NA	NA	NA	NA	NA	NA	NA	NA	NA	NA	NA	NA
A3SS	Tmem131l:chr3:83900326-83900415:83900326-83900418:83901345-83901466:-	chr3:83900415-83900418	0.934	0.691	NA	0.977	0.959	NA	0.726	0.806	0.971	0.898	0.846	0.834	0.855	0.761	0.683	NA	NA	0.738	NA	0.7	0.838	0.915	0.683	NA
SE	Prkar1a:chr11:109653778-109653961:109659998-109660169:109661034-109661126:+	chr11:109659998-109660169	0.986	0.997	0.999	0.998	0.998	NA	0.996	0.996	0.995	NA	NA	0.999	0.995	NA	0.996	NA	NA	NA	0.998	0.999	0.997	NA	NA	NA
SE	Rangap1:chr15:81704247-81705258:81705452-81705574:81705659-81705748:-	chr15:81705452-81705574	NA	NA	NA	NA	NA	NA	NA	NA	NA	NA	NA	NA	NA	NA	0.982	NA	NA	NA	NA	NA	NA	NA	NA	NA
SE	Rrp12:chr19:41880358-41880501:41882158-41882273:41883422-41883520:-	chr19:41882158-41882273	NA	NA	NA	NA	NA	NA	NA	NA	0.893	NA	NA	NA	NA	NA	NA	NA	NA	NA	NA	NA	NA	NA	NA	NA
A5SS	Tbc1d19:chr5:53830454-53830498:53830454-53830500:53832969-53833045:+	chr5:53830498-53830500	NA	0.954	0.935	0.978	NA	0.987	0.984	NA	0.94	NA	NA	NA	NA	NA	0.94	NA	NA	0.937	0.969	0.985	NA	NA	0.987	NA
SE	Emc3:chr6:113517096-113517179:113517881-113517961:113519914-113519996:-	chr6:113517881-113517961	NA	NA	NA	0.996	NA	NA	NA	NA	NA	NA	NA	NA	NA	NA	NA	NA	NA	0.995	NA	NA	NA	NA	NA	NA
SE	Rnft2:chr5:118242849-118243031:118243880-118243980:118244971-118244992:-	chr5:118243880-118243980	0.374	NA	0.107	NA	NA	0.166	NA	NA	NA	0.545	NA	0.285	0.545	0.374	NA	NA	0.13	NA	NA	0.23	NA	0.333	0.193	NA
SE	4930503L19Rik:chr18:70452212-70453388:70463961-70464064:70467334-70467485:-	chr18:70463961-70464064	NA	NA	NA	0.867	NA	NA	NA	NA	NA	NA	NA	NA	NA	NA	NA	NA	0.842	NA	NA	0.703	0.228	NA	NA	NA
SE	A430005L14Rik:chr4:153957236-153957322:153959748-153959862:153960530-153960992:+	chr4:153959748-153959862	0.986	NA	NA	NA	NA	NA	NA	NA	NA	NA	0.962	NA	0.963	0.962	NA	NA	0.933	0.979	0.967	0.971	0.985	0.982	0.914	0.927
RI	Gabrd:chr4:155385934-155386146:155385934-155387291:155387153-155387291:-	chr4:155386146-155387153	NA	NA	NA	0.34	NA	NA	NA	NA	0.041	NA	NA	NA	NA	NA	NA	NA	NA	NA	NA	0.436	0.659	0.392	NA	NA
SE	Strbp:chr2:37645470-37645691:37647115-37647285:37703191-37703275:-	chr2:37647115-37647285	0.976	0.939	NA	NA	NA	NA	NA	NA	NA	NA	NA	NA	NA	NA	NA	NA	NA	NA	NA	NA	NA	NA	NA	NA
SE	Nsd2:chr5:33864659-33864778:33867576-33867658:33868753-33868878:+	chr5:33867576-33867658	NA	NA	NA	NA	NA	NA	NA	NA	NA	NA	NA	NA	NA	NA	NA	NA	NA	NA	NA	NA	NA	NA	0.944	NA
SE	Cul1:chr6:47516991-47517233:47518164-47518282:47519135-47519212:+	chr6:47518164-47518282	NA	NA	NA	NA	NA	NA	NA	NA	NA	NA	NA	NA	NA	NA	0.994	NA	NA	NA	NA	NA	NA	NA	NA	NA
A3SS	Adam17:chr12:21347296-21347430:21347296-21347449:21349784-21349953:-	chr12:21347430-21347449	0.055	0.106	0.024	0.071	0.126	0.076	0.03	0.045	0.035	0.059	0.09	0.057	0.048	0.097	0.031	0.049	0.046	0.02	NA	0.096	0.093	0.036	0.041	0.045
SE	Fbxo10:chr4:45044715-45044868:45048439-45048576:45051552-45051702:-	chr4:45048439-45048576	NA	NA	NA	NA	NA	NA	NA	NA	NA	NA	NA	NA	NA	NA	NA	NA	NA	0.923	NA	NA	NA	NA	NA	NA
SE	Cep63:chr9:102602841-102603075:102607325-102607439:102613294-102613417:-	chr9:102607325-102607439	NA	NA	NA	NA	NA	NA	NA	NA	NA	NA	NA	NA	0.973	NA	NA	NA	NA	NA	NA	NA	NA	NA	NA	NA
SE	Galnt1:chr18:24269447-24269565:24271585-24271766:24272661-24272801:+	chr18:24271585-24271766	NA	NA	NA	0.946	NA	NA	NA	NA	NA	NA	NA	0.994	NA	NA	0.988	NA	0.987	NA	NA	0.988	NA	0.993	NA	NA
SE	Iqck:chr7:118855774-118855961:118872820-118872894:118876241-118876371:+	chr7:118872820-118872894	NA	NA	0.308	NA	0.8	0.211	0.728	NA	NA	0.401	0.572	0.401	NA	NA	0.471	NA	0.824	NA	0.286	NA	0.728	0.864	0.77	0.551
SE	Trappc9:chr15:73050594-73050723:73052161-73052307:73057921-73058514:-	chr15:73052161-73052307	NA	NA	NA	NA	NA	NA	NA	NA	NA	NA	NA	NA	NA	NA	NA	NA	0.984	NA	NA	NA	NA	NA	NA	NA
SE	Tmem128:chr5:38264896-38264970:38266517-38266550:38267178-38267284:+	chr5:38266517-38266550	NA	NA	NA	NA	NA	NA	NA	NA	NA	NA	NA	NA	NA	NA	0.012	NA	NA	NA	NA	NA	NA	NA	NA	NA
A3SS	Dgkq:chr5:108656045-108656085:108656045-108656131:108656423-108656523:-	chr5:108656085-108656131	0.728	0.954	0.891	0.948	0.829	NA	NA	0.889	0.396	0.894	0.959	NA	NA	0.753	NA	0.728	0.886	0.781	0.971	NA	NA	0.94	0.894	0.936
SE	Dda1:chr8:71469198-71469325:71472036-71472117:71472194-71472246:+	chr8:71472036-71472117	NA	NA	0.994	NA	NA	NA	NA	NA	NA	NA	NA	NA	NA	NA	NA	NA	0.995	NA	NA	NA	NA	NA	NA	0.994
A5SS	Rpap1:chr2:119767911-119768248:119767491-119768248:119764738-119764915:-	chr2:119767491-119767911	NA	0.979	NA	NA	NA	NA	NA	NA	NA	NA	NA	NA	NA	NA	NA	NA	NA	NA	NA	NA	NA	NA	NA	NA
A3SS	Arhgef12:chr9:43008015-43008108:43008015-43008111:43010178-43010253:-	chr9:43008108-43008111	0.512	0.483	0.465	0.618	0.489	0.554	0.471	0.688	0.378	0.348	0.44	0.578	0.451	0.614	0.648	0.489	0.367	0.591	0.623	0.43	0.468	0.561	0.691	0.512
SE	Phf6:chrX:52917165-52917267:52931572-52931706:52931980-52932024:+	chrX:52931572-52931706	NA	NA	NA	NA	NA	NA	NA	NA	NA	NA	NA	NA	NA	NA	NA	NA	NA	NA	NA	0.972	NA	NA	NA	NA
SE	Zeb1:chr18:5761327-5761433:5766391-5768025:5770383-5770564:+	chr18:5766391-5768025	NA	0.994	0.994	NA	NA	NA	NA	NA	NA	NA	NA	NA	NA	NA	NA	NA	NA	NA	NA	NA	NA	NA	NA	NA
SE	Atp6ap2:chrX:12606280-12606334:12606930-12607080:12608834-12608954:+	chrX:12606930-12607080	NA	NA	NA	NA	NA	NA	NA	NA	NA	NA	NA	NA	NA	NA	NA	NA	NA	NA	NA	NA	NA	NA	NA	0.995
A3SS	Adam15:chr3:89344117-89344210:89344117-89344854:89345278-89345363:-	chr3:89344210-89344854	NA	NA	NA	NA	NA	NA	NA	NA	NA	NA	NA	NA	NA	0.965	NA	NA	NA	NA	NA	NA	NA	NA	NA	NA
SE	Lamp2:chrX:38424266-38424431:38425362-38425426:38430917-38431040:-	chrX:38425362-38425426	0.997	NA	NA	NA	NA	NA	NA	NA	0.996	NA	NA	NA	NA	NA	NA	0.994	NA	NA	NA	NA	0.999	NA	NA	NA
SE	Pan3:chr5:147455117-147455188:147466935-147467097:147488110-147488258:+	chr5:147466935-147467097	0.012	0.098	0.029	NA	0.087	0.09	0.077	NA	NA	NA	0.074	0.029	0.043	0.019	NA	NA	NA	NA	0.015	0.087	0.014	NA	NA	0.069
SE	Slc2a8:chr2:32976136-32976280:32981360-32981567:32981957-32982017:-	chr2:32981360-32981567	NA	NA	NA	NA	NA	NA	NA	NA	NA	NA	NA	NA	NA	NA	NA	NA	NA	NA	NA	NA	NA	NA	0.557	NA
A3SS	Trmt1:chr8:84690810-84690947:84690772-84690947:84690516-84690572:+	chr8:84690772-84690810	0.061	0.053	0.107	0.107	0.268	0.091	0.045	0.048	0.148	0.05	0.029	0.104	0.094	0.06	0.047	NA	0.073	0.094	0.067	0.061	0.101	0.075	0.086	0.091
RI	Pxn:chr5:115545371-115545508:115545371-115545805:115545603-115545805:+	chr5:115545508-115545603	0.035	0.009	0.046	0.031	0.035	0.043	0.027	0.04	NA	0.093	NA	0.014	0.034	0.016	0.02	NA	0.035	0.071	NA	0.054	0.042	0.068	0.019	NA
SE	Zfand6:chr7:84634238-84634409:84652881-84653042:84689745-84689883:-	chr7:84652881-84653042	0.073	0.054	0.111	0.055	0.078	0.153	0.061	0.141	0.025	0.068	0.085	0.11	0.111	0.085	0.079	NA	0.094	0.143	0.225	0.049	0.043	0.104	0.043	0.089
SE	Pdia3:chr2:121426594-121426702:121429453-121429583:121431651-121431768:+	chr2:121429453-121429583	NA	NA	NA	NA	0.996	NA	NA	NA	0.999	NA	NA	NA	NA	NA	0.999	NA	NA	NA	NA	0.999	0.997	0.999	NA	NA
SE	H2-T23:chr17:36030821-36031913:36032152-36032422:36032608-36032690:-	chr17:36032152-36032422	NA	NA	NA	NA	NA	0.997	NA	NA	NA	NA	NA	NA	NA	NA	NA	NA	NA	NA	NA	NA	NA	NA	NA	NA
SE	Cdc42bpa:chr1:180117666-180117743:180134296-180134380:180136651-180136724:+	chr1:180134296-180134380	NA	NA	NA	NA	NA	NA	NA	NA	NA	0.972	NA	NA	NA	NA	NA	NA	NA	NA	0.975	0.988	NA	NA	NA	NA
SE	Rab11a:chr9:64725501-64725582:64726623-64726817:64737583-64737730:-	chr9:64726623-64726817	0.979	0.874	0.864	0.979	0.987	0.987	0.926	0.99	0.981	0.97	0.966	0.996	0.943	0.926	0.861	0.917	0.825	0.97	0.879	0.957	0.922	0.866	0.927	0.85
SE	Srfbp1:chr18:52488250-52488971:52490017-52490055:52490443-52491931:+	chr18:52490017-52490055	NA	NA	NA	NA	NA	NA	0.926	NA	NA	NA	NA	NA	NA	NA	NA	NA	NA	NA	NA	NA	NA	NA	NA	NA
SE	Tnnt3:chr7:142504022-142504065:142507749-142507788:142508334-142508353:+	chr7:142507749-142507788	NA	NA	NA	0.995	NA	NA	NA	NA	NA	NA	NA	NA	NA	NA	NA	NA	NA	0.954	NA	NA	NA	NA	NA	NA
SE	Scpep1:chr11:88943796-88943871:88944374-88944530:88947144-88947234:-	chr11:88944374-88944530	NA	0.999	NA	0.998	NA	NA	0.999	0.997	NA	NA	NA	NA	0.998	NA	NA	NA	NA	NA	NA	NA	NA	0.998	NA	NA
SE	Tbc1d31:chr15:57915969-57916116:57919930-57920046:57922956-57923135:+	chr15:57919930-57920046	NA	0.92	0.738	NA	NA	NA	0.936	0.9	NA	0.699	0.95	NA	0.668	NA	0.857	NA	0.912	NA	NA	NA	NA	0.824	0.931	0.938
SE	Etv1:chr12:38783237-38783285:38793170-38793224:38827777-38827907:+	chr12:38793170-38793224	NA	NA	NA	NA	NA	NA	NA	NA	NA	NA	NA	NA	NA	NA	NA	NA	0.957	NA	NA	NA	NA	NA	0.936	0.932
SE	Trps1:chr15:50830828-50831958:50846013-50846942:50889603-50889691:-	chr15:50846013-50846942	NA	NA	NA	NA	NA	NA	NA	NA	NA	NA	NA	NA	NA	NA	NA	NA	NA	NA	NA	0.972	NA	NA	NA	NA
SE	2310020H05Rik:chr13:99078708-99078850:99078932-99079038:99083827-99083924:-	chr13:99078932-99079038	NA	NA	NA	NA	NA	NA	NA	NA	NA	NA	NA	NA	NA	NA	NA	NA	NA	NA	NA	NA	NA	NA	0.369	NA
A3SS	Rps6kb1:chr11:86511588-86511666:86511588-86511887:86512805-86512913:-	chr11:86511666-86511887	NA	NA	NA	NA	0.955	NA	NA	NA	NA	NA	0.933	NA	NA	NA	NA	NA	NA	NA	NA	NA	0.987	0.974	NA	NA
SE	Wwp2:chr8:107545443-107545498:107552276-107552436:107553968-107554102:+	chr8:107552276-107552436	NA	NA	NA	NA	NA	0.995	NA	NA	NA	NA	NA	NA	NA	NA	NA	NA	NA	NA	NA	NA	NA	NA	NA	NA
SE	Nctc1:chr7:142544608-142545383:142555033-142556170:142558404-142558596:-	chr7:142555033-142556170	NA	NA	NA	NA	NA	NA	NA	NA	NA	NA	NA	NA	NA	0.104	NA	NA	NA	NA	NA	NA	0.727	NA	NA	NA
SE	Eif2d:chr1:131163519-131163565:131164402-131164506:131165119-131165209:+	chr1:131164402-131164506	NA	0.978	NA	NA	NA	NA	NA	NA	NA	NA	NA	NA	NA	NA	0.952	NA	NA	NA	0.922	0.967	0.967	NA	NA	0.982
SE	Zfp426:chr9:20476395-20476478:20478132-20478279:20486329-20486425:-	chr9:20478132-20478279	NA	0.964	NA	NA	NA	NA	NA	NA	NA	NA	NA	NA	NA	NA	NA	NA	NA	NA	NA	NA	0.904	NA	NA	NA
SE	Cnot10:chr9:114613623-114613800:114614988-114615110:114617791-114617994:-	chr9:114614988-114615110	NA	0.988	NA	NA	NA	NA	NA	NA	NA	NA	NA	NA	NA	NA	NA	NA	NA	NA	NA	NA	0.989	NA	NA	NA
SE	Rab6a:chr7:100629837-100629943:100631741-100631853:100634644-100634738:+	chr7:100631741-100631853	NA	NA	NA	0.995	NA	NA	NA	NA	NA	NA	NA	NA	NA	NA	NA	NA	NA	NA	NA	NA	NA	NA	NA	NA
SE	Loxl3:chr6:83034172-83034289:83035454-83035797:83037428-83037592:+	chr6:83035454-83035797	NA	0.976	NA	NA	NA	0.991	NA	NA	NA	NA	NA	NA	NA	NA	NA	NA	0.954	0.993	NA	NA	NA	0.979	NA	0.962
A3SS	Dph7:chr2:24965559-24965654:24965556-24965654:24962440-24962810:+	chr2:24965556-24965559	NA	NA	NA	NA	NA	NA	NA	0.831	NA	NA	NA	NA	NA	NA	NA	NA	NA	NA	NA	NA	NA	NA	NA	NA
A5SS	Pts:chr9:50526869-50526949:50524722-50526949:50522528-50522599:-	chr9:50524722-50526869	NA	NA	NA	NA	NA	0.953	NA	NA	NA	NA	NA	NA	NA	NA	NA	NA	NA	NA	0.751	NA	NA	NA	NA	NA
SE	Dock7:chr4:98975872-98976027:98977863-98978033:98984689-98984829:-	chr4:98977863-98978033	NA	NA	NA	NA	NA	NA	NA	NA	NA	NA	0.992	NA	NA	NA	NA	NA	NA	NA	NA	NA	NA	NA	NA	NA
SE	Ube2v1:chr2:167617828-167617977:167629166-167629288:167631939-167631979:-	chr2:167629166-167629288	NA	0.022	NA	0.005	NA	0.026	0.014	0.027	NA	0.018	0.037	0.01	0.402	0.016	NA	NA	0.014	0.035	0.121	NA	0.066	0.005	0.017	0.051
RI	Clic4:chr4:135223463-135223570:135223463-135226149:135226023-135226149:-	chr4:135223570-135226023	0.005	0.004	0.006	0.005	0.006	0.004	0.003	0.005	0.004	0.006	0.006	0.006	0.006	0.005	0.007	0.007	0.003	0.006	0.008	0.006	0.004	0.005	0.005	0.004
A3SS	Bmp1:chr14:70486146-70486272:70486146-70486930:70490019-70490200:-	chr14:70486272-70486930	0.405	0.416	0.398	0.392	0.442	0.456	0.507	0.387	0.406	0.435	0.434	0.403	0.394	0.488	0.311	0.216	0.372	0.374	0.368	0.434	0.371	0.346	0.503	0.355
SE	Hmbox1:chr14:64823168-64823698:64825298-64825370:64825600-64825692:-	chr14:64825298-64825370	NA	NA	0.202	0.101	0.017	0.047	0.055	NA	0.14	0.36	NA	NA	NA	0.217	0.159	NA	0.057	0.063	NA	0.144	0.224	0.252	0.058	0.08
SE	Rnf122:chr8:31111830-31112172:31114573-31114697:31118430-31118531:+	chr8:31114573-31114697	NA	NA	NA	0.023	NA	NA	NA	NA	0.008	NA	NA	0.033	NA	NA	0.024	NA	0.013	NA	NA	0.021	NA	NA	NA	NA
SE	Desi2:chr1:178237911-178237984:178242611-178242705:178244340-178244482:+	chr1:178242611-178242705	NA	NA	NA	NA	NA	NA	NA	NA	NA	NA	NA	NA	NA	NA	NA	NA	NA	NA	NA	NA	NA	NA	0.971	NA
SE	Fam161a:chr11:23019999-23021133:23021493-23021661:23023429-23023529:+	chr11:23021493-23021661	0.702	0.79	0.653	0.414	0.838	NA	0.54	0.664	NA	NA	0.126	0.825	0.505	0.564	0.898	0.671	0.629	0.32	0.864	NA	NA	0.547	NA	0.724
A3SS	Nabp1:chr1:51469819-51469926:51469819-51471411:51472328-51472380:-	chr1:51469926-51471411	NA	NA	NA	NA	NA	NA	NA	NA	NA	NA	0.993	NA	NA	NA	NA	NA	NA	NA	NA	NA	NA	NA	NA	NA
SE	Rbm39:chr2:156177632-156177906:156178879-156178952:156179176-156179240:-	chr2:156178879-156178952	NA	NA	NA	NA	NA	NA	0.957	NA	NA	NA	NA	NA	NA	0.854	NA	NA	0.935	NA	NA	NA	NA	NA	NA	NA
A5SS	Ndst2:chr14:20724747-20724820:20724710-20724820:20724460-20724563:-	chr14:20724710-20724747	0.884	0.873	0.889	0.89	0.941	0.934	0.748	0.861	0.889	0.846	0.881	0.938	0.878	0.941	0.822	NA	NA	0.921	0.546	0.864	0.965	0.935	0.905	0.95
SE	Prdm15:chr16:97797696-97797777:97799053-97799229:97799553-97799637:-	chr16:97799053-97799229	NA	NA	NA	NA	NA	NA	0.825	NA	NA	NA	NA	NA	NA	NA	NA	NA	NA	NA	NA	NA	NA	NA	NA	NA
SE	P4ha2:chr11:54119133-54119327:54120069-54120246:54124656-54124727:+	chr11:54120069-54120246	NA	NA	NA	NA	NA	NA	NA	NA	NA	NA	NA	NA	NA	0.998	NA	NA	NA	NA	NA	NA	NA	NA	NA	NA
SE	Mpdz:chr4:81329426-81329531:81335675-81335874:81348629-81348744:-	chr4:81335675-81335874	NA	NA	NA	NA	NA	NA	NA	NA	NA	NA	NA	NA	NA	NA	NA	NA	NA	NA	NA	NA	NA	NA	0.988	NA
SE	Camkk2:chr5:122758952-122759000:122764259-122764302:122779251-122779281:-	chr5:122764259-122764302	NA	NA	NA	NA	NA	NA	NA	NA	0.868	NA	NA	NA	NA	NA	NA	NA	NA	NA	NA	NA	NA	NA	NA	NA
RI	Bckdk:chr7:127905221-127905290:127905221-127905480:127905369-127905480:+	chr7:127905290-127905369	0.033	0.047	0.062	0.024	0.063	0.041	0.048	0.031	0.09	0.023	0.046	0.066	0.061	0.048	0.052	0.014	0.058	0.043	0.039	0.067	0.025	0.051	0.057	0.095
SE	Ankrd10:chr8:11611582-11615910:11619061-11619297:11628438-11628530:-	chr8:11619061-11619297	0.916	NA	0.988	0.98	NA	0.951	NA	NA	NA	NA	NA	NA	NA	NA	NA	NA	0.977	NA	NA	NA	NA	NA	NA	NA
SE	Uap1l1:chr2:25362662-25362848:25363311-25363384:25363805-25363857:-	chr2:25363311-25363384	NA	NA	0.927	NA	NA	0.975	0.954	0.968	NA	NA	0.97	0.931	NA	0.953	NA	NA	0.958	NA	NA	0.971	NA	NA	NA	NA
A3SS	Engase:chr11:118486447-118486553:118486444-118486553:118485756-118485905:+	chr11:118486444-118486447	NA	0.197	0.457	0.303	0.197	0.37	0.662	NA	NA	NA	0.746	0.831	0.551	NA	0.688	NA	0.495	0.197	0.123	0.246	0.174	0.635	0.269	0.329
RI	Camk2b:chr11:5972631-5972726:5972631-5972888:5972812-5972888:-	chr11:5972726-5972812	0.241	NA	NA	0.023	NA	NA	0.047	NA	NA	0.174	0.137	NA	NA	NA	NA	NA	NA	0.137	NA	0.068	NA	NA	NA	NA
A3SS	Ubr3:chr2:69917079-69917235:69917076-69917235:69914413-69914553:+	chr2:69917076-69917079	0.878	0.888	0.914	0.793	0.788	0.752	0.883	0.68	0.929	0.92	0.945	0.868	0.631	0.774	0.812	0.87	0.945	0.666	0.714	0.771	0.8	0.71	0.743	0.688
SE	Zfp449:chrX:56346399-56346439:56348282-56348728:56353462-56353667:+	chrX:56348282-56348728	0.881	0.565	0.905	0.871	0.667	0.797	NA	0.95	NA	0.929	0.57	0.81	0.856	0.907	0.576	NA	0.834	NA	0.623	0.933	0.556	0.816	0.799	0.91
SE	Mbtd1:chr11:93926221-93926326:93931812-93931895:93932219-93932454:+	chr11:93931812-93931895	NA	NA	NA	NA	NA	NA	NA	0.818	NA	NA	NA	NA	NA	NA	0.911	NA	NA	NA	NA	NA	NA	NA	NA	NA
SE	Nlgn3:chrX:101301784-101302431:101303071-101303131:101307074-101307134:+	chrX:101303071-101303131	NA	NA	NA	NA	NA	NA	0.192	NA	NA	NA	NA	NA	NA	NA	NA	NA	NA	NA	NA	NA	NA	NA	NA	NA
SE	Pgap2:chr7:102210361-102210591:102223378-102223490:102236447-102236554:+	chr7:102223378-102223490	NA	NA	NA	NA	NA	NA	NA	NA	NA	NA	NA	NA	NA	NA	NA	NA	NA	NA	NA	NA	0.907	NA	NA	NA
SE	Eif5a:chr11:69919150-69919336:69920340-69920434:69921162-69921386:-	chr11:69920340-69920434	0.033	0.023	0.024	0.026	0.031	0.016	0.025	0.033	0.036	0.029	0.027	0.019	0.033	0.015	0.019	0.049	0.013	0.027	0.013	0.017	0.028	0.012	0.03	0.016
SE	Tbc1d23:chr16:57198723-57198770:57198858-57198983:57208203-57208327:-	chr16:57198858-57198983	NA	0.938	0.852	0.957	0.94	NA	0.938	0.88	NA	0.833	0.862	0.919	0.941	0.976	NA	0.722	0.918	0.956	0.944	0.958	0.923	0.83	0.975	0.878
SE	Ablim1:chr19:57068859-57068937:57077413-57077497:57079812-57079871:-	chr19:57077413-57077497	0.028	NA	NA	0.376	NA	0.119	0.044	NA	0.15	0.242	NA	0.023	NA	0.038	0.197	NA	NA	0.086	0.39	0.176	0.31	0.299	NA	NA
SE	Fam193b:chr13:55542783-55543789:55555982-55556225:55570774-55571100:-	chr13:55555982-55556225	NA	0.94	NA	NA	NA	NA	NA	NA	NA	NA	NA	NA	NA	NA	NA	NA	NA	NA	NA	NA	NA	NA	NA	NA
SE	Fbf1:chr11:116151018-116151113:116151421-116151517:116152476-116152944:-	chr11:116151421-116151517	NA	NA	NA	NA	NA	NA	NA	0.983	NA	NA	NA	NA	NA	NA	NA	NA	NA	NA	NA	NA	NA	NA	NA	NA
A3SS	Eif4g3:chr4:138120348-138120454:138120345-138120454:138105313-138105436:+	chr4:138120345-138120348	0.765	0.644	0.651	0.738	0.775	0.7	0.692	0.698	0.758	0.577	0.634	0.67	0.655	0.77	0.673	0.727	0.595	0.774	0.65	0.714	0.667	0.703	0.618	0.68
SE	Car5b:chrX:163990424-163990520:163991350-163991469:164000238-164000436:-	chrX:163991350-163991469	NA	NA	NA	NA	NA	NA	NA	0.945	0.996	NA	0.998	0.982	0.932	NA	NA	NA	NA	NA	NA	NA	NA	NA	NA	NA
A3SS	Slc25a22:chr7:141432020-141432139:141432020-141432158:141432662-141432753:-	chr7:141432139-141432158	0.032	0.032	0.022	0.015	0.058	0.017	0.01	NA	0.047	0.013	NA	0.036	0.073	NA	0.034	NA	0.013	0.042	NA	0.053	0.028	0.028	NA	0.06
SE	Ddx31:chr2:28858987-28859094:28859371-28859472:28859868-28860077:+	chr2:28859371-28859472	0.037	0.051	0.086	NA	0.09	0.069	0.051	0.054	0.23	NA	0.047	NA	0.107	0.107	0.049	NA	NA	0.078	NA	0.142	NA	NA	NA	0.041
SE	Tnrc18:chr5:142790063-142790189:142815014-142815445:142817271-142817380:-	chr5:142815014-142815445	NA	0.997	0.997	NA	NA	NA	NA	NA	NA	NA	NA	NA	NA	NA	NA	NA	NA	NA	NA	NA	NA	NA	NA	NA
SE	Cfap126:chr1:171125269-171125350:171125782-171125893:171126033-171126210:+	chr1:171125782-171125893	NA	NA	NA	NA	NA	NA	0.07	NA	0.042	NA	NA	NA	NA	NA	NA	NA	NA	NA	NA	NA	NA	0.16	NA	NA
SE	Dleu2:chr14:61603033-61603806:61625219-61625362:61632436-61632483:-	chr14:61625219-61625362	NA	0.145	0.242	NA	0.131	NA	NA	NA	0.028	0.66	0.078	NA	0.065	0.157	NA	NA	0.122	NA	0.405	NA	NA	NA	NA	NA
SE	Kmt5b:chr19:3802787-3802897:3804394-3804561:3804813-3804833:+	chr19:3804394-3804561	NA	NA	NA	NA	NA	NA	0.985	NA	NA	NA	NA	NA	NA	NA	NA	NA	NA	NA	NA	NA	NA	NA	NA	NA
SE	Yy1:chr12:108812918-108812979:108814605-108814764:108815472-108815564:+	chr12:108814605-108814764	NA	NA	0.993	NA	NA	NA	NA	NA	NA	NA	0.987	NA	NA	NA	NA	NA	NA	NA	NA	NA	NA	NA	NA	NA
SE	Cnot2:chr10:116501191-116501317:116527826-116527949:116581452-116581485:-	chr10:116527826-116527949	NA	NA	NA	NA	NA	NA	NA	NA	NA	NA	NA	NA	NA	NA	NA	NA	NA	NA	NA	NA	NA	NA	NA	0.215
SE	Syndig1:chr2:149830900-149831077:149841002-149841061:149899417-149899751:+	chr2:149841002-149841061	NA	NA	0.193	NA	NA	NA	NA	NA	NA	NA	NA	NA	NA	NA	NA	NA	NA	NA	NA	NA	NA	0.489	NA	NA
SE	Cux1:chr5:136373321-136373459:136392314-136392393:136407979-136408027:-	chr5:136392314-136392393	NA	NA	NA	NA	NA	NA	0.98	NA	NA	NA	NA	NA	NA	NA	NA	NA	NA	NA	NA	NA	NA	NA	0.984	NA
SE	Acvr1:chr2:58500483-58500557:58507276-58507521:58516023-58516300:-	chr2:58507276-58507521	0.117	0.022	0.086	0.201	0.174	0.112	0.274	0.153	0.119	0.019	0.159	0.321	0.014	0.181	0.036	NA	NA	0.147	0.726	0.014	0.169	NA	0.054	0.139
SE	Sh3pxd2b:chr11:32407561-32407666:32408967-32409051:32411456-32411574:+	chr11:32408967-32409051	0.024	NA	NA	0.005	NA	NA	NA	NA	NA	NA	0.006	NA	NA	NA	0.005	NA	0.021	NA	NA	0.004	NA	NA	0.005	0.003
SE	Rnf41:chr10:128428590-128428703:128435312-128435584:128436467-128436603:+	chr10:128435312-128435584	0.97	0.992	0.981	NA	0.978	0.971	0.965	0.972	0.931	0.933	NA	0.869	0.898	0.989	NA	NA	0.949	0.937	0.994	0.971	0.93	0.985	0.904	0.995
SE	Brix1:chr15:10481715-10481759:10483294-10483406:10485734-10485947:-	chr15:10483294-10483406	NA	NA	NA	NA	NA	0.99	NA	NA	NA	NA	0.993	NA	0.99	0.98	NA	NA	NA	NA	NA	NA	NA	0.99	NA	NA
SE	Minar2:chr18:59062509-59062562:59065834-59066989:59072192-59074664:+	chr18:59065834-59066989	NA	0.103	NA	NA	NA	NA	NA	NA	NA	NA	NA	NA	NA	NA	0.146	NA	NA	0.314	NA	NA	NA	0.071	NA	0.103
SE	Phf14:chr6:11926726-11926837:11933252-11934019:11941429-11941574:+	chr6:11933252-11934019	0.978	0.983	0.979	0.772	0.956	0.939	0.84	NA	0.819	0.952	0.942	NA	0.913	NA	0.871	0.884	0.779	0.961	0.959	0.946	0.911	0.96	0.962	0.858
SE	Zfp54:chr17:21423257-21423317:21427331-21427371:21427736-21427828:+	chr17:21427331-21427371	0.441	0.345	0.542	0.136	0.441	NA	0.798	NA	NA	NA	0.542	NA	0.612	NA	0.321	NA	NA	NA	NA	NA	NA	NA	NA	NA
RI	Ppp5c:chr7:17008613-17008712:17008613-17009058:17008992-17009058:-	chr7:17008712-17008992	0.075	0.058	0.054	0.147	0.092	0.083	0.122	0.118	0.096	0.097	0.175	0.12	0.084	0.131	0.057	0.027	0.05	0.026	0.037	0.085	0.091	0.047	0.074	0.095
SE	Rbp4:chr19:38118271-38118484:38124028-38124135:38124295-38124432:-	chr19:38124028-38124135	0.998	NA	NA	0.999	0.994	0.966	NA	NA	NA	NA	0.997	NA	NA	NA	NA	NA	NA	NA	NA	NA	NA	NA	NA	NA
SE	Ccdc136:chr6:29419101-29419383:29419986-29420265:29426624-29426857:+	chr6:29419986-29420265	NA	NA	NA	0.343	NA	NA	0.41	NA	NA	0.635	0.08	0.367	NA	NA	NA	NA	NA	NA	NA	NA	NA	NA	NA	NA
SE	Thoc5:chr11:4910626-4910759:4911434-4911470:4912780-4912858:+	chr11:4911434-4911470	0.079	NA	0.026	0.017	NA	0.028	0.009	NA	0.077	0.034	0.007	NA	NA	0.051	NA	NA	NA	0.014	NA	0.048	0.021	0.023	NA	0.046
SE	Pigx:chr16:32092343-32092485:32096999-32097063:32099654-32099740:-	chr16:32096999-32097063	NA	NA	0.894	NA	NA	NA	NA	NA	NA	NA	NA	NA	NA	0.936	NA	NA	NA	NA	NA	0.895	NA	NA	NA	NA
SE	Sult5a1:chr8:123145341-123145522:123148050-123148145:123148309-123148436:-	chr8:123148050-123148145	NA	NA	NA	0.71	NA	0.81	NA	NA	NA	0.859	NA	NA	NA	NA	NA	NA	0.71	NA	NA	NA	NA	NA	NA	NA
SE	Fam114a2:chr11:57487566-57487620:57490109-57490182:57491919-57492059:-	chr11:57490109-57490182	NA	NA	NA	NA	NA	0.993	NA	NA	NA	NA	NA	NA	NA	0.992	NA	NA	NA	NA	NA	NA	NA	NA	NA	NA
SE	Ggcx:chr6:72414307-72414449:72414671-72414842:72417854-72417938:+	chr6:72414671-72414842	NA	NA	NA	NA	NA	NA	NA	NA	NA	NA	NA	NA	NA	NA	NA	NA	0.996	NA	NA	NA	0.943	NA	NA	NA
A5SS	Cdk11b:chr4:155625530-155625654:155625530-155625773:155626773-155626889:+	chr4:155625654-155625773	0.317	0.334	0.318	0.455	0.339	0.323	0.426	0.42	0.323	0.486	0.46	0.418	0.662	0.472	0.38	0.36	0.323	0.405	0.453	0.379	0.488	0.373	0.316	0.345
RI	Prr14:chr7:127473594-127473716:127473594-127473986:127473796-127473986:+	chr7:127473716-127473796	0.039	0.133	0.091	0.055	0.159	0.09	0.095	0.087	0.038	0.039	0.071	0.077	0.035	0.048	0.095	0.04	0.106	0.052	0.09	0.112	0.077	0.068	0.079	0.06
SE	Ttc21b:chr2:66249394-66249561:66251893-66252004:66252102-66252232:-	chr2:66251893-66252004	NA	NA	0.939	NA	NA	NA	NA	NA	NA	NA	NA	NA	NA	NA	NA	NA	NA	NA	NA	NA	NA	NA	NA	NA
RI	Pif1:chr9:65589004-65589137:65589004-65589604:65589450-65589604:+	chr9:65589137-65589450	NA	NA	NA	NA	NA	NA	NA	NA	NA	NA	NA	NA	NA	NA	NA	NA	NA	0.326	NA	NA	NA	NA	NA	NA
SE	Cmc1:chr9:118075121-118075212:118115339-118115429:118150016-118150177:-	chr9:118115339-118115429	NA	NA	0.972	NA	NA	NA	0.994	0.98	NA	NA	NA	0.989	NA	NA	0.987	NA	NA	NA	NA	NA	NA	NA	NA	NA
SE	Cpa2:chr6:30550744-30550855:30551965-30552056:30554163-30554363:+	chr6:30551965-30552056	NA	NA	NA	NA	NA	NA	NA	NA	NA	NA	NA	NA	NA	NA	NA	NA	NA	NA	NA	0.171	NA	NA	NA	NA
SE	Ythdc2:chr18:44847743-44847879:44850307-44850434:44850635-44850701:+	chr18:44850307-44850434	NA	0.864	0.919	NA	NA	0.955	NA	NA	NA	NA	NA	0.944	NA	NA	0.821	NA	NA	NA	NA	NA	NA	NA	0.856	NA
RI	Plekhg2:chr7:28370237-28370494:28370237-28371042:28370877-28371042:-	chr7:28370494-28370877	NA	NA	NA	0.834	NA	0.797	NA	NA	0.74	NA	NA	0.797	0.818	0.931	NA	NA	0.677	0.767	NA	NA	0.755	NA	NA	NA
SE	Mcm9:chr10:53548496-53548699:53563282-53563457:53596804-53597648:-	chr10:53563282-53563457	NA	NA	NA	NA	NA	NA	NA	0.749	0.235	NA	NA	NA	NA	NA	NA	NA	NA	NA	NA	NA	NA	NA	NA	NA
SE	Elovl1:chr4:118430714-118430905:118431062-118431143:118431265-118431322:+	chr4:118431062-118431143	NA	NA	0.996	NA	NA	NA	NA	NA	NA	NA	NA	NA	NA	NA	NA	NA	NA	NA	0.992	NA	NA	NA	NA	NA
SE	Snx9:chr17:5841328-5841546:5891773-5891899:5899326-5899495:+	chr17:5891773-5891899	NA	NA	NA	NA	NA	NA	NA	NA	NA	NA	NA	NA	NA	NA	NA	NA	NA	NA	NA	0.979	NA	NA	NA	NA
SE	Kidins220:chr12:25040455-25040569:25047893-25047926:25051094-25051226:+	chr12:25047893-25047926	0.025	0.051	0.017	0.055	NA	0.007	0.051	NA	0.015	0.038	0.005	0.018	0.024	0.011	0.034	NA	NA	0.006	NA	0.019	0.04	0.043	0.012	0.037
SE	Slc7a6:chr8:106195361-106195511:106195852-106196036:106196543-106197507:+	chr8:106195852-106196036	0.965	NA	0.986	NA	NA	NA	NA	NA	NA	NA	NA	NA	NA	NA	NA	NA	NA	NA	NA	NA	NA	NA	NA	NA
SE	Zc3h7a:chr16:11151138-11151325:11151865-11151930:11153058-11153263:-	chr16:11151865-11151930	0.885	0.975	0.942	0.948	NA	0.976	NA	0.984	NA	0.965	0.978	0.966	NA	NA	0.926	NA	0.923	0.802	0.952	NA	0.923	0.969	0.962	NA
A5SS	E130307A14Rik:chr10:39640379-39640511:39640275-39640511:39639563-39639766:-	chr10:39640275-39640379	0.848	NA	0.812	NA	0.831	0.855	NA	0.756	0.805	NA	NA	0.812	0.793	NA	NA	NA	NA	NA	NA	0.8	0.907	0.815	0.945	NA
SE	D11Wsu47e:chr11:113687773-113689221:113691728-113691833:113692394-113692502:+	chr11:113691728-113691833	NA	0.858	0.918	0.884	0.936	0.934	NA	NA	0.941	0.951	NA	0.966	NA	NA	NA	NA	NA	NA	0.86	0.738	NA	NA	NA	NA
A3SS	Arhgef11:chr3:87711499-87711542:87710650-87711542:87709563-87709662:+	chr3:87710650-87711499	0.014	0.016	0.02	0.014	0.003	0.058	NA	0.037	0.007	NA	0.03	0.024	0.006	0.063	0.027	NA	0.04	0.02	0.021	0.007	0.01	0.023	0.009	0.012
SE	Gpatch8:chr11:102487499-102487630:102500802-102500946:102507442-102507529:-	chr11:102500802-102500946	NA	NA	NA	NA	NA	NA	NA	NA	NA	NA	NA	NA	NA	NA	NA	NA	NA	NA	NA	0.96	NA	NA	NA	NA
SE	Iqsec2:chrX:152178963-152179090:152180996-152181092:152193865-152194601:+	chrX:152180996-152181092	NA	NA	NA	NA	NA	NA	0.549	NA	NA	NA	0.378	NA	NA	0.233	NA	NA	0.549	NA	NA	NA	NA	0.753	NA	NA
SE	Josd2:chr7:44468071-44468190:44468305-44468417:44468806-44468969:+	chr7:44468305-44468417	0.162	0.191	0.148	0.13	0.177	0.141	0.128	0.173	0.219	0.083	0.369	0.141	0.28	0.203	0.11	0.4	0.113	0.296	0.222	0.222	0.209	0.11	0.198	0.157
SE	Babam2:chr5:31820477-31820672:31831084-31831159:31901054-31901164:+	chr5:31831084-31831159	NA	NA	NA	NA	NA	NA	0.994	0.994	0.982	0.988	0.993	NA	NA	0.938	NA	NA	0.994	0.992	NA	NA	NA	NA	NA	0.994
RI	Ube2d2a:chr18:35799951-35800029:35799951-35800215:35800109-35800215:+	chr18:35800029-35800109	0.03	0.04	0.059	0.037	0.051	0.059	0.054	0.051	0.046	0.021	0.038	0.053	0.101	0.062	0.044	0.019	0.027	0.068	0.113	0.036	0.047	0.032	0.041	0.071
SE	H2-Ke6:chr17:34026850-34027101:34027202-34027295:34027405-34027522:-	chr17:34027202-34027295	NA	NA	NA	NA	NA	NA	NA	NA	NA	NA	NA	NA	NA	NA	NA	NA	NA	NA	NA	0.992	NA	NA	NA	NA
SE	Fancl:chr11:26399648-26399709:26407547-26407648:26422407-26422460:+	chr11:26407547-26407648	NA	NA	NA	NA	NA	NA	0.877	NA	0.827	NA	NA	NA	0.736	0.868	NA	NA	NA	NA	NA	0.544	NA	NA	NA	NA
SE	Gmppa:chr1:75436936-75437034:75438250-75438354:75438841-75438873:+	chr1:75438250-75438354	NA	NA	NA	NA	NA	NA	NA	NA	NA	NA	NA	NA	NA	NA	NA	NA	NA	NA	NA	NA	NA	0.995	NA	NA
SE	Zcchc14:chr8:121603807-121605268:121605349-121605490:121606186-121606317:-	chr8:121605349-121605490	NA	0.989	NA	NA	NA	NA	NA	NA	NA	NA	NA	NA	NA	NA	NA	NA	0.987	0.982	0.992	NA	NA	NA	NA	NA
SE	Rnf150:chr8:82863355-82864490:82990346-82990597:83003574-83003646:+	chr8:82990346-82990597	NA	NA	NA	NA	NA	0.974	NA	0.928	NA	NA	NA	0.974	NA	NA	NA	NA	NA	0.893	NA	NA	NA	NA	NA	NA
SE	Sardh:chr2:27215037-27215185:27218797-27218911:27220642-27220781:-	chr2:27218797-27218911	0.988	NA	0.915	NA	0.987	0.984	NA	0.952	NA	0.93	NA	NA	0.958	NA	NA	NA	NA	0.922	NA	NA	NA	NA	0.979	0.884
A3SS	Ankrd13b:chr11:77473010-77473168:77473010-77473200:77473280-77473411:-	chr11:77473168-77473200	0.133	0.034	0.037	0.066	0.041	0.041	0.057	0.035	NA	0.052	0.138	0.067	NA	0.07	0.098	NA	0.014	NA	0.162	0.05	0.024	0.017	0.099	0.073
SE	Cdk14:chr5:4920114-4922175:4949531-4949595:5010832-5010926:-	chr5:4949531-4949595	NA	NA	NA	NA	NA	NA	NA	NA	NA	NA	NA	NA	NA	NA	NA	NA	NA	NA	NA	0.98	NA	NA	NA	NA
SE	Cnot2:chr10:116501191-116501317:116517316-116517383:116581452-116581465:-	chr10:116517316-116517383	NA	NA	NA	NA	NA	NA	NA	NA	NA	NA	NA	NA	NA	NA	NA	NA	NA	NA	NA	NA	NA	NA	0.58	NA
SE	Usp33:chr3:152381714-152381884:152382910-152382992:152389740-152389831:+	chr3:152382910-152382992	NA	NA	NA	NA	NA	NA	NA	NA	NA	NA	NA	NA	NA	0.937	NA	NA	NA	NA	NA	NA	NA	NA	0.982	NA
SE	Ercc8:chr13:108160634-108160730:108166389-108166491:108169367-108169491:+	chr13:108166389-108166491	0.576	0.566	0.604	0.433	0.842	0.442	0.572	0.714	0.748	0.613	0.72	0.483	NA	0.64	NA	NA	NA	NA	0.757	0.426	0.806	0.735	0.09	0.781
SE	Dock5:chr14:67786272-67786427:67786824-67786883:67790219-67790320:-	chr14:67786824-67786883	NA	NA	NA	NA	NA	NA	NA	NA	NA	NA	NA	NA	NA	NA	NA	NA	NA	NA	NA	NA	NA	NA	NA	0.94
SE	Cxcl5:chr5:90759377-90759560:90759688-90759824:90759966-90760050:+	chr5:90759688-90759824	0.997	0.994	0.99	NA	NA	NA	NA	NA	0.995	NA	NA	NA	NA	0.997	NA	NA	NA	0.999	NA	NA	0.998	NA	NA	NA
SE	Usp34:chr11:23474265-23474389:23484101-23484181:23486817-23486958:+	chr11:23484101-23484181	NA	NA	NA	NA	NA	NA	NA	NA	NA	NA	NA	NA	NA	NA	NA	NA	NA	NA	NA	NA	0.984	NA	NA	NA
A3SS	Dbr1:chr9:99582390-99582462:99582316-99582462:99582021-99582102:+	chr9:99582316-99582390	0.976	0.967	NA	0.977	NA	0.941	0.911	0.979	NA	NA	NA	NA	NA	NA	NA	NA	NA	NA	NA	NA	NA	0.907	0.895	0.968
RI	Sema4c:chr1:36551725-36551838:36551725-36552149:36551926-36552149:-	chr1:36551838-36551926	0.167	0.222	0.201	0.215	0.355	0.34	0.317	0.396	0.101	0.228	0.195	0.234	0.129	0.156	0.127	NA	0.222	0.179	0.212	0.208	0.258	0.173	0.105	0.103
SE	Hdlbp:chr1:93421342-93421429:93423263-93423377:93423769-93423874:-	chr1:93423263-93423377	NA	NA	NA	NA	NA	NA	NA	NA	NA	NA	NA	NA	NA	NA	NA	NA	0.999	NA	NA	NA	NA	NA	NA	NA
SE	Erap1:chr13:74674621-74674783:74675262-74675403:74675824-74675906:+	chr13:74675262-74675403	NA	NA	NA	NA	0.978	NA	NA	NA	NA	NA	NA	NA	NA	NA	NA	NA	NA	NA	NA	NA	NA	NA	NA	NA
SE	Acad10:chr5:121637243-121637394:121639123-121639305:121642611-121642680:-	chr5:121639123-121639305	0.943	0.832	0.783	NA	0.59	NA	0.612	NA	0.802	NA	0.89	0.623	0.643	NA	0.503	NA	0.802	0.529	NA	NA	0.937	0.921	NA	NA
SE	Arhgef25:chr10:127183197-127183409:127183648-127183829:127184011-127184212:-	chr10:127183648-127183829	NA	NA	NA	NA	NA	0.993	0.994	NA	NA	NA	NA	NA	NA	NA	NA	NA	NA	NA	NA	NA	NA	NA	NA	NA
SE	Dctn1:chr6:83198581-83198661:83199187-83199277:83199673-83199970:+	chr6:83199187-83199277	NA	NA	NA	NA	0.993	NA	NA	NA	NA	NA	NA	NA	NA	NA	NA	NA	0.997	NA	NA	0.997	NA	0.992	NA	NA
SE	Ncoa1:chr12:4344396-4344502:4354360-4354509:4416670-4416805:-	chr12:4354360-4354509	NA	0.786	0.968	NA	NA	NA	0.932	0.927	NA	NA	NA	0.829	0.822	NA	0.907	NA	0.953	NA	NA	0.903	NA	NA	0.887	NA
SE	Hbs1l:chr10:21352541-21352610:21354638-21354743:21358312-21358403:+	chr10:21354638-21354743	NA	NA	NA	NA	NA	0.984	NA	NA	NA	NA	NA	NA	0.985	NA	NA	0.922	0.991	NA	NA	NA	NA	NA	0.973	NA
SE	Mreg:chr1:72164071-72164162:72192042-72192202:72212016-72212307:-	chr1:72192042-72192202	NA	NA	NA	0.879	NA	NA	NA	0.659	NA	NA	NA	NA	NA	NA	NA	NA	NA	NA	NA	NA	NA	NA	NA	NA
SE	Dpyd:chr3:118811179-118811267:118897093-118897201:118899166-118899336:+	chr3:118897093-118897201	NA	NA	NA	NA	NA	0.699	NA	NA	NA	NA	NA	NA	NA	NA	NA	NA	NA	NA	NA	NA	NA	NA	NA	NA
SE	Idh1:chr1:65175230-65175368:65179762-65179815:65181627-65181698:-	chr1:65179762-65179815	NA	0.187	NA	0.525	0.721	0.463	0.211	NA	NA	NA	0.648	NA	0.156	NA	NA	0.348	0.508	0.269	0.345	0.356	0.109	0.197	0.141	NA
RI	Snx17:chr5:31195745-31195856:31195745-31196041:31195950-31196041:+	chr5:31195856-31195950	0.072	0.071	0.052	0.081	0.045	0.086	0.063	0.032	0.088	0.104	0.08	0.083	0.103	0.048	0.053	0.075	0.048	0.042	0.026	0.051	0.047	0.067	0.059	0.088
SE	Sgms1:chr19:32158255-32160363:32223508-32223590:32247993-32248009:-	chr19:32223508-32223590	NA	NA	NA	NA	NA	NA	NA	NA	NA	NA	NA	NA	NA	NA	0.986	NA	NA	NA	NA	NA	NA	NA	NA	NA
SE	Zfx:chrX:94102290-94102380:94114195-94114263:94123067-94123109:-	chrX:94114195-94114263	0.651	NA	0.673	0.828	NA	0.921	0.912	0.909	NA	0.857	0.951	0.935	0.76	0.755	NA	0.76	0.846	0.662	0.906	0.654	0.94	0.909	0.833	0.899
SE	Tcf12:chr9:71922651-71922787:71934552-71934660:71943953-71944018:-	chr9:71934552-71934660	NA	NA	NA	NA	NA	0.004	NA	NA	NA	NA	NA	NA	NA	NA	NA	NA	NA	NA	NA	NA	NA	NA	NA	NA
SE	Naf1:chr8:66864537-66864700:66872154-66872258:66877666-66877760:+	chr8:66872154-66872258	NA	NA	NA	NA	NA	NA	NA	NA	NA	NA	NA	NA	NA	NA	NA	NA	0.057	NA	NA	NA	NA	0.024	NA	NA
SE	Apoe:chr7:19696108-19697103:19697478-19697647:19698187-19698253:-	chr7:19697478-19697647	1	NA	NA	0.999	NA	NA	NA	NA	NA	NA	0.998	NA	NA	NA	NA	NA	NA	NA	NA	NA	NA	NA	NA	NA
SE	Kmt5c:chr7:4740155-4740239:4740720-4740818:4741779-4741981:+	chr7:4740720-4740818	NA	0.057	NA	NA	NA	NA	NA	NA	NA	NA	NA	NA	NA	NA	0.118	NA	NA	NA	NA	0.108	0.232	0.099	0.131	0.108
SE	Meg3:chr12:109549652-109549810:109558236-109558320:109571390-109571719:+	chr12:109558236-109558320	0.992	0.993	0.988	0.986	0.989	0.994	0.992	0.995	0.992	0.987	0.984	0.99	0.983	0.992	0.993	NA	NA	0.993	NA	0.994	NA	NA	0.991	0.993
SE	Zfp820:chr17:21823843-21823891:21840604-21840714:21845643-21845772:-	chr17:21840604-21840714	NA	0.76	0.223	NA	NA	0.697	0.277	0.277	NA	0.365	NA	NA	0.801	NA	0.365	NA	NA	0.668	NA	NA	NA	NA	NA	0.742
SE	Ppcdc:chr9:57412652-57414726:57421125-57421221:57434902-57435024:-	chr9:57421125-57421221	NA	NA	NA	NA	NA	NA	NA	NA	NA	NA	NA	NA	NA	NA	NA	NA	0.792	NA	NA	NA	NA	NA	NA	NA
SE	Fbxo34:chr14:47500793-47500870:47504985-47505132:47529174-47529305:+	chr14:47504985-47505132	NA	NA	0.201	NA	0.201	0.201	NA	NA	NA	NA	NA	NA	NA	NA	0.201	NA	NA	NA	NA	NA	NA	0.335	0.43	0.201
A3SS	Fxyd5:chr7:31040182-31040221:31040182-31040257:31041396-31041457:-	chr7:31040221-31040257	NA	0.956	0.965	NA	NA	NA	NA	NA	NA	0.895	NA	NA	0.939	0.948	0.985	NA	0.942	0.982	NA	0.809	NA	0.987	0.942	0.97
SE	Dda1:chr8:71472036-71472246:71473774-71473836:71474487-71474974:+	chr8:71473774-71473836	0.991	0.996	NA	0.988	0.986	0.995	NA	NA	NA	0.987	NA	0.987	NA	NA	0.995	NA	0.998	0.992	NA	0.988	0.996	0.991	0.984	0.99
SE	Mbd1:chr18:74274414-74274561:74274644-74274773:74275147-74275258:+	chr18:74274644-74274773	NA	NA	NA	NA	NA	0.981	NA	NA	NA	NA	NA	NA	NA	NA	NA	NA	NA	NA	NA	NA	NA	NA	NA	NA
SE	Rpl11:chr4:136028625-136028705:136047811-136047853:136051170-136051302:-	chr4:136047811-136047853	NA	NA	NA	NA	NA	NA	NA	NA	NA	NA	NA	NA	NA	NA	NA	NA	NA	NA	NA	NA	NA	NA	NA	0.281
SE	Wdr83:chr8:85079580-85079707:85079788-85079837:85080119-85080225:-	chr8:85079788-85079837	NA	NA	0.988	NA	0.936	NA	NA	NA	NA	0.964	NA	NA	0.966	NA	NA	NA	NA	NA	NA	0.983	NA	NA	NA	NA
SE	Fam192a:chr8:94589310-94589407:94597050-94597108:94601634-94601713:-	chr8:94597050-94597108	0.419	NA	NA	NA	0.419	NA	NA	NA	0.194	NA	NA	0.519	NA	NA	NA	NA	0.419	NA	NA	NA	NA	0.324	NA	NA
SE	Stard3nl:chr13:19367743-19367839:19370249-19370533:19372587-19372665:-	chr13:19370249-19370533	NA	0.987	NA	NA	NA	NA	NA	NA	NA	NA	NA	0.982	NA	NA	0.986	NA	0.967	NA	NA	NA	NA	NA	NA	NA
SE	Ncor2:chr5:125018810-125018990:125019818-125020046:125022870-125022924:-	chr5:125019818-125020046	0.456	0.433	0.481	0.38	0.446	0.389	0.628	0.279	0.6	0.478	0.452	0.319	0.336	0.39	0.399	NA	0.51	0.355	0.613	0.42	0.481	0.372	0.28	0.478
SE	Nars:chr18:64501302-64501434:64501743-64501875:64503507-64503621:-	chr18:64501743-64501875	NA	NA	0.998	NA	NA	NA	NA	NA	NA	NA	NA	NA	NA	NA	NA	NA	NA	NA	NA	NA	NA	NA	NA	NA
SE	Scaper:chr9:55553470-55553522:55556084-55556276:55580206-55580356:-	chr9:55556084-55556276	NA	NA	NA	NA	NA	NA	NA	NA	NA	NA	NA	0.976	NA	NA	NA	NA	NA	NA	NA	NA	NA	NA	NA	NA
A5SS	Chd2:chr7:73441768-73441799:73441585-73441799:73435734-73435978:-	chr7:73441585-73441768	NA	NA	NA	NA	0.971	NA	NA	NA	NA	NA	0.98	NA	0.987	NA	NA	NA	NA	NA	NA	0.94	0.945	NA	NA	NA
SE	Rpn2:chr2:157283582-157283777:157289527-157289623:157290536-157290592:+	chr2:157289527-157289623	NA	NA	0.998	NA	NA	NA	NA	NA	0.996	NA	NA	NA	NA	0.996	0.998	NA	NA	NA	NA	NA	0.995	NA	NA	NA
SE	Luc7l3:chr11:94291138-94293278:94295919-94296080:94296883-94297067:-	chr11:94295919-94296080	NA	NA	NA	NA	NA	NA	NA	NA	NA	NA	NA	NA	NA	NA	NA	NA	0.994	NA	NA	NA	NA	NA	NA	NA
SE	Mysm1:chr4:94960327-94960431:94961702-94961833:94965128-94965871:-	chr4:94961702-94961833	0.837	0.978	NA	0.892	0.882	0.903	NA	0.899	0.803	0.903	NA	NA	NA	0.773	0.97	NA	NA	NA	NA	0.882	0.935	NA	0.964	0.952
SE	Lonrf3:chrX:36342641-36342732:36351001-36351116:36353841-36353963:+	chrX:36351001-36351116	NA	NA	NA	NA	NA	NA	NA	NA	NA	0.693	NA	NA	NA	NA	NA	NA	NA	NA	NA	NA	NA	0.717	NA	NA
SE	Prtn3:chr10:79874475-79874721:79880427-79880593:79881035-79881177:+	chr10:79880427-79880593	0.34	NA	NA	0.262	0.204	0.2	0.426	0.394	0.169	0.173	0.453	0.151	NA	0.68	NA	NA	0.191	0.464	NA	0.497	0.285	NA	0.279	0.191
SE	Smad2:chr18:76241579-76241979:76262439-76262727:76287927-76288121:+	chr18:76262439-76262727	NA	NA	NA	NA	NA	NA	NA	NA	NA	NA	NA	NA	0.909	NA	NA	NA	NA	NA	NA	NA	NA	NA	NA	NA
SE	Pdlim1:chr19:40247291-40249703:40251909-40252061:40271345-40271512:-	chr19:40251909-40252061	NA	NA	NA	NA	NA	NA	NA	NA	NA	0.973	NA	NA	NA	NA	NA	NA	NA	NA	NA	NA	NA	NA	NA	NA
SE	Thsd7a:chr6:12331544-12331690:12331928-12332046:12337251-12337367:-	chr6:12331928-12332046	NA	NA	NA	NA	NA	0.941	NA	NA	NA	0.953	NA	NA	NA	NA	NA	NA	NA	0.918	NA	NA	NA	NA	NA	NA
SE	Kat6b:chr14:21619217-21619299:21621954-21622087:21624832-21624888:+	chr14:21621954-21622087	NA	NA	NA	0.963	NA	0.905	0.964	0.939	0.974	NA	NA	NA	NA	NA	NA	NA	0.944	NA	NA	NA	NA	0.96	NA	NA
SE	Cyb561a3:chr19:10582297-10582496:10586690-10586845:10587821-10587978:+	chr19:10586690-10586845	NA	NA	NA	NA	NA	NA	NA	NA	NA	NA	0.956	NA	NA	NA	NA	NA	NA	NA	NA	NA	NA	NA	NA	NA
SE	Arhgef1:chr7:24917894-24918000:24918519-24919351:24919630-24919776:+	chr7:24918519-24919351	0.43	0.237	0.173	0.573	0.435	0.34	0.345	0.308	0.462	0.357	0.449	0.259	0.434	0.284	0.175	NA	0.269	0.289	0.361	0.451	0.414	0.158	0.329	0.135
SE	Tdrd7:chr4:46007454-46007641:46010789-46010901:46013065-46013268:+	chr4:46010789-46010901	NA	NA	NA	NA	NA	0.969	NA	NA	NA	NA	0.952	NA	NA	NA	NA	NA	NA	NA	NA	NA	NA	NA	NA	NA
SE	Pmm2:chr16:8642737-8642849:8646172-8646264:8648647-8648747:+	chr16:8646172-8646264	NA	0.954	NA	NA	NA	NA	NA	NA	NA	NA	NA	NA	NA	NA	NA	NA	NA	NA	NA	NA	NA	NA	NA	NA
SE	Mfng:chr15:78755881-78756644:78757296-78757382:78759192-78759358:-	chr15:78757296-78757382	NA	NA	NA	0.673	NA	NA	NA	NA	NA	NA	NA	NA	NA	NA	NA	NA	NA	NA	NA	NA	NA	NA	NA	NA
A5SS	5530601H04Rik:chrX:105068570-105068628:105068463-105068628:105066758-105066877:-	chrX:105068463-105068570	0.853	0.818	0.787	0.93	0.947	0.84	0.944	0.803	0.851	0.812	0.816	0.848	0.818	0.977	0.881	NA	0.755	0.832	0.771	0.88	0.934	0.538	0.926	NA
SE	Tecr:chr8:83572840-83573323:83573410-83573455:83574477-83574528:-	chr8:83573410-83573455	NA	NA	NA	NA	0.969	NA	NA	NA	NA	NA	NA	NA	NA	NA	NA	NA	NA	NA	NA	NA	0.996	NA	0.979	NA
SE	Adgrb2:chr4:130005389-130005554:130006751-130006916:130007561-130007726:+	chr4:130006751-130006916	0.192	0.587	0.655	NA	0.487	0.322	NA	NA	0.487	NA	NA	NA	NA	NA	NA	NA	NA	NA	NA	0.635	0.655	NA	0.703	0.587
SE	Msi2:chr11:88347052-88347125:88348783-88348938:88366784-88366847:-	chr11:88348783-88348938	NA	NA	NA	NA	NA	NA	NA	0.98	NA	NA	NA	NA	0.966	0.963	0.976	NA	NA	NA	NA	NA	NA	NA	NA	NA
SE	Kdm1b:chr13:47060752-47060981:47062957-47063142:47064053-47064230:+	chr13:47062957-47063142	NA	NA	NA	NA	NA	NA	NA	NA	0.93	NA	NA	NA	NA	NA	NA	NA	NA	NA	NA	NA	NA	NA	NA	NA
SE	Dync1i2:chr2:71249718-71249852:71250841-71250986:71258083-71258224:+	chr2:71250841-71250986	NA	0.992	0.994	0.993	NA	NA	NA	NA	NA	NA	NA	NA	NA	NA	NA	NA	0.994	NA	0.993	NA	NA	NA	NA	NA
RI	Abca5:chr11:110326559-110326721:110326559-110327936:110327731-110327936:-	chr11:110326721-110327731	0.049	0.041	0.012	NA	NA	NA	NA	NA	0.025	NA	NA	0.31	0.054	0.008	NA	0.325	0.031	NA	NA	NA	NA	NA	NA	NA
SE	Eif4g3:chr4:138156611-138156745:138158390-138158510:138163446-138163617:+	chr4:138158390-138158510	NA	NA	NA	NA	NA	NA	NA	NA	NA	NA	NA	NA	NA	NA	NA	NA	NA	NA	NA	NA	NA	NA	0.984	NA
SE	Limk2:chr11:3360450-3360586:3392916-3393016:3409045-3409174:-	chr11:3392916-3393016	NA	NA	NA	NA	NA	NA	NA	NA	NA	NA	NA	NA	NA	NA	NA	NA	NA	0.803	NA	NA	NA	NA	NA	NA
SE	Rims2:chr15:39585589-39585762:39610063-39610141:39616268-39616410:+	chr15:39610063-39610141	NA	NA	NA	NA	NA	NA	NA	NA	NA	NA	NA	NA	NA	NA	NA	NA	NA	NA	NA	NA	NA	0.496	NA	NA
SE	Mst1r:chr9:107914708-107914927:107915009-107915156:107915236-107915402:+	chr9:107915009-107915156	NA	NA	NA	NA	0.716	NA	NA	NA	NA	NA	NA	NA	NA	NA	NA	NA	NA	NA	NA	NA	NA	NA	NA	NA
SE	Tnnt3:chr7:142504022-142504065:142505515-142505530:142507749-142507788:+	chr7:142505515-142505530	NA	0.845	NA	0.981	NA	NA	0.966	NA	0.957	NA	NA	NA	NA	NA	0.98	NA	NA	0.951	NA	0.972	0.979	NA	0.732	NA
A5SS	Lin54:chr5:100485802-100485855:100485139-100485855:100480197-100480321:-	chr5:100485139-100485802	NA	NA	0.749	NA	NA	NA	NA	0.845	0.801	0.881	0.8	0.876	NA	0.901	0.883	0.787	0.772	0.805	NA	0.858	NA	0.915	NA	NA
SE	Tyms:chr5:30064102-30064186:30068465-30068538:30071633-30071707:-	chr5:30068465-30068538	NA	NA	0.895	NA	0.927	0.96	0.846	NA	NA	NA	0.686	NA	0.963	NA	0.87	NA	NA	NA	NA	NA	NA	NA	NA	NA
SE	Ipo11:chr13:106886666-106886757:106889362-106889406:106891615-106891768:-	chr13:106889362-106889406	NA	NA	NA	NA	NA	NA	NA	NA	NA	NA	NA	NA	NA	NA	NA	NA	NA	NA	NA	NA	NA	NA	NA	0.96
SE	Zfp182:chrX:21060502-21060557:21061474-21061609:21061942-21062043:-	chrX:21061474-21061609	NA	NA	NA	NA	NA	NA	NA	NA	NA	NA	0.087	NA	NA	NA	NA	NA	NA	NA	NA	NA	NA	NA	NA	NA
SE	Adamts14:chr10:61207299-61207463:61211587-61211668:61213123-61213247:-	chr10:61211587-61211668	NA	NA	0.984	NA	NA	NA	NA	NA	NA	NA	NA	NA	NA	NA	NA	NA	0.983	NA	NA	NA	NA	0.979	NA	0.983
SE	Abi3bp:chr16:56631861-56631945:56632828-56632885:56642488-56642560:+	chr16:56632828-56632885	NA	NA	NA	NA	NA	0.897	0.888	NA	NA	NA	NA	NA	NA	NA	NA	NA	NA	NA	NA	NA	NA	NA	NA	NA
SE	Gm16201:chr7:139950439-139950477:139962799-139962886:139975304-139975410:+	chr7:139962799-139962886	0.24	NA	NA	NA	NA	NA	NA	0.174	NA	NA	NA	NA	NA	0.174	NA	NA	NA	0.387	NA	NA	NA	NA	NA	0.387
SE	Snd1:chr6:28527576-28527735:28528912-28529019:28531408-28531499:+	chr6:28528912-28529019	NA	NA	NA	NA	NA	0.995	NA	NA	NA	NA	NA	NA	NA	0.995	NA	NA	NA	NA	NA	NA	NA	NA	0.996	NA
A3SS	Vmn1r90:chr7:14555473-14561932:14555473-14563054:14563291-14563506:-	chr7:14561932-14563054	NA	0.19	NA	NA	NA	NA	NA	NA	NA	NA	NA	NA	NA	NA	NA	NA	NA	NA	NA	NA	NA	0.26	NA	NA
SE	Huwe1:chrX:151801153-151801366:151803175-151803349:151806275-151806407:+	chrX:151803175-151803349	NA	NA	0.893	NA	NA	NA	NA	NA	NA	NA	NA	NA	NA	NA	NA	NA	NA	NA	NA	NA	NA	NA	NA	NA
SE	Wdyhv1:chr15:58152596-58152745:58153579-58153704:58157901-58158233:+	chr15:58153579-58153704	NA	NA	NA	NA	NA	NA	NA	NA	NA	0.964	NA	NA	NA	NA	NA	NA	NA	NA	NA	NA	NA	NA	NA	NA
SE	Tpcn1:chr5:120539002-120539087:120539209-120539278:120539788-120539835:-	chr5:120539209-120539278	0.987	0.972	NA	NA	NA	NA	NA	NA	NA	NA	NA	NA	NA	NA	NA	NA	NA	NA	NA	NA	NA	NA	NA	NA
SE	Traf2:chr2:25537070-25537149:25538844-25539084:25546861-25546910:-	chr2:25538844-25539084	NA	NA	NA	NA	NA	0.735	NA	NA	NA	NA	NA	NA	NA	NA	NA	NA	NA	NA	NA	NA	NA	NA	NA	NA
SE	Marc2:chr1:184833859-184834028:184841253-184841427:184845545-184845571:-	chr1:184841253-184841427	0.995	0.993	NA	NA	0.995	0.996	NA	NA	NA	NA	NA	NA	NA	0.993	NA	NA	NA	NA	NA	NA	NA	NA	NA	NA
SE	4930556M19Rik:chr15:10716647-10716718:10719063-10719429:10720728-10722467:+	chr15:10719063-10719429	NA	NA	0.536	NA	NA	NA	NA	NA	NA	NA	NA	NA	NA	NA	NA	NA	NA	NA	NA	NA	NA	NA	NA	0.278
SE	Kcp:chr6:29502620-29502667:29502777-29502975:29504232-29504309:-	chr6:29502777-29502975	NA	NA	NA	NA	NA	0.811	NA	NA	NA	NA	NA	NA	NA	NA	NA	NA	NA	NA	NA	NA	NA	NA	NA	NA
A3SS	Actr5:chr2:158636026-158636147:158636007-158636147:158635306-158635426:+	chr2:158636007-158636026	0.861	0.771	0.47	0.666	0.747	NA	0.869	0.788	NA	0.666	NA	NA	0.47	0.663	0.881	NA	0.849	0.93	0.92	0.52	0.914	0.689	0.914	0.516
SE	Rin3:chr12:102283047-102283326:102312974-102313182:102325794-102325912:+	chr12:102312974-102313182	NA	NA	NA	0.878	NA	NA	NA	NA	0.839	NA	NA	NA	NA	NA	NA	NA	NA	NA	NA	NA	0.776	NA	NA	NA
SE	Mme:chr3:63328169-63328288:63329649-63329715:63340015-63340150:+	chr3:63329649-63329715	NA	NA	NA	NA	NA	NA	NA	0.999	NA	NA	NA	NA	NA	NA	NA	NA	NA	NA	NA	NA	NA	NA	NA	NA
A3SS	Epb41l1:chr2:156510756-156510881:156510732-156510881:156509131-156509307:+	chr2:156510732-156510756	0.707	0.841	0.805	0.849	0.716	0.858	0.855	0.819	0.801	0.761	0.797	0.773	0.968	0.788	0.802	0.523	0.792	0.73	0.707	0.721	0.675	0.785	0.861	0.892
SE	Sik3:chr9:46198551-46198707:46201999-46202070:46204205-46204349:+	chr9:46201999-46202070	NA	NA	NA	NA	NA	NA	NA	NA	NA	NA	NA	NA	NA	NA	NA	NA	0.987	NA	NA	NA	NA	NA	NA	NA
SE	Kdm5a:chr6:120430059-120430280:120431812-120432223:120438986-120444574:+	chr6:120431812-120432223	NA	NA	NA	NA	NA	NA	NA	NA	0.981	NA	NA	NA	NA	NA	NA	NA	NA	NA	NA	NA	0.942	NA	NA	NA
SE	Gnl3l:chrX:151003533-151003641:151004244-151004285:151014020-151014089:-	chrX:151004244-151004285	NA	0.987	NA	NA	NA	NA	NA	NA	NA	NA	NA	NA	NA	0.988	NA	NA	NA	0.864	NA	NA	NA	NA	NA	NA
SE	Ccdc163:chr4:116710100-116710284:116714015-116714149:116714839-116714954:+	chr4:116714015-116714149	0.76	0.966	0.888	0.769	NA	NA	NA	NA	NA	NA	NA	0.902	NA	NA	0.955	NA	0.836	NA	NA	0.491	NA	NA	0.808	0.873
RI	Rhbdf1:chr11:32212622-32212784:32212622-32212942:32212867-32212942:-	chr11:32212784-32212867	0.057	0.144	0.011	0.073	0.057	0.051	0.096	0.062	0.018	0.058	0.12	0.086	0.111	0.072	0.066	NA	0.121	0.079	0.046	0.079	0.042	0.092	0.065	0.065
SE	Jak2:chr19:29288673-29288801:29294855-29294943:29295641-29295691:+	chr19:29294855-29294943	NA	NA	NA	NA	NA	NA	NA	NA	NA	NA	NA	NA	NA	NA	NA	NA	0.977	NA	NA	NA	NA	NA	NA	NA
SE	Slc35c2:chr2:165278240-165278416:165282080-165282144:165282782-165282862:-	chr2:165282080-165282144	NA	0.958	NA	NA	NA	NA	0.936	NA	0.962	NA	NA	NA	NA	NA	NA	NA	NA	0.799	NA	NA	0.778	NA	NA	NA
A5SS	Palb2:chr7:122128137-122128443:122127048-122128443:122124256-122124927:-	chr7:122127048-122128137	NA	0.546	NA	NA	NA	NA	NA	NA	NA	0.591	NA	NA	NA	NA	NA	NA	0.658	NA	NA	NA	NA	NA	NA	NA
SE	Usp40:chr1:87982008-87982180:87983753-87983835:87985901-87986199:-	chr1:87983753-87983835	NA	NA	NA	NA	NA	NA	NA	NA	NA	NA	NA	NA	0.966	NA	0.986	NA	NA	NA	0.957	NA	NA	NA	NA	NA
SE	Zfp644:chr5:106679679-106679743:106695642-106695699:106696531-106696826:-	chr5:106695642-106695699	NA	NA	0.341	NA	NA	NA	NA	NA	NA	NA	NA	NA	NA	NA	NA	NA	NA	NA	NA	NA	NA	NA	NA	NA
SE	Gorasp2:chr2:70683979-70684103:70688385-70688472:70711039-70711123:+	chr2:70688385-70688472	NA	NA	NA	NA	NA	NA	NA	0.994	NA	NA	NA	NA	NA	NA	NA	NA	NA	NA	NA	NA	NA	NA	0.995	NA
SE	Cenpf:chr1:189682844-189682951:189683767-189683964:189684944-189685138:-	chr1:189683767-189683964	NA	NA	NA	NA	NA	NA	NA	NA	NA	NA	NA	0.866	NA	NA	NA	NA	NA	NA	NA	NA	NA	NA	NA	NA
SE	Slc30a9:chr5:67315725-67315845:67324676-67324733:67326852-67326952:+	chr5:67324676-67324733	0.618	0.675	0.755	0.805	0.692	0.51	0.543	0.56	0.725	0.56	0.685	0.618	0.622	0.613	0.792	0.921	0.711	0.698	0.832	0.629	0.618	0.821	0.79	0.692
SE	Zdhhc20:chr14:57846920-57847062:57856609-57856730:57857627-57857660:-	chr14:57856609-57856730	NA	NA	NA	NA	NA	NA	NA	NA	NA	NA	NA	NA	NA	NA	0.989	NA	NA	NA	NA	NA	NA	NA	NA	NA
A3SS	Pms2:chr5:143911925-143912060:143911920-143912060:143909963-143910079:+	chr5:143911920-143911925	NA	0.772	0.629	0.853	NA	0.68	0.659	0.392	0.708	NA	NA	0.78	0.914	0.326	0.795	NA	0.763	0.897	0.492	NA	0.492	0.492	0.931	0.744
SE	Dph7:chr2:24963022-24963156:24963455-24963543:24965556-24965654:+	chr2:24963455-24963543	NA	NA	NA	NA	NA	NA	NA	NA	NA	NA	NA	NA	NA	0.863	NA	NA	NA	NA	0.79	0.688	NA	NA	NA	NA
RI	Mybbp1a:chr11:72447552-72447639:72447552-72447882:72447729-72447882:+	chr11:72447639-72447729	0.031	0.029	0.058	0.1	0.047	0.031	0.028	0.053	0.013	0.029	0.026	0.057	0.066	0.033	0.028	0.124	0.041	0.016	0.037	0.039	0.041	0.032	0.021	0.059
SE	Ccnyl1:chr1:64700968-64701043:64702345-64702380:64711417-64711453:+	chr1:64702345-64702380	NA	NA	NA	NA	NA	NA	NA	NA	0.932	NA	NA	NA	NA	NA	NA	NA	NA	NA	NA	NA	NA	NA	NA	NA
SE	Abi3bp:chr16:56626666-56626747:56629095-56629155:56631861-56631945:+	chr16:56629095-56629155	NA	NA	NA	NA	NA	0.797	NA	NA	NA	NA	NA	NA	NA	0.781	NA	NA	NA	NA	NA	NA	NA	NA	NA	NA
A3SS	Ndrg4:chr8:95706187-95706293:95706161-95706293:95700112-95700157:+	chr8:95706161-95706187	0.096	0.561	NA	0.06	0.221	0.81	0.176	0.773	0.185	0.561	NA	0.279	NA	0.694	NA	NA	NA	0.124	NA	0.275	0.146	NA	NA	0.895
SE	Erc1:chr6:119722172-119722308:119734080-119734092:119743287-119743481:-	chr6:119734080-119734092	0.04	0.083	0.101	0.048	0.034	0.017	0.018	0.011	0.019	0.012	0.033	0.028	0.011	0.031	0.066	NA	0.012	0.059	0.1	0.044	NA	0.109	0.04	0.054
SE	Polk:chr13:96489181-96489278:96490936-96490969:96493828-96493995:-	chr13:96490936-96490969	NA	NA	0.985	NA	NA	NA	NA	NA	NA	NA	NA	NA	NA	NA	NA	NA	NA	NA	NA	NA	NA	0.971	NA	NA
SE	Btf3l4:chr4:108814294-108816886:108818184-108818244:108819135-108819337:-	chr4:108818184-108818244	NA	NA	NA	NA	NA	0.995	NA	NA	0.987	0.981	NA	NA	NA	NA	NA	NA	NA	NA	NA	NA	NA	NA	0.995	NA
RI	Raf1:chr6:115620208-115620327:115620208-115621862:115621815-115621862:-	chr6:115620327-115621815	0.094	0.121	0.13	0.138	0.117	0.113	0.121	0.09	0.142	0.089	0.098	0.138	0.096	0.146	0.169	0.106	0.159	0.122	0.143	0.135	0.114	0.181	0.15	0.183
SE	Mme:chr3:63341906-63342008:63343496-63343633:63345124-63345253:+	chr3:63343496-63343633	NA	0.986	0.977	0.999	NA	NA	NA	NA	0.994	NA	0.997	0.999	NA	NA	NA	NA	0.95	NA	NA	NA	0.997	NA	0.996	NA
A3SS	Itih4:chr14:30897525-30897573:30897522-30897573:30896557-30896770:+	chr14:30897522-30897525	0.627	NA	NA	0.551	0.475	NA	0.316	NA	0.62	NA	0.595	NA	NA	NA	NA	NA	NA	NA	NA	0.782	0.495	NA	NA	NA
SE	Prrc2c:chr1:162692372-162692624:162692735-162692924:162696277-162696363:-	chr1:162692735-162692924	NA	NA	NA	NA	NA	NA	NA	NA	NA	NA	NA	NA	NA	NA	NA	NA	0.991	NA	NA	NA	NA	NA	NA	NA
SE	Paxip1:chr5:27772003-27772624:27775565-27775679:27781421-27781485:-	chr5:27775565-27775679	NA	NA	NA	NA	NA	NA	NA	NA	NA	NA	NA	NA	0.959	NA	NA	NA	NA	NA	NA	NA	NA	NA	NA	NA
RI	Tbc1d14:chr5:36507577-36507706:36507577-36508431:36508359-36508431:-	chr5:36507706-36508359	0.075	0.014	0.074	0.044	0.039	0.06	0.033	0.036	0.08	0.056	0.05	0.123	0.069	0.021	0.015	NA	0.055	0.152	0.021	0.058	0.117	0.044	0.035	0.02
SE	Ttc14:chr3:33800190-33800436:33800581-33800674:33800955-33801080:+	chr3:33800581-33800674	0.065	0.114	0.073	0.095	0.061	0.066	0.066	0.073	0.09	0.052	0.106	0.113	0.133	0.087	0.064	NA	0.05	0.028	0.39	0.106	0.065	0.021	0.045	0.034
SE	Rbck1:chr2:152326215-152326414:152327246-152327340:152330959-152331104:-	chr2:152327246-152327340	NA	NA	NA	NA	NA	NA	NA	NA	NA	NA	NA	NA	NA	NA	NA	NA	NA	NA	NA	NA	NA	0.994	NA	NA
SE	Itgb5:chr16:33899240-33899402:33902793-33902883:33910464-33910585:+	chr16:33902793-33902883	NA	NA	NA	NA	NA	NA	NA	NA	NA	NA	NA	NA	NA	0.995	NA	NA	NA	NA	NA	NA	NA	NA	NA	NA
SE	Gpr180:chr14:118139736-118139895:118148084-118148285:118157896-118158054:+	chr14:118148084-118148285	NA	0.99	0.975	NA	NA	NA	NA	NA	NA	NA	NA	0.964	NA	NA	NA	NA	NA	NA	0.913	NA	NA	0.98	NA	NA
SE	Rbms2:chr10:128143394-128143552:128145672-128145764:128146601-128146660:-	chr10:128145672-128145764	NA	NA	0.996	NA	NA	NA	0.989	NA	NA	NA	NA	NA	NA	NA	0.996	NA	0.997	NA	NA	NA	NA	0.998	NA	NA
A3SS	Zfp13:chr17:23581056-23581225:23581056-23581270:23585437-23585574:-	chr17:23581225-23581270	NA	0.942	NA	NA	NA	NA	NA	NA	NA	NA	NA	NA	NA	0.891	0.879	NA	NA	NA	NA	NA	0.958	NA	NA	0.915
SE	Mul1:chr4:138437627-138437715:138438241-138438408:138438950-138439011:+	chr4:138438241-138438408	NA	NA	NA	0.944	NA	0.962	NA	NA	NA	NA	NA	NA	NA	NA	NA	NA	NA	NA	NA	NA	NA	NA	NA	NA
SE	Gtf2a2:chr9:70016818-70016923:70017072-70017191:70019388-70019515:+	chr9:70017072-70017191	0.013	0.02	0.009	0.048	0.01	0.014	0.009	0.02	0.007	0.028	0.021	0.006	0.019	NA	0.047	0.014	0.051	0.004	0.013	0.047	0.035	0.018	0.012	0.015
SE	Ppp2r5e:chr12:75485131-75485224:75493413-75493515:75593168-75593332:-	chr12:75493413-75493515	NA	NA	NA	NA	NA	NA	NA	NA	NA	NA	NA	NA	NA	NA	NA	NA	0.959	NA	NA	NA	NA	NA	NA	NA
SE	Gopc:chr10:52354571-52354747:52357341-52357365:52358772-52358937:-	chr10:52357341-52357365	0.24	0.124	0.171	0.184	0.144	0.197	0.262	0.267	0.145	0.437	0.095	0.152	0.22	0.189	0.296	0.024	0.129	0.132	0.173	0.23	0.315	0.31	0.087	0.03
SE	Cep170:chr1:176758396-176758517:176761350-176761500:176769712-176769870:-	chr1:176761350-176761500	0.735	0.661	0.798	0.657	0.708	0.689	0.703	0.773	0.63	0.783	0.597	0.846	0.77	0.769	0.878	0.887	0.862	0.783	0.798	0.776	0.644	0.789	0.73	0.819
SE	Cnot9:chr1:74522317-74522427:74523503-74523613:74526991-74527090:+	chr1:74523503-74523613	NA	0.978	NA	NA	NA	NA	0.99	NA	0.988	NA	NA	NA	NA	0.981	0.955	NA	0.986	0.981	NA	NA	NA	NA	0.984	NA
SE	Tbc1d8b:chrX:139684995-139685310:139700998-139701109:139704601-139704720:+	chrX:139700998-139701109	NA	NA	0.904	0.873	NA	NA	NA	0.841	NA	0.648	NA	0.786	0.855	0.948	0.966	NA	0.825	0.871	0.686	0.845	NA	0.948	0.868	0.894
SE	Sart1:chr19:5382185-5382359:5382714-5382857:5382939-5383073:-	chr19:5382714-5382857	NA	0.978	NA	NA	NA	NA	NA	NA	NA	NA	NA	NA	NA	NA	NA	NA	NA	NA	NA	NA	NA	0.991	NA	NA
SE	Col23a1:chr11:51525951-51525959:51549692-51549719:51551133-51551160:+	chr11:51549692-51549719	0.571	NA	NA	0.944	NA	NA	NA	0.894	NA	NA	0.809	NA	NA	0.679	NA	NA	0.656	0.96	NA	0.961	NA	NA	NA	NA
A3SS	Csnk1e:chr15:79438771-79438855:79438771-79438859:79455489-79455566:-	chr15:79438855-79438859	0.493	NA	0.946	NA	NA	NA	NA	NA	NA	NA	NA	NA	NA	NA	NA	NA	0.951	NA	NA	0.921	NA	0.915	NA	NA
SE	Sephs1:chr2:4884331-4884605:4889182-4889286:4891586-4891694:+	chr2:4889182-4889286	0.987	0.959	0.952	NA	NA	NA	NA	0.982	0.99	NA	0.981	0.995	NA	0.992	NA	NA	0.845	NA	0.948	0.986	NA	0.945	0.968	0.982
SE	Oscp1:chr4:126082881-126082985:126083595-126083724:126084392-126084462:+	chr4:126083595-126083724	NA	NA	NA	NA	NA	0.951	NA	NA	NA	0.933	0.901	NA	NA	NA	NA	NA	NA	NA	NA	0.945	NA	NA	NA	NA
SE	Mpv17l:chr16:13944665-13944736:13946557-13946587:13946751-13946845:+	chr16:13946557-13946587	NA	NA	NA	NA	NA	NA	NA	NA	NA	0.912	NA	NA	NA	NA	NA	NA	NA	NA	NA	NA	NA	NA	0.963	NA
SE	Tsen2:chr6:115547821-115548030:115549912-115549994:115553990-115554027:+	chr6:115549912-115549994	0.965	0.959	0.936	0.946	NA	NA	0.951	0.862	NA	0.871	0.913	NA	0.897	NA	0.96	NA	NA	NA	0.913	0.921	0.965	NA	NA	0.979
SE	Fgfr2:chr7:130218997-130219121:130228622-130228792:130241199-130241277:-	chr7:130228622-130228792	NA	NA	NA	NA	0.996	NA	0.993	NA	NA	NA	NA	NA	NA	0.994	0.985	NA	NA	NA	NA	NA	0.995	NA	NA	NA
RI	Rpl7:chr1:16103167-16103334:16103167-16103684:16103509-16103684:-	chr1:16103334-16103509	0.011	0.013	0.013	0.014	0.018	0.019	0.015	0.014	0.012	0.015	0.011	0.013	0.013	0.014	0.014	0.016	0.014	0.012	0.015	0.014	0.013	0.013	0.014	0.017
SE	Slc39a13:chr2:91063063-91063163:91063319-91063452:91063655-91063706:-	chr2:91063319-91063452	0.984	0.994	NA	NA	0.968	NA	NA	0.99	NA	NA	0.992	0.995	NA	0.983	NA	NA	NA	0.989	NA	NA	NA	NA	NA	NA
SE	Slc30a5:chr13:100826451-100826518:100828899-100829022:100833100-100833340:-	chr13:100828899-100829022	NA	NA	NA	NA	NA	NA	NA	0.984	NA	0.972	NA	NA	NA	0.988	NA	NA	NA	NA	NA	NA	NA	NA	0.981	NA
A3SS	Meis3:chr7:16182319-16182468:16182287-16182468:16182040-16182152:+	chr7:16182287-16182319	0.121	0.067	0.04	0.044	NA	NA	0.024	NA	0.09	0.186	NA	NA	NA	0.148	0.028	NA	0.048	NA	NA	0.049	0.035	NA	NA	0.011
SE	Cyp4f16:chr17:32550252-32550386:32550502-32550567:32550731-32550814:+	chr17:32550502-32550567	NA	NA	NA	NA	NA	NA	NA	NA	0.972	NA	NA	NA	NA	NA	NA	NA	NA	NA	NA	NA	NA	NA	NA	NA
SE	Slc44a2:chr9:21352466-21352551:21353000-21353172:21353681-21353978:+	chr9:21353000-21353172	0.047	0.063	0.05	0.056	0.045	0.027	0.026	0.043	0.054	0.055	0.079	0.035	0.029	0.027	0.044	0.181	0.055	0.042	0.029	0.069	0.101	0.024	0.022	0.039
RI	Shisa5:chr9:109055977-109056093:109055977-109056505:109056286-109056505:+	chr9:109056093-109056286	0.014	0.013	0.015	0.011	0.014	0.011	0.019	0.017	0.017	0.014	0.027	0.01	0.025	0.012	0.014	0.008	0.014	0.014	0.018	0.016	0.018	0.021	0.027	0.019
SE	Npat:chr9:53550037-53550110:53551597-53551638:53552249-53552474:+	chr9:53551597-53551638	NA	NA	0.971	0.883	NA	NA	NA	NA	NA	NA	NA	NA	NA	NA	NA	NA	NA	NA	NA	NA	NA	NA	NA	NA
SE	Hspa9:chr18:34943075-34943285:34945943-34946036:34946495-34946658:-	chr18:34945943-34946036	0.999	NA	NA	NA	NA	NA	NA	NA	NA	NA	NA	NA	NA	NA	NA	NA	NA	NA	NA	NA	NA	NA	NA	NA
SE	Camta2:chr11:70671007-70671079:70671449-70671633:70671883-70672080:-	chr11:70671449-70671633	NA	NA	NA	NA	NA	NA	NA	NA	NA	NA	NA	NA	NA	NA	NA	NA	NA	NA	NA	NA	NA	NA	NA	0.98
SE	Pdlim5:chr3:142304296-142304469:142306283-142306298:142312122-142312214:-	chr3:142306283-142306298	NA	0.003	0.03	NA	NA	NA	0.006	NA	NA	NA	NA	NA	NA	NA	0.012	NA	0.021	NA	0.024	NA	0.002	0.006	NA	0.006
SE	Sirpa:chr2:129608903-129609260:129618456-129618570:129621202-129621227:+	chr2:129618456-129618570	NA	NA	0.911	NA	NA	NA	NA	NA	NA	NA	NA	NA	NA	NA	NA	NA	NA	NA	NA	NA	NA	NA	NA	NA
A5SS	Myo18a:chr11:77815855-77815891:77815855-77815999:77817618-77817706:+	chr11:77815891-77815999	0.225	0.436	0.199	0.162	0.367	0.199	NA	NA	NA	0.465	NA	NA	NA	0.199	0.142	0.367	NA	0.436	0.055	0.504	NA	0.635	NA	NA
SE	Snrpf:chr10:93584029-93584094:93587997-93588123:93589538-93589706:-	chr10:93587997-93588123	NA	NA	0.998	NA	NA	NA	NA	NA	NA	NA	NA	NA	NA	NA	NA	NA	NA	NA	NA	NA	NA	NA	NA	NA
SE	Rhoc:chr3:104792564-104792685:104792899-104793030:104793869-104794282:+	chr3:104792899-104793030	NA	NA	0.999	NA	0.998	NA	NA	NA	NA	NA	NA	NA	NA	NA	NA	NA	NA	NA	NA	NA	NA	NA	NA	NA
RI	Dnajc12:chr10:63395784-63395863:63395784-63397378:63397238-63397378:+	chr10:63395863-63397238	0.016	NA	0.068	NA	0.03	NA	0.03	NA	0.047	0.032	NA	0.027	0.007	0.027	0.012	NA	0.013	0.089	0.014	0.016	0.021	0.035	0.029	0.011
SE	Ssr4:chrX:73789799-73789874:73790030-73790120:73790653-73790811:+	chrX:73790030-73790120	NA	NA	NA	NA	NA	NA	NA	NA	NA	NA	NA	NA	NA	NA	NA	0.964	NA	NA	NA	NA	0.987	NA	NA	NA
SE	D230025D16Rik:chr8:105239977-105240072:105240840-105240938:105241026-105241139:+	chr8:105240840-105240938	0.968	0.937	0.969	NA	NA	0.933	NA	0.92	0.959	0.963	0.982	NA	NA	0.948	0.98	NA	0.965	NA	0.858	NA	NA	0.969	0.98	0.919
SE	Hbs1l:chr10:21358731-21358840:21364674-21364775:21367641-21367786:+	chr10:21364674-21364775	NA	NA	NA	0.992	NA	NA	0.991	0.981	0.989	NA	NA	NA	NA	0.98	NA	NA	NA	NA	0.984	NA	0.976	NA	NA	0.991
SE	Dgcr8:chr16:18284591-18284696:18285100-18285308:18289102-18289231:-	chr16:18285100-18285308	0.038	0.077	0.044	NA	0.014	0.047	0.028	0.054	0.019	0.115	0.047	NA	0.047	0.054	0.094	NA	0.023	0.046	0.223	0.075	0.032	0.031	0.028	0.043
SE	Ebf2:chr14:67414362-67414548:67423952-67424120:67428090-67428687:+	chr14:67423952-67424120	NA	NA	0.809	NA	NA	NA	NA	NA	NA	NA	NA	NA	NA	NA	NA	NA	NA	NA	NA	NA	NA	NA	NA	NA
RI	Engase:chr11:118485756-118485905:118485756-118486553:118486444-118486553:+	chr11:118485905-118486444	NA	0.673	0.148	0.14	NA	0.067	0.544	NA	NA	NA	0.088	0.08	NA	NA	0.088	NA	0.634	0.464	0.565	0.494	0.591	0.118	0.224	0.224
SE	Btrc:chr19:45363832-45363886:45456532-45456610:45471014-45471104:+	chr19:45456532-45456610	NA	0.911	0.766	NA	0.926	0.691	0.938	NA	0.94	0.855	NA	0.734	0.677	0.772	0.724	0.257	0.918	0.766	0.887	0.887	0.908	NA	0.887	0.952
SE	Exosc9:chr3:36561102-36561191:36562017-36562164:36563072-36563257:+	chr3:36562017-36562164	NA	NA	NA	NA	NA	NA	NA	NA	NA	NA	NA	NA	NA	NA	NA	NA	NA	0.982	NA	NA	NA	0.994	NA	NA
SE	Cct8:chr16:87485579-87485744:87485833-87485905:87486235-87486351:-	chr16:87485833-87485905	NA	NA	NA	NA	NA	NA	NA	0.993	NA	NA	NA	NA	NA	0.998	NA	NA	NA	NA	NA	NA	NA	NA	NA	NA
SE	Tcf3:chr10:80415161-80415288:80415364-80415523:80415852-80415926:-	chr10:80415364-80415523	0.993	NA	NA	NA	NA	NA	0.938	0.993	NA	NA	NA	NA	NA	0.989	NA	NA	NA	NA	NA	0.978	0.961	NA	NA	NA
SE	Map2k4:chr11:65756268-65756371:65775732-65775765:65788135-65788285:-	chr11:65775732-65775765	0.105	0.137	0.309	0.177	0.38	0.141	0.17	0.096	0.053	NA	0.024	0.069	NA	0.078	0.345	0.44	0.208	0.148	0.301	0.211	0.144	0.186	NA	0.068
SE	Nedd4:chr9:72726410-72726530:72730901-72730973:72731221-72731276:+	chr9:72730901-72730973	0.998	NA	NA	0.999	NA	NA	1	0.998	NA	0.999	1	NA	NA	NA	NA	NA	NA	NA	NA	NA	1	0.999	0.998	0.998
SE	Slco1a4:chr6:141839527-141839660:141841257-141841399:141845408-141845468:-	chr6:141841257-141841399	NA	NA	NA	0.738	NA	NA	NA	NA	NA	NA	NA	NA	NA	NA	NA	NA	NA	NA	NA	NA	NA	NA	NA	NA
SE	Fam229b:chr10:39118818-39119034:39122176-39122332:39132246-39132378:-	chr10:39122176-39122332	NA	NA	NA	NA	NA	NA	NA	NA	NA	NA	NA	NA	0.893	NA	0.109	NA	NA	NA	NA	NA	NA	NA	NA	NA
SE	Lcn2:chr2:32385955-32386041:32387027-32387164:32387579-32387722:-	chr2:32387027-32387164	NA	NA	NA	NA	NA	0.906	NA	NA	NA	NA	NA	NA	NA	NA	NA	NA	NA	NA	NA	NA	NA	NA	NA	NA
A3SS	Clptm1:chr7:19662144-19662233:19662144-19662342:19664933-19664955:-	chr7:19662233-19662342	NA	0.634	0.698	NA	NA	0.366	NA	NA	NA	0.265	NA	0.902	NA	0.743	NA	NA	NA	0.366	NA	0.669	0.722	NA	0.634	NA
SE	Vps13a:chr19:16668597-16668701:16676045-16676206:16677853-16677979:-	chr19:16676045-16676206	NA	0.812	NA	NA	NA	NA	NA	NA	NA	0.941	0.8	NA	NA	NA	NA	NA	NA	0.926	NA	NA	NA	NA	NA	NA
SE	Prrc2a:chr17:35158935-35159413:35159779-35159990:35160096-35160187:-	chr17:35159779-35159990	NA	NA	NA	NA	NA	NA	NA	NA	NA	NA	NA	NA	NA	NA	NA	NA	0.997	NA	NA	NA	NA	NA	NA	NA
SE	Ccny:chr18:9377793-9377828:9386734-9386809:9449517-9449686:-	chr18:9386734-9386809	0.994	0.979	0.975	NA	0.963	NA	0.985	0.984	0.975	0.965	0.937	0.984	0.974	0.986	NA	NA	NA	NA	0.984	0.98	0.994	NA	NA	0.973
A5SS	Mrps23:chr11:88204423-88204485:88204423-88204713:88205188-88205359:+	chr11:88204485-88204713	NA	0.016	NA	0.024	NA	0.014	0.033	0.027	0.041	0.053	0.025	0.008	NA	0.029	0.034	NA	0.003	0.038	NA	0.027	0.085	0.003	0.006	NA
SE	Sulf2:chr2:166075771-166075805:166077517-166077641:166079036-166079179:-	chr2:166077517-166077641	NA	NA	NA	NA	NA	NA	NA	NA	NA	NA	NA	NA	NA	NA	NA	NA	NA	NA	NA	NA	NA	0.982	NA	NA
SE	Atg10:chr13:91022569-91022667:91040849-91040988:91154216-91154312:-	chr13:91040849-91040988	0.91	0.909	0.93	0.908	0.93	0.902	0.916	0.905	0.646	0.88	0.913	0.905	0.892	0.975	NA	NA	0.861	0.97	NA	0.968	0.818	NA	0.838	NA
A5SS	Trp53i11:chr2:93196896-93196978:93196896-93196979:93197461-93197748:+	chr2:93196978-93196979	NA	0.149	NA	NA	NA	NA	NA	NA	NA	NA	NA	NA	NA	NA	NA	NA	NA	NA	NA	NA	NA	NA	NA	NA
SE	Zfc3h1:chr10:115409092-115409242:115410528-115410703:115411198-115411330:+	chr10:115410528-115410703	NA	0.99	NA	0.969	NA	NA	0.971	NA	NA	NA	NA	NA	NA	0.972	NA	NA	NA	NA	NA	NA	0.952	NA	NA	NA
SE	Spg21:chr9:65480378-65480487:65481860-65481968:65484441-65484582:+	chr9:65481860-65481968	0.988	0.984	NA	NA	0.974	NA	NA	NA	NA	NA	NA	0.996	NA	NA	NA	NA	NA	0.992	NA	NA	NA	NA	NA	NA
SE	Kmt2e:chr5:23498268-23498294:23498887-23499002:23499281-23499592:+	chr5:23498887-23499002	0.037	0.022	0.25	0.078	0.063	0.064	0.079	0.02	0.044	0.012	0.054	0.084	0.018	0.053	0.055	0.189	0.158	0.018	0.14	0.039	0.038	0.158	0.05	0.036
SE	Zbtb10:chr3:9278253-9278352:9279955-9280132:9280290-9280463:+	chr3:9279955-9280132	0.928	NA	NA	0.865	NA	NA	NA	NA	NA	NA	NA	NA	NA	0.886	NA	NA	NA	NA	0.813	NA	NA	NA	NA	NA
SE	Prrg1:chrX:78520803-78520821:78535417-78535499:78561559-78561644:-	chrX:78535417-78535499	0.177	NA	NA	0.055	NA	0.244	NA	NA	NA	NA	NA	NA	NA	NA	NA	NA	NA	NA	NA	NA	NA	NA	NA	NA
SE	Esrp1:chr4:11332037-11333473:11338721-11338831:11344111-11344262:-	chr4:11338721-11338831	NA	NA	NA	0.697	NA	NA	NA	NA	NA	NA	NA	NA	NA	NA	NA	NA	NA	NA	NA	NA	NA	NA	NA	NA
SE	Atp9b:chr18:80762061-80762232:80762873-80762957:80765022-80765115:-	chr18:80762873-80762957	NA	NA	NA	NA	NA	NA	NA	NA	NA	NA	NA	NA	NA	NA	NA	NA	NA	NA	NA	NA	NA	NA	NA	0.991
SE	Nox4:chr7:87246648-87246902:87247487-87247583:87295783-87295894:+	chr7:87247487-87247583	NA	NA	NA	NA	NA	NA	0.846	NA	NA	NA	NA	NA	NA	NA	NA	NA	NA	NA	NA	NA	NA	NA	NA	NA
RI	Adam17:chr12:21329053-21329132:21329053-21330163:21330032-21330163:-	chr12:21329132-21330032	0.064	0.039	0.039	0.048	0.058	0.051	0.069	0.038	0.079	0.07	0.068	0.029	0.058	0.039	0.024	0.064	0.02	0.04	0.023	0.084	0.061	0.024	0.043	0.036
RI	Ino80e:chr7:126857225-126857342:126857225-126857787:126857675-126857787:-	chr7:126857342-126857675	0.105	0.127	0.08	0.121	0.092	0.103	0.107	0.032	0.165	0.039	0.072	0.144	0.228	0.067	0.079	NA	0.093	0.124	0.069	0.084	0.168	0.062	0.159	0.092
SE	Zfp825:chr13:74482816-74482943:74483898-74484022:74493849-74493992:-	chr13:74483898-74484022	0.831	0.45	0.63	0.522	0.45	0.6	0.706	0.766	0.744	0.887	0.45	0.831	0.044	0.8	0.722	NA	0.675	0.593	0.29	0.656	0.551	0.621	0.947	0.483
A3SS	Meis3:chr7:16179001-16179100:16178950-16179100:16178744-16178795:+	chr7:16178950-16179001	0.777	0.851	0.728	0.71	0.777	0.891	0.783	0.299	0.741	0.651	0.777	0.891	0.676	0.856	0.85	0.598	0.817	0.87	0.814	NA	0.839	0.777	0.958	0.569
SE	Papolg:chr11:23885490-23885572:23890228-23890295:23891742-23891904:-	chr11:23890228-23890295	NA	NA	NA	NA	NA	NA	NA	NA	NA	NA	0.873	NA	NA	NA	NA	NA	NA	NA	NA	NA	NA	NA	NA	NA
SE	Hcfc2:chr10:82734349-82734481:82738278-82738464:82738979-82739265:+	chr10:82738278-82738464	0.982	0.931	0.884	0.907	NA	0.975	0.982	NA	0.845	0.9	NA	0.973	0.919	NA	NA	0.871	0.93	NA	0.973	0.98	NA	0.979	0.964	0.941
SE	Srek1:chr13:103763881-103764006:103764295-103764419:103769316-103769348:-	chr13:103764295-103764419	0.214	0.3	0.314	0.214	0.188	0.136	0.3	0.105	0.226	0.191	NA	0.245	0.09	0.148	0.205	0.229	0.209	0.227	0.506	NA	0.238	0.404	0.081	0.328
SE	Mdm2:chr10:117701564-117701614:117702201-117702335:117705154-117705229:-	chr10:117702201-117702335	NA	0.993	NA	NA	NA	NA	NA	NA	NA	NA	NA	NA	NA	NA	NA	NA	NA	NA	0.998	NA	NA	NA	NA	0.997
SE	Ifi203:chr1:173936517-173936639:173937741-173938026:173942229-173942294:-	chr1:173937741-173938026	NA	NA	NA	0.733	NA	0.892	NA	NA	0.834	0.928	NA	0.918	0.924	0.791	NA	NA	NA	0.866	NA	0.85	0.643	NA	0.906	NA
SE	Gm13986:chr2:118071729-118071842:118072142-118072252:118110696-118111202:-	chr2:118072142-118072252	NA	NA	NA	NA	NA	NA	0.697	NA	NA	NA	NA	NA	NA	NA	NA	NA	NA	NA	NA	NA	NA	NA	NA	NA
RI	Ank1:chr8:23132096-23132483:23132096-23132634:23132561-23132634:+	chr8:23132483-23132561	NA	NA	NA	NA	NA	NA	NA	NA	NA	NA	NA	NA	0.568	NA	NA	NA	NA	NA	NA	NA	NA	NA	NA	NA
SE	Slc26a8:chr17:28652447-28652509:28653831-28653945:28659592-28659675:-	chr17:28653831-28653945	NA	NA	NA	NA	NA	NA	NA	0.531	NA	NA	NA	NA	NA	NA	NA	NA	NA	NA	NA	NA	NA	NA	NA	NA
SE	Tnfrsf1b:chr4:145224251-145224484:145224811-145224905:145225329-145225482:-	chr4:145224811-145224905	NA	NA	NA	NA	0.931	NA	NA	NA	NA	NA	NA	NA	NA	NA	NA	NA	NA	NA	NA	NA	NA	NA	NA	NA
SE	Washc4:chr10:83588156-83588304:83590290-83590387:83590986-83591183:+	chr10:83590290-83590387	NA	NA	NA	NA	NA	NA	NA	0.978	NA	NA	NA	NA	NA	NA	NA	NA	NA	NA	NA	NA	NA	NA	NA	NA
A5SS	Serpinh1:chr7:99353052-99353114:99352881-99353114:99351823-99351867:-	chr7:99352881-99353052	0.31	NA	NA	NA	0.167	NA	0.228	NA	0.379	NA	NA	NA	NA	NA	NA	NA	0.208	NA	NA	0.312	NA	NA	0.175	0.172
SE	Tcf12:chr9:72000415-72000518:72006700-72006762:72015637-72015711:-	chr9:72006700-72006762	0.103	0.11	0.092	0.112	0.15	0.09	0.086	0.098	0.108	0.076	0.095	0.13	0.1	0.154	0.084	0.272	0.078	0.118	0.084	0.069	0.093	0.08	0.031	0.094
SE	Dhx35:chr2:158826304-158827999:158829502-158829661:158831661-158831872:+	chr2:158829502-158829661	NA	NA	NA	NA	NA	NA	NA	NA	NA	NA	NA	NA	NA	NA	NA	NA	0.958	NA	NA	NA	NA	NA	NA	NA
SE	Fbxo6:chr4:148145715-148146185:148146320-148146456:148146839-148146935:-	chr4:148146320-148146456	NA	NA	NA	NA	NA	NA	NA	NA	NA	0.988	0.977	0.976	NA	NA	NA	NA	NA	NA	NA	NA	NA	NA	NA	NA
SE	Plekha5:chr6:140526456-140526561:140528560-140528633:140534461-140534562:+	chr6:140528560-140528633	NA	NA	0.965	NA	NA	NA	0.966	NA	0.944	NA	NA	0.935	NA	NA	NA	NA	NA	NA	NA	NA	0.959	NA	0.961	NA
RI	Wtip:chr7:34118936-34118999:34118936-34119206:34119138-34119206:-	chr7:34118999-34119138	0.188	0.087	0.104	0.158	0.212	0.156	0.186	0.138	0.232	0.115	0.277	0.099	0.18	0.2	0.086	0.056	0.092	0.244	0.116	0.272	0.299	0.131	0.172	0.079
SE	Mir100hg:chr9:41402123-41402263:41475005-41475153:41488193-41488268:+	chr9:41475005-41475153	NA	0.429	NA	NA	NA	NA	NA	NA	NA	NA	NA	NA	NA	NA	NA	NA	NA	NA	NA	NA	NA	NA	NA	NA
SE	Foxn2:chr17:88440710-88440884:88462712-88463263:88475855-88475950:+	chr17:88462712-88463263	0.862	NA	NA	NA	NA	0.95	NA	0.933	NA	NA	NA	0.803	NA	NA	NA	NA	NA	NA	NA	NA	NA	NA	NA	NA
SE	Zfp950:chr19:61117273-61117288:61118226-61118347:61127006-61127067:-	chr19:61118226-61118347	0.713	NA	0.084	0.589	0.607	0.509	0.565	0.824	NA	0.832	0.659	0.603	0.592	0.317	NA	NA	NA	0.688	0.155	0.525	0.482	NA	0.696	NA
SE	Dbi:chr1:120116009-120116448:120119894-120120012:120120944-120121047:-	chr1:120119894-120120012	NA	NA	NA	NA	NA	NA	NA	NA	NA	0.998	NA	NA	NA	NA	NA	NA	NA	NA	NA	NA	NA	NA	NA	NA
SE	Ipo9:chr1:135385926-135386003:135386218-135386320:135386683-135386806:-	chr1:135386218-135386320	NA	NA	NA	NA	0.977	NA	NA	NA	NA	NA	NA	NA	NA	NA	NA	NA	NA	NA	NA	NA	NA	NA	NA	NA
SE	Ica1:chr6:8754588-8754751:8758365-8758458:8778071-8778154:-	chr6:8758365-8758458	NA	NA	NA	NA	NA	NA	NA	NA	NA	NA	NA	NA	NA	NA	NA	NA	NA	NA	NA	0.683	NA	NA	NA	NA
SE	Usf2:chr7:30955105-30955193:30955289-30955440:30955799-30956000:-	chr7:30955289-30955440	NA	NA	NA	0.996	NA	NA	NA	NA	NA	NA	NA	0.993	NA	0.993	NA	NA	NA	0.992	NA	0.986	NA	NA	0.993	NA
SE	Fxr1:chr3:34064973-34065054:34068160-34068252:34068916-34069342:+	chr3:34068160-34068252	0.968	NA	0.955	0.961	NA	NA	0.975	NA	0.99	NA	0.929	NA	NA	NA	0.975	0.945	NA	0.948	0.977	0.941	0.958	NA	NA	NA
A3SS	Cbll1:chr12:31492078-31492176:31492078-31492179:31494581-31494749:-	chr12:31492176-31492179	0.71	0.87	0.887	0.662	0.45	0.869	0.821	NA	0.756	NA	0.903	0.946	0.246	0.821	0.949	NA	0.691	NA	NA	0.766	0.595	0.823	NA	0.774
SE	Ptprd:chr4:76050326-76050439:76054588-76054600:76059668-76059829:-	chr4:76054588-76054600	NA	NA	0.021	NA	0.02	NA	NA	NA	NA	NA	NA	NA	NA	NA	NA	0.05	NA	NA	NA	NA	NA	NA	NA	NA
A5SS	Slc6a8:chrX:73679918-73680047:73679918-73680056:73680131-73680234:+	chrX:73680047-73680056	NA	0.981	0.996	0.959	NA	NA	NA	NA	NA	0.936	NA	NA	NA	NA	NA	NA	NA	NA	0.987	NA	0.944	0.994	NA	0.991
SE	Ubr1:chr2:120900500-120900650:120901601-120901695:120903993-120904199:-	chr2:120901601-120901695	NA	NA	NA	NA	NA	NA	NA	NA	NA	0.918	NA	NA	NA	0.978	NA	NA	NA	NA	NA	NA	NA	NA	NA	NA
SE	Cct7:chr6:85451513-85452127:85459114-85459268:85459941-85460048:+	chr6:85459114-85459268	NA	NA	NA	NA	NA	NA	NA	NA	NA	NA	NA	NA	NA	NA	0.991	NA	NA	NA	NA	NA	NA	NA	NA	NA
SE	Crem:chr18:3325360-3325478:3327493-3327591:3337379-3337488:-	chr18:3327493-3327591	0.644	0.083	0.157	0.256	0.514	NA	0.245	0.707	0.879	0.376	0.287	0.816	NA	0.376	0.475	NA	0.376	0.266	0.743	0.547	0.108	0.458	0.188	0.194
A3SS	Rbpjl:chr2:164405753-164405879:164405135-164405879:164404458-164405015:+	chr2:164405135-164405753	NA	NA	NA	NA	NA	NA	NA	NA	NA	NA	0.674	NA	0.437	NA	NA	NA	NA	NA	NA	NA	NA	NA	0.608	NA
SE	Phactr1:chr13:43133926-43134003:43134102-43134323:43135173-43135359:+	chr13:43134102-43134323	NA	NA	NA	NA	NA	NA	NA	NA	NA	NA	NA	NA	0.103	NA	NA	NA	NA	NA	NA	NA	NA	NA	0.287	NA
SE	Traf7:chr17:24514712-24514866:24516504-24516596:24518741-24518794:-	chr17:24516504-24516596	0.969	NA	NA	NA	NA	NA	NA	NA	0.979	NA	NA	NA	NA	NA	NA	NA	NA	NA	NA	NA	0.918	NA	NA	0.908
A5SS	Kifc2:chr15:76660707-76660765:76660707-76660852:76661005-76661087:+	chr15:76660765-76660852	0.038	0.041	0.034	NA	NA	NA	NA	NA	NA	NA	NA	NA	0.202	NA	NA	NA	NA	NA	NA	0.073	NA	0.029	0.147	0.216
A5SS	Sft2d1:chr17:8321799-8321835:8321799-8323335:8326954-8327442:+	chr17:8321835-8323335	NA	NA	NA	NA	NA	NA	NA	NA	NA	NA	NA	NA	NA	NA	NA	NA	NA	NA	NA	0.926	NA	NA	NA	NA
SE	Ptprg:chr14:11962573-11962722:12037340-12037436:12091414-12091481:+	chr14:12037340-12037436	NA	0.99	NA	NA	NA	NA	NA	0.903	NA	NA	NA	NA	NA	NA	0.944	0.843	NA	NA	0.99	NA	NA	0.975	NA	0.988
SE	B3galnt2:chr13:13980600-13980696:13987352-13987463:13990788-13990867:+	chr13:13987352-13987463	NA	NA	NA	NA	NA	NA	NA	NA	NA	NA	NA	NA	NA	NA	0.979	NA	NA	NA	NA	0.983	NA	NA	NA	NA
A3SS	Mapk8:chr14:33387171-33387292:33387171-33387296:33388799-33388982:-	chr14:33387292-33387296	NA	NA	NA	NA	NA	NA	0.99	NA	0.982	NA	NA	NA	NA	NA	0.987	NA	NA	NA	NA	NA	NA	NA	NA	NA
RI	Tubgcp2:chr7:140004798-140004979:140004798-140005450:140005269-140005450:-	chr7:140004979-140005269	0.113	0.045	0.085	0.145	0.148	0.045	0.156	0.117	0.118	0.193	0.102	0.115	0.162	0.124	0.085	0.072	0.048	0.142	0.055	0.115	0.117	0.085	0.082	0.036
SE	Inpp5e:chr2:26399232-26399348:26399412-26399574:26400035-26400143:-	chr2:26399412-26399574	NA	NA	NA	NA	NA	0.961	NA	NA	NA	NA	NA	NA	NA	NA	NA	NA	NA	NA	NA	NA	NA	NA	NA	NA
SE	Naaa:chr5:92272443-92272570:92276918-92277077:92277911-92278165:-	chr5:92276918-92277077	0.933	NA	NA	0.902	0.959	0.946	0.943	NA	NA	0.942	0.888	0.985	NA	NA	NA	NA	NA	0.874	0.664	0.931	0.965	NA	0.941	NA
SE	Sycp2:chr2:178394115-178394258:178394948-178394983:178395220-178395306:-	chr2:178394948-178394983	NA	NA	NA	NA	NA	NA	0.288	NA	NA	NA	NA	NA	NA	NA	NA	NA	NA	NA	NA	NA	NA	NA	NA	NA
SE	Cyp4f13:chr17:32930540-32930662:32941055-32941200:32946788-32947003:-	chr17:32941055-32941200	NA	NA	NA	NA	NA	NA	NA	NA	NA	NA	0.717	NA	NA	NA	NA	NA	NA	NA	NA	NA	NA	NA	NA	NA
RI	Smox:chr2:131520094-131520268:131520094-131521171:131520411-131521171:+	chr2:131520268-131520411	0.089	0.023	0.046	0.219	0.042	NA	0.089	0.075	0.02	0.046	0.062	NA	0.117	0.093	0.072	NA	0.086	0.049	0.059	0.015	0.087	0.055	0.019	0.049
SE	Pip4p2:chr4:14902486-14902539:14912431-14912522:14913723-14915176:+	chr4:14912431-14912522	NA	NA	NA	NA	NA	NA	NA	NA	NA	NA	NA	0.984	NA	NA	NA	NA	NA	NA	NA	NA	NA	NA	NA	NA
SE	Ttbk2:chr2:120822472-120822608:120825241-120825315:120850055-120850390:-	chr2:120825241-120825315	0.793	0.721	0.331	0.358	0.572	0.581	0.485	0.442	0.654	0.601	0.781	0.366	0.542	0.39	0.541	NA	0.508	0.658	0.933	0.429	0.897	0.337	0.514	0.386
SE	Fam160a1:chr3:85676070-85676261:85680940-85681032:85683579-85683659:-	chr3:85680940-85681032	NA	NA	NA	NA	0.011	NA	NA	NA	0.029	NA	NA	NA	0.081	NA	NA	NA	NA	NA	NA	NA	NA	NA	NA	NA
SE	Primpol:chr8:46581437-46581484:46581567-46581650:46586342-46586451:-	chr8:46581567-46581650	NA	NA	NA	NA	NA	NA	NA	NA	NA	NA	0.966	NA	NA	NA	NA	NA	NA	NA	NA	NA	NA	NA	NA	NA
SE	Ipo7:chr7:110040812-110040897:110041980-110042115:110042785-110042885:+	chr7:110041980-110042115	NA	NA	NA	NA	NA	NA	NA	NA	NA	NA	NA	NA	NA	NA	0.992	NA	NA	NA	NA	NA	NA	NA	NA	NA
SE	Lmo7:chr14:101729956-101730225:101794240-101794311:101807453-101807523:+	chr14:101794240-101794311	NA	0.965	NA	NA	NA	NA	NA	NA	NA	NA	NA	NA	NA	NA	NA	NA	NA	NA	NA	NA	0.963	NA	NA	NA
SE	Asph:chr4:9594662-9594698:9595376-9595415:9598268-9598301:-	chr4:9595376-9595415	NA	NA	NA	NA	NA	NA	NA	NA	NA	NA	0.991	NA	NA	NA	NA	NA	NA	NA	NA	NA	NA	NA	0.996	NA
SE	Nbeal1:chr1:60206333-60206416:60217195-60217281:60222066-60222373:+	chr1:60217195-60217281	0.76	0.597	0.835	0.622	0.642	0.858	0.943	0.416	0.899	0.67	0.792	0.908	NA	0.868	0.606	NA	0.425	0.717	0.71	0.747	0.622	0.76	0.927	0.851
SE	Insr:chr8:3159452-3159582:3161338-3161498:3161680-3161791:-	chr8:3161338-3161498	0.984	NA	NA	NA	0.98	NA	NA	NA	NA	NA	NA	NA	NA	0.939	0.956	NA	NA	NA	NA	NA	NA	NA	NA	NA
SE	Ggnbp2:chr11:84854053-84854167:84854254-84854380:84858439-84858538:-	chr11:84854254-84854380	NA	NA	0.014	0.013	0.051	0.073	0.011	0.082	0.056	0.033	0.038	0.008	0.087	0.048	0.02	NA	0.007	0.018	0.023	0.059	0.039	0.006	0.012	NA
SE	Ncoa1:chr12:4247361-4249750:4249835-4249890:4253656-4253746:-	chr12:4249835-4249890	0.53	0.76	0.63	0.824	0.635	0.745	0.594	NA	0.594	0.848	0.473	0.752	0.952	0.646	0.7	NA	0.861	0.354	0.898	0.487	0.53	0.687	0.946	0.674
A3SS	Cuedc2:chr19:46338312-46338411:46338312-46338430:46338519-46338630:-	chr19:46338411-46338430	NA	NA	NA	NA	NA	NA	NA	NA	NA	NA	NA	NA	0.747	NA	NA	NA	NA	NA	NA	NA	NA	NA	NA	NA
SE	Rab6b:chr9:103111806-103112226:103140381-103140440:103160819-103160873:+	chr9:103140381-103140440	NA	NA	NA	0.972	0.976	NA	0.923	NA	NA	NA	NA	NA	NA	NA	NA	NA	NA	NA	NA	NA	NA	NA	NA	NA
SE	Ttc27:chr17:74739597-74739762:74742917-74743051:74747651-74747764:+	chr17:74742917-74743051	NA	NA	0.958	NA	NA	NA	NA	NA	NA	NA	NA	NA	NA	NA	NA	NA	NA	NA	NA	NA	NA	NA	NA	NA
SE	Calr:chr8:84844870-84844965:84845861-84846065:84846249-84846351:-	chr8:84845861-84846065	0.997	1	0.999	0.999	0.995	0.999	0.998	0.997	0.999	0.997	0.992	0.993	NA	0.999	0.998	NA	0.999	0.997	1	0.997	0.995	NA	0.996	0.999
SE	Rian:chr12:109606213-109606341:109617173-109617349:109620312-109620400:+	chr12:109617173-109617349	NA	0.598	NA	NA	NA	0.956	NA	NA	NA	NA	NA	0.947	0.932	0.702	NA	NA	NA	NA	NA	NA	0.828	0.749	0.775	NA
SE	Cdkl3:chr11:52033513-52033611:52040560-52040620:52084370-52084490:+	chr11:52040560-52040620	NA	0.681	NA	NA	NA	NA	NA	NA	0.234	NA	NA	NA	NA	0.416	NA	0.382	0.416	NA	NA	NA	NA	0.74	0.588	NA
RI	Rab3gap2:chr1:185266900-185267074:185266900-185267279:185267172-185267279:+	chr1:185267074-185267172	0.089	0.089	0.054	0.177	0.376	0.256	0.147	0.044	0.173	0.167	0.302	0.072	0.251	0.167	0.105	0.077	0.099	0.1	0.128	0.241	0.04	0.078	0.108	0.126
A3SS	Retreg2:chr1:75144391-75144439:75144303-75144439:75143922-75143953:+	chr1:75144303-75144391	0.977	0.954	0.907	0.988	NA	0.983	0.964	0.949	NA	0.973	NA	0.969	0.99	0.927	NA	NA	NA	0.977	0.895	0.95	0.97	0.986	0.951	0.993
SE	Rnf13:chr3:57807021-57807127:57820506-57820600:57832963-57833044:+	chr3:57820506-57820600	NA	0.986	NA	NA	NA	NA	NA	0.991	NA	NA	NA	NA	NA	NA	NA	NA	NA	NA	0.994	NA	NA	NA	NA	NA
RI	Gm15834:chr1:58510570-58510644:58510570-58512266:58512138-58512266:+	chr1:58510644-58512138	NA	NA	NA	NA	NA	0.499	0.07	NA	NA	NA	NA	NA	NA	NA	NA	NA	NA	NA	NA	NA	NA	NA	NA	NA
SE	Zdhhc21:chr4:82807012-82807056:82820329-82820446:82835445-82835584:-	chr4:82820329-82820446	NA	NA	NA	NA	NA	0.972	0.874	NA	NA	NA	NA	NA	NA	0.951	NA	NA	0.975	NA	NA	NA	NA	NA	0.938	NA
SE	Hdac5:chr11:102219144-102219281:102221767-102221851:102224733-102224955:-	chr11:102221767-102221851	NA	NA	NA	NA	NA	NA	NA	NA	0.39	NA	NA	0.176	NA	NA	NA	NA	0.242	NA	NA	NA	NA	NA	NA	NA
SE	Cox6b1:chr7:30616860-30617162:30623414-30623515:30624499-30624613:-	chr7:30623414-30623515	0.993	0.993	0.994	0.993	0.996	0.989	0.998	0.998	0.991	0.993	0.998	0.99	0.987	0.987	0.996	0.985	0.993	0.99	0.995	0.992	0.996	0.998	0.995	0.992
SE	Mkrn2:chr6:115610518-115610700:115611634-115611939:115613326-115613541:+	chr6:115611634-115611939	0.941	0.927	0.951	NA	0.948	NA	0.967	0.953	0.925	NA	0.949	0.976	NA	0.931	0.964	0.798	0.95	NA	0.914	NA	NA	0.96	0.896	NA
SE	Gm2115:chr7:84529137-84529189:84566462-84566747:84575704-84575841:+	chr7:84566462-84566747	0.066	0.106	0.1	0.123	0.028	0.09	0.093	0.042	0.187	0.047	0.041	0.045	0.155	0.088	0.182	0.172	0.045	0.045	0.27	0.143	0.026	0.108	0.127	0.129
A3SS	Atpaf2:chr11:60405775-60405856:60405775-60405877:60407293-60407391:-	chr11:60405856-60405877	0.219	0.21	0.207	0.214	0.232	0.244	0.154	0.296	0.239	0.252	0.202	0.166	0.295	0.197	0.209	NA	0.268	0.256	0.062	0.202	0.139	0.216	0.345	0.203
RI	Nsun5:chr5:135375274-135375485:135375274-135375698:135375554-135375698:+	chr5:135375485-135375554	0.313	0.225	0.333	0.335	0.307	0.275	0.306	0.146	0.455	0.372	0.39	0.461	0.543	0.419	0.238	0.451	0.382	0.389	0.522	0.219	0.19	0.092	0.291	0.369
SE	Armh3:chr19:45892065-45892148:45921616-45921705:45932350-45932411:-	chr19:45921616-45921705	0.936	NA	NA	NA	NA	NA	NA	NA	NA	NA	NA	NA	NA	NA	NA	NA	NA	NA	NA	NA	NA	NA	NA	NA
SE	Rpl36:chr17:56613415-56613448:56613585-56613680:56613906-56614041:+	chr17:56613585-56613680	NA	NA	NA	NA	NA	1	NA	NA	NA	NA	NA	NA	NA	NA	NA	NA	1	NA	NA	1	NA	NA	NA	NA
SE	Lcmt1:chr7:123404422-123404484:123410723-123410826:123418217-123418338:+	chr7:123410723-123410826	NA	0.984	NA	NA	NA	NA	NA	NA	NA	NA	NA	NA	NA	NA	NA	NA	NA	NA	NA	NA	NA	NA	NA	NA
A5SS	Mlf2:chr6:124932098-124932176:124932098-124932221:124932410-124932537:+	chr6:124932176-124932221	0.016	0.019	0.025	0.018	0.013	0.011	0.017	0.03	0.011	0.027	0.049	0.036	0.048	0.013	0.012	0.127	0.02	0.038	0.024	0.013	0.029	0.016	0.015	0.022
SE	Clpb:chr7:101706482-101706586:101722704-101722833:101751233-101751322:+	chr7:101722704-101722833	NA	NA	NA	NA	NA	NA	NA	NA	NA	NA	0.992	NA	NA	NA	NA	NA	NA	NA	NA	NA	NA	NA	NA	NA
SE	Ampd3:chr7:110804824-110804988:110805963-110806084:110807779-110807953:+	chr7:110805963-110806084	NA	0.989	0.996	NA	NA	NA	NA	NA	NA	NA	NA	NA	NA	NA	0.996	NA	0.994	NA	NA	NA	NA	0.995	NA	0.982
SE	Gnas:chr2:174327767-174327941:174328107-174330434:174334211-174334284:+	chr2:174328107-174330434	0.943	0.943	0.957	0.923	0.992	0.964	0.971	0.98	0.966	0.98	0.926	0.99	0.942	0.962	0.924	NA	0.971	0.99	0.937	0.914	0.969	0.94	0.986	0.936
SE	Flna:chrX:74227490-74227757:74228085-74228238:74228320-74228489:-	chrX:74228085-74228238	NA	NA	NA	NA	NA	NA	NA	NA	NA	NA	NA	NA	NA	NA	NA	NA	0.994	NA	NA	NA	NA	NA	NA	NA
RI	Nrcam:chr12:44544724-44544895:44544724-44546824:44545378-44546824:+	chr12:44544895-44545378	NA	0.014	0.024	NA	NA	NA	NA	NA	0.136	NA	NA	NA	NA	NA	0.029	NA	NA	NA	NA	NA	NA	0.047	NA	0.048
SE	Hook3:chr8:26044239-26044274:26048251-26048339:26059239-26059380:-	chr8:26048251-26048339	NA	NA	NA	NA	NA	NA	NA	NA	NA	NA	NA	NA	NA	NA	NA	NA	0.983	NA	NA	NA	NA	NA	NA	NA
A3SS	Cops2:chr2:125842621-125842711:125842621-125842732:125844809-125844935:-	chr2:125842711-125842732	0.347	0.345	0.439	0.442	0.518	0.328	0.319	0.343	0.445	0.464	0.352	0.42	0.379	0.379	0.361	0.36	0.417	0.401	0.424	0.387	0.425	0.367	0.437	0.315
SE	Abi3bp:chr16:56594461-56594536:56611042-56611084:56642488-56642560:+	chr16:56611042-56611084	0.187	NA	NA	0.409	NA	0.404	NA	0.593	NA	NA	NA	NA	NA	0.26	NA	NA	NA	0.689	NA	NA	NA	NA	0.454	NA
SE	Scnm1:chr3:95129535-95129883:95130163-95130358:95132824-95132913:-	chr3:95130163-95130358	0.932	0.936	0.935	0.914	0.927	0.987	0.901	0.99	0.91	0.909	0.943	0.98	NA	0.989	0.922	0.8	0.925	0.929	0.899	0.899	0.876	0.852	0.964	0.875
SE	Ccna2:chr3:36568979-36569089:36570075-36570165:36570735-36570979:-	chr3:36570075-36570165	NA	NA	NA	NA	NA	0.01	0.061	NA	NA	NA	NA	NA	NA	NA	NA	NA	NA	NA	NA	NA	0.034	NA	NA	NA
SE	Son:chr16:91671348-91671465:91673984-91674022:91674694-91674774:+	chr16:91673984-91674022	NA	NA	NA	0.399	NA	0.05	NA	NA	NA	NA	NA	NA	NA	NA	NA	NA	0.054	NA	NA	NA	NA	NA	NA	NA
SE	Pkn2:chr3:142811913-142812057:142820536-142820646:142821518-142821704:-	chr3:142820536-142820646	NA	NA	NA	NA	NA	NA	0.985	NA	NA	NA	NA	NA	NA	NA	NA	NA	NA	NA	NA	NA	NA	NA	NA	NA
SE	Add1:chr5:34573768-34573913:34598269-34598447:34601323-34601538:+	chr5:34598269-34598447	0.057	0.03	0.037	0.087	0.088	0.058	0.07	0.081	0.077	0.084	0.097	0.147	0.136	0.044	0.035	0.11	0.042	0.073	0.034	0.078	0.077	0.021	0.094	0.028
A3SS	Cep57:chr9:13813409-13813514:13813409-13813520:13816054-13816132:-	chr9:13813514-13813520	NA	NA	NA	NA	NA	NA	NA	0.914	NA	NA	NA	NA	NA	NA	NA	NA	NA	NA	NA	NA	NA	0.973	NA	NA
SE	Map4k4:chr1:39997020-39997182:40000530-40000749:40003762-40003987:+	chr1:40000530-40000749	NA	NA	NA	NA	NA	0.949	NA	NA	NA	NA	NA	NA	NA	NA	NA	NA	NA	NA	NA	NA	NA	NA	NA	NA
SE	Tecpr1:chr5:144198583-144199309:144199729-144199786:144200814-144200894:-	chr5:144199729-144199786	NA	NA	NA	NA	NA	NA	NA	NA	NA	0.935	NA	NA	NA	NA	NA	NA	NA	NA	NA	NA	NA	NA	NA	NA
SE	Pde4b:chr4:102597693-102597858:102599642-102599742:102601532-102601687:+	chr4:102599642-102599742	NA	0.992	0.991	NA	NA	NA	NA	NA	NA	NA	NA	NA	NA	NA	NA	NA	NA	NA	NA	NA	NA	0.983	NA	NA
SE	Psenen:chr7:30561862-30562134:30562323-30562428:30562795-30562938:-	chr7:30562323-30562428	NA	NA	NA	NA	NA	NA	NA	NA	NA	NA	NA	NA	0.993	NA	0.998	NA	NA	NA	NA	NA	NA	NA	NA	NA
SE	Rgl1:chr1:152557402-152557587:152571597-152571675:152586406-152586615:-	chr1:152571597-152571675	NA	NA	NA	NA	NA	NA	NA	NA	NA	0.993	0.97	NA	0.995	NA	0.985	NA	0.985	0.978	NA	NA	NA	NA	0.986	0.972
SE	Gyg:chr3:20122146-20122864:20123121-20123172:20125257-20125477:-	chr3:20123121-20123172	0.005	0.009	0.012	0.02	0.004	0.007	NA	0.005	0.027	NA	NA	NA	0.007	NA	0.018	0.087	0.032	0.004	0.037	0.013	0.003	0.009	0.008	NA
SE	Repin1:chr6:48593899-48594052:48594861-48594976:48596292-48599081:+	chr6:48594861-48594976	0.721	0.927	0.79	0.717	0.865	0.554	0.756	0.871	0.91	NA	0.738	0.871	NA	NA	0.685	NA	0.965	0.685	0.738	0.936	0.815	0.594	0.316	0.784
SE	Atad3a:chr4:155749156-155749208:155750131-155750256:155750472-155750598:-	chr4:155750131-155750256	0.994	NA	NA	NA	NA	NA	NA	NA	NA	NA	NA	NA	NA	NA	NA	NA	NA	NA	0.95	NA	NA	NA	NA	NA
SE	Ap4b1:chr3:103817759-103817843:103818803-103818907:103820253-103820461:+	chr3:103818803-103818907	0.966	0.98	0.96	NA	NA	0.943	0.981	NA	NA	0.89	NA	NA	0.911	NA	NA	NA	NA	NA	NA	NA	NA	0.977	NA	NA
SE	Srgap3:chr6:112717970-112723201:112727212-112727540:112729648-112729798:-	chr6:112727212-112727540	0.155	0.304	0.277	0.41	0.424	0.298	0.275	0.349	0.301	0.374	0.356	0.309	0.221	0.245	0.363	NA	0.224	0.379	0.397	0.365	0.304	0.308	0.465	0.238
SE	Slc22a17:chr14:54907518-54907630:54907831-54908103:54908260-54908366:-	chr14:54907831-54908103	0.941	0.981	NA	0.857	0.931	0.954	0.95	0.816	0.934	NA	0.904	0.913	0.855	0.783	0.91	NA	NA	NA	0.695	0.827	NA	NA	0.759	NA
SE	Aldh9a1:chr1:167354426-167354556:167355671-167355806:167356529-167356726:+	chr1:167355671-167355806	0.994	NA	NA	NA	0.993	NA	0.994	NA	NA	NA	0.98	NA	NA	0.984	NA	NA	NA	NA	0.949	0.99	NA	0.977	NA	NA
A3SS	Kdm5d:chrY:927709-927891:927602-927891:927244-927439:+	chrY:927602-927709	0.107	0.496	0.22	0.238	0.229	0.275	0.242	0.245	0.46	0.179	0.314	0.144	0.234	0.057	0.107	NA	0.18	0.194	0.248	0.34	0.297	0.082	0.333	0.202
SE	Rtel1:chr2:181352752-181352848:181354075-181354175:181354352-181354442:+	chr2:181354075-181354175	0.843	NA	NA	0.599	NA	NA	NA	NA	0.886	0.827	NA	NA	NA	NA	NA	NA	NA	0.77	NA	NA	0.473	NA	NA	0.705
SE	Miga1:chr3:152320609-152320743:152333480-152333617:152335251-152335429:-	chr3:152333480-152333617	NA	NA	0.934	NA	NA	NA	0.851	NA	NA	NA	NA	NA	NA	NA	NA	NA	NA	NA	NA	0.758	NA	NA	NA	NA
SE	Dennd4b:chr3:90270054-90270121:90270212-90270271:90270446-90270591:+	chr3:90270212-90270271	NA	NA	NA	NA	NA	NA	NA	NA	NA	NA	NA	NA	NA	0.811	NA	NA	NA	NA	NA	NA	NA	NA	NA	NA
SE	2310010J17Rik:chr7:90124821-90125032:90126927-90127044:90129871-90129984:-	chr7:90126927-90127044	NA	NA	NA	NA	0.047	NA	0.085	NA	NA	NA	NA	0.395	0.464	NA	0.123	NA	NA	0.062	NA	0.041	0.056	NA	0.207	0.085
SE	Col3a1:chr1:45343393-45343501:45343965-45344019:45344458-45344566:+	chr1:45343965-45344019	NA	NA	NA	NA	NA	1	NA	NA	NA	NA	NA	NA	NA	NA	NA	NA	NA	NA	NA	NA	NA	NA	NA	NA
SE	Mdh2:chr5:135778661-135778801:135784183-135784267:135785928-135786038:+	chr5:135784183-135784267	NA	NA	NA	NA	NA	NA	0.997	NA	NA	NA	NA	NA	NA	NA	NA	NA	NA	NA	NA	NA	NA	NA	NA	NA
SE	Rapgefl1:chr11:98850093-98850181:98850364-98850429:98850784-98850839:+	chr11:98850364-98850429	NA	NA	NA	0.511	NA	NA	NA	NA	NA	NA	NA	NA	NA	NA	NA	NA	NA	NA	NA	NA	NA	0.635	NA	NA
SE	Spns1:chr7:126373921-126374073:126374200-126374279:126375066-126375203:-	chr7:126374200-126374279	NA	NA	NA	NA	NA	NA	NA	NA	NA	NA	0.065	NA	NA	0.011	NA	NA	NA	NA	NA	NA	NA	NA	NA	NA
RI	Rnaseh2a:chr8:84957666-84957853:84957666-84958089:84957965-84958089:-	chr8:84957853-84957965	0.557	0.708	0.907	NA	NA	0.895	0.82	0.758	0.82	NA	NA	NA	NA	NA	0.72	NA	NA	0.901	NA	NA	NA	0.604	NA	NA
SE	G3bp1:chr11:55487478-55487560:55489018-55489192:55491963-55492054:+	chr11:55489018-55489192	NA	NA	NA	NA	0.997	NA	NA	NA	NA	NA	NA	NA	NA	0.992	NA	NA	NA	0.993	NA	NA	NA	NA	NA	NA
SE	Nup85:chr11:115580503-115580587:115580729-115580795:115580920-115581072:+	chr11:115580729-115580795	NA	NA	NA	NA	NA	0.988	NA	NA	NA	NA	NA	NA	NA	NA	NA	NA	NA	NA	NA	NA	NA	NA	NA	NA
SE	Dennd5a:chr7:109905169-109905298:109905695-109905780:109908330-109908415:-	chr7:109905695-109905780	NA	NA	NA	NA	NA	NA	NA	NA	NA	NA	NA	NA	NA	0.99	NA	NA	NA	NA	NA	NA	NA	NA	NA	NA
SE	Ndufaf3:chr9:108566158-108566259:108566340-108566407:108566555-108566751:-	chr9:108566340-108566407	0.959	0.992	NA	NA	NA	NA	NA	0.97	0.985	0.97	NA	NA	NA	NA	NA	NA	NA	NA	NA	NA	0.991	NA	NA	NA
SE	Adal:chr2:121143148-121143222:121146032-121146120:121148240-121148322:+	chr2:121146032-121146120	NA	NA	NA	NA	NA	NA	NA	NA	NA	NA	NA	NA	NA	NA	NA	NA	NA	NA	NA	NA	NA	NA	0.891	NA
RI	Faah:chr4:115999498-115999607:115999498-116000088:116000048-116000088:-	chr4:115999607-116000048	0.135	NA	NA	0.016	0.107	0.023	0.018	0.066	0.083	0.065	0.099	0.071	0.068	0.068	NA	NA	NA	0.071	NA	NA	0.112	NA	0.121	NA
SE	Sap30bp:chr11:115951966-115952009:115957360-115957449:115960499-115960591:+	chr11:115957360-115957449	0.992	NA	NA	0.948	NA	0.993	0.982	NA	0.966	0.991	0.992	NA	NA	0.973	0.954	NA	0.993	NA	0.993	0.989	NA	NA	0.991	NA
RI	Adck5:chr15:76594152-76594284:76594152-76594447:76594363-76594447:+	chr15:76594284-76594363	0.299	0.184	0.246	0.216	0.122	0.433	0.357	0.133	0.219	0.059	0.374	0.329	0.125	0.28	0.199	NA	0.215	0.276	NA	0.269	0.124	0.219	0.342	0.088
SE	Setd3:chr12:108113318-108113393:108119105-108119164:108157753-108158010:-	chr12:108119105-108119164	NA	NA	NA	NA	NA	NA	NA	NA	NA	NA	NA	0.917	NA	NA	NA	NA	NA	NA	NA	NA	NA	0.845	NA	NA
SE	Rps2:chr17:24720533-24720731:24720968-24721302:24721622-24721714:+	chr17:24720968-24721302	NA	NA	NA	NA	NA	NA	NA	NA	NA	1	NA	NA	1	NA	1	0.998	1	NA	NA	1	NA	1	NA	NA
SE	Atxn2l:chr7:126491785-126492215:126492443-126492608:126492757-126493001:-	chr7:126492443-126492608	0.869	NA	0.922	NA	NA	NA	NA	NA	NA	NA	NA	NA	NA	NA	0.884	NA	NA	NA	NA	NA	NA	NA	NA	NA
SE	Nmrk2:chr10:81200531-81200580:81200890-81200981:81201950-81202051:-	chr10:81200890-81200981	NA	NA	NA	NA	NA	NA	NA	NA	NA	NA	NA	NA	NA	NA	0.882	NA	NA	NA	NA	NA	NA	NA	NA	NA
SE	Slc2a8:chr2:32974837-32976280:32981360-32981883:32981957-32982068:-	chr2:32981360-32981883	NA	NA	NA	NA	NA	NA	NA	NA	NA	NA	NA	NA	NA	NA	NA	NA	NA	NA	NA	NA	NA	NA	0.59	NA
SE	Zfhx2:chr14:55060261-55063571:55063804-55067281:55067484-55067611:-	chr14:55063804-55067281	NA	0.955	NA	NA	NA	NA	NA	NA	NA	NA	NA	NA	NA	NA	NA	NA	NA	NA	NA	NA	NA	NA	NA	NA
SE	Lamb1:chr12:31306974-31307189:31307949-31308046:31318263-31318633:+	chr12:31307949-31308046	NA	NA	NA	NA	NA	NA	NA	NA	NA	NA	NA	NA	NA	NA	NA	NA	NA	NA	NA	NA	0.997	NA	NA	NA
SE	Ppp1r12b:chr1:134893349-134893509:134896342-134896461:134902377-134902508:-	chr1:134896342-134896461	NA	NA	NA	NA	NA	NA	NA	NA	NA	NA	NA	NA	NA	NA	NA	NA	NA	NA	NA	NA	NA	NA	NA	0.859
A3SS	Pqlc3:chr12:16997633-16997656:16997633-16997703:16997773-16997856:-	chr12:16997656-16997703	NA	NA	NA	NA	NA	NA	0.986	NA	NA	NA	NA	NA	NA	0.971	NA	NA	NA	NA	NA	0.945	NA	0.977	NA	NA
SE	Mtrf1l:chr10:5817448-5817612:5818800-5818984:5820024-5820104:-	chr10:5818800-5818984	NA	NA	NA	NA	NA	NA	NA	NA	NA	NA	NA	NA	NA	NA	NA	NA	NA	NA	NA	0.968	NA	NA	NA	NA
SE	Cpsf1:chr15:76601105-76601186:76601262-76601337:76601403-76601498:-	chr15:76601262-76601337	NA	NA	NA	NA	NA	NA	NA	NA	NA	NA	NA	NA	0.975	NA	NA	NA	NA	NA	NA	NA	NA	NA	NA	NA
SE	Ptprd:chr4:76091421-76091539:76095519-76095546:76099411-76099605:-	chr4:76095519-76095546	NA	NA	0.958	NA	NA	NA	NA	NA	0.938	NA	NA	NA	NA	NA	NA	NA	NA	NA	0.974	0.733	NA	NA	NA	NA
SE	Krit1:chr5:3809635-3809728:3811255-3811385:3812331-3812575:+	chr5:3811255-3811385	NA	NA	NA	NA	NA	NA	NA	0.977	NA	NA	NA	NA	NA	NA	NA	NA	NA	NA	NA	NA	NA	NA	NA	NA
SE	Ccdc58:chr16:36085016-36085163:36089900-36089960:36091833-36091959:+	chr16:36089900-36089960	NA	NA	NA	NA	NA	NA	NA	NA	NA	NA	NA	NA	NA	NA	0.951	NA	NA	NA	NA	NA	NA	NA	0.99	NA
SE	Hdac2:chr10:36993775-36993884:36996988-36997129:36997393-36997502:+	chr10:36996988-36997129	NA	NA	NA	NA	NA	NA	NA	NA	NA	NA	NA	NA	0.994	NA	NA	NA	NA	NA	NA	NA	NA	NA	NA	NA
SE	Ceacam1:chr7:25471797-25472073:25474519-25474804:25476343-25476703:-	chr7:25474519-25474804	0.462	NA	NA	0.632	NA	NA	NA	NA	NA	NA	NA	NA	NA	NA	NA	NA	NA	NA	0.546	NA	0.407	0.171	NA	0.34
A3SS	Tyms:chr5:30068465-30068538:30068465-30068640:30071633-30071707:-	chr5:30068538-30068640	0.985	NA	NA	NA	NA	0.89	NA	NA	NA	0.937	NA	NA	NA	NA	NA	NA	NA	0.964	NA	NA	NA	NA	0.973	NA
SE	Fbxl2:chr9:114003441-114003496:114004036-114004194:114017988-114018050:-	chr9:114004036-114004194	0.075	NA	NA	NA	0.014	0.106	NA	0.072	NA	0.222	0.15	0.041	0.133	0.235	0.097	NA	NA	0.085	NA	0.16	NA	NA	0.171	NA
SE	Fopnl:chr16:14299243-14300209:14304453-14304564:14311046-14311131:-	chr16:14304453-14304564	NA	NA	NA	0.986	0.987	NA	NA	NA	NA	0.99	0.98	0.989	0.96	NA	NA	NA	NA	0.973	NA	0.985	NA	NA	NA	NA
SE	Zfp827:chr8:79178889-79179079:79180044-79180211:79185597-79185789:+	chr8:79180044-79180211	NA	0.86	NA	NA	NA	NA	NA	NA	NA	NA	NA	0.883	NA	NA	NA	NA	NA	NA	NA	NA	NA	NA	NA	NA
SE	Pole2:chr12:69202906-69202974:69204139-69204267:69206409-69206518:-	chr12:69204139-69204267	0.811	NA	NA	NA	NA	NA	0.729	0.925	NA	NA	NA	NA	NA	NA	NA	NA	NA	NA	NA	NA	NA	NA	NA	NA
SE	Col1a2:chr6:4530956-4531010:4531103-4531157:4531237-4531345:+	chr6:4531103-4531157	NA	NA	NA	NA	NA	NA	NA	NA	NA	NA	NA	NA	NA	NA	NA	NA	NA	1	NA	NA	NA	NA	NA	NA
SE	Chmp3:chr6:71552398-71552459:71560896-71561076:71574114-71574127:+	chr6:71560896-71561076	0.971	0.95	0.957	0.978	0.983	0.982	0.985	0.976	0.942	0.984	0.992	0.979	0.965	0.964	0.977	NA	0.973	0.989	0.98	0.97	0.986	0.928	0.963	0.978
A3SS	Myo18b:chr5:112871420-112871597:112871420-112871638:112872383-112872496:-	chr5:112871597-112871638	NA	NA	NA	NA	NA	NA	NA	NA	NA	NA	NA	NA	NA	NA	0.207	NA	NA	NA	NA	NA	NA	NA	NA	NA
SE	Med7:chr11:46439805-46439824:46439926-46439975:46440562-46440764:+	chr11:46439926-46439975	NA	0.927	NA	NA	NA	NA	NA	NA	NA	NA	NA	0.94	NA	NA	NA	NA	NA	NA	NA	NA	0.758	0.921	0.871	NA
SE	Ralgapa1:chr12:55719583-55719708:55722773-55722941:55738210-55738372:-	chr12:55722773-55722941	NA	NA	0.955	NA	NA	NA	NA	NA	NA	NA	NA	NA	NA	NA	NA	NA	NA	NA	NA	NA	NA	NA	NA	NA
SE	Ikzf5:chr7:131396740-131396851:131408930-131409078:131410386-131410405:-	chr7:131408930-131409078	0.111	0.201	NA	NA	0.075	NA	0.096	NA	0.104	NA	0.147	0.044	NA	NA	NA	NA	NA	0.106	NA	NA	NA	NA	NA	NA
SE	Slc22a17:chr14:54908501-54908647:54908822-54908863:54909670-54909825:-	chr14:54908822-54908863	0.093	0.343	0.388	0.273	0.136	0.32	0.123	0.108	0.198	0.567	0.333	0.258	0.227	0.495	0.282	NA	0.282	0.219	0.767	0.17	0.034	0.282	0.362	0.576
SE	Zfp995:chr17:21881957-21882084:21887310-21887358:21908048-21908092:-	chr17:21887310-21887358	NA	NA	0.841	NA	NA	NA	NA	NA	NA	NA	NA	NA	NA	NA	NA	NA	NA	NA	NA	NA	NA	NA	NA	NA
SE	Tle2:chr10:81580256-81580667:81580894-81580914:81581644-81581755:+	chr10:81580894-81580914	NA	0.92	NA	0.98	0.905	0.931	0.958	0.944	0.921	0.881	0.964	0.963	0.957	0.939	NA	NA	NA	0.978	NA	NA	0.959	NA	0.969	NA
SE	2700099C18Rik:chr17:94756433-94756523:94761497-94761604:94762461-94762620:+	chr17:94761497-94761604	0.368	NA	NA	0.225	NA	0.636	0.636	0.744	NA	NA	0.368	NA	NA	NA	NA	NA	0.636	NA	NA	NA	NA	NA	NA	NA
SE	R3hdm2:chr10:127464981-127465013:127465130-127465184:127471767-127472000:+	chr10:127465130-127465184	0.026	0.035	0.062	0.137	NA	0.006	0.006	0.006	0.061	0.025	0.072	0.04	0.087	0.019	0.034	0.106	NA	0.043	0.007	0.095	0.035	0.013	0.005	0.017
SE	Isca2:chr12:84773306-84773677:84773792-84773908:84774542-84774804:+	chr12:84773792-84773908	0.599	0.686	0.551	0.614	0.63	0.418	0.521	0.569	0.509	0.7	0.638	0.552	0.692	0.536	0.512	0.58	0.567	0.607	0.751	0.603	0.506	0.452	0.518	0.521
SE	Pyroxd2:chr19:42725857-42726989:42727656-42727777:42729621-42729728:-	chr19:42727656-42727777	NA	NA	NA	NA	NA	NA	0.927	NA	NA	NA	NA	NA	NA	NA	NA	NA	NA	NA	NA	NA	NA	NA	NA	NA
RI	Rit1:chr3:88717325-88717470:88717325-88717658:88717601-88717658:+	chr3:88717470-88717601	0.056	0.088	0.046	0.098	0.061	0.083	0.074	0.023	0.029	0.03	0.011	0.054	0.058	0.095	0.117	0.459	0.076	0.05	0.071	0.081	0.076	0.057	0.028	0.074
SE	Axl:chr7:25770632-25770765:25773098-25773125:25774514-25774725:-	chr7:25773098-25773125	0.766	0.759	0.751	0.446	0.651	0.752	0.897	0.732	0.248	0.703	0.473	0.756	0.681	0.657	0.835	NA	0.819	0.696	0.733	0.377	0.478	0.758	0.694	0.83
SE	Scp2:chr4:108043838-108044845:108047589-108047669:108063885-108063988:-	chr4:108047589-108047669	NA	NA	NA	NA	NA	NA	NA	NA	NA	NA	NA	NA	NA	NA	NA	NA	NA	NA	NA	0.998	NA	NA	NA	NA
RI	Nabp1:chr1:51477477-51477616:51477477-51478399:51477721-51478399:-	chr1:51477616-51477721	NA	0.916	NA	NA	NA	NA	NA	NA	NA	NA	NA	0.848	NA	NA	NA	NA	NA	NA	NA	NA	NA	NA	NA	NA
SE	Dnajb6:chr5:29766324-29766395:29781129-29781450:29785030-29786478:+	chr5:29781129-29781450	0.963	0.992	NA	0.992	0.961	0.982	NA	0.981	NA	NA	0.988	0.991	NA	NA	0.944	NA	NA	NA	0.892	0.99	0.989	0.991	0.972	0.98
SE	Atp5md:chr19:47083485-47083569:47084768-47084858:47085954-47086047:-	chr19:47084768-47084858	0	0.003	0.002	0.003	0.001	NA	0	0.002	0.002	0.001	0.002	NA	NA	0.001	0.002	0.001	0.001	NA	NA	0.001	0.002	0.001	0.001	0.003
SE	Fam120b:chr17:15396201-15396560:15401744-15403129:15405754-15405935:+	chr17:15401744-15403129	NA	NA	0.988	NA	NA	0.988	NA	NA	NA	NA	NA	NA	NA	NA	NA	NA	NA	NA	NA	NA	NA	NA	NA	NA
SE	Myh10:chr11:68745316-68745419:68745934-68745964:68751941-68752034:+	chr11:68745934-68745964	NA	NA	NA	0.005	NA	NA	NA	NA	0.002	NA	NA	NA	NA	NA	NA	NA	NA	NA	NA	NA	NA	NA	NA	NA
SE	Mtch1:chr17:29333513-29333589:29333774-29333842:29333957-29334005:-	chr17:29333774-29333842	0.998	NA	NA	NA	NA	NA	NA	NA	NA	NA	NA	NA	NA	NA	NA	NA	NA	NA	NA	0.998	0.998	NA	NA	NA
SE	Lrrfip1:chr1:91068562-91068649:91078390-91078435:91079030-91079081:+	chr1:91078390-91078435	NA	NA	NA	NA	NA	NA	NA	NA	NA	NA	NA	NA	NA	NA	0.776	NA	NA	NA	NA	NA	NA	NA	NA	0.697
SE	Dolpp1:chr2:30392415-30392512:30393646-30393853:30395658-30395759:+	chr2:30393646-30393853	0.01	NA	NA	0.042	NA	0.088	0.023	NA	NA	NA	0.067	NA	0.095	0.029	NA	NA	NA	NA	NA	0.102	NA	NA	0.016	0.112
SE	Fer:chr17:63981479-63981686:63991593-63991716:64029289-64029346:+	chr17:63991593-63991716	NA	0.907	0.982	NA	NA	NA	0.969	NA	0.972	NA	NA	NA	NA	NA	NA	NA	NA	NA	NA	0.985	NA	0.982	NA	NA
SE	Ifnar2:chr16:91384982-91385024:91385941-91386065:91387943-91388116:+	chr16:91385941-91386065	0.975	0.984	0.993	0.977	0.992	0.983	NA	0.981	0.977	0.997	0.993	0.978	0.98	NA	0.994	NA	0.985	0.991	0.974	NA	0.982	0.949	0.981	0.991
A5SS	Pdlim7:chr13:55507329-55507366:55506305-55507366:55505933-55506168:-	chr13:55506305-55507329	0.92	0.886	0.976	0.985	NA	0.975	0.939	NA	NA	0.973	0.932	0.944	NA	NA	0.989	NA	0.977	NA	NA	0.953	NA	NA	0.91	0.975
SE	Hspg2:chr4:137533431-137533559:137533664-137533751:137535123-137535182:+	chr4:137533664-137533751	NA	NA	NA	NA	0.993	NA	NA	NA	NA	NA	NA	0.997	NA	NA	NA	NA	0.998	NA	NA	NA	NA	NA	NA	NA
A3SS	Pkdcc:chr17:83221052-83221237:83220965-83221237:83220101-83220156:+	chr17:83220965-83221052	NA	0.965	NA	NA	0.947	0.961	0.988	NA	NA	NA	0.929	NA	NA	NA	0.979	NA	0.991	0.971	NA	NA	NA	0.979	NA	0.994
SE	Zfyve1:chr12:83552375-83552546:83554942-83555060:83555164-83555262:-	chr12:83554942-83555060	NA	NA	0.989	NA	NA	NA	NA	NA	NA	NA	NA	NA	NA	NA	NA	NA	NA	NA	NA	NA	NA	NA	NA	NA
SE	Lars:chr18:42250828-42250909:42251292-42251380:42257069-42257194:-	chr18:42251292-42251380	NA	NA	NA	0.977	NA	NA	NA	NA	NA	NA	NA	NA	NA	NA	NA	NA	NA	NA	NA	NA	0.981	NA	NA	NA
SE	Ints10:chr8:68822156-68822250:68825051-68825129:68827276-68827501:+	chr8:68825051-68825129	NA	0.102	NA	0.013	NA	0.024	0.03	NA	0.014	0.023	0.016	NA	NA	0.015	0.035	NA	0.028	0.039	NA	0.047	0.022	NA	NA	NA
SE	1700037H04Rik:chr2:131148155-131148294:131149440-131149542:131151617-131151756:-	chr2:131149440-131149542	0.027	0.012	NA	NA	0.024	0.012	0.007	NA	0.014	0.013	NA	0.019	0.008	NA	0.008	NA	0.038	0.024	NA	NA	0.008	NA	0.009	NA
SE	1700001L05Rik:chr15:83358822-83358950:83365028-83365513:83366989-83367282:-	chr15:83365028-83365513	NA	NA	NA	0.604	NA	NA	NA	NA	NA	NA	NA	NA	NA	NA	0.653	NA	NA	0.281	NA	0.702	0.902	NA	0.54	NA
SE	Zmiz2:chr11:6401097-6401255:6402406-6402474:6402803-6402872:+	chr11:6402406-6402474	NA	0.982	NA	NA	NA	NA	NA	NA	NA	NA	NA	NA	NA	NA	NA	NA	NA	NA	0.956	NA	NA	NA	NA	NA
A5SS	Blvrb:chr7:27459255-27459420:27459255-27459633:27462566-27462695:+	chr7:27459420-27459633	NA	NA	NA	NA	NA	NA	NA	NA	NA	NA	0.861	NA	NA	NA	NA	NA	0.92	NA	NA	NA	NA	NA	NA	NA
A5SS	Irf2:chr8:46739760-46739796:46739760-46739936:46793492-46793585:+	chr8:46739796-46739936	NA	NA	NA	NA	NA	NA	0.856	NA	NA	NA	NA	NA	NA	NA	NA	NA	NA	NA	NA	0.943	NA	NA	NA	0.721
SE	Cdc23:chr18:34634392-34634512:34634587-34634666:34636285-34636347:-	chr18:34634587-34634666	NA	NA	NA	NA	NA	NA	0.993	NA	NA	NA	0.991	NA	NA	0.978	NA	NA	NA	NA	NA	NA	NA	0.973	NA	NA
SE	Celf2:chr2:6660292-6664197:6721416-6721613:6872355-6872597:-	chr2:6721416-6721613	0.989	0.962	0.947	0.966	0.985	0.993	0.979	NA	0.967	NA	NA	0.985	NA	NA	0.924	NA	0.977	NA	NA	NA	0.96	0.982	0.992	0.855
A3SS	Mical2:chr7:112407559-112407659:112407556-112407659:112397471-112397565:+	chr7:112407556-112407559	NA	NA	0.424	NA	NA	NA	NA	NA	NA	NA	NA	NA	NA	NA	NA	NA	NA	NA	NA	NA	NA	NA	NA	NA
SE	Slc25a19:chr11:115624198-115624368:115627636-115627799:115628064-115628295:-	chr11:115627636-115627799	0.091	0.016	0.034	0.105	0.035	0.053	0.053	NA	0.118	0.107	0.061	NA	0.035	0.026	NA	NA	NA	NA	NA	0.034	0.101	0.037	0.219	0.03
SE	Ppm1f:chr16:16917659-16917803:16922462-16922556:16923639-16927364:+	chr16:16922462-16922556	NA	NA	NA	NA	NA	NA	NA	NA	NA	NA	NA	NA	0.965	NA	NA	NA	NA	NA	NA	NA	NA	NA	NA	0.96
SE	Mbnl2:chr14:120379149-120379314:120385390-120385591:120396450-120396604:+	chr14:120385390-120385591	NA	NA	NA	NA	NA	NA	NA	0.931	NA	NA	NA	NA	NA	NA	NA	NA	NA	NA	NA	NA	0.98	NA	NA	NA
SE	Adamtsl3:chr7:82442433-82442479:82450038-82450275:82465563-82465690:+	chr7:82450038-82450275	NA	NA	NA	NA	NA	NA	NA	NA	NA	NA	NA	NA	NA	NA	NA	NA	NA	NA	NA	0.964	NA	NA	NA	NA
SE	Plekhh2:chr17:84590759-84590872:84591536-84591716:84596207-84596305:+	chr17:84591536-84591716	NA	NA	NA	NA	NA	NA	NA	NA	NA	NA	NA	NA	0.99	NA	NA	NA	NA	NA	NA	NA	NA	NA	NA	NA
A3SS	Ttc13:chr8:124676340-124676447:124676340-124676450:124679001-124679086:-	chr8:124676447-124676450	0.936	0.823	0.766	0.812	0.906	0.677	0.906	0.883	0.807	0.855	0.722	0.815	0.932	0.722	0.786	0.841	0.881	0.808	0.83	0.923	0.75	0.805	0.919	0.842
A3SS	Ahdc1:chr4:133060780-133060892:133060661-133060892:133055012-133055203:+	chr4:133060661-133060780	0.16	0.224	0.19	0.138	0.117	0.25	0.206	0.294	0.235	0.2	0.098	0.214	0.213	0.218	0.074	NA	0.218	0.372	0.065	0.203	0.126	0.565	0.156	0.433
SE	Phkb:chr8:86011016-86011072:86011569-86011663:86016858-86016942:+	chr8:86011569-86011663	NA	NA	NA	NA	NA	NA	NA	NA	NA	NA	NA	NA	0.892	NA	NA	NA	NA	NA	NA	NA	NA	NA	NA	NA
SE	Armcx1:chrX:134717987-134718050:134718369-134718461:134718725-134718818:+	chrX:134718369-134718461	0.852	0.922	0.915	NA	NA	0.903	0.969	0.923	0.901	NA	NA	NA	NA	NA	0.913	NA	0.915	0.915	NA	0.863	0.949	0.968	0.929	0.924
SE	Slfn8:chr11:83016652-83017722:83019912-83020028:83020576-83020810:-	chr11:83019912-83020028	NA	NA	NA	0.529	NA	NA	NA	NA	0.252	0.663	NA	0.529	0.273	0.101	NA	NA	NA	0.628	NA	NA	NA	NA	0.756	NA
SE	Gtpbp2:chr17:46165454-46165629:46165777-46165997:46166310-46166446:+	chr17:46165777-46165997	NA	NA	NA	NA	NA	NA	NA	NA	0.984	NA	NA	NA	NA	NA	NA	NA	NA	NA	NA	0.978	NA	NA	NA	NA
SE	Slc7a5:chr8:121884982-121885132:121885908-121886005:121886279-121886383:-	chr8:121885908-121886005	NA	NA	NA	NA	NA	NA	NA	NA	NA	NA	NA	NA	NA	NA	NA	NA	0.991	NA	0.975	NA	NA	0.956	NA	NA
SE	Ccne1:chr7:38098667-38099149:38099246-38099358:38099467-38099501:-	chr7:38099246-38099358	NA	NA	NA	NA	NA	0.962	NA	NA	NA	NA	NA	0.9	0.914	NA	NA	NA	NA	0.938	NA	0.886	NA	NA	0.976	NA
SE	Kcnc3:chr7:44598383-44598575:44598805-44598933:44600868-44600928:+	chr7:44598805-44598933	NA	NA	NA	NA	0.447	NA	NA	NA	NA	NA	NA	NA	NA	NA	NA	NA	NA	NA	NA	NA	NA	0.617	NA	NA
SE	Rcbtb2:chr14:73154314-73154894:73161939-73162095:73162326-73162337:+	chr14:73161939-73162095	NA	NA	NA	NA	NA	NA	NA	NA	NA	NA	NA	NA	NA	NA	0.981	NA	NA	NA	NA	NA	NA	NA	NA	NA
A3SS	Rpl11:chr4:136051613-136051716:136051613-136051720:136052566-136052717:-	chr4:136051716-136051720	0.998	0.999	0.999	0.997	0.999	0.998	0.998	0.999	0.999	1	0.997	0.999	NA	0.999	1	NA	0.999	NA	NA	1	1	1	NA	0.999
RI	Cenpt:chr8:105845259-105845436:105845259-105846391:105846164-105846391:-	chr8:105845436-105846164	0.828	0.824	0.605	0.754	0.706	0.661	0.729	0.896	0.467	0.725	0.916	0.727	0.729	0.635	0.543	0.473	0.726	0.592	0.576	0.663	0.669	0.553	0.659	0.916
SE	E130307A14Rik:chr10:39645555-39645808:39681472-39681549:39731737-39731814:-	chr10:39681472-39681549	NA	NA	NA	NA	NA	NA	NA	NA	NA	NA	0.698	NA	NA	NA	NA	NA	NA	0.698	NA	NA	0.841	NA	NA	NA
SE	Nagk:chr6:83796906-83796991:83797176-83797275:83797955-83798097:+	chr6:83797176-83797275	NA	0.991	NA	0.977	NA	NA	NA	NA	NA	NA	NA	NA	NA	NA	NA	NA	NA	NA	NA	NA	NA	NA	NA	NA
SE	Fam118b:chr9:35227163-35227391:35235230-35235483:35267722-35267755:-	chr9:35235230-35235483	NA	NA	NA	NA	NA	NA	NA	NA	NA	NA	NA	NA	NA	0.976	NA	NA	NA	NA	NA	NA	NA	NA	NA	NA
SE	Dlgap4:chr2:156721491-156722102:156745834-156746196:156748331-156748403:+	chr2:156745834-156746196	NA	NA	NA	NA	0.991	NA	NA	NA	NA	NA	NA	NA	NA	NA	NA	NA	NA	NA	NA	NA	0.985	NA	NA	NA
SE	Ccdc25:chr14:65837301-65837484:65840447-65840495:65846295-65846335:+	chr14:65840447-65840495	NA	NA	0.955	0.991	NA	0.983	NA	0.979	NA	NA	0.983	NA	NA	NA	0.884	NA	0.974	NA	NA	NA	NA	NA	NA	0.99
SE	Chd6:chr2:160946977-160950187:160956082-160956202:160957035-160957227:-	chr2:160956082-160956202	NA	0.974	NA	0.952	NA	NA	0.956	NA	NA	0.974	NA	NA	NA	NA	NA	NA	0.971	NA	NA	0.983	0.83	0.978	0.967	NA
A3SS	Mapk8ip3:chr17:24917994-24918136:24917994-24918139:24923815-24923907:-	chr17:24918136-24918139	0.936	0.795	0.746	0.838	0.925	0.955	0.815	0.847	0.905	0.981	0.9	0.791	0.927	0.838	0.847	0.953	0.864	0.866	0.977	0.862	0.857	0.783	0.87	0.866
RI	Mical1:chr10:41478009-41478314:41478009-41478635:41478427-41478635:+	chr10:41478314-41478427	0.087	NA	NA	0.102	0.102	0.037	NA	0.07	0.031	0.112	0.124	NA	0.032	0.079	NA	NA	0.221	0.056	NA	NA	0.173	NA	NA	0.221
SE	Rin3:chr12:102382552-102382684:102387553-102387717:102389823-102390855:+	chr12:102387553-102387717	NA	NA	NA	NA	NA	NA	NA	NA	NA	NA	NA	NA	NA	NA	NA	NA	NA	NA	NA	0.966	NA	NA	NA	NA
A3SS	Tor2a:chr2:32758756-32758936:32758670-32758936:32757318-32757539:+	chr2:32758670-32758756	NA	NA	NA	NA	NA	NA	NA	NA	NA	NA	NA	0.869	NA	NA	NA	NA	NA	0.89	NA	0.912	NA	NA	NA	NA
SE	Osmr:chr15:6836757-6837831:6841952-6842104:6844220-6844499:-	chr15:6841952-6842104	NA	NA	NA	NA	NA	NA	NA	NA	NA	NA	NA	NA	NA	NA	NA	NA	NA	NA	NA	NA	NA	0.98	NA	NA
SE	Oaz2:chr9:65686195-65686353:65687797-65687973:65688820-65688882:+	chr9:65687797-65687973	0.993	NA	NA	NA	NA	NA	NA	NA	NA	NA	NA	NA	NA	NA	NA	NA	NA	0.997	NA	NA	NA	NA	NA	NA
SE	Depdc5:chr5:32955852-32955958:32959280-32959346:32964631-32964783:+	chr5:32959280-32959346	0.138	0.034	0.035	0.274	NA	0.033	0.136	NA	0.095	0.331	NA	NA	NA	NA	0.072	NA	0.03	0.032	0.044	0.071	0.071	0.054	NA	0.044
SE	Cnot2:chr10:116504034-116504114:116506228-116506411:116507040-116507188:-	chr10:116506228-116506411	0.985	0.988	NA	NA	NA	NA	NA	NA	0.972	NA	NA	0.989	NA	NA	NA	NA	0.973	NA	NA	NA	NA	NA	NA	NA
A5SS	Slc6a9:chr4:117855874-117855948:117855874-117855986:117856689-117856821:+	chr4:117855948-117855986	NA	NA	NA	NA	NA	0.443	NA	NA	NA	NA	NA	0.443	NA	0.443	NA	NA	NA	0.705	NA	NA	NA	NA	NA	0.864
A3SS	Akap8l:chr17:32333905-32333980:32333905-32334045:32334587-32334696:-	chr17:32333980-32334045	NA	NA	NA	NA	NA	NA	NA	NA	NA	NA	NA	NA	NA	NA	NA	NA	NA	NA	NA	NA	0.901	NA	NA	NA
SE	Slc4a4:chr5:89228825-89228987:89232763-89232860:89234796-89234861:+	chr5:89232763-89232860	NA	NA	0.985	0.98	0.977	NA	NA	NA	0.923	NA	0.934	NA	NA	NA	NA	NA	NA	NA	NA	NA	NA	NA	NA	NA
SE	Rab11fip3:chr17:26008854-26008890:26011996-26012131:26013773-26013917:-	chr17:26011996-26012131	0.466	0.658	0.66	0.739	0.746	0.782	0.647	0.556	0.746	0.629	0.684	0.698	0.87	0.602	0.625	NA	0.84	0.786	0.715	0.529	0.795	0.743	0.629	0.852
A3SS	Gnptg:chr17:25235344-25235459:25235344-25235480:25235533-25235627:-	chr17:25235459-25235480	0.052	0.017	0.026	0.066	0.041	0.009	0.046	NA	NA	0.076	0.029	NA	0.017	NA	0.005	NA	0.02	0.065	0.019	0.064	0.021	0.061	0.062	0.035
SE	Phf2:chr13:48832003-48832118:48835209-48835295:48870667-48871119:-	chr13:48835209-48835295	NA	0.98	NA	NA	NA	NA	NA	NA	NA	NA	NA	NA	NA	NA	NA	NA	NA	NA	NA	NA	NA	NA	NA	NA
SE	Psmc3:chr2:91055457-91055562:91055647-91055710:91055904-91056042:+	chr2:91055647-91055710	NA	NA	NA	0.995	NA	NA	NA	NA	NA	NA	NA	NA	NA	NA	NA	NA	NA	NA	NA	NA	NA	NA	NA	NA
SE	Decr1:chr4:15917239-15919094:15919193-15919256:15919831-15919978:-	chr4:15919193-15919256	NA	NA	NA	NA	NA	NA	NA	NA	NA	NA	NA	NA	NA	NA	NA	NA	NA	NA	NA	NA	NA	NA	0.989	NA
SE	Colq:chr14:31543987-31544032:31544658-31544685:31545056-31545119:-	chr14:31544658-31544685	NA	NA	NA	0.792	NA	NA	NA	NA	NA	NA	NA	NA	NA	NA	NA	NA	NA	NA	NA	NA	NA	NA	NA	NA
SE	Chsy1:chr7:66109514-66110227:66125241-66125737:66170831-66173798:+	chr7:66125241-66125737	NA	0.951	NA	NA	NA	NA	0.989	NA	NA	NA	NA	NA	NA	NA	NA	NA	NA	NA	NA	NA	NA	NA	NA	NA
SE	Mrpl4:chr9:21003253-21003404:21005862-21005886:21006133-21006185:+	chr9:21005862-21005886	NA	NA	NA	NA	NA	NA	NA	NA	NA	NA	NA	NA	NA	NA	0.006	NA	NA	NA	0.006	NA	NA	NA	NA	NA
RI	Pla2g4b:chr2:120034919-120035056:120034919-120035324:120035195-120035324:+	chr2:120035056-120035195	NA	0.463	NA	0.115	0.045	0.244	0.069	NA	NA	0.115	0.297	0.341	NA	0.134	NA	NA	0.206	0.171	NA	0.098	0.162	0.074	0.223	NA
SE	Psmd8:chr7:29176072-29176173:29177065-29177231:29178918-29179021:-	chr7:29177065-29177231	0.998	NA	NA	NA	NA	NA	NA	NA	NA	NA	NA	NA	NA	NA	NA	NA	NA	NA	NA	NA	NA	NA	NA	NA
A5SS	Piga:chrX:164422583-164423363:164422583-164423672:164427931-164428064:+	chrX:164423363-164423672	0.328	0.258	0.58	0.565	0.245	0.042	0.44	0.035	0.281	0.289	0.631	0.098	0.157	0.14	0.196	0.394	0.449	0.394	0.738	0.155	0.48	0.106	0.191	0.374
SE	Btbd7:chr12:102780796-102785932:102787934-102788384:102790704-102790883:-	chr12:102787934-102788384	NA	NA	NA	NA	NA	NA	NA	NA	0.963	NA	NA	NA	NA	NA	NA	NA	NA	NA	NA	NA	NA	NA	NA	NA
SE	Fndc1:chr17:7758461-7758530:7764957-7765407:7766387-7766499:-	chr17:7764957-7765407	NA	0.998	0.994	NA	NA	0.984	NA	NA	NA	0.914	NA	NA	NA	NA	0.982	NA	0.997	NA	NA	NA	NA	NA	NA	0.997
SE	Mapkapk3:chr9:107258329-107258454:107258813-107258889:107260044-107260168:-	chr9:107258813-107258889	NA	NA	0.926	NA	NA	NA	NA	NA	NA	NA	NA	NA	NA	NA	NA	NA	NA	NA	NA	NA	NA	0.916	NA	NA
SE	Smurf2:chr11:106824608-106824810:106828503-106828624:106830919-106831057:-	chr11:106828503-106828624	NA	0.988	NA	0.977	NA	0.994	0.979	NA	NA	NA	NA	NA	NA	NA	NA	NA	NA	NA	NA	NA	0.98	0.988	NA	NA
A5SS	Ccdc32:chr2:119029316-119029393:119029307-119029393:119027137-119027387:-	chr2:119029307-119029316	0.214	0.335	0.334	0.216	0.381	0.444	0.225	0.361	0.202	0.566	0.394	0.27	0.731	0.251	0.218	NA	0.397	0.42	0.425	0.356	0.291	0.176	0.287	0.242
SE	Inip:chr4:59769636-59772459:59773915-59774006:59775446-59775549:-	chr4:59773915-59774006	NA	NA	NA	NA	0.948	0.825	NA	0.886	NA	NA	NA	NA	NA	NA	NA	NA	0.951	NA	NA	NA	0.972	NA	NA	NA
A3SS	Ipo4:chr14:55628591-55628639:55628591-55628684:55628793-55628987:-	chr14:55628639-55628684	0.011	0.008	0.029	0.003	0.016	0.048	0.01	0.009	0.014	0.009	0.024	0.008	0.005	0.009	0.015	NA	0.021	0.011	NA	0.039	0.026	0.027	0.007	0.019
SE	Prdm10:chr9:31314726-31316334:31318511-31318571:31325626-31325834:+	chr9:31318511-31318571	NA	NA	NA	NA	NA	NA	NA	NA	NA	NA	NA	NA	NA	0.811	0.895	NA	NA	NA	NA	NA	NA	NA	NA	NA
SE	Ldb3:chr14:34567397-34567567:34576985-34577344:34578594-34578670:-	chr14:34576985-34577344	0.638	NA	NA	NA	NA	NA	NA	NA	0.919	NA	NA	NA	NA	0.37	NA	NA	NA	NA	NA	0.963	NA	NA	NA	NA
SE	Ccdc88a:chr11:29499334-29499406:29500975-29501056:29503382-29503518:+	chr11:29500975-29501056	NA	NA	NA	NA	NA	NA	NA	NA	NA	NA	0.985	0.877	NA	0.93	NA	NA	0.983	NA	NA	NA	0.962	NA	NA	NA
SE	Ncaph2:chr15:89369807-89369915:89370024-89370078:89370237-89370308:+	chr15:89370024-89370078	NA	NA	NA	NA	NA	NA	NA	NA	NA	NA	NA	NA	NA	NA	NA	NA	NA	NA	NA	NA	NA	NA	0.987	NA
SE	Lpp:chr16:24448090-24448248:24456832-24456942:24559591-24559657:+	chr16:24456832-24456942	NA	NA	NA	NA	NA	NA	NA	NA	NA	NA	NA	NA	NA	NA	NA	NA	NA	0.989	NA	NA	0.979	0.991	NA	NA
SE	Ptpn1:chr2:167951955-167952079:167958161-167958621:167963627-167963687:+	chr2:167958161-167958621	NA	0.047	NA	NA	NA	NA	NA	NA	NA	NA	NA	NA	NA	NA	NA	NA	NA	NA	NA	NA	NA	NA	NA	NA
SE	Hpf1:chr8:60890444-60890536:60896737-60896836:60903999-60904087:+	chr8:60896737-60896836	NA	0.375	0.75	NA	NA	NA	NA	NA	NA	NA	NA	NA	NA	NA	0.513	NA	0.167	NA	0.457	NA	NA	0.678	NA	NA
SE	Irf3:chr7:45000371-45001022:45001672-45001788:45002163-45002347:+	chr7:45001672-45001788	NA	NA	NA	NA	NA	NA	NA	0.969	0.975	0.903	NA	NA	0.965	NA	NA	NA	NA	NA	NA	0.981	0.989	NA	NA	NA
SE	Cttn:chr7:144441698-144441847:144452026-144452137:144454675-144454786:-	chr7:144452026-144452137	NA	NA	NA	NA	NA	NA	NA	NA	NA	NA	NA	NA	0.8	NA	NA	NA	NA	NA	NA	NA	NA	NA	NA	NA
SE	Map1a:chr2:121298596-121298679:121298905-121299046:121299268-121307372:+	chr2:121298905-121299046	NA	NA	NA	0.832	NA	NA	NA	NA	NA	NA	NA	NA	NA	0.981	NA	NA	NA	NA	NA	NA	NA	NA	NA	NA
SE	Ssh2:chr11:77216286-77216515:77278145-77278226:77327452-77327496:+	chr11:77278145-77278226	NA	0.493	0.245	0.722	0.393	0.564	0.564	0.393	0.393	0.866	0.341	0.564	0.564	0.393	NA	NA	0.217	0.66	NA	0.316	NA	NA	NA	0.245
SE	Supt3:chr17:44994316-44994407:45003089-45003229:45033237-45033313:+	chr17:45003089-45003229	NA	NA	NA	NA	NA	NA	NA	NA	NA	0.96	NA	NA	NA	NA	NA	NA	NA	NA	NA	NA	NA	NA	NA	NA
SE	Tacc2:chr7:130728522-130729828:130731530-130731566:130733505-130733566:+	chr7:130731530-130731566	NA	NA	0.042	NA	NA	NA	NA	NA	NA	NA	NA	NA	0.035	0.02	NA	NA	0.044	0.016	NA	0.013	NA	NA	0.027	NA
SE	Dmkn:chr7:30777761-30777809:30778200-30778269:30779677-30779704:+	chr7:30778200-30778269	NA	NA	NA	NA	NA	NA	NA	NA	NA	NA	NA	NA	NA	NA	NA	NA	NA	NA	NA	0.957	0.976	NA	NA	NA
SE	Mbtd1:chr11:93886207-93886416:93887021-93887073:93905158-93905358:+	chr11:93887021-93887073	0.576	0.65	0.175	0.803	0.69	0.481	0.198	NA	0.038	0.405	0.503	0.426	0.712	0.543	0.317	NA	0.748	0.527	NA	0.735	0.497	0.27	0.397	NA
RI	Mapk7:chr11:61492903-61493069:61492903-61494266:61493505-61494266:-	chr11:61493069-61493505	0.113	0.718	0.364	0.587	0.678	0.276	NA	NA	0.56	0.56	0.404	0.57	0.825	NA	0.572	NA	0.368	0.688	0.267	0.817	0.169	0.185	0.574	0.803
SE	Ptk2:chr15:73360025-73360337:73392343-73392447:73394647-73394744:-	chr15:73392343-73392447	NA	NA	NA	NA	NA	NA	NA	0.884	NA	NA	NA	NA	NA	NA	NA	NA	NA	NA	NA	NA	NA	NA	NA	NA
A3SS	Npdc1:chr2:25407843-25408014:25407840-25408014:25407595-25407736:+	chr2:25407840-25407843	0.974	0.962	0.943	0.963	0.984	0.949	0.974	0.96	0.976	0.961	0.982	0.979	0.961	0.936	0.951	NA	0.94	0.978	0.979	0.96	0.972	0.97	0.961	0.964
A5SS	Plk3:chr4:117131112-117131153:117131061-117131153:117130723-117130817:-	chr4:117131061-117131112	NA	NA	0.989	NA	NA	NA	NA	NA	NA	NA	NA	NA	NA	NA	0.993	NA	NA	NA	NA	NA	NA	NA	NA	0.981
A3SS	Crem:chr18:3266355-3267732:3266355-3268129:3273421-3273578:-	chr18:3267732-3268129	0.722	0.652	0.673	0.756	0.823	0.762	0.631	0.773	0.654	0.773	0.675	0.818	0.886	0.958	0.713	0.874	0.566	0.91	0.696	0.704	0.715	0.558	0.572	0.721
SE	Ttc7:chr17:87292810-87292979:87294008-87294066:87306928-87307059:+	chr17:87294008-87294066	0.049	0.142	0.041	0.185	0.059	NA	0.03	0.044	NA	0.063	0.1	NA	0.097	NA	0.049	NA	0.194	NA	0.236	0.067	0.194	0.247	NA	0.153
RI	Kiss1r:chr10:79920694-79920830:79920694-79921247:79921014-79921247:+	chr10:79920830-79921014	0.642	0.309	0.13	0.439	0.075	0.472	0.204	NA	0.451	NA	0.183	0.472	NA	NA	0.152	NA	0.402	0.101	NA	0.494	NA	0.359	0.349	0.711
SE	Ext2:chr2:93762552-93762684:93791009-93791103:93795634-93795774:-	chr2:93791009-93791103	NA	NA	NA	NA	NA	NA	NA	NA	NA	NA	NA	NA	0.996	NA	NA	NA	NA	0.996	NA	NA	NA	NA	NA	NA
RI	Fech:chr18:64457264-64458217:64457264-64458714:64458654-64458714:-	chr18:64458217-64458654	0.02	0.024	0.022	0.019	0.013	0.016	0.016	0.01	0.015	0.011	0.019	0.02	0.023	0.031	0.006	0.055	0.013	0.02	0.011	0.013	0.025	0.024	0.021	0.031
SE	Baz2b:chr2:59933670-59933715:59935214-59935280:59936685-59936751:-	chr2:59935214-59935280	0.872	NA	0.862	0.9	NA	NA	NA	NA	NA	NA	NA	0.896	NA	0.934	NA	NA	NA	NA	NA	NA	NA	NA	NA	NA
SE	Cenpf:chr1:189671047-189671176:189672508-189672634:189678938-189679141:-	chr1:189672508-189672634	NA	NA	NA	NA	NA	NA	NA	NA	NA	NA	NA	0.89	NA	NA	NA	NA	NA	NA	NA	NA	NA	NA	NA	NA
SE	Gstz1:chr12:87157607-87157660:87157892-87157944:87159077-87159145:+	chr12:87157892-87157944	0.996	NA	NA	NA	NA	NA	NA	NA	NA	NA	NA	NA	NA	NA	NA	NA	NA	NA	NA	NA	NA	NA	NA	NA
RI	Psmd3:chr11:98690462-98690653:98690462-98691019:98690915-98691019:+	chr11:98690653-98690915	0.069	0.032	0.07	0.066	0.032	0.074	0.044	0.059	0.052	0.049	0.029	0.058	0.073	0.064	0.064	0.012	0.061	0.025	0.052	0.052	0.048	0.024	0.065	0.059
SE	Hagh:chr17:24860945-24861049:24861312-24861414:24863676-24863724:+	chr17:24861312-24861414	NA	NA	0.987	NA	0.996	0.978	0.986	0.974	0.979	0.986	NA	NA	NA	NA	NA	NA	NA	NA	NA	0.993	NA	0.992	NA	NA
RI	Metap1d:chr2:71509740-71509890:71509740-71511560:71511411-71511560:+	chr2:71509890-71511411	0.537	0.62	0.458	0.521	0.534	0.687	0.628	0.696	0.562	0.538	0.587	0.591	0.566	0.646	0.349	0.376	0.582	0.667	0.524	0.593	0.565	0.465	0.722	0.462
SE	Bmp5:chr9:75828017-75828210:75839544-75839693:75873254-75873449:+	chr9:75839544-75839693	NA	NA	0.964	NA	NA	NA	NA	NA	NA	NA	NA	NA	NA	NA	NA	NA	NA	NA	NA	NA	NA	NA	NA	NA
SE	Lsm3:chr6:91517047-91517158:91519548-91519644:91522240-91522620:+	chr6:91519548-91519644	0.997	NA	NA	NA	NA	NA	NA	NA	NA	NA	NA	NA	NA	0.989	NA	NA	NA	NA	NA	NA	NA	NA	NA	NA
SE	Farp2:chr1:93577647-93577705:93579739-93579998:93599922-93600101:+	chr1:93579739-93579998	NA	NA	NA	NA	NA	NA	NA	NA	NA	NA	NA	NA	NA	NA	NA	NA	NA	NA	NA	0.969	NA	NA	NA	NA
RI	Ift122:chr6:115913871-115913974:115913871-115916047:115915906-115916047:+	chr6:115913974-115915906	0.048	0.109	0.054	0.075	0.051	0.039	0.068	0.105	0.041	0.04	0.047	0.081	0.079	0.085	0.065	NA	0.129	0.08	0.079	0.072	0.05	0.04	0.053	0.067
SE	Kcna6:chr6:126708330-126708707:126727479-126727585:126735214-126736811:-	chr6:126727479-126727585	NA	NA	NA	NA	0.163	0.105	NA	0.163	NA	NA	NA	0.577	NA	NA	NA	NA	NA	NA	NA	NA	NA	NA	0.096	NA
SE	Zfc3h1:chr10:115423204-115423310:115423383-115423582:115424557-115424652:+	chr10:115423383-115423582	NA	NA	NA	NA	NA	NA	NA	NA	0.942	NA	NA	NA	NA	NA	0.938	NA	0.984	NA	NA	NA	NA	0.972	NA	NA
SE	Nupl2:chr5:24169295-24169390:24177999-24178086:24181080-24181165:+	chr5:24177999-24178086	NA	0.938	NA	NA	NA	NA	NA	NA	NA	NA	NA	NA	NA	NA	NA	NA	NA	NA	NA	NA	NA	NA	NA	NA
SE	Adtrp:chr13:41816137-41816272:41828142-41828385:41847490-41847616:-	chr13:41828142-41828385	NA	NA	NA	NA	NA	NA	NA	NA	NA	NA	0.655	NA	NA	NA	NA	NA	NA	NA	NA	NA	NA	NA	NA	NA
RI	Tie1:chr4:118478861-118479152:118478861-118479903:118479612-118479903:-	chr4:118479152-118479612	NA	NA	NA	NA	NA	NA	NA	NA	NA	NA	NA	NA	NA	NA	NA	NA	NA	NA	NA	NA	NA	NA	NA	0.595
SE	Pth1r:chr9:110726442-110726596:110726969-110727165:110727410-110727505:-	chr9:110726969-110727165	NA	NA	NA	NA	NA	NA	0.991	NA	0.985	NA	0.981	NA	NA	NA	NA	NA	NA	NA	NA	NA	0.961	NA	NA	NA
SE	Cryl1:chr14:57312967-57313129:57352635-57352740:57362921-57363048:-	chr14:57352635-57352740	NA	NA	NA	0.049	NA	NA	0.025	NA	NA	NA	NA	0.026	0.017	NA	NA	NA	NA	NA	NA	NA	NA	0.034	NA	NA
SE	Arid5a:chr1:36307753-36307836:36311873-36311968:36316211-36316578:+	chr1:36311873-36311968	NA	NA	NA	NA	NA	NA	NA	NA	NA	NA	NA	NA	NA	NA	NA	NA	NA	0.289	NA	NA	NA	NA	NA	NA
SE	Als2cl:chr9:110888685-110888752:110889104-110889301:110889706-110889772:+	chr9:110889104-110889301	NA	NA	NA	NA	NA	NA	0.961	NA	NA	NA	NA	NA	NA	NA	NA	NA	NA	NA	NA	NA	NA	NA	NA	NA
SE	Plekhm3:chr1:64789120-64795214:64819935-64820093:64861186-64861250:-	chr1:64819935-64820093	NA	0.921	NA	NA	NA	NA	NA	NA	NA	NA	NA	NA	NA	NA	NA	NA	NA	NA	NA	NA	0.943	NA	NA	NA
SE	Trip13:chr13:73919994-73920101:73920347-73920448:73921172-73921214:-	chr13:73920347-73920448	NA	NA	NA	NA	NA	NA	NA	NA	NA	NA	NA	0.641	NA	NA	NA	NA	NA	NA	NA	NA	NA	NA	NA	NA
A5SS	Ywhae:chr11:75755573-75755652:75755573-75755680:75756816-75757116:+	chr11:75755652-75755680	0.995	0.999	NA	NA	NA	NA	NA	NA	NA	NA	NA	NA	NA	NA	NA	NA	0.999	NA	NA	NA	NA	0.999	NA	NA
SE	Ube2s:chr7:4808013-4808484:4810421-4810612:4811408-4811556:-	chr7:4810421-4810612	NA	NA	NA	NA	NA	NA	NA	NA	NA	NA	0.994	NA	NA	NA	NA	NA	0.998	NA	NA	NA	NA	NA	NA	NA
SE	Prxl2b:chr4:154897039-154897158:154897348-154897424:154897505-154897569:-	chr4:154897348-154897424	NA	NA	NA	NA	NA	NA	NA	NA	NA	NA	NA	NA	NA	NA	NA	NA	NA	NA	NA	NA	NA	NA	0.984	NA
RI	Eef1a1:chr9:78479277-78479534:78479277-78479774:78479623-78479774:-	chr9:78479534-78479623	0.021	0.02	0.023	0.018	0.019	0.018	0.02	0.019	0.019	0.016	0.015	0.018	0.015	0.019	0.02	0.013	0.02	0.019	0.014	0.018	0.019	0.021	0.018	0.019
SE	Fam172a:chr13:77999585-77999702:78006387-78006472:78163512-78163655:+	chr13:78006387-78006472	NA	NA	NA	NA	NA	NA	NA	NA	NA	NA	NA	NA	NA	NA	NA	NA	NA	0.971	NA	NA	NA	NA	NA	NA
SE	Armc8:chr9:99537687-99537759:99551542-99551619:99568601-99568649:-	chr9:99551542-99551619	0.841	0.625	0.735	0.898	0.896	0.841	0.886	0.732	0.767	0.976	0.837	0.804	0.952	0.818	0.557	NA	0.862	0.9	NA	0.861	NA	0.763	0.739	0.757
SE	Spc25:chr2:69205025-69205178:69205829-69205882:69206063-69206180:-	chr2:69205829-69205882	0.269	NA	NA	NA	0.228	0.33	NA	0.47	NA	NA	NA	NA	0.145	0.032	NA	NA	0.069	NA	0.425	0.291	NA	NA	NA	NA
SE	Ocrl:chrX:47943505-47943641:47944466-47944613:47947002-47947113:+	chrX:47944466-47944613	NA	NA	NA	NA	NA	NA	NA	NA	NA	NA	NA	NA	0.01	NA	NA	NA	NA	NA	NA	NA	NA	NA	NA	NA
SE	Sft2d2:chr1:165185007-165185089:165186721-165186888:165187968-165188054:-	chr1:165186721-165186888	NA	NA	NA	NA	NA	NA	NA	NA	NA	NA	0.005	NA	NA	NA	NA	NA	NA	NA	NA	0.071	NA	NA	NA	NA
SE	Myo5a:chr9:75120672-75120844:75122910-75123055:75129971-75130128:+	chr9:75122910-75123055	NA	NA	NA	0.961	NA	NA	NA	NA	NA	NA	NA	NA	NA	NA	NA	NA	NA	NA	NA	NA	NA	NA	NA	NA
SE	Camk2g:chr14:20745791-20745860:20747818-20747851:20755658-20755702:-	chr14:20747818-20747851	NA	NA	0.007	0.036	0.036	NA	0.013	NA	0.042	0.029	0.044	0.008	NA	0.013	NA	NA	0.006	NA	NA	0.04	0.046	0.019	NA	NA
SE	Cspg5:chr9:110246064-110247390:110250958-110251147:110256144-110256220:+	chr9:110250958-110251147	NA	NA	NA	NA	NA	NA	NA	NA	NA	0.936	NA	NA	NA	NA	NA	NA	NA	NA	NA	NA	NA	NA	NA	NA
SE	Sept8:chr11:53535947-53536109:53536651-53536748:53537153-53537322:+	chr11:53536651-53536748	NA	NA	NA	NA	0.977	NA	NA	NA	NA	NA	NA	NA	NA	0.995	NA	NA	NA	NA	NA	NA	NA	NA	NA	NA
SE	Ndufa7:chr17:33824612-33824680:33827801-33827908:33829666-33829807:+	chr17:33827801-33827908	NA	NA	NA	NA	NA	0.013	0.029	NA	NA	NA	NA	NA	NA	NA	NA	NA	0.031	NA	NA	NA	NA	NA	0.034	NA
SE	Mapkap1:chr2:34533787-34533897:34563054-34563162:34581191-34581332:+	chr2:34563054-34563162	0.955	0.965	0.973	0.989	NA	0.979	0.975	0.98	0.989	0.938	0.986	0.988	0.954	0.953	0.978	NA	0.866	0.984	0.891	0.98	0.942	0.952	0.979	0.907
SE	Auts2:chr5:131461281-131461353:131466031-131466127:131472237-131472479:-	chr5:131466031-131466127	NA	NA	NA	NA	NA	NA	NA	NA	NA	NA	NA	NA	NA	NA	NA	NA	NA	NA	NA	NA	0.943	NA	NA	NA
SE	Creb3l2:chr6:37363967-37364143:37379811-37380028:37441698-37442146:-	chr6:37379811-37380028	NA	NA	NA	NA	NA	NA	NA	NA	NA	NA	NA	NA	NA	NA	0.974	NA	NA	NA	NA	NA	NA	0.964	NA	NA
SE	Nfatc3:chr8:106099071-106099212:106100933-106100989:106104024-106104151:+	chr8:106100933-106100989	NA	NA	0.973	NA	NA	0.923	0.963	NA	0.934	0.979	NA	NA	0.953	NA	NA	NA	NA	0.983	0.989	NA	NA	0.985	NA	NA
SE	Timp1:chrX:20870165-20870324:20872776-20872856:20873049-20873176:+	chrX:20872776-20872856	NA	NA	NA	NA	NA	NA	NA	NA	NA	NA	NA	NA	NA	0.996	NA	NA	NA	NA	NA	NA	NA	NA	0.999	NA
SE	Fam172a:chr13:77759427-77759529:77761837-77761938:77825322-77825388:+	chr13:77761837-77761938	0.952	0.971	NA	NA	NA	0.983	NA	NA	NA	NA	NA	NA	0.966	NA	NA	NA	NA	NA	0.975	NA	NA	0.864	NA	0.916
SE	Crebl2:chr6:134849102-134849300:134851079-134851224:134852277-134852314:+	chr6:134851079-134851224	NA	0.868	0.872	NA	NA	0.972	NA	0.936	NA	0.977	NA	0.916	NA	NA	NA	NA	NA	NA	NA	NA	NA	NA	NA	NA
SE	Abi3bp:chr16:56613166-56613253:56614689-56614752:56642488-56642560:+	chr16:56614689-56614752	NA	NA	NA	NA	NA	NA	NA	NA	NA	NA	0.319	NA	NA	NA	NA	NA	NA	NA	NA	NA	NA	NA	NA	NA
SE	Zfp384:chr6:125024745-125025082:125025847-125025940:125030797-125031022:+	chr6:125025847-125025940	0.5	0.666	0.681	0.412	0.581	0.518	0.649	0.621	0.575	0.367	0.537	0.548	0.601	0.591	0.63	NA	0.79	0.483	0.387	0.53	0.436	0.674	0.667	0.448
SE	A930006K02Rik:chr16:91465024-91465636:91467743-91467825:91469671-91470128:+	chr16:91467743-91467825	NA	NA	NA	NA	NA	NA	NA	NA	NA	NA	NA	NA	NA	NA	NA	NA	NA	NA	NA	NA	0.563	NA	NA	NA
SE	Dicer1:chr12:104692302-104692465:104694477-104694746:104696273-104697144:-	chr12:104694477-104694746	NA	NA	NA	NA	NA	NA	0.985	NA	NA	NA	NA	NA	NA	NA	NA	NA	0.904	NA	NA	NA	NA	NA	NA	NA
A5SS	Naa35:chr13:59600903-59601044:59600903-59601071:59607245-59607312:+	chr13:59601044-59601071	0.988	NA	NA	NA	NA	0.985	NA	NA	NA	NA	NA	0.975	NA	NA	NA	NA	NA	NA	NA	NA	NA	NA	NA	NA
SE	Abce1:chr8:79699346-79699436:79700585-79700682:79700912-79700982:-	chr8:79700585-79700682	NA	0.984	NA	NA	NA	NA	NA	NA	NA	NA	NA	0.987	NA	NA	NA	NA	NA	0.993	NA	NA	NA	NA	NA	NA
SE	Gabbr1:chr17:37048577-37048606:37049652-37049797:37050998-37051127:+	chr17:37049652-37049797	0.503	0.068	0.275	0.145	0.67	0.06	0.126	NA	NA	NA	0.202	0.527	NA	NA	NA	NA	NA	0.336	NA	NA	NA	0.169	0.16	0.169
SE	Tnfrsf26:chr7:143618309-143618438:143619342-143619430:143627797-143627953:-	chr7:143619342-143619430	NA	NA	NA	NA	NA	NA	NA	NA	NA	NA	NA	NA	NA	NA	NA	NA	NA	NA	NA	NA	NA	NA	NA	0.965
SE	1700001L05Rik:chr15:83357559-83358950:83363819-83363928:83365028-83365510:-	chr15:83363819-83363928	0.634	0.536	NA	0.302	NA	NA	NA	NA	0.722	NA	0.698	NA	0.435	0.05	NA	NA	0.161	0.224	NA	0.344	0.104	NA	0.698	NA
A5SS	Mprip:chr11:59737071-59737228:59737071-59737582:59741119-59741261:+	chr11:59737228-59737582	0.32	0.227	0.242	0.351	0.356	0.317	0.365	0.217	0.316	0.35	0.331	0.306	0.207	0.286	0.282	0.037	0.185	0.313	0.22	0.388	0.326	0.199	0.335	0.281
SE	Pex7:chr10:19869293-19869393:19884777-19884833:19887059-19887173:-	chr10:19884777-19884833	NA	NA	NA	NA	NA	NA	NA	NA	NA	NA	NA	0.981	NA	NA	NA	NA	NA	NA	NA	NA	NA	NA	NA	NA
SE	Clic1:chr17:35053032-35053139:35055226-35055408:35058329-35058749:+	chr17:35055226-35055408	NA	NA	0.998	NA	NA	0.999	0.998	0.994	NA	NA	NA	NA	NA	0.997	NA	NA	NA	NA	NA	NA	NA	NA	0.998	NA
SE	Dph7:chr2:24962422-24962810:24963022-24963156:24963455-24963543:+	chr2:24963022-24963156	NA	NA	NA	NA	NA	NA	NA	0.963	NA	NA	NA	NA	NA	NA	NA	NA	NA	NA	NA	NA	NA	NA	NA	NA
SE	Habp4:chr13:64170013-64170176:64174062-64174221:64174789-64174858:+	chr13:64174062-64174221	NA	NA	NA	NA	NA	NA	NA	NA	NA	NA	NA	NA	NA	NA	NA	NA	0.951	NA	NA	NA	NA	NA	NA	NA
SE	Gripap1:chrX:7803322-7803400:7803593-7803686:7804359-7804494:+	chrX:7803593-7803686	NA	0.02	0.058	0.084	NA	0.012	0.071	NA	NA	0.052	0.019	0.085	0.198	0.081	0.068	NA	0.027	0.077	0.058	0.167	0.062	0.031	0.023	0.008
SE	1300002E11Rik:chr16:21801280-21801356:21802954-21803097:21808677-21808820:+	chr16:21802954-21803097	0.338	NA	0.203	0.671	0.338	NA	NA	NA	0.718	0.561	0.203	NA	0.38	0.781	NA	NA	NA	NA	NA	0.338	NA	NA	NA	NA
SE	Trdn:chr10:33332435-33332465:33333231-33333249:33334981-33335014:+	chr10:33333231-33333249	NA	NA	0.843	0.941	NA	NA	NA	NA	NA	0.889	NA	NA	NA	NA	NA	NA	NA	NA	NA	0.928	NA	NA	NA	NA
SE	Stau2:chr1:16486019-16486150:16487614-16487969:16509341-16509408:-	chr1:16487614-16487969	NA	NA	NA	NA	NA	NA	NA	NA	NA	NA	NA	NA	NA	NA	NA	NA	NA	0.09	NA	NA	NA	NA	NA	NA
SE	Psmb3:chr11:97706797-97706905:97711101-97711279:97712436-97712531:+	chr11:97711101-97711279	0.995	0.994	0.997	NA	NA	NA	0.992	NA	0.996	NA	NA	NA	NA	NA	0.999	0.987	NA	0.991	NA	NA	NA	NA	0.997	0.994
SE	Gripap1:chrX:7794259-7794286:7794991-7795099:7799289-7799428:+	chrX:7794991-7795099	0.976	NA	0.985	NA	NA	0.983	0.982	NA	0.921	NA	NA	NA	NA	NA	0.927	NA	NA	NA	NA	NA	NA	NA	NA	NA
SE	Dennd2c:chr3:103157643-103157821:103161547-103161589:103162990-103163096:+	chr3:103161547-103161589	NA	0.839	NA	0.93	NA	NA	NA	NA	NA	NA	NA	NA	NA	NA	0.701	NA	0.903	NA	NA	NA	NA	0.945	NA	NA
SE	Zcrb1:chr15:93387746-93387859:93395586-93395615:93397169-93397255:-	chr15:93395586-93395615	NA	NA	NA	NA	NA	NA	NA	NA	NA	NA	NA	NA	NA	NA	0.968	NA	NA	NA	NA	NA	NA	NA	NA	NA
SE	Hipk2:chr6:38747873-38747997:38818229-38819313:38875798-38875923:-	chr6:38818229-38819313	NA	0.986	0.986	NA	NA	NA	NA	NA	NA	NA	0.986	NA	NA	0.869	0.985	NA	NA	NA	NA	0.949	NA	0.986	0.965	NA
SE	Aimp2:chr5:143902703-143903190:143906548-143906755:143909700-143909847:-	chr5:143906548-143906755	NA	NA	NA	NA	NA	NA	NA	NA	NA	NA	NA	NA	NA	NA	0.954	NA	NA	NA	NA	NA	NA	NA	NA	NA
SE	Snap47:chr11:59438448-59438516:59442791-59442912:59449914-59449999:-	chr11:59442791-59442912	0.058	NA	NA	NA	NA	NA	NA	NA	NA	0.027	NA	NA	NA	NA	NA	NA	0.038	NA	NA	NA	NA	NA	NA	NA
SE	Otog:chr7:46306120-46306240:46307046-46307092:46309774-46309854:+	chr7:46307046-46307092	NA	NA	NA	NA	NA	NA	NA	NA	NA	NA	NA	NA	0.793	NA	NA	NA	NA	NA	NA	NA	NA	NA	NA	NA
SE	Enkd1:chr8:105704350-105704760:105706565-105706738:105707548-105707743:-	chr8:105706565-105706738	NA	NA	NA	0.895	NA	NA	NA	NA	NA	NA	NA	NA	NA	NA	NA	NA	NA	NA	NA	NA	NA	NA	NA	0.902
SE	Snd1:chr6:28795828-28795938:28874860-28875049:28880196-28880233:+	chr6:28874860-28875049	NA	NA	NA	NA	NA	NA	NA	NA	NA	NA	0.991	NA	NA	NA	NA	NA	NA	NA	NA	NA	NA	NA	NA	NA
SE	Rbfox2:chr15:77116920-77117067:77132716-77132941:77306363-77307004:-	chr15:77132716-77132941	NA	NA	NA	NA	NA	0.982	NA	NA	NA	NA	0.989	NA	NA	NA	NA	NA	NA	NA	NA	NA	NA	NA	0.99	NA
SE	Scrib:chr15:76048709-76048857:76048933-76049093:76049202-76049301:-	chr15:76048933-76049093	NA	NA	NA	0.989	NA	NA	NA	NA	NA	NA	NA	NA	NA	0.989	NA	NA	0.959	NA	NA	NA	NA	NA	NA	NA
A3SS	Vps8:chr16:21560199-21560240:21560197-21560240:21559333-21559423:+	chr16:21560197-21560199	NA	NA	NA	NA	NA	NA	NA	NA	NA	NA	NA	NA	NA	NA	0.945	NA	NA	NA	NA	NA	NA	NA	0.852	NA
SE	Rufy2:chr10:62993116-62993240:62993979-62994041:62994704-62994770:+	chr10:62993979-62994041	NA	NA	NA	NA	NA	NA	NA	0.975	NA	NA	NA	NA	NA	NA	NA	NA	NA	NA	NA	NA	NA	NA	NA	NA
SE	Crem:chr18:3276693-3276729:3287903-3288092:3325360-3325474:-	chr18:3287903-3288092	NA	NA	NA	NA	NA	NA	NA	NA	NA	NA	NA	NA	NA	NA	NA	NA	0.708	NA	NA	NA	NA	NA	NA	NA
SE	Pdlim5:chr3:142304704-142304722:142306283-142306298:142312122-142312214:-	chr3:142306283-142306298	0.476	NA	0.254	0.083	NA	0.645	NA	NA	NA	NA	0.154	NA	NA	NA	0.476	NA	0.185	NA	NA	0.312	0.732	NA	NA	NA
SE	Vps28:chr15:76623170-76623272:76623388-76623494:76624085-76624175:-	chr15:76623388-76623494	0.997	NA	NA	NA	NA	NA	0.993	NA	NA	NA	NA	NA	NA	NA	NA	NA	NA	NA	NA	NA	NA	NA	NA	NA
A5SS	Angel2:chr1:190940873-190941295:190940873-190941458:190942120-190942247:+	chr1:190941295-190941458	0.19	0.24	0.366	0.13	0.274	0.163	0.275	0.291	0.161	0.122	0.151	0.304	0.262	0.307	0.283	0.664	0.227	0.316	0.353	0.14	0.244	0.149	0.251	0.362
SE	Bdp1:chr13:100078658-100078799:100084140-100084195:100089352-100089447:-	chr13:100084140-100084195	NA	NA	0.826	NA	0.95	NA	NA	NA	NA	NA	NA	NA	NA	NA	NA	NA	NA	0.939	NA	NA	NA	NA	NA	NA
SE	Rad51d:chr11:82883882-82883964:82889668-82889810:82889969-82890031:-	chr11:82889668-82889810	NA	0.974	NA	NA	NA	NA	NA	NA	NA	NA	NA	0.928	NA	NA	NA	NA	NA	NA	NA	NA	NA	0.965	NA	NA
SE	Hmg20a:chr9:56482607-56482639:56487615-56487691:56488613-56488829:+	chr9:56487615-56487691	NA	NA	0.983	NA	NA	NA	NA	0.986	NA	NA	NA	NA	NA	NA	NA	NA	NA	NA	NA	NA	NA	0.983	NA	NA
SE	Ppfibp1:chr6:146998166-146998281:147000940-147001002:147002193-147002269:+	chr6:147000940-147001002	0.987	NA	NA	NA	NA	NA	NA	NA	NA	NA	NA	NA	NA	NA	NA	NA	NA	NA	NA	NA	NA	NA	NA	NA
SE	Cdkl3:chr11:52035946-52036020:52040560-52040620:52084370-52084490:+	chr11:52040560-52040620	NA	NA	NA	NA	0.74	NA	NA	NA	NA	NA	NA	NA	NA	NA	NA	NA	NA	NA	NA	0.517	NA	NA	NA	NA
SE	Dus4l:chr12:31642763-31642886:31646620-31646738:31648765-31648887:-	chr12:31646620-31646738	NA	NA	NA	NA	NA	0.841	0.951	NA	NA	NA	NA	NA	NA	NA	NA	NA	NA	NA	NA	NA	NA	NA	0.854	NA
RI	Htra2:chr6:83052697-83052803:83052697-83053070:83053037-83053070:-	chr6:83052803-83053037	0.219	0.156	0.167	0.356	0.238	0.245	0.292	0.203	0.16	0.193	0.217	0.253	0.165	0.191	0.132	0.179	0.154	0.312	0.124	0.167	0.115	0.138	0.238	0.164
RI	Yipf3:chr17:46251113-46251227:46251113-46251487:46251363-46251487:+	chr17:46251227-46251363	0.13	0.095	0.073	0.072	0.126	0.11	0.104	0.109	0.106	0.082	0.122	0.104	0.06	0.129	0.087	0.061	0.076	0.09	0.104	0.084	0.135	0.073	0.089	0.088
SE	Pmpcb:chr5:21742757-21742956:21743378-21743458:21745977-21746090:+	chr5:21743378-21743458	0.993	NA	NA	NA	NA	NA	NA	NA	NA	NA	NA	NA	NA	NA	NA	NA	NA	NA	NA	NA	NA	NA	NA	NA
SE	Cnot2:chr10:116501191-116501317:116517316-116517383:116549032-116549163:-	chr10:116517316-116517383	NA	NA	NA	NA	NA	NA	NA	NA	NA	NA	NA	NA	NA	NA	NA	NA	0.791	NA	NA	NA	NA	NA	NA	NA
SE	Fbxw11:chr11:32708187-32708250:32711771-32711997:32720471-32720574:+	chr11:32711771-32711997	0.988	NA	NA	NA	NA	NA	NA	NA	NA	NA	NA	NA	NA	NA	NA	NA	NA	NA	NA	NA	NA	NA	NA	NA
SE	Atp13a3:chr16:30361419-30361490:30361813-30361984:30362575-30362749:-	chr16:30361813-30361984	NA	NA	NA	NA	NA	NA	NA	NA	NA	NA	NA	NA	NA	NA	NA	0.973	NA	NA	NA	NA	NA	NA	0.996	0.987
SE	4430402I18Rik:chr19:28948618-28948743:28954089-28954131:28959679-28959728:-	chr19:28954089-28954131	NA	0.238	NA	0.609	0.539	NA	0.438	0.757	NA	NA	NA	NA	0.438	NA	NA	NA	NA	NA	NA	0.281	0.163	NA	NA	NA
SE	Cabin1:chr10:75694714-75695046:75699912-75700095:75713539-75713631:-	chr10:75699912-75700095	NA	NA	NA	0.938	NA	NA	NA	NA	NA	NA	NA	NA	NA	NA	NA	NA	NA	NA	NA	NA	NA	NA	NA	NA
RI	Cdk18:chr1:132116446-132116489:132116446-132116701:132116595-132116701:-	chr1:132116489-132116595	NA	0.06	0.149	0.114	NA	NA	0.455	0.226	NA	0.04	0.061	0.493	0.1	NA	0.073	0.173	0.048	0.168	0.031	0.105	0.117	0.115	0.074	0.142
SE	2610507B11Rik:chr11:78262698-78262828:78263553-78263639:78263911-78264032:+	chr11:78263553-78263639	0.979	NA	NA	NA	NA	NA	NA	NA	NA	NA	NA	NA	NA	NA	NA	NA	NA	NA	NA	NA	NA	NA	NA	NA
SE	Zfp521:chr18:13843781-13847134:13938961-13939141:13972500-13972648:-	chr18:13938961-13939141	NA	NA	NA	NA	NA	0.978	NA	NA	NA	NA	NA	NA	NA	NA	NA	NA	NA	NA	NA	NA	NA	NA	NA	NA
SE	Gapvd1:chr2:34720567-34720728:34722937-34723018:34725042-34725232:-	chr2:34722937-34723018	0.063	0.039	0.131	0.156	0.034	0.016	0.085	0.027	0.12	0.066	0.075	0.041	0.07	0.04	0.15	0.09	0.116	0.044	0.076	0.211	0.025	0.11	0.032	0.054
SE	Mlh1:chr9:111256092-111256135:111257399-111257491:111258488-111258561:-	chr9:111257399-111257491	NA	NA	NA	NA	0.975	NA	NA	NA	NA	NA	NA	NA	NA	NA	NA	NA	NA	NA	NA	NA	NA	NA	NA	NA
SE	D8Ertd738e:chr8:84246237-84246693:84249473-84249529:84249615-84249719:-	chr8:84249473-84249529	0.997	0.996	0.996	NA	NA	NA	NA	NA	NA	NA	NA	NA	NA	NA	NA	NA	0.998	NA	NA	NA	NA	NA	NA	0.996
SE	Ctdspl2:chr2:121978811-121979041:121981151-121981364:121986948-121987027:+	chr2:121981151-121981364	0.938	0.976	NA	NA	NA	0.977	NA	NA	NA	NA	NA	NA	NA	NA	NA	NA	NA	NA	NA	NA	0.962	0.967	0.984	0.973
SE	Spice1:chr16:44382018-44382202:44384670-44384773:44385618-44385706:+	chr16:44384670-44384773	NA	NA	NA	NA	NA	0.874	0.95	0.935	NA	NA	0.97	NA	NA	NA	0.819	NA	NA	0.959	NA	NA	NA	NA	0.953	NA
SE	Ift81:chr5:122560658-122560745:122567260-122567350:122568910-122569039:-	chr5:122567260-122567350	NA	NA	NA	NA	NA	NA	NA	NA	NA	NA	NA	NA	0.985	0.979	NA	NA	0.946	NA	NA	NA	NA	NA	0.977	0.943
SE	Man2b2:chr5:36813731-36813978:36814328-36814520:36815318-36815593:-	chr5:36814328-36814520	NA	NA	NA	NA	NA	NA	NA	NA	NA	NA	NA	NA	0.992	NA	NA	NA	NA	NA	NA	NA	0.995	NA	NA	NA
SE	Bahcc1:chr11:120274871-120275202:120276057-120276873:120279054-120279254:+	chr11:120276057-120276873	NA	NA	NA	NA	NA	NA	NA	NA	NA	NA	NA	NA	NA	NA	NA	NA	NA	NA	NA	NA	NA	NA	NA	0.876
SE	Gtpbp8:chr16:44742503-44742603:44743737-44743868:44745394-44745493:-	chr16:44743737-44743868	NA	NA	NA	NA	NA	NA	NA	0.965	NA	NA	NA	NA	0.921	NA	0.956	NA	NA	NA	NA	NA	NA	NA	NA	NA
SE	Trappc10:chr10:78220188-78220384:78222663-78222860:78228778-78228914:-	chr10:78222663-78222860	NA	0.973	0.947	0.968	NA	NA	NA	NA	NA	NA	NA	0.956	0.914	NA	NA	NA	0.974	NA	NA	NA	0.987	0.968	NA	NA
SE	BC031181:chr18:75005867-75006014:75008650-75008826:75009277-75009593:+	chr18:75008650-75008826	0.993	NA	NA	NA	NA	NA	NA	NA	NA	NA	NA	NA	NA	NA	NA	NA	NA	NA	NA	NA	NA	NA	NA	NA
SE	Rsad2:chr12:26450545-26450775:26451972-26452407:26454017-26454179:-	chr12:26451972-26452407	NA	NA	NA	NA	NA	NA	NA	NA	NA	NA	NA	NA	NA	NA	NA	NA	NA	0.049	NA	NA	NA	NA	NA	NA
SE	Ttl:chr2:129081973-129082243:129088993-129089137:129092940-129096283:+	chr2:129088993-129089137	NA	NA	NA	NA	NA	NA	NA	NA	0.967	NA	NA	NA	NA	NA	NA	NA	0.971	NA	NA	NA	NA	NA	NA	NA
SE	Map3k10:chr7:27664397-27664573:27664949-27665098:27668348-27668529:-	chr7:27664949-27665098	0.923	0.976	0.818	0.75	0.913	0.91	0.859	0.82	0.955	0.875	0.967	0.984	NA	0.815	0.905	NA	0.984	0.773	0.91	0.805	0.9	0.871	0.869	0.851
SE	Spg20:chr3:55121599-55121797:55124754-55124925:55126533-55126654:+	chr3:55124754-55124925	0.725	0.652	0.752	0.716	0.727	0.731	0.688	0.697	0.683	0.6	0.681	0.665	0.643	0.66	0.714	0.705	0.712	0.785	0.57	0.719	0.745	0.666	0.715	0.623
SE	Mtap:chr4:89137121-89137524:89148188-89148275:89152008-89152067:+	chr4:89148188-89148275	NA	NA	NA	NA	NA	NA	NA	NA	NA	NA	NA	NA	NA	NA	NA	NA	0.998	NA	0.998	NA	NA	NA	NA	NA
SE	Npas3:chr12:53501033-53501278:53501389-53501440:53640459-53640536:+	chr12:53501389-53501440	NA	NA	0.157	NA	NA	NA	NA	NA	NA	NA	NA	NA	NA	NA	NA	NA	NA	NA	NA	NA	NA	0.199	NA	NA
SE	Fap:chr2:62553782-62553857:62554744-62554839:62573438-62573523:-	chr2:62554744-62554839	NA	NA	NA	NA	NA	NA	NA	NA	NA	NA	NA	NA	NA	NA	NA	NA	0.989	NA	NA	NA	NA	NA	NA	0.968
SE	Ppfibp1:chr6:147029560-147029737:147030082-147030148:147030313-147032023:+	chr6:147030082-147030148	NA	NA	NA	NA	NA	NA	NA	NA	NA	NA	NA	NA	NA	0.997	NA	NA	NA	NA	NA	NA	NA	NA	NA	NA
SE	Arhgef11:chr3:87618760-87618792:87681859-87681892:87683485-87683577:+	chr3:87681859-87681892	0.03	0.052	0.013	NA	NA	0.011	0.016	0.017	NA	NA	NA	0.028	0.016	NA	0.015	NA	0.017	NA	0.052	NA	0.029	NA	NA	0.022
SE	Mbp:chr18:82575171-82575207:82575534-82575633:82584111-82584156:+	chr18:82575534-82575633	NA	NA	NA	NA	NA	NA	NA	NA	NA	NA	NA	NA	NA	NA	NA	NA	NA	NA	NA	NA	NA	NA	0.375	NA
SE	Ubac2:chr14:121908210-121908320:121973608-121973732:121994224-121994308:+	chr14:121973608-121973732	0.984	0.975	NA	NA	NA	0.985	NA	NA	NA	NA	0.979	NA	NA	NA	0.965	NA	0.948	NA	NA	NA	0.93	NA	0.953	NA
SE	N4bp2l2:chr5:150635971-150643315:150647459-150647548:150650614-150650739:-	chr5:150647459-150647548	0.966	0.952	NA	0.935	0.899	0.898	0.862	0.901	0.954	0.979	0.839	0.777	0.974	NA	NA	NA	0.925	0.814	NA	0.941	0.924	0.971	0.951	0.966
A3SS	Dmtf1:chr5:9130367-9130652:9130367-9130693:9131275-9131308:-	chr5:9130652-9130693	NA	0.282	0.44	0.164	0.101	0.702	NA	NA	NA	NA	NA	NA	NA	NA	NA	NA	0.116	0.611	0.44	NA	NA	NA	NA	0.101
SE	Ocrl:chrX:47941108-47941218:47943505-47943641:47947002-47947113:+	chrX:47943505-47943641	NA	NA	NA	NA	NA	NA	NA	0.901	0.93	NA	NA	NA	NA	NA	NA	NA	NA	NA	NA	0.962	NA	NA	NA	NA
SE	Hivep2:chr10:13966074-13966220:14066582-14066684:14117518-14117600:+	chr10:14066582-14066684	NA	NA	NA	0.806	NA	NA	NA	NA	NA	NA	NA	NA	NA	NA	NA	NA	NA	NA	NA	NA	NA	NA	NA	NA
SE	Pfdn6:chr17:33939747-33939818:33940023-33940165:33940296-33940325:-	chr17:33940023-33940165	NA	NA	0.991	NA	NA	NA	NA	NA	NA	NA	NA	NA	NA	NA	NA	NA	NA	NA	NA	0.986	NA	NA	NA	NA
SE	Col11a1:chr3:114138577-114138622:114138743-114138797:114138920-114138965:+	chr3:114138743-114138797	NA	NA	NA	NA	0.99	NA	NA	NA	NA	NA	NA	NA	NA	NA	NA	NA	NA	NA	NA	NA	NA	NA	NA	NA
SE	Fam20b:chr1:156705667-156706167:156716887-156716980:156718865-156719072:-	chr1:156716887-156716980	0.693	0.757	0.588	0.565	0.581	0.792	0.646	0.578	0.478	0.771	0.775	0.779	0.636	0.635	0.613	0.263	0.547	0.732	0.543	0.696	0.458	0.479	0.634	0.611
SE	E130307A14Rik:chr10:39640379-39640511:39645555-39645808:39731737-39731982:-	chr10:39645555-39645808	0.481	NA	NA	NA	NA	0.701	0.824	0.585	0.755	NA	0.835	NA	NA	NA	NA	NA	NA	NA	NA	NA	0.759	NA	NA	NA
A3SS	Tmem104:chr11:115205477-115205583:115205474-115205583:115205061-115205161:+	chr11:115205474-115205477	NA	NA	0.889	NA	0.867	0.878	NA	NA	NA	0.92	NA	0.76	NA	0.97	NA	NA	NA	NA	NA	0.877	0.961	0.898	NA	NA
SE	Mtf2:chr5:108069161-108069363:108078865-108078974:108080824-108081023:+	chr5:108078865-108078974	0.126	NA	NA	NA	NA	NA	NA	NA	NA	NA	NA	NA	NA	NA	NA	NA	NA	NA	NA	NA	0.698	NA	NA	0.366
SE	Msi2:chr11:88347052-88347125:88348783-88348992:88366784-88366847:-	chr11:88348783-88348992	NA	NA	NA	NA	NA	NA	NA	0.96	NA	NA	NA	NA	0.944	0.94	0.97	NA	NA	NA	NA	NA	NA	NA	NA	NA
SE	Lpcat1:chr13:73494801-73494914:73496179-73496240:73499298-73499357:+	chr13:73496179-73496240	0.899	NA	NA	NA	NA	NA	NA	NA	NA	NA	0.912	NA	NA	NA	NA	NA	NA	NA	NA	0.949	NA	NA	NA	0.974
SE	Arap1:chr7:101378368-101378532:101384861-101385040:101385551-101385593:+	chr7:101384861-101385040	NA	NA	NA	NA	0.954	0.939	0.963	0.714	NA	0.959	NA	0.854	NA	0.723	NA	NA	NA	0.917	NA	NA	NA	NA	0.97	NA
A5SS	Dennd4b:chr3:90270054-90270121:90270054-90270128:90270212-90270271:+	chr3:90270121-90270128	NA	0.128	NA	0.183	0.113	0.219	NA	NA	0.12	0.035	0.023	0.068	NA	0.04	0.152	NA	0.12	0.134	NA	0.175	NA	0.12	0.032	0.254
A5SS	Usf3:chr16:44198903-44199021:44198903-44199167:44200613-44200678:+	chr16:44199021-44199167	NA	NA	NA	0.139	0.126	0.112	NA	0.059	0.336	NA	NA	0.202	0.252	NA	NA	NA	NA	0.224	0.132	0.135	0.457	NA	0.044	0.112
SE	Col23a1:chr11:51577073-51577160:51578582-51578660:51579574-51579613:+	chr11:51578582-51578660	0.028	0.247	0.291	0.008	0.031	0.043	0.089	NA	0.01	0.233	0.058	0.021	0.088	0.087	0.922	NA	0.123	0.025	NA	0.023	0.022	0.099	NA	0.043
SE	Klhl23:chr2:69823786-69825000:69828845-69828998:69833674-69836651:+	chr2:69828845-69828998	NA	NA	NA	NA	0.895	NA	NA	NA	NA	NA	NA	NA	NA	NA	NA	NA	NA	NA	NA	NA	NA	NA	NA	NA
A3SS	Zim1:chr7:6688623-6688689:6688623-6688811:6689487-6689564:-	chr7:6688689-6688811	0.712	NA	0.673	0.452	NA	NA	NA	NA	0.647	NA	0.903	NA	NA	NA	0.63	NA	0.704	NA	0.638	0.452	0.767	0.478	NA	0.382
SE	Tle2:chr10:81588808-81588959:81589419-81589496:81590224-81590352:+	chr10:81589419-81589496	NA	NA	NA	NA	NA	NA	NA	NA	NA	0.985	NA	NA	NA	0.976	0.973	NA	NA	0.991	NA	0.993	NA	NA	NA	NA
SE	Atg4b:chr1:93775627-93775700:93778284-93778364:93780717-93780911:+	chr1:93778284-93778364	NA	0.992	NA	0.991	NA	NA	NA	NA	NA	NA	NA	NA	NA	NA	NA	NA	0.98	NA	NA	NA	NA	NA	NA	NA
SE	Atg13:chr2:91678726-91678855:91679312-91679429:91680342-91680457:-	chr2:91679312-91679429	NA	NA	NA	NA	NA	NA	NA	NA	NA	NA	NA	NA	NA	NA	NA	NA	NA	NA	0.867	NA	NA	NA	NA	NA
SE	Samd4b:chr7:28407468-28407578:28407935-28408175:28413871-28414342:-	chr7:28407935-28408175	NA	NA	NA	NA	0.987	NA	NA	NA	0.989	NA	0.969	0.973	0.98	NA	NA	NA	NA	0.99	NA	NA	NA	NA	0.983	NA
SE	Acads:chr5:115112783-115113213:115117564-115117728:115119224-115119275:-	chr5:115117564-115117728	NA	0.983	0.979	0.985	0.985	0.957	0.978	0.969	0.987	0.937	0.976	0.982	NA	NA	0.984	NA	0.979	0.98	NA	0.987	0.989	0.989	0.974	0.989
A5SS	Tpp1:chr7:105752170-105752196:105751981-105752196:105751589-105751729:-	chr7:105751981-105752170	NA	NA	NA	NA	NA	NA	NA	NA	NA	NA	NA	NA	NA	NA	NA	0.909	NA	NA	NA	NA	NA	NA	NA	NA
SE	4833420G17Rik:chr13:119462771-119463119:119464564-119464690:119466073-119466304:+	chr13:119464564-119464690	0.176	0.236	0.153	0.24	0.144	0.23	0.156	0.311	0.277	0.075	0.1	0.18	0.21	0.153	0.077	NA	0.198	0.302	0.023	0.2	0.162	0.213	0.209	0.075
SE	Commd4:chr9:57156515-57156555:57156749-57156758:57157066-57157139:-	chr9:57156749-57156758	NA	NA	0.654	NA	NA	NA	0.485	NA	NA	0.654	NA	NA	NA	0.739	NA	NA	0.485	NA	NA	0.414	NA	NA	NA	NA
SE	Serpini1:chr3:75613079-75613347:75614453-75614684:75616567-75616709:+	chr3:75614453-75614684	NA	0.989	NA	NA	NA	NA	NA	NA	NA	NA	NA	NA	NA	NA	NA	NA	NA	NA	NA	NA	NA	NA	NA	NA
A3SS	Zfp827:chr8:79178907-79179079:79178889-79179079:79175832-79175970:+	chr8:79178889-79178907	0.22	0.273	0.041	0.342	NA	0.078	0.05	0.136	0.472	0.22	0.373	0.354	0.329	0.251	0.289	NA	0.401	0.05	0.106	0.334	0.321	0.255	0.294	0.151
SE	Kif18b:chr11:102916485-102916515:102924467-102924713:102924982-102925088:-	chr11:102924467-102924713	NA	NA	0.04	NA	NA	0.569	NA	NA	0.32	NA	NA	NA	NA	NA	NA	NA	NA	0.054	NA	NA	NA	NA	NA	NA
SE	Rtn4rl2:chr2:84871923-84872695:84880387-84880869:84886661-84886692:-	chr2:84880387-84880869	NA	NA	NA	NA	NA	NA	NA	NA	NA	NA	NA	NA	NA	NA	NA	NA	NA	NA	NA	NA	NA	0.978	NA	NA
SE	Meis1:chr11:18986773-18988379:19011241-19011388:19012809-19012860:-	chr11:19011241-19011388	0.972	0.954	0.938	0.962	0.942	0.98	0.981	0.944	0.97	NA	0.979	NA	0.994	NA	0.834	NA	0.984	0.992	0.935	0.962	0.967	0.935	0.965	0.951
SE	Jtb:chr3:90232046-90232511:90233922-90234002:90235296-90235544:+	chr3:90233922-90234002	NA	NA	NA	NA	NA	NA	NA	NA	NA	NA	NA	NA	NA	NA	NA	NA	NA	NA	NA	NA	NA	NA	0.914	NA
SE	Pcgf3:chr5:108473788-108473906:108474578-108474643:108475109-108475206:+	chr5:108474578-108474643	NA	0.008	0.013	NA	NA	NA	NA	NA	NA	0.009	NA	NA	0.017	NA	NA	NA	0.008	NA	0.023	NA	NA	0.023	NA	NA
SE	Abi3bp:chr16:56615564-56615612:56631861-56631945:56642488-56642560:+	chr16:56631861-56631945	NA	NA	NA	NA	NA	0.138	NA	NA	NA	NA	NA	NA	NA	NA	NA	NA	NA	NA	NA	NA	NA	NA	NA	NA
SE	Tjp1:chr7:65312554-65313424:65314658-65315009:65317986-65318087:-	chr7:65314658-65315009	0.988	NA	NA	NA	NA	0.983	NA	NA	NA	NA	0.983	NA	0.99	0.983	NA	NA	NA	NA	NA	NA	NA	NA	NA	NA
SE	Usf2:chr7:30955289-30955440:30955799-30956000:30956148-30956239:-	chr7:30955799-30956000	0.981	0.967	0.947	0.981	0.978	0.983	0.951	0.978	0.909	0.972	0.944	0.978	0.967	0.984	0.95	NA	0.945	0.96	0.921	0.985	0.973	0.956	0.934	0.984
SE	Atp2b1:chr10:99010673-99010780:99014458-99014650:99014883-99015097:+	chr10:99014458-99014650	NA	NA	0.978	0.97	NA	NA	NA	NA	0.989	NA	NA	NA	NA	0.989	0.973	NA	NA	NA	NA	NA	NA	NA	NA	0.985
SE	Fxyd1:chr7:31053892-31053925:31054305-31054434:31055550-31055656:-	chr7:31054305-31054434	0.969	NA	NA	NA	0.988	NA	NA	0.991	NA	NA	NA	NA	NA	NA	NA	NA	NA	NA	NA	NA	NA	NA	NA	NA
SE	Syt9:chr7:107370789-107371147:107425046-107425398:107436274-107436821:+	chr7:107425046-107425398	NA	NA	NA	NA	NA	NA	NA	NA	0.659	NA	NA	NA	NA	NA	NA	NA	NA	NA	NA	NA	NA	NA	NA	NA
A5SS	Med17:chr9:15271610-15271741:15271555-15271741:15270342-15270527:-	chr9:15271555-15271610	0.08	0.041	0.018	0.015	0.109	0.068	0.098	0.029	0.183	0.121	0.141	0.071	0.094	0.02	0.062	0.081	0.068	0.059	0.142	0.065	0.015	0.03	0.068	0.034
SE	Ccnd1:chr7:144937293-144937453:144937886-144938102:144939495-144939869:-	chr7:144937886-144938102	0.995	NA	NA	NA	0.998	NA	NA	NA	NA	NA	NA	NA	NA	NA	NA	NA	NA	0.995	NA	NA	0.997	0.998	NA	NA
SE	Tbcd:chr11:121573795-121573876:121575285-121575359:121576125-121576182:+	chr11:121575285-121575359	NA	0.99	NA	NA	NA	NA	0.992	NA	NA	NA	NA	NA	NA	NA	NA	NA	NA	NA	NA	NA	NA	NA	NA	NA
SE	Psmd8:chr7:29178918-29179021:29179142-29179215:29180276-29180481:-	chr7:29179142-29179215	0.998	0.997	0.997	0.998	0.998	NA	NA	NA	0.995	NA	NA	NA	NA	NA	NA	NA	NA	NA	NA	NA	0.997	NA	NA	NA
SE	Cdk4:chr10:127063533-127063759:127064219-127064453:127064584-127064630:+	chr10:127064219-127064453	0.976	0.988	0.979	0.992	0.98	0.996	0.968	0.99	0.986	0.989	0.987	NA	0.955	0.989	0.977	NA	0.986	0.997	0.998	0.967	0.984	0.997	0.993	NA
SE	Dcun1d1:chr3:35897792-35897875:35919000-35919169:35932784-35932815:-	chr3:35919000-35919169	NA	NA	NA	NA	NA	NA	NA	NA	NA	NA	NA	NA	NA	NA	NA	NA	NA	NA	0.584	NA	NA	NA	NA	0.888
SE	Ccdc90b:chr7:92568471-92568575:92572538-92572640:92574621-92574663:+	chr7:92572538-92572640	0.961	0.967	0.906	0.99	0.935	0.944	0.921	0.911	0.943	0.959	0.976	0.896	0.933	0.881	0.894	NA	0.884	0.938	NA	0.992	0.973	0.907	0.899	0.849
A5SS	Pgm2:chr5:64103713-64103864:64103713-64103907:64106607-64106705:+	chr5:64103864-64103907	NA	NA	NA	NA	NA	NA	NA	NA	0.957	NA	NA	NA	NA	NA	NA	NA	NA	NA	NA	NA	NA	NA	NA	NA
SE	Msrb3:chr10:120825107-120825136:120871034-120871151:120898832-120899101:-	chr10:120871034-120871151	NA	NA	NA	NA	NA	NA	NA	NA	0.961	NA	NA	NA	NA	0.947	NA	NA	0.972	NA	0.853	NA	NA	NA	NA	NA
SE	Pecr:chr1:72261951-72262063:72267406-72267517:72270276-72270373:-	chr1:72267406-72267517	NA	NA	NA	NA	NA	NA	NA	NA	NA	NA	NA	NA	NA	NA	NA	NA	NA	NA	NA	0.917	NA	NA	NA	NA
SE	Vps35:chr8:85260391-85261309:85261994-85262138:85263310-85263550:-	chr8:85261994-85262138	NA	NA	NA	NA	NA	NA	NA	NA	NA	NA	NA	NA	NA	NA	NA	NA	NA	0.991	NA	NA	NA	NA	NA	NA
SE	Cyb5rl:chr4:107070869-107071018:107077675-107077780:107080890-107081094:+	chr4:107077675-107077780	NA	NA	NA	NA	NA	NA	NA	NA	NA	NA	NA	NA	NA	NA	NA	NA	NA	NA	NA	NA	NA	0.81	NA	NA
SE	Ubap2:chr4:41211704-41211894:41216565-41216633:41218310-41218363:-	chr4:41216565-41216633	NA	NA	NA	NA	NA	NA	NA	0.984	NA	NA	NA	NA	NA	NA	NA	NA	NA	NA	0.98	NA	NA	NA	0.993	NA
SE	Prpf39:chr12:65043231-65043357:65044005-65044124:65048112-65048280:+	chr12:65044005-65044124	NA	NA	NA	NA	NA	NA	0.978	NA	NA	NA	NA	NA	NA	NA	NA	NA	NA	NA	NA	NA	NA	NA	NA	NA
SE	Helz:chr11:107626534-107626714:107627352-107627454:107632171-107632350:+	chr11:107627352-107627454	NA	NA	NA	NA	NA	NA	NA	NA	NA	NA	NA	NA	NA	NA	NA	NA	NA	NA	NA	NA	NA	0.968	NA	NA
A3SS	Mia2:chr12:59170261-59170318:59170257-59170318:59168933-59169035:+	chr12:59170257-59170261	NA	NA	NA	NA	0.978	NA	NA	NA	NA	NA	NA	NA	NA	NA	NA	NA	NA	NA	NA	NA	NA	NA	NA	NA
SE	Rab6a:chr7:100631741-100631853:100634644-100634738:100636694-100636761:+	chr7:100634644-100634738	NA	NA	NA	NA	0.979	NA	NA	0.995	NA	0.996	NA	NA	NA	NA	NA	NA	NA	NA	NA	NA	NA	NA	0.991	NA
SE	Slc25a26:chr6:94535720-94535768:94576333-94576378:94592411-94592481:+	chr6:94576333-94576378	0.577	0.754	0.772	0.416	0.754	0.92	0.754	NA	0.606	0.815	0.754	0.204	0.754	0.606	0.793	NA	0.58	0.898	NA	0.606	0.628	0.672	NA	0.668
SE	Fbxo6:chr4:148147294-148147421:148149378-148149666:148152012-148152135:-	chr4:148149378-148149666	NA	NA	NA	NA	NA	0.982	NA	NA	NA	NA	NA	NA	NA	NA	NA	NA	NA	NA	NA	NA	NA	NA	NA	NA
RI	Rusc2:chr4:43426227-43426365:43426227-43427088:43426447-43427088:+	chr4:43426365-43426447	0.326	0.304	0.333	0.354	0.283	0.299	0.324	0.483	0.473	0.375	0.435	0.411	0.377	0.41	0.344	0.163	0.356	0.513	0.375	0.332	0.397	0.336	0.489	0.389
SE	Flt3l:chr7:45132227-45132412:45133422-45133501:45133881-45133909:-	chr7:45133422-45133501	NA	NA	NA	0.033	NA	NA	0.042	0.179	0.121	NA	NA	0.03	NA	0.135	NA	NA	NA	0.164	NA	NA	NA	NA	NA	NA
SE	Dctn4:chr18:60526184-60526365:60534592-60534663:60538263-60538442:+	chr18:60534592-60534663	NA	0.994	NA	NA	NA	NA	NA	NA	NA	NA	NA	NA	NA	NA	NA	NA	NA	NA	NA	NA	NA	NA	NA	NA
SE	Eml2:chr7:19196196-19196351:19196492-19196618:19200499-19200631:+	chr7:19196492-19196618	NA	NA	NA	0.979	NA	NA	NA	NA	NA	NA	NA	NA	NA	NA	NA	NA	NA	NA	NA	NA	NA	NA	NA	NA
SE	Ssh1:chr5:113966179-113966301:113966708-113966773:113970370-113970474:-	chr5:113966708-113966773	NA	NA	NA	NA	NA	NA	NA	NA	NA	0.936	NA	NA	NA	NA	NA	NA	NA	NA	NA	NA	NA	NA	NA	NA
SE	Poldip3:chr15:83135293-83135389:83137467-83137554:83138131-83138522:-	chr15:83137467-83137554	0.928	0.954	0.929	0.896	0.862	0.972	0.806	NA	0.954	0.948	0.938	0.926	0.931	0.945	0.897	NA	0.973	0.916	0.92	0.922	0.931	0.984	0.994	0.928
A3SS	Arv1:chr8:124728368-124728482:124728328-124728482:124725255-124725375:+	chr8:124728328-124728368	0.738	0.759	NA	0.42	0.334	0.727	0.42	0.525	0.612	0.798	0.441	0.654	0.759	0.558	0.734	NA	0.612	0.678	0.734	0.417	0.378	0.58	0.663	0.512
A3SS	Rufy2:chr10:63004656-63004776:63002945-63004776:63002182-63002280:+	chr10:63002945-63004656	0.037	0.088	0.026	0.043	0.067	0.059	0.016	0.079	0.048	0.044	0.059	0.097	0.06	0.027	0.017	0.074	0.029	0.098	0.044	0.033	0.068	0.018	0.05	0.006
SE	Pick1:chr15:79239583-79239712:79241226-79241293:79242967-79243057:+	chr15:79241226-79241293	NA	NA	NA	NA	0.974	NA	NA	NA	NA	NA	NA	NA	0.633	NA	NA	NA	NA	0.897	NA	NA	0.954	NA	0.894	NA
SE	Ubac1:chr2:25998542-25999067:26005325-26005464:26006526-26006613:-	chr2:26005325-26005464	0.967	0.936	0.917	0.935	0.93	0.952	0.916	0.93	0.929	0.963	0.915	0.94	0.925	0.895	0.886	NA	0.953	0.916	0.945	0.947	0.972	0.874	0.907	0.924
SE	Ager:chr17:34599995-34600137:34600350-34600377:34600494-34600621:+	chr17:34600350-34600377	NA	0.377	0.297	0.629	0.346	NA	NA	NA	NA	0.22	NA	NA	NA	0.297	NA	NA	NA	NA	0.458	NA	NA	0.388	NA	NA
SE	Syncrip:chr9:88476788-88476965:88477099-88477187:88479570-88479678:-	chr9:88477099-88477187	NA	NA	NA	0.959	NA	NA	NA	NA	NA	NA	0.976	NA	NA	0.982	NA	NA	NA	NA	0.834	NA	NA	NA	NA	NA
SE	Cacna1b:chr2:24650426-24650628:24651080-24651218:24657290-24657397:-	chr2:24651080-24651218	NA	NA	NA	NA	NA	NA	NA	NA	NA	NA	NA	NA	NA	NA	NA	NA	NA	NA	NA	NA	0.509	NA	NA	NA
SE	Gtf2ird1:chr5:134410953-134411109:134415134-134415276:134417052-134417181:-	chr5:134415134-134415276	NA	NA	NA	NA	NA	NA	NA	NA	NA	NA	NA	NA	NA	NA	NA	NA	NA	NA	NA	NA	NA	0.989	NA	NA
SE	Eefsec:chr6:88355482-88355647:88358545-88358642:88446205-88446484:-	chr6:88358545-88358642	NA	0.966	0.948	NA	NA	NA	NA	NA	NA	0.92	NA	NA	NA	NA	NA	NA	0.879	0.858	NA	NA	NA	NA	NA	0.883
SE	Nsd2:chr5:33820724-33820877:33821658-33821728:33843111-33843737:+	chr5:33821658-33821728	0.63	0.405	0.35	0.902	0.718	0.496	0.826	0.739	0.882	0.312	NA	0.49	0.338	0.519	0.283	NA	0.564	0.362	0.358	0.622	0.286	0.486	0.449	0.683
SE	Tmem18:chr12:30585469-30585590:30587199-30587254:30588473-30588567:+	chr12:30587199-30587254	NA	NA	NA	NA	NA	NA	NA	NA	NA	NA	0.987	NA	NA	NA	NA	NA	NA	NA	NA	NA	NA	NA	NA	NA
SE	Thada:chr17:84441660-84441812:84443817-84444509:84446504-84446725:-	chr17:84443817-84444509	NA	NA	NA	0.926	NA	0.95	NA	NA	NA	NA	NA	NA	NA	NA	NA	NA	NA	NA	NA	NA	NA	0.947	NA	NA
SE	Prpf40b:chr15:99304424-99304490:99305165-99305193:99305407-99305433:+	chr15:99305165-99305193	0.876	0.975	0.949	0.877	0.938	0.867	0.913	0.849	0.92	0.931	0.803	0.875	NA	0.983	0.986	NA	0.981	0.912	0.922	0.778	0.822	0.988	0.961	NA
SE	Atp6v0d1:chr8:105529173-105529253:105539320-105539492:105565782-105566047:-	chr8:105539320-105539492	NA	NA	NA	0.988	NA	NA	NA	NA	NA	NA	NA	NA	NA	NA	NA	NA	NA	NA	NA	NA	NA	NA	NA	NA
SE	Ccdc141:chr2:77059539-77059681:77074835-77075008:77108362-77108479:-	chr2:77074835-77075008	NA	NA	NA	NA	NA	NA	NA	NA	NA	NA	NA	NA	NA	NA	0.917	NA	NA	NA	NA	NA	NA	NA	NA	NA
SE	Etv4:chr11:101784229-101784323:101784516-101784627:101785107-101785260:-	chr11:101784516-101784627	NA	NA	0.978	NA	NA	NA	NA	NA	NA	NA	NA	NA	NA	NA	NA	NA	NA	NA	0.878	NA	NA	NA	NA	NA
RI	Slc7a4:chr16:17574951-17575001:17574951-17575965:17575616-17575965:-	chr16:17575001-17575616	NA	NA	NA	NA	NA	NA	NA	NA	NA	NA	NA	NA	NA	NA	NA	NA	0.649	NA	NA	NA	NA	NA	NA	NA
SE	Gnas:chr2:174334211-174334284:174341652-174341707:174341809-174341929:+	chr2:174341652-174341707	0.996	NA	0.999	NA	NA	NA	NA	NA	NA	NA	NA	NA	NA	NA	NA	NA	NA	NA	NA	NA	NA	NA	NA	NA
SE	Mllt1:chr17:56892610-56894590:56894666-56894738:56894830-56894902:-	chr17:56894666-56894738	NA	NA	NA	NA	NA	NA	NA	NA	NA	NA	NA	NA	NA	NA	NA	NA	0.981	NA	NA	NA	NA	NA	NA	NA
SE	Cnot1:chr8:95735685-95735828:95736253-95736393:95739807-95739927:-	chr8:95736253-95736393	NA	NA	NA	NA	NA	NA	NA	NA	NA	NA	0.973	NA	NA	NA	NA	NA	NA	NA	NA	NA	NA	NA	NA	NA
SE	Elmod3:chr6:72594739-72595020:72596435-72596466:72598321-72598342:-	chr6:72596435-72596466	0.525	0.713	0.525	0.216	0.398	0.683	0.663	0.525	0.713	0.453	0.713	0.383	NA	0.42	0.216	NA	0.332	0.639	NA	0.623	0.453	0.453	0.332	0.537
SE	Rai1:chr11:60193938-60194032:60197788-60197838:60198030-60199195:+	chr11:60197788-60197838	NA	NA	NA	NA	NA	NA	NA	NA	NA	NA	0.974	NA	NA	NA	NA	NA	NA	NA	NA	NA	NA	NA	NA	NA
RI	Rps18:chr17:33952220-33952312:33952220-33952591:33952402-33952591:-	chr17:33952312-33952402	0.039	0.04	0.041	0.043	0.045	0.043	0.043	0.036	0.051	0.044	0.044	0.045	0.028	0.044	0.041	0.035	0.042	0.044	0.028	0.042	0.037	0.049	0.037	0.044
SE	Clptm1:chr7:19634055-19634223:19634877-19635013:19635307-19635403:-	chr7:19634877-19635013	NA	NA	NA	NA	NA	NA	NA	0.993	NA	NA	NA	NA	NA	NA	NA	NA	NA	NA	NA	NA	NA	NA	NA	NA
A3SS	Spdl1:chr11:34822373-34822468:34822373-34822472:34822559-34822709:-	chr11:34822468-34822472	NA	NA	0.796	NA	NA	NA	NA	NA	NA	NA	NA	NA	NA	NA	NA	NA	NA	NA	NA	NA	NA	NA	NA	NA
RI	Alas1:chr9:106241115-106241338:106241115-106241785:106241635-106241785:-	chr9:106241338-106241635	0.011	0.021	0.034	0.01	0.039	0.032	0.027	0.008	0.076	0.032	0.031	0.086	0.024	0.095	0.047	NA	0.025	0.084	0.025	0.024	0.034	0.028	0.044	0.051
SE	Gnpnat1:chr14:45383393-45383456:45384580-45384748:45388747-45388793:-	chr14:45384580-45384748	NA	NA	NA	NA	NA	NA	NA	NA	NA	NA	NA	NA	0.991	NA	NA	NA	NA	NA	NA	NA	NA	NA	NA	NA
A3SS	Hexim2:chr11:103134034-103134141:103134031-103134141:103132428-103132603:+	chr11:103134031-103134034	NA	NA	NA	NA	NA	NA	NA	NA	NA	NA	NA	NA	NA	NA	NA	NA	NA	0.662	NA	NA	NA	NA	NA	NA
A3SS	Orc4:chr2:48910185-48910242:48910185-48910294:48912561-48912648:-	chr2:48910242-48910294	0.914	0.976	0.91	NA	0.945	0.926	0.902	0.976	0.952	0.99	0.927	0.884	0.916	0.972	0.934	0.764	0.892	0.912	0.962	0.975	NA	0.875	0.952	0.869
RI	Smarcc2:chr10:128474371-128474409:128474371-128474813:128474682-128474813:+	chr10:128474409-128474682	0.022	0.06	0.046	0.024	0.052	0.048	0.05	0.048	0.037	0.025	0.054	0.06	0.065	0.043	0.036	0.089	0.108	0.056	0.037	0.032	0.045	0.063	0.026	0.057
SE	Pdcd2:chr17:15522702-15522906:15525268-15525400:15526540-15526612:-	chr17:15525268-15525400	NA	NA	NA	NA	NA	NA	NA	NA	NA	0.964	NA	NA	NA	NA	NA	NA	NA	NA	NA	NA	NA	NA	NA	NA
SE	Shroom1:chr11:53464274-53464330:53465119-53465308:53465495-53466044:+	chr11:53465119-53465308	0.569	NA	NA	NA	NA	0.941	NA	NA	0.569	0.932	NA	NA	NA	0.925	0.893	NA	NA	NA	NA	NA	0.726	0.841	0.851	0.714
SE	Rap1gds1:chr3:138957136-138957544:138958553-138958685:138959035-138959179:-	chr3:138958553-138958685	NA	NA	NA	NA	NA	NA	NA	NA	NA	NA	NA	NA	NA	NA	NA	NA	NA	NA	0.963	NA	NA	NA	NA	NA
SE	Mapkapk5:chr5:121534334-121534430:121537111-121537220:121538392-121538490:-	chr5:121537111-121537220	NA	NA	NA	NA	NA	NA	NA	NA	NA	NA	NA	NA	0.769	NA	NA	NA	NA	NA	NA	NA	NA	NA	NA	NA
SE	B3galnt2:chr13:13970766-13970867:13975437-13975634:13980600-13980696:+	chr13:13975437-13975634	NA	0.986	0.984	NA	NA	NA	0.932	0.983	NA	0.963	0.948	0.926	0.922	NA	0.929	NA	0.986	NA	NA	0.987	NA	0.919	NA	0.933
RI	Drp2:chrX:134440334-134440420:134440334-134441386:134441228-134441386:+	chrX:134440420-134441228	0.172	0.037	NA	0.802	0.454	0.395	NA	0.201	0.438	0.244	NA	0.257	0.194	0.237	0.041	NA	NA	0.398	NA	0.105	0.011	0.28	0.438	NA
SE	Bbip1:chr19:53932129-53932205:53943465-53943579:53944155-53944180:-	chr19:53943465-53943579	NA	NA	0.841	0.928	0.969	NA	NA	NA	NA	NA	0.966	NA	NA	0.96	NA	NA	NA	NA	NA	NA	NA	NA	0.953	NA
SE	Nexn:chr3:152243825-152244023:152247085-152247274:152247932-152248103:-	chr3:152247085-152247274	NA	NA	NA	NA	NA	NA	NA	NA	NA	NA	NA	NA	NA	NA	NA	NA	NA	NA	NA	NA	NA	NA	NA	0.934
SE	Parva:chr7:112576935-112577004:112579655-112579757:112580949-112581022:+	chr7:112579655-112579757	NA	0.998	NA	NA	NA	NA	NA	NA	NA	NA	NA	NA	NA	NA	NA	NA	NA	NA	NA	NA	NA	NA	NA	NA
SE	Fam169b:chr7:68321819-68321905:68329221-68329399:68350233-68350416:+	chr7:68329221-68329399	NA	0.838	0.848	NA	NA	0.903	NA	0.913	0.561	0.804	NA	0.936	0.82	0.852	0.81	0.81	0.828	0.968	0.848	0.886	0.477	0.808	0.755	0.751
SE	Tarbp2:chr15:102521039-102521213:102521723-102521796:102521980-102522044:+	chr15:102521723-102521796	NA	NA	NA	NA	0.984	0.973	NA	NA	NA	NA	NA	NA	NA	NA	NA	NA	NA	0.974	NA	NA	NA	0.916	NA	NA
SE	Senp5:chr16:31976959-31977757:31983263-31983311:31983492-31983631:-	chr16:31983263-31983311	NA	NA	NA	0.953	NA	NA	0.965	NA	NA	NA	0.979	0.981	NA	NA	0.964	NA	NA	NA	NA	NA	0.973	NA	NA	NA
SE	Osgepl1:chr1:53321079-53321210:53321304-53321384:53321495-53321567:+	chr1:53321304-53321384	NA	NA	NA	NA	NA	NA	NA	NA	NA	NA	NA	NA	NA	NA	NA	NA	NA	NA	NA	NA	NA	0.018	NA	NA
SE	Ift88:chr14:57477890-57478077:57479896-57480005:57481395-57481511:+	chr14:57479896-57480005	NA	NA	NA	0.743	NA	NA	NA	NA	NA	NA	NA	NA	NA	NA	NA	NA	NA	NA	NA	NA	NA	NA	NA	NA
SE	Ubox5:chr2:130590001-130592014:130597297-130597456:130599513-130600711:-	chr2:130597297-130597456	0.931	0.886	NA	NA	NA	NA	NA	NA	NA	NA	NA	NA	NA	NA	NA	NA	0.97	NA	NA	0.964	NA	NA	NA	NA
SE	Nadk:chr4:155562377-155562455:155576992-155577197:155579310-155579340:+	chr4:155576992-155577197	0.995	NA	NA	NA	NA	NA	NA	NA	NA	NA	NA	NA	NA	NA	NA	NA	NA	NA	NA	NA	NA	NA	NA	NA
SE	Ube2j2:chr4:155943868-155944013:155946254-155946417:155949006-155949137:+	chr4:155946254-155946417	0.454	0.481	0.558	0.666	0.626	0.526	0.544	0.854	0.634	0.57	0.412	0.598	0.721	0.748	0.532	0.393	0.498	0.586	0.478	0.552	0.457	0.586	0.485	0.615
SE	Ift46:chr9:44773687-44773784:44776359-44776437:44778561-44778638:+	chr9:44776359-44776437	NA	NA	NA	0.029	NA	NA	NA	NA	NA	NA	NA	NA	NA	NA	NA	NA	0.009	NA	NA	NA	NA	NA	NA	NA
RI	Snx32:chr19:5498179-5498301:5498179-5498506:5498395-5498506:-	chr19:5498301-5498395	0.38	0.324	0.205	0.345	0.395	0.509	0.393	0.347	0.447	0.096	0.626	0.109	0.349	0.241	0.253	NA	0.292	0.597	0.17	0.329	0.505	0.238	0.177	0.272
SE	Epb41l3:chr17:69270610-69270664:69274703-69274895:69284538-69284916:+	chr17:69274703-69274895	0.964	0.891	0.961	NA	0.9	0.976	NA	0.892	0.883	0.984	NA	0.929	NA	0.961	0.957	0.936	0.974	0.986	0.869	NA	0.974	0.913	0.947	0.929
SE	Cfap69:chr5:5618947-5619069:5621464-5621539:5621919-5622043:-	chr5:5621464-5621539	0.25	NA	NA	NA	NA	NA	NA	NA	NA	NA	NA	NA	NA	NA	NA	NA	NA	NA	NA	NA	NA	NA	NA	NA
SE	Hcfc2:chr10:82700918-82701067:82702442-82702603:82709008-82709057:+	chr10:82702442-82702603	0.805	NA	NA	NA	NA	0.945	NA	NA	NA	NA	NA	0.98	NA	NA	NA	NA	NA	NA	NA	NA	NA	NA	NA	NA
SE	Trmt2b:chrX:134262784-134262884:134263726-134263861:134266260-134266315:-	chrX:134263726-134263861	0.967	NA	0.966	0.897	NA	0.928	0.945	0.904	0.867	0.932	0.921	0.938	NA	0.889	0.949	NA	0.919	0.847	0.974	0.97	NA	0.976	0.975	0.913
SE	Asb3:chr11:31061388-31061586:31081361-31081622:31085000-31085131:+	chr11:31081361-31081622	NA	NA	NA	NA	NA	NA	NA	NA	NA	NA	0.942	NA	NA	NA	NA	NA	NA	NA	NA	NA	0.946	NA	NA	NA
SE	Adap2:chr11:80165672-80165819:80170677-80170761:80174087-80174150:+	chr11:80170677-80170761	NA	NA	NA	NA	NA	NA	NA	NA	0.561	NA	NA	NA	NA	NA	NA	NA	NA	NA	NA	NA	NA	NA	NA	NA
A3SS	Tle2:chr10:81576597-81576642:81576528-81576642:81576235-81576299:+	chr10:81576528-81576597	0.082	0.114	0.026	0.153	0.085	0.135	0.119	0.117	0.077	0.14	0.111	0.12	0.084	0.059	0.056	NA	0.146	0.126	0.186	0.113	0.04	0.215	0.173	0.055
SE	Cyp4f16:chr17:32536557-32536655:32536994-32537196:32542737-32542791:+	chr17:32536994-32537196	NA	NA	NA	NA	NA	NA	NA	NA	0.817	NA	NA	NA	NA	0.914	NA	NA	NA	NA	NA	NA	NA	NA	NA	NA
RI	Tgfb1i1:chr7:128248577-128248720:128248577-128248974:128248886-128248974:+	chr7:128248720-128248886	0.018	0.015	0.03	0.022	0.018	0.007	0.014	0.024	0.035	0.016	0.018	0.022	0.028	0.023	0.01	0.024	0.018	0.032	0.041	0.039	0.034	0.013	0.031	0.024
SE	Capn7:chr14:31363478-31363623:31364447-31364547:31365455-31365591:+	chr14:31364447-31364547	NA	NA	NA	NA	NA	0.991	NA	NA	NA	NA	NA	NA	NA	0.958	NA	NA	NA	NA	NA	NA	NA	NA	0.937	NA
A5SS	Mr1:chr1:155137593-155137774:155137513-155137774:155136574-155136850:-	chr1:155137513-155137593	0.968	0.936	0.883	NA	0.809	0.939	0.852	0.92	0.695	0.943	0.796	0.911	0.871	0.962	0.876	0.964	0.92	0.752	0.827	0.971	0.787	0.894	NA	0.923
SE	Arrb1:chr7:99583659-99583720:99587214-99587259:99587997-99588128:+	chr7:99587214-99587259	NA	NA	0.754	NA	NA	NA	NA	NA	NA	NA	NA	NA	NA	NA	NA	NA	NA	NA	NA	NA	NA	NA	NA	NA
SE	Nfia:chr4:97956373-97956439:98000391-98000466:98014212-98014330:+	chr4:98000391-98000466	NA	NA	NA	NA	NA	NA	NA	NA	NA	NA	NA	NA	NA	NA	NA	NA	NA	NA	NA	NA	0.99	NA	NA	NA
SE	Cd59b:chr2:104078857-104078936:104090128-104090274:104091003-104091160:+	chr2:104090128-104090274	0.654	NA	NA	NA	NA	NA	NA	NA	NA	NA	NA	NA	NA	NA	NA	NA	NA	NA	NA	NA	NA	NA	NA	NA
A5SS	Gpt2:chr8:85505578-85505687:85505578-85505867:85509178-85509309:+	chr8:85505687-85505867	0.003	NA	NA	0.018	NA	NA	NA	NA	0.016	NA	NA	NA	NA	NA	NA	NA	NA	NA	NA	0.014	NA	NA	NA	0.017
SE	Myo18a:chr11:77821041-77821186:77822662-77822674:77823275-77823446:+	chr11:77822662-77822674	0.01	0.028	0.021	NA	NA	NA	0.041	NA	NA	0.022	0.046	NA	NA	NA	NA	0.18	0.053	0.015	0.222	NA	0.013	NA	0.02	NA
SE	Rabl2:chr15:89587892-89588217:89590272-89590426:89591819-89591839:-	chr15:89590272-89590426	NA	NA	NA	NA	NA	NA	NA	0.887	NA	NA	NA	NA	NA	NA	NA	NA	0.838	NA	NA	NA	NA	NA	NA	NA
RI	Zfp512b:chr2:181589372-181589959:181589372-181590181:181590052-181590181:-	chr2:181589959-181590052	0.678	0.738	0.604	0.618	0.527	0.645	0.574	0.566	0.732	0.444	0.532	0.635	0.575	0.677	0.831	NA	0.859	0.546	0.494	0.747	0.618	0.747	0.724	0.766
A3SS	Sltm:chr9:70573510-70573925:70573456-70573925:70572148-70572176:+	chr9:70573456-70573510	0.604	0.798	0.696	0.631	0.423	0.5	0.528	0.696	0.412	0.507	0.894	0.601	0.734	0.717	0.746	0.537	0.688	0.436	0.478	0.587	0.501	0.695	0.763	0.638
A5SS	Adamts14:chr10:61229655-61229803:61229646-61229803:61227106-61227212:-	chr10:61229646-61229655	NA	0.031	0.016	NA	NA	NA	0.654	NA	NA	NA	NA	NA	NA	NA	NA	NA	NA	NA	NA	NA	NA	0.054	NA	0.033
SE	Slc35c2:chr2:165280616-165280700:165280785-165280891:165281307-165281380:-	chr2:165280785-165280891	NA	NA	0.974	NA	0.954	NA	NA	NA	NA	0.939	0.854	0.98	NA	NA	NA	NA	NA	NA	0.961	NA	NA	0.987	NA	NA
SE	Cd47:chr16:49906780-49906812:49908053-49908082:49910873-49911081:+	chr16:49908053-49908082	NA	NA	NA	0.746	0.594	0.358	NA	0.527	0.834	0.456	0.87	0.557	0.456	0.557	NA	NA	NA	0.661	NA	NA	NA	0.807	0.239	0.295
SE	Sbf2:chr7:110339889-110340074:110347886-110347982:110348854-110348995:-	chr7:110347886-110347982	NA	0.01	0.007	NA	NA	NA	NA	0.013	NA	NA	NA	NA	NA	NA	NA	NA	NA	NA	NA	NA	NA	NA	0.011	NA
RI	Dgkq:chr5:108649586-108649733:108649586-108649925:108649824-108649925:-	chr5:108649733-108649824	0.118	0.194	0.138	0.117	0.21	0.074	0.185	0.078	0.104	0.312	0.225	0.068	0.242	0.168	0.204	NA	0.102	0.131	0.057	0.141	0.149	0.138	0.168	0.221
SE	Cryl1:chr14:57312967-57313129:57362921-57363048:57382757-57382865:-	chr14:57362921-57363048	NA	NA	NA	NA	NA	NA	NA	0.962	NA	NA	NA	NA	NA	NA	NA	NA	NA	NA	NA	NA	NA	NA	NA	NA
SE	Ankrd27:chr7:35616846-35616939:35619314-35619512:35620357-35620417:+	chr7:35619314-35619512	NA	NA	NA	NA	NA	NA	NA	NA	NA	NA	NA	NA	NA	NA	NA	NA	NA	NA	NA	NA	NA	NA	NA	0.904
SE	Ablim2:chr5:35848775-35848905:35849515-35849569:35857127-35857180:+	chr5:35849515-35849569	0.875	NA	NA	0.982	0.227	NA	NA	NA	0.926	NA	NA	NA	NA	NA	NA	NA	NA	NA	NA	0.955	NA	0.524	NA	0.595
SE	Abi3bp:chr16:56620441-56620522:56622028-56622085:56642488-56642560:+	chr16:56622028-56622085	NA	NA	NA	NA	NA	0.979	NA	0.97	NA	0.97	NA	0.925	0.755	NA	NA	NA	NA	0.773	0.916	NA	NA	NA	0.973	NA
SE	Syt7:chr19:10417962-10418042:10421756-10421888:10426298-10426667:+	chr19:10421756-10421888	NA	NA	NA	NA	NA	NA	NA	NA	NA	NA	NA	NA	NA	NA	NA	NA	NA	NA	NA	NA	NA	0.347	NA	NA
RI	Adam33:chr2:131053041-131053150:131053041-131053588:131053389-131053588:-	chr2:131053150-131053389	NA	NA	NA	NA	NA	NA	NA	NA	NA	NA	NA	NA	NA	NA	0.857	NA	NA	NA	NA	NA	NA	NA	NA	NA
SE	Myo9a:chr9:59815243-59815378:59821584-59821706:59824190-59824332:+	chr9:59821584-59821706	NA	NA	NA	NA	NA	NA	NA	NA	NA	NA	NA	NA	NA	NA	NA	NA	NA	NA	NA	NA	0.883	NA	NA	NA
SE	Ptk2:chr15:73264213-73264329:73266101-73266202:73268808-73268893:-	chr15:73266101-73266202	NA	NA	NA	NA	NA	NA	NA	NA	NA	NA	NA	0.944	NA	NA	0.981	NA	0.967	NA	NA	NA	NA	0.894	NA	0.982
SE	Parl:chr16:20279817-20280085:20282722-20282820:20285764-20285835:-	chr16:20282722-20282820	NA	NA	NA	0.969	NA	NA	NA	NA	NA	NA	NA	NA	NA	NA	NA	NA	NA	NA	NA	NA	NA	NA	NA	0.968
SE	Rcbtb1:chr14:59226307-59226498:59228254-59228381:59229886-59229961:+	chr14:59228254-59228381	NA	0.895	NA	NA	NA	0.987	NA	NA	NA	NA	NA	NA	NA	NA	NA	NA	NA	NA	NA	NA	NA	NA	0.979	NA
SE	Sec11a:chr7:80920894-80923220:80927736-80927886:80935026-80935136:-	chr7:80927736-80927886	0.997	NA	NA	NA	0.992	0.997	NA	NA	NA	NA	NA	NA	0.977	0.992	0.983	NA	0.995	NA	NA	0.993	0.997	NA	0.994	NA
RI	Polr2i:chr7:30232331-30232404:30232331-30232536:30232481-30232536:+	chr7:30232404-30232481	0.213	0.201	0.188	0.185	0.121	0.074	0.299	0.098	0.139	0.131	0.19	0.083	0.312	0.124	0.116	0.235	0.146	0.139	0.25	0.154	0.194	0.194	0.152	0.14
SE	Sec31b:chr19:44526997-44527072:44528665-44528896:44531680-44531770:-	chr19:44528665-44528896	0.87	NA	NA	NA	0.37	NA	NA	NA	NA	NA	NA	NA	NA	NA	NA	NA	NA	NA	NA	NA	NA	NA	NA	NA
SE	Gls:chr1:52199854-52199887:52200617-52200651:52207300-52207359:-	chr1:52200617-52200651	0.021	0.014	0.01	0.008	NA	0.015	0.118	0.021	NA	0.024	NA	0.038	0.061	NA	NA	NA	NA	0.005	0.019	NA	0.014	NA	0.026	NA
SE	Mysm1:chr4:94948101-94948159:94948328-94948434:94950925-94951058:-	chr4:94948328-94948434	NA	NA	NA	NA	NA	0.94	0.92	NA	0.902	NA	NA	NA	NA	NA	NA	NA	NA	NA	NA	0.975	NA	0.88	0.961	NA
SE	Arhgap1:chr2:91662297-91662385:91668196-91668328:91668485-91668572:+	chr2:91668196-91668328	NA	NA	NA	NA	NA	NA	NA	NA	0.992	NA	NA	NA	NA	NA	NA	NA	NA	NA	NA	NA	NA	NA	NA	NA
RI	Sema3f:chr9:107684221-107684379:107684221-107684591:107684549-107684591:-	chr9:107684379-107684549	0.011	0.033	0.016	0.11	0.034	0.023	0.021	0.02	0.018	0.038	0.063	0.023	0.03	0.023	NA	NA	0.03	0.021	0.224	0.075	0.063	NA	0.06	0.035
SE	Syne1:chr10:5218498-5218758:5220285-5220504:5221862-5222007:-	chr10:5220285-5220504	NA	NA	0.213	0.829	0.899	NA	NA	0.937	0.646	0.943	NA	NA	NA	0.775	NA	NA	NA	NA	0.866	NA	0.873	NA	NA	0.632
SE	Col6a1:chr10:76720960-76721005:76721087-76721108:76721262-76721283:-	chr10:76721087-76721108	NA	NA	NA	NA	NA	NA	NA	NA	NA	NA	NA	NA	NA	0.999	NA	NA	NA	NA	NA	NA	NA	NA	NA	NA
SE	Nckipsd:chr9:108808372-108808654:108810821-108810902:108811045-108811149:+	chr9:108810821-108810902	NA	NA	NA	0.049	0.023	NA	0.029	NA	NA	NA	NA	NA	NA	0.058	NA	NA	NA	NA	NA	NA	NA	NA	0.129	NA
RI	Eps8l2:chr7:141341892-141341974:141341892-141342110:141342054-141342110:+	chr7:141341974-141342054	NA	NA	NA	NA	0.115	0.051	NA	0.018	NA	0.143	NA	0.096	0.058	NA	NA	NA	NA	0.056	NA	NA	0.178	0.075	0.055	NA
SE	Acsl3:chr1:78657882-78658103:78681592-78682010:78688236-78688282:+	chr1:78681592-78682010	NA	NA	NA	NA	NA	NA	NA	NA	NA	NA	NA	NA	NA	NA	NA	NA	NA	NA	NA	NA	NA	NA	NA	0.977
RI	Riok3:chr18:12135851-12135967:12135851-12137035:12136927-12137035:+	chr18:12135967-12136927	NA	NA	NA	NA	NA	NA	NA	NA	NA	NA	NA	0.806	NA	NA	NA	NA	NA	NA	NA	NA	NA	NA	NA	NA
SE	Poglut3:chr9:53395843-53396038:53397919-53398024:53399686-53401867:+	chr9:53397919-53398024	NA	NA	NA	NA	NA	NA	NA	NA	NA	0.977	NA	0.985	NA	NA	NA	NA	NA	NA	NA	NA	NA	NA	NA	NA
SE	Tgfb1i1:chr7:128248017-128248472:128248577-128248720:128248886-128248974:+	chr7:128248577-128248720	NA	0.995	0.996	NA	0.993	0.997	NA	0.985	0.993	NA	NA	0.993	NA	0.994	0.984	NA	0.996	0.984	0.985	0.992	0.986	0.996	NA	0.984
SE	Cdc42bpb:chr12:111306441-111306547:111307778-111307856:111308107-111308197:-	chr12:111307778-111307856	NA	NA	NA	NA	NA	NA	NA	NA	NA	NA	NA	NA	NA	NA	NA	NA	NA	NA	NA	NA	NA	NA	NA	0.994
A3SS	Rab22a:chr2:173695258-173695365:173695207-173695365:173688146-173688228:+	chr2:173695207-173695258	NA	NA	0.651	NA	NA	NA	NA	NA	NA	NA	NA	NA	NA	NA	NA	NA	NA	NA	NA	NA	NA	NA	NA	NA
RI	Pofut2:chr10:77265835-77266032:77265835-77267093:77266912-77267093:+	chr10:77266032-77266912	0.521	0.674	0.537	NA	0.303	0.85	0.406	0.653	0.555	NA	0.856	0.802	NA	0.78	0.314	NA	0.685	0.526	0.336	0.443	NA	0.728	NA	0.822
SE	Lrrfip2:chr9:111205754-111205847:111207796-111207889:111213812-111213914:+	chr9:111207796-111207889	NA	NA	0.381	0.86	NA	NA	NA	NA	NA	NA	NA	NA	NA	NA	NA	NA	0.235	NA	NA	0.908	NA	NA	NA	NA
A3SS	Snhg16:chr11:116675507-116675798:116674299-116675798:116673937-116674071:+	chr11:116674299-116675507	NA	NA	NA	NA	NA	NA	NA	NA	NA	NA	NA	NA	NA	NA	NA	NA	NA	NA	NA	NA	0.933	NA	NA	NA
SE	Mical2:chr7:112346721-112346908:112349393-112349482:112351324-112351427:+	chr7:112349393-112349482	NA	NA	NA	NA	NA	NA	NA	NA	NA	NA	NA	NA	NA	NA	NA	NA	NA	NA	NA	NA	NA	NA	0.939	NA
SE	2310057M21Rik:chr7:131348691-131351102:131357459-131357666:131361732-131361936:-	chr7:131357459-131357666	NA	NA	NA	NA	NA	NA	NA	NA	NA	NA	NA	NA	NA	NA	NA	NA	NA	NA	NA	NA	NA	NA	0.888	NA
A3SS	P3h3:chr6:124854310-124854447:124854310-124854452:124854847-124854979:-	chr6:124854447-124854452	0.068	0.03	0.087	0.028	0.065	0.058	0.043	0.075	0.056	0.057	0.049	0.049	0.063	0.053	0.105	0.155	0.042	0.049	0.032	0.077	0.089	0.064	0.053	0.061
A5SS	Nabp1:chr1:51478300-51478399:51477824-51478399:51477477-51477616:-	chr1:51477824-51478300	0.595	0.529	0.458	0.62	0.639	0.79	0.735	0.846	0.604	0.403	0.656	0.917	0.836	0.678	0.481	0.171	0.409	0.651	0.61	0.653	0.736	0.349	0.828	0.48
SE	Rnaseh2a:chr8:84959775-84959863:84959966-84960104:84965130-84965218:-	chr8:84959966-84960104	NA	NA	0.981	NA	0.973	NA	NA	NA	NA	NA	NA	NA	NA	NA	NA	NA	NA	NA	NA	NA	NA	NA	NA	NA
SE	Lmf1:chr17:25579084-25579379:25588675-25588686:25612295-25612444:+	chr17:25588675-25588686	NA	NA	NA	NA	NA	NA	NA	NA	NA	NA	NA	NA	NA	NA	NA	NA	NA	NA	0.651	NA	NA	NA	NA	NA
SE	Hadha:chr5:30147345-30147416:30147979-30148021:30154881-30154962:-	chr5:30147979-30148021	NA	NA	NA	NA	NA	0.995	NA	NA	NA	NA	0.996	NA	NA	NA	NA	NA	NA	NA	NA	NA	0.995	NA	NA	NA
SE	Vps39:chr2:120345617-120345660:120350163-120350229:120352914-120353109:-	chr2:120350163-120350229	NA	NA	0.868	NA	0.912	NA	0.951	NA	NA	NA	NA	NA	NA	NA	NA	NA	NA	NA	NA	NA	NA	NA	NA	NA
SE	Orai3:chr7:127769814-127770216:127770733-127770878:127773556-127775150:+	chr7:127770733-127770878	0.038	0.01	NA	NA	0.013	0.006	0.022	0.037	0.028	NA	NA	NA	NA	0.051	NA	NA	NA	0.058	NA	NA	0.032	0.073	0.024	NA
SE	Naaa:chr5:92272443-92272570:92276918-92277083:92277911-92278170:-	chr5:92276918-92277083	0.959	NA	NA	0.944	0.974	0.966	0.966	NA	NA	0.968	0.931	0.99	NA	NA	NA	NA	NA	0.936	0.786	0.961	0.98	NA	0.965	NA
SE	Iqsec2:chrX:152178963-152179090:152180996-152181092:152202907-152203169:+	chrX:152180996-152181092	NA	NA	0.108	NA	NA	NA	NA	NA	0.68	NA	NA	NA	NA	0.288	NA	NA	0.477	0.378	NA	NA	NA	NA	0.549	NA
A3SS	Mfsd10:chr5:34635608-34635742:34635608-34635767:34636020-34636124:-	chr5:34635742-34635767	NA	NA	NA	0.99	0.968	0.97	0.992	0.962	NA	0.992	NA	0.981	0.99	0.994	0.848	NA	0.985	0.949	NA	0.993	NA	NA	0.993	0.962
SE	Cpne8:chr15:90571944-90572048:90584877-90584941:90615110-90615150:-	chr15:90584877-90584941	0.922	NA	0.941	NA	NA	0.885	NA	NA	NA	0.926	0.93	NA	NA	0.878	0.863	NA	NA	0.834	NA	NA	NA	0.946	NA	NA
SE	Nbr1:chr11:101555809-101555875:101556174-101556291:101559518-101559545:+	chr11:101556174-101556291	NA	NA	NA	NA	NA	0.989	NA	NA	NA	NA	0.996	NA	NA	NA	NA	NA	NA	NA	NA	NA	NA	NA	NA	NA
A5SS	Smarca1:chrX:47887111-47887198:47887096-47887198:47884036-47884203:-	chrX:47887096-47887111	0.405	NA	0.645	NA	0.132	0.154	0.115	0.335	0.405	0.185	0.259	0.304	0.254	0.421	NA	NA	0.168	0.092	0.185	0.476	0.185	NA	0.221	NA
A3SS	Spsb3:chr17:24891010-24891136:24890832-24891136:24890567-24890755:+	chr17:24890832-24891010	NA	NA	NA	NA	NA	NA	NA	NA	NA	NA	NA	NA	NA	NA	NA	NA	NA	NA	NA	NA	NA	NA	0.96	NA
RI	Gabre:chrX:72264518-72264608:72264518-72264739:72264704-72264739:-	chrX:72264608-72264704	NA	NA	NA	NA	NA	NA	NA	NA	NA	NA	0.378	NA	0.709	0.785	NA	NA	0.77	NA	0.709	NA	NA	0.879	0.83	0.912
SE	Shkbp1:chr7:27351695-27351886:27351979-27352128:27352594-27352756:-	chr7:27351979-27352128	NA	NA	NA	NA	NA	0.923	NA	NA	NA	NA	NA	NA	NA	NA	0.962	NA	NA	NA	NA	NA	0.833	NA	NA	NA
SE	Morrbid:chr2:128236601-128238200:128330844-128331049:128429093-128429234:-	chr2:128330844-128331049	NA	NA	NA	NA	NA	NA	NA	NA	NA	NA	NA	NA	0.678	NA	NA	NA	NA	NA	NA	NA	NA	NA	NA	NA
A3SS	Slc36a4:chr9:15736948-15737041:15736871-15737041:15734136-15734306:+	chr9:15736871-15736948	NA	NA	NA	NA	NA	NA	NA	0.982	0.956	NA	NA	NA	NA	NA	NA	NA	0.97	NA	NA	NA	NA	NA	NA	NA
SE	Ppil2:chr16:17092684-17092791:17093010-17093086:17096004-17096080:-	chr16:17093010-17093086	NA	NA	NA	NA	NA	NA	NA	NA	NA	NA	NA	NA	NA	NA	NA	NA	NA	NA	NA	0.96	NA	NA	NA	NA
SE	1110059E24Rik:chr19:21615402-21615445:21619108-21619215:21652606-21652917:-	chr19:21619108-21619215	NA	NA	NA	NA	NA	NA	0.933	NA	NA	NA	NA	NA	NA	NA	NA	NA	NA	NA	NA	NA	NA	NA	NA	NA
A3SS	Dmtf1:chr5:9126539-9126643:9126539-9126802:9127956-9128108:-	chr5:9126643-9126802	0.892	0.929	0.925	0.866	0.924	NA	0.958	0.763	NA	0.964	0.892	0.863	NA	0.919	0.946	0.766	0.825	0.948	0.748	0.86	0.921	0.845	0.787	0.849
SE	Klhl13:chrX:23248111-23248244:23261434-23261573:23315129-23315179:-	chrX:23261434-23261573	NA	0.963	NA	NA	NA	NA	NA	NA	NA	0.936	NA	NA	NA	NA	0.954	NA	NA	NA	NA	NA	NA	NA	NA	NA
SE	Raly:chr2:154791132-154791548:154821006-154821089:154857268-154857338:+	chr2:154821006-154821089	0.635	0.544	0.544	0.616	0.673	0.656	0.647	0.677	0.657	0.64	0.709	0.68	0.649	0.679	0.543	0.664	0.573	0.613	0.522	0.608	0.64	0.561	0.648	0.588
RI	Dab2ip:chr2:35728057-35728128:35728057-35730992:35730423-35730992:+	chr2:35728128-35730423	NA	NA	NA	0.99	NA	NA	NA	NA	NA	NA	NA	NA	0.963	NA	NA	NA	NA	NA	NA	NA	NA	NA	NA	NA
A3SS	Slc22a17:chr14:54908822-54908863:54908822-54908988:54909670-54909825:-	chr14:54908863-54908988	NA	0.807	0.845	0.937	0.979	NA	0.962	0.943	0.895	0.777	0.95	0.931	0.944	0.867	0.876	NA	0.815	0.862	0.72	0.945	NA	0.938	0.72	0.738
SE	Polr3e:chr7:120917743-120917910:120922898-120922968:120924221-120924272:+	chr7:120922898-120922968	NA	NA	NA	NA	NA	NA	NA	0.959	NA	NA	NA	NA	NA	NA	NA	NA	NA	NA	NA	NA	0.964	NA	NA	NA
SE	Mlxipl:chr5:135122069-135122114:135123649-135123851:135123936-135124017:+	chr5:135123649-135123851	NA	0.175	NA	0.977	NA	NA	0.936	NA	NA	NA	NA	NA	NA	NA	NA	NA	NA	NA	NA	NA	0.931	NA	NA	NA
SE	Plin2:chr4:86660087-86660269:86661933-86662213:86664428-86664511:-	chr4:86661933-86662213	NA	NA	0.997	NA	NA	NA	0.994	NA	NA	NA	NA	NA	NA	NA	NA	NA	0.998	NA	NA	NA	NA	NA	NA	0.996
RI	Dclre1a:chr19:56540181-56540322:56540181-56541623:56541504-56541623:-	chr19:56540322-56541504	0.111	0.207	0.123	0.133	0.19	0.29	0.135	0.319	0.157	0.08	0.213	0.237	0.125	0.065	0.115	NA	0.053	0.15	0.206	0.092	0.145	0.164	0.125	0.215
SE	Rasa4:chr5:136101243-136101689:136101944-136102057:136102234-136102295:+	chr5:136101944-136102057	0.926	NA	NA	0.969	NA	0.923	0.94	NA	0.948	0.938	0.87	0.972	NA	0.948	0.829	NA	NA	0.893	NA	0.981	0.962	0.959	0.826	NA
RI	Rabgap1l:chr1:160740751-160740799:160740751-160740931:160740883-160740931:-	chr1:160740799-160740883	NA	NA	0.918	0.947	0.786	0.814	NA	0.862	0.852	0.855	0.9	0.89	0.858	NA	0.885	NA	NA	0.938	0.707	NA	NA	0.697	0.883	0.831
SE	Pde4b:chr4:102570094-102570878:102590830-102590924:102595933-102596112:+	chr4:102590830-102590924	NA	NA	NA	NA	NA	0.964	NA	NA	NA	NA	NA	NA	NA	NA	NA	NA	NA	NA	NA	NA	NA	0.991	NA	NA
SE	Emsy:chr7:98612983-98613157:98615475-98615612:98619298-98619469:-	chr7:98615475-98615612	NA	NA	NA	NA	0.975	NA	NA	NA	NA	NA	NA	NA	NA	NA	NA	NA	NA	NA	NA	NA	NA	NA	NA	NA
SE	Ap2a1:chr7:44903143-44903200:44903461-44903527:44903740-44903901:-	chr7:44903461-44903527	0.082	0.015	0.025	0.24	0.014	0.073	NA	NA	0.076	0.032	0.028	NA	0.117	0.038	0.073	NA	0.01	0.062	0.025	0.191	0.05	0.025	NA	0.005
SE	Bst1:chr5:43822266-43822349:43825327-43825404:43837460-43837547:+	chr5:43825327-43825404	NA	NA	NA	NA	NA	NA	NA	NA	NA	NA	NA	NA	NA	NA	NA	NA	NA	NA	NA	NA	NA	NA	0.918	NA
SE	Tprkb:chr6:85924359-85924522:85927240-85927363:85927807-85927940:+	chr6:85927240-85927363	NA	NA	NA	NA	NA	NA	NA	NA	NA	NA	NA	NA	NA	NA	0.991	NA	NA	NA	0.92	NA	NA	NA	NA	NA
SE	Zmynd8:chr2:165828207-165828689:165833307-165833424:165834889-165834967:-	chr2:165833307-165833424	NA	NA	NA	NA	NA	NA	NA	NA	NA	NA	0.968	NA	NA	NA	NA	NA	NA	NA	NA	NA	NA	NA	NA	NA
SE	Wdr11:chr7:129608841-129608926:129613866-129613973:129616593-129616669:+	chr7:129613866-129613973	NA	NA	NA	NA	NA	NA	NA	NA	0.949	NA	NA	NA	NA	NA	NA	NA	NA	NA	NA	NA	NA	NA	NA	NA
SE	Camsap1:chr2:25952677-25952819:25956246-25956327:25965662-25965750:-	chr2:25956246-25956327	NA	NA	NA	NA	NA	NA	NA	NA	NA	NA	NA	NA	NA	NA	NA	NA	NA	NA	NA	0.972	NA	NA	NA	NA
SE	Rnps1:chr17:24421748-24421851:24422149-24422303:24424401-24424543:+	chr17:24422149-24422303	0.997	NA	0.994	NA	NA	NA	NA	NA	NA	NA	NA	0.996	NA	NA	NA	NA	NA	NA	NA	0.989	0.991	NA	NA	0.99
A5SS	Stat1:chr1:52119911-52120035:52119911-52120110:52122590-52122721:+	chr1:52120035-52120110	0.483	0.442	0.278	0.399	0.409	0.277	0.29	0.341	0.393	0.221	0.256	0.378	0.325	0.347	0.326	0.631	0.444	0.287	0.579	0.409	0.362	0.478	0.26	0.25
SE	Slc38a2:chr15:96693016-96693175:96693280-96693339:96693555-96693638:-	chr15:96693280-96693339	NA	NA	0.996	NA	NA	NA	NA	NA	NA	NA	NA	NA	NA	NA	NA	NA	NA	NA	NA	NA	NA	NA	NA	NA
SE	Sgce:chr6:4717920-4718078:4719373-4719496:4746979-4747070:-	chr6:4719373-4719496	0.996	NA	NA	0.947	0.988	NA	0.982	NA	NA	NA	0.983	0.995	NA	0.995	NA	NA	NA	0.989	NA	NA	0.976	NA	NA	NA
SE	Tnnt3:chr7:142505515-142505530:142507749-142507788:142508334-142508353:+	chr7:142507749-142507788	0.692	0.748	0.934	0.825	0.647	0.82	0.599	0.917	0.743	0.904	0.732	0.904	0.904	0.885	0.909	0.9	0.927	0.896	0.95	0.82	0.773	0.945	0.774	0.819
SE	Rpl27a:chr7:109519584-109519648:109519917-109519993:109521600-109522367:+	chr7:109519917-109519993	NA	NA	NA	NA	NA	NA	NA	NA	NA	NA	NA	NA	NA	NA	NA	NA	0.997	NA	NA	NA	NA	NA	NA	NA
SE	Fancl:chr11:26399648-26399709:26403321-26403378:26407547-26407648:+	chr11:26403321-26403378	NA	NA	NA	NA	NA	NA	NA	NA	NA	0.978	NA	NA	NA	NA	NA	NA	NA	NA	NA	NA	NA	NA	NA	NA
SE	Vps29:chr5:122354368-122354476:122360012-122360204:122362035-122362186:+	chr5:122360012-122360204	NA	NA	0.994	NA	NA	NA	NA	0.996	0.993	NA	NA	NA	0.996	NA	NA	NA	0.997	NA	NA	NA	NA	NA	NA	NA
SE	Clasp2:chr9:113786563-113786634:113813141-113813288:113835174-113835254:+	chr9:113813141-113813288	0.964	NA	NA	NA	NA	NA	0.982	0.99	NA	NA	NA	NA	0.956	0.982	0.971	NA	NA	0.956	NA	NA	NA	NA	NA	NA
SE	Dapk1:chr13:60718301-60718350:60718436-60718463:60719609-60719762:+	chr13:60718436-60718463	NA	NA	NA	NA	0.994	NA	NA	NA	NA	0.966	NA	NA	NA	NA	NA	NA	0.988	0.983	NA	NA	NA	NA	NA	NA
SE	Usp32:chr11:85081130-85081249:85083788-85083894:85103898-85104026:-	chr11:85083788-85083894	NA	0.966	NA	NA	0.757	NA	NA	NA	NA	NA	NA	NA	NA	NA	NA	NA	NA	NA	NA	NA	NA	NA	NA	NA
A5SS	Cenps:chr4:149132277-149132382:149132258-149132382:149131638-149131672:-	chr4:149132258-149132277	NA	NA	0.842	0.78	NA	0.955	NA	0.907	0.861	0.689	0.941	NA	NA	NA	0.639	NA	NA	NA	0.869	NA	0.509	NA	NA	NA
SE	Cttn:chr7:144449936-144450021:144452026-144452137:144454675-144454786:-	chr7:144452026-144452137	NA	NA	NA	NA	NA	NA	NA	NA	NA	NA	NA	NA	NA	NA	NA	NA	NA	NA	NA	NA	NA	NA	NA	0.534
SE	Fbxw4:chr19:45579652-45579793:45582715-45582801:45591728-45591794:-	chr19:45582715-45582801	NA	NA	NA	NA	NA	NA	NA	0.038	NA	NA	NA	NA	NA	NA	NA	NA	NA	NA	NA	NA	NA	0.037	NA	NA
SE	Klhdc3:chr17:46677931-46678108:46678280-46678493:46680701-46680914:-	chr17:46678280-46678493	NA	NA	0.99	NA	NA	NA	NA	NA	NA	NA	NA	NA	NA	NA	0.98	NA	0.977	NA	NA	NA	NA	0.974	0.987	NA
SE	Kdm6b:chr11:69408257-69408401:69408663-69408781:69413532-69413675:-	chr11:69408663-69408781	NA	NA	NA	NA	0.954	0.92	0.942	0.839	NA	0.945	0.806	0.782	NA	0.915	NA	NA	NA	NA	NA	0.96	NA	NA	0.936	NA
SE	Ggcx:chr6:72425785-72425949:72426360-72426626:72427041-72427173:+	chr6:72426360-72426626	NA	NA	NA	NA	NA	NA	NA	NA	NA	NA	NA	NA	NA	NA	NA	NA	NA	NA	NA	0.982	NA	NA	NA	NA
SE	Stau1:chr2:166950780-166951100:166951270-166952472:166953207-166953351:-	chr2:166951270-166952472	NA	NA	NA	NA	NA	NA	NA	NA	NA	NA	NA	NA	NA	NA	0.974	NA	NA	NA	NA	NA	NA	NA	NA	NA
A3SS	Zfp462:chr4:55016996-55017100:55016813-55017100:55014682-55014847:+	chr4:55016813-55016996	NA	0.054	0.18	0.022	0.202	0.064	NA	0.123	0.024	0.161	0.13	NA	0.047	0.044	0.098	NA	0.133	0.152	0.173	0.107	0.164	0.121	0.07	0.155
SE	Supt20:chr3:54696483-54696519:54696950-54697009:54698592-54698659:+	chr3:54696950-54697009	0.974	NA	NA	NA	NA	NA	NA	NA	NA	NA	NA	NA	NA	NA	NA	NA	NA	NA	NA	NA	NA	NA	NA	NA
SE	Traf2:chr2:25536675-25536774:25537070-25537149:25538844-25539084:-	chr2:25537070-25537149	NA	NA	NA	NA	NA	NA	NA	NA	NA	NA	NA	NA	NA	NA	NA	NA	NA	NA	NA	0.967	NA	NA	NA	NA
SE	Slc35b1:chr11:95385800-95385904:95386510-95386616:95387210-95387241:+	chr11:95386510-95386616	NA	NA	NA	NA	NA	NA	NA	NA	NA	NA	NA	NA	NA	NA	NA	NA	NA	NA	NA	0.991	NA	NA	NA	NA
SE	Qpct:chr17:79052187-79052388:79070672-79070951:79077481-79077658:+	chr17:79070672-79070951	NA	NA	NA	NA	NA	NA	NA	NA	NA	NA	NA	NA	NA	NA	0.983	NA	NA	NA	NA	NA	NA	NA	NA	NA
SE	Hunk:chr16:90475819-90475982:90481249-90481333:90487858-90487906:+	chr16:90481249-90481333	NA	NA	NA	NA	NA	NA	NA	NA	NA	NA	NA	NA	NA	NA	0.9	NA	NA	NA	NA	NA	NA	NA	NA	NA
SE	Rpap3:chr15:97691181-97691310:97693213-97693284:97694103-97694225:-	chr15:97693213-97693284	NA	NA	0.944	0.934	NA	NA	0.955	0.949	0.986	0.942	0.972	NA	NA	0.983	NA	NA	NA	0.966	NA	NA	NA	NA	0.981	0.963
SE	Cdk19:chr10:40436071-40436212:40454014-40454072:40469578-40469722:+	chr10:40454014-40454072	NA	NA	NA	NA	NA	NA	NA	NA	NA	NA	NA	NA	NA	NA	NA	NA	NA	NA	NA	NA	NA	NA	NA	0.59
SE	Rian:chr12:109637838-109637926:109643413-109643461:109645261-109645331:+	chr12:109643413-109643461	NA	0.872	NA	NA	NA	NA	NA	NA	NA	NA	NA	NA	NA	0.963	NA	NA	NA	NA	NA	NA	NA	NA	NA	NA
SE	Nsun3:chr16:62776221-62776631:62785787-62785897:62786670-62786713:-	chr16:62785787-62785897	NA	NA	NA	NA	NA	NA	NA	NA	NA	NA	NA	NA	NA	NA	0.916	NA	NA	NA	NA	NA	NA	NA	NA	NA
SE	Hnrnpd:chr5:99955934-99961333:99962514-99962612:99963983-99964083:-	chr5:99962514-99962612	NA	NA	0.983	NA	NA	NA	NA	NA	NA	NA	NA	NA	NA	NA	NA	NA	NA	NA	NA	NA	NA	NA	NA	NA
A3SS	9430015G10Rik:chr4:156122350-156122416:156121932-156122416:156119163-156119239:+	chr4:156121932-156122350	NA	NA	NA	NA	NA	NA	NA	NA	NA	NA	NA	0.88	NA	NA	NA	NA	NA	0.892	NA	NA	NA	NA	NA	NA
SE	Arnt:chr3:95483771-95483848:95484858-95484993:95487248-95487323:+	chr3:95484858-95484993	NA	NA	NA	NA	NA	0.973	NA	NA	NA	NA	NA	0.976	NA	NA	NA	NA	0.98	NA	NA	0.985	NA	NA	NA	NA
SE	Eml1:chr12:108502389-108502418:108503182-108503233:108506478-108506608:+	chr12:108503182-108503233	0.151	NA	0.058	0.034	0.058	0.021	0.049	0.022	0.025	0.087	0.08	0.015	0.037	0.033	0.094	NA	0.012	NA	0.012	0.067	0.014	0.051	0.049	0.014
SE	Zfp740:chr15:102204570-102204883:102205228-102205305:102207770-102207920:+	chr15:102205228-102205305	0.397	0.558	0.725	0.368	0.367	0.541	0.415	0.606	0.415	0.494	0.448	0.244	0.487	0.449	0.377	NA	0.465	0.397	0.452	0.27	0.424	0.594	0.371	0.578
SE	Ggta1:chr2:35423231-35423412:35432513-35432632:35462344-35463231:-	chr2:35432513-35432632	NA	NA	NA	NA	NA	NA	NA	0.983	0.974	NA	NA	NA	NA	0.985	NA	NA	0.982	NA	NA	0.967	NA	0.957	NA	0.975
A5SS	Tacc1:chr8:25182136-25182930:25181822-25182930:25177933-25177994:-	chr8:25181822-25182136	NA	NA	NA	NA	NA	NA	NA	NA	NA	0.967	NA	NA	NA	NA	NA	NA	NA	NA	NA	0.971	NA	NA	0.974	NA
A3SS	Ing3:chr6:21968917-21969004:21968884-21969004:21967626-21967698:+	chr6:21968884-21968917	0.88	NA	0.94	0.909	0.874	NA	0.968	NA	0.951	NA	0.888	NA	NA	NA	NA	NA	0.896	0.935	0.711	0.804	0.961	NA	0.946	NA
SE	Map3k2:chr18:32196839-32196958:32198650-32198691:32199938-32200038:+	chr18:32198650-32198691	NA	NA	NA	NA	NA	NA	NA	NA	NA	NA	NA	NA	NA	NA	NA	NA	NA	NA	NA	NA	0.926	NA	NA	NA
SE	Impdh1:chr6:29209219-29209268:29212068-29212170:29216071-29216342:-	chr6:29212068-29212170	0.899	NA	NA	NA	NA	NA	NA	NA	NA	NA	NA	NA	NA	NA	NA	NA	NA	NA	NA	NA	NA	NA	NA	NA
SE	Cenpa:chr5:30666911-30667113:30668998-30669052:30669691-30669828:+	chr5:30668998-30669052	NA	NA	NA	NA	0.595	NA	0.344	NA	NA	NA	NA	0.136	0.191	0.03	NA	NA	NA	NA	NA	0.048	NA	NA	0.046	NA
RI	Tardbp:chr4:148612381-148617705:148612381-148618791:148618646-148618791:-	chr4:148617705-148618646	0.995	0.983	0.982	0.978	0.995	0.995	0.978	0.978	0.994	NA	NA	0.996	NA	0.971	0.95	0.812	0.994	NA	0.986	NA	NA	NA	NA	0.988
SE	Ube4a:chr9:44959978-44960139:44963336-44963432:44965484-44965549:-	chr9:44963336-44963432	0.99	0.959	0.84	0.885	0.919	0.864	0.931	0.838	0.891	0.963	NA	0.982	0.927	0.742	0.851	0.91	0.96	0.898	0.951	0.911	0.847	0.908	0.902	0.87
A3SS	Map4k2:chr19:6353277-6353333:6353260-6353333:6353119-6353190:+	chr19:6353260-6353277	NA	NA	NA	NA	0.159	NA	0.163	0.052	NA	0.152	NA	0.082	NA	0.161	NA	NA	NA	NA	NA	NA	0.13	0.078	0.071	NA
RI	Phf1:chr17:26936286-26936391:26936286-26936680:26936522-26936680:+	chr17:26936391-26936522	0.419	0.47	0.151	0.281	0.525	0.294	0.415	0.378	0.482	0.176	0.516	0.262	0.615	0.347	0.25	NA	NA	0.257	0.21	0.505	0.138	0.464	0.378	0.615
SE	Orc6:chr8:85299688-85299992:85302795-85302959:85303361-85303451:+	chr8:85302795-85302959	NA	NA	NA	NA	NA	NA	NA	NA	NA	NA	NA	NA	NA	NA	NA	NA	0.942	0.96	NA	NA	NA	NA	NA	NA
A5SS	Snhg5:chr9:88522850-88522888:88522306-88522888:88521917-88521975:-	chr9:88522306-88522850	NA	0.972	NA	NA	NA	NA	NA	NA	NA	NA	NA	NA	NA	NA	NA	NA	NA	NA	NA	NA	NA	NA	NA	NA
SE	Caap1:chr4:94521061-94521135:94549118-94549194:94550421-94550506:-	chr4:94549118-94549194	NA	NA	NA	NA	NA	0.971	NA	NA	NA	NA	NA	NA	0.978	NA	NA	NA	NA	NA	NA	NA	NA	NA	NA	NA
SE	Ube2j2:chr4:155955421-155955560:155956367-155956448:155957080-155957101:+	chr4:155956367-155956448	NA	0.993	NA	NA	0.99	0.986	NA	NA	NA	0.978	NA	0.954	NA	NA	NA	NA	NA	0.99	0.991	NA	NA	NA	0.993	NA
A3SS	Banp:chr8:121978601-121978754:121978554-121978754:121975899-121975991:+	chr8:121978554-121978601	NA	0.982	0.952	NA	0.889	0.986	0.906	NA	0.93	NA	0.879	NA	NA	0.938	NA	NA	NA	NA	NA	0.948	0.982	0.984	NA	NA
SE	Hdac2:chr10:36985126-36985239:36986306-36986424:36988079-36988154:+	chr10:36986306-36986424	NA	NA	NA	NA	0.994	NA	NA	NA	NA	NA	NA	NA	NA	0.992	0.997	NA	0.994	NA	NA	0.997	NA	NA	0.997	NA
A5SS	Lrrc14:chr15:76710642-76710927:76710642-76711530:76712866-76713220:+	chr15:76710927-76711530	0.158	0.201	0.15	0.135	0.125	0.185	0.159	0.162	0.204	0.083	0.229	0.195	0.238	0.121	0.105	0.685	0.109	0.232	0.251	0.16	0.251	0.135	0.108	0.122
SE	Pcm1:chr8:41261010-41261181:41261359-41261476:41267186-41267364:+	chr8:41261359-41261476	0.428	0.719	0.765	0.554	0.51	0.709	0.587	0.606	0.433	0.791	0.578	0.629	0.519	0.476	0.787	0.824	0.599	0.537	0.429	0.558	0.669	0.745	0.643	0.821
SE	Myo18a:chr11:77853751-77853891:77857722-77857845:77864690-77864837:+	chr11:77857722-77857845	NA	NA	NA	NA	NA	NA	NA	NA	NA	NA	NA	NA	NA	0.956	NA	NA	NA	NA	NA	NA	NA	NA	NA	NA
SE	Fbn1:chr2:125394611-125394770:125397777-125397903:125403103-125403229:-	chr2:125397777-125397903	NA	NA	NA	NA	NA	NA	0.996	NA	NA	NA	NA	NA	NA	NA	NA	NA	NA	NA	NA	NA	NA	NA	NA	NA
A3SS	Stab2:chr10:86856545-86856739:86856545-86856742:86858107-86858215:-	chr10:86856739-86856742	NA	0.197	NA	NA	NA	NA	NA	NA	NA	NA	NA	NA	NA	NA	NA	NA	NA	NA	NA	NA	NA	NA	NA	NA
SE	Sugp2:chr8:70260441-70260589:70261230-70261317:70262870-70263105:+	chr8:70261230-70261317	0.951	NA	0.967	0.915	NA	NA	NA	NA	0.863	NA	NA	NA	0.964	NA	NA	NA	NA	0.927	NA	0.857	NA	NA	NA	NA
SE	Etfrf1:chr6:145211155-145211252:145215183-145215271:145215350-145215771:+	chr6:145215183-145215271	0.98	NA	0.989	NA	0.991	0.98	0.993	0.98	0.99	NA	NA	NA	0.971	NA	NA	NA	0.96	NA	NA	NA	NA	NA	NA	NA
RI	Brinp2:chr1:158266461-158266670:158266461-158268020:158267829-158268020:-	chr1:158266670-158267829	0.132	NA	NA	NA	NA	NA	0.186	NA	NA	NA	NA	NA	NA	NA	NA	NA	NA	NA	NA	NA	NA	NA	NA	NA
SE	Rabgap1:chr2:37502867-37502961:37508927-37509078:37532515-37532629:+	chr2:37508927-37509078	NA	NA	0.991	NA	NA	NA	NA	NA	NA	NA	NA	NA	NA	NA	NA	NA	NA	NA	NA	NA	NA	NA	NA	NA
SE	Ecpas:chr4:58826401-58826470:58827036-58827151:58828007-58828062:-	chr4:58827036-58827151	NA	NA	NA	NA	NA	NA	NA	NA	NA	NA	NA	NA	NA	0.974	NA	NA	NA	NA	NA	NA	NA	NA	NA	NA
SE	Atp11a:chr8:12757013-12757352:12806649-12806772:12812311-12812401:+	chr8:12806649-12806772	NA	NA	NA	NA	NA	NA	NA	NA	NA	NA	NA	NA	NA	NA	NA	NA	0.994	NA	NA	NA	NA	NA	NA	NA
SE	Hps1:chr19:42765912-42765982:42766129-42766216:42766685-42766833:-	chr19:42766129-42766216	0.965	NA	NA	NA	NA	0.866	NA	NA	NA	NA	0.791	NA	NA	NA	NA	NA	NA	NA	NA	NA	NA	NA	NA	NA
SE	Stt3b:chr9:115266093-115266193:115267309-115267375:115276703-115276991:-	chr9:115267309-115267375	NA	NA	NA	0.995	NA	NA	NA	NA	NA	NA	NA	NA	NA	NA	NA	NA	NA	NA	NA	NA	NA	NA	NA	NA
SE	Ghr:chr15:3457929-3458008:3551532-3551685:3582257-3582596:-	chr15:3551532-3551685	0.182	NA	NA	NA	0.029	NA	NA	0.076	NA	NA	NA	0.233	NA	NA	NA	NA	NA	NA	NA	0.066	0.083	NA	NA	NA
SE	Dnmt3a:chr12:3902665-3902814:3904139-3904225:3905592-3905662:+	chr12:3904139-3904225	NA	NA	NA	NA	NA	NA	NA	NA	NA	NA	NA	NA	0.966	NA	NA	NA	NA	NA	NA	NA	NA	NA	NA	NA
RI	Asic3:chr5:24417494-24417553:24417494-24417834:24417667-24417834:+	chr5:24417553-24417667	NA	0.799	0.362	NA	NA	0.773	NA	0.459	NA	NA	NA	NA	NA	NA	NA	NA	0.221	0.415	NA	NA	NA	NA	0.586	NA
SE	Zfp51:chr17:21452436-21452527:21456296-21456388:21461660-21461787:+	chr17:21456296-21456388	NA	0.894	NA	NA	NA	NA	NA	NA	NA	NA	NA	NA	NA	0.819	NA	NA	0.788	NA	NA	NA	NA	NA	NA	NA
SE	Sec61a2:chr2:5881807-5882690:5882817-5882949:5886498-5886577:-	chr2:5882817-5882949	NA	NA	NA	NA	NA	NA	NA	NA	NA	NA	0.965	NA	NA	NA	NA	NA	NA	NA	NA	NA	NA	NA	NA	NA
SE	Rap1gap2:chr11:74412296-74412452:74414390-74414520:74416231-74416332:-	chr11:74414390-74414520	NA	NA	NA	NA	NA	NA	NA	NA	NA	NA	NA	NA	NA	NA	NA	NA	NA	NA	NA	NA	NA	0.978	NA	NA
SE	Ncor1:chr11:62345234-62345318:62349394-62349493:62351377-62351390:-	chr11:62349394-62349493	0.403	0.685	0.697	0.588	0.64	0.563	0.551	0.649	0.597	0.531	0.462	0.298	0.375	0.732	0.688	NA	0.613	0.6	0.824	0.428	0.382	0.779	0.681	0.577
A3SS	Hps5:chr7:46783470-46783683:46783470-46783717:46786509-46786643:-	chr7:46783683-46783717	0.069	0.017	0.071	0.075	NA	0.03	0.034	0.064	0.019	0.025	0.053	0.023	0.04	0.1	0.104	NA	0.042	NA	0.041	0.078	0.289	0.062	0.065	0.11
SE	Zfp346:chr13:55113677-55113770:55115479-55115624:55122329-55122515:+	chr13:55115479-55115624	NA	0.941	NA	0.944	0.964	0.975	0.923	NA	0.923	0.94	NA	0.923	NA	NA	0.948	NA	0.98	NA	NA	0.928	NA	0.948	NA	NA
SE	Acin1:chr14:54651716-54651858:54653213-54653278:54653534-54653682:-	chr14:54653213-54653278	0.69	0.41	0.549	0.303	0.777	0.572	0.524	0.448	0.347	0.798	0.614	0.465	0.376	0.676	0.351	0.436	0.655	0.197	0.939	0.613	0.686	0.582	0.367	0.534
A3SS	9030025P20Rik:chr17:14986717-14986832:14985773-14986832:14984817-14984915:+	chr17:14985773-14986717	0.064	NA	NA	NA	NA	NA	NA	NA	NA	NA	NA	NA	NA	NA	NA	NA	NA	NA	NA	NA	NA	NA	NA	NA
SE	Pold1:chr7:44537991-44538105:44538326-44538443:44538603-44538692:-	chr7:44538326-44538443	NA	NA	NA	NA	NA	NA	NA	0.898	NA	NA	NA	NA	NA	NA	NA	NA	NA	NA	NA	NA	NA	NA	NA	NA
SE	Fn1:chr1:71637251-71637395:71638456-71638585:71640291-71640444:-	chr1:71638456-71638585	NA	NA	NA	NA	0.998	NA	NA	NA	NA	NA	NA	NA	NA	NA	NA	NA	NA	NA	NA	NA	NA	NA	1	NA
SE	Eml6:chr11:29784063-29784240:29785666-29785755:29791972-29792104:-	chr11:29785666-29785755	NA	NA	NA	NA	NA	NA	NA	NA	NA	NA	NA	0.914	NA	NA	NA	NA	NA	NA	NA	NA	NA	NA	NA	NA
SE	4930402H24Rik:chr2:130713396-130713503:130717260-130717347:130719839-130719929:-	chr2:130717260-130717347	NA	NA	NA	NA	NA	NA	NA	NA	NA	0.946	0.985	NA	NA	NA	NA	NA	NA	NA	NA	NA	NA	NA	NA	0.958
SE	Cfap57:chr4:118592997-118593171:118595752-118595965:118598956-118599070:-	chr4:118595752-118595965	NA	NA	NA	NA	NA	NA	NA	NA	NA	NA	NA	NA	NA	NA	NA	NA	NA	NA	NA	NA	0.452	NA	NA	NA
SE	Tango2:chr16:18322420-18324450:18338608-18339077:18343894-18343914:-	chr16:18338608-18339077	0.42	0.116	NA	0.138	0.046	0.194	NA	0.325	NA	NA	0.659	NA	0.108	0.275	0.051	NA	NA	0.628	0.266	0.046	0.325	0.031	0.026	NA
SE	Prrc2a:chr17:35149699-35149794:35149908-35150121:35150227-35150326:-	chr17:35149908-35150121	NA	NA	NA	NA	0.992	0.991	0.991	NA	0.993	NA	0.99	NA	NA	NA	NA	NA	NA	NA	NA	0.993	NA	NA	NA	NA
SE	A830052D11Rik:chr18:32359052-32359435:32371429-32371583:32377687-32377823:-	chr18:32371429-32371583	NA	NA	NA	0.496	NA	NA	NA	NA	NA	NA	NA	NA	NA	NA	NA	NA	NA	NA	NA	NA	NA	NA	NA	NA
RI	Glt8d1:chr14:31010863-31011030:31010863-31011233:31011120-31011233:+	chr14:31011030-31011120	0.106	0.106	0.161	0.19	0.14	0.113	0.139	0.079	0.078	0.041	0.072	0.07	0.093	0.086	0.073	0.142	0.164	0.084	0.164	0.123	0.136	0.21	0.075	0.257
SE	Mbd5:chr2:49018253-49018325:49086589-49086652:49099716-49099809:+	chr2:49086589-49086652	0.941	0.668	0.76	0.89	0.859	0.901	0.771	0.839	0.863	0.535	0.714	0.537	0.849	0.576	0.501	NA	0.701	0.715	0.901	0.688	0.838	0.496	0.513	0.584
SE	Snhg5:chr9:88521049-88521448:88521649-88521716:88521917-88521975:-	chr9:88521649-88521716	NA	NA	NA	NA	NA	NA	NA	NA	NA	NA	NA	NA	NA	NA	NA	NA	NA	NA	NA	NA	NA	NA	NA	0.921
SE	Swt1:chr1:151388619-151388768:151391435-151391574:151394608-151394772:-	chr1:151391435-151391574	NA	NA	NA	NA	NA	NA	NA	NA	0.945	NA	NA	NA	NA	NA	NA	NA	NA	0.945	NA	NA	NA	NA	NA	NA
SE	Gm32856:chr8:129263647-129263724:129267484-129267699:129281022-129281149:+	chr8:129267484-129267699	NA	NA	NA	0.551	NA	NA	NA	NA	NA	NA	NA	NA	NA	NA	0.391	NA	NA	NA	NA	NA	NA	NA	NA	0.38
SE	Jmjd1c:chr10:67224008-67224181:67224736-67226919:67229847-67230049:+	chr10:67224736-67226919	NA	NA	NA	NA	NA	NA	NA	NA	NA	NA	NA	NA	NA	NA	0.965	NA	NA	NA	NA	NA	NA	NA	NA	NA
SE	Ubn1:chr16:5076891-5078115:5081417-5081661:5084055-5086289:+	chr16:5081417-5081661	NA	NA	0.98	NA	NA	NA	NA	NA	NA	NA	NA	NA	NA	NA	NA	NA	NA	NA	NA	NA	NA	NA	NA	NA
SE	Plekhg1:chr10:3952310-3952333:3956545-3958205:3963400-3964333:+	chr10:3956545-3958205	NA	0.986	0.984	NA	NA	NA	NA	NA	NA	NA	NA	NA	NA	NA	0.944	NA	0.965	NA	NA	NA	NA	NA	NA	NA
SE	Asph:chr4:9542224-9542310:9583811-9583856:9635900-9635969:-	chr4:9583811-9583856	0.754	NA	0.942	NA	NA	0.865	NA	NA	NA	NA	NA	0.957	NA	0.967	NA	NA	NA	NA	NA	NA	NA	NA	NA	NA
SE	Gigyf2:chr1:87326997-87327092:87334269-87334334:87354403-87354486:+	chr1:87334269-87334334	NA	0.984	0.963	0.965	0.94	0.935	NA	0.928	0.964	0.978	NA	0.915	NA	0.979	NA	NA	0.925	NA	NA	0.938	NA	NA	NA	0.819
SE	Gripap1:chrX:7812464-7812560:7812681-7812738:7812831-7812931:+	chrX:7812681-7812738	NA	NA	NA	NA	NA	NA	NA	NA	NA	NA	NA	NA	NA	NA	NA	NA	NA	NA	NA	NA	0.96	NA	NA	NA
SE	Sik3:chr9:46127009-46127073:46155378-46155540:46177871-46177996:+	chr9:46155378-46155540	NA	NA	NA	NA	NA	NA	NA	NA	NA	NA	NA	NA	NA	NA	NA	NA	NA	NA	0.929	NA	NA	NA	NA	0.979
SE	Zfp618:chr4:63089365-63089443:63090004-63090043:63094431-63094521:+	chr4:63090004-63090043	NA	NA	NA	0.744	NA	NA	NA	NA	NA	NA	NA	NA	NA	NA	NA	NA	NA	NA	NA	NA	NA	NA	NA	NA
SE	Vps26a:chr10:62471059-62471135:62480557-62480707:62486657-62486732:-	chr10:62480557-62480707	0.991	0.946	0.894	NA	0.974	0.986	0.97	NA	0.954	NA	0.99	NA	NA	0.987	0.894	0.888	0.915	0.969	0.944	0.989	NA	0.945	0.988	0.929
SE	Snapc4:chr2:26378020-26378067:26378160-26378279:26378493-26378636:-	chr2:26378160-26378279	0.161	0.047	0.041	NA	0.028	0.058	NA	0.176	0.044	0.088	0.1	0.156	0.036	0.065	NA	NA	0.083	0.162	NA	NA	0.044	0.04	0.186	0.135
SE	Fxyd1:chr7:31052127-31052177:31053399-31053474:31053892-31053925:-	chr7:31053399-31053474	0.985	NA	NA	NA	0.988	0.992	0.993	0.98	NA	NA	NA	NA	NA	NA	NA	NA	NA	NA	NA	NA	NA	NA	NA	NA
A3SS	Tardbp:chr4:148617565-148617705:148617565-148617742:148618737-148618791:-	chr4:148617705-148617742	NA	NA	NA	NA	0.955	NA	NA	NA	NA	NA	0.961	NA	NA	NA	NA	NA	NA	NA	NA	NA	NA	NA	NA	NA
SE	Slc16a2:chrX:103697413-103699967:103701491-103701720:103706251-103706395:-	chrX:103701491-103701720	NA	NA	NA	0.98	0.987	NA	NA	NA	0.985	NA	NA	NA	NA	NA	NA	NA	NA	NA	NA	NA	NA	NA	NA	NA
SE	Slc26a8:chr17:28659592-28659675:28661864-28662014:28669902-28670084:-	chr17:28661864-28662014	NA	NA	NA	NA	NA	NA	NA	NA	NA	NA	NA	NA	NA	0.199	NA	NA	NA	NA	NA	NA	NA	NA	NA	NA
SE	Bptf:chr11:107043632-107043825:107044491-107044665:107046999-107047343:-	chr11:107044491-107044665	0.437	0.361	0.329	0.498	0.649	0.47	0.594	0.54	0.571	0.438	0.598	0.418	0.633	0.747	0.344	NA	0.426	0.609	0.464	0.495	0.573	0.442	0.563	0.321
SE	Fut8:chr12:77277360-77277455:77323844-77323937:77331895-77332329:+	chr12:77323844-77323937	0.777	0.772	0.732	0.849	0.77	0.759	0.792	0.69	0.714	0.841	0.829	0.88	0.766	0.857	0.668	0.826	0.674	0.711	0.821	0.737	0.889	0.66	0.853	0.667
SE	N4bp2:chr5:65786105-65786361:65788052-65788141:65790017-65791170:+	chr5:65788052-65788141	0.467	0.122	0.715	0.569	0.433	0.255	0.715	0.484	0.268	0.429	0.455	0.455	0.385	0.484	NA	0.32	0.61	0.273	NA	0.152	0.61	0.61	0.309	NA
SE	Cul1:chr6:47501167-47501218:47501698-47501789:47502426-47502590:+	chr6:47501698-47501789	NA	NA	NA	NA	NA	NA	NA	NA	NA	NA	NA	NA	NA	NA	NA	NA	NA	NA	NA	NA	0.987	NA	NA	NA
SE	4930453N24Rik:chr16:64762135-64766993:64768923-64769162:64770736-64771161:-	chr16:64768923-64769162	NA	NA	NA	NA	NA	NA	NA	NA	0.986	NA	0.967	NA	NA	NA	NA	NA	NA	NA	NA	NA	NA	NA	0.957	NA
SE	Wnk1:chr6:119929832-119929867:119932689-119932761:119934255-119934329:-	chr6:119932689-119932761	0.729	0.088	0.844	0.83	NA	NA	NA	NA	0.618	0.31	NA	NA	NA	NA	0.371	NA	0.403	NA	NA	0.876	0.447	NA	NA	0.89
SE	Lhpp:chr7:132610707-132610830:132634000-132634154:132641523-132641567:+	chr7:132634000-132634154	0.912	NA	0.821	NA	NA	0.831	NA	NA	0.707	NA	NA	NA	NA	NA	NA	NA	NA	NA	NA	NA	NA	0.914	NA	NA
A3SS	Zfp426:chr9:20478132-20478254:20478132-20478279:20486329-20486437:-	chr9:20478254-20478279	0.213	0.157	0.1	0.102	0.44	0.084	0.318	0.037	0.129	0.105	0.229	NA	0.171	0.176	0.052	0.609	0.032	NA	0.048	0.183	0.058	0.109	0.102	0.072
A5SS	Dixdc1:chr9:50710842-50710972:50710764-50710972:50706124-50706250:-	chr9:50710764-50710842	NA	NA	NA	NA	0.099	0.344	0.052	NA	NA	0.396	NA	0.141	0.158	NA	NA	NA	NA	NA	NA	NA	NA	NA	NA	NA
A3SS	Armc9:chr1:86262041-86262165:86262038-86262165:86257225-86257362:+	chr1:86262038-86262041	NA	0.62	NA	NA	0.246	NA	NA	0.595	0.595	NA	0.38	0.329	NA	0.495	NA	NA	NA	NA	NA	NA	0.662	NA	0.424	NA
SE	Styx:chr14:45354945-45354978:45356712-45356766:45366598-45366659:+	chr14:45356712-45356766	NA	NA	NA	NA	NA	NA	0.794	NA	NA	NA	NA	NA	NA	NA	NA	NA	NA	NA	NA	NA	NA	NA	NA	NA
SE	Gphn:chr12:78492037-78492310:78493949-78494057:78504616-78504751:+	chr12:78493949-78494057	NA	0.982	NA	0.973	NA	0.886	0.987	0.922	NA	NA	NA	0.967	NA	0.864	NA	NA	NA	NA	NA	0.972	NA	NA	0.975	NA
SE	Ago2:chr15:73137992-73138113:73146369-73146565:73184760-73184935:-	chr15:73146369-73146565	NA	NA	NA	NA	NA	NA	NA	NA	NA	NA	NA	NA	NA	0.985	NA	NA	NA	NA	NA	NA	NA	NA	NA	NA
SE	Slc35a2:chrX:7884332-7884433:7885748-7885892:7889611-7889763:+	chrX:7885748-7885892	NA	0.935	NA	NA	0.98	NA	0.961	NA	NA	NA	NA	NA	NA	NA	NA	NA	NA	NA	NA	NA	NA	NA	NA	0.985
A3SS	Map2:chr1:66401446-66401521:66401443-66401521:66399388-66399502:+	chr1:66401443-66401446	NA	NA	0.495	NA	NA	NA	NA	NA	NA	NA	NA	0.797	NA	NA	NA	NA	NA	NA	NA	NA	NA	NA	NA	NA
SE	Eif4a2:chr16:23111816-23111896:23112350-23112457:23113166-23113184:+	chr16:23112350-23112457	0.076	0.08	0.068	0.095	0.075	0.066	0.085	0.07	0.101	0.083	0.102	0.079	0.091	0.099	0.068	0.066	0.076	0.08	0.107	0.11	0.096	0.064	0.069	0.085
SE	Usp48:chr4:137613681-137613861:137615712-137615841:137616357-137616507:+	chr4:137615712-137615841	NA	NA	NA	NA	NA	0.987	NA	0.97	NA	NA	NA	NA	NA	0.99	0.973	NA	NA	NA	NA	NA	NA	NA	NA	NA
SE	Aco2:chr15:81872308-81872548:81889297-81889434:81895169-81895281:+	chr15:81889297-81889434	NA	NA	NA	NA	NA	NA	0.999	NA	0.993	NA	NA	NA	NA	NA	0.995	NA	0.994	NA	NA	NA	NA	NA	NA	NA
A5SS	Neurl4:chr11:69906225-69906295:69906225-69906407:69906517-69906603:+	chr11:69906295-69906407	NA	0.967	0.987	0.965	NA	0.962	NA	NA	0.835	0.946	NA	0.953	0.947	NA	NA	NA	NA	0.972	NA	0.967	0.968	NA	0.929	NA
SE	Ptprk:chr10:28334475-28334557:28336421-28336537:28354604-28354779:+	chr10:28336421-28336537	NA	NA	NA	NA	NA	NA	NA	NA	NA	NA	NA	NA	NA	NA	NA	NA	NA	0.975	NA	NA	NA	NA	NA	NA
SE	Dnmbp:chr19:43870161-43870309:43874127-43874257:43874826-43875020:-	chr19:43874127-43874257	NA	NA	NA	NA	NA	NA	NA	NA	0.595	NA	NA	NA	NA	NA	NA	NA	NA	NA	NA	NA	NA	NA	NA	NA
SE	Elovl6:chr3:129605040-129605172:129628282-129628434:129633059-129633437:+	chr3:129628282-129628434	0.982	0.95	0.912	0.964	0.967	0.925	0.978	NA	NA	0.826	0.949	NA	NA	NA	0.97	NA	0.922	NA	0.972	0.966	0.968	0.932	NA	NA
A3SS	Ybx1:chr4:119278933-119279199:119278933-119279211:119281569-119281652:-	chr4:119279199-119279211	0.054	0.076	0.062	0.057	0.073	0.069	0.058	0.103	0.058	0.057	0.069	0.069	0.069	0.044	0.067	0.063	0.069	0.101	0.054	0.071	0.076	0.061	0.058	0.058
SE	Nfia:chr4:98065280-98065446:98081724-98081816:98111217-98118871:+	chr4:98081724-98081816	0.704	0.932	0.881	0.707	0.811	0.756	0.782	0.629	0.771	0.836	0.573	0.712	0.918	0.751	NA	NA	0.832	0.694	0.788	0.667	0.785	0.67	0.753	0.778
SE	Hsd11b1:chr1:193221633-193222228:193223621-193223765:193240230-193240416:-	chr1:193223621-193223765	NA	NA	0.998	NA	NA	NA	NA	NA	NA	NA	NA	NA	NA	NA	0.99	NA	0.997	NA	0.997	NA	NA	NA	NA	0.996
SE	Srsf1:chr11:88049042-88049215:88049411-88049598:88049976-88050410:+	chr11:88049411-88049598	NA	NA	0.991	0.983	0.974	0.994	0.982	NA	0.994	0.994	NA	0.977	0.98	NA	NA	NA	0.992	0.994	0.984	0.968	NA	0.973	NA	0.985
SE	Nmt2:chr2:3306982-3307032:3309466-3309611:3312455-3312574:+	chr2:3309466-3309611	NA	NA	0.99	NA	NA	0.952	0.969	NA	NA	NA	NA	NA	NA	NA	NA	NA	NA	NA	NA	NA	NA	NA	NA	NA
SE	Asb3:chr11:31058821-31058999:31061388-31061586:31081361-31081622:+	chr11:31061388-31061586	NA	NA	0.953	NA	NA	NA	NA	NA	NA	NA	NA	NA	NA	NA	NA	NA	NA	NA	NA	NA	NA	NA	NA	NA
RI	Sorbs1:chr19:40376644-40376803:40376644-40377016:40376983-40377016:-	chr19:40376803-40376983	0.838	0.807	0.786	0.784	0.859	0.81	0.802	0.754	0.794	0.96	0.831	0.85	0.837	0.863	0.845	NA	0.838	0.923	0.674	0.834	0.816	0.732	0.913	0.772
A3SS	Zc3h13:chr14:75335924-75336074:75335921-75336074:75331705-75332218:+	chr14:75335921-75335924	0.735	0.599	0.556	0.504	0.589	0.512	0.559	0.384	0.571	0.691	0.662	0.642	0.422	0.482	0.381	0.603	0.61	0.595	0.702	0.578	0.746	0.619	0.524	0.609
RI	Sptan1:chr2:30029619-30029674:30029619-30030196:30029999-30030196:+	chr2:30029674-30029999	0.041	0.03	0.051	0.038	0.023	0.046	0.029	0.024	0.026	0.041	0.023	0.052	0.029	0.046	0.042	0.031	0.027	0.03	0.037	0.033	0.036	0.029	0.041	0.034
A5SS	Aamp:chr1:74281526-74281642:74281328-74281642:74281088-74281179:-	chr1:74281328-74281526	NA	NA	NA	NA	NA	0.991	NA	NA	NA	NA	0.989	NA	NA	0.995	NA	NA	NA	NA	NA	0.99	NA	NA	0.995	NA
SE	Ranbp17:chr11:33329470-33329544:33337854-33337914:33441802-33441938:-	chr11:33337854-33337914	NA	NA	NA	0.192	0.416	NA	0.263	NA	NA	NA	0.416	NA	0.125	NA	NA	NA	NA	NA	0.192	NA	0.363	NA	0.517	NA
SE	Idua:chr5:108669105-108669517:108670118-108670259:108679498-108679584:+	chr5:108670118-108670259	NA	NA	NA	NA	NA	NA	0.931	NA	0.977	NA	NA	NA	NA	NA	NA	NA	NA	NA	NA	NA	NA	NA	NA	0.928
SE	Golgb1:chr16:36885010-36885188:36886130-36886228:36887238-36887403:+	chr16:36886130-36886228	0.62	0.49	0.46	0.556	0.512	0.613	0.605	0.668	0.455	0.58	0.441	0.538	0.64	0.575	0.472	0.609	0.45	0.54	0.638	0.414	0.703	0.395	0.644	0.44
SE	Gm6483:chr8:19691520-19691640:19693550-19693718:19697503-19697736:+	chr8:19693550-19693718	NA	NA	NA	NA	NA	NA	NA	NA	NA	0.19	NA	NA	0.876	NA	NA	NA	NA	NA	NA	NA	NA	NA	NA	NA
SE	Ecpas:chr4:58809681-58809725:58810615-58810824:58811370-58811562:-	chr4:58810615-58810824	NA	NA	NA	NA	NA	NA	0.987	0.985	0.992	NA	NA	NA	NA	NA	NA	NA	NA	0.992	NA	NA	NA	NA	NA	NA
SE	Selenoi:chr5:30247462-30247531:30252709-30252784:30256077-30256340:+	chr5:30252709-30252784	NA	NA	NA	NA	NA	NA	NA	NA	NA	NA	NA	NA	NA	NA	NA	NA	NA	NA	NA	NA	NA	0.966	NA	NA
SE	Prdx6:chr1:161244195-161244342:161247256-161247413:161250756-161251166:-	chr1:161247256-161247413	NA	0.999	NA	0.994	NA	NA	NA	NA	NA	NA	NA	NA	NA	NA	0.999	NA	0.994	NA	NA	NA	NA	0.999	NA	0.997
SE	Ccar1:chr10:62783233-62783266:62783882-62783927:62785430-62785594:-	chr10:62783882-62783927	NA	NA	NA	NA	NA	NA	NA	NA	NA	NA	NA	NA	NA	NA	NA	NA	NA	NA	NA	NA	NA	NA	NA	0.993
A5SS	Setd2:chr9:110561115-110561239:110561115-110561248:110562936-110563014:+	chr9:110561239-110561248	0.019	0.022	0.039	NA	0.027	NA	0.028	0.035	NA	NA	0.041	0.02	NA	0.027	0.053	0.101	0.049	NA	0.045	0.038	0.042	NA	0.007	NA
RI	Hmgxb3:chr18:61157342-61157518:61157342-61157761:61157614-61157761:-	chr18:61157518-61157614	0.835	0.575	0.549	0.698	0.626	0.542	0.566	0.481	0.549	0.688	0.713	0.523	0.541	0.77	0.492	NA	0.552	0.775	0.3	0.905	0.461	0.649	0.496	0.51
SE	Zfp644:chr5:106666784-106666845:106681903-106682013:106695642-106695699:-	chr5:106681903-106682013	NA	NA	NA	NA	NA	NA	NA	NA	NA	0.697	NA	NA	NA	NA	NA	NA	0.161	NA	NA	NA	NA	NA	NA	NA
SE	Pbxip1:chr3:89446279-89446411:89447045-89448265:89448672-89450952:+	chr3:89447045-89448265	NA	NA	NA	NA	NA	NA	0.981	0.992	NA	NA	NA	NA	NA	0.997	NA	NA	NA	NA	NA	NA	NA	NA	0.992	NA
SE	Psmd13:chr7:140889304-140889476:140890331-140890411:140890494-140890620:+	chr7:140890331-140890411	NA	NA	NA	NA	NA	NA	NA	NA	NA	NA	NA	NA	NA	NA	NA	NA	NA	NA	NA	NA	NA	NA	NA	0.995
SE	Hectd1:chr12:51806361-51806596:51827351-51827513:51829202-51829536:-	chr12:51827351-51827513	NA	NA	0.982	0.989	NA	0.989	NA	NA	NA	NA	NA	0.989	0.988	0.981	NA	0.912	0.979	0.99	NA	NA	0.931	0.992	NA	NA
SE	Trpm7:chr2:126822469-126822748:126823975-126824104:126825411-126825555:-	chr2:126823975-126824104	NA	NA	0.967	NA	0.988	NA	NA	0.969	NA	NA	NA	NA	NA	NA	NA	NA	NA	NA	NA	NA	NA	0.95	0.974	NA
SE	Zmynd12:chr4:119433949-119434091:119437079-119437251:119441748-119441918:+	chr4:119437079-119437251	NA	NA	NA	NA	NA	NA	NA	NA	NA	0.317	NA	NA	NA	NA	NA	NA	NA	NA	NA	NA	NA	NA	NA	NA
SE	Gm46430:chr13:74610199-74610326:74612723-74612948:74617201-74617310:-	chr13:74612723-74612948	NA	0.673	0.909	0.94	0.895	0.881	0.944	NA	NA	0.952	0.774	NA	0.749	NA	NA	NA	0.927	0.925	0.544	NA	0.859	0.933	NA	0.923
SE	Epn2:chr11:61535270-61535383:61546149-61546911:61579566-61579685:-	chr11:61546149-61546911	0.959	NA	NA	NA	0.972	0.978	0.882	NA	NA	NA	NA	NA	NA	NA	NA	NA	NA	NA	NA	0.98	NA	0.955	NA	0.949
SE	Ube2d-ps:chr11:5768885-5769072:5769166-5769243:5780205-5780311:+	chr11:5769166-5769243	NA	NA	NA	NA	NA	NA	0.497	NA	NA	NA	NA	NA	NA	NA	NA	0.358	NA	NA	NA	NA	NA	NA	NA	NA
SE	Fam120a:chr13:48885736-48885878:48889123-48889261:48889754-48889938:-	chr13:48889123-48889261	NA	0.993	NA	NA	NA	NA	NA	0.994	NA	NA	NA	NA	NA	0.985	0.997	0.675	NA	NA	NA	NA	NA	NA	NA	NA
SE	Kif5b:chr18:6226863-6226968:6227587-6227661:6234814-6234902:-	chr18:6227587-6227661	NA	NA	NA	0.967	NA	NA	NA	NA	NA	NA	NA	NA	NA	NA	NA	NA	NA	NA	NA	NA	NA	NA	NA	NA
SE	Cul1:chr6:47520792-47520885:47523077-47523125:47523203-47523286:+	chr6:47523077-47523125	NA	NA	NA	NA	NA	NA	NA	NA	NA	NA	NA	NA	0.938	NA	NA	NA	NA	NA	NA	NA	NA	NA	NA	NA
SE	Zeb1:chr18:5593860-5593919:5633203-5633357:5641381-5641385:+	chr18:5633203-5633357	NA	NA	0.887	NA	0.887	NA	NA	NA	0.905	NA	NA	NA	NA	NA	NA	NA	NA	NA	NA	NA	NA	NA	NA	NA
SE	Fgfrl1:chr5:108694229-108694532:108695037-108695118:108703285-108703339:+	chr5:108695037-108695118	0.992	0.967	0.991	0.993	0.995	NA	NA	NA	NA	NA	0.997	NA	NA	0.986	0.993	NA	NA	NA	NA	0.993	NA	NA	NA	0.97
RI	Ctu2:chr8:122478892-122479194:122478892-122479412:122479276-122479412:+	chr8:122479194-122479276	0.061	0.007	0.033	0.106	0.037	0.099	0.008	0.045	NA	0.031	0.042	0.015	0.018	0.04	0.024	NA	0.064	0.062	0.011	0.012	0.067	0.031	0.048	0.042
SE	Rcbtb1:chr14:59201233-59201584:59205624-59205722:59209924-59209971:+	chr14:59205624-59205722	NA	NA	NA	NA	NA	0.077	0.108	0.1	NA	NA	0.014	0.137	NA	NA	NA	NA	0.1	0.108	0.184	NA	0.108	NA	NA	0.105
RI	Dvl1:chr4:155854565-155854800:155854565-155855180:155855103-155855180:+	chr4:155854800-155855103	NA	NA	NA	NA	NA	NA	NA	NA	NA	NA	NA	NA	0.916	NA	NA	NA	NA	NA	NA	NA	NA	NA	NA	NA
SE	Rps6kc1:chr1:190871591-190871951:190888648-190888764:190899450-190899571:-	chr1:190888648-190888764	NA	NA	NA	NA	NA	NA	NA	NA	NA	NA	NA	NA	NA	NA	NA	NA	NA	NA	NA	NA	0.663	NA	NA	NA
SE	Trappc12:chr12:28702806-28703598:28711871-28711984:28721051-28721190:-	chr12:28711871-28711984	NA	NA	NA	0.956	NA	NA	NA	0.883	NA	NA	NA	0.983	NA	NA	NA	NA	NA	NA	NA	0.958	NA	0.983	NA	NA
SE	Cxxc1:chr18:74219130-74219238:74219382-74219567:74219837-74220045:+	chr18:74219382-74219567	NA	NA	NA	NA	NA	NA	NA	NA	NA	NA	NA	NA	NA	NA	NA	NA	NA	NA	NA	NA	NA	0.991	NA	NA
RI	Gas5:chr1:161037504-161037547:161037504-161038037:161037994-161038037:+	chr1:161037547-161037994	0.037	0.034	0.03	0.039	0.028	0.028	0.033	0.033	0.03	0.043	0.036	0.035	0.027	0.025	0.034	0.024	0.023	0.035	0.032	0.026	0.044	0.027	0.035	0.032
SE	Traf6:chr2:101678439-101678620:101680824-101681027:101684478-101684796:+	chr2:101680824-101681027	0.306	0.388	0.429	0.388	0.282	0.62	0.361	0.828	0.661	0.693	0.958	0.552	0.779	0.614	0.282	NA	0.429	0.575	0.383	0.662	0.884	0.436	0.414	0.559
SE	Fam3a:chrX:74387437-74387496:74387627-74387806:74390473-74390497:-	chrX:74387627-74387806	NA	NA	0.889	NA	NA	NA	NA	NA	NA	NA	NA	NA	NA	NA	NA	NA	NA	NA	NA	NA	NA	NA	NA	NA
SE	Crlf1:chr8:70503304-70503492:70503596-70503639:70503820-70504081:+	chr8:70503596-70503639	0.987	0.964	0.99	0.98	0.968	0.989	0.965	0.985	0.987	0.976	0.975	0.975	0.992	0.989	0.997	0.773	0.98	0.979	NA	0.981	0.986	0.988	0.987	0.997
A5SS	Rasa2:chr9:96568363-96568487:96566015-96568487:96560697-96560781:-	chr9:96566015-96568363	NA	NA	NA	NA	NA	NA	NA	0.488	NA	NA	NA	NA	NA	NA	NA	NA	NA	NA	NA	NA	NA	NA	0.568	NA
SE	Plaa:chr4:94571686-94571851:94573981-94574083:94575165-94575234:-	chr4:94573981-94574083	NA	NA	NA	NA	NA	0.993	NA	NA	NA	0.993	NA	NA	0.994	0.991	NA	NA	NA	0.982	NA	NA	0.971	NA	NA	NA
SE	Zc3h11a:chr1:133655344-133655398:133660575-133660621:133661255-133661359:-	chr1:133660575-133660621	NA	NA	NA	0.098	NA	NA	NA	NA	NA	0.048	NA	NA	NA	NA	NA	NA	NA	NA	NA	NA	NA	0.056	NA	NA
SE	Hnrnpr:chr4:136329365-136329501:136332397-136332603:136336297-136336447:+	chr4:136332397-136332603	NA	NA	NA	NA	NA	NA	NA	0.975	NA	NA	0.979	NA	0.983	NA	NA	NA	NA	NA	NA	NA	NA	NA	NA	NA
SE	Tnc:chr4:63971157-63971301:63972677-63972797:63993026-63993299:-	chr4:63972677-63972797	NA	NA	NA	NA	NA	NA	NA	NA	NA	NA	NA	NA	NA	NA	NA	NA	NA	NA	NA	NA	NA	NA	NA	0.999
SE	Supv3l1:chr10:62447023-62447131:62447695-62447773:62449414-62449683:-	chr10:62447695-62447773	NA	NA	NA	0.985	NA	NA	NA	NA	NA	NA	NA	NA	NA	NA	NA	NA	NA	NA	NA	NA	NA	NA	NA	NA
SE	Srpx:chrX:10037976-10039100:10047674-10047796:10049615-10049749:-	chrX:10047674-10047796	0.985	0.941	0.964	0.988	0.975	0.971	0.952	0.972	0.967	0.96	0.996	0.985	0.992	0.976	0.965	NA	0.974	0.955	NA	0.972	0.98	NA	0.979	0.887
A3SS	Ilf3:chr9:21388523-21388753:21388508-21388753:21388111-21388150:+	chr9:21388508-21388523	NA	0.113	0.092	0.177	NA	0.092	NA	0.043	0.013	0.076	0.089	0.09	NA	0.129	0.138	NA	0.108	0.032	0.255	NA	NA	0.089	0.032	NA
SE	Rabl6:chr2:25583017-25583988:25584102-25584161:25584775-25584944:-	chr2:25584102-25584161	NA	NA	NA	NA	NA	NA	NA	NA	NA	NA	NA	NA	NA	0.965	NA	NA	NA	NA	NA	NA	NA	NA	NA	NA
RI	Atp6v1c1:chr15:38679319-38679411:38679319-38681165:38681066-38681165:+	chr15:38679411-38681066	0.021	0.019	0.014	0.016	0.008	0.021	0.03	0.032	0.016	0.016	0.023	0.014	0.023	0.024	0.014	0.016	0.012	0.01	0.023	0.026	0.022	0.015	0.019	0.011
SE	Mbnl2:chr14:120324793-120325412:120379149-120379314:120385390-120385591:+	chr14:120379149-120379314	NA	NA	NA	NA	NA	NA	0.99	NA	NA	NA	NA	NA	NA	NA	NA	NA	NA	NA	NA	NA	NA	NA	NA	NA
SE	Crim1:chr17:78281245-78281366:78302986-78303108:78313123-78313188:+	chr17:78302986-78303108	NA	0.996	0.998	0.984	0.911	NA	0.988	0.945	NA	0.933	0.934	0.994	0.989	0.971	0.998	NA	0.998	0.943	NA	0.983	0.969	0.992	0.976	0.996
SE	Gatd3a:chr10:78162074-78163553:78164837-78164930:78167394-78167442:-	chr10:78164837-78164930	NA	NA	NA	NA	NA	NA	NA	NA	NA	NA	NA	NA	NA	NA	NA	NA	NA	NA	NA	0.991	NA	NA	NA	NA
SE	Atad2b:chr12:4939655-4939705:4940091-4940245:4941971-4942074:+	chr12:4940091-4940245	NA	NA	NA	NA	NA	NA	NA	NA	NA	NA	NA	NA	NA	NA	NA	NA	NA	NA	NA	NA	NA	0.838	NA	NA
SE	Cacna2d1:chr5:16340706-16340783:16341989-16342010:16342682-16342743:+	chr5:16341989-16342010	NA	NA	NA	0.02	NA	0.024	NA	NA	NA	NA	0.099	NA	NA	NA	NA	0.506	NA	0.18	NA	0.111	NA	NA	NA	NA
SE	Rtraf:chr14:19814536-19814605:19816184-19816273:19817060-19817147:-	chr14:19816184-19816273	NA	NA	NA	NA	NA	NA	NA	NA	NA	NA	NA	NA	NA	NA	0.999	NA	NA	NA	NA	NA	NA	NA	NA	NA
SE	Slc30a9:chr5:67346125-67346233:67347919-67348085:67349781-67349911:+	chr5:67347919-67348085	NA	NA	NA	NA	NA	NA	NA	NA	NA	NA	NA	NA	NA	NA	NA	NA	NA	NA	NA	NA	NA	NA	0.994	NA
SE	Ilvbl:chr10:78583014-78583129:78583219-78583389:78583463-78583534:+	chr10:78583219-78583389	NA	NA	NA	NA	NA	NA	NA	NA	NA	NA	NA	NA	NA	NA	NA	NA	NA	NA	NA	NA	0.986	NA	NA	NA
SE	Nectin3:chr16:46437929-46438068:46454623-46454775:46458113-46458231:-	chr16:46454623-46454775	NA	NA	NA	NA	NA	NA	NA	NA	NA	0.923	NA	0.94	NA	NA	NA	NA	NA	NA	NA	NA	NA	NA	NA	NA
RI	Pms2:chr5:143928098-143928266:143928098-143929042:143928941-143929042:+	chr5:143928266-143928941	0.207	0.062	0.103	0.069	0.071	0.108	0.077	0.147	0.153	0.077	0.117	NA	0.204	0.07	0.062	NA	NA	0.325	0.119	0.032	0.083	0.224	0.153	0.352
SE	Rad23a:chr8:84838006-84838134:84838272-84838311:84838468-84838666:-	chr8:84838272-84838311	NA	NA	0.976	NA	NA	NA	NA	NA	NA	NA	NA	NA	NA	0.946	0.87	NA	0.977	NA	NA	NA	NA	NA	NA	NA
SE	Huwe1:chrX:151803260-151803569:151804445-151804540:151806275-151806407:+	chrX:151804445-151804540	0.155	0.524	0.379	0.528	0.647	0.478	0.071	0.647	0.733	0.478	NA	0.47	0.289	0.55	0.588	NA	0.55	0.492	0.55	0.647	0.234	0.647	0.517	0.647
SE	Kidins220:chr12:25040455-25040569:25041245-25041302:25047893-25047926:+	chr12:25041245-25041302	NA	0.083	0.783	0.577	NA	NA	0.083	NA	NA	0.325	0.685	NA	0.42	NA	0.475	NA	NA	NA	NA	0.813	NA	0.743	0.685	0.224
SE	Pdpn:chr4:143270522-143270561:143273899-143274056:143276070-143276207:-	chr4:143273899-143274056	NA	NA	1	NA	NA	NA	NA	NA	NA	NA	NA	NA	NA	NA	NA	NA	NA	NA	NA	NA	NA	NA	NA	NA
SE	Tti1:chr2:158000619-158000808:158007018-158009358:158028373-158028433:-	chr2:158007018-158009358	0.958	NA	NA	NA	NA	NA	NA	NA	NA	NA	NA	NA	NA	NA	NA	NA	NA	NA	NA	0.979	NA	NA	NA	0.98
RI	Pi4k2a:chr19:42115036-42115136:42115036-42116018:42115884-42116018:+	chr19:42115136-42115884	0.134	0.075	0.064	0.118	0.095	0.083	0.104	0.125	0.096	0.131	0.166	0.105	0.057	0.059	0.06	0.107	0.055	0.142	0.112	0.093	0.133	0.065	0.066	0.081
SE	Ccdc167:chr17:29693459-29700252:29704369-29704469:29705270-29705323:-	chr17:29704369-29704469	NA	NA	NA	NA	NA	NA	NA	NA	NA	NA	NA	NA	NA	NA	0.893	NA	NA	NA	NA	NA	NA	NA	NA	NA
SE	Rnf20:chr4:49644483-49644630:49645618-49645696:49645885-49646005:+	chr4:49645618-49645696	NA	NA	NA	0.979	NA	NA	NA	NA	NA	NA	NA	NA	NA	NA	NA	NA	NA	NA	NA	NA	NA	NA	NA	NA
SE	Gsn:chr2:35284673-35284828:35290332-35290494:35292586-35292736:+	chr2:35290332-35290494	NA	NA	NA	NA	NA	NA	NA	NA	1	NA	NA	NA	NA	NA	NA	NA	NA	NA	NA	NA	NA	NA	NA	NA
SE	Galnt11:chr5:25250086-25250253:25252023-25252149:25254906-25255156:+	chr5:25252023-25252149	0.987	NA	NA	NA	NA	NA	NA	0.985	NA	NA	NA	NA	0.971	0.991	NA	NA	NA	0.986	NA	NA	0.977	NA	0.986	NA
SE	Bach2:chr4:32317197-32317304:32417434-32417583:32501612-32501636:+	chr4:32417434-32417583	NA	0.879	0.949	NA	NA	NA	NA	NA	NA	NA	NA	NA	NA	NA	0.929	NA	0.792	NA	0.833	NA	NA	0.968	NA	NA
SE	Pithd1:chr4:135977148-135977257:135978796-135978901:135985940-135986018:-	chr4:135978796-135978901	NA	NA	NA	NA	NA	0.941	NA	0.986	NA	NA	NA	NA	NA	NA	NA	NA	NA	NA	NA	NA	NA	NA	NA	NA
SE	Trmt10a:chr3:138143798-138143995:138145760-138145925:138147374-138147570:+	chr3:138145760-138145925	0.137	NA	NA	NA	NA	NA	0.24	NA	NA	NA	0.399	NA	NA	NA	NA	NA	NA	NA	NA	NA	NA	NA	0.137	0.192
SE	Fam120a:chr13:48932296-48932393:48933949-48934078:48945941-48946024:-	chr13:48933949-48934078	0.997	0.991	NA	NA	NA	NA	NA	NA	NA	NA	NA	NA	NA	NA	0.996	NA	0.998	NA	NA	0.997	NA	NA	NA	NA
SE	Bclaf3:chrX:159553243-159553894:159555474-159555650:159557442-159557557:+	chrX:159555474-159555650	NA	NA	NA	NA	NA	NA	NA	NA	NA	NA	NA	NA	NA	NA	0.923	NA	NA	NA	NA	NA	NA	NA	NA	NA
SE	Urod:chr4:116993279-116993467:116993584-116993697:116994330-116994340:-	chr4:116993584-116993697	NA	0.994	NA	NA	NA	NA	0.981	NA	NA	NA	NA	NA	NA	NA	NA	NA	NA	NA	0.98	NA	NA	NA	NA	NA
SE	Pcbp4:chr9:106460396-106460429:106460650-106460767:106460992-106461078:+	chr9:106460650-106460767	NA	NA	NA	NA	NA	0.995	NA	NA	NA	NA	NA	NA	NA	NA	NA	NA	NA	NA	NA	NA	NA	NA	NA	NA
SE	Parp9:chr16:35956806-35957025:35960003-35960061:35963974-35964364:+	chr16:35960003-35960061	NA	NA	NA	NA	NA	NA	NA	NA	0.953	NA	NA	NA	NA	NA	NA	NA	NA	NA	NA	NA	NA	NA	NA	NA
SE	Agap1:chr1:89766305-89766464:89789162-89789324:89834433-89834588:+	chr1:89789162-89789324	NA	0.844	NA	0.885	NA	NA	0.926	NA	0.941	NA	NA	0.901	0.657	NA	0.841	NA	NA	0.742	0.918	NA	NA	NA	0.82	NA
SE	Vps53:chr11:76136198-76136314:76138307-76138394:76163797-76163864:-	chr11:76138307-76138394	NA	NA	NA	NA	NA	NA	NA	NA	NA	0.959	NA	NA	NA	NA	NA	NA	NA	NA	NA	NA	NA	NA	0.987	NA
SE	Eda:chrX:100395018-100395143:100395674-100395830:100396904-100400760:+	chrX:100395674-100395830	NA	NA	NA	0.089	NA	NA	NA	0.14	NA	NA	NA	NA	NA	NA	NA	NA	NA	NA	NA	NA	0.281	NA	NA	NA
SE	Gsn:chr2:35266819-35266903:35282659-35282721:35283904-35284109:+	chr2:35282659-35282721	0.049	0.025	0.026	0.053	0.079	0.072	0.055	0.05	0.054	0.041	0.046	0.065	0.077	0.049	0.023	NA	0.017	0.035	0.011	0.05	0.103	0.023	0.058	0.015
SE	Map4k5:chr12:69822802-69822863:69823421-69823501:69824579-69824664:-	chr12:69823421-69823501	NA	NA	NA	NA	0.975	NA	NA	NA	NA	NA	NA	NA	NA	NA	NA	NA	NA	NA	NA	NA	NA	NA	NA	NA
SE	Pitpnb:chr5:111371311-111371389:111380191-111380302:111382987-111383110:+	chr5:111380191-111380302	NA	NA	NA	NA	NA	0.995	NA	0.988	NA	NA	NA	0.995	NA	NA	NA	NA	NA	NA	NA	NA	0.995	NA	NA	NA
SE	Tmco1:chr1:167314106-167314166:167316242-167316289:167319261-167319329:+	chr1:167316242-167316289	0.992	0.997	0.994	NA	0.997	NA	NA	NA	0.992	NA	NA	NA	NA	NA	0.998	NA	NA	NA	0.994	0.994	NA	NA	0.992	0.994
SE	Lias:chr5:65391543-65392389:65393940-65394034:65395364-65395445:+	chr5:65393940-65394034	0.994	NA	NA	NA	NA	NA	NA	NA	NA	NA	NA	NA	NA	NA	NA	NA	NA	NA	NA	NA	NA	NA	NA	NA
SE	Acox3:chr5:35599691-35599874:35601502-35601625:35602920-35603041:+	chr5:35601502-35601625	NA	NA	NA	NA	NA	NA	NA	NA	NA	NA	NA	NA	NA	NA	NA	NA	0.963	NA	NA	NA	NA	NA	NA	NA
SE	Phf20l1:chr15:66629909-66629981:66630866-66631045:66632705-66632901:+	chr15:66630866-66631045	NA	NA	NA	NA	0.967	NA	NA	NA	0.927	NA	0.831	NA	NA	NA	NA	NA	NA	NA	NA	0.954	0.929	NA	0.968	NA
A5SS	Rpe:chr1:66700830-66701028:66700830-66701417:66701616-66701648:+	chr1:66701028-66701417	NA	0.624	NA	NA	NA	0.689	NA	NA	0.27	NA	NA	0.753	0.753	NA	NA	NA	NA	NA	NA	0.501	NA	NA	NA	0.689
SE	Tmod1:chr4:46038934-46039309:46060965-46061134:46083543-46083663:+	chr4:46060965-46061134	NA	NA	0.929	NA	NA	NA	NA	NA	NA	NA	NA	NA	NA	NA	NA	NA	NA	NA	NA	NA	NA	NA	NA	0.831
A3SS	Gm6093:chr13:33565234-33565283:33565234-33565286:33569121-33569317:-	chr13:33565283-33565286	NA	0.655	0.529	0.495	NA	0.376	NA	0.14	0.534	0.696	0.855	NA	NA	0.246	0.614	0.548	0.772	NA	0.62	0.844	0.578	0.587	0.282	0.632
A3SS	Tor1b:chr2:30955777-30955953:30955767-30955953:30955252-30955529:+	chr2:30955767-30955777	NA	NA	NA	NA	NA	NA	NA	NA	NA	NA	NA	NA	NA	NA	NA	NA	NA	NA	NA	0.894	NA	NA	NA	NA
SE	Tcerg1l:chr7:138394116-138394297:138395026-138395173:138397320-138397728:-	chr7:138395026-138395173	NA	NA	0.819	NA	NA	NA	NA	NA	NA	NA	NA	NA	NA	NA	NA	NA	NA	NA	NA	NA	NA	NA	NA	0.801
RI	Rpl27a:chr7:109519584-109519648:109519584-109519993:109519917-109519993:+	chr7:109519648-109519917	0.003	0.002	0.002	0.003	0.003	0.003	0.004	0.003	0.005	0.003	0.006	0.005	0.003	0.002	0.002	NA	0.002	0.002	0.004	0.004	0.004	0.002	0.002	0.002
SE	Cnppd1:chr1:75141415-75141503:75142057-75142560:75142642-75142697:-	chr1:75142057-75142560	0.983	0.944	0.948	NA	NA	NA	0.908	0.953	NA	NA	0.951	NA	NA	0.918	NA	NA	0.962	0.974	NA	NA	NA	0.943	NA	0.751
SE	Tada3:chr6:113366024-113367180:113370221-113370407:113370938-113371048:-	chr6:113370221-113370407	NA	0.978	NA	0.987	NA	NA	NA	NA	NA	NA	NA	NA	NA	NA	NA	NA	NA	NA	NA	NA	NA	NA	NA	NA
SE	Fam220a:chr5:143548760-143549134:143551408-143551541:143562756-143564527:+	chr5:143551408-143551541	0.011	0.036	0.061	0.026	0.069	0.072	0.071	0.025	0.082	0.08	0.031	0.022	NA	0.09	0.04	NA	0.088	0.006	0.009	0.071	0.036	0.063	0.054	0.034
SE	Adamts18:chr8:113773064-113773224:113774933-113775017:113775255-113775449:-	chr8:113774933-113775017	NA	NA	0.943	NA	NA	NA	NA	NA	NA	NA	NA	NA	NA	NA	NA	NA	NA	NA	NA	NA	NA	NA	NA	NA
SE	Slfn5:chr11:82952101-82952195:82954716-82954782:82956262-82957290:+	chr11:82954716-82954782	NA	NA	NA	0.464	NA	0.735	NA	NA	0.188	0.818	0.675	0.409	0.708	0.454	NA	NA	NA	0.536	NA	NA	NA	NA	0.893	0.874
A3SS	Rgs11:chr17:26203465-26203512:26203461-26203512:26203213-26203392:+	chr17:26203461-26203465	NA	NA	NA	NA	NA	NA	NA	NA	NA	NA	NA	NA	NA	NA	NA	NA	NA	NA	NA	0.915	NA	NA	NA	NA
A5SS	Rab23:chr1:33723785-33724005:33723785-33724102:33724933-33725019:+	chr1:33724005-33724102	0.036	NA	0.011	NA	0.056	NA	NA	0.036	0.123	0.015	0.012	0.017	NA	0.017	0.048	NA	0.041	NA	0.063	NA	0.013	NA	NA	NA
SE	Zfp326:chr5:105876940-105877231:105878387-105878520:105878748-105878793:+	chr5:105878387-105878520	NA	NA	NA	NA	NA	NA	NA	NA	0.346	NA	NA	NA	NA	NA	NA	NA	NA	NA	NA	NA	NA	NA	NA	NA
A5SS	Gatad2b:chr3:90351403-90351526:90351403-90351574:90351813-90352129:+	chr3:90351526-90351574	NA	NA	0.953	NA	NA	0.986	NA	NA	0.974	NA	NA	NA	NA	NA	NA	NA	NA	NA	NA	NA	NA	0.981	NA	NA
SE	Vsir:chr10:60358943-60358994:60364200-60364308:60367765-60367768:+	chr10:60364200-60364308	NA	NA	NA	NA	NA	NA	NA	NA	NA	NA	NA	0.948	NA	NA	NA	NA	NA	NA	NA	NA	NA	NA	NA	0.97
SE	Itga1:chr13:115030882-115030994:115031104-115031193:115035272-115035385:-	chr13:115031104-115031193	NA	NA	NA	NA	NA	0.982	NA	NA	NA	NA	NA	NA	NA	NA	NA	NA	NA	NA	NA	NA	0.989	NA	NA	NA
SE	March3:chr18:56775851-56776108:56783018-56783228:56807663-56807868:-	chr18:56783018-56783228	NA	NA	NA	0.906	0.949	0.969	0.967	0.94	NA	0.96	0.974	0.979	0.944	0.937	NA	NA	NA	0.983	NA	0.974	0.987	NA	0.963	NA
SE	Etl4:chr2:20713354-20713448:20743458-20744291:20760214-20760264:+	chr2:20743458-20744291	NA	NA	NA	NA	NA	0.785	NA	NA	NA	NA	NA	NA	NA	NA	NA	NA	NA	NA	NA	NA	NA	NA	NA	NA
SE	Rbfox2:chr15:77091811-77091854:77094450-77094490:77097939-77098072:-	chr15:77094450-77094490	0.784	0.78	0.657	0.452	0.958	NA	0.942	NA	NA	NA	0.913	0.954	NA	0.678	0.504	NA	NA	NA	NA	0.585	0.653	0.791	0.907	NA
A3SS	Col16a1:chr4:130092739-130092781:130092730-130092781:130090506-130090560:+	chr4:130092730-130092739	NA	NA	NA	NA	NA	NA	0.985	NA	NA	NA	NA	NA	NA	NA	NA	NA	NA	NA	NA	NA	NA	0.981	NA	NA
SE	Sbf1:chr15:89299482-89299620:89299704-89299901:89300220-89300428:-	chr15:89299704-89299901	NA	NA	NA	NA	NA	NA	NA	NA	NA	NA	NA	NA	NA	0.981	NA	NA	NA	NA	NA	NA	NA	NA	NA	NA
SE	Synj2:chr17:5941279-5941577:5975794-5975881:5985971-5986242:+	chr17:5975794-5975881	NA	NA	NA	NA	NA	NA	NA	NA	NA	NA	NA	NA	NA	NA	NA	NA	0.964	NA	NA	NA	NA	NA	NA	NA
SE	Slc25a40:chr5:8422849-8423039:8427195-8427267:8427407-8427516:+	chr5:8427195-8427267	0.443	0.496	0.455	0.593	0.574	0.428	0.622	0.597	0.473	0.281	0.648	0.486	NA	0.702	0.259	0.764	0.28	0.403	0.541	0.817	0.628	0.349	0.369	0.423
SE	Mff:chr1:82735418-82735507:82741817-82741976:82747082-82747142:+	chr1:82741817-82741976	0.213	0.255	0.244	0.292	0.187	0.214	0.162	0.282	0.227	0.155	0.293	0.171	0.202	0.192	0.301	0.245	0.271	0.239	0.184	0.277	0.301	0.272	0.232	0.283
SE	Adamts12:chr15:11258955-11259101:11263283-11263453:11270560-11270694:+	chr15:11263283-11263453	NA	NA	NA	0.962	0.963	NA	NA	NA	NA	NA	NA	NA	NA	NA	NA	NA	NA	NA	NA	NA	NA	NA	NA	NA
SE	Gm49322:chr10:80606020-80608850:80611027-80611129:80612341-80612459:+	chr10:80611027-80611129	NA	NA	0.984	NA	NA	NA	NA	NA	NA	NA	NA	NA	NA	NA	NA	NA	NA	NA	NA	NA	NA	0.987	NA	NA
SE	Ruvbl2:chr7:45431319-45431374:45434251-45434356:45434880-45435337:-	chr7:45434251-45434356	0.917	NA	NA	0.908	NA	NA	NA	NA	0.912	NA	0.789	NA	NA	NA	NA	NA	NA	NA	NA	0.976	NA	NA	NA	NA
SE	Fam49a:chr12:12276342-12276415:12295615-12295688:12304180-12304322:+	chr12:12295615-12295688	NA	NA	0.309	NA	NA	NA	NA	NA	NA	NA	NA	NA	NA	NA	NA	NA	NA	NA	NA	NA	NA	NA	NA	NA
SE	Pakap:chr4:57757600-57757683:57854561-57857037:57883023-57883202:+	chr4:57854561-57857037	NA	NA	NA	NA	NA	NA	NA	NA	NA	NA	NA	NA	NA	NA	NA	NA	NA	NA	0.986	NA	NA	NA	NA	NA
SE	4930447C04Rik:chr12:72892803-72892979:72894983-72895045:72898486-72898533:-	chr12:72894983-72895045	NA	NA	NA	0.081	NA	NA	NA	NA	0.15	NA	NA	NA	NA	NA	NA	NA	NA	NA	NA	0.585	NA	0.414	NA	NA
A3SS	Dst:chr1:34166941-34167091:34166938-34167091:34166179-34166305:+	chr1:34166938-34166941	NA	NA	NA	NA	NA	NA	NA	NA	NA	NA	NA	NA	NA	0.964	NA	NA	NA	NA	NA	NA	NA	NA	NA	NA
SE	Fam118b:chr9:35244613-35244706:35267036-35267111:35267722-35267777:-	chr9:35267036-35267111	NA	NA	NA	NA	NA	NA	NA	NA	NA	NA	0.045	NA	NA	NA	NA	NA	NA	NA	NA	NA	NA	NA	NA	NA
RI	Optn:chr2:5020641-5021228:5020641-5021481:5021322-5021481:-	chr2:5021228-5021322	0.841	0.965	0.898	0.609	0.978	0.971	0.883	0.936	0.952	0.851	0.861	0.82	0.948	NA	0.932	NA	NA	0.928	0.748	0.792	0.965	0.929	0.825	NA
SE	Sgms1:chr19:32142745-32142863:32159523-32160363:32223508-32223590:-	chr19:32159523-32160363	NA	0.981	0.906	NA	NA	0.959	NA	NA	NA	NA	NA	NA	0.887	NA	NA	NA	0.963	NA	NA	NA	0.975	0.958	NA	0.984
SE	Cox19:chr5:139336188-139338375:139342562-139342674:139345071-139345125:-	chr5:139342562-139342674	NA	NA	NA	NA	NA	NA	NA	NA	NA	NA	NA	NA	NA	NA	NA	NA	NA	NA	NA	NA	NA	NA	NA	0.996
SE	Cacna1g:chr11:94418818-94418970:94423670-94423724:94425784-94425977:-	chr11:94423670-94423724	NA	NA	NA	NA	NA	NA	NA	NA	NA	NA	NA	NA	NA	NA	NA	NA	0.955	NA	NA	NA	NA	0.969	NA	NA
SE	Atp6v1h:chr1:5089008-5089111:5093362-5093452:5095614-5095659:+	chr1:5093362-5093452	0.98	0.998	0.984	0.984	0.987	0.971	NA	0.966	0.993	NA	0.992	0.996	NA	NA	0.997	0.971	0.995	0.989	NA	0.954	0.986	0.983	0.991	0.997
SE	Mtg2:chr2:180084063-180084312:180084450-180084589:180085379-180085895:+	chr2:180084450-180084589	NA	0.967	NA	NA	NA	NA	NA	0.943	NA	NA	NA	NA	NA	NA	NA	NA	NA	NA	NA	NA	NA	NA	NA	NA
RI	Celf2:chr2:6604023-6604182:6604023-6607961:6607881-6607961:-	chr2:6604182-6607881	0.004	0.005	0.003	0.004	0.009	0.008	0.004	0.008	0.008	0.006	0.006	0.005	0.002	0.012	0.005	0.006	0.001	0.011	0.004	0.003	0.005	0.007	0.004	0.004
SE	Kiz:chr2:146863706-146863869:146870765-146870846:146889020-146889666:+	chr2:146870765-146870846	0.926	0.79	0.955	0.827	0.953	0.947	0.905	0.769	0.941	0.786	0.975	0.923	0.85	0.925	0.764	0.87	0.802	0.835	NA	0.888	0.972	0.971	0.938	0.814
RI	Xrcc1:chr7:24566218-24566293:24566218-24566500:24566388-24566500:+	chr7:24566293-24566388	0.101	0.087	0.098	0.151	0.066	0.113	0.15	0.169	0.121	0.068	0.054	0.083	0.143	0.221	0.138	0.07	0.077	0.021	0.095	0.119	0.161	0.175	0.176	0.134
SE	Cstf2:chrX:134072414-134072474:134072677-134072764:134073213-134073277:+	chrX:134072677-134072764	NA	NA	NA	NA	NA	0.387	NA	NA	NA	NA	NA	NA	NA	NA	0.387	NA	NA	NA	NA	NA	NA	NA	NA	NA
SE	Timp1:chrX:20870220-20870324:20871030-20871162:20873049-20873176:+	chrX:20871030-20871162	NA	0.973	0.955	NA	NA	NA	NA	NA	NA	NA	NA	NA	NA	0.971	NA	NA	NA	NA	NA	NA	NA	0.989	0.989	NA
SE	Ifi27:chr12:103435421-103435573:103437675-103437705:103439400-103439562:+	chr12:103437675-103437705	NA	NA	NA	NA	NA	NA	NA	NA	NA	0.968	NA	NA	NA	NA	NA	NA	NA	NA	NA	NA	NA	NA	NA	NA
SE	Rapgef1:chr2:29679132-29679269:29679736-29679850:29686104-29686283:+	chr2:29679736-29679850	0.517	0.414	0.514	0.595	0.589	0.483	0.535	0.666	0.603	0.584	0.632	0.502	0.56	0.572	0.502	0.268	0.527	0.456	0.421	0.54	0.444	0.522	0.495	0.432
SE	Nr1d2:chr14:18211778-18211964:18221986-18222253:18238810-18239031:-	chr14:18221986-18222253	NA	NA	NA	NA	NA	NA	NA	NA	NA	0.85	NA	NA	NA	NA	NA	NA	NA	NA	NA	NA	0.85	NA	NA	NA
SE	Rab4a:chr8:123830232-123830387:123832802-123832898:123834014-123834147:+	chr8:123832802-123832898	NA	NA	NA	NA	NA	NA	NA	NA	NA	NA	0.978	NA	NA	NA	NA	NA	NA	NA	NA	NA	NA	NA	NA	NA
SE	Dipk1c:chr18:84730029-84730689:84736811-84736976:84739368-84739408:+	chr18:84736811-84736976	NA	0.94	0.91	NA	NA	NA	NA	NA	NA	NA	NA	NA	NA	NA	0.937	NA	NA	NA	0.898	NA	NA	0.924	NA	0.823
SE	Bin1:chr18:32424819-32424967:32426223-32426352:32431982-32432093:+	chr18:32426223-32426352	0.028	0.083	0.089	0.047	0.088	0.059	NA	0.025	0.131	0.108	NA	0.084	0.009	0.176	0.078	NA	0.131	0.072	0.08	0.039	0.056	0.156	0.075	0.157
SE	Adam1a:chr5:121534334-121534430:121538392-121538490:121539171-121539247:-	chr5:121538392-121538490	NA	NA	NA	NA	0.844	NA	NA	NA	NA	NA	NA	NA	NA	NA	NA	NA	NA	0.969	NA	NA	NA	NA	NA	NA
A3SS	Itpr1:chr6:108432648-108432696:108432645-108432696:108431460-108431496:+	chr6:108432645-108432648	0.495	NA	0.662	NA	0.662	0.662	NA	NA	NA	NA	NA	NA	NA	NA	0.197	NA	NA	NA	NA	NA	NA	NA	NA	NA
SE	Coq8b:chr7:27250535-27250643:27251429-27251642:27252260-27252326:+	chr7:27251429-27251642	NA	NA	NA	NA	0.005	0.01	NA	0.01	0.02	NA	NA	NA	0.003	0.013	NA	NA	0.006	0.008	NA	NA	NA	NA	0.016	NA
SE	Lars:chr18:42251292-42251380:42257069-42257194:42261960-42262118:-	chr18:42257069-42257194	NA	NA	0.986	NA	NA	NA	NA	NA	NA	NA	NA	NA	NA	0.986	NA	NA	NA	NA	NA	NA	NA	NA	NA	0.964
SE	Luc7l:chr17:26253973-26255125:26257925-26258024:26266282-26266393:+	chr17:26257925-26258024	NA	NA	NA	NA	NA	NA	NA	NA	0.993	NA	NA	NA	NA	NA	NA	NA	NA	0.982	0.984	NA	NA	NA	NA	NA
SE	Ctnnb1:chr9:120952858-120953003:120955147-120955251:120955328-120955399:+	chr9:120955147-120955251	NA	0.999	0.999	NA	NA	NA	NA	NA	NA	NA	NA	NA	NA	NA	NA	NA	NA	NA	NA	NA	NA	NA	NA	NA
SE	Zbtb20:chr16:43024937-43024987:43193464-43193538:43302568-43302615:+	chr16:43193464-43193538	NA	NA	NA	NA	NA	0.401	NA	NA	NA	NA	NA	NA	NA	NA	NA	NA	NA	NA	NA	NA	NA	NA	NA	NA
A3SS	Camk2d:chr3:126779944-126779999:126779900-126779999:126770784-126770857:+	chr3:126779900-126779944	NA	NA	0.436	NA	NA	NA	NA	NA	NA	0.306	NA	NA	NA	NA	NA	NA	NA	NA	NA	NA	NA	NA	NA	NA
SE	C2cd3:chr7:100395754-100395844:100399667-100399815:100405957-100406106:+	chr7:100399667-100399815	NA	NA	NA	NA	NA	NA	NA	NA	NA	NA	NA	NA	NA	NA	NA	NA	NA	NA	NA	NA	NA	0.931	NA	NA
SE	Araf:chrX:20858741-20858873:20859684-20859819:20859978-20860208:+	chrX:20859684-20859819	NA	NA	NA	NA	NA	NA	NA	0.993	NA	NA	NA	NA	NA	0.993	NA	NA	0.991	NA	NA	NA	NA	NA	NA	NA
SE	Zfp638:chr6:83978021-83978087:83978993-83979909:83983975-83984074:+	chr6:83978993-83979909	NA	NA	0.984	0.987	NA	NA	NA	NA	0.976	NA	NA	NA	NA	0.961	NA	NA	NA	NA	NA	NA	NA	NA	NA	NA
SE	Senp6:chr9:80130738-80130858:80132888-80132981:80136457-80136882:+	chr9:80132888-80132981	NA	NA	NA	NA	NA	0.952	NA	0.986	NA	0.977	NA	NA	0.982	NA	0.965	NA	NA	NA	NA	NA	0.969	NA	0.962	NA
SE	Cep63:chr9:102619691-102619760:102623555-102623593:102626262-102626534:-	chr9:102623555-102623593	NA	0.066	NA	NA	NA	NA	NA	NA	NA	NA	NA	NA	NA	NA	NA	NA	NA	NA	NA	0.109	NA	0.046	NA	NA
SE	Abl1:chr2:31689610-31689942:31690554-31690759:31778333-31778507:+	chr2:31690554-31690759	NA	NA	0.039	0.023	NA	0.01	NA	0.07	NA	0.012	NA	0.029	NA	0.018	0.045	NA	NA	NA	0.063	0.014	NA	0.089	0.011	0.011
SE	Abat:chr16:8608855-8608993:8611126-8611294:8613982-8614129:+	chr16:8611126-8611294	0.723	0.878	0.869	0.849	0.708	0.961	0.893	0.838	NA	NA	0.873	NA	0.864	0.961	0.732	NA	0.838	0.767	0.862	0.856	NA	0.839	NA	0.871
SE	Pot1a:chr6:25745890-25745996:25748290-25748382:25750049-25750138:-	chr6:25748290-25748382	NA	NA	0.932	0.967	NA	NA	NA	NA	NA	NA	0.966	NA	NA	NA	NA	NA	0.868	NA	NA	0.903	NA	NA	0.938	NA
SE	Dixdc1:chr9:50682032-50682200:50682536-50682626:50683724-50683796:-	chr9:50682536-50682626	0.737	0.814	0.87	0.862	NA	NA	NA	0.935	NA	NA	NA	0.922	NA	NA	NA	NA	0.829	NA	NA	NA	0.814	0.873	NA	0.957
SE	Zfp516:chr18:82955523-82957449:82986743-82988198:83001272-83005314:+	chr18:82986743-82988198	0.987	0.992	0.983	NA	NA	0.943	0.953	NA	NA	NA	NA	0.976	NA	NA	0.964	NA	NA	NA	0.956	NA	NA	0.979	NA	0.98
SE	Anapc7:chr5:122428130-122428317:122429485-122429605:122432740-122432852:+	chr5:122429485-122429605	NA	0.986	NA	NA	NA	NA	NA	0.987	NA	NA	NA	0.985	0.994	0.993	NA	NA	NA	0.985	NA	NA	NA	0.991	NA	NA
SE	Lzts2:chr19:45014864-45015323:45021386-45021836:45024718-45024917:+	chr19:45021386-45021836	NA	NA	0.983	NA	0.993	NA	NA	NA	0.986	0.971	NA	NA	NA	NA	0.985	NA	0.995	NA	NA	NA	NA	0.987	NA	0.966
SE	Gm38431:chr9:21073074-21075496:21075584-21075668:21075963-21076107:-	chr9:21075584-21075668	NA	0.99	0.974	NA	0.992	NA	NA	NA	NA	NA	NA	NA	NA	NA	NA	NA	NA	NA	NA	NA	NA	NA	NA	NA
SE	1810062O18Rik:chr14:20565010-20565047:20569869-20570022:20570341-20570680:+	chr14:20569869-20570022	0.686	NA	0.664	0.712	NA	NA	NA	0.248	0.664	NA	0.652	NA	0.644	0.633	NA	NA	NA	0.816	NA	NA	NA	NA	0.664	NA
SE	Trp53bp1:chr2:121208354-121208504:121209080-121209352:121211269-121211422:-	chr2:121209080-121209352	NA	NA	NA	NA	NA	NA	NA	NA	NA	NA	0.935	NA	NA	NA	NA	NA	NA	NA	NA	NA	0.98	NA	NA	NA
A3SS	Eci2:chr13:34993067-34993220:34993067-34993328:34994013-34994132:-	chr13:34993220-34993328	0.735	0.537	0.826	0.744	0.763	0.724	0.617	0.661	0.607	0.672	0.757	0.721	0.879	0.605	0.715	NA	0.625	0.514	0.647	0.78	0.63	0.751	0.565	0.74
SE	Vps26a:chr10:62469900-62470057:62471059-62471135:62480557-62480707:-	chr10:62471059-62471135	0.99	NA	0.99	0.994	0.987	0.959	NA	NA	NA	NA	0.987	0.995	NA	0.944	NA	NA	NA	0.982	0.942	NA	0.995	0.996	0.975	0.994
SE	Il3ra:chr14:14346429-14346512:14347099-14347188:14348820-14348944:+	chr14:14347099-14347188	NA	NA	NA	NA	NA	NA	NA	NA	0.385	NA	NA	NA	NA	0.862	NA	NA	NA	NA	NA	NA	NA	NA	NA	NA
SE	E130307A14Rik:chr10:39622975-39623091:39632949-39633016:39681472-39681549:-	chr10:39632949-39633016	NA	NA	NA	NA	NA	NA	NA	NA	NA	NA	NA	NA	NA	NA	NA	NA	NA	0.408	NA	NA	NA	NA	NA	NA
SE	Zfp644:chr5:106666784-106666845:106679679-106679743:106681903-106682013:-	chr5:106679679-106679743	NA	NA	NA	NA	NA	NA	NA	NA	NA	0.412	NA	NA	NA	0.412	NA	NA	NA	NA	NA	NA	0.412	0.259	NA	NA
SE	Odf2l:chr3:145136587-145136723:145139783-145139894:145144311-145144416:+	chr3:145139783-145139894	NA	0.966	NA	NA	0.87	NA	NA	NA	NA	NA	NA	0.975	NA	NA	NA	NA	NA	NA	NA	NA	NA	NA	NA	NA
SE	Cmc2:chr8:116889631-116889859:116911083-116911234:116921350-116921365:-	chr8:116911083-116911234	NA	0.951	NA	NA	NA	NA	0.894	NA	NA	0.892	NA	NA	NA	NA	NA	NA	0.956	NA	NA	NA	NA	NA	NA	NA
SE	Ece1:chr4:137862236-137862381:137905069-137905155:137913767-137913854:+	chr4:137905069-137905155	0.106	0.13	0.016	0.187	0.164	0.151	0.054	NA	0.104	0.019	0.435	0.091	0.032	0.054	0.077	0.17	0.026	0.127	NA	0.1	0.092	0.091	0.16	0.066
SE	Nckap1:chr2:80570118-80570229:80571212-80571230:80580857-80581380:-	chr2:80571212-80571230	NA	NA	0.009	0.025	0.009	NA	NA	NA	NA	0.02	0.048	NA	NA	NA	0.017	NA	NA	NA	NA	NA	NA	0.005	NA	NA
RI	Hdac3:chr18:37943677-37943751:37943677-37944209:37944128-37944209:-	chr18:37943751-37944128	0.123	0.144	0.108	0.164	0.104	0.119	0.166	0.206	0.245	0.079	0.12	0.126	0.144	0.138	0.082	0.172	0.148	0.131	0.159	0.126	0.16	0.107	0.13	0.193
SE	Xbp1:chr11:5520658-5521200:5521922-5522019:5523332-5523467:+	chr11:5521922-5522019	NA	NA	NA	NA	0.991	NA	NA	NA	NA	0.996	NA	NA	NA	NA	0.987	NA	0.991	0.996	NA	NA	NA	NA	NA	NA
SE	Pcnx:chr12:81917664-81919380:81928241-81928374:81946930-81947021:+	chr12:81928241-81928374	0.257	0.214	0.23	0.317	0.033	0.079	0.057	0.088	0.284	0.16	0.16	0.33	0.209	0.103	0.163	NA	0.257	0.196	0.334	0.06	0.257	0.234	0.099	0.337
A5SS	Supt20:chr3:54692857-54692881:54692857-54692894:54693102-54693208:+	chr3:54692881-54692894	NA	NA	0.674	NA	NA	NA	NA	NA	0.847	NA	NA	NA	NA	NA	0.786	NA	NA	0.479	NA	NA	0.763	NA	0.617	NA
SE	Srcap:chr7:127511982-127512338:127514164-127514240:127515203-127515310:+	chr7:127514164-127514240	NA	NA	NA	NA	NA	0.879	NA	NA	NA	0.665	NA	0.903	NA	NA	NA	NA	0.849	NA	NA	NA	NA	0.823	NA	NA
SE	Usp34:chr11:23459123-23459228:23460561-23460709:23464216-23464851:+	chr11:23460561-23460709	NA	NA	NA	NA	NA	NA	NA	NA	NA	NA	NA	NA	0.973	NA	NA	NA	NA	NA	NA	NA	NA	NA	NA	NA
SE	Pkm:chr9:59675028-59675195:59675567-59675734:59678043-59678225:+	chr9:59675567-59675734	0.709	0.804	0.779	0.419	NA	0.841	0.734	NA	0.573	NA	NA	0.821	0.69	0.824	0.723	NA	0.786	0.774	0.758	0.462	0.548	0.755	0.829	0.8
SE	Cacna1c:chr6:118734850-118735023:118742264-118742368:118751368-118751565:-	chr6:118742264-118742368	NA	NA	NA	NA	NA	NA	NA	NA	NA	NA	NA	NA	NA	NA	NA	NA	NA	0.44	NA	NA	NA	NA	NA	0.639
SE	Apbb1ip:chr2:22816952-22817024:22819604-22819692:22823294-22823596:+	chr2:22819604-22819692	NA	NA	NA	NA	NA	NA	NA	NA	NA	0.969	NA	NA	NA	0.989	NA	NA	NA	0.984	NA	NA	NA	0.987	NA	NA
A5SS	Hmga1:chr17:27559532-27559670:27559532-27559703:27560927-27561011:+	chr17:27559670-27559703	0.521	0.463	0.463	0.314	0.402	0.38	0.344	0.454	0.395	0.313	0.459	0.42	0.687	0.422	0.415	0.553	0.425	0.331	0.389	0.479	0.401	0.465	0.378	0.436
SE	Crim1:chr17:78200247-78201099:78237741-78237915:78335226-78335355:+	chr17:78237741-78237915	NA	NA	NA	NA	NA	NA	NA	NA	NA	NA	NA	NA	NA	NA	NA	NA	0.997	NA	NA	NA	NA	0.987	NA	0.997
SE	Gm28036:chr2:156079338-156079464:156098184-156098372:156103348-156103429:-	chr2:156098184-156098372	0.661	0.348	0.466	0.533	0.434	0.439	0.634	0.513	0.447	0.413	0.578	0.21	0.528	0.446	0.242	NA	0.336	0.404	0.526	0.625	0.618	0.329	0.418	0.345
SE	Man1c1:chr4:134584299-134584394:134591355-134591436:134593249-134593365:-	chr4:134591355-134591436	NA	NA	NA	NA	NA	NA	NA	NA	NA	NA	NA	NA	NA	NA	NA	NA	0.988	NA	NA	NA	NA	NA	NA	NA
SE	Ezh2:chr6:47576535-47576664:47577543-47577667:47594893-47595030:-	chr6:47577543-47577667	NA	NA	NA	NA	NA	NA	NA	NA	NA	NA	NA	NA	NA	NA	NA	NA	NA	NA	0.908	NA	NA	NA	NA	NA
SE	Pold3:chr7:100100419-100100681:100106562-100106695:100108511-100108551:-	chr7:100106562-100106695	NA	NA	NA	0.928	NA	NA	0.965	NA	NA	NA	NA	NA	NA	NA	NA	NA	NA	NA	NA	NA	NA	NA	NA	NA
SE	Gramd3:chr18:56432118-56432357:56469532-56469652:56474018-56474130:+	chr18:56469532-56469652	NA	0.971	NA	NA	NA	NA	0.96	NA	NA	NA	NA	NA	NA	NA	NA	NA	NA	NA	NA	NA	NA	0.979	NA	NA
SE	Kat7:chr11:95299978-95300218:95306048-95306196:95310034-95310201:-	chr11:95306048-95306196	NA	NA	NA	NA	NA	NA	NA	NA	NA	NA	NA	0.948	NA	NA	NA	NA	NA	NA	NA	NA	NA	NA	NA	NA
SE	Mad2l2:chr4:148144263-148144358:148144653-148144727:148145103-148145120:+	chr4:148144653-148144727	0.965	0.993	0.964	0.974	0.98	0.89	0.971	NA	0.93	NA	0.881	0.935	NA	0.916	NA	NA	0.99	0.917	NA	0.983	0.973	0.984	NA	NA
SE	Snhg1:chr19:8725013-8725523:8725781-8725826:8726066-8726102:+	chr19:8725781-8725826	NA	NA	NA	NA	NA	NA	NA	NA	0.99	NA	NA	0.996	NA	NA	NA	NA	NA	0.994	NA	NA	NA	NA	NA	NA
SE	Mthfr:chr4:148043424-148043663:148044443-148044554:148048072-148048266:+	chr4:148044443-148044554	NA	0.931	0.922	NA	NA	NA	NA	NA	NA	NA	NA	NA	NA	NA	NA	NA	NA	NA	NA	0.946	NA	NA	NA	NA
SE	Hip1:chr5:135428716-135428824:135429173-135429260:135430190-135430326:-	chr5:135429173-135429260	NA	NA	NA	NA	NA	0.967	NA	NA	NA	NA	NA	NA	NA	NA	NA	NA	NA	NA	NA	NA	NA	NA	NA	NA
SE	Pxylp1:chr9:96856367-96856499:96860790-96861008:96862835-96862982:-	chr9:96860790-96861008	NA	NA	NA	NA	NA	NA	NA	NA	NA	NA	NA	NA	NA	NA	NA	NA	NA	NA	NA	NA	NA	0.549	NA	0.092
SE	Grtp1:chr8:13179322-13179508:13179582-13179755:13186882-13186979:-	chr8:13179582-13179755	NA	NA	NA	NA	NA	NA	NA	NA	NA	NA	NA	NA	NA	NA	NA	NA	NA	NA	NA	NA	0.905	NA	NA	NA
SE	Pcbp2:chr15:102484153-102484240:102485947-102486040:102487087-102487128:+	chr15:102485947-102486040	0.603	0.542	0.558	0.571	0.568	0.621	0.632	0.629	0.564	0.627	0.575	0.606	0.578	0.583	0.527	0.452	0.594	0.592	0.544	0.599	0.544	0.528	0.621	0.558
SE	Pigf:chr17:87020400-87020517:87021858-87021950:87023664-87023913:-	chr17:87021858-87021950	NA	NA	NA	0.969	NA	NA	NA	NA	NA	NA	NA	NA	NA	NA	NA	NA	NA	NA	NA	NA	NA	NA	NA	0.98
SE	Prrc2c:chr1:162720480-162720606:162721444-162721539:162723109-162723281:-	chr1:162721444-162721539	NA	0.961	NA	NA	NA	NA	NA	NA	NA	NA	NA	NA	NA	NA	NA	NA	NA	NA	NA	NA	NA	NA	NA	NA
SE	Wdhd1:chr14:47263438-47263623:47265673-47265858:47266980-47267062:-	chr14:47265673-47265858	NA	NA	NA	NA	NA	NA	NA	NA	NA	NA	NA	NA	NA	NA	NA	NA	NA	NA	NA	0.904	NA	NA	NA	NA
SE	Rnf216:chr5:143092994-143093125:143098378-143098505:143112898-143112980:-	chr5:143098378-143098505	NA	NA	NA	NA	NA	0.971	NA	NA	0.973	0.967	NA	NA	NA	NA	0.978	NA	0.979	NA	NA	NA	NA	NA	0.979	0.947
SE	Gm38431:chr9:21068029-21068117:21073074-21073181:21073263-21073318:-	chr9:21073074-21073181	NA	NA	NA	NA	NA	NA	NA	NA	NA	NA	NA	NA	NA	NA	NA	NA	NA	NA	0.96	NA	NA	0.994	NA	NA
SE	AL935121.1:chr2:120495235-120495247:120495401-120495754:120495864-120496073:+	chr2:120495401-120495754	NA	NA	NA	0.046	NA	NA	NA	NA	NA	NA	NA	NA	NA	NA	NA	NA	NA	0.013	NA	NA	NA	NA	NA	NA
SE	Dut:chr2:125249165-125249257:125250972-125251017:125256848-125256923:+	chr2:125250972-125251017	NA	0.99	0.994	0.991	NA	NA	NA	0.995	NA	NA	NA	NA	0.993	0.995	0.99	NA	0.994	NA	NA	NA	NA	0.991	0.986	NA
SE	Tmem94:chr11:115797366-115797461:115797562-115797656:115797807-115797978:+	chr11:115797562-115797656	NA	NA	NA	NA	NA	NA	NA	NA	NA	NA	NA	NA	NA	0.931	NA	NA	NA	NA	NA	NA	NA	NA	NA	NA
SE	Ddx17:chr15:79541033-79541167:79542486-79542586:79543705-79543856:-	chr15:79542486-79542586	NA	NA	NA	NA	NA	0.994	0.993	NA	0.995	0.992	NA	NA	0.995	NA	NA	NA	0.995	NA	NA	NA	0.983	NA	0.998	NA
SE	Mecr:chr4:131860760-131860863:131861176-131861232:131861775-131861878:+	chr4:131861176-131861232	0.044	0.115	0.159	0.069	0.136	0.04	0.037	0.195	0.127	0.189	0.045	0.057	0.051	0.096	0.086	0.029	0.085	0.055	NA	0.042	0.045	0.142	0.154	0.066
SE	Ccna1:chr3:55048407-55048612:55049677-55049901:55050545-55050638:-	chr3:55049677-55049901	NA	NA	NA	NA	NA	NA	NA	NA	NA	NA	NA	0.444	NA	NA	NA	NA	NA	NA	NA	NA	NA	NA	NA	NA
SE	Mad1l1:chr5:140307590-140307770:140310594-140310735:140314989-140315152:-	chr5:140310594-140310735	NA	NA	0.976	NA	NA	NA	0.951	NA	NA	NA	NA	NA	NA	NA	0.979	NA	NA	NA	0.788	NA	NA	NA	NA	NA
SE	Cers2:chr3:95321335-95321386:95321574-95321667:95321830-95321880:+	chr3:95321574-95321667	NA	NA	NA	NA	NA	NA	NA	NA	NA	NA	NA	NA	NA	NA	NA	NA	NA	NA	NA	NA	0.997	NA	NA	NA
SE	Anks1:chr17:27988719-27988916:27991307-27991400:27995933-27996054:+	chr17:27991307-27991400	NA	NA	NA	NA	NA	NA	NA	NA	NA	NA	0.967	NA	NA	0.93	NA	NA	NA	NA	NA	NA	0.947	NA	NA	NA
SE	Mbnl3:chrX:51131428-51131620:51139203-51139368:51205773-51205832:-	chrX:51139203-51139368	NA	NA	NA	NA	NA	NA	NA	NA	NA	NA	NA	NA	0.487	NA	NA	NA	NA	NA	NA	NA	NA	NA	NA	NA
SE	Brd8:chr18:34598614-34600241:34602202-34602247:34602671-34602776:-	chr18:34602202-34602247	NA	0.948	NA	NA	0.988	NA	0.973	0.985	NA	NA	NA	NA	NA	NA	NA	0.765	NA	NA	0.984	0.901	NA	NA	NA	0.968
SE	Upf1:chr8:70337016-70337230:70337488-70337632:70338205-70338320:-	chr8:70337488-70337632	NA	NA	NA	NA	NA	NA	NA	NA	NA	NA	NA	NA	NA	0.992	NA	NA	NA	NA	NA	NA	NA	NA	NA	NA
RI	Trappc6a:chr7:19514421-19514539:19514421-19515090:19515006-19515090:+	chr7:19514539-19515006	0.032	0.046	0.05	0.056	0.063	0.06	0.03	0.082	0.066	0.032	0.057	0.072	0.064	0.054	0.022	0.237	0.034	0.093	0.034	0.058	0.037	0.021	0.023	0.015
SE	Paqr3:chr5:97102141-97103515:97108165-97108328:97111258-97111443:-	chr5:97108165-97108328	NA	NA	NA	NA	NA	NA	NA	NA	NA	NA	NA	NA	NA	NA	0.765	NA	NA	NA	NA	NA	NA	NA	NA	NA
A5SS	Alas1:chr9:106238074-106238239:106237968-106238239:106236439-106236708:-	chr9:106237968-106238074	0.03	0.072	0.046	0.036	0.035	0.027	0.026	0.023	0.011	0.046	0.021	0.006	0.025	0.033	0.048	NA	0.033	0.022	NA	0.038	0.029	NA	0.017	0.016
SE	Wdr31:chr4:62458385-62458883:62460321-62460422:62460519-62460664:-	chr4:62460321-62460422	NA	NA	NA	NA	NA	NA	NA	0.749	NA	NA	NA	NA	NA	NA	NA	NA	NA	NA	NA	NA	NA	NA	NA	NA
SE	Ehd4:chr2:120127591-120127689:120136898-120137075:120154239-120154462:-	chr2:120136898-120137075	NA	NA	0.984	NA	NA	NA	NA	NA	NA	NA	NA	NA	NA	0.962	NA	NA	0.989	NA	NA	NA	NA	0.985	NA	NA
RI	Jak3:chr8:71679558-71679844:71679558-71680557:71680434-71680557:+	chr8:71679844-71680434	0.377	0.239	0.346	0.296	0.358	0.518	0.421	0.193	0.259	0.414	0.182	0.455	0.134	0.296	0.168	NA	0.241	0.152	0.377	0.508	0.377	0.297	0.361	0.143
SE	Rangap1:chr15:81717789-81718922:81720606-81720666:81721898-81722026:-	chr15:81720606-81720666	0.984	NA	NA	NA	NA	NA	NA	NA	NA	NA	NA	NA	NA	NA	NA	NA	NA	NA	NA	NA	NA	0.993	NA	NA
SE	Xpo7:chr14:70704663-70704757:70707286-70707433:70766511-70766550:-	chr14:70707286-70707433	NA	NA	NA	NA	NA	NA	NA	NA	NA	NA	NA	0.988	NA	NA	NA	NA	NA	NA	NA	NA	NA	0.963	0.991	NA
SE	Ptgr2:chr12:84295216-84295335:84298010-84298202:84302236-84302407:+	chr12:84298010-84298202	NA	NA	NA	0.996	NA	NA	NA	NA	NA	NA	0.997	NA	NA	NA	NA	NA	NA	NA	NA	0.989	NA	0.994	NA	NA
SE	Psmd13:chr7:140886801-140886845:140887018-140887105:140889304-140889476:+	chr7:140887018-140887105	NA	NA	NA	NA	NA	NA	NA	NA	NA	NA	NA	NA	NA	NA	NA	NA	NA	NA	0.993	NA	NA	NA	NA	NA
SE	Ccdc171:chr4:83554693-83554884:83557898-83558030:83580747-83580894:+	chr4:83557898-83558030	NA	0.864	NA	0.443	NA	0.426	NA	NA	NA	0.65	0.66	0.347	NA	NA	NA	0.532	NA	0.614	NA	0.788	NA	NA	0.854	NA
SE	Smyd5:chr6:85440105-85440175:85440639-85440744:85441559-85441622:+	chr6:85440639-85440744	NA	0.984	0.981	NA	0.968	NA	NA	NA	NA	NA	NA	NA	NA	NA	0.967	NA	0.945	0.976	0.955	NA	NA	NA	0.981	0.982
RI	Exosc2:chr2:31675838-31675904:31675838-31676736:31676667-31676736:+	chr2:31675904-31676667	0.128	0.065	0.136	0.103	0.104	0.053	0.09	0.091	0.114	0.042	0.138	0.144	0.08	0.07	0.043	0.182	0.089	0.077	0.076	0.155	0.234	0.089	0.065	0.119
SE	Snx13:chr12:35082868-35082971:35085938-35086028:35086862-35086984:+	chr12:35085938-35086028	NA	NA	NA	0.945	NA	NA	NA	NA	NA	NA	NA	NA	NA	NA	NA	NA	NA	NA	NA	NA	NA	NA	NA	NA
SE	Osbpl3:chr6:50336214-50336345:50344873-50345030:50351843-50351957:-	chr6:50344873-50345030	NA	NA	NA	NA	NA	NA	NA	NA	0.82	NA	NA	NA	NA	NA	NA	NA	NA	NA	NA	NA	NA	NA	NA	NA
SE	Ythdc2:chr18:44830151-44830242:44834458-44834658:44837340-44837507:+	chr18:44834458-44834658	NA	NA	NA	NA	NA	NA	NA	NA	NA	NA	NA	NA	NA	NA	NA	NA	0.532	NA	NA	NA	NA	NA	0.857	0.842
SE	Nfe2l1:chr11:96817413-96820516:96821250-96821409:96822103-96822319:-	chr11:96821250-96821409	NA	0.99	0.997	0.992	NA	NA	0.993	0.993	NA	NA	NA	0.99	NA	0.99	0.994	NA	0.994	NA	NA	0.984	NA	0.989	NA	0.987
SE	Akr1e1:chr13:4590749-4593298:4593561-4593644:4595070-4595154:-	chr13:4593561-4593644	NA	NA	NA	NA	NA	0.991	NA	NA	NA	NA	NA	NA	NA	NA	NA	NA	NA	NA	NA	NA	NA	NA	NA	NA
A5SS	Zc3h15:chr2:83658529-83658586:83658529-83658621:83660057-83660240:+	chr2:83658586-83658621	NA	NA	0.994	NA	NA	NA	NA	NA	NA	NA	NA	0.98	NA	NA	NA	NA	0.995	0.994	NA	NA	0.98	NA	NA	NA
SE	Cbfb:chr8:105171305-105171392:105178592-105178709:105194474-105194535:+	chr8:105178592-105178709	NA	NA	0.992	0.993	NA	NA	NA	NA	NA	NA	0.994	NA	NA	NA	NA	NA	NA	NA	NA	NA	NA	NA	NA	0.992
SE	Atp6ap2:chrX:12594760-12594891:12596155-12596287:12604866-12604962:+	chrX:12596155-12596287	NA	NA	NA	NA	NA	NA	NA	NA	NA	NA	NA	NA	NA	NA	NA	NA	NA	NA	NA	NA	NA	NA	NA	0.998
A5SS	Wdr45:chrX:7726197-7726292:7726197-7726316:7726685-7726765:+	chrX:7726292-7726316	0.027	0.087	0.086	0.009	0.071	0.029	0.032	0.016	0.051	0.027	0.028	0.054	0.007	0.031	0.025	NA	0.089	0.06	0.064	0.115	0.11	0.055	0.051	0.043
SE	Ttc37:chr13:76108192-76108283:76111672-76111816:76112174-76112266:+	chr13:76111672-76111816	NA	NA	NA	NA	NA	NA	NA	NA	0.912	NA	NA	NA	NA	0.95	NA	NA	NA	NA	0.959	NA	NA	NA	0.969	NA
SE	Rfwd3:chr8:111283274-111283389:111288057-111288149:111288228-111288411:-	chr8:111288057-111288149	NA	NA	NA	NA	NA	0.988	NA	NA	NA	NA	NA	NA	NA	NA	NA	NA	NA	NA	NA	NA	NA	NA	NA	NA
SE	Papola:chr12:105784693-105784914:105800683-105800750:105804926-105805008:+	chr12:105800683-105800750	NA	NA	NA	NA	0.947	NA	NA	NA	NA	NA	NA	NA	NA	NA	NA	NA	NA	NA	NA	NA	NA	NA	NA	NA
SE	Agtpbp1:chr13:59453849-59454680:59460468-59460629:59461996-59462173:-	chr13:59460468-59460629	NA	NA	NA	0.92	0.901	NA	NA	NA	NA	0.941	NA	NA	NA	NA	NA	NA	NA	NA	NA	NA	NA	NA	NA	NA
SE	Lrrc40:chr3:158051696-158051839:158052763-158052936:158054785-158054831:+	chr3:158052763-158052936	NA	NA	0.939	NA	NA	NA	NA	NA	NA	NA	NA	NA	NA	NA	NA	NA	NA	NA	NA	NA	NA	NA	NA	NA
SE	Kmt2e:chr5:23500255-23500344:23500450-23500530:23500726-23500812:+	chr5:23500450-23500530	NA	NA	NA	NA	NA	NA	0.958	NA	NA	NA	NA	NA	NA	NA	NA	NA	NA	NA	NA	NA	NA	NA	NA	NA
SE	Nepro:chr16:44730119-44730197:44731331-44731696:44732057-44732119:+	chr16:44731331-44731696	0.905	NA	0.932	NA	NA	NA	NA	NA	NA	NA	NA	NA	0.79	NA	NA	NA	NA	NA	NA	NA	NA	NA	NA	NA
SE	Mlycd:chr8:119394877-119395470:119401480-119401593:119407555-119407705:+	chr8:119401480-119401593	0.935	NA	NA	NA	NA	NA	NA	NA	NA	NA	NA	NA	0.494	NA	NA	NA	NA	NA	NA	NA	NA	NA	NA	NA
SE	Vstm2b:chr7:40900128-40900188:40900775-40900895:40901249-40901279:+	chr7:40900775-40900895	NA	0.124	0.229	NA	NA	NA	NA	NA	NA	NA	NA	NA	NA	NA	0.1	0.286	0.111	NA	0.161	NA	NA	0.246	NA	0.384
SE	Akip1:chr7:109703945-109704170:109704950-109705031:109707397-109707511:+	chr7:109704950-109705031	0.975	NA	0.979	NA	NA	NA	NA	NA	NA	0.957	NA	0.956	NA	NA	NA	NA	NA	0.969	NA	NA	NA	0.988	NA	NA
A3SS	Traf7:chr17:24518741-24518794:24518741-24518799:24519130-24519246:-	chr17:24518794-24518799	0.877	0.972	0.949	0.96	0.967	0.985	0.933	0.916	0.961	0.977	0.924	0.952	0.977	NA	0.948	NA	0.947	0.969	0.966	NA	0.991	0.95	0.914	0.949
SE	Fam13b:chr18:34462960-34463009:34473549-34473685:34486978-34487139:-	chr18:34473549-34473685	NA	NA	NA	NA	NA	NA	NA	NA	NA	NA	NA	NA	NA	NA	NA	NA	0.985	NA	NA	NA	NA	NA	NA	NA
SE	Chrnb1:chr11:69794968-69795013:69795594-69795734:69795821-69795943:-	chr11:69795594-69795734	0.901	NA	NA	NA	0.955	NA	NA	NA	0.8	0.912	NA	NA	NA	NA	NA	NA	NA	NA	NA	0.945	NA	0.936	NA	NA
SE	Efcab5:chr11:77129852-77130009:77132001-77132216:77134818-77134911:-	chr11:77132001-77132216	NA	NA	NA	NA	NA	NA	NA	NA	NA	NA	0.076	NA	NA	NA	NA	NA	NA	NA	NA	NA	NA	NA	NA	NA
SE	Hsp90b1:chr10:86695476-86695542:86695659-86695737:86695825-86695963:-	chr10:86695659-86695737	NA	NA	NA	NA	NA	NA	0.999	NA	NA	NA	NA	NA	NA	NA	NA	NA	NA	NA	NA	NA	NA	NA	NA	0.999
SE	Pias2:chr18:77126856-77126991:77128955-77129061:77130049-77130123:+	chr18:77128955-77129061	NA	NA	0.986	NA	NA	NA	NA	NA	NA	NA	NA	NA	NA	NA	NA	NA	NA	NA	NA	NA	NA	NA	NA	NA
SE	Dst:chr1:34303420-34303531:34306527-34306651:34307329-34307592:+	chr1:34306527-34306651	NA	NA	NA	NA	NA	NA	NA	NA	NA	NA	NA	NA	NA	NA	0.994	NA	NA	NA	NA	NA	NA	NA	NA	NA
SE	Ppfia4:chr1:134296782-134298828:134299025-134299136:134299290-134299468:-	chr1:134299025-134299136	0.067	NA	NA	0.044	NA	NA	0.076	NA	0.03	NA	NA	NA	NA	NA	0.072	NA	0.223	NA	NA	0.026	0.018	NA	NA	NA
SE	Smc6:chr12:11271728-11271871:11276259-11276365:11279604-11279727:+	chr12:11276259-11276365	NA	0.719	0.816	0.888	0.751	0.949	0.849	0.867	0.856	0.907	NA	0.856	0.875	0.81	0.888	0.886	0.925	0.916	0.97	NA	0.9	0.771	0.947	0.874
RI	Phf12:chr11:78024812-78024867:78024812-78025086:78024960-78025086:+	chr11:78024867-78024960	NA	NA	NA	0.967	0.913	NA	NA	0.945	NA	NA	NA	NA	0.905	0.927	NA	NA	NA	NA	0.896	0.923	0.864	0.724	0.967	0.837
SE	Ash1l:chr3:89072445-89072612:89074724-89074765:89075975-89076277:+	chr3:89074724-89074765	NA	NA	NA	NA	NA	NA	NA	NA	NA	NA	NA	NA	NA	NA	NA	NA	NA	NA	NA	NA	NA	NA	NA	0.962
RI	Aldh6a1:chr12:84442070-84442145:84442070-84443788:84443728-84443788:-	chr12:84442145-84443728	0.02	0.02	0.025	0.034	0.035	0.052	0.029	0.04	0.028	0.027	0.025	0.044	0.059	0.048	0.025	0.026	0.042	0.041	0.027	0.026	0.029	0.027	0.041	0.035
SE	Ulk2:chr11:61834779-61834953:61841298-61841331:61851061-61851103:-	chr11:61841298-61841331	NA	NA	NA	NA	NA	NA	NA	NA	NA	NA	NA	NA	NA	NA	NA	NA	NA	NA	NA	0.945	NA	NA	NA	NA
SE	Clca3b:chr3:144827911-144828136:144836563-144836664:144837691-144837869:-	chr3:144836563-144836664	NA	NA	0.728	NA	NA	NA	NA	NA	NA	NA	NA	NA	NA	NA	NA	NA	NA	NA	NA	NA	NA	0.761	NA	NA
A3SS	Col27a1:chr4:63313425-63313479:63312689-63313479:63309521-63309629:+	chr4:63312689-63313425	0.086	0.034	0.048	0.119	0.043	0.04	0.019	0.037	0.054	0.067	0.047	0.036	0.049	0.013	0.034	NA	0.023	NA	NA	0.058	0.158	0.006	0.059	0.005
SE	Smpd4:chr16:17619388-17619434:17620711-17620762:17621441-17621525:+	chr16:17620711-17620762	NA	0.034	NA	NA	NA	NA	NA	NA	NA	NA	NA	NA	NA	NA	NA	NA	NA	NA	NA	NA	NA	NA	NA	NA
SE	Odf2:chr2:29892185-29892276:29893037-29893154:29893443-29893512:+	chr2:29893037-29893154	0.842	0.947	0.914	0.737	0.791	0.95	NA	0.91	0.928	NA	NA	0.853	0.963	0.94	NA	NA	0.944	0.733	NA	0.925	NA	NA	0.876	NA
SE	Pard3:chr8:127277020-127277201:127324040-127324172:127357274-127357366:+	chr8:127324040-127324172	NA	NA	NA	NA	0.972	NA	NA	NA	NA	NA	NA	NA	NA	NA	NA	NA	NA	NA	NA	NA	NA	NA	NA	NA
SE	Paqr3:chr5:97097478-97097569:97099545-97099743:97103359-97103515:-	chr5:97099545-97099743	NA	0.947	NA	NA	NA	NA	NA	NA	NA	NA	NA	NA	NA	NA	NA	NA	NA	NA	NA	NA	NA	NA	0.885	NA
SE	Uba2:chr7:34163153-34163218:34164384-34164455:34165401-34165485:-	chr7:34164384-34164455	NA	NA	NA	NA	NA	NA	NA	NA	NA	NA	NA	NA	NA	NA	NA	NA	NA	NA	NA	NA	NA	NA	0.996	NA
SE	Pigk:chr3:152714099-152714227:152717061-152717115:152722484-152722576:+	chr3:152717061-152717115	NA	NA	NA	NA	NA	NA	NA	NA	NA	NA	NA	NA	NA	NA	NA	NA	NA	NA	NA	NA	NA	0.998	NA	NA
SE	Eef1akmt1:chr14:57558033-57558116:57565921-57566084:57571542-57571569:-	chr14:57565921-57566084	NA	NA	0.988	NA	0.971	0.97	NA	NA	NA	NA	NA	NA	NA	0.946	NA	NA	0.896	NA	NA	NA	NA	NA	NA	0.989
SE	Fbxo48:chr11:16951374-16951431:16952255-16952464:16953141-16953681:+	chr11:16952255-16952464	NA	NA	NA	0.555	NA	NA	NA	NA	NA	NA	NA	NA	NA	NA	NA	NA	0.625	NA	NA	NA	NA	NA	NA	NA
A3SS	Got2:chr8:95866820-95866971:95866820-95867207:95869471-95869637:-	chr8:95866971-95867207	NA	NA	NA	NA	NA	NA	NA	NA	NA	NA	NA	NA	0.003	NA	NA	NA	NA	NA	NA	NA	NA	NA	NA	0.007
SE	Adgrb1:chr15:74574101-74574168:74575838-74575924:74580564-74580736:+	chr15:74575838-74575924	NA	NA	NA	NA	NA	NA	NA	NA	NA	NA	0.936	NA	NA	NA	NA	NA	NA	NA	NA	NA	NA	NA	NA	NA
SE	Pitpnm2:chr5:124125298-124125463:124126354-124126504:124127176-124127347:-	chr5:124126354-124126504	0.218	0.599	0.915	0.363	0.548	0.666	0.563	0.391	0.389	0.477	0.32	NA	0.272	0.519	0.846	NA	0.499	0.368	NA	0.415	0.466	0.701	0.416	0.926
SE	Ttll5:chr12:85939325-85939510:85956565-85956720:85996000-85996196:+	chr12:85956565-85956720	NA	NA	0.948	NA	NA	NA	NA	NA	NA	NA	NA	NA	NA	NA	NA	NA	NA	NA	NA	NA	0.959	NA	NA	NA
SE	Sh3pxd2a:chr19:47314034-47314166:47320275-47320320:47343439-47343468:-	chr19:47320275-47320320	0.646	0.195	0.133	0.777	0.561	0.406	0.723	0.18	0.628	0.483	0.45	0.187	0.231	0.512	0.394	NA	0.141	0.714	0.088	0.839	0.776	0.434	0.315	0.113
SE	Rpl36a:chrX:134585700-134586183:134586511-134586578:134587450-134587573:+	chrX:134586511-134586578	NA	NA	NA	0.999	NA	NA	NA	0.999	NA	NA	NA	NA	1	NA	NA	NA	NA	NA	NA	NA	0.998	NA	NA	NA
A3SS	Ccnd3:chr17:47593653-47593852:47593608-47593852:47578708-47578792:+	chr17:47593608-47593653	NA	NA	NA	0.993	NA	0.968	0.982	0.989	NA	0.99	NA	0.964	0.989	0.981	NA	NA	NA	0.974	NA	NA	NA	NA	0.975	NA
SE	Wrn:chr8:33335996-33336146:33342976-33343125:33343546-33343692:-	chr8:33342976-33343125	NA	NA	NA	NA	NA	NA	NA	0.95	NA	0.898	NA	0.869	NA	NA	NA	NA	NA	NA	NA	NA	NA	NA	NA	NA
A3SS	Enpp1:chr10:24664554-24664601:24664554-24664627:24664910-24664976:-	chr10:24664601-24664627	NA	0.817	0.652	0.872	NA	0.961	NA	0.899	0.895	0.927	NA	0.816	0.963	0.958	NA	NA	0.773	0.946	NA	0.749	NA	0.665	0.959	NA
SE	Rps2:chr17:24720109-24720452:24720533-24720731:24720968-24721302:+	chr17:24720533-24720731	NA	1	NA	NA	NA	NA	NA	NA	NA	NA	NA	NA	NA	NA	NA	NA	NA	NA	NA	NA	NA	NA	NA	NA
A5SS	Usp35:chr7:97315086-97315178:97315079-97315178:97314733-97314927:-	chr7:97315079-97315086	0.323	0.741	NA	0.761	0.656	NA	0.589	0.323	NA	NA	0.522	0.241	0.323	NA	NA	NA	NA	0.389	NA	0.29	0.323	NA	0.389	NA
SE	Secisbp2l:chr2:125773175-125773500:125775552-125775731:125782598-125782870:-	chr2:125775552-125775731	NA	NA	NA	0.949	0.992	0.975	NA	NA	0.973	NA	NA	0.993	NA	0.971	0.948	NA	0.92	NA	0.976	0.981	NA	NA	0.988	0.988
SE	Ppp4r3a:chr12:101044489-101044659:101045525-101045681:101049659-101049818:-	chr12:101045525-101045681	0.152	0.186	0.134	0.158	0.163	0.317	0.185	0.064	0.225	0.234	0.098	0.058	0.384	0.176	0.132	0.126	0.192	0.104	0.133	0.137	0.098	0.118	0.172	0.053
A3SS	Npas3:chr12:53640459-53640536:53640453-53640536:53501033-53501278:+	chr12:53640453-53640459	NA	0.419	0.419	NA	NA	NA	NA	NA	NA	NA	NA	NA	NA	NA	0.49	NA	0.419	NA	0.926	NA	NA	0.638	NA	0.445
RI	Clcn3:chr8:60922789-60923188:60922789-60927418:60927231-60927418:-	chr8:60923188-60927231	0.066	0.13	0.046	0.104	0.075	0.197	0.098	0.113	0.154	0.276	0.062	0.085	0.133	0.199	0.046	NA	0.135	0.121	0.129	0.141	0.082	0.065	0.123	0.064
RI	Adamts10:chr17:33538067-33538173:33538067-33538410:33538263-33538410:+	chr17:33538173-33538263	0.72	0.609	0.555	0.675	0.522	0.818	0.784	0.624	0.705	0.598	0.624	0.607	0.55	0.599	0.517	NA	0.679	0.659	0.438	0.527	0.744	0.421	0.648	0.599
SE	Rftn2:chr1:55204182-55204392:55206335-55206615:55211149-55211261:-	chr1:55206335-55206615	NA	NA	NA	NA	NA	NA	NA	NA	NA	NA	NA	NA	NA	NA	NA	NA	NA	NA	0.839	NA	NA	NA	NA	NA
SE	Alg9:chr9:50800118-50800241:50801937-50802092:50805301-50805431:+	chr9:50801937-50802092	NA	NA	NA	NA	NA	NA	NA	NA	NA	NA	NA	NA	NA	NA	NA	NA	0.981	NA	NA	NA	0.985	NA	NA	NA
SE	Cacna2d1:chr5:16320083-16320158:16322538-16322595:16326326-16326383:+	chr5:16322538-16322595	NA	NA	NA	0.566	NA	NA	NA	NA	NA	NA	NA	NA	NA	NA	NA	NA	NA	NA	NA	NA	NA	NA	NA	0.153
SE	Ssbp4:chr8:70599839-70599899:70600008-70600062:70600395-70600485:-	chr8:70600008-70600062	0.158	0.034	0.098	0.116	0.077	0.043	0.066	0.097	0.07	0.013	0.079	0.134	0.177	0.076	0.055	NA	0.112	0.051	0.045	0.078	0.088	0.023	0.049	0.044
SE	Rbm39:chr2:156167537-156167591:156167684-156167750:156172827-156173022:-	chr2:156167684-156167750	NA	NA	0.997	NA	NA	NA	NA	NA	NA	NA	0.998	NA	NA	NA	NA	NA	NA	0.998	NA	NA	NA	NA	NA	NA
SE	Phldb2:chr16:45748726-45748812:45757098-45757245:45758116-45758207:-	chr16:45757098-45757245	NA	0.99	NA	NA	NA	NA	NA	NA	NA	NA	NA	NA	NA	NA	0.984	NA	0.995	NA	NA	NA	NA	0.995	NA	0.966
SE	Kremen1:chr11:5209938-5210092:5215406-5215531:5238410-5238448:-	chr11:5215406-5215531	NA	0.99	0.975	0.985	0.99	0.972	NA	0.95	0.983	NA	NA	0.98	NA	0.947	0.989	NA	0.981	NA	0.977	0.959	0.966	0.978	NA	0.987
SE	Tns3:chr11:8518198-8518303:8519122-8519188:8519440-8519570:-	chr11:8519122-8519188	NA	NA	NA	NA	0.986	NA	NA	NA	NA	NA	NA	NA	NA	NA	NA	NA	NA	NA	NA	NA	NA	NA	NA	NA
SE	Zbtb18:chr1:177443223-177443341:177443984-177444092:177447088-177447145:+	chr1:177443984-177444092	NA	0.076	0.199	NA	NA	0.162	0.659	NA	NA	NA	NA	NA	0.403	NA	0.465	NA	0.635	NA	NA	NA	NA	NA	NA	0.367
SE	4930481A15Rik:chr19:5406739-5407083:5415011-5415112:5415606-5415812:+	chr19:5415011-5415112	0.61	NA	NA	0.373	0.791	0.676	0.604	0.827	0.82	0.838	0.787	0.915	0.614	0.868	NA	NA	0.843	0.736	NA	NA	NA	NA	NA	NA
SE	Col5a2:chr1:45384961-45385069:45386832-45386886:45388212-45388320:-	chr1:45386832-45386886	NA	NA	NA	NA	NA	NA	0.998	NA	NA	NA	NA	NA	NA	NA	NA	NA	NA	NA	NA	NA	NA	NA	NA	NA
SE	Ubap1:chr4:41371724-41371849:41387174-41387357:41388095-41388197:+	chr4:41387174-41387357	NA	0.988	NA	NA	NA	NA	NA	NA	NA	NA	0.959	NA	NA	NA	NA	NA	NA	NA	NA	NA	NA	NA	NA	NA
SE	Dtnbp1:chr13:44993684-44993738:44995830-44996006:45001380-45001647:-	chr13:44995830-44996006	NA	NA	NA	NA	NA	NA	0.647	NA	0.478	NA	NA	NA	NA	0.579	NA	NA	NA	NA	NA	0.534	NA	NA	NA	0.155
SE	Fam149b:chr14:20351311-20351416:20363262-20363450:20374329-20374454:+	chr14:20363262-20363450	NA	NA	NA	NA	0.949	NA	NA	NA	NA	NA	NA	NA	NA	NA	NA	NA	NA	NA	NA	NA	NA	NA	NA	NA
A3SS	Hax1:chr3:89997386-89997565:89997386-89997574:89997737-89998003:-	chr3:89997565-89997574	0.955	0.857	0.969	0.867	0.933	0.968	0.934	0.982	0.878	0.954	0.943	0.966	0.942	0.967	0.973	NA	0.978	0.948	0.961	0.957	0.992	0.956	0.892	0.966
SE	Ndufs1:chr1:63143688-63143922:63146485-63146569:63147119-63147192:-	chr1:63146485-63146569	NA	NA	NA	NA	NA	NA	NA	NA	NA	NA	NA	NA	NA	NA	NA	NA	NA	NA	NA	NA	0.003	NA	NA	NA
SE	Ptpn2:chr18:67695623-67695724:67711836-67711927:67724441-67724573:-	chr18:67711836-67711927	NA	NA	NA	NA	NA	NA	NA	NA	NA	NA	NA	NA	NA	NA	NA	NA	NA	NA	0.914	NA	0.992	NA	NA	NA
SE	Cul2:chr18:3431483-3431585:3433993-3434110:3434843-3435385:+	chr18:3433993-3434110	NA	NA	0.98	NA	NA	NA	0.991	NA	0.991	NA	NA	NA	NA	NA	NA	NA	NA	NA	NA	NA	NA	NA	0.947	NA
SE	Krt80:chr15:101351673-101351799:101352176-101352341:101358646-101358742:-	chr15:101352176-101352341	NA	NA	NA	NA	NA	NA	NA	NA	0.857	NA	NA	NA	NA	NA	NA	NA	NA	NA	NA	NA	NA	NA	NA	NA
A3SS	Mrps21:chr3:95870493-95870615:95870493-95870642:95871452-95871519:-	chr3:95870615-95870642	0.214	0.181	0.186	0.148	NA	0.195	0.112	0.244	0.235	0.193	0.192	0.27	0.126	0.204	0.2	NA	0.216	NA	0.255	0.157	NA	0.188	0.141	0.165
SE	Ccdc171:chr4:83557898-83558030:83580747-83580894:83601607-83601700:+	chr4:83580747-83580894	NA	NA	NA	NA	NA	NA	NA	NA	0.716	NA	NA	NA	NA	NA	NA	NA	NA	0.934	NA	NA	NA	0.834	NA	0.502
SE	Hinfp:chr9:44302409-44302587:44304781-44304848:44305615-44305646:-	chr9:44304781-44304848	NA	NA	NA	0.509	NA	NA	NA	NA	NA	NA	NA	0.341	NA	NA	NA	NA	NA	NA	NA	NA	NA	NA	NA	NA
SE	Dock7:chr4:98991392-98991459:98993646-98993736:99001032-99001202:-	chr4:98993646-98993736	0.555	NA	NA	NA	0.555	0.567	0.624	0.555	NA	NA	NA	0.814	NA	NA	0.555	NA	NA	0.73	NA	NA	NA	NA	NA	NA
SE	Cnot3:chr7:3653510-3653644:3654142-3654199:3655570-3655827:+	chr7:3654142-3654199	NA	NA	NA	NA	NA	NA	NA	NA	NA	NA	NA	NA	NA	NA	NA	NA	NA	NA	NA	0.943	NA	NA	NA	NA
SE	Ist1:chr8:109675375-109676850:109677485-109677686:109678854-109678965:-	chr8:109677485-109677686	NA	NA	NA	NA	NA	NA	NA	NA	NA	NA	NA	NA	NA	NA	NA	NA	NA	NA	NA	NA	NA	0.985	NA	NA
SE	Pja2:chr17:64292838-64293024:64297723-64297909:64308621-64309666:-	chr17:64297723-64297909	0.617	0.731	0.702	0.648	0.569	0.728	0.62	0.765	0.672	0.718	0.64	0.736	0.615	0.641	0.669	0.719	0.655	0.765	0.742	0.678	0.655	0.644	0.645	0.72
SE	Naa16:chr14:79359455-79359528:79369077-79369184:79370001-79370097:-	chr14:79369077-79369184	NA	NA	NA	NA	0.946	NA	NA	NA	NA	NA	NA	NA	NA	NA	NA	NA	NA	NA	NA	NA	NA	NA	NA	NA
A3SS	Gas5:chr1:161038456-161038535:161038224-161038535:161037994-161038037:+	chr1:161038224-161038456	NA	NA	NA	NA	NA	NA	NA	NA	NA	NA	NA	NA	NA	NA	NA	NA	0.997	NA	NA	NA	NA	NA	NA	NA
SE	Fahd2a:chr2:127438112-127438569:127440385-127440602:127444416-127444480:-	chr2:127440385-127440602	NA	NA	0.905	NA	0.934	NA	NA	0.933	0.828	0.87	0.93	0.776	0.963	0.867	NA	NA	0.943	NA	0.449	0.943	0.963	0.943	0.967	0.528
SE	Slit3:chr11:35171572-35171644:35177782-35177854:35234836-35234908:+	chr11:35177782-35177854	0.986	NA	0.997	0.982	NA	NA	NA	NA	0.996	NA	NA	NA	NA	0.995	0.998	NA	NA	0.991	0.993	NA	NA	NA	NA	NA
SE	Phf7:chr14:31240273-31240433:31240858-31241009:31241725-31241827:-	chr14:31240858-31241009	NA	NA	NA	NA	NA	NA	NA	NA	NA	NA	NA	NA	NA	NA	NA	NA	NA	NA	0.665	NA	NA	NA	NA	NA
SE	Mrps22:chr9:98594669-98594813:98596819-98596984:98598134-98598298:-	chr9:98596819-98596984	NA	NA	NA	0.991	NA	NA	NA	NA	NA	NA	NA	NA	NA	NA	NA	NA	NA	NA	NA	NA	NA	NA	NA	NA
SE	Cacna1g:chr11:94463341-94463501:94465820-94465954:94466115-94466227:-	chr11:94465820-94465954	NA	NA	NA	NA	NA	NA	NA	NA	NA	NA	NA	NA	0.858	NA	NA	NA	NA	NA	NA	NA	NA	0.867	NA	NA
SE	Spata24:chr18:35660282-35660353:35660496-35660574:35660791-35660857:-	chr18:35660496-35660574	NA	NA	0.621	NA	0.783	NA	NA	NA	NA	NA	NA	NA	NA	0.887	NA	0.479	NA	NA	NA	NA	NA	NA	0.878	NA
SE	U2surp:chr9:95476106-95476263:95477399-95477522:95479266-95479354:-	chr9:95477399-95477522	NA	NA	NA	NA	NA	NA	0.972	NA	NA	NA	NA	NA	NA	NA	NA	NA	NA	NA	NA	NA	NA	NA	NA	NA
A3SS	Ddhd1:chr14:45610491-45610690:45610491-45610754:45614162-45614269:-	chr14:45610690-45610754	NA	0.972	NA	NA	NA	NA	0.878	NA	0.83	NA	NA	NA	NA	NA	NA	NA	NA	NA	NA	0.963	NA	NA	0.98	NA
SE	Bin1:chr18:32424819-32424967:32429699-32429723:32431982-32432093:+	chr18:32429699-32429723	NA	NA	NA	NA	NA	NA	NA	NA	NA	NA	NA	NA	NA	NA	NA	NA	NA	NA	NA	0.011	NA	NA	NA	NA
SE	Efl1:chr7:82692829-82692996:82697878-82698017:82750791-82750923:+	chr7:82697878-82698017	NA	NA	NA	NA	NA	0.961	NA	NA	NA	NA	NA	0.963	NA	NA	NA	NA	NA	0.906	NA	NA	NA	NA	NA	NA
SE	Ubr4:chr4:139438049-139438161:139440410-139440541:139440644-139440822:+	chr4:139440410-139440541	NA	NA	NA	NA	NA	NA	NA	NA	NA	NA	NA	NA	NA	NA	NA	NA	0.993	NA	NA	NA	NA	NA	NA	NA
SE	Nrg4:chr9:55242060-55242207:55249095-55249169:55280889-55280983:-	chr9:55249095-55249169	NA	NA	NA	NA	0.8	NA	0.401	NA	NA	NA	NA	NA	NA	NA	NA	NA	NA	NA	NA	NA	NA	NA	NA	NA
A5SS	Coq4:chr2:29790456-29790530:29790456-29790559:29795380-29795510:+	chr2:29790530-29790559	NA	0.985	NA	0.976	NA	NA	0.885	0.973	NA	0.866	NA	NA	NA	NA	0.923	NA	0.979	NA	NA	0.96	NA	0.975	0.875	NA
SE	Ccp110:chr7:118731696-118731759:118732393-118732453:118735267-118735786:+	chr7:118732393-118732453	0.833	0.772	0.954	NA	NA	0.416	0.588	0.74	NA	NA	NA	NA	NA	NA	NA	NA	0.781	0.851	NA	0.416	NA	NA	0.877	0.781
SE	Actr10:chr12:70937856-70938031:70940797-70940870:70942258-70942341:+	chr12:70940797-70940870	NA	NA	NA	NA	NA	0.997	NA	NA	NA	NA	NA	NA	NA	NA	NA	NA	NA	NA	NA	NA	NA	NA	NA	NA
SE	Reps2:chrX:162471794-162471856:162512678-162512732:162514278-162514348:-	chrX:162512678-162512732	NA	NA	NA	0.128	0.227	NA	0.688	NA	NA	NA	0.361	NA	NA	NA	NA	NA	NA	NA	NA	NA	0.216	NA	NA	NA
RI	Unc13a:chr8:71662480-71662535:71662480-71662928:71662854-71662928:-	chr8:71662535-71662854	NA	NA	NA	NA	0.203	0.175	0.347	NA	NA	NA	NA	NA	0.21	0.137	0.298	NA	NA	NA	NA	0.185	0.276	0.276	NA	NA
SE	Pgls:chr8:71592175-71592504:71594083-71594191:71594668-71594770:+	chr8:71594083-71594191	NA	NA	NA	NA	0.999	NA	NA	NA	0.997	NA	NA	NA	NA	NA	NA	NA	0.998	NA	NA	NA	NA	NA	NA	0.998
SE	Tmem40:chr6:115736382-115736436:115738947-115739022:115741540-115741672:-	chr6:115738947-115739022	NA	NA	NA	0.47	NA	NA	NA	0.666	NA	NA	NA	NA	NA	0.399	NA	NA	NA	0.666	NA	NA	0.318	NA	NA	NA
SE	Dtna:chr18:23497478-23497703:23535161-23535229:23545685-23545725:+	chr18:23535161-23535229	NA	NA	NA	NA	NA	NA	NA	NA	NA	NA	NA	NA	NA	NA	NA	NA	0.954	NA	NA	NA	NA	NA	NA	NA
SE	Sgip1:chr4:102927189-102927585:102928785-102928912:102956098-102956210:+	chr4:102928785-102928912	NA	NA	NA	NA	NA	NA	NA	NA	NA	NA	NA	NA	NA	NA	NA	NA	NA	NA	NA	NA	NA	NA	NA	0.519
SE	Man2a1:chr17:64636483-64636655:64651195-64651323:64658900-64659074:+	chr17:64651195-64651323	NA	NA	NA	NA	NA	NA	NA	NA	NA	NA	NA	NA	NA	NA	NA	NA	NA	NA	NA	NA	NA	0.996	NA	NA
A3SS	Rtel1:chr2:181354075-181354175:181353976-181354175:181352752-181352848:+	chr2:181353976-181354075	NA	0.947	NA	NA	NA	NA	NA	NA	NA	NA	NA	NA	NA	NA	NA	NA	NA	NA	NA	NA	NA	NA	NA	NA
SE	Shcbp1:chr8:4754219-4754312:4764880-4765089:4767906-4768022:-	chr8:4764880-4765089	NA	NA	NA	NA	NA	NA	NA	NA	NA	NA	NA	NA	NA	NA	NA	NA	NA	NA	NA	NA	NA	NA	0.961	NA
RI	Tra2a:chr6:49245475-49245610:49245475-49246964:49246848-49246964:-	chr6:49245610-49246848	0.452	0.617	0.264	0.453	0.277	0.485	0.173	0.639	0.266	0.477	0.736	0.339	NA	0.186	0.285	NA	0.513	0.367	0.269	0.312	0.75	0.571	0.316	0.214
SE	Lrp10:chr14:54465573-54465709:54467459-54467650:54467763-54467809:+	chr14:54467459-54467650	NA	NA	NA	NA	NA	NA	NA	NA	NA	NA	NA	NA	0.992	NA	NA	NA	NA	NA	NA	NA	NA	NA	NA	NA
SE	Pcnx:chr12:81983467-81983698:81986658-81986759:81987892-81988043:+	chr12:81986658-81986759	NA	NA	NA	NA	NA	NA	NA	0.928	NA	NA	NA	NA	NA	NA	NA	NA	NA	NA	NA	NA	NA	NA	NA	NA
SE	Rnf31:chr14:55594294-55594472:55594922-55595301:55595469-55595760:+	chr14:55594922-55595301	NA	0.937	NA	0.979	NA	0.973	NA	NA	NA	NA	NA	NA	NA	NA	NA	NA	NA	0.968	0.966	NA	NA	NA	NA	NA
SE	Mgat1:chr11:49251549-49251674:49254110-49254215:49260570-49260691:+	chr11:49254110-49254215	NA	NA	NA	NA	NA	NA	NA	NA	NA	NA	NA	NA	NA	NA	NA	NA	NA	NA	NA	NA	NA	0.005	0.003	NA
SE	Taz:chrX:74288450-74288513:74288928-74289019:74289104-74289182:+	chrX:74288928-74289019	0.015	0.11	0.216	0.171	NA	0.062	0.049	NA	0.171	0.022	NA	0.283	NA	0.09	0.482	NA	0.266	NA	NA	0.021	NA	0.332	0.097	0.383
A3SS	Osgin1:chr8:119444958-119446256:119444956-119446256:119443191-119443283:+	chr8:119444956-119444958	NA	NA	NA	0.964	NA	NA	NA	NA	NA	NA	NA	NA	NA	NA	NA	NA	NA	NA	NA	NA	0.93	NA	NA	NA
SE	4930402H24Rik:chr2:130719838-130719975:130727147-130727185:130730788-130730909:-	chr2:130727147-130727185	NA	NA	NA	NA	0.988	NA	NA	NA	NA	NA	NA	NA	0.893	NA	NA	NA	NA	NA	NA	NA	0.989	NA	NA	NA
SE	Xirp1:chr9:120013754-120016034:120016425-120019819:120023433-120023598:-	chr9:120016425-120019819	NA	NA	NA	NA	NA	NA	NA	NA	0.9	NA	NA	NA	NA	NA	NA	NA	NA	NA	NA	NA	NA	NA	NA	NA
SE	Grk2:chr19:4292766-4292840:4294849-4294926:4305901-4306030:-	chr19:4294849-4294926	NA	0.955	0.981	NA	NA	NA	NA	NA	NA	0.956	NA	NA	NA	0.986	NA	NA	NA	NA	NA	NA	NA	0.99	NA	NA
SE	Gen1:chr12:11248214-11248345:11249129-11249210:11250051-11250088:-	chr12:11249129-11249210	NA	NA	NA	NA	NA	0.894	NA	NA	NA	NA	NA	NA	NA	NA	NA	NA	NA	NA	NA	NA	NA	NA	NA	NA
SE	Dpp4:chr2:62378203-62378324:62379096-62379169:62379276-62379329:-	chr2:62379096-62379169	NA	NA	NA	NA	NA	NA	NA	NA	NA	NA	NA	NA	NA	NA	NA	NA	NA	NA	0.981	NA	NA	0.988	NA	NA
SE	Galnt2:chr8:124336573-124336666:124337261-124337345:124338442-124338569:+	chr8:124337261-124337345	NA	0.996	NA	NA	NA	NA	NA	NA	NA	NA	NA	NA	NA	NA	NA	NA	NA	NA	NA	NA	NA	NA	NA	NA
SE	Rnf38:chr4:44143447-44143615:44149024-44149238:44152359-44152553:-	chr4:44149024-44149238	NA	0.985	0.96	0.988	0.968	NA	0.987	NA	NA	NA	NA	NA	0.971	NA	0.976	NA	NA	NA	0.984	NA	0.988	NA	NA	0.968
SE	Gas5:chr1:161037504-161038037:161038224-161038272:161038456-161038478:+	chr1:161038224-161038272	NA	NA	NA	NA	NA	NA	NA	NA	NA	NA	NA	NA	NA	NA	NA	NA	0.998	NA	NA	NA	NA	NA	NA	NA
SE	Cadm4:chr7:24499923-24500058:24500475-24500640:24500731-24500822:+	chr7:24500475-24500640	NA	NA	NA	NA	NA	NA	NA	NA	NA	NA	NA	NA	NA	NA	0.99	NA	NA	NA	NA	NA	NA	NA	NA	NA
SE	Cd164:chr10:41519413-41519700:41521917-41522007:41524106-41524145:+	chr10:41521917-41522007	NA	NA	NA	NA	NA	NA	NA	NA	NA	NA	NA	NA	NA	NA	NA	NA	NA	NA	NA	0.994	NA	NA	NA	NA
SE	Zscan26:chr13:21448166-21448484:21449273-21449333:21449440-21449516:-	chr13:21449273-21449333	0.943	NA	NA	NA	0.963	NA	NA	NA	NA	NA	NA	NA	NA	NA	NA	NA	NA	NA	NA	NA	NA	NA	NA	NA
SE	B230307C23Rik:chr16:98010118-98010168:98015665-98015719:98031242-98031436:+	chr16:98015665-98015719	NA	NA	NA	NA	NA	NA	NA	NA	NA	NA	NA	NA	NA	NA	NA	0.672	NA	NA	NA	NA	NA	NA	NA	NA
SE	Prdm5:chr6:65859356-65859478:65862914-65862994:65869180-65869265:+	chr6:65862914-65862994	NA	NA	NA	NA	NA	0.981	NA	NA	NA	NA	NA	NA	NA	NA	NA	NA	NA	NA	NA	NA	NA	0.946	NA	NA
SE	Dtl:chr1:191563110-191563176:191565318-191565350:191568290-191568411:-	chr1:191565318-191565350	NA	NA	NA	NA	NA	NA	0.292	NA	NA	NA	NA	NA	NA	NA	NA	NA	NA	NA	NA	NA	NA	NA	NA	NA
SE	Atad3a:chr4:155749156-155749208:155753566-155753636:155753881-155754047:-	chr4:155753566-155753636	NA	NA	NA	NA	NA	NA	NA	NA	NA	NA	0.965	NA	NA	NA	NA	NA	NA	NA	NA	NA	NA	NA	NA	NA
SE	Slc15a4:chr5:127604110-127604188:127604537-127604648:127608771-127609061:-	chr5:127604537-127604648	NA	NA	NA	NA	NA	0.934	NA	NA	0.967	NA	NA	0.88	NA	NA	NA	NA	NA	NA	NA	0.863	0.976	NA	NA	NA
SE	Fam45a:chr19:60821206-60821355:60822294-60822406:60825830-60825931:+	chr19:60822294-60822406	NA	NA	NA	NA	NA	NA	NA	NA	NA	NA	NA	NA	NA	0.984	NA	NA	NA	0.983	NA	NA	NA	NA	NA	NA
SE	Pmm1:chr15:81951107-81951612:81951923-81952039:81952724-81952800:-	chr15:81951923-81952039	NA	NA	NA	NA	NA	NA	NA	NA	NA	NA	NA	NA	NA	NA	NA	NA	NA	NA	NA	NA	0.989	NA	NA	0.997
SE	Col18a1:chr10:77071603-77071675:77072026-77072062:77072941-77072968:-	chr10:77072026-77072062	NA	NA	NA	NA	NA	NA	NA	NA	0.996	NA	NA	NA	NA	NA	NA	NA	NA	NA	NA	NA	NA	NA	NA	NA
SE	Taf1d:chr9:15306257-15306283:15306872-15306990:15307727-15307821:+	chr9:15306872-15306990	0.271	0.207	0.202	0.085	0.386	0.358	0.133	0.199	0.394	0.383	0.448	0.239	0.199	0.205	0.237	NA	0.157	0.242	0.122	0.394	NA	0.377	0.244	0.173
SE	Zdhhc20:chr14:57846920-57847062:57850144-57850180:57856609-57856730:-	chr14:57850144-57850180	NA	NA	NA	NA	NA	NA	NA	NA	NA	NA	NA	NA	NA	NA	NA	NA	NA	NA	NA	NA	NA	NA	NA	0.023
SE	Ythdf3:chr3:16189477-16189563:16203825-16205424:16213954-16215006:+	chr3:16203825-16205424	0.987	NA	0.993	NA	0.992	0.993	0.977	NA	NA	NA	0.988	NA	NA	NA	0.992	NA	NA	0.993	NA	NA	NA	NA	NA	0.978
SE	Dnah7b:chr1:46223071-46223227:46224608-46224777:46225765-46225892:+	chr1:46224608-46224777	NA	NA	NA	NA	NA	NA	NA	NA	NA	NA	NA	NA	0.584	NA	NA	NA	NA	0.621	NA	NA	NA	0.888	NA	NA
SE	Npnt:chr3:132906694-132906829:132908342-132908462:132909895-132910015:-	chr3:132908342-132908462	NA	NA	NA	NA	NA	NA	NA	NA	NA	NA	0.998	NA	NA	NA	NA	NA	NA	NA	NA	NA	NA	NA	NA	NA
SE	Pak3:chrX:143671012-143671043:143672601-143672893:143693286-143693488:+	chrX:143672601-143672893	NA	NA	NA	NA	NA	NA	NA	NA	NA	NA	NA	NA	NA	NA	NA	NA	NA	NA	NA	NA	NA	NA	0.503	NA
SE	4930412C18Rik:chr4:9770650-9770821:9776036-9776197:9782625-9782739:+	chr4:9776036-9776197	NA	NA	NA	0.325	NA	NA	NA	NA	NA	NA	NA	NA	NA	NA	NA	NA	NA	NA	NA	NA	NA	NA	NA	NA
SE	Secisbp2:chr13:51677140-51677279:51678833-51678990:51679732-51679953:+	chr13:51678833-51678990	NA	NA	NA	0.932	NA	NA	NA	NA	NA	0.913	NA	NA	NA	NA	0.877	NA	NA	NA	NA	NA	NA	NA	NA	NA
A3SS	Vps53:chr11:76113940-76114077:76113940-76114082:76117058-76117201:-	chr11:76114077-76114082	0.983	NA	0.981	0.985	0.989	NA	0.979	0.981	NA	NA	0.989	0.984	NA	0.978	NA	NA	NA	0.984	NA	0.969	NA	0.968	NA	NA
A3SS	Sox6:chr7:115597495-115597616:115597495-115597619:115597817-115597896:-	chr7:115597616-115597619	NA	NA	NA	NA	NA	NA	0.495	NA	NA	NA	NA	NA	NA	NA	NA	NA	NA	NA	NA	NA	NA	NA	NA	NA
SE	Amotl2:chr9:102717667-102717902:102720080-102720876:102723568-102723863:+	chr9:102720080-102720876	NA	NA	NA	NA	NA	NA	NA	NA	NA	NA	0.993	NA	NA	NA	NA	NA	NA	NA	NA	NA	NA	0.999	NA	NA
SE	Kcp:chr6:29502584-29502667:29502777-29502874:29504232-29504309:-	chr6:29502777-29502874	NA	NA	NA	NA	NA	0.891	NA	NA	NA	NA	NA	NA	NA	NA	NA	NA	NA	NA	NA	NA	NA	NA	NA	NA
SE	Cct3:chr3:88305012-88305130:88309160-88309347:88311672-88311822:+	chr3:88309160-88309347	NA	NA	NA	NA	NA	NA	NA	NA	NA	NA	NA	NA	0.998	NA	NA	NA	NA	NA	NA	NA	NA	NA	NA	NA
SE	Supt3:chr17:45003089-45003229:45033237-45033313:45036711-45036824:+	chr17:45033237-45033313	NA	NA	NA	NA	NA	NA	NA	NA	0.922	NA	NA	NA	NA	NA	0.973	NA	NA	NA	NA	NA	NA	NA	NA	NA
A3SS	Cbx7:chr15:79918752-79918825:79918752-79918927:79921371-79921438:-	chr15:79918825-79918927	0.471	0.372	NA	0.485	0.182	0.154	0.354	0.543	0.429	NA	0.295	0.303	0.4	0.302	NA	NA	0.117	0.203	NA	0.436	0.399	0.129	0.322	0.139
SE	Porcn:chrX:8201175-8201276:8201443-8201569:8205564-8205733:-	chrX:8201443-8201569	NA	0.969	NA	NA	NA	0.619	0.884	NA	NA	NA	NA	NA	NA	NA	NA	NA	NA	NA	NA	NA	NA	NA	0.791	NA
SE	Capn7:chr14:31336637-31336983:31340034-31340143:31344441-31344599:+	chr14:31340034-31340143	0.965	NA	NA	NA	NA	NA	0.964	NA	NA	NA	0.988	NA	0.969	NA	0.945	NA	NA	NA	0.958	NA	NA	NA	0.979	NA
SE	Helz:chr11:107549345-107549401:107574937-107575165:107577862-107577899:+	chr11:107574937-107575165	NA	NA	NA	NA	NA	NA	0.958	NA	NA	NA	NA	NA	NA	NA	NA	NA	NA	NA	NA	NA	NA	0.972	NA	NA
SE	Hnrnph3:chr10:63016406-63016542:63017221-63017337:63017523-63017610:-	chr10:63017221-63017337	NA	NA	NA	NA	NA	0.992	NA	NA	0.985	0.985	0.995	0.984	NA	NA	NA	NA	NA	NA	NA	0.993	0.992	NA	NA	NA
RI	Trmt2a:chr16:18251358-18251474:18251358-18251660:18251548-18251660:+	chr16:18251474-18251548	0.216	0.191	0.187	0.195	0.153	0.158	0.206	0.154	0.306	0.062	0.212	0.05	0.23	0.169	0.224	NA	0.074	0.153	0.349	0.138	0.215	0.227	0.217	0.316
SE	Gemin5:chr11:58122281-58122378:58124931-58125418:58126431-58126594:-	chr11:58124931-58125418	NA	NA	NA	0.884	NA	NA	NA	NA	NA	NA	NA	NA	NA	NA	NA	NA	NA	NA	NA	NA	NA	NA	NA	NA
SE	Zmynd11:chr13:9698627-9698705:9720772-9720932:9735331-9735418:-	chr13:9720772-9720932	NA	0.985	NA	NA	NA	NA	NA	NA	NA	NA	NA	NA	0.993	NA	NA	NA	NA	NA	NA	NA	NA	NA	NA	NA
SE	1520401A03Rik:chr17:23717299-23717332:23718409-23718442:23718922-23718952:-	chr17:23718409-23718442	NA	NA	NA	NA	NA	NA	NA	0.994	NA	NA	NA	NA	NA	NA	NA	NA	NA	NA	NA	NA	NA	NA	NA	NA
SE	Bora:chr14:99046376-99046680:99047300-99047468:99049992-99050099:+	chr14:99047300-99047468	NA	NA	NA	NA	NA	NA	NA	NA	NA	NA	NA	0.825	NA	NA	0.8	NA	NA	NA	NA	NA	NA	NA	NA	NA
A3SS	Anks3:chr16:4942210-4942265:4942210-4942294:4942692-4942778:-	chr16:4942265-4942294	0.991	0.948	NA	NA	0.989	NA	0.992	NA	NA	NA	NA	NA	0.954	NA	NA	NA	0.989	NA	0.968	NA	NA	NA	0.985	NA
RI	Sec11c:chr18:65812664-65812814:65812664-65814957:65814837-65814957:+	chr18:65812814-65814837	0.156	0.098	0.103	0.187	0.227	0.204	0.133	0.264	0.222	0.237	0.164	0.233	0.157	0.143	0.067	0.055	0.091	0.219	0.077	0.209	0.217	0.07	0.261	0.076
SE	Tnrc18:chr5:142750379-142750634:142755380-142755659:142759710-142760071:-	chr5:142755380-142755659	0.981	0.996	NA	0.988	NA	0.982	0.97	0.994	0.968	0.956	0.958	0.99	NA	0.99	0.995	NA	NA	0.994	NA	0.982	0.98	NA	0.991	NA
SE	Nek1:chr8:61019842-61019910:61020035-61020122:61022210-61022265:+	chr8:61020035-61020122	NA	NA	NA	NA	NA	NA	NA	NA	NA	NA	NA	NA	NA	NA	0.953	NA	NA	NA	NA	0.966	NA	NA	NA	NA
SE	Igsf9b:chr9:27322843-27322960:27323208-27323359:27324176-27324288:+	chr9:27323208-27323359	NA	NA	NA	NA	NA	NA	NA	NA	NA	NA	NA	NA	NA	NA	NA	NA	NA	NA	0.909	NA	NA	NA	NA	NA
SE	Hip1:chr5:135406534-135410872:135411187-135411269:135412610-135412719:-	chr5:135411187-135411269	NA	NA	NA	NA	NA	NA	NA	NA	NA	NA	NA	NA	NA	NA	NA	NA	NA	NA	NA	NA	NA	0.985	NA	NA
SE	Thnsl2:chr6:71139748-71139943:71141684-71141752:71144290-71144347:-	chr6:71141684-71141752	NA	NA	NA	NA	NA	NA	NA	NA	NA	NA	NA	NA	NA	NA	NA	NA	NA	NA	NA	0.186	NA	NA	NA	NA
A3SS	Atrx:chrX:105832446-105832577:105832446-105832591:105836309-105836427:-	chrX:105832577-105832591	NA	NA	0.013	0.009	0.018	0.034	0.071	0.006	0.046	0.006	NA	0.039	NA	0.012	NA	0.093	NA	0.03	NA	0.064	0.068	0.01	0.009	0.052
SE	Wdr33:chr18:31827261-31827488:31829231-31829300:31833309-31833405:+	chr18:31829231-31829300	NA	NA	NA	NA	NA	0.976	NA	NA	NA	NA	NA	NA	NA	NA	NA	NA	NA	NA	NA	NA	NA	NA	NA	NA
SE	Tnfsf13os:chr11:69682137-69682147:69683426-69683526:69684403-69684673:+	chr11:69683426-69683526	0.499	NA	NA	NA	NA	NA	0.807	0.374	NA	NA	NA	NA	NA	NA	NA	NA	NA	NA	NA	NA	NA	NA	0.583	NA
SE	Rab1a:chr11:20201431-20201652:20215629-20215702:20223083-20223179:+	chr11:20215629-20215702	NA	NA	NA	NA	NA	NA	NA	NA	NA	NA	NA	NA	NA	NA	NA	NA	NA	0.988	NA	NA	NA	NA	NA	NA
A3SS	Rps18:chr17:33952220-33952312:33952220-33952591:33955077-33955176:-	chr17:33952312-33952591	0.999	0.999	0.999	NA	1	NA	NA	NA	NA	NA	NA	0.999	NA	NA	0.999	NA	NA	NA	NA	NA	NA	NA	NA	1
RI	Adam8:chr7:139987178-139987268:139987178-139987737:139987559-139987737:-	chr7:139987268-139987559	0.753	0.131	0.213	NA	0.253	0.124	0.388	0.315	0.169	0.404	0.612	0.229	0.404	0.283	0.184	NA	0.575	0.788	0.145	0.379	0.175	0.253	0.253	0.404
SE	Tdp2:chr13:24831678-24831929:24832009-24832095:24836854-24836946:+	chr13:24832009-24832095	NA	NA	NA	NA	NA	NA	NA	NA	0.927	NA	NA	NA	NA	NA	NA	NA	NA	NA	NA	NA	NA	NA	NA	0.941
A5SS	Srrd:chr5:112338001-112338047:112337975-112338047:112337391-112337741:-	chr5:112337975-112338001	0.405	0.439	0.262	0.386	0.146	0.111	0.086	0.321	0.157	0.276	0.196	0.159	0.572	0.155	0.335	NA	0.17	0.279	0.338	0.136	0.314	0.176	0.176	0.221
SE	Tm9sf1:chr14:55636015-55636612:55637858-55638070:55640384-55640570:-	chr14:55637858-55638070	0.957	NA	0.941	0.97	NA	0.99	0.992	0.974	0.952	0.957	0.966	0.975	0.944	0.969	NA	NA	NA	0.991	NA	0.932	0.95	0.919	0.964	0.98
SE	Cacna2d1:chr5:16162992-16163052:16194754-16194796:16212875-16213005:+	chr5:16194754-16194796	NA	NA	NA	NA	NA	NA	NA	NA	NA	NA	NA	NA	NA	0.983	NA	NA	NA	NA	NA	NA	NA	NA	NA	NA
SE	Cyp4f13:chr17:32930540-32930662:32932412-32932540:32932628-32932682:-	chr17:32932412-32932540	0.932	NA	0.821	NA	NA	NA	NA	NA	NA	NA	NA	NA	NA	NA	NA	NA	NA	NA	NA	NA	NA	0.959	NA	NA
SE	Zc3h11a:chr1:133647216-133647529:133653972-133654032:133661236-133661281:-	chr1:133653972-133654032	NA	NA	NA	NA	NA	NA	NA	NA	NA	NA	NA	NA	NA	NA	NA	NA	NA	NA	NA	NA	0.951	NA	NA	NA
SE	Prpf4b:chr13:34903108-34903273:34903529-34903602:34904043-34904089:+	chr13:34903529-34903602	0.528	0.359	0.291	0.268	0.365	0.303	0.285	0.309	0.109	0.126	0.287	0.208	0.558	0.479	0.326	0.499	0.299	0.284	0.372	0.222	0.466	0.282	0.445	0.313
SE	Myo1b:chr1:51766821-51766908:51768649-51768736:51769003-51769090:-	chr1:51768649-51768736	0.283	0.231	0.22	0.202	0.165	0.211	0.054	0.365	0.091	0.26	0.028	0.092	0.174	0.073	0.192	0.317	0.231	0.454	0.24	0.231	NA	0.172	0.017	0.204
SE	Larp4b:chr13:9122107-9122226:9123902-9123962:9136778-9136926:+	chr13:9123902-9123962	NA	NA	NA	0.988	NA	NA	NA	NA	NA	NA	NA	NA	NA	NA	NA	NA	NA	NA	NA	NA	NA	NA	NA	NA
SE	Alg13:chrX:144338963-144339014:144339724-144339771:144340719-144340792:+	chrX:144339724-144339771	NA	NA	NA	NA	0.639	NA	NA	NA	NA	NA	0.901	NA	NA	NA	NA	NA	NA	NA	NA	NA	NA	NA	NA	NA
SE	2610001J05Rik:chr6:13869799-13870740:13871055-13871163:13871438-13871466:-	chr6:13871055-13871163	NA	0.985	0.987	0.969	NA	NA	NA	NA	0.978	NA	0.991	NA	NA	NA	0.986	NA	NA	NA	NA	0.974	0.981	NA	0.988	NA
SE	Pkm:chr9:59656597-59656649:59658998-59659153:59665199-59665367:+	chr9:59658998-59659153	0.001	0.001	NA	0.001	NA	NA	NA	NA	NA	NA	0.003	NA	0	0	0	NA	NA	0	NA	NA	NA	NA	0.001	NA
SE	Vps39:chr2:120345617-120345660:120346327-120346392:120350163-120350229:-	chr2:120346327-120346392	0.924	0.871	0.912	0.943	0.951	0.94	0.938	0.925	0.946	0.814	0.88	0.92	0.942	NA	0.696	NA	0.83	0.982	0.931	0.834	0.892	0.878	0.98	0.871
SE	Zfp143:chr7:110061709-110061775:110069483-110069602:110070477-110070570:+	chr7:110069483-110069602	NA	NA	NA	NA	NA	NA	NA	NA	NA	NA	NA	NA	NA	NA	NA	NA	NA	NA	NA	NA	NA	NA	0.914	NA
SE	Itpr1:chr6:108417876-108418000:108432645-108432696:108438299-108438432:+	chr6:108432645-108432696	0.184	0.217	0.313	0.128	0.157	0.23	0.084	0.081	0.085	0.023	0.146	0.124	0.17	0.05	0.338	0.256	0.244	0.199	0.498	0.065	0.101	0.356	0.214	0.251
SE	Hadhb:chr5:30168523-30168568:30169495-30169595:30172625-30172713:+	chr5:30169495-30169595	NA	NA	NA	NA	NA	NA	NA	NA	NA	NA	0.998	0.997	NA	NA	NA	NA	NA	NA	NA	NA	NA	NA	NA	0.997
A5SS	Pank2:chr2:131273910-131274120:131273910-131274263:131293398-131293524:+	chr2:131274120-131274263	0.984	0.918	NA	0.979	0.893	0.963	NA	0.968	0.956	NA	NA	0.811	0.898	0.902	0.889	NA	NA	NA	0.891	0.844	NA	0.915	0.907	0.826
SE	Xpnpep1:chr19:53013398-53013503:53014610-53014674:53025258-53025383:-	chr19:53014610-53014674	NA	NA	0.995	NA	0.989	NA	NA	NA	NA	NA	NA	NA	NA	NA	NA	NA	NA	NA	NA	NA	NA	0.996	NA	NA
A3SS	Hif1a:chr12:73941729-73941852:73941687-73941852:73940347-73940631:+	chr12:73941687-73941729	0.867	0.723	0.737	0.761	0.738	0.729	0.777	0.694	0.712	0.737	0.699	0.727	0.795	0.733	0.683	0.826	0.681	0.817	0.751	0.764	0.778	0.621	0.751	0.671
SE	Gstcd:chr3:133062565-133062659:133071899-133072151:133082038-133082506:-	chr3:133071899-133072151	NA	NA	NA	NA	NA	NA	NA	NA	NA	NA	NA	NA	0.913	NA	NA	NA	NA	NA	NA	NA	NA	NA	NA	NA
SE	Scfd1:chr12:51422693-51423003:51426037-51426108:51427864-51427944:+	chr12:51426037-51426108	NA	NA	NA	NA	NA	NA	NA	NA	NA	NA	NA	0.97	NA	NA	NA	NA	NA	NA	NA	NA	NA	NA	NA	NA
SE	Arfip2:chr7:105637119-105637278:105637651-105637725:105637862-105637915:-	chr7:105637651-105637725	0.857	NA	NA	0.903	NA	NA	NA	NA	NA	NA	NA	NA	NA	NA	NA	NA	NA	NA	NA	0.762	NA	NA	NA	NA
SE	Ppcdc:chr9:57412667-57414726:57415085-57415472:57434902-57435085:-	chr9:57415085-57415472	0.968	NA	NA	NA	NA	0.973	0.95	0.938	NA	NA	0.948	NA	NA	NA	NA	NA	NA	NA	NA	NA	NA	NA	0.972	NA
SE	Ntm:chr9:28996230-28996634:29000704-29000737:29006253-29006289:-	chr9:29000704-29000737	NA	0.551	NA	NA	NA	NA	NA	NA	NA	NA	NA	NA	NA	NA	NA	NA	NA	NA	NA	NA	NA	NA	NA	NA
SE	Stom:chr2:35325313-35325386:35326420-35326524:35336858-35336976:-	chr2:35326420-35326524	NA	NA	NA	NA	NA	NA	0.996	NA	NA	NA	NA	NA	0.986	NA	0.992	NA	NA	NA	NA	NA	NA	NA	NA	NA
SE	Zdhhc6:chr19:55311624-55311784:55312766-55312894:55313188-55313280:-	chr19:55312766-55312894	NA	NA	NA	NA	NA	NA	0.005	NA	NA	NA	NA	NA	NA	NA	NA	NA	NA	NA	NA	NA	NA	NA	NA	NA
SE	Apaf1:chr10:91031548-91031710:91036909-91037035:91039784-91039916:-	chr10:91036909-91037035	NA	0.985	NA	NA	NA	NA	NA	NA	NA	NA	NA	NA	NA	NA	NA	NA	NA	0.919	NA	NA	NA	NA	NA	NA
SE	Nav1:chr1:135450785-135450940:135452171-135452407:135452804-135452964:-	chr1:135452171-135452407	NA	0.99	NA	NA	NA	NA	NA	NA	NA	NA	NA	NA	NA	NA	NA	NA	NA	NA	NA	NA	NA	NA	NA	NA
SE	Dctn3:chr4:41715395-41715455:41716395-41716454:41717356-41717440:-	chr4:41716395-41716454	NA	NA	NA	NA	NA	NA	NA	NA	NA	NA	NA	0.996	NA	NA	NA	NA	NA	NA	NA	NA	NA	NA	NA	NA
SE	Ssbp4:chr8:70599687-70599757:70599839-70599899:70600395-70600485:-	chr8:70599839-70599899	0.786	0.766	0.636	0.842	0.846	0.678	0.618	0.739	0.917	0.859	0.83	0.813	0.757	0.675	0.826	0.687	0.658	0.812	0.953	0.864	0.824	0.837	0.838	0.914
A5SS	Tyw5:chr1:57393669-57393694:57393584-57393694:57393349-57393487:-	chr1:57393584-57393669	0.389	0.489	NA	NA	NA	NA	NA	0.56	NA	NA	NA	NA	NA	NA	NA	NA	0.761	NA	0.793	NA	NA	0.389	NA	0.515
SE	4921504A21Rik:chr5:19202367-19203925:19207084-19207172:19210227-19210322:-	chr5:19207084-19207172	NA	NA	0.557	0.386	NA	NA	NA	NA	NA	0.386	NA	NA	NA	NA	NA	NA	NA	NA	NA	NA	NA	NA	0.173	NA
SE	Apol6:chr15:77045664-77045758:77047030-77047131:77050606-77050699:+	chr15:77047030-77047131	0.964	NA	NA	NA	NA	NA	NA	NA	NA	NA	NA	NA	NA	NA	NA	NA	NA	NA	NA	NA	NA	NA	NA	NA
SE	Rad18:chr6:112664350-112665338:112672123-112672200:112675745-112675776:-	chr6:112672123-112672200	NA	NA	NA	NA	NA	NA	NA	NA	NA	NA	0.905	NA	NA	NA	NA	NA	NA	NA	NA	NA	NA	NA	NA	NA
SE	Rab28:chr5:41624975-41625862:41626986-41627081:41633172-41633250:-	chr5:41626986-41627081	0.1	0.081	0.046	0.078	0.046	0.011	0.013	0.061	0.099	0.069	0.01	0.041	0.047	0.061	0.075	0.11	0.102	0.052	0.041	0.084	0.114	0.062	0.03	0.034
A5SS	Rab34:chr11:78191207-78191265:78191207-78191289:78191364-78191455:+	chr11:78191265-78191289	NA	NA	0.996	0.994	0.997	NA	NA	NA	0.997	NA	0.995	0.998	NA	0.986	NA	NA	NA	NA	NA	0.982	NA	NA	0.998	NA
SE	Pkig:chr2:163658414-163658492:163659149-163659235:163703485-163703555:+	chr2:163659149-163659235	0.167	0.076	0.055	0.202	NA	0.098	0.458	0.109	0.126	0.05	0.118	0.16	0.043	0.082	0.063	NA	0.123	0.108	0.374	0.264	0.276	0.116	0.133	0.059
SE	Soat1:chr1:156432846-156432982:156434152-156434251:156435792-156435890:-	chr1:156434152-156434251	NA	NA	NA	NA	NA	NA	NA	NA	NA	NA	NA	NA	NA	NA	NA	NA	NA	0.994	NA	NA	NA	NA	NA	NA
SE	Ncor1:chr11:62338858-62339068:62340407-62340629:62342996-62343351:-	chr11:62340407-62340629	0.985	NA	NA	NA	0.955	NA	NA	NA	NA	NA	NA	NA	NA	NA	NA	NA	NA	NA	NA	NA	0.993	NA	NA	NA
A5SS	Cdan1:chr2:120722656-120722758:120722609-120722758:120720881-120720989:-	chr2:120722609-120722656	0.864	0.732	0.263	0.837	0.753	0.934	0.93	0.919	0.747	NA	0.814	0.842	NA	0.875	0.792	NA	0.783	0.76	NA	0.72	0.717	0.944	0.771	NA
SE	Ift46:chr9:44774182-44774231:44778561-44778638:44782099-44782129:+	chr9:44778561-44778638	NA	NA	NA	NA	NA	NA	NA	NA	NA	NA	0.97	NA	NA	NA	NA	NA	NA	NA	NA	NA	NA	NA	NA	NA
SE	Pla2g6:chr15:79317760-79318010:79327634-79327714:79328088-79328203:-	chr15:79327634-79327714	NA	NA	0.886	NA	0.765	NA	NA	NA	NA	0.912	0.847	NA	NA	NA	NA	NA	0.954	NA	NA	NA	NA	0.707	0.661	0.872
SE	Cbr3:chr16:93683258-93683613:93684676-93684760:93685046-93685154:+	chr16:93684676-93684760	0.014	NA	NA	NA	NA	NA	NA	NA	NA	NA	NA	NA	NA	NA	NA	NA	NA	NA	NA	NA	0.013	NA	NA	NA
SE	Stra6:chr9:58140413-58140553:58140858-58140882:58141055-58141112:+	chr9:58140858-58140882	NA	0.983	0.975	NA	NA	NA	NA	NA	NA	NA	NA	NA	NA	NA	0.982	NA	0.986	NA	0.953	NA	NA	0.992	NA	0.995
SE	Usf2:chr7:30955289-30955440:30955880-30956000:30956148-30956267:-	chr7:30955880-30956000	0.964	0.936	0.89	0.958	0.957	0.961	0.909	0.944	0.825	0.939	0.879	0.952	0.932	0.969	0.911	NA	0.871	0.909	0.789	0.971	0.95	0.916	0.873	0.97
SE	Col5a1:chr2:28017094-28017202:28017280-28017334:28017425-28017479:+	chr2:28017280-28017334	NA	NA	NA	NA	NA	NA	NA	NA	NA	NA	NA	NA	NA	NA	NA	NA	NA	NA	NA	0.998	NA	NA	NA	NA
RI	Flt4:chr11:49626255-49626395:49626255-49626837:49626668-49626837:+	chr11:49626395-49626668	NA	NA	NA	NA	0.261	0.124	NA	0.164	0.048	NA	NA	0.131	NA	0.045	0.025	NA	0.289	0.15	NA	NA	NA	0.026	NA	0.036
A5SS	Dmpk:chr7:19088000-19088109:19088000-19088264:19088910-19088996:+	chr7:19088109-19088264	NA	NA	0.986	NA	0.991	NA	NA	NA	NA	NA	NA	NA	NA	NA	NA	NA	NA	0.983	NA	NA	0.992	NA	0.959	0.994
A3SS	Jkamp:chr12:72089332-72089406:72089314-72089406:72085588-72085673:+	chr12:72089314-72089332	NA	NA	NA	NA	NA	NA	NA	0.947	0.904	NA	NA	NA	NA	NA	NA	NA	NA	NA	NA	NA	0.889	NA	NA	NA
SE	Tns3:chr11:8541166-8541231:8545228-8545351:8547270-8547321:-	chr11:8545228-8545351	0.996	NA	NA	NA	NA	NA	NA	NA	NA	NA	NA	NA	NA	NA	NA	NA	NA	NA	NA	NA	0.996	NA	NA	NA
SE	B4galt2:chr4:117876879-117876984:117877096-117877219:117877438-117877629:-	chr4:117877096-117877219	0.992	0.985	0.969	NA	0.991	0.982	0.992	0.99	NA	NA	0.995	0.994	NA	0.989	0.973	NA	0.984	NA	NA	NA	NA	NA	0.989	0.95
SE	Tango2:chr16:18312424-18312758:18316645-18316734:18324356-18324423:-	chr16:18316645-18316734	NA	NA	NA	NA	NA	NA	NA	NA	NA	NA	NA	NA	NA	NA	NA	NA	0.988	NA	NA	NA	NA	NA	NA	NA
SE	Wdfy1:chr1:79718973-79719274:79722213-79722268:79724644-79724757:-	chr1:79722213-79722268	0.916	NA	0.898	NA	0.801	0.622	NA	0.472	0.921	0.305	0.876	0.836	0.745	0.814	0.872	NA	0.964	NA	0.809	0.95	0.646	0.955	0.594	0.578
SE	Uqcrc1:chr9:108936713-108936787:108937066-108937156:108942083-108942170:+	chr9:108937066-108937156	NA	NA	NA	NA	NA	NA	NA	NA	NA	NA	NA	NA	NA	NA	NA	NA	0.997	NA	NA	NA	NA	NA	NA	NA
SE	Exoc2:chr13:30877547-30877613:30882248-30882373:30886188-30886314:-	chr13:30882248-30882373	NA	NA	NA	NA	NA	NA	NA	NA	NA	NA	NA	NA	NA	NA	NA	NA	NA	NA	0.986	NA	NA	NA	0.968	NA
RI	Dtx2:chr5:136026469-136026607:136026469-136028572:136028498-136028572:+	chr5:136026607-136028498	0.057	0.058	0.075	0.119	0.048	0.066	0.06	0.099	0.084	0.131	0.069	0.105	0.159	0.039	0.022	NA	0.046	0.087	0.048	0.04	0.115	0.041	0.045	0.052
SE	Abi3bp:chr16:56615564-56615612:56634458-56634539:56642488-56642560:+	chr16:56634458-56634539	NA	NA	NA	NA	NA	NA	NA	NA	NA	NA	NA	0.43	NA	NA	NA	NA	NA	NA	NA	NA	NA	NA	NA	NA
SE	Smarca2:chr19:26706067-26706231:26710457-26710685:26716114-26716192:+	chr19:26710457-26710685	NA	NA	NA	NA	NA	NA	NA	NA	NA	NA	NA	NA	NA	NA	NA	NA	NA	NA	NA	NA	NA	NA	0.979	NA
A5SS	Chrd:chr16:20739406-20739510:20739406-20740056:20741189-20741344:+	chr16:20739510-20740056	NA	NA	NA	NA	NA	NA	NA	NA	NA	NA	NA	NA	NA	NA	NA	NA	NA	0.622	NA	NA	NA	NA	0.702	NA
SE	Gas5:chr1:161036207-161036244:161036819-161037164:161037287-161037315:+	chr1:161036819-161037164	NA	NA	NA	NA	NA	NA	0.993	NA	NA	NA	NA	NA	NA	NA	NA	NA	NA	NA	NA	NA	NA	NA	NA	NA
A3SS	Foxm1:chr6:128372533-128372603:128372530-128372603:128371967-128372012:+	chr6:128372530-128372533	0.07	NA	NA	0.038	NA	0.296	0.07	0.034	0.329	0.172	NA	0.238	0.353	0.102	0.329	NA	0.37	0.24	0.632	0.388	NA	0.495	0.182	0.246
SE	Spns1:chr7:126372411-126372567:126372744-126372890:126373769-126373836:-	chr7:126372744-126372890	NA	NA	NA	NA	NA	NA	NA	NA	0.986	NA	NA	NA	NA	NA	NA	NA	NA	NA	NA	NA	NA	NA	NA	NA
SE	Epb41:chr4:131937014-131937464:131955542-131955578:131957642-131957819:-	chr4:131955542-131955578	0.273	0.212	NA	NA	NA	NA	NA	NA	0.212	NA	0.502	NA	NA	NA	0.187	NA	NA	NA	NA	NA	0.139	0.446	NA	NA
SE	Setdb1:chr3:95337148-95337265:95338345-95339032:95339906-95340062:-	chr3:95338345-95339032	NA	0.988	NA	NA	NA	NA	NA	NA	NA	NA	NA	NA	NA	NA	0.987	NA	NA	NA	NA	NA	NA	NA	NA	NA
SE	Ergic3:chr2:156017493-156017716:156017796-156017852:156018070-156018096:+	chr2:156017796-156017852	NA	NA	NA	NA	NA	NA	NA	NA	NA	NA	NA	NA	NA	NA	NA	NA	NA	NA	NA	0.999	NA	NA	NA	NA
SE	Denr:chr5:123908099-123908214:123917199-123917284:123922179-123922263:+	chr5:123917199-123917284	0.985	0.974	0.988	NA	0.989	0.964	0.994	NA	NA	0.987	NA	NA	NA	NA	NA	NA	NA	NA	NA	NA	NA	NA	0.963	NA
SE	Rin2:chr2:145712454-145712578:145737382-145737454:145786321-145787327:+	chr2:145737382-145737454	0.745	0.386	0.36	0.702	0.71	NA	NA	NA	0.447	NA	NA	0.928	NA	0.637	NA	NA	NA	0.939	0.729	0.586	0.574	0.529	0.621	0.288
SE	Eif4a2:chr16:23110579-23110723:23111125-23111263:23111502-23111558:+	chr16:23111125-23111263	NA	NA	NA	0.998	NA	0.999	0.999	NA	NA	0.998	0.999	0.998	0.999	NA	NA	NA	NA	NA	NA	NA	0.999	NA	NA	NA
SE	Uros:chr7:133689581-133689680:133690507-133690593:133697668-133697743:-	chr7:133690507-133690593	NA	NA	0.976	NA	NA	NA	NA	NA	NA	NA	0.979	NA	NA	NA	NA	NA	NA	NA	NA	NA	NA	NA	NA	NA
SE	Meis3:chr7:16177960-16178011:16178744-16179100:16182040-16182152:+	chr7:16178744-16179100	NA	0.931	0.95	NA	NA	NA	NA	NA	NA	NA	NA	NA	NA	NA	NA	NA	0.744	0.838	NA	NA	NA	NA	NA	NA
SE	Nek9:chr12:85320713-85320906:85322028-85322079:85325307-85325372:-	chr12:85322028-85322079	NA	NA	NA	NA	NA	NA	NA	NA	NA	NA	NA	NA	NA	NA	NA	0.898	NA	NA	NA	NA	NA	NA	NA	NA
SE	St3gal1:chr15:67113506-67114357:67153042-67153170:67176631-67176830:-	chr15:67153042-67153170	NA	NA	NA	NA	NA	NA	NA	NA	NA	NA	NA	NA	NA	NA	NA	NA	0.992	NA	NA	NA	NA	NA	NA	NA
SE	Ppp5c:chr7:17015397-17015545:17022414-17022656:17027692-17027809:-	chr7:17022414-17022656	NA	NA	0.995	0.993	0.993	NA	NA	NA	NA	NA	NA	NA	NA	NA	NA	NA	NA	NA	NA	0.986	NA	NA	NA	NA
SE	Lmbr1:chr5:29292822-29292949:29323801-29323824:29346766-29346906:-	chr5:29323801-29323824	0.464	0.812	0.733	0.11	0.698	0.684	0.426	0.302	0.536	0.265	0.548	0.722	0.484	0.565	0.874	NA	0.656	0.435	0.722	0.431	0.634	0.88	NA	0.874
RI	Dcp1b:chr6:119214769-119215606:119214769-119217979:119217901-119217979:+	chr6:119215606-119217901	NA	NA	0.77	NA	NA	NA	NA	NA	NA	NA	NA	NA	NA	NA	NA	NA	NA	NA	NA	NA	NA	NA	NA	NA
SE	Larp1:chr11:58042435-58042642:58042743-58042906:58043905-58044050:+	chr11:58042743-58042906	NA	NA	NA	NA	NA	NA	NA	NA	NA	NA	NA	NA	NA	NA	NA	NA	0.987	NA	NA	NA	NA	NA	NA	NA
SE	Fndc3b:chr3:27642950-27643089:27682737-27682814:27710370-27710398:-	chr3:27682737-27682814	0.116	0.142	NA	NA	0.841	0.725	0.497	0.569	0.664	0.361	0.248	0.664	NA	0.128	0.305	NA	0.397	0.569	NA	0.452	NA	0.086	NA	0.569
SE	Prickle2:chr6:92416735-92416922:92420142-92420346:92422330-92422468:-	chr6:92420142-92420346	NA	NA	NA	NA	NA	NA	NA	NA	NA	0.907	NA	NA	NA	NA	NA	NA	NA	NA	NA	NA	NA	NA	NA	NA
A3SS	H2-Ke6:chr17:34026032-34026225:34026032-34026470:34026850-34026935:-	chr17:34026225-34026470	NA	NA	NA	NA	0.881	NA	NA	NA	0.787	0.514	0.914	NA	NA	NA	0.841	NA	NA	NA	NA	NA	NA	NA	NA	NA
RI	Tnfaip3:chr10:19003575-19003757:19003575-19005331:19004456-19005331:-	chr10:19003757-19004456	0.013	0.06	0.035	0.039	NA	0.108	0.174	0.105	0.12	0.045	0.26	0.066	NA	0.204	0.075	NA	0.027	0.26	0.149	0.17	0.06	0.052	0.105	0.084
SE	Coq8a:chr1:180168772-180168880:180169079-180169221:180169415-180169509:-	chr1:180169079-180169221	0.987	NA	NA	NA	NA	NA	NA	NA	NA	NA	NA	NA	NA	NA	NA	NA	NA	NA	NA	NA	NA	NA	NA	NA
SE	Prmt3:chr7:49806526-49806626:49818031-49818110:49826707-49826894:+	chr7:49818031-49818110	NA	0.951	0.963	0.969	0.958	NA	0.973	NA	NA	NA	NA	NA	NA	NA	0.967	0.863	0.959	NA	NA	NA	NA	0.973	NA	NA
SE	Mthfsd:chr8:121097556-121097925:121098707-121098771:121098998-121099152:-	chr8:121098707-121098771	NA	NA	NA	NA	NA	NA	0.964	NA	NA	NA	NA	NA	NA	NA	NA	NA	NA	NA	NA	NA	NA	NA	NA	NA
SE	Kdm5c:chrX:152271011-152271593:152271859-152271929:152272074-152272274:+	chrX:152271859-152271929	0.971	0.888	0.984	0.973	NA	NA	0.964	NA	0.922	NA	0.968	NA	NA	NA	NA	NA	0.984	0.958	NA	0.991	0.985	0.987	NA	NA
SE	Slc35e1:chr8:72488120-72488246:72489451-72489589:72491841-72491912:-	chr8:72489451-72489589	NA	0.951	NA	NA	0.91	NA	0.922	NA	0.945	0.989	0.973	0.947	NA	NA	NA	NA	NA	0.981	NA	NA	NA	NA	0.97	0.981
SE	Senp2:chr16:22032103-22032164:22036469-22036646:22038536-22038668:+	chr16:22036469-22036646	NA	0.985	0.94	NA	0.988	0.95	NA	0.986	0.987	NA	NA	0.971	NA	NA	0.977	NA	0.965	0.985	NA	NA	NA	0.977	0.972	0.978
SE	Slco2a1:chr9:103073147-103073312:103074375-103074565:103076923-103077089:+	chr9:103074375-103074565	NA	NA	NA	NA	0.991	NA	NA	NA	NA	NA	NA	NA	NA	NA	NA	NA	NA	NA	NA	NA	0.995	NA	0.829	NA
SE	Fig4:chr10:41277357-41277514:41285289-41285413:41285600-41285699:-	chr10:41285289-41285413	NA	NA	NA	NA	NA	NA	NA	NA	NA	NA	NA	NA	NA	NA	0.977	NA	NA	NA	NA	NA	NA	NA	NA	NA
SE	Nceh1:chr3:27222667-27222896:27226072-27226142:27239531-27239584:+	chr3:27226072-27226142	NA	NA	NA	NA	NA	NA	NA	NA	NA	NA	NA	NA	NA	NA	NA	NA	NA	NA	0.995	NA	NA	0.994	NA	NA
[truncated: 50,174 more rows]
