# Supplementary figures and images for: Multi-omics characterization of partial chemical reprogramming reveals evidence of cell rejuvenation
Source: eLife journal article supplement (doi:10.7554/elife.90579), 2023-10-27

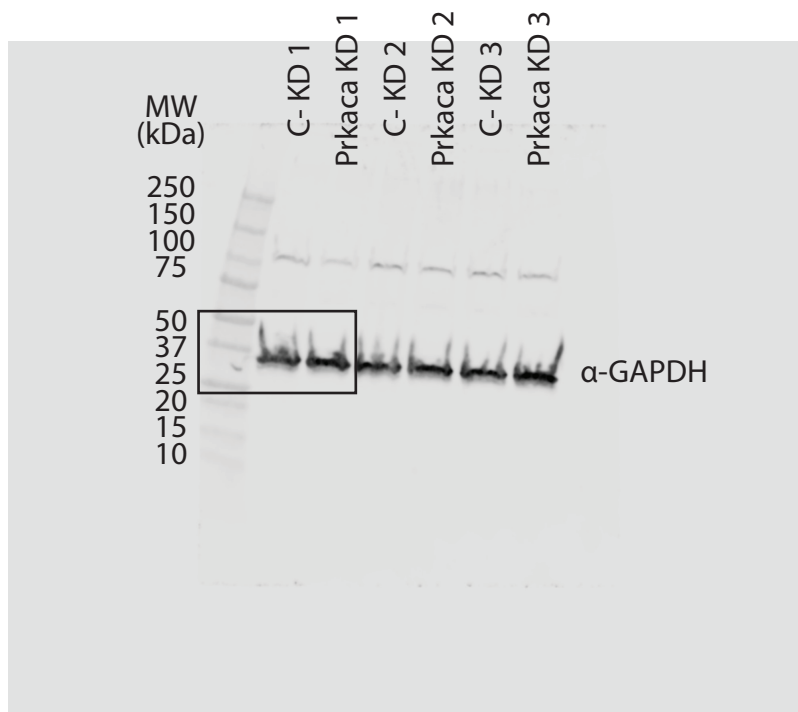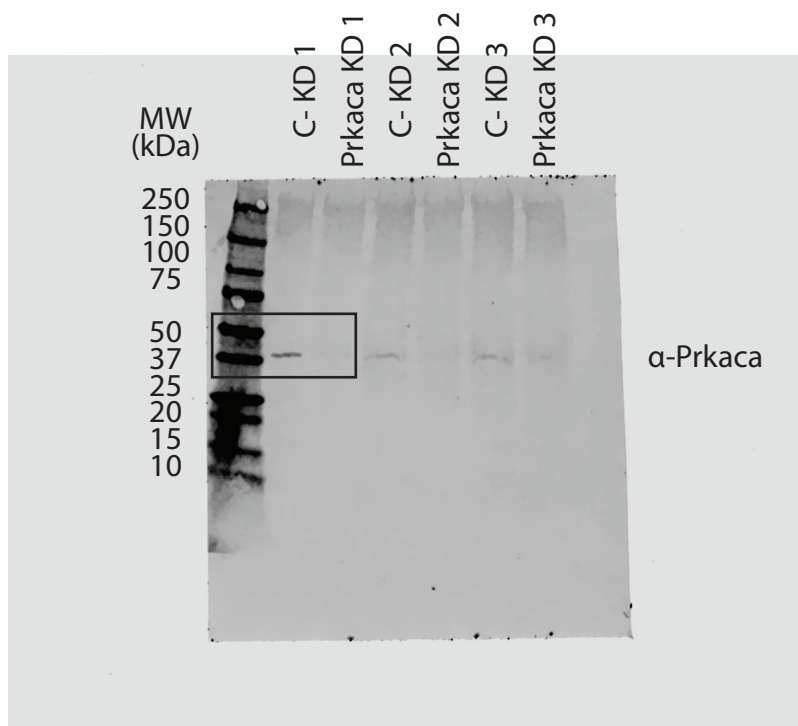

**B**

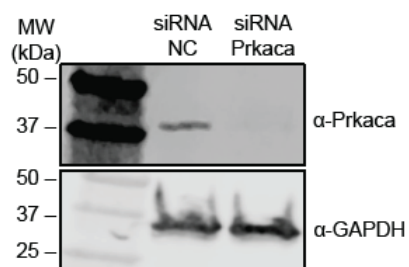

Supplement: fig5-data4 [file elife-90579-fig5-data4-v1.zip]
